# Supplementary material for: Multi-ancestry GWAS of the electrocardiographic PR interval identifies 202 loci underlying cardiac conduction
Source: Nat Commun. 2020 May 21;11:2542. doi: 10.1038/s41467-020-15706-x (PMC7242331; doi:10.1038/s41467-020-15706-x)
Supplement: Supplementary file 4 — Supplementary Data 1 [file 41467_2020_15706_MOESM4_ESM.xlsx]

## Sheet: SD1 Study genotyping, GWAS
Supplementary Data 1 Description of studies contributing to multi-ancestry meta-analysis: genotyping, quality control, pre-phasing, imputation, and association analyses.
EA, European ancestry; AA, African ancestry; HA, Hispanic ancestry; BR, Brazilians; AS, Asian ancestry.
NA: not available
		Genotyping		Sample quality control	SNP quality control				Imputation						Association analysis
Study short name	Ancestry	Array	Calling algorithm	Call rate	Call rate	HWE P value	MAF	Additional filters	N SNPs used for imputation	Software	Reference panel	Haplotypes used for reference panel	Filtering of imputed genotypes	Chromosome X imputation	Software	PR interval (ms) - autosomes	transformed PR interval - autosomes	PR interval (ms) - chromosome X	transformed PR interval - chromosome X	principal component adjustment
AGES	EA	Illumina Hu370CNV	Illumina BeadStudio	≥0.97	≥0.97	≥1E-6	≥0.01		324194	Minimac	1000G March 2012	All ethnicities	None	Y	ProbABEL	Y	Y	Y	Y	First 2 PCs
AMISH	EA	Affymetrix 500K and 6.0	MACH, minimac	≥0.95	≥0.95	≥1E-6	≥0.01	None	397704	Minimac	1000G March 2012	CEU	None	N	MMAP	Y	Y	N	N	No, but adjusted for pedigree and kinship
ARIC	EA	Affymetrix 6.0	Birdseed	≥0.95	≥0.95	≥1E-5	≥0.005	None	711589	IMPUTE2	1000G March 2012	All ethnicities	None	Y	FAST	Y	Y	Y	Y	Top 4 PCs
BioME-Omni	EA	Illumina HumanOmniExpressExome-8 v1.0	Genome Studio	≥0.98	≥0.95	≥5E-5	0	Het coef < -0.1 or > 0.3; Inbred coef 0.4 or > 0.9 for variants MAF < 0.01	866864	IMPUTE2	1000G Septemer 2014	All ethnicities	Imputation quality > 0.1	N	SNPTEST, qctool	Y	Y	N	N	NA
BRIGHT	EA	Affymetrix GeneChip 500k array	CHIAMO	≥0.97	≥0.95	≥1E-7	0	None	446472	Minimac	1000G March 2012	All ethnicities	Imputation quality > 0.1	Y	mach2qtl	Y	Y	N	N	PCs were added as covariates in the model after calculating residuals.
Broad AF (controls)	EA	Infinium PsychArray-24 v1.1	Birdseed/GenCall/Zcall	≥0.97	≥0.98	AF Controls ≥1e-6	≥0.005	Heterozygosity: |FHET|≤0.2	268536	IMPUTE2	1000G March 2012	All ethnicities	Imputation quality > 0.3, MAF > 0.01	N	Plink	Y	Y	N	N	First 10 PCs
CAMP (MGH CAMP)	EA	Infinium HumanCoreExome-24 BeadChips	Birdsuite	≥0.95	≥0.95	≥1E-6	≥0.01	None	224343	IMPUTE2	1000G March 2012	All ethnicities	Imputation quality > 0.1	Y	Plink	Y	Y	Y	Y	First 10 PCs
CHRIS	EA	Illumina HumanOmniExpressExome Bead Chip	Genome Studio	≥0.99	≥0.99	≥1E-6	≥0.01	None	648036	Minimac3	1000G Septemer 2014	All ethnicities	Imputation quality ≥ 0.3	N	Epacts	Y	Y	N	N	NA
CHS	EA	Illumina 370CNV BeadChip	Genome Studio	≥0.95	≥0.97	≥1E-5	NA	>2 duplicate errors or Mendelian inconsistencies (for reference CEPH trios), heterozygote frequency =0	359592	Minimac	1000G March 2012	2010-11 data freeze, 2013-09 haplotypes	Variants with insufficient effective minor alleles are filtered prior to analysis. This threshold was set at 5 effective alleles. Where effective alleles is defined as MAF*sampleN*2*impQuality	Y	R	Y	Y	Y	Y	PCs 1-9
CROATIA-Korcula	EA	Illumina HumanHap 370CNV DUO/QUAD Phase 1	BeadStudio-Gencall v3.0	≥0.97	≥0.98	≥1E-6	>0.01		317898	IMPUTE2	1000G March 2012	All ethnicities	Monomorphic	Y	ProbABEL	Y	Y	Y	Y	No, but correction for an IBS matrix was incorporated when calculating residuals
CROATIA-Split	EA	Illumina HumanHap 370CNV QUAD Phase 1	BeadStudio-Gencall v3.0	≥97%	≥0.98	>1E-6	≥0.01		321456	IMPUTE2	1000G March 2012	All ethnicities	None	Y	ProbABEL	Y	Y	Y	Y	No, but correction for an IBS matrix was incorporated when calculating residuals
DeCODE	EA	Illumina HumanHap300, HumanCNV370, HumanHap610, HumanHap1M, HumanHap660, Omni-1, Omni 2.5 or Omni Express bead chips	GATK	≥0.97	≥0.95	>0.001	>0.01	SNPs were excluded if there was substantial difference in allele frequency between chip types (from just a single chip if that resolved all differences, but from all chips otherwise), or if they produced an excessive inheritance error rate (over 0.001)	676913	Inhouse imputation methods (similar to IMPUTE)	Based on whole genome sequencing data of 8,453 Icelanders to an average depth of around 30X (https://www.nature.com/ng/journal/v47/n5/full/ng.3247.html) and matched to 1000G September 2014	Icelanders	None	Y	Inhouse software	Y	Y	Y	Y	NA
ERF	EA	Illumina 318/370 K, Affymetrix 250 K, and Illumina 6 K	BeadStudio	≥0.95	≥0.98	≥1E-6	>0.01	IBS	678524	Minimac	1000G March 2012	All ethnicities	None	N	GenABEL/ProbABEL	Y	Y	N	N	No, but family structure was used to account for substructure
FHS	EA	Affymetrix Gene Chip® 500K Array Set & 50K Human Gene Focused Panel	BRLMM	≥0.95	≥0.97	≥1E-6	≥0.01		445149	MACH	1000G March 2012	All ethnicities	Imputation quality ≥ 0.1	Y	R -- FHS pipeline	Y	Y	N	N	No, but adjusted for generation and kinship
FINCAVAS-MC	EA	Metabochip	Genome Studio	≥0.95	≥0.95	≥1E-6	0	None	167995	IMPUTE2	1000G March 2012	All ethnicities	None	Y	SNPTEST	Y	Y	N	N	First 4 PCs
GAPP	EA	Illumina HumanCoreExome	BeadStudio	≥0.98	≥0.98	≥1E-6	≥0.01	None	269535	IMPUTE2	1000G June 2014 for autosomes, 1000G March 2012 for chromosome X	All ethnicities	Imputation quality ≥ 0.1	Y	SNPTEST	Y	Y	Y	Y	First 10 PCs
GRAPHIC	EA	HumanOmniExpress-12v1 array	Illumina	≥0.95	>95% (or >99% if SNP has MAF<5%)	≥1E-6	≥0.01		607303	IMPUTE2	1000G March 2012	All ethnicities	None	n	SNPTEST	Y	Y	N	N	NA
GS-SFHS	EA	HumanOmniExpressExome8v1-2_A or HumanOmniExpressExome-8v1_A	BeadStudio-Gencall v3.0	≥0.98	≥0.98	≥1E-6	≥0.01		630207	IMPUTE2	1000G March 2012	All ethnicities	Monomorphic	Y	ProbABEL	Y	Y	Y	Y	No, but correction for an IBS matrix was incorporated when calculating residuals
H2000	EA	Broad_GWAS_supplemental_15061359_A1, Illumina HumanCoreExome-24-v1-1_A, IlluminaHuman610 (K or Quadv1_B, so-called GenMets study)	birdseed, Zcall, Zcall	≥0.95	≥0.98	≥1E-6	>0.35	Relatedness Pi_hat<0.2	245722, 543727, 555388	IMPUTE2	Combined panel of 2902 hcWGS samples and 5092 WES samples	Finnish	HWE_P ≥ 1e-6 & Imputation quality ≥ 0.1 & CALL_RATE > 0.95	Y	SNPTEST	Y	Y	Y	Y	PC were added as covariates in the model after calculating residuals.
INGI-CARL	EA	Illumina 370K	Genome Studio	≥0.95	≥0.97	≥1E-4	≥0.01	None	309430	IMPUTE2	1000G March 2012	All ethnicities	MAF > 0.01	Y	GenABEL	Y	Y	Y	Y	NA
INGI-FVG	EA	Illumina 370K + OmniExpress	Genome Studio	≥0.95	≥0.97	≥1E-4	≥0.01	None	194755	IMPUTE2	1000G March 2012	All ethnicities	MAF ≥ 0.01	Y	GenABEL	Y	Y	Y	Y	NA
KORAF3	EA	Illumina Omni 2.5/Illumina Omni Express	Genome Studio	≥0.97	≥0.98	≥5E-6	0.01	None	602932	IMPUTE2	1000G March 2012	All ethnicities	Monomorphic	Y	SNPTEST v2	Y	Y	Y	Y	NA
KORAS4	EA	Affymetrix Axiom	Affymetrix Software	≥0.97	≥0.98	≥5E-6	0.01	None	522628	IMPUTE2	1000G March 2012	All ethnicities	Monomorphic	Y	SNPTEST v2	Y	Y	Y	Y	NA
Lifelines	EA	Illumina CytoSNP12 v2	Genome Studio	≥0.95	≥0.95	≥1E-5	≥0.01	IBS (IBS>0.125)	257581	IMPUTE2	1000G March 2012	All ethnicities	None	N	SNPTEST	Y	Y	N	N	First 5 PCs
MESA	EA	Affymetrix 6.0	Birdseed v1.33	≥0.95	≥0.97	≥1E-6	≥0.01	None	881666	IMPUTE2	1000G March 2012	All ethnicities	None	Y	SNPTEST v2	Y	Y	N	Y	First 2 PCs
MICROS	EA	Infinium HumanHap300 v2	BeadStudio	≥0.98	≥0.98	≥1E-6	≥0.01		292917	Minimac	1000G March 2012		Imputation quality > 01, MAF > 0.01	Y	GeneABEL, ProbABEL	Y	Y	Y	Y	No, but adjusted for kinship matrix
NEO	EA	Illumina HumanCoreExome-24v1_A Beadchip	Gencall	>0.98	>98%	>1E-5	NA	None	361046	IMPUTE	1000G March 2012	All ethnicities	None	Y	Probabel	Y	Y	Y	Y	4 PCs
ORCADES	EA	Illumina Hap300	Beadstudio using Hap300v2 cluster file	≥0.98	≥0.97	1E-6/2345	≥0.01	None	287208	IMPUTE2	1000G March 2012	All ethnicities	None	-	R, GenABEL, ProbABEL	Y	Y	N	N	First 3 PCs
PIVUS	EA	Illumina OmniExpress and Cardiometabochip	Genome Studio	≥0.95	≥95% (≥99% if MAF<0.05)	≥1E-6	0.01		738583	IMPUTE2	1000G March 2012	All ethnicities	Imputation quality ≥ 0.1	Y	SNPTEST	Y	Y	Y	Y	First 2 PCs
PREVEND	EA	Illumina CytoSNP12 v2	Genome Studio	≥0.95	≥0.95	>1E-5	≥0.01	IBS (IBS>0.125)	232571	IMPUTE2	1000G March 2012	All ethnicities	None	N	SNPTEST	Y	Y	Y	Y	First 5 PCs
PROSPER	EA	Illumina	BeadStudio	>0.95	>0.975	>1E-6	NA	None	557192	MACH	1000G March 2012	All ethnicities	None	Y	SNPTEST	Y	Y	Y	Y	First 4 PCs
RS1	EA	Illumina/HumanHap 550K DUO Illumina 610 quad	BeadStudio Genecall	≥0.975	≥0.975	≥1E-6	≥0.01		512849	MACH	1000G March 2012	All ethnicities	None	Y	mach2qtl via GRIMP	Y	Y	Y	Y	5 PCs
RS2	EA	Illumina/HumanHap 550K DUO	BeadStudio Genecall	≥ 0.975	≥0.975	≥1E-6	≥0.01		466389	MACH	1000G March 2012	All ethnicities	None	Y	mach2qtl via GRIMP	Y	Y	Y	Y	5 PCs
RS3	EA	Illumina 610 quad	BeadStudio Genecall	≥0.975	≥0.975	≥1E-6	≥0.01		466389	MACH	1000G March 2012	All ethnicities	None	Y	mach2qtl via GRIMP	Y	Y	Y	Y	5 PCs
SardiNIA	EA	Omni+Imm+Metab+Exom 1000G imput	Illumina Genome Studio	≥0.98	≥0.98	>1E-4	>0.01 for OmniExpress; >0 for the other arrays		890542	Minimac	1000G March 2012	All ethnicities	None	N	Epacts	Y	Y	N	N	NA
SHIP-0	EA	Affymetrix Genome-Wide Human SNP Array 6.0	Birdseed2	NA	≥0.8	≥1E-4	NA	Excluded duplicate samples (by IBS) or reported/genotyped gender mismatch	905910	IMPUTE2	1000G March 2012	All ethnicities	None	Y	SNPTEST v2	Y	Y	Y	Y	First 10 PCs
SHIP-T	EA	Illumina Human Omni 2.5	GenomeStudio Genotyping Module v1.0 (GenCall)	NA	≥0.8	≥1E-4	NA	Excluded duplicate samples (by IBS) or reported/genotyped gender mismatch	1824743	IMPUTE2	1000G March 2012	All ethnicities	None	Y	SNPTEST v2	Y	Y	Y	Y	First 10 PCs
TwinsUK	EA	HumanHap300, HumanHap610Q, 1M‐Duo and 1.2MDuo 1M	Illluminus calling algorithm	≥0.98	≥95%	≥1E-6	≥0.01	None	up to 874,733 SNPs depending on the dataset (HumanHap300: 303,940; HumanHap610Q: 553,487; HumanHap1M and 1.M: 874,733)	IMPUTE2	1000G June 2014	All ethnicities	None	N	GEMMA	Y	Y	N	N	NA
UK Biobank	EA	Affymetrix Axiom Array/ Affymetrix UKBiLEVE array	Affymetrix custom genotype calling pipeline (http://biobank.ndph.ox.ac.uk/showcase/refer.cgi?id=368)	>0.95	>95%	>1E-12	>0.0001	markers that failed quality control in more than one batch	670739	IMPUTE4	Haplotype Reference Consortium/UK10K and 1000G phase 3		Imputation quality > 0.3	Y	BOLT-LMM	Y	Y	Y	Y	NA
ULSAM	EA	Illunina 2.5M and Cardiometabochip	GenomeStudio	≥0.95	≥95% (≥99% if MAF<0.05)	≥1E-6	≥0.01		1621481	IMPUTE2	1000G March 2012	All ethnicities	Imputation quality ≥ 0.4	Y	SNPTEST	Y	Y	Y (males only)	Y (males only)	First 2 PCs
WHI-GARNET	EA	Illumina HumanOmni1-Quad v1-0 B	BeadStudio	≥0.98	≥0.98	≥1E-4	None		886183	BEAGLE	1000G v3.20101123		None	N	R	Y	Y	N	N	2 PCs
WHI-GECCO	EA	Cytochip 370K	BeadStudio	≥0.98	≥0.98	≥1E-4	≥0.05		251068	BEAGLE	1000G v2.20101123		None	N	R	Y	Y	N	N	2 PCs
WHI-HIPFX	EA	Illumina 550K and 610K	BeadStudio	≥0.98	≥0.98	≥1E-4	≥0.01		498871	BEAGLE	1000G v3.20101123		None	N	R	Y	Y	N	N	2 PCs
WHI-LLS	EA	HumanOmniExpressExome-8v1_B	Illumina Autocall	≥0.98	≥0.98	≥1E-4	≥0.01		719746	BEAGLE	1000G v3.20101123		None	N	R	Y	Y	N	N	2 PCs
WHI-MOPMAP	EA	Affymetrix Gene Titan, Axiom Genome-Wide Human CEU I Array Plate	Unknown	≥0.95	≥0.98	≥1E-6	≥0.005		554032	BEAGLE	1000G v3.20101123		None	N	R	Y	Y	N	N	2 PCs
WHI-WHIMS	EA	HumanOmniExpressExome-8v1_B	Illumina Autocall	≥0.97	≥0.98	≥1E-4	≥0.01		601021	BEAGLE	1000G v3.20101123		None	N	R	Y	Y	N	N	2 PCs
YFS	EA	Illumina 670k Custom	Illuminus	≥0.95	≥0.95	≥1E-6	≥0.01	None	539022	IMPUTE2	1000G March 2012	All ethnicities	None	Y	SNPTEST	Y	Y	Y	Y	4 PCs
ARIC	AA	Affymetrix 6.0	Birdseed	≥0.95	≥0.95	≥1E-5	≥0.01	None	806416	IMPUTE2	1000G March 2012	All ethnicities	Imputation quality ≥ 0.1, MAF > 0.005	N	FAST	Y	Y	Y	Y	Top 10 PCs
BioME-Omni	AA	Illumina HumanOmniExpressExome-8 v1.0	Genome Studio	≥0.98	≥0.95	≥1E-5	0	Het coef < -0.1 or > 0.3; Inbred coef 0.4 or > 0.9 for variants MAF < 1%	866864	IMPUTE2	1000G Septemer 2014	All ethnicities	Imputation quality > 0.1	N	SNPTEST, qctool	Y	Y	N	N	NA
CHS	AA	Illumina HumanOmni1-Quad_v1	Genome Studio	≥0.95	≥0.97	≥1E-5	NA	> 2 duplicate errors or Mendelian inconsistencies (for reference CEPH trios), heterozygote frequency = 0	963248	IMPUTE2	1000G March 2012	1,000 Genomes Phase I integrated variant set (NCBI build 37 / hg19) - based on data freezes from 23 Nov 2010 (low-coverage whole-genome) and 21 May 2011 (high- coverage exome); phased haplotypes released March 2012 (v3)	Variants with insufficient effective minor alleles are filtered prior to analysis. This threshold was set at 5 effective alleles. Where effective alleles is defined as MAF*sampleN*2*impQuality	Y	R	Y	Y	Y	Y	PCs 1-6
JHS	AA	Affymetrix 6.0	Birdseed	≥0.95	>95%	NA	0	Sex mismatches, sample duplications or swaps	868969	Minimac	1000G March 2012	All ethnicities	Imputation quality > 0.1	Y	EMMAX	Y	Y	Y	Y	NA
MESA	AA	Affymetrix 6.0	Birdseed v1.33	≥0.95	≥0.97	≥1E-6	≥0.01	None	881666	IMPUTE2	1000G March 2012	All ethnicities	None	Y	SNPTEST2	Y	Y	N	Y	First 2 PCs
BioME-Omni	HA	Illumina HumanOmniExpressExome-8 v1.0	Genome Studio	≥0.98	≥0.95	≥1E-5	0	Het coef < -0.1 or > 0.3; Inbred coef 0.4 or > 0.9 for variants MAF < 1%	866864	IMPUTE2	1000G Septemer 2014	All ethnicities	Imputation quality > 0.1	N	SNPTEST, qctool	Y	Y	N	N	NA
HCHSSOL	HA	Illumina HumanOmni2.5-8v1-1 + custom content	Genome Studio	≥0.98	≥0.98	≥1E-5	NA	>2 duplicate errors or > 3Mendelian inconsistencies	2232944	IMPUTE2	1000G March 2012	All ethnicities	2q(1-q)*N*oevar > 30,where q is allele freq	Y	R (GENESIS)	Y	N	N	N	PCs 1-5
Bambui	BR	Illumina HumanOmni2.5-8v1 array and HumanOmni5-4v1 array	GenomeStudio	>0.99	≥0.85	NA	≥0.000345 (excludes monomorphic SNPs)	NA	2018371	IMPUTE2	1000G Septemer 2014	All ethnicities	Imputation quality > 0.1	Y	SNPTEST v2	Y	Y	Y	Y	First 24 PCs
MESA	AS	Affymetrix 6.0	Birdseed v1.33	≥0.95	≥0.97	≥1E-6	≥0.01	None	881666	IMPUTE2	1000G March 2012	All ethnicities	None	Y	SNPTEST v2	N	Y	N	Y	First 2 PCs
