# Supplementary material for: Multi-ancestry GWAS of the electrocardiographic PR interval identifies 202 loci underlying cardiac conduction
Source: Nat Commun. 2020 May 21;11:2542. doi: 10.1038/s41467-020-15706-x (PMC7242331; doi:10.1038/s41467-020-15706-x)
Supplement: Supplementary file 5 — Supplementary Data 2 [file 41467_2020_15706_MOESM5_ESM.xlsx]

## Sheet: SD2 Study descriptive statistic
Supplementary Data 2 Description of studies contributing to PR interval meta-analyses: descriptive statistics of PR interval and covariates included in the analyses separately for each ancestry group.
BMI, body mass index; SD, standard deviation; EA, European ancestry; AA, African ancestry; HA, Hispanic ancestry; BR, Brazilians; AS, Asian ancestry.
				PR interval (ms)					Age (years)		BMI (kg/m2)		Height (cm)		RR interval (ms)
Study short name	Ancestry	Sample size include in the analyses	Sex, % females	Mean	Median	SD	Min	Max	Mean	SD	Mean	SD	Mean	SD	Mean	SD
AGES	EA	2216	64.49	170.24	166	26.33	98	304	75.93	5.33	27.04	4.44	166.18	9	926.32	155.4
AMISH	EA	1505	52	165.8	164	25.2	96	284	49.8	16.5	27.4	5	165.9	8.8	954.9	152.5
ARIC	EA	8038	54	160.2	158	23.1	88	306	54	5.7	26.8	4.7	168.6	9.4	928.1	136.5
BioME-Omni	EA	320	46.5625	163.6	162	28.5029	94	298	66.75	8.79226	26.9	5.34361	170.4	10.2764	885.1	162.579
BRIGHT	EA	1310	62.14	162.4	164	19.79	90	200	56.68	10.99	27.47	3.79	166.2	9.2	961	167.72
Broad AF (controls)	EA	3461	33.98	168.3	164	26	97	316	65.8	11.4	27.7	5	172.4	9.8	885.7	165.9
CAMP (MGH CAMP)	EA	2140	55.65	162.9	160	26.69	88	308	60.6	11.48	28.35	5.68	171.3	10.27	924.8	165.04
CHRIS	EA	4205	56	158	156	24.5	86	297	45.3	16	26	5	169	9	1009	156
CHS	EA	2974	62	166.4	163	27.9	88	311	72.1	5.3	26.3	4.4	164.4	9.3	950	150
CROATIA-Korcula	EA	293	63	160.2	159.5	24.3	105	235	54.22	13.32	27.99	4.26	146.5	8.82	929	127
CROATIA-Split	EA	347	66	82	157	22.2792	82	263	48.59	14.847	26.52	3.93866	171.3	90.9986	940	136.436
DeCODE	EA	80085	49.9	173.2	170	29	81	319	62.7	18.2	NA	NA	NA	NA	839	203
ERF	EA	1979	58.46	151.11	150	21.73	96	308	46.87	13.84	26.53	4.43	167.46	9.39	951.29	125.42
FHS	EA	7834	54	152	151	22	82	290	40	10	26	4.9	169	10	903	175
FINCAVAS-MC	EA	1215	41.5	156.51	153.5	26.97	86	292.75	55.5	13.04	27.38	4.62	170.74	9.59	841.17	165.09
GAPP	EA	1666	57	157	156	22.3	94	246	35.5	5.2	24.6	3.7	171.9	9.2	988.8	149.6
GRAPHIC	EA	941	49.5	159	158	23.8	86	316	52.8	4.4	27.3	4.2	169.5	9.2	650	97
GS-SFHS	EA	9087	59	164.1	162	24.9	86	312	52	13.6	26.95	5.15	167.7	9.55	885.8	146.06
H2000	EA	4898	55	159.2	160	21.7	88	288	50.59	13.47	26.76	4.58	168.68	9.66	482.63	77.94
INGI-CARL	EA	326	42	152	152	19.6	98	204	46.4	16	26.74	5.2	161	9.7	876	123
INGI-FVG	EA	981	58	156.6	155	22.6	98	238	50.4	16	25.09	4.37	169	8.86	937.3	159.6
KORAF3	EA	2724	52	162.8	162	20.8	95	240	55.8	12.2	27.5	4.5	168	9.4	962.4	159.9
KORAS4	EA	3457	52	162.4	160	22.2	102	316	48.4	13.6	27.1	4.6	168.4	9.4	939.8	150.1
Lifelines	EA	12823	59	157.3	155	21.8	88	248	48.4	11.2	26.3	4.2	174.4	9.2	902	147.99
MESA	EA	2620	52	164.69	162	25.19	98	308	62.75	10.15	27.8	5.12	168.93	9.7	1046.53	157.87
MICROS	EA	602	48	160.1	158	23.2	89.4	273.2	40.6	14.6	25.1	4.4	167.8	9	909.5	153.7
NEO	EA	5423	53	164	164	23.2	86	310	55.9	5.93	29.9	4.8	174	9.6	1093	181
ORCADES	EA	1785	61	164.238	162	24.7317	94	264	53.1898	14.7189	27.6417	4.92561	166.743	9.24414	1011.53	158.805
PIVUS	EA	834	51	167.25	166.4	27.64	92.7	283.4	70.19	0.176	27.13	4.35	168.98	9.205	983.18	138.81
PREVEND	EA	3377	49	159.3	158	20.91	100	247	49.3	12.3	26.1	4.24	173.7	9.08	898.4	154.7
PROSPER	EA	4227	55.5	164	160	27.9	90	300	75.3	3.3	26.8	9.4	164.8	9.4	1540	270
RS1	EA	4587	60	167	164	24.8	100	304	69.6	8.97	26.31	3.68	167	9.35	871	151
RS2	EA	1897	55	165	162	22.7	106	308	65.3	7.84	27.3	4.04	168.6	9.18	886	141.5
RS3	EA	2873	56	163	160	21	88	312	57.2	6.8	27.7	4.63	170.8	9.5	883.4	135.6
SardiNIA	EA	5799	58	154.63	160	26.57	80	300	43	17.3	25.3	4.66	160	9.02	1530	252
SHIP-0	EA	2699	50.43	152.374	150	20.2679	94	282	47.2023	15.4661	26.852	4.60305	169.43	9.49124	857.703	148.881
SHIP-T	EA	941	56.22	162.153	158	23.7046	106	280	49.6801	13.5663	27.2792	4.59665	169.752	8.95207	930.978	132.993
TwinsUK	EA	3085	95	160.3	160	22.7	101	280	55.03	12.6	26.26	4.9	162.6	7	912.4	142.3
UK Biobank	EA	60543	54.7	132.4	130	24.21	81	315	57.64	8	27.38	4.66	168.8	9.2	854.3	139.72
ULSAM	EA	594	0	182	180	32.92	120	310	70.97	0.617	26.13	3.228	174.56	5.691	715.6	119.3
WHI-GARNET	EA	3596	100	161.48	158	23.91	90	306	65.41	6.87	29.79	6.18	161.51	6.2	910.65	138.94
WHI-GECCO	EA	750	100	160.96	158	23.5	104	294	64.05	6.16	28.84	5.27	162.62	5.91	923.37	130.85
WHI-HIPFX	EA	821	100	161.03	158	24.04	104	292	67.62	6.81	27.87	5.27	161.85	6.41	920.93	133.14
WHI-LLS	EA	986	100	162.17	160	23.8	92	166	68.46	3.37	27.63	4.67	161.22	6.02	937.89	137.02
WHI-MOPMAP	EA	2011	100	160.14	158	23.24	96	186	63.13	6.63	28.71	5.91	162.67	6.31	921.21	135.4
WHI-WHIMS	EA	2011	100	161.78	160	24	86	296	67.93	5.96	28.27	5.57	161.27	6.08	919.93	137.9
YFS	EA	1725	55.1	156.75	156	22.54	86	310	41.91	5.01	26.42	4.93	172.27	9.23	1028.5	165.01
ARIC	AA	2455	62	171.6	168	26.7	86	318	53.2	5.7	29.5	5.9	168	8.9	929.6	149.6
BioME-Omni	AA	773	62.4838	161.3	158	27.4242	102	318	54.53	12.7906	30.81	7.83445	168.7	10.5616	854	167.985
CHS	AA	644	64	170.2	167.5	28.7	107	278	72.5	5.5	28.4	5.4	164.5	9.3	920	160
JHS	AA	2683	62	171.902	170	27.1372	90	314	54.1846	12.7361	32.0009	7.38676	169.21	9.39816	953.831	151.877
MESA	AA	1618	54	170.93	168	26.29	88	318	62.31	10.03	30.19	5.86	168.42	9.62	1050.21	171.45
BioME-Omni	HA	1137	60.2463	156.2	154	24.1487	88	306	57.4	14.6624	29.67	6.58488	163.8	9.81529	853.5	158.901
HCHSSOL	HA	11686	59.6	156.7	154	20.9	89	307	45.8	13.8	29.7	6	162	9.3	975.7	142.7
Bambui	BR	485	24.8	162.637	159	21.3131	117	255	68.09	6.97262	25.41	4.63416	159.9	9.47036	865.9	142.264
MESA	AS	763	51.38	165.5	162	22.09	110	264	62.45	10.4	24	3.28	161.52	8.52	1049.96	144.22
