# Supplementary material for: Multi-ancestry GWAS of the electrocardiographic PR interval identifies 202 loci underlying cardiac conduction
Source: Nat Commun. 2020 May 21;11:2542. doi: 10.1038/s41467-020-15706-x (PMC7242331; doi:10.1038/s41467-020-15706-x)
Supplement: Supplementary file 6 — Supplementary Data 3 [file 41467_2020_15706_MOESM6_ESM.xlsx]

## Sheet: SD3 GWS loci in Multi-PR
Supplementary Data 3 Previously not reported PR interval loci in the multi-ancestry meta-analysis (N = 141).
Locus ID: unique locus identifier; Nearest gene(s): Nearest annotated gene(s) to the lead variant; rsID, variant accession number; Chr, chromosome; Position, physical position in build 37; EA, effect allele; OA, other allele; EAF, effect allele frequency; N, total sample size analyzed; beta, effect estimate is milliseconds; SE, standard error; P, P-value; Phet1: P-value of heterogeneity across an…
* Missense variant or variant in high LD (r2 > 0.8) with missense or splice site variant(s).
Nearest gene(s)	rsID	Chr	Position	EA/OA	EAF	N	Beta	SE	P	PHet1	PHet2
HSPG2	rs7529220	1	22282619	C/T	0.84	293050	0.58	0.09	2.1×10-10	0.684	0.292
AIM1L	rs12031946	1	26679041	C/T	0.13	293051	0.59	0.1	2.4×10-9	0.579	0.297
MAP7D1	rs1475267	1	36620801	G/C	0.16	293050	0.5	0.09	2.1×10-8	0.732	0.87
EDN2	rs12751675	1	41955714	G/A	0.75	293050	0.56	0.08	1.8×10-13	0.813	0.659
SSBP3	rs603901	1	54741767	T/C	0.58	293051	0.43	0.06	3.3×10-11	0.295	0.319
NFIA	rs6587924	1	61895257	A/C	0.49	293051	0.35	0.06	2.7×10-8	0.466	0.872
CDC7	rs13447455	1	91966445	A/G	0.64	293051	0.38	0.07	1.7×10-8	0.566	0.617
GJA5	rs1692144	1	147281349	C/T	0.79	293051	0.65	0.08	1.7×10-16	0.871	0.061
DPT	rs531706	1	168692137	C/G	0.72	293051	0.39	0.07	3.4×10-8	0.395	0.788
PRRX1	rs61824886	1	170615660	C/G	0.85	293051	0.67	0.09	6.2×10-13	0.28	0.147
C1orf98	rs819636	1	200271408	C/T	0.33	293051	0.38	0.07	1.7×10-8	0.646	0.773
HLX	rs6678632	1	221138612	T/C	0.44	293051	0.47	0.06	4.9×10-13	0.329	0.876
ADCK3	rs3768419	1	227173477	C/G	0.48	291546	0.49	0.06	1.6×10-14	0.922	0.21
SIPA1L2	rs1285678	1	232712145	A/G	0.47	287628	0.52	0.07	2.6×10-15	0.669	0.965
RYR2	rs10802580	1	237194922	G/A	0.76	286413	0.45	0.08	6.9×10-9	0.13	0.459
SMYD3	rs28468565	1	246157144	A/G	0.66	287628	0.49	0.07	8.9×10-13	0.158	0.322
LINC01249	rs12616546	2	4824622	A/G	0.68	293051	0.53	0.07	9.2×10-15	0.227	0.777
STRN	rs17496249	2	37102249	A/G	0.55	293051	0.64	0.06	1.4×10-23	0.594	0.311
EML4	rs6728830	2	42537995	C/A	0.96	291132	1.02	0.18	1.9×10-8	0.877	0.104
EPAS1	rs11894252	2	46533376	T/C	0.42	293047	0.45	0.06	2.3×10-12	0.92	0.097
FBXO11	rs7588761	2	48150587	T/C	0.07	288153	0.75	0.13	5.3×10-9	0.344	0.796
SPTBN1	rs4519566	2	54824815	G/A	0.79	293051	0.54	0.08	4.7×10-12	0.443	0.214
LINC01812/C1D	rs7584373	2	68079211	A/G	0.35	293051	0.38	0.07	1.5×10-8	0.116	0.141
FHL2/LOC285000	rs13006682	2	106104856	C/T	0.34	293051	0.51	0.07	6.7×10-14	0.221	0.256
NCKAP5	rs17816356	2	134326085	A/C	0.05	289723	0.96	0.16	7.9×10-10	0.857	0.213
TEX41	rs76909456	2	145453968	G/A	0.24	293051	0.48	0.08	1.8×10-10	0.568	0.179
LINC01473/ZC3H15	rs138711926	2	187033804	G/A	0.04	280792	0.98	0.18	4.7×10-8	0.876	0.38
SDPR	rs58577564	2	192723128	A/T	0.1	291546	0.78	0.11	7.5×10-13	0.303	0.331
TMEM198	rs13023533*	2	220414019	T/C	0.55	293051	0.41	0.06	1.1×10-10	0.65	0.946
LSM3	rs6442433	3	14275759	C/G	0.79	291836	0.71	0.08	1.9×10-19	0.738	0.083
THRB	rs60325252	3	24465080	C/T	0.71	293051	0.75	0.07	9.1×10-27	0.142	0.343
TRAK1	rs11921457	3	42103045	T/G	0.81	292301	0.69	0.09	8.0×10-16	0.288	0.047
LAMB2	rs9865051*	3	49166069	T/C	0.78	293051	0.49	0.08	3.7×10-10	0.873	0.76
ADCY5	rs1000368	3	123117165	T/C	0.26	293051	0.43	0.07	2.5×10-9	0.152	0.495
TSC22D2	rs201481721	3	150176904	D/I	0.03	223845	1.32	0.22	1.8×10-9	0.182	0.848
RAP2B	rs4680046	3	153000092	T/C	0.49	293051	0.47	0.06	1.2×10-13	0.784	0.612
FNDC3B	rs4894803	3	171800256	G/A	0.39	293046	0.49	0.07	1.8×10-13	0.677	0.363
FGF12	rs4687352	3	192373761	A/C	0.41	293051	0.53	0.06	1.3×10-16	0.887	0.317
DLG1	rs143879787	3	196799232	I/D	0.73	226107	0.51	0.08	1.4×10-9	0.768	0.307
SRD5A3	rs77422711	4	56123105	A/G	0.02	273824	1.85	0.3	6.4×10-10	0.226	0.551
LPHN3	rs28540500	4	62409801	C/G	0.38	293051	0.42	0.07	2.4×10-10	0.42	0.987
FGF5	rs36034102	4	81202048	T/G	0.27	292217	0.43	0.07	3.5×10-9	0.136	0.58
PDLIM5	rs2172448	4	95506214	A/G	0.55	288153	0.37	0.06	9.4×10-9	0.58	0.004
SLC12A7	rs4975572	5	1054197	T/C	0.46	293051	0.62	0.07	5.5×10-21	0.7	0.128
SUB1	rs17441816	5	32629419	G/A	0.29	293051	0.51	0.07	4.7×10-13	0.177	0.415
HCN1	rs10039283	5	45864843	A/G	0.41	293051	0.64	0.06	3.2×10-23	0.185	0.34
NR2F1	rs4869412	5	92455655	G/A	0.49	293051	0.4	0.06	2.3×10-10	0.047	0.074
STARD4	rs67968533	5	111046342	C/T	0.09	293051	0.66	0.11	4.8×10-9	0.709	0.862
LOC101927421/ZNF608	rs12654442	5	124343851	T/C	0.27	293051	0.46	0.07	2.8×10-10	0.546	0.337
SLC27A6	rs2577531	5	128299279	C/T	0.59	293051	0.38	0.06	3.8×10-09	0.497	0.478
FGF18	rs78810186	5	170868622	T/C	0.11	290821	0.74	0.1	1.4×10-12	0.448	0.722
LINC01411	rs4868384	5	173779209	T/A	0.47	290336	0.47	0.06	2.5×10-13	0.601	0.995
DSP	rs72825038	6	7527269	A/G	0.09	293051	0.94	0.11	2.7×10-16	0.925	0.6
DEK	rs214502	6	18227546	A/C	0.58	291546	0.42	0.07	9.9×10-11	0.167	0.439
HDGFL1	rs6922960	6	22570189	C/T	0.28	291546	0.61	0.07	5.6×10-18	0.461	0.643
LRRC16A	rs139915396	6	25351477	I/D	0.1	226107	0.69	0.13	4.2×10-8	0.434	0.212
CDKN1A	rs730506	6	36645968	C/G	0.2	293051	0.62	0.08	6.5×10-15	0.498	0.907
TFEB	rs1015149	6	41658889	T/C	0.47	293051	0.45	0.06	1.6×10-12	0.004	7×10-4
RCAN2	rs871728	6	46452619	C/T	0.42	293051	0.52	0.07	1.3×10-15	0.89	0.96
LOC101927686	rs111739590	6	113978255	C/T	0.81	293051	0.5	0.08	1.5×10-9	0.992	0.546
TCF21	rs12190287	6	134214525	G/C	0.37	290979	0.43	0.07	2.9×10-10	0.22	0.151
RP1-155D22.1	rs206708	6	164532059	A/T	0.7	293051	0.47	0.07	1.9×10-11	0.854	0.756
GET4	rs10226357	7	925949	G/A	0.59	293050	0.39	0.07	3.1×10-9	0.445	0.463
DGKB	rs56352403	7	14453835	G/A	0.64	291623	0.56	0.07	1.4×10-16	0.8	0.965
PRPS1L1	rs6961768	7	18040476	A/C	0.43	293051	0.38	0.06	3.0×10-9	0.589	0.658
DNAH11	rs62441680*	7	21622494	C/T	0.17	293051	0.62	0.08	2.3×10-13	0.511	0.206
ELMO1	rs4720244	7	37398113	C/G	0.64	293051	0.42	0.07	3.6×10-10	0.027	0.02
SEMA3A	rs62472627	7	83998676	C/T	0.14	293051	0.61	0.09	6.7×10-11	0.011	0.503
CHRM2	rs1424569	7	136569416	C/T	0.53	293051	0.36	0.07	4.6×10-8	0.877	0.488
DLC1	rs1188285	8	13130478	C/T	0.56	293050	0.45	0.06	2.4×10-12	0.882	0.71
MTUS1	rs4921804	8	17550623	G/A	0.63	289672	0.39	0.07	4.4×10-9	0.151	0.013
XPO7	rs56317071	8	21775838	C/G	0.12	293050	0.57	0.1	1.2×10-8	0.155	0.317
RBPMS	rs4545054	8	30302465	C/T	0.49	293050	0.36	0.06	2.0×10-8	0.67	0.868
RP11-1082L8.3	rs35006907	8	125859817	A/C	0.31	293050	0.48	0.07	1.6×10-12	0.764	0.142
PTK2	rs10106406	8	142006198	C/G	0.45	282729	0.4	0.07	1.4×10-9	0.95	0.086
TRPM3	rs6560168	9	73482647	T/A	0.45	292407	0.45	0.06	2.2×10-12	0.901	0.188
SPATA31D5P/RASEF	rs7043482	9	85135915	A/C	0.65	293050	0.42	0.07	8.3×10-10	0.575	0.487
ASTN2	rs1407243	9	119314851	C/T	0.6	293051	0.37	0.06	9.1×10-9	0.13	0.538
PLPP7	rs4584185	9	134203545	C/T	0.45	278484	0.48	0.07	6.1×10-13	0.211	0.652
BEND7	rs7916672	10	13534234	T/C	0.58	293051	0.35	0.06	3.8×10-8	0.607	0.497
CCDC7	rs2947080	10	32847962	G/C	0.64	293051	0.41	0.07	4.6×10-10	0.127	0.394
CEFIP	rs10776558*	10	50510406	C/T	0.53	293050	0.42	0.06	2.8×10-11	0.652	0.834
TMEM26	rs74813029	10	63194576	A/G	0.17	293051	0.54	0.09	3.3×10-10	0.479	0.39
COL13A1	rs2642608	10	71559723	T/C	0.27	293051	0.42	0.07	3.8×10-9	0.166	0.136
ZMIZ1	rs1769758	10	80898969	T/G	0.5	267464	0.5	0.07	1.0×10-11	0.763	0.683
U3	rs117443987	10	88509088	T/A	0.92	288153	1	0.12	6.1×10-17	0.601	0.308
ADRB1	rs67234920	10	115782061	G/A	0.89	293051	0.67	0.11	2.3×10-10	0.439	0.723
FGFR2	rs2912774	10	123348662	T/G	0.42	288153	0.48	0.07	1.3×10-13	0.621	0.858
MPPED2	rs553951	11	30432176	C/T	0.73	293051	0.39	0.07	3.8×10-8	0.775	0.611
WT1	rs11031737	11	32372772	G/A	0.52	293051	0.35	0.06	4.5×10-8	0.624	0.483
PCNXL3	rs12801636	11	65391317	A/G	0.24	293051	0.41	0.07	4.1×10-8	0.149	0.945
CRYAB	rs12808601	11	111776066	G/A	0.7	293050	0.51	0.07	3.1×10-13	0.645	0.002
USP28	rs144789148	11	113666335	G/A	0.05	290495	0.96	0.17	6.4×10-9	0.336	0.515
PDE3A	rs10770646	12	20544361	T/C	0.79	288153	0.53	0.08	6.4×10-11	0.7	0.666
SSPN	rs78518764	12	26306484	T/C	0.86	293051	0.61	0.1	2.1×10-10	0.765	0.315
ARID2	rs76611452	12	46209520	T/C	0.04	286416	1.19	0.19	1.5×10-10	0.553	0.861
SRGAP1	rs17099893	12	64283014	A/G	0.06	291836	0.95	0.14	9.9×10-12	0.017	0.045
MIR6074	rs4026608	12	66394664	T/C	0.62	293051	0.38	0.07	6.5×10-9	0.108	0.685
SLC6A15	rs10862858	12	84806298	A/G	0.43	293051	0.46	0.06	1.1×10-12	0.799	0.742
HCFC2	rs2629745	12	104503806	A/G	0.88	293051	0.69	0.1	1.7×10-12	0.808	0.531
RIC8B	rs3759310	12	107166122	G/C	0.36	293051	0.56	0.07	4.5×10-17	0.88	0.604
UBE3B	rs2004359*	12	109976893	G/T	0.47	291836	0.42	0.06	5.0×10-11	0.981	0.571
TESC	rs7972416	12	117491824	A/G	0.66	293051	0.45	0.07	1.8×10-11	0.551	0.794
FREM2	rs9634754*	13	39261151	G/T	0.69	293051	0.41	0.07	4.4×10-9	0.599	0.146
FGF14	rs9513995	13	102878269	T/C	0.74	287628	0.5	0.07	2.1×10-11	0.212	0.984
ARHGEF40	rs12885183	14	21545230	G/A	0.22	283907	0.49	0.08	8.5×10-10	0.259	0.319
RP11-562L8.1	rs7146955	14	29750244	G/A	0.59	293051	0.44	0.06	6.7×10-12	0.869	0.69
AKAP6	rs3784192	14	32923336	A/G	0.2	293051	0.55	0.08	3.0×10-11	0.049	0.536
NFKBIA	rs8904	14	35871217	G/A	0.63	287252	0.4	0.07	1.6×10-9	0.256	0.954
SYNE2	rs1255908	14	64457638	T/G	0.69	291546	0.52	0.07	6.0×10-14	0.552	0.737
FLRT2	rs17712080	14	86041160	G/A	0.75	293050	0.47	0.07	2.0×10-10	0.177	0.405
RP11-1070N10.3	rs179145	14	95983975	A/G	0.38	287627	0.41	0.07	5.2×10-10	0.477	0.401
MARK3	rs3759579	14	103851272	A/G	0.41	287627	0.42	0.07	1.2×10-10	0.539	0.889
RBPMS2	rs3935716*	15	65035979	A/G	0.15	293051	0.61	0.1	1.2×10-10	0.183	0.336
CORO2B	rs11330601	15	69021265	I/D	0.55	222818	0.43	0.08	1.4×10-8	0.481	0.421
HCN4	rs8039168	15	73664723	A/T	0.83	293051	0.6	0.09	2.0×10-12	0.704	0.277
ALPK3	rs6496452	15	85372645	A/T	0.55	287628	0.55	0.06	1.3×10-17	0.522	0.461
LINC00924/NR2F2	rs62008078	15	96460899	C/T	0.44	285649	0.48	0.07	4.4×10-13	0.42	0.814
SPSB3	rs35816944*	16	1828030	G/A	0.99	247100	2.7	0.44	1.3×10-9	0.97	0.98
SRL	rs79321945	16	4282284	C/A	0.78	293051	0.5	0.08	2.1×10-10	0.962	0.473
LOC101927480/LINC02140	rs1186818	16	54598337	G/A	0.24	293051	0.43	0.07	9.0×10-9	0.91	0.488
CNOT1	rs7199856*	16	58584772	G/T	0.26	292217	0.56	0.07	8.6×10-15	0.425	0.457
LINC01082/IRF8	rs904199	16	86184639	G/A	0.08	287629	0.73	0.12	7.9×10-10	0.318	0.101
ZFPM1	rs28634651	16	88553198	T/C	0.61	261197	0.51	0.07	2.1×10-12	0.074	0.182
MINK1	rs7774	17	4801163	A/C	0.33	293051	0.43	0.07	8.6×10-10	0.272	0.859
EFCAB5	rs55866125*	17	28312993	T/C	0.52	293051	0.42	0.06	3.2×10-11	0.58	0.852
CACNA1G	rs757416	17	48666064	T/C	0.63	293051	0.69	0.07	2.5×10-25	0.159	0.132
CSHL1	rs2006122	17	61987405	T/A	0.27	293051	0.42	0.07	5.8×10-9	0.22	0.122
PRKCA	rs9909004	17	64306133	C/T	0.42	291623	0.38	0.06	2.9×10-9	0.246	0.025
AC100791.2	rs745570*	17	77781725	G/A	0.53	293051	0.35	0.06	3.4×10-8	0.413	0.519
CDH2	rs11083300	18	26339589	G/C	0.46	293050	0.35	0.06	3.8×10-8	0.332	0.058
GAREM	rs982521	18	30029141	C/T	0.18	293050	0.75	0.09	1.7×10-18	0.064	0.095
DTNA	rs1786595	18	32399259	C/T	0.74	293050	0.47	0.07	6.9×10-11	0.285	0.642
CCBE1	rs12961264	18	57138957	C/T	0.23	293050	0.51	0.08	1.1×10-11	0.344	0.549
STK11	rs3795063	19	1217560	C/G	0.65	268324	0.49	0.08	7.3×10-11	0.11	0.555
ZNF358	rs113394178	19	7581244	A/C	0.6	212667	0.46	0.08	2.1×10-8	0.356	0.751
TMEM59L	rs111551996	19	18733355	G/T	0.95	290902	0.95	0.16	8.0×10-10	0.568	0.855
RNF24/SMOX	rs16989138	20	4031653	G/A	0.43	291546	0.53	0.07	7.1×10-16	0.948	0.675
KIAA1755	rs6023939	20	36832526	C/A	0.54	293051	0.44	0.06	6.7 ×10-12	0.53	0.962
DERL3	rs2070464	22	24183875	G/A	0.38	291836	0.54	0.07	6.2 ×10-16	0.081	0.218
PHF5A	rs9607805	22	41854446	T/C	0.7	287628	0.42	0.07	5.6 ×10-9	0.952	1
