# Supplementary material for: Multi-ancestry GWAS of the electrocardiographic PR interval identifies 202 loci underlying cardiac conduction
Source: Nat Commun. 2020 May 21;11:2542. doi: 10.1038/s41467-020-15706-x (PMC7242331; doi:10.1038/s41467-020-15706-x)
Supplement: Supplementary file 7 — Supplementary Data 4 [file 41467_2020_15706_MOESM7_ESM.xlsx]

## Sheet: SD4 previously reported loci 
Supplementary Data 4 Previously reported genetic loci for PR interval.
We curated a list of 98 uncorrelated (r2<0.1) variants previously reported in the literature for their association with PR interval. Variants were identified by studies in Europeans, Africans, Asians or combined ancestries. Based on both distance (±500kb) and LD (r2>0.1) we grouped them to 64 loci (Supplementary Note). Locus ID: previously reported locus identifier; Locus: Nearest gene name repor…
Locus ID	Nearest gene(s)	rsIDs	Chromosome	Position	PMID(s)	Start position	End position
1	SKI	rs4648819	1	2204790	30046033, 30679814	1704790	2704790
2	MACF1	rs2296172	1	39835817	29748316	39335817	40335817
3	EPS15	rs7538988	1	51817541	30046033, 29748316	50143021	53539086
4	MYBPHL	rs12127701	1	109838264	30046033	109338264	110338264
5	KCND3	rs12145374	1	112480536	30679814, 24850809	111980536	113030430
		rs75013985	1	112530430	30679814
6	KRTCAP2	rs11264339	1	155140648	30046033, 29748316	154640648	156125194
7	OBSCN	rs397637	1	228453328	30046033	227953328	228953328
8	ID2	rs4399693	2	8694850	29748316	6715295	10731628
		rs3856447	2	8750266	30046033	6715295	10731628
9	SLC8A1	rs17026156	2	40760965	25035420, 25055868	39051209	42330066
10	MEIS1	rs11897119	2	66772000	20062060, 23139255, 23139255, 24850809, 30046033, 29748316, 30679814	66272000	67272000
11	TMEM182	rs2732860	2	103398334	30046033	102898334	103898334
12	FIGN	rs13018106	2	164375202	30046033	163875202	164875202
13	TTN/CCDC141	rs922984	2	179615887	30046033, 29748316	178948735	180221046
		rs17362588	2	179721046	29748316
14	EOMES	rs9826413	3	27834747	30046033	27334747	28334747
15	SCN5A/SCN10A	rs267567	3	37574024	23139255	35720014	41571567
		rs7623452	3	37616229	30679814
		rs73068693	3	37662445	29748316, 30679814
		rs73064854	3	38376872	30679814
		rs62239934	3	38497328	30679814
		rs185206204	3	38552303	30679814
		rs7373779	3	38593943	29748316, 30679814
		rs3922844	3	38624253	23139255, 24850809, 29748316, 30679814
		rs61669000	3	38632435	30679814
		rs11708996	3	38633923	20062060, 23139255, 24850809, 30046033, 30679814
		rs41312045	3	38670021	30679814
		rs62242808	3	38671021	30679814
		rs6763048	3	38681394	23139255
		rs114854018	3	38683242	30679814
		rs7373065	3	38710315	29748316, 30679814
		rs6599234	3	38715300	30679814
		rs6795970	3	38766675	20062063, 20062061, 20062060, 23139255, 23139255, 25035420, 25055868, 24850809, 30046033, 29748316, 30679814
		rs6801957	3	38767315	30679814
		rs75310964	3	38799859	30679814
		rs4369974	3	38813482	30679814
		rs9828912	3	38837009	30679814
		rs141054287	3	38861716	30679814
		rs80238762	3	39180100	29748316
		rs1768208	3	39523003	29748316
16	DCP1A/CACNA1D	rs10452033	3	53441376	25055868	52941376	53941376
17	SLC25A26	rs2030569	3	66413918	30046033	64364255	67082596
18	FRMD4B	rs900669	3	69406802	30046033	67615222	71445022
19	FOXP1	rs3732733	3	71286767	30046033	70786767	71786767
20	PDZRN3	rs13087058	3	73551228	30046033, 30679814	73051228	74051228
21	PHLDB2	rs16858828	3	111630787	30046033	111130787	112130787
22	CCNL1	rs6441111	3	156821808	30046033	156321808	157321808
23	SENP2	rs7638853	3	185350706	30046033	184850706	185850706
24	PPARGC1A	rs2970852	4	23821523	30046033	23321523	24321523
25	ARHGAP24	rs7660702	4	86651464	20062063, 20062060, 23139255, 24850809, 30046033, 29748316, 30679814	86151464	87151464
26	AFF1	rs442177	4	88030261	29748316	87530261	88530261
27	CAMK2D	rs17446418	4	114418006	30046033	113918006	114918006
28	HAND2	rs2119788	4	174447389	29748316	173947389	174947389
29	FAT1	rs3733409	4	187627593	30046033, 29748316	187127593	188127593
30	PAM	rs7729395	5	102100576	30046033, 29748316	100080327	103023337
31	NR3C1/ARHGAP26	rs17287745	5	142655015	30679814	142155015	143155015
32	NKX2-5/ATP6V0E1/C5orf41/BNIP1/CREBRF	rs251253	5	172480336	20062060, 24850809, 30046033, 29748316, 30679814	171980336	172980336
33	C6orf195	rs1254724	6	2580199	30046033	2080199	3080199
34	SLC35F1	rs11970286	6	118680374	30046033	118117189	119467763
		rs74640693	6	118684824	30679814
35	GJA1	rs9398652	6	122146034	29748316	120419664	124195875
36	TBX20/HERPUD2	rs11763856	7	35545787	30046033, 30679814	35045787	36149014
37	CAV1/CAV2	rs11772846	7	116034634	30679814	114246368	117499844
		rs3807989	7	116186241	20062063, 20062060, 23139255, 25035420, 25055868, 24850809, 30046033, 29748316, 30679814
38	MKLN1	rs2129561	7	130963771	30046033	128921711	133006034
39	FGFR1	rs881301	8	38332318	30046033	37832318	38832318
40	ZFPM2	rs12678719	8	106516054	30046033	105874406	107953589
41	KLHL38	rs4871397	8	124635197	30046033	124135197	125135197
42	PLEC	rs7002002	8	144997927	29748316	143113628	146198768
43	ZNF438	rs1771644	10	31314134	30046033	30814134	31814134
44	SYNPO2L	rs60632610	10	75415677	29748316	74915677	75915677
45	ALDH18A1/SORBS1	rs12359272	10	97365163	30046033, 29748316	95326645	98837354
46	SH3PXD2A/OBFC1	rs12257568	10	105522875	30046033	105022875	106022875
47	NAV2	rs1372797	11	20015276	30046033	19515276	20515276
48	FADS1/FADS2	rs174545	11	61569306	24850809, 30046033	59584519	63612563
49	WNT11	rs4944092	11	75909619	20062060, 30046033	75409619	76409619
50	SOX5/C12orf67/LINC00477/BCAT1	rs11047543	12	24788339	20062060, 24850809, 30046033, 29748316, 30679814	24288339	25288339
51	TBX5/TBX3	rs3825214	12	114795443	20062063, 23139255, 23139255, 30046033, 29748316	113402916	116728495
		rs1061657	12	115108136	30679814
		rs6489973	12	115156523	30679814
		rs1896312	12	115346424	20062060, 24850809, 30046033, 29748316, 30679814
		rs11067773	12	116228495	30046033
52	XPO/EFHA	rs2585897	13	21398979	24850809, 30046033, 29748316	19404976	23448969
		rs718426	13	22085659	24850809, 30046033, 30679814
53	LRCH1	rs9590974	13	47238717	24850809, 30046033, 30679814	46738717	47738717
54	CAB39L	rs11839149	13	49903334	30046033	49403334	50403334
55	ADPRHL1	rs41306688	13	114078558	29748316	113578558	114578558
56	IL25/MYH6	rs11465506	14	23842661	30046033	23342661	24342661
57	FERMT2	rs4901308	14	53379925	30046033	52485415	54003798
58	SNORD56B	rs17767398	14	71770485	30046033, 29748316, 30679814	71270485	72270485
59	TLE3	rs904974	15	70447582	30046033	69947582	70947582
60	CDH13	rs8046873	16	82751932	30046033	82251932	83251932
61	MYOCD/LINC00670	rs11078078	17	12471886	29748316	11971886	13137742
		rs1984481	17	12637742	30046033
62	TOP1	rs1006325	20	39633603	30046033	39133603	40319840
63	C20orf166	rs11906462	20	61158952	30046033	60658952	61658952
64	NCRNA00113	rs13047360	21	28851580	30046033	28351580	29351580
