# Supplementary material for: Multi-ancestry GWAS of the electrocardiographic PR interval identifies 202 loci underlying cardiac conduction
Source: Nat Commun. 2020 May 21;11:2542. doi: 10.1038/s41467-020-15706-x (PMC7242331; doi:10.1038/s41467-020-15706-x)
Supplement: Supplementary file 8 — Supplementary Data 5 [file 41467_2020_15706_MOESM8_ESM.xlsx]

## Sheet: SD5 lead SNVs in known loci
Supplementary Data 5 Most significant variants within the 64 previously reported loci for PR interval in the multi-ancestry meta-analysis.
Locus: Named according to what has been reported in the literature; Chr, chromosome; Position, physical position in build 37; EA, effect allele; OA, other allele; EAF, effect allele frequency; beta, effect estimate is milliseconds; SE, standard error; N, total sample size analyzed.
* Missense variant or variant in high LD (r2>0.8) with missense variant. Detailed annotations of all PR interval associated variants and their proxies (r2>0.8) are provided in Supplementary Data 12.
Locus ID	Locus1	chr	pos	MarkerName	rsID	EA	OA	EAF	N	beta	SE	P
1	SKI	1	2144107	1:2144107:A:G	rs2503715	G	A	0.8653	279275	1.5966	0.1055	1.071e-51
2	MACF1	1	39654372	1:39654372:C:G	rs57214150*	C	G	0.2114	293050	0.5926	0.0783	3.685e-14
3	EPS15	1	51220017	1:51220017:G:T	rs72690486	T	G	0.9751	288203	2.3075	0.2204	1.192e-25
4	MYBPHL	1	109948138	1:109948138:D:I	rs34573869	D	I	0.0651	226107	0.9757	0.1522	1.46e-10
5	KCND3	1	112560237	1:112560237:A:A	rs116532272	G	A	0.9783	272826	3.7446	0.2548	6.665e-49
6	KRTCAP2	1	155142927	1:155142927:A:G	rs4971089	A	G	0.4959	293051	0.664	0.0638	2.445e-25
7	OBSCN	1	228450868	1:228450868:A:G	rs287606	A	G	0.2891	293050	0.4386	0.0698	3.271e-10
8	ID2	2	8756183	2:8756183:C:T	rs6730558	T	C	0.3904	293051	1.1434	0.0656	5.883e-68
9	SLC8A1	2	40743183	2:40743183:A:G	rs17026114	G	A	0.075	293051	1.2275	0.1377	5.021e-19
10	MEIS1	2	66756976	2:66756976:A:G	rs3891585	A	G	0.3864	292110	1.3493	0.065	7.57e-96
11	TMEM182	2	103415494	2:103415494:A:G	rs2732814	A	G	0.4911	293051	0.771	0.0633	3.595e-34
12	FIGN	2	164347757	2:164347757:A:C	rs1531447	C	A	0.6189	293051	0.6962	0.0658	3.88e-26
13	TTN/CCDC141	2	179558366	2:179558366:C:T	rs2042995*	C	T	0.2488	291546	0.8218	0.0752	8.296e-28
14	EOMES	3	27987232	3:27987232:A:C	rs612129	A	C	0.1764	293051	0.3373	0.0855	7.918e-05
15	SCN5A/SCN10A	3	38767315	3:38767315:C:T	rs6801957	T	C	0.3991	292217	3.4865	0.0647	5.69E-634
16	DCP1A/CACNA1D	3	53770588	3:53770588:A:G	rs6800641	G	A	0.2455	293051	0.4116	0.0739	2.596e-08
17	SLC25A26	3	66362206	3:66362206:C:T	rs1084537	T	C	0.3925	293051	0.5648	0.0658	9.664e-18
18	FRMD4B	3	69402801	3:69402801:C:T	rs6795775	T	C	0.2852	288153	0.6572	0.0723	1.034e-19
19	FOXP1	3	71296578	3:71296578:C:G	rs74537277	C	G	0.0878	284167	0.8883	0.1155	1.481e-14
20	PDZRN3	3	73554922	3:73554922:A:T	rs4677294	T	A	0.6656	293051	0.8306	0.0683	4.796e-34
21	PHLDB2	3	111643561	3:111643561:C:T	rs2137897	T	C	0.2137	293051	0.6482	0.0776	6.778e-17
22	CCNL1	3	156821808	3:156821808:C:T	rs6441111	C	T	0.5087	293051	0.9675	0.0639	1.02e-51
23	SENP2	3	185351651	3:185351651:A:G	rs1816959	A	G	0.663	291623	0.4945	0.0674	2.155e-13
24	PPARGC1A	4	23826958	4:23826958:G:T	rs2970854	G	T	0.2608	293051	0.5675	0.0725	5.13e-15
25	ARHGAP24	4	86657420	4:86657420:A:T	rs2624021	T	A	0.6791	293051	1.9786	0.0695	1.73e-178
26	AFF1	4	88030261	4:88030261:G:T	rs442177	T	G	0.5892	293051	0.4296	0.0644	2.569e-11
27	CAMK2D	4	114425934	4:114425934:A:C	rs4834347	A	C	0.2494	288153	0.7834	0.0751	1.721e-25
28	HAND2	4	174458901	4:174458901:C:T	rs13131421	C	T	0.5338	293051	0.5857	0.0635	2.68e-20
29	FAT1	4	187623099	4:187623099:A:C	rs74772720*	A	C	0.1428	291836	0.7261	0.0926	4.593e-15
30	PAM	5	102128958	5:102128958:C:T	rs114555443	C	T	0.0567	285725	1.7354	0.1542	2.15e-29
31	NR3C1/ARHGAP26	5	142938663	5:142938663:A:G	rs1037100	G	A	0.5053	293050	0.4002	0.0634	2.704e-10
32	NKX2-5/ATP6V0E1/C5orf41/BNIP1/CREBRF	5	172577403	5:172577403:A:G	rs29795	A	G	0.5699	290821	1.0051	0.0643	4.708e-55
33	C6orf195	6	2575907	6:2575907:A:G	rs4959193	A	G	0.442	293051	0.4931	0.0642	1.614e-14
34	SLC35F1	6	118667522	6:118667522:C:T	rs11153730	T	C	0.5097	291623	0.9956	0.0641	2.54e-54
35	GJA1	6	122148562	6:122148562:G:A	rs763076	G	A	0.1279	293051	0.8503	0.1015	5.327e-17
36	TBX20/HERPUD2	7	35412363	7:35412363:G:T	rs340397	T	G	0.3762	293051	0.6306	0.0655	6.232e-22
37	CAV1/CAV2	7	116186241	7:116186241:A:G	rs3807989	A	G	0.4132	292217	1.9151	0.0644	2.61e-194
38	MKLN1	7	130973495	7:130973495:C:T	rs35680304	T	C	0.5777	293051	0.7603	0.0655	3.805e-31
39	FGFR1	8	38332249	8:38332249:C:T	rs881299	C	T	0.4035	293050	0.5828	0.0649	2.786e-19
40	ZFPM2	8	106347897	8:106347897:A:T	rs72671655	T	A	0.9604	284877	1.7306	0.18	6.802e-22
41	KLHL38	8	124635197	8:124635197:C:G	rs4871397	G	C	0.0641	291835	1.1865	0.1349	1.439e-18
42	PLEC	8	145018354	8:145018354:C:T	rs11786896	T	C	0.0491	260885	1.0946	0.1643	2.687e-11
43	ZNF438	10	31324285	10:31324285:A:G	rs793090	G	A	0.6741	293051	0.2615	0.0674	0.0001048
44	SYNPO2L	10	75421446	10:75421446:C:T	rs7394152	C	T	0.8467	293051	0.7932	0.0883	2.635e-19
45	ALDH18A1/SORBS1	10	97388579	10:97388579:C:T	rs10882644	T	C	0.3756	293051	0.7597	0.0659	8.851e-31
46	SH3PXD2A/OBFC1	10	105524081	10:105524081:C:T	rs10883908	T	C	0.4096	293051	0.9787	0.0645	5.443e-52
47	NAV2	11	20010351	11:20010351:A:G	rs2625322	G	A	0.7726	293050	0.5215	0.0755	4.941e-12
48	FADS1/FADS2	11	61602458	11:61602458:D:I	rs138766446	I	D	0.7348	220072	0.6238	0.094	3.144e-11
49	WNT11	11	75915139	11:75915139:A:G	rs94111	G	A	0.6388	293051	0.4198	0.0661	2.126e-10
50	SOX5/C12orf67/LINC00477/BCAT1	12	24784139	12:24784139:A:G	rs4246224	G	A	0.8553	293050	2.2721	0.0907	1.69e-138
51	TBX5/TBX3	12	115349497	12:115349497:C:T	rs1124477	T	C	0.3102	293051	1.2151	0.0691	2.773e-69
52	XPO4/EFHA1	13	22103294	13:22103294:A:G	rs12869776	A	G	0.5976	293051	0.9825	0.065	1.232e-51
53	LRCH1	13	47244162	13:47244162:A:G	rs4245338	G	A	0.3528	293051	0.8203	0.0663	4.029e-35
54	CAB39L	13	49918175	13:49918175:G:T	rs35214871	T	G	0.1485	293051	0.7172	0.0923	7.626e-15
55	ADPRHL1	13	114078558	13:114078558:A:C	rs41306688*	C	A	0.0467	264029	1.6546	0.1851	3.9e-19
56	IL25/MYH6	14	23904988	14:23904988:C:T	rs2754171	C	T	0.9759	260770	4.2627	0.2729	5.226e-55
57	FERMT2	14	53321273	14:53321273:C:T	rs62003514	C	T	0.8198	227610	0.6815	0.0967	1.846e-12
58	SNORD56B	14	71983638	14:71983638:C:T	rs61989382	C	T	0.2459	293051	0.8629	0.0736	1.011e-31
59	TLE3	15	70446998	15:70446998:A:C	rs2004851	A	C	0.3253	283907	0.6339	0.0705	2.421e-19
60	CDH13	16	82754425	16:82754425:C:G	rs12443745	C	G	0.9091	282730	0.9432	0.1146	1.891e-16
61	LINC00670/MYOCD	17	12635871	17:12635871:A:G	rs35712872	G	A	0.2451	293051	1.1944	0.0768	1.712e-54
62	TOP1	20	40066117	20:40066117:A:T	rs2179452	T	A	0.8003	293051	0.4605	0.0819	1.897e-08
63	C20orf166	20	61178671	20:61178671:C:T	rs28414612	T	C	0.7529	280491	0.5666	0.0785	5.161e-13
64	NCRNA00113	21	28870626	21:28870626:C:T	rs956645	T	C	0.0319	284692	0.9651	0.2067	3.023e-06
