# Supplementary material for: Multi-ancestry GWAS of the electrocardiographic PR interval identifies 202 loci underlying cardiac conduction
Source: Nat Commun. 2020 May 21;11:2542. doi: 10.1038/s41467-020-15706-x (PMC7242331; doi:10.1038/s41467-020-15706-x)
Supplement: Supplementary file 9 — Supplementary Data 6 [file 41467_2020_15706_MOESM9_ESM.xlsx]

## Sheet: SD6 GWS loci in EUR-PR
Supplementary Data 6 Genome-wide significant loci (N=127) not previously reported with PR interval identified by the European GWAS meta-analysis.
There was no evidence of heterogeneity for any of the newly identified loci across individual studies (Pheterogeneity > 0.001).
Chr, chromosome; Position, physical position in build 37; EA, effect allele; OA, other allele; EAF, effect allele frequency; N, total sample size analyzed; beta, effect estimate in milliseconds; SE, standard error; P, P-value; R2, R2 between the lead variants from the European and the multi-ancestry meta-analyses; r2 is not provided for the same variants between the two meta-analyses.
* Locus reached borderline genome-wide significance (P<9.1×10-7) in the multi-ancestry meta-analysis of absolute PR interval; all other loci were genome-wide significant (P<5×10-8).
Nearest gene	Chr	Position	MarkerName	rsID	EA	OA	EAF	N	beta	SE	P	R2
HSPG2	1	22283991	1:22283991:A:C	rs4655001	A	C	0.882	271570	0.5825	0.1046	2.531e-08	0.859346
AIM1L	1	26619989	1:26619989:C:T	rs10794527	T	C	0.0766	271570	0.7518	0.127	3.268e-09	0.621008
MAP7D1	1	36685738	1:36685738:A:G	rs500555	A	G	0.2869	268281	0.4503	0.0791	1.25e-08	0.194765
EDN2	1	41955714	1:41955714:A:G	rs12751675	G	A	0.7498	271570	0.5685	0.0778	2.762e-13	-
SSBP3	1	54726088	1:54726088:A:C	rs702496	C	A	0.5509	271570	0.4076	0.0673	1.372e-09	0.851098
CDC7	1	91941500	1:91941500:A:G	rs66507060	G	A	0.6454	271570	0.4134	0.0694	2.55e-09	0.631718
GJA5	1	147281349	1:147281349:C:T	rs1692144	C	T	0.791	271570	0.6416	0.0816	3.677e-15	-
PRRX1	1	170615724	1:170615724:A:T	rs61824887	A	T	0.8711	271570	0.7402	0.1003	1.583e-13	1
C1orf98	1	200271408	1:200271408:C:T	rs819636	C	T	0.3269	271570	0.3993	0.0711	1.951e-08	-
HLX	1	221138612	1:221138612:C:T	rs6678632	T	C	0.4278	271570	0.4477	0.0672	2.615e-11	-
ADCK3	1	227174145	1:227174145:C:T	rs7552783	C	T	0.4953	270065	0.5041	0.0663	2.91e-14	0.987589
SIPA1L2	1	232690086	1:232690086:A:G	rs2243857	A	G	0.4639	266147	0.5267	0.0691	2.546e-14	0.858746
RYR2	1	237194922	1:237194922:A:G	rs10802580	G	A	0.7679	264932	0.4732	0.0818	7.32e-09	-
SMYD3	1	246157144	1:246157144:A:G	rs28468565	A	G	0.6833	266147	0.5375	0.0721	9.083e-14	-
LINC01249	2	4824073	2:4824073:A:G	rs1470475	G	A	0.6884	271570	0.5208	0.0711	2.477e-13	1
STRN	2	37102249	2:37102249:A:G	rs17496249	A	G	0.5424	271570	0.6563	0.0666	6.271e-23	-
EML4	2	42537995	2:42537995:A:C	rs6728830	C	A	0.9638	270295	1.0273	0.1842	2.428e-08	-
EPAS1	2	46541176	2:46541176:C:T	rs11689011	T	C	0.4155	271570	0.4488	0.0672	2.384e-11	0.978858
SPTBN1	2	54882381	2:54882381:A:G	rs2271329	G	A	0.7994	271570	0.5804	0.0831	2.864e-12	0.816291
FHL2 - LOC285000	2	106104856	2:106104856:C:T	rs13006682	C	T	0.3376	271570	0.4749	0.071	2.267e-11	-
NCKAP5	2	134326085	2:134326085:A:C	rs17816356	A	C	0.0552	271570	0.9423	0.1588	2.935e-09	-
TEX41	2	145453968	2:145453968:A:G	rs76909456	G	A	0.2417	271570	0.4687	0.0777	1.58e-09	-
SDPR	2	192723128	2:192723128:A:T	rs58577564	A	T	0.0953	270065	0.7321	0.1159	2.712e-10	-
BMPR2*	2	203373030	2:203373030:A:G	rs2103208	G	A	0.4938	271570	0.3628	0.0664	4.756e-08	-
AC007563.5*	2	217628087	2:217628087:C:T	rs6435953	C	T	0.1621	271570	0.5067	0.0904	2.083e-08	-
TMEM198	2	220414019	2:220414019:C:T	rs13023533	T	C	0.5482	271570	0.405	0.067	1.498e-09	-
LSM3	3	14280870	3:14280870:G:T	rs4685090	G	T	0.7817	270355	0.684	0.0806	2.13e-17	1
THRB	3	24464955	3:24464955:A:G	rs59212267	G	A	0.7027	271570	0.7813	0.0725	4.268e-27	1
TRAK1	3	42103045	3:42103045:G:T	rs11921457	T	G	0.8079	270820	0.7337	0.0889	1.497e-16	-
LAMB2	3	49544229	3:49544229:A:G	rs56324858	A	G	0.7746	271570	0.4756	0.0802	2.976e-09	0.926938
TSC22D2	3	150176904	3:150176904:D:I	rs201481721	D	I	0.0334	204626	1.3068	0.229	1.152e-08	-
RAP2B	3	153000092	3:153000092:C:T	rs4680046	T	C	0.4853	271570	0.4833	0.0662	2.817e-13	-
MLF1*	3	158333891	3:158333891:A:G	rs6799180	A	G	0.4714	271570	0.3705	0.0662	2.17e-08	-
FNDC3B	3	171800256	3:171800256:A:G	rs4894803	G	A	0.3931	271565	0.4937	0.0686	6.209e-13	-
FGF12	3	192373761	3:192373761:A:C	rs4687352	A	C	0.4012	271570	0.5269	0.0673	4.896e-15	-
DLG1	3	196799232	3:196799232:D:I	rs143879787	I	D	0.7258	204626	0.5103	0.088	6.661e-09	-
SRD5A3	4	56123105	4:56123105:A:G	rs77422711	A	G	0.0169	262138	1.7959	0.302	2.748e-09	-
LPHN3	4	62409801	4:62409801:C:G	rs28540500	C	G	0.3797	271570	0.4081	0.0685	2.513e-09	-
FGF5	4	81202048	4:81202048:G:T	rs36034102	T	G	0.2688	270736	0.4428	0.0756	4.671e-09	-
PDLIM5	4	95506214	4:95506214:A:G	rs2172448	A	G	0.5494	266672	0.3913	0.0673	6.231e-09	-
MYOZ2*	4	120070079	4:120070079:A:T	rs78277783	A	T	0.2705	266672	0.4232	0.0755	2.056e-08	-
SLC12A7	5	1066400	5:1066400:A:G	rs182271072	A	G	0.9853	245787	3.0046	0.336	3.858e-19	0.00203627
SUB1	5	32616255	5:32616255:C:T	rs922000	T	C	0.3126	271569	0.4784	0.0714	2.115e-11	0.904872
HCN1	5	45864843	5:45864843:A:G	rs10039283	A	G	0.4001	271570	0.6318	0.0677	1.045e-20	-
NR2F1	5	92455655	5:92455655:A:G	rs4869412	G	A	0.4743	271570	0.4294	0.0661	8.059e-11	-
FER*	5	108210304	5:108210304:A:G	rs6889995	G	A	0.2205	266672	0.4443	0.0811	4.304e-08	-
STARD4	5	111046342	5:111046342:C:T	rs67968533	C	T	0.0882	271570	0.7005	0.1178	2.727e-09	-
LOC101927421 - ZNF608	5	124351539	5:124351539:A:G	rs6883400	A	G	0.2442	265771	0.4818	0.0775	4.994e-10	0.988789
FGF18	5	170868622	5:170868622:C:T	rs78810186	T	C	0.1116	271250	0.7862	0.1088	4.967e-13	-
LINC01411	5	173779209	5:173779209:A:T	rs4868384	T	A	0.4635	271250	0.4594	0.0666	5.19e-12	-
DSP	6	7518915	6:7518915:C:T	rs112019128	T	C	0.0932	271570	0.9414	0.118	1.475e-15	0.936855
DEK	6	18227546	6:18227546:A:C	rs214502	A	C	0.592	270065	0.4234	0.0681	5.187e-10	-
HDGFL1	6	22570245	6:22570245:A:G	rs6900627	A	G	0.2712	270065	0.5857	0.0747	4.371e-15	0.970616
CDKN1A	6	36647289	6:36647289:A:G	rs3176326	A	G	0.2008	271570	0.5993	0.084	9.732e-13	0.966237
TFEB	6	41658889	6:41658889:C:T	rs1015149	T	C	0.4688	271570	0.4463	0.0668	2.325e-11	-
RCAN2	6	46472377	6:46472377:A:G	rs4585546	G	A	0.3975	271570	0.5201	0.0676	1.471e-14	0.764996
LOC101927686	6	113973847	6:113973847:C:T	rs56313227	C	T	0.8139	271570	0.5012	0.0859	5.348e-09	0.982224
TCF21	6	134214525	6:134214525:C:G	rs12190287	G	C	0.3742	270142	0.3925	0.07	2.072e-08	-
RP1-155D22.1	6	164528867	6:164528867:A:T	rs206705	T	A	0.6938	271570	0.4797	0.0723	3.358e-11	0.957711
GET4	7	925949	7:925949:A:G	rs10226357	G	A	0.5908	271569	0.4107	0.0682	1.689e-09	-
DGKB	7	14453835	7:14453835:A:G	rs56352403	G	A	0.6409	270142	0.5747	0.0701	2.452e-16	-
PRPS1L1	7	18040476	7:18040476:A:C	rs6961768	A	C	0.4249	271570	0.4082	0.0675	1.492e-09	-
DNAH11	7	21617089	7:21617089:G:T	rs7803297	T	G	0.172	271570	0.5955	0.0881	1.394e-11	0.978943
SEMA3A	7	83998676	7:83998676:C:T	rs62472627	C	T	0.1448	271570	0.5902	0.095	5.226e-10	-
DLC1	8	13130478	8:13130478:C:T	rs1188285	C	T	0.5583	271570	0.4593	0.0667	5.615e-12	-
MTUS1	8	17550623	8:17550623:A:G	rs4921804	G	A	0.6226	268192	0.4138	0.0693	2.374e-09	-
AZIN1*	8	103914366	8:103914366:A:C	rs565720	A	C	0.7709	271570	0.4359	0.0787	3.113e-08	-
RP11-1082L8.3	8	125867834	8:125867834:A:T	rs55679363	T	A	0.3196	271570	0.505	0.0711	1.209e-12	1
PTK2	8	142006198	8:142006198:C:G	rs10106406	C	G	0.4325	261249	0.4086	0.069	3.234e-09	-
TRPM3	9	73496967	9:73496967:G:T	rs17471974	G	T	0.1789	271570	0.5738	0.0874	5.091e-11	0.115392
RP11-15B24.5	9	85135915	9:85135915:A:C	rs7043482	A	C	0.672	271569	0.4364	0.0718	1.214e-09	-
PLPP7	9	134203545	9:134203545:C:T	rs4584185	C	T	0.44	257003	0.4851	0.0703	5.327e-12	-
CCDC7	10	32847962	10:32847962:C:G	rs2947080	G	C	0.6433	271570	0.389	0.0689	1.679e-08	-
CEFIP	10	50510406	10:50510406:C:T	rs10776558	C	T	0.5262	271570	0.4062	0.0663	8.874e-10	-
TMEM26	10	63227521	10:63227521:A:T	rs2393843	A	T	0.1771	271570	0.5569	0.0873	1.766e-10	0.928141
COL13A1	10	71559723	10:71559723:C:T	rs2642608	T	C	0.2769	271570	0.4485	0.0738	1.21e-09	-
ZMIZ1	10	80898969	10:80898969:G:T	rs1769758	T	G	0.4967	245983	0.5088	0.0769	3.764e-11	-
U3	10	88509088	10:88509088:A:T	rs117443987	T	A	0.9148	266672	0.9744	0.122	1.372e-15	-
ADRB1	10	115782061	10:115782061:A:G	rs67234920	G	A	0.9032	271570	0.6188	0.1126	3.84e-08	-
FGFR2	10	123348662	10:123348662:G:T	rs2912774	T	G	0.4139	266672	0.4963	0.0684	4.063e-13	-
CRYAB	11	111773296	11:111773296:C:T	rs11214037	C	T	0.717	271570	0.497	0.0741	2.011e-11	0.96472
USP28	11	113666335	11:113666335:A:G	rs144789148	G	A	0.0476	271277	1.0094	0.1683	1.985e-09	-
PDE3A	12	20531641	12:20531641:C:T	rs1348581	T	C	0.8004	271568	0.574	0.0827	3.965e-12	0.792778
SSPN	12	26306484	12:26306484:C:T	rs78518764	T	C	0.8537	271570	0.5921	0.0976	1.299e-09	-
ARID2	12	46209520	12:46209520:C:T	rs76611452	T	C	0.0413	267970	1.1431	0.1894	1.581e-09	-
SRGAP1	12	64284283	12:64284283:A:G	rs4346062	G	A	0.0559	270354	0.9548	0.1462	6.588e-11	1
MIR6074	12	66404624	12:66404624:C:T	rs10878359	C	T	0.6347	271570	0.392	0.0687	1.161e-08	0.917318
SLC6A15	12	84923377	12:84923377:A:G	rs2468307	A	G	0.4295	271570	0.4815	0.0671	7.043e-13	0.930485
HCFC2	12	104503806	12:104503806:A:G	rs2629745	A	G	0.8774	271570	0.6788	0.1017	2.519e-11	-
RIC8B	12	107101685	12:107101685:C:T	rs10161520	C	T	0.3477	271570	0.5592	0.0697	1.015e-15	0.979167
UBE3B	12	109982535	12:109982535:A:G	rs7953327	G	A	0.8298	270736	0.5522	0.0878	3.146e-10	0.189761
TESC	12	117484062	12:117484062:A:G	rs7953553	G	A	0.6558	268485	0.4299	0.0702	8.895e-10	0.966689
FREM2	13	39261151	13:39261151:G:T	rs9634754	G	T	0.7068	271570	0.429	0.073	4.225e-09	-
FGF14	13	102878269	13:102878269:C:T	rs9513995	T	C	0.7386	266147	0.4686	0.0766	9.681e-10	-
ARHGEF40	14	21542766	14:21542766:A:G	rs12889267	G	A	0.1662	262426	0.5196	0.0936	2.795e-08	0.621718
RP11-562L8.1	14	29772185	14:29772185:G:T	rs10162525	T	G	0.5934	271570	0.4309	0.0676	1.8e-10	1
AKAP6	14	32923677	14:32923677:C:T	rs3825751	T	C	0.1791	271570	0.5411	0.0862	3.442e-10	1
NFKBIA	14	35871093	14:35871093:C:T	rs696	C	T	0.6309	265771	0.4438	0.0699	2.124e-10	0.991009
SYNE2	14	64457638	14:64457638:G:T	rs1255908	T	G	0.692	270065	0.5374	0.0719	7.897e-14	-
FLRT2	14	86041160	14:86041160:A:G	rs17712080	G	A	0.7472	271570	0.4844	0.0767	2.744e-10	-
RP11-1070N10.3	14	95983898	14:95983898:A:T	rs179146	T	A	0.2731	266147	0.4761	0.0758	3.35e-10	0.559053
MARK3	14	103989892	14:103989892:A:C	rs3759582	C	A	0.1371	263062	0.5869	0.0989	2.947e-09	0.172379
RBPMS2	15	65035979	15:65035979:A:G	rs3935716	A	G	0.1233	271570	0.6188	0.1012	9.628e-10	-
CORO2B	15	69021265	15:69021265:D:I	rs11330601	I	D	0.5324	201337	0.4575	0.0793	7.918e-09	-
HCN4	15	73664723	15:73664723:A:T	rs8039168	A	T	0.8422	271570	0.6032	0.0903	2.401e-11	-
ALPK3	15	85372645	15:85372645:A:T	rs6496452	A	T	0.557	266147	0.5497	0.0674	3.302e-16	-
LINC00924 - NR2F2	15	96460899	15:96460899:C:T	rs62008078	C	T	0.4469	264168	0.4784	0.0684	2.724e-12	-
SPSB3	16	1828030	16:1828030:A:G	rs35816944	G	A	0.9917	234277	2.7029	0.4551	2.858e-09	-
SRL	16	4323967	16:4323967:C:T	rs3747570	T	C	0.7573	263736	0.4769	0.0793	1.819e-09	0.527636
MYH11*	16	15834729	16:15834729:C:T	rs72772025	T	C	0.2739	269591	0.4135	0.075	3.522e-08	-
CNOT1	16	58584772	16:58584772:G:T	rs7199856	G	T	0.2599	270736	0.5313	0.0755	1.933e-12	-
LINC01082 - IRF8	16	86122524	16:86122524:A:G	rs13336880	A	G	0.2252	263062	0.4883	0.0852	9.944e-09	0.000368587
ZFPM1	16	88508781	16:88508781:C:G	rs8045886	C	G	0.7322	250320	0.5373	0.0816	4.535e-11	0.368669
MINK1	17	4801163	17:4801163:A:C	rs7774	A	C	0.3274	271570	0.4572	0.0727	3.112e-10	-
EFCAB5	17	28531258	17:28531258:C:T	rs3794809	C	T	0.5584	271570	0.4463	0.0669	2.533e-11	0.858984
CACNA1G	17	48666064	17:48666064:C:T	rs757416	T	C	0.6443	271570	0.7115	0.0691	7.534e-25	-
CSHL1	17	61993137	17:61993137:A:G	rs3020619	G	A	0.2715	271570	0.434	0.0752	7.995e-09	0.962761
CASKIN2*	17	73505172	17:73505172:A:G	rs7501873	G	A	0.2223	271570	0.4518	0.0828	4.89e-08	-
GAREM	18	30020075	18:30020075:C:T	rs17744051	C	T	0.1589	271568	0.6857	0.0906	3.713e-14	0.977845
DTNA	18	32409571	18:32409571:C:T	rs1790534	T	C	0.7325	271570	0.4962	0.0747	3.058e-11	0.984309
CCBE1	18	57138957	18:57138957:C:T	rs12961264	C	T	0.2269	271570	0.5413	0.079	7.216e-12	-
STK11	19	1217560	19:1217560:C:G	rs3795063	C	G	0.643	251144	0.5192	0.0779	2.693e-11	-
TMEM59L	19	18733355	19:18733355:G:T	rs111551996	G	T	0.9493	270065	0.9624	0.1594	1.582e-09	-
RNF24 - SMOX	20	4031866	20:4031866:C:G	rs6084574	C	G	0.4992	271570	0.5325	0.0673	2.402e-15	0.752623
KIAA1755	20	36841914	20:36841914:A:G	rs3746471	G	A	0.5351	271570	0.4636	0.0667	3.53e-12	0.913981
DERL3	22	24152671	22:24152671:C:T	rs12172023	T	C	0.1214	266672	0.8107	0.103	3.507e-15	0.145712
PHF5A	22	41854446	22:41854446:C:T	rs9607805	T	C	0.7306	266147	0.4352	0.0764	1.199e-08	-
