# Supplementary material for: Multi-ancestry GWAS of the electrocardiographic PR interval identifies 202 loci underlying cardiac conduction
Source: Nat Commun. 2020 May 21;11:2542. doi: 10.1038/s41467-020-15706-x (PMC7242331; doi:10.1038/s41467-020-15706-x)
Supplement: Supplementary file 10 — Supplementary Data 7 [file 41467_2020_15706_MOESM10_ESM.xlsx]

## Sheet: SD7 GWS in PR_AFR & PR_HIS
Supplementary Data 7 Genome-wide significant loci in the African (a) and Hispanic (b) ancestry meta-analyses of absolute PR interval.
Locus ID: unique locus identifier; Chr, chromosome; Position, physical position in build 37; EA, effect allele; OA, other allele; EAF, effect allele frequency; N, total sample size analyzed; beta, effect estimate is milliseconds; SE, standard error; P: p-value; beta_GC: beta after genomic control; SE_GC: SE after genomic control; P_GC: P after genomic control.
*Also identified as a significant locus using INVN-PR interval
**Association identified for INVN-PR. interval, r2=0.6185 with rs2384407 (locus identified for absolute PR interval)
Locus ID	Nearest gene	Reported variant	chr	pos	MarkerName	rsID	EA	OA	EAF	N	beta	SE	P	beta_GC	SE_GC	P_GC
(a) African ancestry
Previously reported loci
10	MEIS1	2:66772000	2	66756413	2:66756413	rs11677371*	A	G	0.4732	8173	2.3863	0.4104	6.06e-09	2.3863	0.43	3.28e-08
15	SCN5A/SCN10A	3:38624253	3	38624253	3:38624253	rs3922844*	C	T	0.4128	8173	5.2151	0.4245	1.095e-34	5.2151	0.45	1.71e-31
51	TBX5/TBX3	12:114795443	12	114789226	12:114789226	rs2384407	G	A	0.4291	8173	2.8328	0.4182	1.261e-11	2.8328	0.44	1.22e-10
51	TBX5/TBX3	12:114795443	12	114793240	12:114793240	rs883079**	C	T	0.338	8173	0.1153	0.0166	3.819e-12	0.12	0.02	3.89e-11
(b) Hispanic ancestry
Previously reported loci
15	SCN5A/SCN10A	3:38767315	3	38767315	3:38767315	rs6801957	T	C	0.3767	12823	3.7658	0.2677	6.166e-45
25	ARHGAP24	4:86651464	4	86699726	4:86699726	rs13105921	A	C	0.3987	12823	2.0123	0.2913	4.905e-12
37	CAV1/CAV2	7:116186241	7	116186241	7:116186241	rs3807989	A	G	0.4139	12823	2.1013	0.2695	6.379e-15
50	SOX5/C12orf67/LINC00477/BCAT1	12:24788339	12	24776752	12:24776752	rs137913153	A	G	0.8563	12823	2.7717	0.3723	9.75e-14
