# Supplementary material for: Multi-ancestry GWAS of the electrocardiographic PR interval identifies 202 loci underlying cardiac conduction
Source: Nat Commun. 2020 May 21;11:2542. doi: 10.1038/s41467-020-15706-x (PMC7242331; doi:10.1038/s41467-020-15706-x)
Supplement: Supplementary file 11 — Supplementary Data 8 [file 41467_2020_15706_MOESM11_ESM.xlsx]

## Sheet: SD8 GWS loci across MAs
Supplementary Data 8 Genome-wide significant loci reporting across the meta-analyses of absolute PR interval and rank-based inverse normal transformed PR interval residuals.
Meta-analysis: Results are presented for the lead variant of the locus in the discovery meta-analysis. We are reporting 141 previously not reported loci that reached genome-wide significance in our primary meta-analysis. We are also reporting loci that reached genome-wide significance in our secondary meta-analyses (ancestry specific that were not previously reported. For the 64 previously report…
* Locus reached genome-wide significance, but another lead variant was observed.
Chr, chromosome; Position, physical position in build 37; EA, effect allele; OA, other allele; EAF, effect allele frequency; N, total sample size analyzed; beta, effect estimate; SE, standard error; P, P-value. PR_MULTI: Multi-ancestry meta-analysis of absolute PR itnerval; PR_EUR: European ancestry meta-analysis of absolute PR itnerval; PR_AA: African ancestry meta-analysis of absolute PR itnerv…
									Meta-analysis of absolute PR interval																				Meta-analyses of rank-based inverse normal transformed PR interval
									Multi-ancestry					European ancestry					African ancestry					Hispanic ancestry					Multi-ancestry					European ancestry
Locus ID	Nearest gene	Meta analysis	Chr	Position	rsID	MarkerName	EA	OA	EAF	N	beta	SE	P	EAF	N	beta	SE	P	EAF	NA	beta	SE	P	EAF	N	beta	SE	P	EAF	N	beta	SE	P	EAF	N	beta	SE	P
141 novel loci from multi-ancestry and 8 European meta-analyses of absolute PR interval
1	HSPG2	PR_MULTI	1	22282619	rs7529220	1:22282619:C:T	C	T	0.843	293050	0.5774	0.0909	2.149e-10	0.8621	271570	0.5399	0.0973	2.903e-08	0.5689	8173	0.6537	0.423	0.1223	0.7938	12822	0.9521	0.3256	0.00345	0.8415	282128	0.0258	0.0042	6.51e-10	0.8629	271570	0.0253	0.0044	6.487e-09
2	AIM1L	PR_MULTI	1	26679041	rs12031946	1:26679041:C:T	C	T	0.1291	293051	0.5931	0.0993	2.371e-09	0.1155	271571	0.6178	0.1058	5.216e-09	0.9093	8173	0.0124	0.7523	0.9868	0.258	12822	0.4279	0.3171	0.1773	0.1184	282129	0.0277	0.0046	2.441e-09	0.115	271571	0.0274	0.0047	7.366e-09
3	MAP7D1	PR_MULTI	1	36620801	rs1475267	1:36620801:C:G	G	C	0.1621	293050	0.4985	0.0889	2.051e-08	0.1656	271570	0.5106	0.0914	2.318e-08	0.0612	8173	0.1368	0.9198	0.8817	0.1085	12822	0.4111	0.43	0.3391	0.1645	282128	0.0216	0.004	9.69E-08*	0.1662	271570	0.0224	0.0041	4.396e-08
4	EDN2	PR_MULTI	1	41955714	rs12751675	1:41955714:A:G	G	A	0.7549	293050	0.5572	0.0757	1.799e-13	0.7498	271570	0.5685	0.0778	2.762e-13	0.9274	8173	0.82	0.8368	0.3272	0.8307	12822	0.2414	0.3611	0.5038	0.7514	282128	0.0265	0.0034	1.384e-14	0.7487	271570	0.026	0.0035	6.837e-14
5	SSBP3	PR_MULTI	1	54741767	rs603901	1:54741767:C:T	T	C	0.5762	293051	0.4301	0.0649	3.304e-11	0.5672	271570	0.4034	0.0673	2.061e-09	0.7463	8173	1.2745	0.4818	0.00817	0.6801	12823	0.6456	0.2867	0.02434	0.5723	282128	0.0194	0.003	5.291e-11	0.567	271570	0.0184	0.003	9.391e-10
6	NFIA	PR_MULTI	1	61895257	rs6587924	1:61895257:A:C	A	C	0.4931	293051	0.3534	0.0635	2.678e-08	0.5039	271570	0.3286	0.0661	6.761e-07	0.3009	8173	0.6162	0.4513	0.1722	0.3841	12823	0.7103	0.2713	0.008843	0.4961	282128	0.0152	0.0029	1.717e-07	0.5029	271570	0.015	0.003	4.467e-07
7	CDC7	PR_MULTI	1	91966445	rs13447455	1:91966445:A:G	A	G	0.6375	293051	0.3792	0.0672	1.666e-08	0.6286	271570	0.3921	0.069	1.343e-08	0.9027	8173	0.3749	0.7374	0.6111	0.7812	12823	0.1825	0.3275	0.5773	0.6327	282128	0.0168	0.0031	3.718e-08	0.6285	271570	0.0174	0.0031	1.852e-08
8	GJA5	PR_MULTI	1	147281349	rs1692144	1:147281349:C:T	C	T	0.7939	293051	0.6503	0.0789	1.735e-16	0.791	271570	0.6416	0.0816	3.677e-15	0.7705	8173	1.0741	0.5018	0.03231	0.8822	12823	0.6059	0.4097	0.1391	0.7915	282128	0.0291	0.0036	4.589e-16	0.7918	271570	0.0288	0.0037	4.053e-15
9	DPT	PR_MULTI	1	168692137	rs531706	1:168692137:C:G	C	G	0.7176	293051	0.39	0.0707	3.43e-08	0.7323	271570	0.3841	0.0744	2.437e-07	0.5062	8173	0.8585	0.4155	0.03882	0.611	12823	0.2042	0.2746	0.457	0.7211	282128	0.0168	0.0032	2.011e-07	0.7323	271570	0.0167	0.0033	4.955e-07
10	PRRX1	PR_MULTI	1	170615660	rs61824886	1:170615660:C:G	C	G	0.8542	293051	0.6719	0.0934	6.2e-13	0.8709	271570	0.7324	0.1003	2.821e-13	0.7952	8173	0.1474	0.5161	0.7752	0.7268	12823	0.265	0.2991	0.3756	0.866	282128	0.0312	0.0043	6.374e-13	0.8706	271570	0.0315	0.0045	2.114e-12
11	C1orf98	PR_MULTI	1	200271408	rs819636	1:200271408:C:T	C	T	0.326	293051	0.3845	0.0681	1.679e-08	0.3269	271570	0.3993	0.0711	1.951e-08	0.2884	8173	0.6694	0.4822	0.1651	0.3237	12823	0.0698	0.2807	0.8036	0.3264	282128	0.0182	0.0031	5.703e-09	0.3277	271570	0.0181	0.0032	1.365e-08
12	HLX	PR_MULTI	1	221138612	rs6678632	1:221138612:C:T	T	C	0.4367	293051	0.4655	0.0644	4.93e-13	0.4278	271570	0.4477	0.0672	2.615e-11	0.7181	8173	0.1572	0.4704	0.7383	0.4852	12823	0.7733	0.2657	0.003605	0.4368	282128	0.02	0.003	1.152e-11	0.4277	271570	0.0207	0.003	5.346e-12
13	ADCK3	PR_MULTI	1	227173477	rs3768419	1:227173477:C:G	C	G	0.4835	291546	0.4901	0.0639	1.649e-14	0.4946	270065	0.4997	0.0663	4.855e-14	0.295	8173	0.1804	0.4564	0.6926	0.354	12823	0.4305	0.2824	0.1275	0.4889	280623	0.0217	0.0029	1.03e-13	0.4957	270065	0.0221	0.003	8.853e-14
14	SIPA1L2	PR_MULTI	1	232712145	rs1285678	1:232712145:A:G	A	G	0.4721	287628	0.5219	0.066	2.623e-15	0.4771	266147	0.5152	0.069	8.272e-14	0.4147	8173	0.9536	0.4477	0.03317	0.4186	12823	0.5137	0.2672	0.05453	0.4741	276705	0.0238	0.003	3.42e-15	0.4768	266147	0.0236	0.0031	1.664e-14
15	RYR2	PR_MULTI	1	237194922	rs10802580	1:237194922:A:G	G	A	0.7646	286413	0.4541	0.0784	6.949e-09	0.7679	264932	0.4732	0.0818	7.32e-09	0.0474	8173	0.0796	0.9832	0.9354	0.7076	12823	0.3834	0.2904	0.1867	0.77	275490	0.0207	0.0036	1.117e-08	0.7681	264932	0.021	0.0037	9.598e-09
16	SMYD3	PR_MULTI	1	246157144	rs28468565	1:246157144:A:G	A	G	0.6625	287628	0.4934	0.069	8.937e-13	0.6833	266147	0.5375	0.0721	9.083e-14	0.1882	8173	0.2808	0.5498	0.6096	0.5133	12823	0.0239	0.2706	0.9296	0.6695	276705	0.0238	0.0032	7.108e-14	0.6837	266147	0.0247	0.0032	1.918e-14
17	LINC01249	PR_MULTI	2	4824622	rs12616546	2:4824622:A:G	A	G	0.684	293051	0.5252	0.0678	9.166e-15	0.6894	271570	0.5092	0.0711	7.756e-13	0.6213	8173	0.1486	0.4253	0.7268	0.6354	12823	0.9627	0.2704	0.0003702	0.6855	282128	0.0221	0.0031	9.86e-13	0.6893	271570	0.0228	0.0032	8.022e-13
18	STRN	PR_MULTI	2	37102249	rs17496249	2:37102249:A:G	A	G	0.5481	293051	0.6386	0.0638	1.447e-23	0.5424	271570	0.6563	0.0666	6.271e-23	0.6578	8173	0.7181	0.4384	0.1014	0.5985	12823	0.3008	0.2667	0.2594	0.5467	282128	0.0308	0.0029	4.9e-26	0.5431	271570	0.0313	0.003	9.247e-26
19	EML4	PR_MULTI	2	42537995	rs6728830	2:42537995:A:C	C	A	0.9646	291132	1.0168	0.1809	1.909e-08	0.9638	270295	1.0273	0.1842	2.428e-08	0.0147	7529	0.4238	1.8771	0.8214	0.9873	12823	1.2268	1.1544	0.2879	0.9635	280209	0.0468	0.0082	9.803e-09	0.9641	270295	0.0476	0.0083	8.904e-09
20	EPAS1	PR_MULTI	2	46533376	rs11894252	2:46533376:C:T	T	C	0.42	293047	0.4498	0.0641	2.304e-12	0.4149	271566	0.4427	0.067	3.873e-11	0.6313	8173	0.7631	0.4302	0.07608	0.419	12823	0.4457	0.264	0.09142	0.4219	282124	0.0194	0.0029	3.925e-11	0.4139	271566	0.0193	0.003	1.29e-10
21	FBXO11	PR_MULTI	2	48150587	rs7588761	2:48150587:C:T	T	C	0.0682	288153	0.752	0.1288	5.302e-09	0.0667	266672	0.727	0.1351	7.375e-08	0.1197	8173	0.3081	0.6437	0.6322	0.0552	12823	1.6673	0.5853	0.004393	0.0695	276467	0.0302	0.0058	2.445e-07	0.0665	266672	0.0301	0.006	5.962e-07
22	SPTBN1	PR_MULTI	2	54824815	rs4519566	2:54824815:A:G	G	A	0.7854	293051	0.5444	0.0787	4.692e-12	0.7962	271570	0.5532	0.0824	1.949e-11	0.4723	8173	0.9844	0.4227	0.01987	0.8051	12823	0.0901	0.3492	0.7963	0.78	282128	0.0265	0.0036	1.238e-13	0.7966	271570	0.0256	0.0037	3.983e-12
23	LINC01812 - C1D	PR_MULTI	2	68079211	rs7584373	2:68079211:A:G	A	G	0.3494	293051	0.3768	0.0666	1.501e-08	0.3511	271570	0.335	0.0693	1.356e-06	0.4011	8173	0.9865	0.4383	0.02442	0.2981	12823	0.8822	0.2876	0.002156	0.352	282128	0.0161	0.003	1.084e-07	0.35	271570	0.0156	0.0031	5.312e-07
24	FHL2 - LOC285000	PR_MULTI	2	106104856	rs13006682	2:106104856:C:T	C	T	0.3374	293051	0.5102	0.068	6.356e-14	0.3376	271570	0.4749	0.071	2.267e-11	0.2883	8173	1.4101	0.4737	0.002914	0.3554	12823	0.7581	0.278	0.006395	0.335	282128	0.0226	0.0031	3.814e-13	0.337	271570	0.0217	0.0032	8.099e-12
25	NCKAP5	PR_MULTI	2	134326085	rs17816356	2:134326085:A:C	A	C	0.0541	289723	0.9603	0.1562	7.917e-10	0.0552	271570	0.9423	0.1588	2.935e-09	0.9903	4846	0.5145	3.5422	0.8845	0.0205	12822	1.6068	0.9343	0.08547	0.0556	278038	0.0418	0.0071	3.231e-09	0.0558	271570	0.0415	0.0071	4.398e-09
26	TEX41	PR_MULTI	2	145453968	rs76909456	2:145453968:A:G	G	A	0.2367	293051	0.4832	0.0758	1.806e-10	0.2417	271570	0.4687	0.0777	1.58e-09	0.0554	8173	1.6492	0.9346	0.07763	0.149	12823	0.6835	0.3811	0.07287	0.2396	282128	0.0209	0.0035	1.387e-09	0.2418	271570	0.0205	0.0035	3.555e-09
27	LINC01473 - ZC3H15	PR_MULTI	2	187033804	rs138711926	2:187033804:A:G	G	A	0.0413	280792	0.9834	0.1801	4.739e-08	0.042	267484	0.9692	0.1822	1.039e-07	NA	NA	NA	NA	NA	0.0122	12823	1.6039	1.2354	0.1942	0.042	269106	0.0435	0.0081	8.469e-08	0.0421	267484	0.0431	0.0081	1.199e-07
28	SDPR	PR_MULTI	2	192723128	rs58577564	2:192723128:A:T	A	T	0.1014	291546	0.7793	0.1087	7.501e-13	0.0953	270065	0.7321	0.1159	2.712e-10	0.168	8173	1.4299	0.5751	0.0129	0.1378	12823	1.0812	0.3769	0.00412	0.1	280623	0.0351	0.005	2.461e-12	0.0952	270065	0.034	0.0052	5.374e-11
29	BMPR2	PR_EUR	2	203373030	rs2103208	2:203373030:A:G	G	A	0.4958	293051	0.3415	0.0636	7.97e-08	0.4938	271570	0.3628	0.0664	4.756e-08	0.597	8173	0.4198	0.4379	0.3378	0.509	12823	0.0224	0.2606	0.9316	0.4967	282128	0.0179	0.0029	7.758e-10	0.494	271570	0.0175	0.003	3.817e-09
30	AC007563.5	PR_EUR	2	217628087	rs6435953	2:217628087:C:T	C	T	0.1677	293051	0.4559	0.0858	1.061e-07	0.1621	271570	0.5067	0.0904	2.083e-08	0.2779	8173	0.3997	0.4716	0.3967	0.8101	12823	0.1291	0.3356	0.7006	0.1671	282128	0.0221	0.0039	2.014e-08	0.1609	271570	0.023	0.0041	1.435e-08
31	TMEM198	PR_MULTI	2	220414019	rs13023533	2:220414019:C:T	T	C	0.5464	293051	0.4143	0.0642	1.059e-10	0.5482	271570	0.405	0.067	1.498e-09	0.5596	8173	0.9751	0.4275	0.02257	0.5134	12823	0.3468	0.2648	0.1903	0.5484	282128	0.0201	0.0029	7.745e-12	0.5478	271570	0.0193	0.003	1.319e-10
32	LSM3	PR_MULTI	3	14275759	rs6442433	3:14275759:C:G	C	G	0.7885	291836	0.7058	0.0783	1.932e-19	0.7847	270355	0.6865	0.0811	2.451e-17	0.8306	8173	1.292	0.5499	0.0188	0.8465	12823	0.8544	0.3697	0.02082	0.7866	280913	0.0324	0.0036	8.879e-20	0.7849	270355	0.0318	0.0036	1.654e-18
33	THRB	PR_MULTI	3	24465080	rs60325252	3:24465080:C:T	C	T	0.7071	293051	0.7483	0.0699	9.094e-27	0.7031	271570	0.78	0.0725	5.17e-27	0.8572	8173	1.237	0.6049	0.04086	0.7389	12823	0.1348	0.298	0.6512	0.7058	282128	0.036	0.0032	1.864e-29	0.7031	271570	0.0351	0.0032	2.949e-27
34	TRAK1	PR_MULTI	3	42103045	rs11921457	3:42103045:G:T	T	G	0.8111	292301	0.6935	0.0861	7.954e-16	0.8079	270820	0.7337	0.0889	1.497e-16	0.0409	8173	0.3961	1.1369	0.7275	0.8526	12823	0.1742	0.3741	0.6414	0.808	281378	0.0326	0.0039	8.051e-17	0.8066	270820	0.0335	0.004	2.622e-17
35	LAMB2	PR_MULTI	3	49166069	rs9865051	3:49166069:C:T	T	C	0.7788	293051	0.4856	0.0775	3.71e-10	0.7739	271570	0.4716	0.0799	3.527e-09	0.8768	8173	0.4833	0.6371	0.4481	0.8538	12823	0.7842	0.3803	0.03922	0.7764	281365	0.0219	0.0035	5.442e-10	0.774	271570	0.0221	0.0036	6.695e-10
36	ADCY5	PR_MULTI	3	123117165	rs1000368	3:123117165:C:T	T	C	0.2592	293051	0.4341	0.0728	2.471e-09	0.2624	271570	0.3944	0.0756	1.8e-07	0.148	8173	1.678	0.5994	0.005117	0.2367	12823	0.7538	0.3092	0.01478	0.2604	282128	0.018	0.0033	6.834e-08	0.2631	271570	0.0171	0.0034	4.026e-07
37	TSC22D2	PR_MULTI	3	150176904	rs201481721	3:150176904:D:I	D	I	0.0328	223845	1.3235	0.2202	1.843e-09	0.0334	204626	1.3068	0.229	1.152e-08	0.993	5911	5.1916	3.1672	0.1012	0.0261	12823	1.8737	0.8473	0.02702	0.0333	212159	0.0604	0.0103	4.44e-09	0.0335	204626	0.06	0.0104	7.403e-09
38	RAP2B	PR_MULTI	3	153000092	rs4680046	3:153000092:C:T	T	C	0.4908	293051	0.4714	0.0635	1.195e-13	0.4853	271570	0.4833	0.0662	2.817e-13	0.7288	8173	0.6664	0.4733	0.1591	0.5009	12823	0.2357	0.2648	0.3734	0.4925	282128	0.0221	0.0029	3.292e-14	0.4854	271570	0.0222	0.003	6.456e-14
39	MLF1	PR_EUR	3	158333891	rs6799180	3:158333891:A:G	A	G	0.4662	293051	0.3396	0.0635	8.883e-08	0.4714	271570	0.3705	0.0662	2.17e-08	0.693	8173	0.4008	0.4499	0.373	0.4369	12823	0.0576	0.2651	0.828	0.4674	282128	0.0148	0.0029	3.362e-07	0.4718	271570	0.0159	0.003	7.879e-08
40	FNDC3B	PR_MULTI	3	171800256	rs4894803	3:171800256:A:G	G	A	0.3885	293046	0.4858	0.066	1.837e-13	0.3931	271565	0.4937	0.0686	6.209e-13	0.1577	8173	0.7393	0.5993	0.2173	0.3667	12823	0.3694	0.2698	0.1709	0.3889	282123	0.0219	0.003	5.265e-13	0.3939	271565	0.0218	0.0031	1.147e-12
41	FGF12	PR_MULTI	3	192373761	rs4687352	3:192373761:A:C	A	C	0.4097	293051	0.5333	0.0645	1.333e-16	0.4012	271570	0.5269	0.0673	4.896e-15	0.458	8173	0.7488	0.4159	0.07179	0.5315	12823	0.5797	0.2737	0.03417	0.4028	282128	0.0246	0.0029	5.802e-17	0.4008	271570	0.0242	0.003	1.082e-15
42	DLG1	PR_MULTI	3	196799232	rs143879787	3:196799232:D:I	I	D	0.7339	226107	0.5135	0.0849	1.434e-09	0.7258	204626	0.5103	0.088	6.661e-09	0.947	8173	0.5283	0.9615	0.5827	0.8277	12823	0.4896	0.3463	0.1573	0.7277	215184	0.0223	0.004	1.679e-08	0.726	204626	0.0225	0.004	1.754e-08
43	SRD5A3	PR_MULTI	4	56123105	rs77422711	4:56123105:A:G	A	G	0.0167	273824	1.8478	0.299	6.42e-10	0.0169	262138	1.7959	0.302	2.748e-09	NA	NA	NA	NA	NA	0.0043	11686	4.384	2.1128	0.03798	0.0173	262138	0.0743	0.0134	2.693e-08	0.0173	262138	0.0743	0.0134	2.693e-08
44	LPHN3	PR_MULTI	4	62409801	rs28540500	4:62409801:C:G	C	G	0.3773	293051	0.4169	0.0658	2.443e-10	0.3797	271570	0.4081	0.0685	2.513e-09	0.1964	8173	0.0335	0.5335	0.9499	0.3875	12823	0.58	0.2742	0.03443	0.3747	282128	0.0176	0.003	4.96e-09	0.3794	271570	0.0177	0.0031	7.947e-09
45	FGF5	PR_MULTI	4	81202048	rs36034102	4:81202048:G:T	T	G	0.266	292217	0.43	0.0728	3.476e-09	0.2688	270736	0.4428	0.0756	4.671e-09	0.1101	8173	0.5665	0.6919	0.413	0.2522	12823	0.0944	0.2985	0.7518	0.2657	281294	0.0195	0.0033	5.81e-09	0.2686	270736	0.0186	0.0034	3.655e-08
46	PDLIM5	PR_MULTI	4	95506214	rs2172448	4:95506214:A:G	A	G	0.5467	288153	0.3695	0.0644	9.408e-09	0.5494	266672	0.3913	0.0673	6.231e-09	0.3862	8173	0.1963	0.4236	0.6431	0.4814	12823	0.2474	0.261	0.3432	0.5498	277230	0.0163	0.0029	3.192e-08	0.5481	266672	0.0169	0.003	1.759e-08
47	MYOZ2	PR_EUR	4	120070079	rs78277783	4:120070079:A:T	A	T	0.2701	288153	0.3573	0.0726	8.647e-07	0.2705	266672	0.4232	0.0755	2.056e-08	0.9092	8173	1.3838	0.7382	0.06086	0.7078	12823	0.3897	0.2906	0.1799	0.2681	277230	0.0179	0.0033	8.29E-08*	0.271	266672	0.0188	0.0034	2.43e-08
48	SLC12A7	PR_MULTI	5	1054197	rs4975572	5:1054197:C:T	T	C	0.4648	293051	0.6182	0.0658	5.484e-21	0.4739	271570	0.6039	0.0683	9.728e-19	0.1671	8173	0.6773	0.6004	0.2593	0.3852	12823	0.7764	0.2701	0.004049	0.4673	282128	0.0268	0.003	4.959e-19	0.4738	271570	0.0267	0.0031	2.123e-18
49	SUB1	PR_MULTI	5	32629419	rs17441816	5:32629419:A:G	G	A	0.2922	293051	0.5078	0.0702	4.703e-13	0.2987	271570	0.4815	0.0723	2.728e-11	0.1154	8173	0.2402	0.6565	0.7145	0.1977	12823	1.0326	0.3374	0.002207	0.2946	282128	0.0217	0.0032	1.142e-11	0.2982	271570	0.0215	0.0032	3.388e-11
50	HCN1	PR_MULTI	5	45864843	rs10039283	5:45864843:A:G	A	G	0.4085	293051	0.6445	0.0649	3.206e-23	0.4001	271570	0.6318	0.0677	1.045e-20	0.7153	8173	0.7852	0.4716	0.0959	0.4365	12823	0.6781	0.2683	0.01148	0.4109	282128	0.0269	0.003	1.4e-19	0.4011	271570	0.0268	0.003	9.387e-19
51	NR2F1	PR_MULTI	5	92455655	rs4869412	5:92455655:A:G	G	A	0.4863	293051	0.4034	0.0637	2.33e-10	0.4743	271570	0.4294	0.0661	8.059e-11	0.3082	8173	0.08	0.4501	0.8589	0.6287	12823	0.2765	0.2866	0.3346	0.4804	282128	0.0193	0.0029	2.603e-11	0.473	271570	0.0202	0.003	8.275e-12
52	FER	PR_EUR	5	108210304	rs6889995	5:108210304:A:G	G	A	0.2213	288153	0.4045	0.0776	1.868e-07	0.2205	266672	0.4443	0.0811	4.304e-08	0.7093	8173	0.354	0.4614	0.4429	0.1976	12823	0.146	0.3356	0.6634	0.2238	277230	0.0188	0.0035	9.21E-08*	0.2211	266672	0.0201	0.0036	2.855e-08
53	STARD4	PR_MULTI	5	111046342	rs67968533	5:111046342:C:T	C	T	0.0884	293051	0.6598	0.1127	4.763e-09	0.0882	271570	0.7005	0.1178	2.727e-09	0.1155	8173	0.2733	0.6534	0.6758	0.0766	12823	0.1996	0.4895	0.6834	0.0903	282128	0.0308	0.0051	1.77e-09	0.0882	271570	0.0313	0.0053	2.954e-09
54	LOC101927421 - ZNF608	PR_MULTI	5	124343851	rs12654442	5:124343851:C:T	T	C	0.2672	293051	0.4594	0.0728	2.836e-10	0.2475	271570	0.4654	0.0767	1.303e-09	0.4259	8173	0.4114	0.4198	0.3272	0.4622	12823	0.3234	0.2842	0.2551	0.2586	282128	0.0204	0.0033	9.472e-10	0.2484	271570	0.0208	0.0034	1.349e-09
55	SLC27A6	PR_MULTI	5	128299279	rs2577531	5:128299279:C:T	C	T	0.5923	293051	0.3815	0.0647	3.795e-09	0.5871	271570	0.3559	0.0674	1.273e-07	0.632	8173	0.5368	0.4292	0.2111	0.6664	12823	0.7176	0.2839	0.01147	0.5898	282128	0.0154	0.003	1.835e-07	0.5878	271570	0.0155	0.003	2.984e-07
56	FGF18	PR_MULTI	5	170868622	rs78810186	5:170868622:C:T	T	C	0.1112	290821	0.7415	0.1046	1.362e-12	0.1116	271250	0.7862	0.1088	4.967e-13	0.0622	7400	0.2092	0.9487	0.8255	0.1142	11686	0.2507	0.4256	0.5558	0.1122	279898	0.0345	0.0048	5.51e-13	0.1128	271250	0.0353	0.0048	3.336e-13
57	LINC01411	PR_MULTI	5	173779209	rs4868384	5:173779209:A:T	T	A	0.4663	290336	0.4707	0.0643	2.548e-13	0.4635	271250	0.4594	0.0666	5.19e-12	0.3243	7400	0.966	0.475	0.04199	0.5759	11686	0.5001	0.2934	0.08829	0.4601	279413	0.0217	0.0029	1.393e-13	0.4634	271250	0.0215	0.003	5.32e-13
58	DSP	PR_MULTI	6	7527269	rs72825038	6:7527269:A:G	A	G	0.0893	293051	0.9361	0.1144	2.7e-16	0.0907	271570	0.9373	0.1182	2.161e-15	0.043	8173	0.8737	1.1048	0.429	0.0731	12823	1.0004	0.5085	0.04917	0.091	281365	0.0443	0.0052	1.861e-17	0.0918	271570	0.0445	0.0053	2.713e-17
59	DEK	PR_MULTI	6	18227546	rs214502	6:18227546:A:C	A	C	0.5785	291546	0.4217	0.0652	9.906e-11	0.592	270065	0.4234	0.0681	5.187e-10	0.6104	8173	0.3328	0.4371	0.4465	0.4466	12823	0.6032	0.266	0.02334	0.5845	280623	0.0188	0.003	3.064e-10	0.5916	270065	0.0197	0.003	1.1e-10
60	HDGFL1	PR_MULTI	6	22570189	rs6922960	6:22570189:C:T	C	T	0.2762	291546	0.6138	0.071	5.581e-18	0.2769	270065	0.5813	0.0742	4.598e-15	0.2544	8173	0.8242	0.4783	0.08487	0.2732	12823	1.0503	0.2937	0.0003485	0.2773	280623	0.0246	0.0032	3.412e-14	0.2783	270065	0.0245	0.0033	1.517e-13
61	LRRC16A	PR_MULTI	6	25351477	rs139915396	6:25351477:D:I	I	D	0.0964	226107	0.688	0.1255	4.236e-08	0.0926	204626	0.7071	0.1339	1.301e-07	0.1799	8173	0.8099	0.5421	0.1352	0.0792	12823	0.216	0.4887	0.6585	0.1005	215184	0.0286	0.0058	7.266e-07	0.0934	204626	0.0297	0.0061	9.156e-07
62	CDKN1A	PR_MULTI	6	36645968	rs730506	6:36645968:C:G	C	G	0.201	293051	0.6233	0.08	6.5e-15	0.1998	271570	0.5857	0.0838	2.756e-12	0.2472	8173	0.8629	0.4868	0.07631	0.1969	12823	1.0615	0.3283	0.001224	0.202	282128	0.0268	0.0037	2.111e-13	0.2	271570	0.0267	0.0037	1.035e-12
63	TFEB	PR_MULTI	6	41658889	rs1015149	6:41658889:C:T	T	C	0.4713	293051	0.4513	0.0639	1.599e-12	0.4688	271570	0.4463	0.0668	2.325e-11	0.5516	8173	0.0149	0.4186	0.9716	0.4763	12823	0.5122	0.2622	0.05075	0.4719	282128	0.0203	0.0029	3.681e-12	0.469	271570	0.0199	0.003	2.464e-11
64	RCAN2	PR_MULTI	6	46452619	rs871728	6:46452619:C:T	C	T	0.4203	293051	0.5194	0.065	1.327e-15	0.4038	271570	0.5133	0.0675	2.957e-14	0.8232	8173	0.3844	0.5631	0.4948	0.5849	12823	0.6725	0.2687	0.0123	0.414	282128	0.0232	0.003	7.33e-15	0.4043	271570	0.0231	0.003	2.274e-14
65	LOC101927686	PR_MULTI	6	113978255	rs111739590	6:113978255:C:T	C	T	0.8136	293051	0.4964	0.0822	1.523e-09	0.8123	271570	0.4975	0.0855	5.912e-09	0.8149	8173	0.3388	0.5449	0.5341	0.8379	12823	0.5407	0.3636	0.137	0.8112	281365	0.0218	0.0037	5.48e-09	0.8112	271570	0.0223	0.0038	5.463e-09
66	TCF21	PR_MULTI	6	134214525	rs12190287	6:134214525:C:G	G	C	0.373	290979	0.4258	0.0675	2.857e-10	0.3742	270142	0.3925	0.07	2.072e-08	0.0936	7529	1.6831	0.7505	0.02492	0.3944	12823	0.7802	0.2762	0.004732	0.371	280056	0.0178	0.0031	9.131e-09	0.3745	270142	0.0174	0.0031	2.76e-08
67	RP1-155D22.1	PR_MULTI	6	164532059	rs206708	6:164532059:A:T	A	T	0.6984	293051	0.4714	0.0702	1.94e-11	0.6982	271570	0.4824	0.0729	3.568e-11	0.9072	8173	0.6284	0.7232	0.3849	0.6678	12823	0.2511	0.2897	0.3861	0.7019	282128	0.0226	0.0032	2.48e-12	0.699	271570	0.0222	0.0033	9.628e-12
68	GET4	PR_MULTI	7	925949	rs10226357	7:925949:A:G	G	A	0.5899	293050	0.3865	0.0652	3.096e-09	0.5908	271569	0.4107	0.0682	1.689e-09	0.512	8173	0.2518	0.4263	0.5547	0.6065	12823	0.1326	0.2694	0.6225	0.5888	282127	0.0189	0.003	2.521e-10	0.5913	271569	0.0195	0.003	1.471e-10
69	DGKB	PR_MULTI	7	14453835	rs56352403	7:14453835:A:G	G	A	0.642	291623	0.5558	0.0673	1.417e-16	0.6409	270142	0.5747	0.0701	2.452e-16	0.8078	8173	0.1524	0.5354	0.7759	0.6166	12823	0.386	0.2713	0.1548	0.6442	280700	0.0251	0.0031	4.486e-16	0.6405	270142	0.0258	0.0031	1.721e-16
70	PRPS1L1	PR_MULTI	7	18040476	rs6961768	7:18040476:A:C	A	C	0.4335	293051	0.3835	0.0646	2.977e-09	0.4249	271570	0.4082	0.0675	1.492e-09	0.6629	8173	0.2733	0.4436	0.5379	0.4823	12823	0.0389	0.263	0.8825	0.4341	282128	0.0168	0.003	1.299e-08	0.4255	271570	0.0172	0.003	1.415e-08
71	DNAH11	PR_MULTI	7	21622494	rs62441680	7:21622494:C:T	C	T	0.1708	293051	0.6214	0.0847	2.252e-13	0.1731	271570	0.5936	0.0879	1.43e-11	0.1508	8173	1.1076	0.5884	0.05979	0.1326	12823	1.0229	0.3911	0.008909	0.1727	282128	0.0266	0.0039	4.93e-12	0.1732	271570	0.0261	0.0039	3.189e-11
72	ELMO1	PR_MULTI	7	37398113	rs4720244	7:37398113:C:G	C	G	0.6413	293051	0.4168	0.0665	3.597e-10	0.645	271570	0.3728	0.0694	7.929e-08	0.7257	8173	1.8094	0.4672	0.0001077	0.5597	12823	0.6313	0.2681	0.01854	0.6463	282128	0.0182	0.003	2.393e-09	0.6451	271570	0.0163	0.0031	1.641e-07
73	SEMA3A	PR_MULTI	7	83998676	rs62472627	7:83998676:C:T	C	T	0.1418	293051	0.6065	0.0929	6.676e-11	0.1448	271570	0.5902	0.095	5.226e-10	0.0312	8173	4.7518	1.3073	0.0002782	0.0814	12823	0.607	0.4837	0.2095	0.1442	281365	0.0276	0.0042	6.501e-11	0.1453	271570	0.027	0.0042	1.875e-10
74	CHRM2	PR_MULTI	7	136569416	rs1424569	7:136569416:C:T	C	T	0.5254	293051	0.3559	0.0651	4.562e-08	0.5311	271570	0.3591	0.0681	1.371e-07	0.5564	8173	0.4645	0.4187	0.2673	0.4291	12823	0.2313	0.2632	0.3795	0.5322	282128	0.0153	0.003	2.557e-07	0.5322	271570	0.0151	0.003	6.791e-07
75	DLC1	PR_MULTI	8	13130478	rs1188285	8:13130478:C:T	C	T	0.5587	293050	0.447	0.0637	2.353e-12	0.5583	271570	0.4593	0.0667	5.615e-12	0.622	8173	0.4258	0.4314	0.3237	0.5422	12822	0.2574	0.2567	0.3159	0.5596	282128	0.0203	0.0029	4.111e-12	0.5584	271570	0.0201	0.003	1.574e-11
76	MTUS1	PR_MULTI	8	17550623	rs4921804	8:17550623:A:G	G	A	0.6288	289672	0.3926	0.0669	4.392e-09	0.6226	268192	0.4138	0.0693	2.374e-09	0.1396	8173	0.4929	0.5974	0.4094	0.6842	12822	0.1377	0.2881	0.6327	0.6261	278750	0.0179	0.0031	4.219e-09	0.6212	268192	0.0183	0.0031	3.037e-09
77	XPO7	PR_MULTI	8	21775838	rs56317071	8:21775838:C:G	C	G	0.1169	293050	0.5737	0.1007	1.228e-08	0.1129	271570	0.5307	0.1064	6.134e-07	0.1843	8173	1.6276	0.5531	0.003256	0.1339	12822	0.7265	0.3854	0.05942	0.1172	282128	0.0271	0.0046	3.893e-09	0.1136	271570	0.0259	0.0047	5.035e-08
78	RBPMS	PR_MULTI	8	30302465	rs4545054	8:30302465:C:T	C	T	0.4924	293050	0.3568	0.0636	2.01e-08	0.4981	271570	0.355	0.0663	8.448e-08	0.4441	8173	0.5328	0.4222	0.207	0.4134	12822	0.3772	0.2723	0.1659	0.4965	282128	0.0152	0.0029	1.652e-07	0.4988	271570	0.0154	0.003	2.159e-07
79	AZIN1	PR_EUR	8	103914366	rs565720	8:103914366:A:C	A	C	0.7654	293050	0.401	0.075	8.821e-08	0.7709	271570	0.4359	0.0787	3.113e-08	0.3857	8173	0.0124	0.423	0.9766	0.7619	12822	0.0926	0.3058	0.7619	0.7638	282128	0.0183	0.0034	9.307e-08	0.7711	271570	0.0193	0.0035	4.424e-08
80	RP11-1082L8.3	PR_MULTI	8	125859817	rs35006907	8:125859817:A:C	A	C	0.3146	293050	0.4845	0.0685	1.559e-12	0.3184	271570	0.505	0.0712	1.288e-12	0.1462	8173	0.2224	0.5989	0.7103	0.2928	12822	0.2329	0.2855	0.4147	0.3154	282128	0.0216	0.0031	5.844e-12	0.3186	271570	0.0228	0.0032	9.081e-13
81	PTK2	PR_MULTI	8	142006198	rs10106406	8:142006198:C:G	C	G	0.4481	282729	0.402	0.0664	1.413e-09	0.4325	261249	0.4086	0.069	3.234e-09	0.7239	8173	0.4562	0.4751	0.3369	0.6194	12822	0.2935	0.2897	0.311	0.441	271807	0.018	0.003	2.647e-09	0.4313	261249	0.0181	0.0031	4.002e-09
82	TRPM3	PR_MULTI	9	73482647	rs6560168	9:73482647:A:T	T	A	0.4505	292407	0.4488	0.0639	2.208e-12	0.4501	271570	0.4346	0.0667	7.433e-11	0.4595	7529	0.5349	0.4422	0.2264	0.453	12823	0.6334	0.2623	0.01575	0.4507	281484	0.019	0.0029	8.652e-11	0.4498	271570	0.0187	0.003	3.682e-10
83	SPATA31D5P - RASEF	PR_MULTI	9	85135915	rs7043482	9:85135915:A:C	A	C	0.6529	293050	0.4216	0.0687	8.266e-10	0.672	271569	0.4364	0.0718	1.214e-09	0.7975	8173	0.3158	0.5259	0.5482	0.5084	12823	0.4296	0.2685	0.1096	0.6576	282127	0.02	0.0031	2.16e-10	0.6717	271569	0.021	0.0032	5.709e-11
84	ASTN2	PR_MULTI	9	119314851	rs1407243	9:119314851:C:T	C	T	0.6009	293051	0.3718	0.0647	9.113e-09	0.5985	271570	0.3364	0.0675	6.313e-07	0.5885	8173	1.2128	0.42	0.003879	0.6462	12823	0.6469	0.2743	0.01836	0.5973	282128	0.016	0.003	6.192e-08	0.598	271570	0.0154	0.003	3.656e-07
85	PLPP7	PR_MULTI	9	134203545	rs4584185	9:134203545:C:T	C	T	0.4506	278484	0.4845	0.0673	6.083e-13	0.44	257003	0.4851	0.0703	5.327e-12	0.6871	8173	0.4364	0.5012	0.3838	0.5356	12823	0.3782	0.267	0.1567	0.4473	267561	0.0216	0.0031	2.106e-12	0.44	257003	0.0216	0.0031	5.801e-12
86	BEND7	PR_MULTI	10	13534234	rs7916672	10:13534234:C:T	T	C	0.5781	293051	0.353	0.0642	3.847e-08	0.5799	271570	0.349	0.0671	1.95e-07	0.6106	8173	0.5336	0.4317	0.2165	0.5376	12823	0.2788	0.264	0.2909	0.5818	282128	0.0163	0.0029	2.898e-08	0.5815	271570	0.0158	0.003	1.443e-07
87	CCDC7	PR_MULTI	10	32847962	rs2947080	10:32847962:C:G	G	C	0.636	293051	0.4108	0.0659	4.579e-10	0.6433	271570	0.389	0.0689	1.679e-08	0.6423	8173	0.9359	0.4375	0.03242	0.5243	12823	0.6401	0.2665	0.01632	0.642	282128	0.0172	0.003	1.118e-08	0.6432	271570	0.0172	0.0031	2.326e-08
88	CEFIP	PR_MULTI	10	50510406	rs10776558	10:50510406:C:T	C	T	0.5342	293050	0.4236	0.0636	2.784e-11	0.5262	271570	0.4062	0.0663	8.874e-10	0.6968	8173	0.3247	0.4549	0.4754	0.6067	12822	0.7062	0.2675	0.008295	0.5303	282128	0.0183	0.0029	3.21e-10	0.5244	271570	0.0185	0.003	4.144e-10
89	TMEM26	PR_MULTI	10	63194576	rs74813029	10:63194576:A:G	A	G	0.1677	293051	0.5352	0.0852	3.296e-10	0.1694	271570	0.5551	0.0885	3.59e-10	0.1503	8173	0.8953	0.583	0.1246	0.8576	12823	0.0041	0.3792	0.9914	0.1687	282128	0.0257	0.0039	3.377e-11	0.1694	271570	0.0255	0.004	1.202e-10
90	COL13A1	PR_MULTI	10	71559723	rs2642608	10:71559723:C:T	T	C	0.2705	293051	0.4223	0.0717	3.795e-09	0.2769	271570	0.4485	0.0738	1.21e-09	0.8408	8173	0.8335	0.5732	0.1459	0.1621	12823	0.2411	0.3631	0.5067	0.2741	282128	0.0188	0.0033	7.297e-09	0.2772	271570	0.02	0.0033	1.363e-09
91	ZMIZ1	PR_MULTI	10	80898969	rs1769758	10:80898969:G:T	T	G	0.4972	267464	0.5012	0.0736	9.972e-12	0.4967	245983	0.5088	0.0769	3.764e-11	0.7958	8173	0.1617	0.6034	0.7888	0.57	12823	0.5308	0.2857	0.06317	0.4902	256541	0.022	0.0034	7.365e-11	0.4964	245983	0.0229	0.0034	2.611e-11
92	U3	PR_MULTI	10	88509088	rs117443987	10:88509088:A:T	T	A	0.9168	288153	0.9976	0.1193	6.126e-17	0.9148	266672	0.9744	0.122	1.372e-15	0.9709	8173	2.7374	1.2607	0.0299	0.9574	12823	1.1665	0.6559	0.07532	0.9158	277230	0.0422	0.0054	5.42e-15	0.9149	266672	0.0416	0.0054	2.054e-14
93	ADRB1	PR_MULTI	10	115782061	rs67234920	10:115782061:A:G	G	A	0.893	293051	0.6696	0.1056	2.255e-10	0.9032	271570	0.6188	0.1126	3.84e-08	0.7323	8173	0.9374	0.466	0.04429	0.8828	12823	1.0382	0.4103	0.01141	0.8902	282128	0.028	0.0048	5.872e-09	0.9034	271570	0.028	0.005	2.75e-08
94	FGFR2	PR_MULTI	10	123348662	rs2912774	10:123348662:G:T	T	G	0.4188	288153	0.4837	0.0653	1.283e-13	0.4139	266672	0.4963	0.0684	4.063e-13	0.4343	8173	0.0931	0.4185	0.824	0.4317	12823	0.5259	0.2621	0.04482	0.42	277230	0.0211	0.003	1.568e-12	0.4144	266672	0.0219	0.0031	8.501e-13
95	MPPED2	PR_MULTI	11	30432176	rs553951	11:30432176:C:T	C	T	0.7252	293051	0.3936	0.0716	3.827e-08	0.7344	271570	0.4102	0.0753	5.062e-08	0.5513	8173	0.4609	0.4232	0.2761	0.6745	12823	0.165	0.2811	0.5573	0.7246	273041	0.0182	0.0033	4.72e-08	0.7343	262483	0.0188	0.0034	4.096e-08
96	WT1	PR_MULTI	11	32372772	rs11031737	11:32372772:A:G	G	A	0.5203	293051	0.3482	0.0637	4.512e-08	0.5227	271570	0.331	0.0665	6.336e-07	0.4453	8173	0.6227	0.4281	0.1457	0.5119	12823	0.4582	0.2637	0.08223	0.5197	273041	0.0157	0.003	1.229e-07	0.5231	262483	0.0152	0.003	5.063e-07
97	PCNXL3	PR_MULTI	11	65391317	rs12801636	11:65391317:A:G	A	G	0.2419	293051	0.4111	0.0749	4.095e-08	0.2306	271570	0.4035	0.079	3.224e-07	0.2612	8173	1.3948	0.4729	0.003186	0.3755	12823	0.1319	0.2789	0.6363	0.2331	282128	0.0191	0.0034	3.151e-08	0.2305	271570	0.0176	0.0035	5.854e-07
98	CRYAB	PR_MULTI	11	111776066	rs12808601	11:111776066:A:G	G	A	0.7004	293050	0.5088	0.0698	3.111e-13	0.7074	271570	0.4794	0.0734	6.553e-11	0.5915	8173	0.808	0.4272	0.05859	0.6511	12822	0.7678	0.2706	0.004552	0.7012	282128	0.0239	0.0032	8.709e-14	0.706	271570	0.0225	0.0033	6.858e-12
99	USP28	PR_MULTI	11	113666335	rs144789148	11:113666335:A:G	G	A	0.0468	290495	0.9611	0.1656	6.422e-09	0.0476	271277	1.0094	0.1683	1.985e-09	0.9936	5911	1.6636	3.4357	0.6282	0.9782	12822	0.5658	0.9787	0.5632	0.0471	278810	0.0461	0.0075	8.605e-10	0.0474	271277	0.0463	0.0075	8.26e-10
100	PDE3A	PR_MULTI	12	20544361	rs10770646	12:20544361:C:T	T	C	0.7928	288153	0.5328	0.0815	6.383e-11	0.8117	266672	0.563	0.0869	9.458e-11	0.6045	8173	0.5415	0.4349	0.2131	0.6734	12823	0.2279	0.283	0.4206	0.7996	277230	0.025	0.0038	2.718e-11	0.812	266672	0.0261	0.0039	1.939e-11
101	SSPN	PR_MULTI	12	26306484	rs78518764	12:26306484:C:T	T	C	0.8567	293051	0.606	0.0954	2.107e-10	0.8537	271570	0.5921	0.0976	1.299e-09	0.9742	8173	0.5089	1.394	0.715	0.9157	12823	0.8693	0.4916	0.07702	0.8545	272278	0.0265	0.0044	2.033e-09	0.8535	262483	0.0261	0.0044	4.188e-09
102	ARID2	PR_MULTI	12	46209520	rs76611452	12:46209520:C:T	T	C	0.0404	286416	1.1895	0.1858	1.527e-10	0.0413	267970	1.1431	0.1894	1.581e-09	0.0065	5138	0.1029	3.5587	0.9769	0.0163	12823	2.4685	1.0416	0.01779	0.0413	274730	0.0529	0.0084	3.004e-10	0.0415	267970	0.0525	0.0084	4.763e-10
103	SRGAP1	PR_MULTI	12	64283014	rs17099893	12:64283014:A:G	A	G	0.056	291836	0.9504	0.1396	9.89e-12	0.0561	270355	0.9523	0.1461	7.084e-11	0.0579	8173	2.9203	0.8884	0.001012	0.0539	12823	0.3262	0.5683	0.566	0.0566	271826	0.0419	0.0065	1.181e-10	0.056	261268	0.0391	0.0067	4.618e-09
104	MIR6074	PR_MULTI	12	66394664	rs4026608	12:66394664:C:T	T	C	0.6167	293051	0.3822	0.0658	6.482e-09	0.6212	271570	0.3894	0.0689	1.566e-08	0.6743	8173	1.0364	0.4439	0.01956	0.4712	12823	0.0278	0.2657	0.9167	0.6222	273041	0.0167	0.0031	5.85E-08*	0.6214	262483	0.0161	0.0031	3.118e-07
105	SLC6A15	PR_MULTI	12	84806298	rs10862858	12:84806298:A:G	A	G	0.433	293051	0.4568	0.0642	1.112e-12	0.437	271570	0.4757	0.067	1.252e-12	0.3901	8173	0.1439	0.4292	0.7374	0.3881	12823	0.2761	0.2678	0.3025	0.4335	282128	0.0208	0.0029	1.521e-12	0.4344	271570	0.0212	0.003	1.45e-12
106	HCFC2	PR_MULTI	12	104503806	rs2629745	12:104503806:A:G	A	G	0.8792	293051	0.6946	0.0984	1.684e-12	0.8774	271570	0.6788	0.1017	2.519e-11	0.954	8173	0.5648	0.9995	0.572	0.8963	12823	0.9431	0.4267	0.0271	0.877	282128	0.0295	0.0045	6.233e-11	0.8781	271570	0.03	0.0046	5.042e-11
107	RIC8B	PR_MULTI	12	107166122	rs3759310	12:107166122:C:G	G	C	0.357	293051	0.558	0.0664	4.505e-17	0.3502	271570	0.5556	0.0695	1.351e-15	0.5277	8173	0.6849	0.4172	0.1007	0.3876	12823	0.5811	0.272	0.03268	0.3577	282128	0.0261	0.003	7.69e-18	0.3508	271570	0.0259	0.0031	8.238e-17
108	UBE3B	PR_MULTI	12	109976893	rs2004359	12:109976893:G:T	G	T	0.4682	291836	0.4195	0.0638	4.981e-11	0.4722	270355	0.415	0.0665	4.387e-10	0.29	8173	0.3813	0.4678	0.415	0.4633	12823	0.5152	0.2658	0.05262	0.4669	280913	0.0191	0.0029	7.196e-11	0.4717	270355	0.0191	0.003	1.599e-10
109	TESC	PR_MULTI	12	117491824	rs7972416	12:117491824:A:G	A	G	0.6555	293051	0.4516	0.0672	1.779e-11	0.6594	271570	0.4255	0.0699	1.138e-09	0.3943	8173	0.9803	0.4437	0.02713	0.7034	12823	0.6949	0.2973	0.01943	0.6502	282128	0.0191	0.0031	4.9e-10	0.6592	271570	0.0185	0.0031	3.232e-09
110	FREM2	PR_MULTI	13	39261151	rs9634754	13:39261151:G:T	G	T	0.6902	293051	0.41	0.0698	4.351e-09	0.7068	271570	0.429	0.073	4.225e-09	0.7616	8173	0.2385	0.5225	0.6481	0.5839	12823	0.3542	0.2746	0.1971	0.6931	282128	0.0184	0.0032	9.068e-09	0.707	271570	0.0191	0.0033	4.599e-09
111	FGF14	PR_MULTI	13	102878269	rs9513995	13:102878269:C:T	T	C	0.7442	287628	0.4982	0.0744	2.1e-11	0.7386	266147	0.4686	0.0766	9.681e-10	0.9195	8173	2.0771	0.7824	0.007936	0.8197	12823	0.7793	0.3421	0.02272	0.7414	276705	0.0232	0.0034	8.015e-12	0.7383	266147	0.022	0.0034	1.483e-10
112	ARHGEF40	PR_MULTI	14	21545230	rs12885183	14:21545230:A:G	G	A	0.2243	283907	0.4909	0.08	8.515e-10	0.2175	262426	0.4653	0.0842	3.234e-08	0.1655	8173	0.5793	0.6182	0.3487	0.3158	12823	0.8562	0.2891	0.003065	0.2165	272984	0.0205	0.0037	2.545e-08	0.2177	262426	0.0202	0.0037	6.395e-08
113	RP11-562L8.1	PR_MULTI	14	29750244	rs7146955	14:29750244:A:G	G	A	0.5895	293051	0.4449	0.0648	6.744e-12	0.5922	271570	0.4295	0.0676	2.073e-10	0.4097	8173	0.7366	0.438	0.09262	0.6175	12823	0.5717	0.2751	0.03766	0.586	282128	0.0208	0.003	1.873e-12	0.5925	271570	0.0205	0.003	1.142e-11
114	AKAP6	PR_MULTI	14	32923336	rs3784192	14:32923336:A:G	A	G	0.2033	293051	0.5451	0.082	2.994e-11	0.178	271570	0.5403	0.0866	4.304e-10	0.7873	8173	1.9161	0.5234	0.0002513	0.3121	12823	0.1706	0.3005	0.5702	0.2026	282128	0.0246	0.0038	7.182e-11	0.1779	271570	0.0232	0.0039	2.078e-09
115	NFKBIA	PR_MULTI	14	35871217	rs8904	14:35871217:A:G	G	A	0.6264	287252	0.4038	0.0669	1.563e-09	0.6317	265771	0.4438	0.0699	2.185e-10	0.6032	8173	0.2136	0.4297	0.6191	0.6412	12823	0.0683	0.2763	0.8047	0.6233	276329	0.0196	0.0031	1.552e-10	0.6321	265771	0.0208	0.0031	3.028e-11
116	SYNE2	PR_MULTI	14	64457638	rs1255908	14:64457638:G:T	T	G	0.6938	291546	0.5191	0.0691	6.034e-14	0.692	270065	0.5374	0.0719	7.897e-14	0.3617	8173	0.0542	0.4348	0.9008	0.7571	12823	0.5133	0.3143	0.1025	0.6902	280623	0.023	0.0031	2.914e-13	0.6923	270065	0.0236	0.0032	2.28e-13
117	FLRT2	PR_MULTI	14	86041160	rs17712080	14:86041160:A:G	G	A	0.7524	293050	0.4738	0.0744	1.962e-10	0.7472	271570	0.4844	0.0767	2.744e-10	0.074	8173	1.2888	0.8256	0.1185	0.8211	12822	0.5049	0.3363	0.1333	0.7507	282128	0.0217	0.0034	1.865e-10	0.748	271570	0.0222	0.0034	1.156e-10
118	RP11-1070N10.3	PR_MULTI	14	95983975	rs179145	14:95983975:A:G	A	G	0.3801	287627	0.4133	0.0665	5.244e-10	0.3682	266147	0.4344	0.0697	4.631e-10	0.5697	8173	0.1355	0.4427	0.7595	0.4813	12822	0.2787	0.2629	0.2892	0.376	276705	0.0188	0.003	7.757e-10	0.3689	266147	0.0195	0.0031	3.583e-10
119	MARK3	PR_MULTI	14	103851272	rs3759579	14:103851272:A:G	A	G	0.4112	287627	0.4214	0.0654	1.192e-10	0.4088	266147	0.4009	0.0683	4.402e-09	0.5521	8173	0.8444	0.432	0.05063	0.3918	12822	0.6237	0.2729	0.02227	0.4131	276705	0.0196	0.003	6.131e-11	0.4084	266147	0.0195	0.0031	1.959e-10
120	RBPMS2	PR_MULTI	15	65035979	rs3935716	15:65035979:A:G	A	G	0.1491	293051	0.614	0.0954	1.211e-10	0.1233	271570	0.6188	0.1012	9.628e-10	0.606	8173	1.3158	0.4353	0.002506	0.1643	12823	0.0069	0.3867	0.9858	0.1579	282128	0.0308	0.0043	1.391e-12	0.1229	271570	0.0293	0.0045	1.061e-10
121	CORO2B	PR_MULTI	15	69021265	rs11330601	15:69021265:D:I	I	D	0.5488	222818	0.4298	0.0758	1.432e-08	0.5324	201337	0.4575	0.0793	7.918e-09	0.7754	8173	0.5751	0.5652	0.3089	0.2858	12823	0.0166	0.2978	0.9556	0.5407	211895	0.0211	0.0035	2.257e-09	0.5327	201337	0.0214	0.0036	2.463e-09
122	HCN4	PR_MULTI	15	73664723	rs8039168	15:73664723:A:T	A	T	0.8344	293051	0.6002	0.0853	2.004e-12	0.8422	271570	0.6032	0.0903	2.401e-11	0.7175	8173	0.7261	0.4605	0.1148	0.7943	12823	0.5698	0.3212	0.07609	0.8359	282128	0.0267	0.0039	9.909e-12	0.8425	271570	0.0271	0.004	2.133e-11
123	ALPK3	PR_MULTI	15	85372645	rs6496452	15:85372645:A:T	A	T	0.5475	287628	0.5513	0.0645	1.263e-17	0.557	266147	0.5497	0.0674	3.302e-16	0.3321	8173	0.0093	0.4417	0.9832	0.479	12823	0.787	0.2649	0.002965	0.5486	276705	0.0235	0.003	1.916e-15	0.557	266147	0.0245	0.003	4.293e-16
124	LINC00924 - NR2F2	PR_MULTI	15	96460899	rs62008078	15:96460899:C:T	C	T	0.435	285649	0.4802	0.0663	4.363e-13	0.4469	264168	0.4784	0.0684	2.724e-12	0.843	8173	0.4011	0.5988	0.5029	0.2709	12823	0.7083	0.3056	0.02047	0.4417	274726	0.0211	0.003	2.42e-12	0.4478	264168	0.0216	0.0031	1.481e-12
125	SPSB3	PR_MULTI	16	1828030	rs35816944	16:1828030:A:G	G	A	0.9918	247100	2.6992	0.4447	1.277e-09	0.9917	234277	2.7029	0.4551	2.858e-09	NA	NA	NA	NA	NA	0.9941	12823	2.6225	2.0916	0.2099	0.9917	235414	0.1286	0.0204	2.763e-10	0.9917	234277	0.1283	0.0205	3.547e-10
126	SRL	PR_MULTI	16	4282284	rs79321945	16:4282284:A:C	C	A	0.7822	293051	0.5021	0.079	2.108e-10	0.7826	271570	0.493	0.0826	2.403e-09	0.8496	8173	0.8321	0.6247	0.1828	0.7605	12823	0.5422	0.3065	0.07693	0.7836	282128	0.0224	0.0036	7.247e-10	0.7818	271570	0.0219	0.0037	2.845e-09
127	MYH11	PR_EUR	16	15834729	rs72772025	16:15834729:C:T	T	C	0.2679	293051	0.3592	0.0732	9.106e-07	0.2739	271570	0.4135	0.075	3.522e-08	0.944	8173	2.3787	0.9512	0.01239	0.8388	12823	0.5426	0.3632	0.1352	0.2715	281365	0.0174	0.0033	1.708e-07	0.2738	271570	0.0182	0.0034	5.416e-08
128	LOC101927480 - LINC02140	PR_MULTI	16	54598337	rs1186818	16:54598337:A:G	G	A	0.2424	293051	0.4269	0.0743	9.02e-09	0.2402	271570	0.4149	0.0779	9.967e-08	0.2513	8173	0.3584	0.4794	0.4548	0.2694	12823	0.6005	0.2926	0.04016	0.2415	282128	0.0181	0.0034	9.887e-08	0.2405	271570	0.0184	0.0035	1.332e-07
129	CNOT1	PR_MULTI	16	58584772	rs7199856	16:58584772:G:T	G	T	0.2633	292217	0.5609	0.0723	8.621e-15	0.2599	270736	0.5313	0.0755	1.933e-12	0.158	8173	0.773	0.566	0.1721	0.3394	12823	0.9718	0.2866	0.000698	0.2576	281294	0.0238	0.0033	7.569e-13	0.2595	270736	0.024	0.0034	1.187e-12
130	LINC01082 - IRF8	PR_MULTI	16	86184639	rs904199	16:86184639:A:G	G	A	0.0842	287629	0.7303	0.1188	7.854e-10	0.0804	266148	0.6869	0.1254	4.328e-08	0.1723	8173	0.5409	0.584	0.3544	0.0809	12823	1.3992	0.4896	0.004266	0.0864	276706	0.0316	0.0054	4.697e-09	0.0809	266148	0.0314	0.0056	1.99e-08
131	ZFPM1	PR_MULTI	16	88553198	rs28634651	16:88553198:C:T	T	C	0.6127	261197	0.5119	0.0728	2.066e-12	0.6234	244017	0.4806	0.0757	2.197e-10	0.4678	3872	0.7549	0.7971	0.3436	0.4783	12823	1.0391	0.2873	0.0002982	0.6207	249511	0.0215	0.0033	9.517e-11	0.6233	244017	0.0219	0.0034	7.602e-11
132	MINK1	PR_MULTI	17	4801163	rs7774	17:4801163:A:C	A	C	0.3314	293051	0.4255	0.0694	8.625e-10	0.3274	271570	0.4572	0.0727	3.112e-10	0.4154	8173	0.2918	0.4559	0.5221	0.6419	12823	0.0356	0.277	0.8979	0.3304	282128	0.02	0.0032	3.327e-10	0.3265	271570	0.0204	0.0032	3.521e-10
133	EFCAB5	PR_MULTI	17	28312993	rs55866125	17:28312993:C:T	T	C	0.5185	293051	0.4211	0.0634	3.201e-11	0.5224	271570	0.4283	0.0663	1.026e-10	0.5454	8173	0.568	0.4164	0.1726	0.4467	12823	0.1941	0.2637	0.4617	0.5229	282128	0.0189	0.0029	8.342e-11	0.5229	271570	0.019	0.003	1.572e-10
134	CACNA1G	PR_MULTI	17	48666064	rs757416	17:48666064:C:T	T	C	0.6324	293051	0.6864	0.066	2.507e-25	0.6443	271570	0.7115	0.0691	7.534e-25	0.5242	8173	0.1533	0.4347	0.7243	0.5196	12823	0.694	0.2633	0.00839	0.6373	282128	0.0314	0.003	3.171e-25	0.6445	271570	0.0332	0.0031	8.133e-27
135	CSHL1	PR_MULTI	17	61987405	rs2006122	17:61987405:A:T	T	A	0.2677	293051	0.422	0.0725	5.795e-09	0.2716	271570	0.4328	0.0753	9.174e-09	0.2412	8173	0.6701	0.4925	0.1737	0.2087	12823	0.0077	0.3231	0.9811	0.2693	282128	0.0203	0.0033	8.2e-10	0.2707	271570	0.0196	0.0034	6.552e-09
136	PRKCA	PR_MULTI	17	64306133	rs9909004	17:64306133:C:T	C	T	0.4162	291623	0.3833	0.0645	2.863e-09	0.4172	270142	0.3462	0.0674	2.802e-07	0.3575	8173	0.5248	0.4356	0.2283	0.4196	12823	0.8957	0.2658	0.0007521	0.4169	280700	0.015	0.003	3.72e-07	0.4182	270142	0.0146	0.003	1.248e-06
137	CASKIN2	PR_EUR	17	73505172	rs7501873	17:73505172:A:G	G	A	0.2459	293051	0.3913	0.0781	5.376e-07	0.2223	271570	0.4518	0.0828	4.89e-08	0.4544	8173	0.3166	0.4457	0.4775	0.5677	12823	0.3022	0.2795	0.2796	0.2352	282128	0.0198	0.0036	3.794e-08	0.2221	271570	0.0205	0.0037	2.941e-08
138	AC100791.2	PR_MULTI	17	77781725	rs745570	17:77781725:A:G	G	A	0.5253	293051	0.3545	0.0643	3.429e-08	0.5133	271570	0.3345	0.0667	5.252e-07	0.7752	8173	0.766	0.4965	0.1229	0.6556	12823	0.5009	0.2804	0.07406	0.5203	282128	0.0161	0.0029	4.347e-08	0.5135	271570	0.0157	0.003	1.54e-07
139	CDH2	PR_MULTI	18	26339589	rs11083300	18:26339589:C:G	G	C	0.4579	293050	0.3524	0.0641	3.845e-08	0.445	271570	0.3432	0.0664	2.38e-07	0.8463	8173	0.3254	0.587	0.5793	0.5903	12822	0.6033	0.2744	0.02791	0.4528	282128	0.0157	0.0029	9.454e-08	0.4442	271570	0.016	0.003	7.94E-08*
140	GAREM	PR_MULTI	18	30029141	rs982521	18:30029141:C:T	C	T	0.1769	293050	0.7482	0.0852	1.685e-18	0.1583	271570	0.6724	0.0908	1.338e-13	0.4786	8173	1.0619	0.4164	0.01076	0.2261	12822	1.4982	0.3119	1.56e-06	0.1796	282128	0.0309	0.0039	3.058e-15	0.1578	271570	0.03	0.0041	1.726e-13
141	DTNA	PR_MULTI	18	32399259	rs1786595	18:32399259:C:T	C	T	0.7359	293050	0.4703	0.0721	6.934e-11	0.7327	271570	0.4922	0.0748	4.69e-11	0.2866	8173	0.2766	0.4576	0.5455	0.8167	12822	0.5187	0.345	0.1327	0.7322	282128	0.0207	0.0033	2.696e-10	0.7325	271570	0.0217	0.0033	8.153e-11
142	CCBE1	PR_MULTI	18	57138957	rs12961264	18:57138957:C:T	C	T	0.2299	293050	0.5135	0.0756	1.097e-11	0.2269	271570	0.5413	0.079	7.216e-12	0.3662	8173	0.4433	0.4274	0.2997	0.7997	12822	0.0085	0.3367	0.9798	0.2339	282128	0.0231	0.0034	1.934e-11	0.2276	271570	0.0227	0.0035	1.212e-10
143	STK11	PR_MULTI	19	1217560	rs3795063	19:1217560:C:G	C	G	0.651	268324	0.4929	0.0757	7.308e-11	0.643	251144	0.5192	0.0779	2.693e-11	0.8847	3872	0.7822	1.2747	0.5395	0.2195	12823	0.1242	0.334	0.7101	0.6464	256638	0.0241	0.0034	2.535e-12	0.6444	251144	0.0239	0.0035	5.104e-12
144	ZNF358	PR_MULTI	19	7581244	rs113394178	19:7581244:A:C	A	C	0.6032	212667	0.4561	0.0814	2.093e-08	0.6117	191186	0.4073	0.087	2.869e-06	0.5503	8173	0.6428	0.5009	0.1994	0.5428	12823	0.7973	0.2635	0.002483	0.6078	201744	0.019	0.0038	6.448e-07	0.6115	191186	0.0178	0.0039	5.496e-06
145	TMEM59L	PR_MULTI	19	18733355	rs111551996	19:18733355:G:T	G	T	0.9503	290902	0.954	0.1553	8.034e-10	0.9493	270065	0.9624	0.1594	1.582e-09	0.9899	7529	0.0941	2.3382	0.9679	0.9664	12823	1.0793	0.7298	0.1392	0.9497	279216	0.042	0.0071	2.852e-09	0.9493	270065	0.0426	0.0071	2.22e-09
146	RNF24 - SMOX	PR_MULTI	20	4031653	rs16989138	20:4031653:A:G	G	A	0.4298	291546	0.527	0.0653	7.051e-16	0.4266	270065	0.527	0.0683	1.17e-14	0.3624	8173	0.7555	0.431	0.0796	0.5064	12823	0.4399	0.267	0.09941	0.4253	280623	0.0247	0.003	1.376e-16	0.427	270065	0.0243	0.0031	1.676e-15
147	KIAA1755	PR_MULTI	20	36832526	rs6023939	20:36832526:A:C	C	A	0.535	293051	0.4378	0.0638	6.748e-12	0.533	271570	0.4548	0.0666	8.649e-12	0.3975	8173	0.0312	0.4352	0.9429	0.5411	12823	0.3967	0.2617	0.1295	0.5358	282128	0.021	0.0029	5.407e-13	0.5334	271570	0.0219	0.003	2.158e-13
148	DERL3	PR_MULTI	22	24183875	rs2070464	22:24183875:A:G	G	A	0.3811	291836	0.535	0.0662	6.247e-16	0.3787	270355	0.5348	0.069	9.55e-15	0.5868	8173	1.3309	0.4259	0.001778	0.332	12823	0.2888	0.2825	0.3066	0.3851	280913	0.0252	0.003	6.529e-17	0.378	270355	0.0243	0.0031	3.239e-15
149	PHF5A	PR_MULTI	22	41854446	rs9607805	22:41854446:C:T	T	C	0.7022	287628	0.4234	0.0726	5.624e-09	0.7306	266147	0.4352	0.0764	1.199e-08	0.3469	8173	0.2197	0.4462	0.6225	0.4555	12823	0.3584	0.2841	0.2072	0.7124	276705	0.0187	0.0033	1.883e-08	0.7302	266147	0.0195	0.0034	1.062e-08
12 genome-wide significant loci in the meta-analyses of rank-based inverse normal transformed PR interval
	CASQ2	INVN_PR_MULTI	1	116296510	rs6693356	1:116296510:A:T	A	T	0.3128	208068	0.4118	0.077	8.796e-08	0.315	186587	0.4084	0.0811	4.809e-07	0.1957	8173	1.1037	0.5193	0.03354	0.3203	12823	0.2972	0.281	0.2902	0.3118	197145	0.02	0.0035	1.298e-08	0.3151	186587	0.0194	0.0036	7.294e-08
	FBXL7	INVN_PR_EUR	5	15756880	rs35789613	5:15756880:D:I	D	I	0.8048	226107	0.3994	0.0917	1.332e-05	0.8049	204626	0.4822	0.0972	7.104e-07	0.1626	8173	1.3388	0.5633	0.01746	0.7919	12823	0.0203	0.3224	0.9498	0.8061	215184	0.0211	0.0043	9.241e-07	0.8046	204626	0.0246	0.0044	2.32e-08
	TRAM2	INVN_PR_EUR	6	52363728	rs1056706	6:52363728:C:T	T	C	0.4863	293051	0.3052	0.0636	1.601e-06	0.483	271570	0.3306	0.0663	6.147e-07	0.3226	8173	0.2548	0.4503	0.5715	0.4727	12823	0.0633	0.2648	0.8111	0.4906	282128	0.0156	0.0029	8.218e-08	0.4842	271570	0.0163	0.003	3.841e-08
	PHIP	INVN_PR_MULTI	6	79822924	rs9443645	6:79822924:C:T	T	C	0.4909	293051	0.3239	0.0637	3.624e-07	0.4974	271570	0.3487	0.0664	1.478e-07	0.2934	8173	0.204	0.4622	0.6589	0.5477	12823	0.0267	0.2635	0.9191	0.4922	282128	0.0166	0.0029	1.178e-08	0.4977	271570	0.0167	0.003	1.98e-08
	TAB2	INVN_PR_MULTI	6	149527668	rs607071	6:149527668:A:C	A	C	0.2334	293049	0.3805	0.075	3.843e-07	0.2372	271568	0.3665	0.0776	2.302e-06	0.2185	8173	0.8389	0.5042	0.09616	0.1586	12823	0.5174	0.3654	0.1568	0.2364	282126	0.0188	0.0034	3.191e-08	0.2374	271568	0.0185	0.0035	9.854e-08
	CNKSR3	INVN_PR_MULTI	6	154820203	rs2153071	6:154820203:A:G	G	A	0.6038	293051	0.3528	0.0652	6.248e-08	0.6046	271570	0.3621	0.068	1.012e-07	0.4637	8173	0.4461	0.4409	0.3116	0.6411	12823	0.1717	0.2721	0.5279	0.6018	282128	0.0171	0.003	1.04e-08	0.6058	271570	0.0174	0.003	1.08e-08
	PHF20L1	INVN_PR_MULTI	8	133812752	rs35464031	8:133812752:D:I	D	I	0.6941	226106	0.4065	0.0794	3.095e-07	0.6915	204626	0.4281	0.0832	2.661e-07	0.071	8173	0.0376	0.8308	0.9639	0.6978	12822	0.0831	0.2885	0.7733	0.6945	215184	0.0204	0.0037	4.357e-08	0.6911	204626	0.0206	0.0038	4.473e-08
	TMEM72-AS1	INVN_PR_MULTI	10	45386352	rs10793564	10:45386352:A:C	A	C	0.5741	293050	0.3348	0.0645	2.054e-07	0.5752	271570	0.3545	0.0673	1.397e-07	0.5093	8173	0.0826	0.4252	0.846	0.5829	12822	0.1622	0.2669	0.5433	0.5731	282128	0.0161	0.003	4.899e-08	0.5759	271570	0.0167	0.003	2.935e-08
	KLF12	INVN_PR_MULTI	13	74520186	rs1886512	13:74520186:A:T	T	A	0.634	293051	0.3522	0.0662	1.029e-07	0.6365	271570	0.3314	0.0691	1.632e-06	0.5287	8173	1.3401	0.4242	0.001581	0.6412	12823	0.2474	0.2775	0.3727	0.6321	282128	0.0167	0.003	3.468e-08	0.6361	271570	0.0149	0.0031	1.459e-06
	THSD4	INVN_PR_MULTI	15	71573665	rs2415114	15:71573665:C:T	T	C	0.2147	293051	0.4145	0.0777	9.715e-08	0.214	271570	0.443	0.0813	5.022e-08	0.2251	8173	0.6352	0.504	0.2076	0.7775	12823	0.1482	0.3177	0.6408	0.2155	282128	0.0207	0.0036	5.866e-09	0.2136	271570	0.0203	0.0036	2.402e-08
	CFDP1	INVN_PR_MULTI	16	75342846	rs10871308	16:75342846:C:T	C	T	0.2335	293051	0.3942	0.0757	1.93e-07	0.224	271570	0.3829	0.0796	1.485e-06	0.5245	8173	0.0215	0.4178	0.959	0.2448	12823	0.7103	0.3119	0.02278	0.2373	282128	0.0189	0.0035	4.349e-08	0.2241	271570	0.0196	0.0036	3.836e-08
	ENTPD6	INVN_PR_MULTI	20	25195018	rs3787076	20:25195018:C:T	C	T	0.8335	293050	0.4683	0.0885	1.232e-07	0.8536	271569	0.4932	0.0942	1.616e-07	0.4903	8173	0.7155	0.4225	0.09034	0.204	12823	0.0486	0.3375	0.8855	0.8274	282127	0.0228	0.004	1.82e-08	0.8537	271569	0.0216	0.0042	3.024e-07
	SMTN	INVN_PR_MULTI	22	31499518	rs9621187	22:31499518:A:G	A	G	0.5873	289966	0.3546	0.0654	5.914e-08	0.5791	268485	0.368	0.0678	5.666e-08	0.2564	8173	0.1131	0.4815	0.8144	0.6856	12823	0.2164	0.2976	0.4671	0.5828	279043	0.0165	0.003	3.302e-08	0.578	268485	0.0169	0.003	2.505e-08
64 previously reported loci for PR interval
	SCN5A/SCN10A	PR_MULTI	3	38767315	rs6801957	3:38767315:C:T	T	C	0.3991	292217	3.4865	0.0647	5.69E-634	0.4038	270736	3.4576	0.0672	3.42E-578	0.1608	8173	4.1792	0.5789	5.249e-13	0.3767	12823	3.7658	0.2677	6.166e-45	0.3986	281294	0.1582	0.003	1.44E-620	0.4037	270736	0.1581	0.003	4.46E-602
	MEIS1	PR_MULTI	2	66756976	rs3891585	2:66756976:A:G	A	G	0.3864	292110	1.3493	0.065	7.57e-96	0.389	270629	1.3302	0.0677	6.953e-86	0.4299	8173	2.3524	0.4155	1.5e-08	0.3245	12823	1.2157	0.2803	1.441e-05	0.3894	281187	0.0612	0.003	2.05e-94	0.3888	270629	0.0602	0.003	1.617e-87
	ARHGAP24	PR_MULTI	4	86657420	rs2624021	4:86657420:A:T	T	A	0.6791	293051	1.9786	0.0695	1.73e-178	0.7057	271570	1.9852	0.0725	5.81e-165	0.2367	8173	2.4314	0.4997	1.142e-06	0.4224	12823	1.8261	0.2814	8.57e-11	0.6905	282128	0.0916	0.0032	9.67e-182	0.7065	271570	0.0916	0.0032	3.64e-175
	FRMD4B	PR_MULTI	3	69402801	rs6795775	3:69402801:C:T	T	C	0.2852	288153	0.6572	0.0723	1.034e-19	0.2678	266672	0.6018	0.076	2.49e-15	0.6859	8173	1.9688	0.4591	1.799e-05	0.3679	12823	0.8599	0.2784	0.002009	0.2851	277230	0.029	0.0033	2.157e-18	0.2683	266672	0.0271	0.0034	1.406e-15
	FIGN	PR_MULTI	2	164347757	rs1531447	2:164347757:A:C	C	A	0.6189	293051	0.6962	0.0658	3.88e-26	0.6367	271570	0.6422	0.0688	1.007e-20	0.3096	8173	1.7935	0.4585	9.172e-05	0.4592	12823	1.0307	0.2663	0.0001086	0.6246	282128	0.0306	0.003	3.179e-24	0.6359	271570	0.0289	0.0031	6.58e-21
	ID2	PR_MULTI	2	8756183	rs6730558	2:8756183:C:T	T	C	0.3904	293051	1.1434	0.0656	5.883e-68	0.3781	271570	1.1179	0.0687	1.376e-59	0.6244	8173	1.6532	0.4378	0.0001595	0.4855	12823	1.3545	0.2645	3.036e-07	0.3876	282128	0.0518	0.003	2.227e-66	0.3782	271570	0.051	0.0031	6.65e-62
	CAV1/CAV2	PR_MULTI	7	116186241	rs3807989	7:116186241:A:G	A	G	0.4132	292217	1.9151	0.0644	2.61e-194	0.4079	270736	1.9113	0.0672	3.91e-178	0.645	8173	1.6594	0.4427	0.0001778	0.4139	12823	2.1013	0.2695	6.379e-15	0.4146	281294	0.0861	0.0029	7.24e-188	0.4072	270736	0.0871	0.003	3.27e-184
	KLHL38	PR_MULTI	8	124635197	rs4871397	8:124635197:C:G	G	C	0.0641	291835	1.1865	0.1349	1.439e-18	0.065	270355	1.139	0.14	4.064e-16	0.0637	8173	2.7904	0.8668	0.001286	0.0457	12822	1.2691	0.6387	0.04692	0.0651	280913	0.0546	0.0061	4.958e-19	0.0651	270355	0.053	0.0063	2.742e-17
	EOMES	PR_MULTI	3	27987232	rs612129	3:27987232:A:C	A	C	0.1764	293051	0.3373	0.0855	7.918e-05	0.1675	271570	0.3043	0.0903	0.0007491	0.1309	8173	1.9733	0.621	0.001486	0.2819	12823	0.3875	0.2978	0.1932	0.1674	282128	0.0147	0.004	0.000195	0.1682	271570	0.0133	0.004	0.0009671
	SLC35F1	PR_MULTI	6	118667522	rs11153730	6:118667522:C:T	T	C	0.5097	291623	0.9956	0.0641	2.54e-54	0.4956	270142	1.0179	0.0665	5.75e-53	0.7216	8173	1.4359	0.4741	0.002457	0.6994	12823	0.3489	0.2938	0.2351	0.5036	280700	0.0463	0.0029	2.212e-56	0.4962	270142	0.0464	0.003	1.141e-54
	TTN/CCDC141	PR_MULTI	2	179558366	rs2042995	2:179558366:C:T	C	T	0.2488	291546	0.8218	0.0752	8.296e-28	0.2244	270065	0.8345	0.0797	1.214e-25	0.5466	8173	1.194	0.4229	0.004746	0.4083	12823	0.5289	0.2725	0.05229	0.242	280623	0.0391	0.0035	1.307e-29	0.2241	270065	0.0384	0.0036	4.594e-27
	ZNF438	PR_MULTI	10	31324285	rs793090	10:31324285:A:G	G	A	0.6741	293051	0.2615	0.0674	0.0001048	0.6737	271570	0.2484	0.0704	0.0004178	0.7173	8173	1.214	0.4591	0.008189	0.6655	12823	0.2059	0.2778	0.4585	0.6728	282128	0.0113	0.0031	0.0002392	0.6726	271570	0.0103	0.0032	0.001112
	TBX20/HERPUD2	PR_MULTI	7	35412363	rs340397	7:35412363:G:T	T	G	0.3762	293051	0.6306	0.0655	6.232e-22	0.3647	271570	0.6487	0.0686	3.074e-21	0.4529	8173	1.1016	0.4168	0.008219	0.5194	12823	0.232	0.2669	0.3847	0.3692	282128	0.0292	0.003	2.066e-22	0.365	271570	0.0291	0.0031	2.377e-21
	NR3C1/ARHGAP26	PR_MULTI	5	142938663	rs1037100	5:142938663:A:G	G	A	0.5053	293050	0.4002	0.0634	2.704e-10	0.4966	271569	0.4222	0.066	1.599e-10	0.745	8173	1.221	0.4789	0.01079	0.4323	12823	0.1512	0.2622	0.5643	0.5036	282127	0.0192	0.0029	3.739e-11	0.4968	271569	0.0185	0.003	4.029e-10
	PHLDB2	PR_MULTI	3	111643561	rs2137897	3:111643561:C:T	T	C	0.2137	293051	0.6482	0.0776	6.778e-17	0.2186	271570	0.6745	0.08	3.315e-17	0.1428	8173	1.49	0.5865	0.01107	0.8736	12823	0.2418	0.3953	0.5406	0.2159	282128	0.0296	0.0035	5.256e-17	0.2184	271570	0.0297	0.0036	1.198e-16
	C20orf166	PR_MULTI	20	61178671	rs28414612	20:61178671:C:T	T	C	0.7529	280491	0.5666	0.0785	5.161e-13	0.7613	261405	0.5647	0.0823	7.038e-12	0.5293	7400	1.1803	0.4825	0.01444	0.7261	11686	0.3464	0.3064	0.2583	0.7526	269568	0.0271	0.0036	4.843e-14	0.7614	261405	0.0264	0.0037	7.03e-13
	CCNL1	PR_MULTI	3	156821808	rs6441111	3:156821808:C:T	C	T	0.5087	293051	0.9675	0.0639	1.02e-51	0.514	271570	0.972	0.0668	5.633e-48	0.3728	8173	1.0567	0.4385	0.01596	0.477	12823	0.8598	0.262	0.001032	0.5094	282128	0.0438	0.0029	8.918e-51	0.5144	271570	0.0447	0.003	1.342e-50
	TLE3	PR_MULTI	15	70446998	rs2004851	15:70446998:A:C	A	C	0.3253	283907	0.6339	0.0705	2.421e-19	0.328	262426	0.6146	0.0735	6.312e-17	0.1737	8173	1.3348	0.578	0.02092	0.3228	12823	0.7417	0.2792	0.007886	0.326	272984	0.03	0.0032	1.258e-20	0.3287	262426	0.0294	0.0033	2.672e-19
	CDH13	PR_MULTI	16	82754425	rs12443745	16:82754425:C:G	C	G	0.9091	282730	0.9432	0.1146	1.891e-16	0.9111	261249	0.9447	0.1204	4.215e-15	0.8448	8173	1.3394	0.593	0.02391	0.9196	12823	0.6295	0.4951	0.2035	0.907	271044	0.0415	0.0052	1.439e-15	0.9107	261249	0.0412	0.0054	1.731e-14
	SH3PXD2A/OBFC1	PR_MULTI	10	105524081	rs10883908	10:105524081:C:T	T	C	0.4096	293051	0.9787	0.0645	5.443e-52	0.4031	271570	1.0043	0.0674	3.306e-50	0.5656	8173	0.9396	0.4208	0.026*	0.4491	12823	0.5143	0.2675	0.05458	0.4095	282128	0.0441	0.0029	1.181e-50	0.4029	271570	0.0443	0.003	6.001e-49
	SYNPO2L	PR_MULTI	10	75421446	rs7394152	10:75421446:C:T	C	T	0.8467	293051	0.7932	0.0883	2.635e-19	0.8505	271570	0.823	0.0928	7.221e-19	0.737	8173	1.0608	0.4758	0.02578	0.8533	12823	0.3019	0.3692	0.4136	0.8445	282128	0.0372	0.004	2.614e-20	0.8507	271570	0.037	0.0042	5.496e-19
	SLC8A1	PR_MULTI	2	40743183	rs17026114	2:40743183:A:G	G	A	0.075	293051	1.2275	0.1377	5.021e-19	0.0491	271570	1.1036	0.1555	1.289e-12	0.1534	8173	1.1638	0.5775	0.04388	0.177	12823	1.8872	0.3493	6.56e-08	0.0663	282128	0.0481	0.0066	2.085e-13	0.0487	271570	0.0483	0.007	4.761e-12
	MKLN1	PR_MULTI	7	130973495	rs35680304	7:130973495:C:T	T	C	0.5777	293051	0.7603	0.0655	3.805e-31	0.5825	271570	0.7847	0.0678	5.158e-31	0.1483	8173	1.1783	0.607	0.05224	0.5903	12823	0.3121	0.2882	0.2789	0.5741	282128	0.0352	0.003	6.916e-32	0.5823	271570	0.0352	0.003	3.223e-31
	TBX5/TBX3	PR_MULTI	12	115349497	rs1124477	12:115349497:C:T	T	C	0.3102	293051	1.2151	0.0691	2.773e-69	0.3058	271570	1.2612	0.0722	2.529e-68	0.2441	8173	0.9364	0.4878	0.055*	0.3952	12823	0.555	0.2754	0.04387	0.3042	282128	0.0564	0.0032	8.528e-71	0.3049	271570	0.0569	0.0032	4.493e-69
	SLC25A26	PR_MULTI	3	66362206	rs1084537	3:66362206:C:T	T	C	0.3925	293051	0.5648	0.0658	9.664e-18	0.4012	271570	0.525	0.0681	1.311e-14	0.1575	8173	1.1147	0.5815	0.05525	0.294	12823	1.2199	0.2905	2.671e-05	0.3963	282128	0.0229	0.003	2.409e-14	0.4017	271570	0.0226	0.003	1.145e-13
	SOX5/C12orf67/LINC00477/BCAT1	PR_MULTI	12	24784139	rs4246224	12:24784139:A:G	G	A	0.8553	293050	2.2721	0.0907	1.69e-138	0.8546	271569	2.2427	0.0939	5.32e-126	0.968	8173	2.1576	1.1928	0.07048	0.8563	12823	2.768	0.3723	1.052e-13	0.8554	282127	0.1039	0.0042	1.81e-137	0.8543	271569	0.1035	0.0042	4.36e-134
	EPS15	PR_MULTI	1	51220017	rs72690486	1:51220017:G:T	T	G	0.9751	288203	2.3075	0.2204	1.192e-25	0.9746	270242	2.2989	0.2236	8.626e-25	0.0061	5138	7.7718	4.3576	0.07451	0.9909	12823	3.6157	1.3654	0.008093	0.9749	276517	0.1079	0.01	6.741e-27	0.9748	270242	0.1098	0.0101	1.156e-27
	SNORD56B	PR_MULTI	14	71983638	rs61989382	14:71983638:C:T	C	T	0.2459	293051	0.8629	0.0736	1.011e-31	0.2504	271570	0.8726	0.0761	2.004e-30	0.1578	8173	0.9483	0.5754	0.0993	0.1839	12823	0.7693	0.3446	0.0256	0.2484	282128	0.0391	0.0034	1.776e-31	0.2509	271570	0.0394	0.0034	5.433e-31
	NKX2-5/ATP6V0E1/C5orf41/BNIP1/CREBRF	PR_MULTI	5	172577403	rs29795	5:172577403:A:G	A	G	0.5699	290821	1.0051	0.0643	4.708e-55	0.5822	271250	1.0263	0.0669	4.546e-53	0.3675	7400	0.7296	0.452	0.1065	0.4367	11686	0.7832	0.2768	0.004664	0.5755	279898	0.0458	0.0029	1.436e-54	0.5827	271250	0.0463	0.003	7.716e-54
	OBSCN	PR_MULTI	1	228450868	rs287606	1:228450868:A:G	A	G	0.2891	293050	0.4386	0.0698	3.271e-10	0.2911	271569	0.441	0.0727	1.323e-09	0.2255	8173	0.7722	0.4979	0.1209	0.2783	12823	0.3933	0.2914	0.1771	0.2884	282127	0.02	0.0032	4.253e-10	0.2906	271569	0.0201	0.0033	6.316e-10
	KCND3	PR_MULTI	1	112560237	rs116532272	1:112560237:A:A	G	A	0.9783	272826	3.7446	0.2548	6.665e-49	0.9781	258457	3.7654	0.2559	5.36e-49	0.9955	2683	8.336	5.495	0.1293	0.0029	11686	0.6696	3.0634	0.827	0.9781	261140	0.1702	0.0114	5.175e-50	0.9781	258457	0.1697	0.0115	1.226e-49
	PDZRN3	PR_MULTI	3	73554922	rs4677294	3:73554922:A:T	T	A	0.6656	293051	0.8306	0.0683	4.796e-34	0.6581	271570	0.8052	0.0705	3.173e-30	0.8788	8173	1.0003	0.6606	0.13	0.7623	12823	1.2588	0.3085	4.504e-05	0.6621	282128	0.0371	0.0031	1.435e-32	0.6578	271570	0.0372	0.0032	5.202e-32
	LINC00670/MYOCD	PR_MULTI	17	12635871	rs35712872	17:12635871:A:G	G	A	0.2451	293051	1.1944	0.0768	1.712e-54	0.2508	271570	1.2133	0.0793	7.89e-53	0.1241	8173	1.009	0.6728	0.1337	0.1629	12823	0.9596	0.3587	0.007476	0.2482	282128	0.0545	0.0035	4.897e-55	0.251	271570	0.0552	0.0035	6.453e-55
	FERMT2	PR_MULTI	14	53321273	rs62003514	14:53321273:C:T	C	T	0.8198	227610	0.6815	0.0967	1.846e-12	0.8145	206129	0.6883	0.1	5.979e-12	0.9494	8173	1.3686	0.9759	0.1608	0.8889	12823	0.6645	0.4237	0.1169	0.8167	215924	0.0325	0.0045	3.054e-13	0.8143	206129	0.0329	0.0045	3.025e-13
	GJA1	PR_MULTI	6	122148562	rs763076	6:122148562:G:A	G	A	0.1279	293051	0.8503	0.1015	5.327e-17	0.1043	271570	0.898	0.1087	1.448e-16	0.4593	8173	0.5763	0.4234	0.1734	0.1489	12823	0.4433	0.3872	0.2522	0.1373	282128	0.0393	0.0046	1.977e-17	0.1038	271570	0.0404	0.0049	1.156e-16
	NCRNA00113	PR_MULTI	21	28870626	rs956645	21:28870626:C:T	T	C	0.0319	284692	0.9651	0.2067	3.023e-06	0.0324	268701	0.9112	0.2092	1.327e-05	0.0045	2683	6.828	5.504	0.2148	0.0103	12823	3.0614	1.4143	0.03041	0.0327	273006	0.0452	0.0093	1.111e-06	0.0328	268701	0.0442	0.0093	1.986e-06
	TOP1	PR_MULTI	20	40066117	rs2179452	20:40066117:A:T	T	A	0.8003	293051	0.4605	0.0819	1.897e-08	0.8231	271570	0.4758	0.0874	5.249e-08	0.5922	8173	0.5271	0.4259	0.2159	0.6511	12823	0.2635	0.2858	0.3567	0.8087	282128	0.0222	0.0038	4.077e-09	0.8242	271570	0.023	0.0039	4.214e-09
	FGFR1	PR_MULTI	8	38332249	rs881299	8:38332249:C:T	C	T	0.4035	293050	0.5828	0.0649	2.786e-19	0.4123	271570	0.5863	0.0673	3.006e-18	0.2818	8173	0.5693	0.4629	0.2187	0.2847	12822	0.5772	0.2979	0.05269	0.4078	282128	0.0263	0.003	6.2e-19	0.4118	271570	0.0269	0.003	4.942e-19
	XPO4/EFHA1	PR_MULTI	13	22103294	rs12869776	13:22103294:A:G	A	G	0.5976	293051	0.9825	0.065	1.232e-51	0.5902	271570	0.9789	0.0672	5.351e-48	0.8678	8173	0.697	0.6222	0.2626	0.6707	12823	1.1203	0.2824	7.262e-05	0.5954	282128	0.0456	0.003	4.2e-53	0.5902	271570	0.0462	0.003	5.13e-53
	PAM	PR_MULTI	5	102128958	rs114555443	5:102128958:C:T	C	T	0.0567	285725	1.7354	0.1542	2.15e-29	0.0578	266506	1.7185	0.1561	3.361e-28	0.0081	5911	3.195	2.8805	0.2674	0.0148	12823	2.068	1.0868	0.05707	0.0581	274039	0.0752	0.0069	2.058e-27	0.0584	266506	0.0745	0.007	8.566e-27
	FAT1	PR_MULTI	4	187623099	rs74772720	4:187623099:A:C	A	C	0.1428	291836	0.7261	0.0926	4.593e-15	0.1316	270355	0.7286	0.0984	1.297e-13	0.3309	8173	0.4954	0.4487	0.2695	0.1681	12823	0.9866	0.3565	0.005645	0.146	280913	0.0325	0.0042	1.518e-14	0.1324	270355	0.0338	0.0044	1.482e-14
	C6orf195	PR_MULTI	6	2575907	rs4959193	6:2575907:A:G	A	G	0.442	293051	0.4931	0.0642	1.614e-14	0.4489	271570	0.5027	0.0668	5.387e-14	0.3844	8173	0.4579	0.4273	0.2839	0.343	12823	0.3536	0.2824	0.2105	0.4463	282128	0.0223	0.0029	2.879e-14	0.4492	271570	0.0226	0.003	4.198e-14
	SKI	PR_MULTI	1	2144107	rs2503715	1:2144107:A:G	G	A	0.8653	279275	1.5966	0.1055	1.071e-51	0.862	257795	1.6269	0.109	2.176e-50	0.9517	8173	1.2082	1.1546	0.2954	0.9117	12822	1.2374	0.4677	0.008146	0.8642	267590	0.0734	0.0048	3.86e-52	0.8629	257795	0.0744	0.0049	1.65e-52
	SENP2	PR_MULTI	3	185351651	rs1816959	3:185351651:A:G	A	G	0.663	291623	0.4945	0.0674	2.155e-13	0.6632	270142	0.5077	0.0704	5.447e-13	0.6331	8173	0.4392	0.4414	0.3198	0.6724	12823	0.2669	0.2803	0.3411	0.6621	280700	0.0216	0.0031	2.335e-12	0.6631	270142	0.0218	0.0031	4.504e-12
	PPARGC1A	PR_MULTI	4	23826958	rs2970854	4:23826958:G:T	G	T	0.2608	293051	0.5675	0.0725	5.13e-15	0.2593	271570	0.5829	0.0754	1.114e-14	0.124	8173	0.5648	0.6468	0.3825	0.3135	12823	0.3706	0.2935	0.2067	0.2561	282128	0.0253	0.0033	3.352e-14	0.259	271570	0.0255	0.0034	4.729e-14
	FOXP1	PR_MULTI	3	71296578	rs74537277	3:71296578:C:G	C	G	0.0878	284167	0.8883	0.1155	1.481e-14	0.0858	262686	0.9142	0.1216	5.627e-14	0.1431	8173	0.5276	0.607	0.3847	0.0842	12823	0.785	0.4727	0.09674	0.0891	273244	0.0404	0.0053	2.142e-14	0.0855	262686	0.0411	0.0055	6.104e-14
	ADPRHL1	PR_MULTI	13	114078558	rs41306688	13:114078558:A:C	C	A	0.0467	264029	1.6546	0.1851	3.9e-19	0.0478	248266	1.6703	0.189	9.761e-19	0.0076	2455	5.139	5.939	0.3869	0.0197	12823	1.1067	0.9668	0.2523	0.048	253106	0.0708	0.0084	2.335e-17	0.0482	248266	0.0705	0.0084	4.106e-17
	TMEM182	PR_MULTI	2	103415494	rs2732814	2:103415494:A:G	A	G	0.4911	293051	0.771	0.0633	3.595e-34	0.4872	271570	0.78	0.066	3.026e-32	0.6467	8173	0.3417	0.4323	0.4293	0.4961	12823	0.7388	0.2643	0.005183	0.4917	282128	0.035	0.0029	9.515e-34	0.4865	271570	0.0352	0.003	8.632e-33
	MACF1	PR_MULTI	1	39654372	rs57214150	1:39654372:C:G	C	G	0.2114	293050	0.5926	0.0783	3.685e-14	0.214	271570	0.6008	0.0808	1.044e-13	0.9506	8173	0.6964	0.9909	0.4822	0.1862	12822	0.605	0.3377	0.07322	0.2118	282128	0.0271	0.0036	4.308e-14	0.2137	271570	0.0273	0.0036	4.999e-14
	KRTCAP2	PR_MULTI	1	155142927	rs4971089	1:155142927:A:G	A	G	0.4959	293051	0.664	0.0638	2.445e-25	0.5061	271570	0.6628	0.0664	1.923e-23	0.3234	8173	0.3079	0.4437	0.4878	0.3856	12823	0.9657	0.2757	0.0004613	0.4997	282128	0.0284	0.0029	1.841e-22	0.5062	271570	0.0293	0.003	5.263e-23
	AFF1	PR_MULTI	4	88030261	rs442177	4:88030261:G:T	T	G	0.5892	293051	0.4296	0.0644	2.569e-11	0.5891	271570	0.4397	0.0672	6.043e-11	0.4836	8173	0.2696	0.4197	0.5206	0.6361	12823	0.3383	0.273	0.2153	0.5867	282128	0.0198	0.0029	1.834e-11	0.5904	271570	0.0201	0.003	2.342e-11
	MYBPHL	PR_MULTI	1	109948138	rs34573869	1:109948138:D:I	D	I	0.0651	226107	0.9757	0.1522	1.46e-10	0.0671	204626	0.9815	0.1579	5.073e-10	0.967	8173	0.7466	1.1863	0.5291	0.0391	12823	1.3135	0.6727	0.05088	0.066	215184	0.0423	0.007	1.816e-09	0.0671	204626	0.0428	0.0072	2.205e-09
	HAND2	PR_MULTI	4	174458901	rs13131421	4:174458901:C:T	C	T	0.5338	293051	0.5857	0.0635	2.68e-20	0.5296	271570	0.6188	0.0662	9.443e-21	0.3894	8173	0.2516	0.4267	0.5554	0.5706	12823	0.4528	0.2634	0.08566	0.5324	282128	0.0258	0.0029	6.241e-19	0.5298	271570	0.0273	0.003	3.903e-20
	WNT11	PR_MULTI	11	75915139	rs94111	11:75915139:A:G	G	A	0.6388	293051	0.4198	0.0661	2.126e-10	0.6425	271570	0.4487	0.0692	9.173e-11	0.554	8173	0.194	0.4133	0.639*	0.6199	12823	0.0329	0.2672	0.902	0.6397	273041	0.0195	0.0031	2.676e-10	0.643	262483	0.0199	0.0032	2.845e-10
	ALDH18A1/SORBS1	PR_MULTI	10	97388579	rs10882644	10:97388579:C:T	T	C	0.3756	293051	0.7597	0.0659	8.851e-31	0.3792	271570	0.7896	0.0682	5.917e-31	0.1327	8173	0.2637	0.617	0.6691	0.3685	12823	0.4335	0.2804	0.1221	0.374	282128	0.0354	0.003	9.478e-32	0.3788	271570	0.0364	0.0031	9.96e-33
	FADS1/FADS2	PR_MULTI	11	61602458	rs138766446	11:61602458:D:I	I	D	0.7348	220072	0.6238	0.094	3.144e-11	0.7527	199728	0.6065	0.1001	1.353e-09	0.8045	8173	0.2266	0.5655	0.6887	0.5332	11686	0.8917	0.3144	0.00457	0.7508	209149	0.0275	0.0044	3.754e-10	0.7507	199728	0.0287	0.0045	1.945e-10
	CAMK2D	PR_MULTI	4	114425934	rs4834347	4:114425934:A:C	A	C	0.2494	288153	0.7834	0.0751	1.721e-25	0.2547	266672	0.8191	0.0769	1.8e-26	0.9541	8173	0.2791	1.0248	0.7853	0.1546	12823	0.203	0.3734	0.5868	0.2526	276467	0.0369	0.0034	3.223e-27	0.2547	266672	0.0375	0.0034	1.06e-27
	NAV2	PR_MULTI	11	20010351	rs2625322	11:20010351:A:G	G	A	0.7726	293050	0.5215	0.0755	4.941e-12	0.7729	271569	0.527	0.0789	2.369e-11	0.8293	8173	0.1498	0.5557	0.7875	0.7513	12823	0.4886	0.3005	0.104	0.7732	273040	0.0228	0.0035	1.1e-10	0.7729	262482	0.0233	0.0036	8.755e-11
	PLEC	PR_MULTI	8	145018354	rs11786896	8:145018354:C:T	T	C	0.0491	260885	1.0946	0.1643	2.687e-11	0.05	246934	1.1165	0.1679	2.973e-11	0.9837	644	1.029	6.309	0.8704	0.0269	12822	0.3172	0.8214	0.6993	0.0505	249200	0.048	0.0074	9.148e-11	0.0507	246934	0.0479	0.0074	1.2e-10
	CAB39L	PR_MULTI	13	49918175	rs35214871	13:49918175:G:T	T	G	0.1485	293051	0.7172	0.0923	7.626e-15	0.1514	271570	0.7357	0.0945	6.759e-15	0.0285	8173	0.2252	1.5088	0.8814	0.0926	12823	0.226	0.4559	0.6201	0.1502	281365	0.0342	0.0042	5.108e-16	0.1511	271570	0.034	0.0042	1.034e-15
	DCP1A/CACNA1D	PR_MULTI	3	53770588	rs6800641	3:53770588:A:G	G	A	0.2455	293051	0.4116	0.0739	2.596e-08	0.2442	271570	0.4262	0.0771	3.265e-08	0.3601	8173	0.062	0.4319	0.8858	0.201	12823	0.3062	0.3335	0.3585	0.2489	282128	0.0196	0.0034	5.632e-09	0.2442	271570	0.0197	0.0035	1.213e-08
	LRCH1	PR_MULTI	13	47244162	rs4245338	13:47244162:A:G	G	A	0.3528	293051	0.8203	0.0663	4.029e-35	0.3517	271570	0.8447	0.0692	2.972e-34	0.5073	8173	0.0029	0.4193	0.9945	0.3071	12823	0.8234	0.2855	0.003931	0.3564	282128	0.0377	0.003	1.222e-35	0.3515	271570	0.0389	0.0031	4.541e-36
	ZFPM2	PR_MULTI	8	106347897	rs72671655	8:106347897:A:T	T	A	0.9604	284877	1.7306	0.18	6.802e-22	0.9599	271570	1.6968	0.1854	5.496e-20	NA	NA	NA	NA	NA	0.969	12822	2.6246	0.7706	0.0006594	0.9592	273192	0.0743	0.0082	1.142e-19	0.9592	271570	0.0739	0.0082	2.224e-19
	IL25/MYH6	PR_MULTI	14	23904988	rs2754171	14:23904988:C:T	C	T	0.9759	260770	4.2627	0.2729	5.226e-55	0.9755	247947	4.2702	0.2756	3.751e-54	NA	NA	NA	NA	NA	0.9932	12823	3.885	1.9498	0.04631	0.975	249084	0.2014	0.0123	1.3e-60	0.975	247947	0.2009	0.0123	3.666e-60
