# Supplementary material for: Multi-ancestry GWAS of the electrocardiographic PR interval identifies 202 loci underlying cardiac conduction
Source: Nat Commun. 2020 May 21;11:2542. doi: 10.1038/s41467-020-15706-x (PMC7242331; doi:10.1038/s41467-020-15706-x)
Supplement: Supplementary file 12 — Supplementary Data 9 [file 41467_2020_15706_MOESM12_ESM.xlsx]

## Sheet: SD9 GWS loci in INVN_PR_ALL
Supplementary Data 9 Genome-wide significant loci outside the 64 previously reported loci in the multi-ancestry meta-analysis of rank-based inverse normal transformed residuals of PR interval.
There was no evidence of heterogeneity for any of the loci across individual studies (Pheterogeneity ≥ 0.001).
Nearest gene: nearest annotated gene(s) to the lead variant; Chr, chromosome; Position, physical position in build 37; EA, effect allele; OA, other allele; EAF, effect allele frequency; N, total sample size analyzed; beta, effect estimate is milliseconds; SE, standard error; P, P-value, GWS, genome-wide significant locus (P<5x10-8).
Nearest gene	Chr	Position	MarkerName	rsID	EA	OA	EAF	N	beta	SE	P	GWS locus in multi-ancestry meta-analysis of absolute PR interval	GWS locus in European meta-analysis of absolute PR interval
HSPG2	1	22282619	1:22282619:C:T	rs7529220	C	T	0.8415	282128	0.0258	0.0042	6.51e-10	Yes	Yes
AIM1L	1	26679041	1:26679041:C:T	rs12031946	C	T	0.1184	282129	0.0277	0.0046	2.441e-09	Yes	Yes
MAP7D1	1	36685738	1:36685738:A:G	rs500555	A	G	0.2841	278076	0.0193	0.0035	3.538e-08	Yes	Yes
EDN2	1	41955714	1:41955714:A:G	rs12751675	G	A	0.7514	282128	0.0265	0.0034	1.384e-14	Yes	Yes
SSBP3	1	54741767	1:54741767:C:T	rs603901	T	C	0.5723	282128	0.0194	0.003	5.291e-11	Yes	Yes
CDC7	1	91919440	1:91919440:A:G	rs7526795	G	A	0.6343	282128	0.0166	0.003	3.105e-08	Yes	Yes
CASQ2	1	116296510	1:116296510:A:T	rs6693356	A	T	0.3118	197145	0.02	0.0035	1.298e-08	No	No
GJA5	1	147281349	1:147281349:C:T	rs1692144	C	T	0.7915	282128	0.0291	0.0036	4.589e-16	Yes	Yes
PRRX1	1	170615724	1:170615724:A:T	rs61824887	A	T	0.8697	282128	0.0318	0.0044	3.637e-13	Yes	Yes
C1orf98	1	200271408	1:200271408:C:T	rs819636	C	T	0.3264	282128	0.0182	0.0031	5.703e-09	Yes	Yes
HLX	1	221138612	1:221138612:C:T	rs6678632	T	C	0.4368	282128	0.02	0.003	1.152e-11	Yes	Yes
ADCK3	1	227177193	1:227177193:A:G	rs3768421	A	G	0.4883	280623	0.0217	0.0029	9.978e-14	Yes	Yes
SIPA1L2	1	232690796	1:232690796:G:T	rs2483845	T	G	0.4585	276705	0.0242	0.003	1.927e-15	Yes	Yes
RYR2	1	237194922	1:237194922:A:G	rs10802580	G	A	0.77	275490	0.0207	0.0036	1.117e-08	Yes	Yes
SMYD3	1	246157144	1:246157144:A:G	rs28468565	A	G	0.6695	276705	0.0238	0.0032	7.108e-14	Yes	Yes
LINC01249	2	4824622	2:4824622:A:G	rs12616546	A	G	0.6855	282128	0.0221	0.0031	9.86e-13	Yes	Yes
STRN	2	37102249	2:37102249:A:G	rs17496249	A	G	0.5467	282128	0.0308	0.0029	4.9e-26	Yes	Yes
EML4	2	42537995	2:42537995:A:C	rs6728830	C	A	0.9635	280209	0.0468	0.0082	9.803e-09	Yes	Yes
EPAS1	2	46541176	2:46541176:C:T	rs11689011	T	C	0.4235	282128	0.0195	0.0029	3.875e-11	Yes	Yes
SPTBN1	2	54824815	2:54824815:A:G	rs4519566	G	A	0.78	282128	0.0265	0.0036	1.238e-13	Yes	Yes
FHL2-LOC285000	2	106104856	2:106104856:C:T	rs13006682	C	T	0.335	282128	0.0226	0.0031	3.814e-13	Yes	Yes
NCKAP5	2	134326085	2:134326085:A:C	rs17816356	A	C	0.0556	278038	0.0418	0.0071	3.231e-09	Yes	Yes
TEX41	2	145516060	2:145516060:A:G	rs11900456	A	G	0.2616	282128	0.0205	0.0033	7.202e-10	Yes	Yes
AC098617.1	2	192723128	2:192723128:A:T	rs58577564	A	T	0.1	280623	0.0351	0.005	2.461e-12	Yes	Yes
BMPR2	2	203211385	2:203211385:C:T	rs10165082	C	T	0.4915	282128	0.0181	0.0029	5.535e-10	No	Yes
AC007563.5	2	217628087	2:217628087:C:T	rs6435953	C	T	0.1671	282128	0.0221	0.0039	2.014e-08	No	Yes
TMEM198	2	220414019	2:220414019:C:T	rs13023533	T	C	0.5484	282128	0.0201	0.0029	7.745e-12	Yes	Yes
LSM3	3	14280870	3:14280870:G:T	rs4685090	G	T	0.7754	280913	0.0326	0.0035	1.185e-20	Yes	Yes
THRB	3	24465080	3:24465080:C:T	rs60325252	C	T	0.7058	282128	0.036	0.0032	1.864e-29	Yes	Yes
TRAK1	3	42103045	3:42103045:G:T	rs11921457	T	G	0.808	281378	0.0326	0.0039	8.051e-17	Yes	Yes
LAMB2	3	49544229	3:49544229:A:G	rs56324858	A	G	0.7767	281365	0.0223	0.0036	3.946e-10	Yes	Yes
TSC22D2	3	150176904	3:150176904:D:I	rs201481721	D	I	0.0333	212159	0.0604	0.0103	4.44e-09	Yes	Yes
RAP2B	3	153000092	3:153000092:C:T	rs4680046	T	C	0.4925	282128	0.0221	0.0029	3.292e-14	Yes	Yes
FNDC3B	3	171800256	3:171800256:A:G	rs4894803	G	A	0.3889	282123	0.0219	0.003	5.265e-13	Yes	Yes
FGF12	3	192373761	3:192373761:A:C	rs4687352	A	C	0.4028	282128	0.0246	0.0029	5.802e-17	Yes	Yes
DLG1	3	196867871	3:196867871:A:G	rs3773855	G	A	0.7357	282128	0.0191	0.0034	1.217e-08	Yes	Yes
SRD5A3	4	56123105	4:56123105:A:G	rs77422711	A	G	0.0173	262138	0.0743	0.0134	2.693e-08	Yes	Yes
LPHN3	4	62409950	4:62409950:C:G	rs67283284	G	C	0.3747	282128	0.0177	0.003	4.764e-09	Yes	Yes
FGF5	4	81202048	4:81202048:G:T	rs36034102	T	G	0.2657	281294	0.0195	0.0033	5.81e-09	Yes	Yes
PDLIM5	4	95537849	4:95537849:A:G	rs6854173	A	G	0.544	282128	0.0163	0.0029	2.55e-08	Yes	Yes
MYOZ2	4	120096381	4:120096381:C:T	rs56034803	T	C	0.2698	282128	0.0182	0.0033	2.869e-08	No	Yes
SLC12A7	5	1052360	5:1052360:C:T	rs3810854	C	T	0.4932	280149	0.0264	0.003	4.328e-19	Yes	Yes
SUB1	5	32629419	5:32629419:A:G	rs17441816	G	A	0.2946	282128	0.0217	0.0032	1.142e-11	Yes	Yes
HCN1	5	45864843	5:45864843:A:G	rs10039283	A	G	0.4109	282128	0.0269	0.003	1.4e-19	Yes	Yes
NR2F1-AS1	5	92439320	5:92439320:A:G	rs1496332	G	A	0.4804	282128	0.0194	0.0029	2.576e-11	Yes	Yes
FER	5	108042193	5:108042193:A:C	rs10223256	C	A	0.3036	282128	0.0183	0.0032	1.239e-08	No	Yes
STARD4-AS1	5	111046342	5:111046342:C:T	rs67968533	C	T	0.0903	282128	0.0308	0.0051	1.77e-09	Yes	Yes
LOC101927421-ZNF608	5	124343851	5:124343851:C:T	rs12654442	T	C	0.2586	282128	0.0204	0.0033	9.472e-10	Yes	Yes
FGF18	5	170868622	5:170868622:C:T	rs78810186	T	C	0.1122	279898	0.0345	0.0048	5.51e-13	Yes	Yes
LINC01411	5	173779209	5:173779209:A:T	rs4868384	T	A	0.4601	279413	0.0217	0.0029	1.393e-13	Yes	Yes
DSP	6	7527269	6:7527269:A:G	rs72825038	A	G	0.091	281365	0.0443	0.0052	1.861e-17	Yes	Yes
DEK	6	18227546	6:18227546:A:C	rs214502	A	C	0.5845	280623	0.0188	0.003	3.064e-10	Yes	Yes
HDGFL1	6	22570245	6:22570245:A:G	rs6900627	A	G	0.2713	279860	0.0251	0.0033	2.004e-14	Yes	Yes
CDKN1A	6	36647289	6:36647289:A:G	rs3176326	A	G	0.2005	282128	0.0275	0.0037	7.96e-14	Yes	Yes
TFEB	6	41664032	6:41664032:A:C	rs4541741	A	C	0.4724	282126	0.0206	0.0029	1.659e-12	Yes	Yes
RCAN2	6	46452619	6:46452619:C:T	rs871728	C	T	0.414	282128	0.0232	0.003	7.33e-15	Yes	Yes
PHIP	6	79822924	6:79822924:C:T	rs9443645	T	C	0.4922	282128	0.0166	0.0029	1.178e-08	No	No
LOC101927686	6	113978255	6:113978255:C:T	rs111739590	C	T	0.8112	281365	0.0218	0.0037	5.48e-09	Yes	Yes
TCF21	6	134214525	6:134214525:C:G	rs12190287	G	C	0.371	280056	0.0178	0.0031	9.131e-09	Yes	Yes
TAB2	6	149527668	6:149527668:A:C	rs607071	A	C	0.2364	282126	0.0188	0.0034	3.191e-08	No	No
CNKSR3	6	154820203	6:154820203:A:G	rs2153071	G	A	0.6018	282128	0.0171	0.003	1.04e-08	No	No
RP1-155D22.1	6	164532059	6:164532059:A:T	rs206708	A	T	0.7019	282128	0.0226	0.0032	2.48e-12	Yes	Yes
GET4	7	925949	7:925949:A:G	rs10226357	G	A	0.5888	282127	0.0189	0.003	2.521e-10	Yes	Yes
DGKB	7	14453835	7:14453835:A:G	rs56352403	G	A	0.6442	280700	0.0251	0.0031	4.486e-16	Yes	Yes
PRPS1L1	7	18040476	7:18040476:A:C	rs6961768	A	C	0.4341	282128	0.0168	0.003	1.299e-08	Yes	Yes
DNAH11	7	21617089	7:21617089:G:T	rs7803297	T	G	0.1711	282128	0.0268	0.0039	4.468e-12	Yes	Yes
ELMO1	7	37398113	7:37398113:C:G	rs4720244	C	G	0.6463	282128	0.0182	0.003	2.393e-09	Yes	No
SEMA3A	7	83998676	7:83998676:C:T	rs62472627	C	T	0.1442	281365	0.0276	0.0042	6.501e-11	Yes	Yes
DLC1	8	13130478	8:13130478:C:T	rs1188285	C	T	0.5596	282128	0.0203	0.0029	4.111e-12	Yes	Yes
MTUS1	8	17470693	8:17470693:C:T	rs3862082	T	C	0.4668	278751	0.0175	0.003	3.976e-09	Yes	Yes
XPO7	8	21775838	8:21775838:C:G	rs56317071	C	G	0.1172	282128	0.0271	0.0046	3.893e-09	Yes	No
RP11-1082L8.3	8	125859817	8:125859817:A:C	rs35006907	A	C	0.3154	282128	0.0216	0.0031	5.844e-12	Yes	Yes
PHF20L1	8	133812752	8:133812752:D:I	rs35464031	D	I	0.6945	215184	0.0204	0.0037	4.357e-08	No	No
PTK2	8	142006198	8:142006198:C:G	rs10106406	C	G	0.441	271807	0.018	0.003	2.647e-09	Yes	Yes
TRPM3	9	73426576	9:73426576:C:G	rs34322547	C	G	0.7389	202043	0.0248	0.0037	2.42e-11	Yes	Yes
RP11-15B24.5	9	85135643	9:85135643:A:G	rs1330830	G	A	0.6626	282128	0.0201	0.0031	1.744e-10	Yes	Yes
PLPP7	9	134203545	9:134203545:C:T	rs4584185	C	T	0.4473	267561	0.0216	0.0031	2.106e-12	Yes	Yes
BEND7	10	13534234	10:13534234:C:T	rs7916672	T	C	0.5818	282128	0.0163	0.0029	2.898e-08	Yes	No
CCDC7	10	32847962	10:32847962:C:G	rs2947080	G	C	0.642	282128	0.0172	0.003	1.118e-08	Yes	Yes
TMEM72-AS1	10	45386352	10:45386352:A:C	rs10793564	A	C	0.5731	282128	0.0161	0.003	4.899e-08	No	No
CEFIP	10	50507975	10:50507975:A:C	rs35326339	C	A	0.5305	282128	0.0186	0.0029	2.109e-10	Yes	Yes
TMEM26	10	63194576	10:63194576:A:G	rs74813029	A	G	0.1687	282128	0.0257	0.0039	3.377e-11	Yes	Yes
COL13A1	10	71559723	10:71559723:C:T	rs2642608	T	C	0.2741	282128	0.0188	0.0033	7.297e-09	Yes	Yes
ZMIZ1	10	81182802	10:81182802:A:G	rs12360384	G	A	0.556	282128	0.0197	0.003	3.381e-11	Yes	Yes
U3	10	88446633	10:88446633:A:T	rs1578895	T	A	0.7246	282128	0.0264	0.0033	3.155e-15	Yes	Yes
ADRB1	10	115782368	10:115782368:A:G	rs77334369	G	A	0.8926	282128	0.0286	0.0049	5.249e-09	Yes	Yes
FGFR2	10	123351302	10:123351302:A:G	rs2860197	G	A	0.4099	282128	0.0211	0.003	1.243e-12	Yes	Yes
MPPED2	11	30432176	11:30432176:C:T	rs553951	C	T	0.7246	273041	0.0182	0.0033	4.72e-08	Yes	No
PCNXL3	11	65391317	11:65391317:A:G	rs12801636	A	G	0.2331	282128	0.0191	0.0034	3.151e-08	Yes	No
CRYAB	11	111773296	11:111773296:C:T	rs11214037	C	T	0.7175	282128	0.0245	0.0033	5.381e-14	Yes	Yes
USP28	11	113666335	11:113666335:A:G	rs144789148	G	A	0.0471	278810	0.0461	0.0075	8.605e-10	Yes	Yes
PDE3A	12	20531641	12:20531641:C:T	rs1348581	T	C	0.7894	282126	0.0243	0.0036	1.132e-11	Yes	Yes
SSPN	12	26306484	12:26306484:C:T	rs78518764	T	C	0.8545	272278	0.0265	0.0044	2.033e-09	Yes	Yes
ARID2	12	46209520	12:46209520:C:T	rs76611452	T	C	0.0413	274730	0.0529	0.0084	3.004e-10	Yes	Yes
SRGAP1	12	64283014	12:64283014:A:G	rs17099893	A	G	0.0566	271826	0.0419	0.0065	1.181e-10	Yes	Yes
MIR6074	12	66409705	12:66409705:C:G	rs7979129	G	C	0.6397	273041	0.0169	0.0031	4.627e-08	Yes	Yes
SLC6A15	12	84806298	12:84806298:A:G	rs10862858	A	G	0.4335	282128	0.0208	0.0029	1.521e-12	Yes	Yes
HCFC2	12	104503806	12:104503806:A:G	rs2629745	A	G	0.877	282128	0.0295	0.0045	6.233e-11	Yes	Yes
RIC8B	12	107166122	12:107166122:C:G	rs3759310	G	C	0.3577	282128	0.0261	0.003	7.69e-18	Yes	Yes
UBE3B	12	109976893	12:109976893:G:T	rs2004359	G	T	0.4669	280913	0.0191	0.0029	7.196e-11	Yes	Yes
TESC	12	117487432	12:117487432:A:G	rs7968761	G	A	0.6374	277906	0.0193	0.0031	4.109e-10	Yes	Yes
FREM2	13	39256404	13:39256404:C:T	rs2496419	T	C	0.7419	282128	0.0192	0.0033	8.133e-09	Yes	Yes
KLF12	13	74520186	13:74520186:A:T	rs1886512	T	A	0.6321	282128	0.0167	0.003	3.468e-08	No	No
FGF14	13	102878269	13:102878269:C:T	rs9513995	T	C	0.7414	276705	0.0232	0.0034	8.015e-12	Yes	Yes
ARHGEF40	14	21542766	14:21542766:A:G	rs12889267	G	A	0.1645	272984	0.0231	0.0041	2.44e-08	Yes	Yes
RP11-562L8.1	14	29750244	14:29750244:A:G	rs7146955	G	A	0.586	282128	0.0208	0.003	1.873e-12	Yes	Yes
AKAP6	14	32923336	14:32923336:A:G	rs3784192	A	G	0.2026	282128	0.0246	0.0038	7.182e-11	Yes	Yes
NFKBIA	14	35871217	14:35871217:A:G	rs8904	G	A	0.6233	276329	0.0196	0.0031	1.552e-10	Yes	Yes
SYNE2	14	64474121	14:64474121:C:T	rs10498512	C	T	0.694	280623	0.0231	0.0032	2.645e-13	Yes	Yes
FLRT2	14	86041160	14:86041160:A:G	rs17712080	G	A	0.7507	282128	0.0217	0.0034	1.865e-10	Yes	Yes
RP11-1070N10.3	14	95983975	14:95983975:A:G	rs179145	A	G	0.376	276705	0.0188	0.003	7.757e-10	Yes	Yes
MARK3	14	103851272	14:103851272:A:G	rs3759579	A	G	0.4131	276705	0.0196	0.003	6.131e-11	Yes	Yes
RBPMS2	15	65089346	15:65089346:G:T	rs11071815	T	G	0.1576	282128	0.0313	0.0044	8.418e-13	Yes	Yes
CORO2B	15	69021265	15:69021265:D:I	rs11330601	I	D	0.5407	211895	0.0211	0.0035	2.257e-09	Yes	Yes
THSD4	15	71573665	15:71573665:C:T	rs2415114	T	C	0.2155	282128	0.0207	0.0036	5.866e-09	No	No
HCN4	15	73664723	15:73664723:A:T	rs8039168	A	T	0.8359	282128	0.0267	0.0039	9.909e-12	Yes	Yes
ALPK3	15	85335774	15:85335774:C:T	rs11073716	C	T	0.6147	276705	0.0242	0.003	9.115e-16	Yes	Yes
LINC00924-NR2F2	15	96460899	15:96460899:C:T	rs62008078	C	T	0.4417	274726	0.0211	0.003	2.42e-12	Yes	Yes
SPSB3	16	1828030	16:1828030:A:G	rs35816944	G	A	0.9917	235414	0.1286	0.0204	2.763e-10	Yes	Yes
SRL	16	4323967	16:4323967:C:T	rs3747570	T	C	0.7583	274294	0.0219	0.0035	2.725e-10	Yes	Yes
CNOT1	16	58584772	16:58584772:G:T	rs7199856	G	T	0.2576	281294	0.0238	0.0033	7.569e-13	Yes	Yes
CFDP1	16	75342846	16:75342846:C:T	rs10871308	C	T	0.2373	282128	0.0189	0.0035	4.349e-08	No	No
LINC01082-IRF8	16	86122524	16:86122524:A:G	rs13336880	A	G	0.2238	273620	0.0226	0.0037	1.627e-09	Yes	Yes
ZFPM1	16	88508781	16:88508781:C:G	rs8045886	C	G	0.7297	258195	0.0238	0.0036	2.964e-11	Yes	Yes
MINK1	17	4801163	17:4801163:A:C	rs7774	A	C	0.3304	282128	0.02	0.0032	3.327e-10	Yes	Yes
EFCAB5	17	28312993	17:28312993:C:T	rs55866125	T	C	0.5229	282128	0.0189	0.0029	8.342e-11	Yes	Yes
CACNA1G	17	48665675	17:48665675:A:G	rs1548531	G	A	0.6499	282128	0.0322	0.0031	9.094e-26	Yes	Yes
CSHL1	17	61987405	17:61987405:A:T	rs2006122	T	A	0.2693	282128	0.0203	0.0033	8.2e-10	Yes	Yes
CASKIN2	17	73502118	17:73502118:A:G	rs28558885	G	A	0.2178	282128	0.0199	0.0036	3.149e-08	No	Yes
AC100791.2	17	77781725	17:77781725:A:G	rs745570	G	A	0.5203	282128	0.0161	0.0029	4.347e-08	Yes	No
GAREM	18	30009759	18:30009759:A:G	rs10468904	G	A	0.1773	282128	0.031	0.0039	1.653e-15	Yes	Yes
DTNA	18	32418265	18:32418265:A:G	rs1954861	G	A	0.7253	282128	0.0209	0.0033	1.273e-10	Yes	Yes
CCBE1	18	57138957	18:57138957:C:T	rs12961264	C	T	0.2339	282128	0.0231	0.0034	1.934e-11	Yes	Yes
STK11	19	1217560	19:1217560:C:G	rs3795063	C	G	0.6464	256638	0.0241	0.0034	2.535e-12	Yes	Yes
TMEM59L	19	18733355	19:18733355:G:T	rs111551996	G	T	0.9497	279216	0.042	0.0071	2.852e-09	Yes	Yes
RNF24-SMOX	20	4031653	20:4031653:A:G	rs16989138	G	A	0.4253	280623	0.0247	0.003	1.376e-16	Yes	Yes
ENTPD6	20	25195018	20:25195018:C:T	rs3787076	C	T	0.8274	282127	0.0228	0.004	1.82e-08	No	No
KIAA1755	20	36841914	20:36841914:A:G	rs3746471	G	A	0.5418	282128	0.0213	0.0029	4.243e-13	Yes	Yes
DERL3	22	24183875	22:24183875:A:G	rs2070464	G	A	0.3851	280913	0.0252	0.003	6.529e-17	Yes	Yes
SMTN	22	31499518	22:31499518:A:G	rs9621187	A	G	0.5828	279043	0.0165	0.003	3.302e-08	No	No
PHF5A	22	41618880	22:41618880:G:T	rs5758266	G	T	0.7123	276705	0.019	0.0032	4.231e-09	Yes	Yes
