# Supplementary material for: Multi-ancestry GWAS of the electrocardiographic PR interval identifies 202 loci underlying cardiac conduction
Source: Nat Commun. 2020 May 21;11:2542. doi: 10.1038/s41467-020-15706-x (PMC7242331; doi:10.1038/s41467-020-15706-x)
Supplement: Supplementary file 13 — Supplementary Data 10 [file 41467_2020_15706_MOESM13_ESM.xlsx]

## Sheet: SD10 GWS loci in INVN_PR_EUR
Supplementary Data 10 Genome-wide significant loci outside the 64 previously reported loci in the European meta-analysis of rank-based inverse normal transformed residuals of PR interval.
There was no evidence of heterogeneity for any of the loci across individual studies (Pheterogeneity ≥ 0.001).
Nearest gene: nearest annotated gene(s) to the lead variant; Chr, chromosome; Position, physical position in build 37; EA, effect allele; OA, other allele; EAF, effect allele frequency; N, total sample size analyzed; beta, effect estimate is milliseconds; SE, standard error; P, P-value, GWS, genome-wide significant locus (P<5x10-8).
Nearest gene	Chr	Position	MarkerName	rsID	EA	OA	EAF	N	beta	SE	P	GWS locus in multi-ancestry meta-analysis of absolute PR interval	GWS locus in European meta-analysis of absolute PR interval
HSPG2	1	22283991	1:22283991:A:C	rs4655001	A	C	0.8829	271570	0.0277	0.0047	3.521e-09	Yes	Yes
AIM1L	1	26619989	1:26619989:C:T	rs10794527	T	C	0.0764	271570	0.0334	0.0057	4.522e-09	Yes	Yes
MAP7D1	1	36685738	1:36685738:A:G	rs500555	A	G	0.2869	268281	0.0201	0.0035	1.215e-08	Yes	Yes
EDN2	1	41955714	1:41955714:A:G	rs12751675	G	A	0.7487	271570	0.026	0.0035	6.837e-14	Yes	Yes
SSBP3	1	54726088	1:54726088:A:C	rs702496	C	A	0.5512	271570	0.0186	0.003	6.799e-10	Yes	Yes
CDC7	1	91941500	1:91941500:A:G	rs66507060	G	A	0.6454	271570	0.018	0.0031	7.264e-09	Yes	Yes
GJA5	1	147281349	1:147281349:C:T	rs1692144	C	T	0.7918	271570	0.0288	0.0037	4.053e-15	Yes	Yes
PRRX1	1	170645489	1:170645489:C:T	rs2150026	T	C	0.7044	266672	0.0239	0.0033	7.388e-13	Yes	Yes
C1orf98	1	200271408	1:200271408:C:T	rs819636	C	T	0.3277	271570	0.0181	0.0032	1.365e-08	Yes	Yes
HLX	1	221138612	1:221138612:C:T	rs6678632	T	C	0.4277	271570	0.0207	0.003	5.346e-12	Yes	Yes
ADCK3	1	227174145	1:227174145:C:T	rs7552783	C	T	0.4965	270065	0.0223	0.003	5.913e-14	Yes	Yes
SIPA1L2	1	232690086	1:232690086:A:G	rs2243857	A	G	0.4637	266147	0.0244	0.0031	2.571e-15	Yes	Yes
RYR2	1	237194922	1:237194922:A:G	rs10802580	G	A	0.7681	264932	0.021	0.0037	9.598e-09	Yes	Yes
SMYD3	1	246157144	1:246157144:A:G	rs28468565	A	G	0.6837	266147	0.0247	0.0032	1.918e-14	Yes	Yes
LINC01249	2	4824073	2:4824073:A:G	rs1470475	G	A	0.6883	271570	0.0234	0.0032	2.185e-13	Yes	Yes
STRN	2	37102249	2:37102249:A:G	rs17496249	A	G	0.5431	271570	0.0313	0.003	9.247e-26	Yes	Yes
EML4	2	42537995	2:42537995:A:C	rs6728830	C	A	0.9641	270295	0.0476	0.0083	8.904e-09	Yes	Yes
EPAS1	2	46541176	2:46541176:C:T	rs11689011	T	C	0.4146	271570	0.0196	0.003	7.367e-11	Yes	Yes
SPTBN1	2	54882381	2:54882381:A:G	rs2271329	G	A	0.7999	271570	0.0269	0.0037	5.296e-13	Yes	Yes
FHL2-LOC285000	2	106104856	2:106104856:C:T	rs13006682	C	T	0.337	271570	0.0217	0.0032	8.099e-12	Yes	Yes
NCKAP5	2	134326085	2:134326085:A:C	rs17816356	A	C	0.0558	271570	0.0415	0.0071	4.398e-09	Yes	Yes
TEX41	2	145453968	2:145453968:A:G	rs76909456	G	A	0.2418	271570	0.0205	0.0035	3.555e-09	Yes	Yes
AC098617.1	2	192723128	2:192723128:A:T	rs58577564	A	T	0.0952	270065	0.034	0.0052	5.374e-11	Yes	Yes
BMPR2	2	203352937	2:203352937:A:G	rs6751210	G	A	0.4949	271570	0.0175	0.003	3.451e-09	No	Yes
AC007563.5	2	217628087	2:217628087:C:T	rs6435953	C	T	0.1609	271570	0.023	0.0041	1.435e-08	No	Yes
TMEM198	2	220414019	2:220414019:C:T	rs13023533	T	C	0.5478	271570	0.0193	0.003	1.319e-10	Yes	Yes
LSM3	3	14280870	3:14280870:G:T	rs4685090	G	T	0.7819	270355	0.0317	0.0036	1.31e-18	Yes	Yes
THRB	3	24464955	3:24464955:A:G	rs59212267	G	A	0.7027	271570	0.0351	0.0032	2.456e-27	Yes	Yes
TRAK1	3	42103045	3:42103045:G:T	rs11921457	T	G	0.8066	270820	0.0335	0.004	2.622e-17	Yes	Yes
LAMB2	3	49544229	3:49544229:A:G	rs56324858	A	G	0.7746	271570	0.0223	0.0036	4.876e-10	Yes	Yes
TSC22D2	3	150176904	3:150176904:D:I	rs201481721	D	I	0.0335	204626	0.06	0.0104	7.403e-09	Yes	Yes
RAP2B	3	153000092	3:153000092:C:T	rs4680046	T	C	0.4854	271570	0.0222	0.003	6.456e-14	Yes	Yes
FNDC3B	3	171785168	3:171785168:C:G	rs9647379	C	G	0.3996	271570	0.0219	0.0031	1.068e-12	Yes	Yes
FGF12	3	192369093	3:192369093:A:G	rs9809169	G	A	0.3996	271570	0.0242	0.003	1.004e-15	Yes	Yes
DLG1	3	196799232	3:196799232:D:I	rs143879787	I	D	0.726	204626	0.0225	0.004	1.754e-08	Yes	Yes
SRD5A3	4	56123105	4:56123105:A:G	rs77422711	A	G	0.0173	262138	0.0743	0.0134	2.693e-08	Yes	Yes
LPHN3	4	62409801	4:62409801:C:G	rs28540500	C	G	0.3794	271570	0.0177	0.0031	7.947e-09	Yes	Yes
FGF5	4	81206377	4:81206377:A:T	rs4690116	A	T	0.4265	268637	0.017	0.003	1.968e-08	Yes	Yes
PDLIM5	4	95506214	4:95506214:A:G	rs2172448	A	G	0.5481	266672	0.0169	0.003	1.759e-08	Yes	Yes
MYOZ2	4	120096381	4:120096381:C:T	rs56034803	T	C	0.2727	271570	0.0187	0.0033	2.071e-08	No	Yes
SLC12A7	5	1066400	5:1066400:A:G	rs182271072	A	G	0.9851	245787	0.1325	0.0149	6.14e-19	Yes	Yes
FBXL7	5	15756880	5:15756880:D:I	rs35789613	D	I	0.8046	204626	0.0246	0.0044	2.32e-08	No	No
SUB1	5	32616255	5:32616255:C:T	rs922000	T	C	0.3123	271569	0.0213	0.0032	2.485e-11	Yes	Yes
HCN1	5	45864843	5:45864843:A:G	rs10039283	A	G	0.4011	271570	0.0268	0.003	9.387e-19	Yes	Yes
NR2F1	5	92455655	5:92455655:A:G	rs4869412	G	A	0.473	271570	0.0202	0.003	8.275e-12	Yes	Yes
FER	5	108042193	5:108042193:A:C	rs10223256	C	A	0.2901	271570	0.0186	0.0033	1.489e-08	No	Yes
STARD4	5	111046342	5:111046342:C:T	rs67968533	C	T	0.0882	271570	0.0313	0.0053	2.954e-09	Yes	Yes
LOC101927421-ZNF608	5	124351539	5:124351539:A:G	rs6883400	A	G	0.2442	265771	0.0215	0.0035	6.259e-10	Yes	Yes
FGF18	5	170868622	5:170868622:C:T	rs78810186	T	C	0.1128	271250	0.0353	0.0048	3.336e-13	Yes	Yes
LINC01411	5	173779209	5:173779209:A:T	rs4868384	T	A	0.4634	271250	0.0215	0.003	5.32e-13	Yes	Yes
DSP	6	7518915	6:7518915:C:T	rs112019128	T	C	0.0943	271570	0.0448	0.0053	1.551e-17	Yes	Yes
DEK	6	18227546	6:18227546:A:C	rs214502	A	C	0.5916	270065	0.0197	0.003	1.1e-10	Yes	Yes
HDGFL1	6	22570245	6:22570245:A:G	rs6900627	A	G	0.2727	270065	0.0248	0.0033	1.205e-13	Yes	Yes
CDKN1A	6	36647289	6:36647289:A:G	rs3176326	A	G	0.2011	271570	0.0273	0.0038	3.618e-13	Yes	Yes
TFEB	6	41658889	6:41658889:C:T	rs1015149	T	C	0.469	271570	0.0199	0.003	2.464e-11	Yes	Yes
RCAN2	6	46472377	6:46472377:A:G	rs4585546	G	A	0.3978	271570	0.0234	0.003	1.01e-14	Yes	Yes
TRAM2	6	52363728	6:52363728:C:T	rs1056706	T	C	0.4842	271570	0.0163	0.003	3.841e-08	No	No
PHIP	6	79822924	6:79822924:C:T	rs9443645	T	C	0.4977	271570	0.0167	0.003	1.98e-08	No	No
LOC101927686	6	113973847	6:113973847:C:T	rs56313227	C	T	0.8129	271570	0.0224	0.0038	5.211e-09	Yes	Yes
TCF21	6	134214525	6:134214525:C:G	rs12190287	G	C	0.3745	270142	0.0174	0.0031	2.76e-08	Yes	Yes
CNKSR3	6	154820279	6:154820279:C:G	rs2153072	C	G	0.6048	271570	0.0174	0.003	1.025e-08	No	No
RP1-155D22.1	6	164528867	6:164528867:A:T	rs206705	T	A	0.6945	271570	0.0221	0.0032	9.21e-12	Yes	Yes
GET4	7	925949	7:925949:A:G	rs10226357	G	A	0.5913	271569	0.0195	0.003	1.471e-10	Yes	Yes
DGKB	7	14453835	7:14453835:A:G	rs56352403	G	A	0.6405	270142	0.0258	0.0031	1.721e-16	Yes	Yes
PRPS1L1	7	18040476	7:18040476:A:C	rs6961768	A	C	0.4255	271570	0.0172	0.003	1.415e-08	Yes	Yes
DNAH11	7	21615938	7:21615938:A:G	rs7797607	G	A	0.4078	270065	0.0206	0.003	8.9e-12	Yes	Yes
SEMA3A	7	83998676	7:83998676:C:T	rs62472627	C	T	0.1453	271570	0.027	0.0042	1.875e-10	Yes	Yes
DLC1	8	13130478	8:13130478:C:T	rs1188285	C	T	0.5584	271570	0.0201	0.003	1.574e-11	Yes	Yes
MTUS1	8	17550623	8:17550623:A:G	rs4921804	G	A	0.6212	268192	0.0183	0.0031	3.037e-09	Yes	Yes
AZIN1	8	103914366	8:103914366:A:C	rs565720	A	C	0.7711	271570	0.0193	0.0035	4.424e-08	No	Yes
RP11-1082L8.3	8	125867834	8:125867834:A:T	rs55679363	T	A	0.3199	271570	0.0228	0.0032	8.431e-13	Yes	Yes
PHF20L1	8	133812752	8:133812752:D:I	rs35464031	D	I	0.6911	204626	0.0206	0.0038	4.473e-08	No	No
PTK2	8	142006198	8:142006198:C:G	rs10106406	C	G	0.4313	261249	0.0181	0.0031	4.002e-09	Yes	Yes
TRPM3	9	73496967	9:73496967:G:T	rs17471974	G	T	0.1789	271570	0.0255	0.0039	6.606e-11	Yes	Yes
RP11-15B24.5	9	85135915	9:85135915:A:C	rs7043482	A	C	0.6717	271569	0.021	0.0032	5.709e-11	Yes	Yes
PLPP7	9	134203545	9:134203545:C:T	rs4584185	C	T	0.44	257003	0.0216	0.0031	5.801e-12	Yes	Yes
CCDC7	10	32847962	10:32847962:C:G	rs2947080	G	C	0.6432	271570	0.0172	0.0031	2.326e-08	Yes	Yes
KLF12	10	45386352	10:45386352:A:C	rs10793564	A	C	0.5759	271570	0.0167	0.003	2.935e-08	No	No
CEFIP	10	50510406	10:50510406:C:T	rs10776558	C	T	0.5244	271570	0.0185	0.003	4.144e-10	Yes	Yes
TMEM26	10	63227521	10:63227521:A:T	rs2393843	A	T	0.1766	271570	0.0255	0.0039	7.159e-11	Yes	Yes
COL13A1	10	71559723	10:71559723:C:T	rs2642608	T	C	0.2772	271570	0.02	0.0033	1.363e-09	Yes	Yes
ZMIZ1	10	80898969	10:80898969:G:T	rs1769758	T	G	0.4964	245983	0.0229	0.0034	2.611e-11	Yes	Yes
U3	10	88446633	10:88446633:A:T	rs1578895	T	A	0.7346	271570	0.0266	0.0034	8.927e-15	Yes	Yes
ADRB1	10	115782061	10:115782061:A:G	rs67234920	G	A	0.9034	271570	0.028	0.005	2.75e-08	Yes	Yes
FGFR2	10	123348662	10:123348662:G:T	rs2912774	T	G	0.4144	266672	0.0219	0.0031	8.501e-13	Yes	Yes
MPPED2	11	30432176	11:30432176:C:T	rs553951	C	T	0.7343	262483	0.0188	0.0034	4.096e-08	Yes	No
CRYAB	11	111773296	11:111773296:C:T	rs11214037	C	T	0.7157	271570	0.0234	0.0033	1.572e-12	Yes	Yes
USP28	11	113666335	11:113666335:A:G	rs144789148	G	A	0.0474	271277	0.0463	0.0075	8.26e-10	Yes	Yes
PDE3A	12	20531641	12:20531641:C:T	rs1348581	T	C	0.8007	271568	0.0265	0.0037	8.006e-13	Yes	Yes
SSPN	12	26306484	12:26306484:C:T	rs78518764	T	C	0.8535	262483	0.0261	0.0044	4.188e-09	Yes	Yes
ARID2	12	46209520	12:46209520:C:T	rs76611452	T	C	0.0415	267970	0.0525	0.0084	4.763e-10	Yes	Yes
SRGAP1	12	64284283	12:64284283:A:G	rs4346062	G	A	0.0559	261267	0.0392	0.0067	4.426e-09	Yes	Yes
SLC6A15	12	84923377	12:84923377:A:G	rs2468307	A	G	0.4272	271570	0.0216	0.003	6.885e-13	Yes	Yes
HCFC2	12	104503806	12:104503806:A:G	rs2629745	A	G	0.8781	271570	0.03	0.0046	5.042e-11	Yes	Yes
RIC8B	12	107162965	12:107162965:A:G	rs10778510	A	G	0.3507	271570	0.0259	0.0031	7.404e-17	Yes	Yes
UBE3B	12	109976893	12:109976893:G:T	rs2004359	G	T	0.4717	270355	0.0191	0.003	1.599e-10	Yes	Yes
TESC	12	117498998	12:117498998:C:G	rs10850751	C	G	0.6466	268485	0.0189	0.0031	1.61e-09	Yes	Yes
FREM2	13	39250862	13:39250862:A:G	rs2122212	A	G	0.7068	271570	0.0192	0.0033	4.408e-09	Yes	Yes
FGF14	13	102905326	13:102905326:A:G	rs4468459	G	A	0.7363	266147	0.022	0.0034	1.345e-10	Yes	Yes
RP11-562L8.1	14	29772185	14:29772185:G:T	rs10162525	T	G	0.5938	271570	0.0206	0.003	9.267e-12	Yes	Yes
AKAP6	14	32922601	14:32922601:C:T	rs10141964	T	C	0.1785	271570	0.0233	0.0039	1.624e-09	Yes	Yes
NFKBIA	14	35871217	14:35871217:A:G	rs8904	G	A	0.6321	265771	0.0208	0.0031	3.028e-11	Yes	Yes
SYNE2	14	64457638	14:64457638:G:T	rs1255908	T	G	0.6923	270065	0.0236	0.0032	2.28e-13	Yes	Yes
FLRT2	14	86041160	14:86041160:A:G	rs17712080	G	A	0.748	271570	0.0222	0.0034	1.156e-10	Yes	Yes
RP11-1070N10.3	14	95983975	14:95983975:A:G	rs179145	A	G	0.3689	266147	0.0195	0.0031	3.583e-10	Yes	Yes
MARK3	14	103851272	14:103851272:A:G	rs3759579	A	G	0.4084	266147	0.0195	0.0031	1.959e-10	Yes	Yes
RBPMS2	15	65035979	15:65035979:A:G	rs3935716	A	G	0.1229	271570	0.0293	0.0045	1.061e-10	Yes	Yes
CORO2B	15	69021265	15:69021265:D:I	NA	I	D	0.5327	201337	0.0214	0.0036	2.463e-09	Yes	Yes
THSD4	15	71573665	15:71573665:C:T	rs2415114	T	C	0.2136	271570	0.0203	0.0036	2.402e-08	No	No
HCN4	15	73664723	15:73664723:A:T	rs8039168	A	T	0.8425	271570	0.0271	0.004	2.133e-11	Yes	Yes
ALPK3	15	85372645	15:85372645:A:T	rs6496452	A	T	0.557	266147	0.0245	0.003	4.293e-16	Yes	Yes
LINC00924-NR2F2	15	96460899	15:96460899:C:T	rs62008078	C	T	0.4478	264168	0.0216	0.0031	1.481e-12	Yes	Yes
SPSB3	16	1828030	16:1828030:A:G	rs35816944	G	A	0.9917	234277	0.1283	0.0205	3.547e-10	Yes	Yes
SRL	16	4323967	16:4323967:C:T	rs3747570	T	C	0.7569	263736	0.0214	0.0035	1.509e-09	Yes	Yes
CNOT1	16	58584772	16:58584772:G:T	rs7199856	G	T	0.2595	270736	0.024	0.0034	1.187e-12	Yes	Yes
CFDP1	16	75422201	16:75422201:A:C	rs8048816	C	A	0.2087	271570	0.0205	0.0037	2.011e-08	No	No
LINC01082-IRF8	16	86122622	16:86122622:A:G	rs13336935	A	G	0.2109	263062	0.0236	0.0039	1.704e-09	Yes	Yes
ZFPM1	16	88508781	16:88508781:C:G	rs8045886	C	G	0.7317	250320	0.0248	0.0036	7.867e-12	Yes	Yes
MINK1	17	4801163	17:4801163:A:C	rs7774	A	C	0.3265	271570	0.0204	0.0032	3.521e-10	Yes	Yes
EFCAB5	17	28531258	17:28531258:C:T	rs3794809	C	T	0.5584	271570	0.0198	0.003	3.953e-11	Yes	Yes
CACNA1G	17	48666064	17:48666064:C:T	rs757416	T	C	0.6445	271570	0.0332	0.0031	8.133e-27	Yes	Yes
CSHL1	17	61993137	17:61993137:A:G	rs3020619	G	A	0.2706	271570	0.0197	0.0034	5.351e-09	Yes	Yes
CASKIN2	17	73505172	17:73505172:A:G	rs7501873	G	A	0.2221	271570	0.0205	0.0037	2.941e-08	No	Yes
CDH2	18	26377724	18:26377724:A:G	rs1159973	A	G	0.4487	271570	0.0163	0.003	4.653e-08	Yes	No
GAREM	18	30013818	18:30013818:C:T	rs60928334	T	C	0.1515	271570	0.0312	0.0041	4.706e-14	Yes	Yes
DTNA	18	32396582	18:32396582:A:T	rs1790523	A	T	0.7323	271570	0.0219	0.0033	5.319e-11	Yes	Yes
CCBE1	18	57138957	18:57138957:C:T	rs12961264	C	T	0.2276	271570	0.0227	0.0035	1.212e-10	Yes	Yes
STK11	19	1217560	19:1217560:C:G	rs3795063	C	G	0.6444	251144	0.0239	0.0035	5.104e-12	Yes	Yes
TMEM59L	19	18733355	19:18733355:G:T	rs111551996	G	T	0.9493	270065	0.0426	0.0071	2.22e-09	Yes	Yes
RNF24-SMOX	20	4031439	20:4031439:G:T	rs6052269	G	T	0.4996	271570	0.024	0.003	1.628e-15	Yes	Yes
KIAA1755	20	36841914	20:36841914:A:G	rs3746471	G	A	0.5354	271570	0.0221	0.003	1.188e-13	Yes	Yes
DERL3	22	24152671	22:24152671:C:T	rs12172023	T	C	0.1215	266672	0.0365	0.0046	2.134e-15	Yes	Yes
SMTN	22	31499518	22:31499518:A:G	rs9621187	A	G	0.578	268485	0.0169	0.003	2.505e-08	No	No
PHF5A	22	41854446	22:41854446:C:T	rs9607805	T	C	0.7302	266147	0.0195	0.0034	1.062e-08	Yes	Yes
