# Supplementary material for: Multi-ancestry GWAS of the electrocardiographic PR interval identifies 202 loci underlying cardiac conduction
Source: Nat Commun. 2020 May 21;11:2542. doi: 10.1038/s41467-020-15706-x (PMC7242331; doi:10.1038/s41467-020-15706-x)
Supplement: Supplementary file 14 — Supplementary Data 11 [file 41467_2020_15706_MOESM14_ESM.xlsx]

## Sheet: SD11 GCTA results
Supplementary Data 11 Conditional analysis results for independent variants at previously not reported (a) and previously reported (b) PR interval associated loci.
All conditionally independent variants were present in at least 60% of the maximun sample size in the European meta-analysis and genome-wide significant (P_Joint < 5 × 10-8) in conditional analysis. Locus ID, unique locus identifier; Nearest gene(s): nearest annotated gene(s) to the lead variant. Type, 'lead' for the most significant variant in the European meta-analysis in the locus; 'conditiona…
a The lead variants identified in the European meta-analysis for these loci were not the same with the lead variants identified in the multi-ancestry meta-analysis, but they were in high linkage disequilibrium (LD, r2>0.9 for all apart from rs13072073 for which r2=0.68).
b This variant was the lead variant in the multi-ancestry meta-analysis for this locus.
c This variant was in high LD (r2=0.98) with the lead variant in the multi-ancestry meta-analysis.
* Missense variant or variant in high LD (r2> 0.8) with missense variant. Detailed annotations of all PR interval associated variants and their proxies (r2>0.8) are provided in Supplementary Data 12.
Variant information								European meta-analysis					Conditional analysis in UK Biobank
Locus ID	Nearest gene	Type	rsID	MarkerName	Chr	Position	EA	EAF	beta	SE	P	N	beta_Joint	SE_Joint	P_Joint
(a) Previously not reported loci from multi-ancestry meta-analysis
8	GJA5	lead	rs1692144	1:147281349:C:T	1	147281349	C	0.791	0.6416	0.0816	3.677e-15	271570	-	-	-
		conditional	rs112057010*	1:146598683:A:G	1	146598683	A	0.2542	0.4949	0.0878	1.748e-08	211027	0.510097	0.087817	6.29834e-09
10	PRRX1	lead	rs61824887a	1:170615724:A:T	1	170615724	A	0.8711	0.7402	0.1003	1.583e-13	271570	-	-	-
		conditional	rs61817383	1:170665348:C:T	1	170665348	C	0.7259	0.5016	0.0744	1.592e-11	271570	0.426447	0.0753245	1.50088e-08
49	SUB1	lead	rs922000a	5:32616255:C:T	5	32616255	T	0.3126	0.4784	0.0714	2.115e-11	271569	-	-	-
		conditional	rs1173743	5:32775047:G:T	5	32775047	T	0.5337	0.3987	0.0665	2.033e-09	270736	0.394227	0.0665075	3.07455e-09
58	DSP	lead	rs112019128a	6:7518915:C:T	6	7518915	T	0.0932	0.9414	0.118	1.475e-15	271570	-	-	-
		conditional	rs75945653*	6:7553063:G:T	6	7553063	G	0.0419	0.9864	0.1826	6.597e-08	271277	1.06572	0.1829	5.65104e-09
91	ZMIZ1	lead	rs1769758	10:80898969:G:T	10	80898969	T	0.4967	0.5088	0.0769	3.764e-11	245983	-	-	-
		conditional	rs10824756	10:81178171:C:T	10	81178171	T	0.5538	0.4218	0.0678	4.8e-10	271570	0.433476	0.0678174	1.63921e-10
103	SRGAP1	lead	rs4346062a	12:64284283:A:G	12	64284283	G	0.0559	0.9548	0.1462	6.588e-11	270354	-	-	-
		conditional	rs10784418	12:65042887:C:T	12	65042887	T	0.362	0.3903	0.0687	1.313e-08	271570	0.394726	0.0687101	9.20256e-09
142	CCBE1	lead	rs12961264	18:57138957:C:T	18	57138957	C	0.2269	0.5413	0.079	7.216e-12	271570	-	-	-
		conditional	rs73961284	18:57304779:A:G	18	57304779	G	0.8614	0.587	0.1036	1.438e-08	271570	0.575598	0.10362	2.77808e-08
69	DGKB	lead	rs56352403	7:14453835:A:G	7	14453835	G	0.6409	0.5747	0.0701	2.452e-16	270142	-	-	-
		conditional	rs55734480	7:14372009:A:G	7	14372009	G	0.7484	0.5256	0.0779	1.484e-11	271570	0.552206	0.0779741	1.42167e-12
57	LINC01411	lead	rs4868384	5:173779209:A:T	5	173779209	T	0.4635	0.4594	0.0666	5.19e-12	271250	-	-	-
		conditional	rs10035459	5:173764371:A:G	5	173764371	A	0.1985	0.6079	0.0902	1.605e-11	271250	0.575475	0.0917164	3.5075e-10
		conditional	rs185232000	5:173800675:C:T	5	173800675	T	0.0139	2.4496	0.4181	4.66e-09	194005	2.42006	0.41883	7.55275e-09
		conditional	rs7447819	5:174150696:A:C	5	174150696	C	0.705	0.4225	0.0746	1.458e-08	270035	0.442952	0.074698	3.03118e-09
75	DLC1	lead	rs1188285	8:13130478:C:T	8	13130478	C	0.5583	0.4593	0.0667	5.615e-12	271570	-	-	-
		conditional	rs118045325	8:13145524:A:T	8	13145524	T	0.0588	0.9842	0.1531	1.3e-10	269772	1.05647	0.153442	5.77148e-12
		conditional	rs17222010	8:13369061:A:G	8	13369061	G	0.1445	0.6308	0.0977	1.096e-10	268485	0.67146	0.0979184	7.01526e-12
48	SLC12A7	lead	rs182271072	5:1066400:A:G	5	1066400	A	0.9853	3.0046	0.336	3.858e-19	245787	-	-	-
		conditional	rs4975572b	5:1054197:C:T	5	1054197	T	0.4739	0.6039	0.0683	9.728e-19	271570	0.473328	0.0699183	1.29028e-11
		conditional	rs4639275	5:1109592:C:G	5	1109592	G	0.6862	0.5374	0.076	1.55e-12	256958	0.474257	0.0776642	1.01834e-09
130	LINC01082/ IRF8	lead	rs13336880	16:86122524:A:G	16	86122524	A	0.2252	0.4883	0.0852	9.944e-09	263062	-	-	-
		conditional	rs75459991c	16:86185072:A:G	16	86185072	A	0.0734	0.7348	0.1308	1.926e-08	266147	0.751291	0.130815	9.29246e-09
(b) Previously reported loci
5	KCND3	lead	rs116532272	1:112560237:A:G	1	112560237	G	0.9781	3.7654	0.2559	5.36e-49	258457	-	-	-
		conditional	rs776293589	1:112462949:D:I	1	112462949	TCC	0.741	1.098	0.088	9.736e-36	204626	0.99867	0.0883313	1.22601e-29
8	ID2	lead	rs6730558	2:8756183:C:T	2	8756183	T	0.3781	1.1179	0.0687	1.376e-59	271570	-	-	-
		conditional	rs11689876	2:8703504:C:T	2	8703504	T	0.1971	0.8411	0.0854	7.196e-23	271570	0.767637	0.0863181	5.94226e-19
		conditional	rs80025787	2:8788633:A:G	2	8788633	A	0.9296	0.3596	0.139	0.009697	269591	0.830934	0.141253	4.03876e-09
10	MEIS1	lead	rs4430933a	2:66749610:A:G	2	66749610	A	0.3895	1.3395	0.0678	5.598e-87	271570	-	-	-
		conditional	rs115610217	2:66794095:C:T	2	66794095	C	0.9238	1.0194	0.1755	6.316e-09	261205	1.14541	0.175749	7.1583e-11
		conditional	rs11896827	2:67042071:C:T	2	67042071	C	0.2389	0.4397	0.0774	1.344e-08	271570	0.509834	0.0775401	4.86214e-11
11	TMEM182	lead	rs2540286a	2:103396430:C:G	2	103396430	C	0.4903	0.7853	0.0662	1.911e-32	271570	-	-	-
		conditional	rs2540277	2:103426177:C:T	2	103426177	C	0.9328	1.2735	0.1354	5.071e-21	271570	1.8255	0.140454	1.27065e-38
12	FIGN	lead	rs13032472a	2:164347373:A:G	2	164347373	G	0.642	0.6511	0.069	3.758e-21	271570	-	-	-
		conditional	rs970953	2:164514239:C:T	2	164514239	C	0.731	0.6396	0.0761	4.455e-17	271570	0.603954	0.0762123	2.28838e-15
13	TTN/CCDC141	lead	rs2042995*	2:179558366:C:T	2	179558366	C	0.2244	0.8345	0.0797	1.214e-25	270065	-	-	-
		conditional	rs7564036	2:179704973:A:G	2	179704973	G	0.9595	0.9646	0.1732	2.56e-08	271570	1.80039	0.184103	1.38223e-22
		conditional	rs17362588*	2:179721046:A:G	2	179721046	G	0.9047	1.0349	0.1141	1.166e-19	271570	0.900039	0.115232	5.6874e-15
15	SCN5A/SCN10A	lead	rs6801957	3:38767315:C:T	3	38767315	T	0.4038	3.4576	0.0672	3.42e-578	270736	-	-	-
		conditional	rs143756608	3:37481631:D:I	3	37481631	T	0.047	1.0724	0.2026	1.195e-07	202321	1.20331	0.202863	2.99927e-09
		conditional	rs11707849	3:37671815:C:T	3	37671815	T	0.0114	0.7663	0.4379	0.0801	228213	4.23254	0.570201	1.14593e-13
		conditional	rs2364658	3:37789382:C:G	3	37789382	G	0.4158	0.3686	0.067	3.743e-08	271570	0.427633	0.0676944	2.66487e-10
		conditional	rs192231913	3:37987685:C:T	3	37987685	C	0.9924	2.7929	0.5155	6.021e-08	214192	6.82848	0.672693	3.28105e-24
		conditional	rs186985210	3:38430346:C:T	3	38430346	T	0.0041	4.088	0.7782	1.497e-07	214906	4.30241	0.779409	3.38826e-08
		conditional	rs181122952	3:38447548:A:G	3	38447548	A	0.0133	3.7534	0.3362	6.073e-29	248000	2.21691	0.3433	1.06331e-10
		conditional	rs185734658	3:38460858:A:G	3	38460858	A	0.9798	2.4324	0.3643	2.431e-11	171165	2.28454	0.364786	3.78378e-10
		conditional	rs150713732	3:38484841:A:C	3	38484841	A	0.0318	2.2564	0.2272	3.016e-23	270631	1.54	0.22905	1.77502e-11
		conditional	rs148458221	3:38496634:A:G	3	38496634	G	0.0105	4.8039	0.4577	8.958e-26	179202	3.79905	0.459133	1.29106e-16
		conditional	rs503327	3:38524363:C:T	3	38524363	T	0.0948	0.7443	0.1201	5.762e-10	271570	0.75798	0.12491	1.29358e-09
		conditional	rs12497866	3:38575865:C:T	3	38575865	T	0.241	1.553	0.0774	1.79e-89	270142	0.834152	0.0881813	3.09366e-21
		conditional	rs58454174	3:38615533:C:T	3	38615533	C	0.8103	2.1796	0.0852	2.21e-144	270142	0.721498	0.109129	3.80685e-11
		conditional	rs41312411	3:38621237:C:G	3	38621237	G	0.1456	2.649	0.0948	7.31e-172	270142	2.26341	0.10833	6.11759e-97
		conditional	rs71323670	3:38625154:C:T	3	38625154	C	0.1112	1.6771	0.1069	1.996e-55	270736	2.45344	0.116501	1.87562e-98
		conditional	rs7430191	3:38654024:C:T	3	38654024	C	0.7914	1.7865	0.0831	1.43e-102	268485	1.11939	0.109004	9.6927e-25
		conditional	rs7647031	3:38668192:A:G	3	38668192	G	0.772	1.4211	0.0832	2.183e-65	265771	0.894735	0.092553	4.15323e-22
		conditional	rs41314746	3:38675715:C:T	3	38675715	C	0.9839	3.1074	0.3434	1.46e-19	243225	2.26819	0.350006	9.14497e-11
		conditional	rs7427574	3:38684835:C:G	3	38684835	G	0.182	1.7951	0.0868	5.13e-95	270820	2.42511	0.0954827	2.62568e-142
		conditional	rs7373492	3:38687369:C:T	3	38687369	C	0.9792	6.2757	0.2485	9.65e-141	263789	4.00938	0.260473	1.83275e-53
		conditional	rs79271809	3:38712306:C:T	3	38712306	C	0.0924	0.2075	0.1148	0.0707	270142	1.12125	0.127917	1.8602e-18
		conditional	rs74941275	3:38722405:A:C	3	38722405	A	0.1887	0.6308	0.085	1.124e-13	270736	0.598207	0.0943844	2.32788e-10
		conditional	rs75559840	3:38742389:A:G	3	38742389	A	0.1001	2.3828	0.1273	3.849e-78	271570	1.01955	0.140488	3.95327e-13
		conditional	rs9637536	3:38800873:A:G	3	38800873	A	0.1514	0.7896	0.0925	1.342e-17	270736	1.16471	0.116953	2.30801e-23
20	PDZRN3	lead	rs13072073a	3:73545751:C:T	3	73545751	C	0.6203	0.7861	0.0685	1.672e-30	271570	-	-	-
		conditional	rs6801287	3:73637638:C:T	3	73637638	T	0.3823	0.4293	0.0677	2.337e-10	271570	0.455772	0.0680875	2.17281e-11
		conditional	rs4603898	3:73721093:A:G	3	73721093	G	0.0544	0.9945	0.1463	1.061e-11	271570	0.889714	0.14717	1.48951e-09
		conditional	rs586936	3:73862616:A:G	3	73862616	A	0.4087	0.3122	0.0682	4.701e-06	271570	0.383278	0.0688307	2.57068e-08
21	PHLDB2	lead	rs2137897	3:111643561:C:T	3	111643561	T	0.2186	0.6745	0.08	3.315e-17	271570	-	-	-
		conditional	rs10511302	3:111687756:C:T	3	111687756	T	0.5877	0.5367	0.0671	1.247e-15	271569	0.414428	0.0696802	2.72138e-09
24	PPARGC1A	lead	rs2970854	4:23826958:G:T	4	23826958	G	0.2593	0.5829	0.0754	1.114e-14	271570	-	-	-
		conditional	rs11734408	4:23882519:A:G	4	23882519	A	0.7026	0.2947	0.0734	5.947e-05	271570	0.460308	0.0756837	1.18693e-09
29	FAT1	lead	rs73015656a	4:187627011:C:T	4	187627011	T	0.1311	0.7307	0.0983	1.046e-13	270355	-	-	-
		conditional	rs2584345	4:187527818:C:T	4	187527818	T	0.575	0.4955	0.0672	1.661e-13	270355	0.454829	0.0674714	1.57234e-11
32	NKX2-5/ATP6V0E1/C5orf41/BNIP1/CREBRF	lead	rs29795	5:172577403:A:G	5	172577403	A	0.5822	1.0263	0.0669	4.546e-53	271250	-	-	-
		conditional	rs393562	5:172494876:A:G	5	172494876	G	0.9563	1.8343	0.1951	5.334e-21	260601	1.17088	0.200472	5.20139e-09
		conditional	rs954635	5:172647847:A:T	5	172647847	A	0.7039	0.8802	0.0747	5.09e-32	269239	0.495221	0.0797082	5.20084e-10
34	SLC35F1	lead	rs11153730	6:118667522:C:T	6	118667522	T	0.4956	1.0179	0.0665	5.75e-53	270142	-	-	-
		conditional	rs794856	6:119011982:G:T	6	119011982	T	0.9612	0.448	0.1792	0.01241	270065	1.03266	0.182383	1.49597e-08
35	GJA1	lead	rs763076	6:122148562:A:G	6	122148562	G	0.1043	0.898	0.1087	1.448e-16	271570
		conditional	rs7759673	6:121771621:A:T	6	121771621	T	0.5579	0.4562	0.0675	1.426e-11	271570	0.383717	0.0677171	1.45762e-08
		conditional	rs4541776	6:121902869:A:G	6	121902869	A	0.6423	0.538	0.0754	9.536e-13	266506	0.467835	0.0757025	6.41349e-10
		conditional	rs35299721	6:123738460:D:I	6	123738460	TA	0.0961	0.7541	0.133	1.426e-08	203411	0.752751	0.133014	1.52093e-08
36	TBX20/HERPUD2	lead	rs340392a	7:35408448:A:G	7	35408448	A	0.3763	0.6496	0.068	1.188e-21	271570	-	-	-
		conditional	rs145598820	7:35359518:A:G	7	35359518	A	0.0309	1.8659	0.2169	7.83e-18	271570	1.9486	0.218918	5.53297e-19
		conditional	rs235397	7:35372749:C:T	7	35372749	T	0.7489	0.6333	0.0778	4.051e-16	271570	0.526626	0.0793105	3.13549e-11
		conditional	rs1425140	7:35417806:A:G	7	35417806	A	0.0539	1.3311	0.1518	1.825e-18	271570	1.12051	0.158057	1.34787e-12
37	CAV1/CAV2	lead	rs1997571a	7:116198621:A:G	7	116198621	G	0.4076	1.9131	0.0672	2.06e-178	271570	-	-	-
		conditional	rs36199027	7:116050535:C:T	7	116050535	C	0.0923	1.7342	0.1197	1.372e-47	271570	0.885949	0.12558	1.72789e-12
40	ZFPM2	lead	rs72671655	8:106347897:A:T	8	106347897	T	0.9599	1.6968	0.1854	5.496e-20	271570	-	-	-
		conditional	rs2342797	8:106324274:C:T	8	106324274	T	0.8183	0.6569	0.0864	2.967e-14	271570	0.646744	0.0874565	1.41369e-13
		conditional	rs7003261	8:106519305:C:T	8	106519305	C	0.2529	0.681	0.0761	3.727e-19	271570	0.570447	0.076872	1.16468e-13
41	KLHL38	lead	rs4871397	8:124635197:C:G	8	124635197	G	0.065	1.139	0.14	4.064e-16	270355	-	-	-
		conditional	rs17337621	8:124542519:C:G	8	124542519	C	0.0623	0.823	0.1401	4.273e-09	270589	0.900856	0.140347	1.37371e-10
44	SYNPO2L	lead	rs60632610a	10:75415677:C:T	10	75415677	C	0.8534	0.8484	0.0938	1.534e-19	271570	-	-	-
		conditional	rs2395137*	10:76847993:C:G	10	76847993	G	0.5918	0.5089	0.0672	3.706e-14	271570	0.484943	0.067256	5.5783e-13
		conditional	rs1359037	10:77690754:C:T	10	77690754	C	0.8006	0.5407	0.0844	1.507e-10	271570	0.540483	0.0844407	1.5462e-10
45	ALDH18A1/SORBS1	lead	rs8758a	10:97366107:A:G	10	97366107	G	0.379	0.7946	0.0683	2.774e-31	271570	-	-	-
		conditional	rs10786206	10:97178285:C:G	10	97178285	C	0.4227	0.5487	0.0673	3.657e-16	271570	0.493542	0.0675263	2.69383e-13
46	SH3PXD2A/OBFC1	lead	rs10883908	10:105524081:C:T	10	105524081	T	0.4031	1.0043	0.0674	3.306e-50	271570	-	-	-
		conditional	rs1044258	10:103605714:C:T	10	103605714	T	0.6535	0.5926	0.0696	1.675e-17	271568	0.625247	0.0697024	2.95881e-19
		conditional	rs57496702	10:105586041:C:T	10	105586041	C	0.9582	0.6218	0.1687	0.0002272	271570	1.52319	0.202415	5.26774e-14
		conditional	rs11191818	10:105591779:G:T	10	105591779	G	0.5187	0.4807	0.0778	6.399e-10	206129	0.909216	0.0914723	2.79403e-23
		conditional	rs762032	10:105614754:G:T	10	105614754	G	0.055	1.2847	0.1507	1.537e-17	270065	0.999219	0.153707	7.98941e-11
		conditional	rs10748858	10:105639514:G:T	10	105639514	T	0.5903	0.75	0.068	2.889e-28	271569	0.541081	0.0712267	3.04007e-14
		conditional	rs188491623	10:105871872:A:G	10	105871872	G	0.0116	3.3652	0.531	2.329e-10	181097	2.96863	0.532676	2.5031e-08
51	TBX5-TBX3, MED13L	lead	rs1124477	12:115349497:C:T	12	115349497	T	0.3058	1.2612	0.0722	2.529e-68	271570	-	-	-
		conditional	rs883079	12:114793240:C:T	12	114793240	C	0.2841	1.118	0.0733	1.792e-52	271570	1.08294	0.0733987	2.88919e-49
		conditional	rs11067104	12:114854089:C:G	12	114854089	G	0.8871	0.8706	0.1069	3.838e-16	271570	0.845899	0.106987	2.64605e-15
		conditional	rs1061651	12:115108361:C:T	12	115108361	T	0.7369	1.1869	0.0778	1.641e-52	270260	1.06207	0.07855	1.17705e-41
		conditional	rs6489973	12:115156523:A:G	12	115156523	A	0.572	1.0183	0.0667	1.259e-52	271570	0.804757	0.0674823	8.72086e-33
		conditional	rs5029664	12:115350053:A:C	12	115350053	C	0.7005	0.7353	0.0805	6.365e-20	265838	0.524304	0.0813272	1.14204e-10
		conditional	rs35479	12:115529349:C:T	12	115529349	C	0.1861	0.5411	0.0849	1.875e-10	271570	0.548242	0.0849622	1.09825e-10
		conditional	rs140828160	12:116229226:D:I	12	116229226	G	0.9175	1.3801	0.1408	1.097e-22	204626	1.16332	0.142681	3.54154e-16
		conditional	rs1974741	12:116234273:C:T	12	116234273	T	0.0863	0.9782	0.1185	1.511e-16	271570	0.957214	0.11954	1.17111e-15
		conditional	rs2384681	12:116283943:C:T	12	116283943	T	0.2625	0.4952	0.0751	4.384e-11	271570	0.443636	0.0761402	5.65788e-09
52	XPO4/EFHA1	lead	rs12869776	13:22103294:A:G	13	22103294	A	0.5902	0.9789	0.0672	5.351e-48	271570	-	-	-
		conditional	rs3936081	13:21348279:A:G	13	21348279	G	0.0935	1.121	0.1386	5.917e-16	206129	1.17625	0.138727	2.27374e-17
		conditional	rs2013546	13:21386229:A:G	13	21386229	A	0.1638	1.0363	0.0898	8.83e-31	271570	1.24984	0.0945448	6.76522e-40
		conditional	rs11147883	13:21444538:A:T	13	21444538	A	0.3338	0.1537	0.0701	0.0284	271570	0.469533	0.0738083	1.99764e-10
56	IL25/MYH6	lead	rs2754171	14:23904988:C:T	14	23904988	C	0.9755	4.2702	0.2756	3.751e-54	247947	-	-	-
		conditional	rs28711516*	14:23876267:C:T	14	23876267	C	0.9201	0.5834	0.1247	2.906e-06	271570	1.02653	0.131292	5.33739e-15
		conditional	rs11621360	14:23911407:C:T	14	23911407	T	0.3349	0.6072	0.0717	2.471e-17	271570	0.722026	0.0756179	1.31782e-21
61	LINC00670/MYOCD	lead	rs35712872	17:12635871:A:G	17	12635871	G	0.2508	1.2133	0.0793	7.89e-53	271570	-	-	-
		conditional	rs11653182	17:12495199:A:G	17	12495199	A	0.4352	0.582	0.0676	7.185e-18	271570	0.611206	0.0676329	1.60867e-19
