# Supplementary material for: Multi-ancestry GWAS of the electrocardiographic PR interval identifies 202 loci underlying cardiac conduction
Source: Nat Commun. 2020 May 21;11:2542. doi: 10.1038/s41467-020-15706-x (PMC7242331; doi:10.1038/s41467-020-15706-x)
Supplement: Supplementary file 15 — Supplementary Data 12 [file 41467_2020_15706_MOESM15_ESM.xlsx]

## Sheet: SD12 VEP annotations
Supplementary Data 12 Annotation of lead and conditionally independent variants and their proxies (r2>0.8) at all PR interval associated loci using Variant Effect Predictor.
For each variant only the most severe consequence is presented.
Position, base pair position in build 37; R2, r-squared between the lead or conditionally independent variant and the proxy variant.
* These loci reached genome-wide significance in the European ancestry meta-analysis and were borderline genome-wide significant in the multi-ancestry meta-analysis (P<5.4×10-7).
			Lead or conditionally independent variant					Proxy variant							VEP annotations for variants in column I
Locus ID	Locus Type	Nearest gene to the lead variant in the locus or reported gene (for previously reported loci)	Markername	Chromosome	Position	Allele1	Allele2	Markername	rsID	Chromosome	Position	Allele1	Allele2	R2	Consequence	IMPACT	SYMBOL	Gene	BIOTYPE	EXON	INTRON	cDNA_position	CDS_position	Protein_position	Amino_acids	Codons	Existing_variation	DISTANCE	STRAND	SOURCE	SIFT	PolyPhen	Condel	ada_score	rf_score	AF	AFR_AF	AMR_AF	EAS_AF	EUR_AF	SAS_AF	CLIN_SIG	SOMATIC	PHENO	PUBMED
1	previously not reported	HSPG2	1:22282619:C:T	1	22282619	T	C	1:22278426:C:T	rs10917069	1	22278426	C	T	0.872852	intergenic_variant	MODIFIER	-	-	-	-	-	-	-	-	-	-	rs10917069	-	-	-	-	-	-	-	-	0.7726	0.5893	0.8386	0.7609	0.8738	0.8814	-	-	-	-
1	previously not reported	HSPG2	1:22282619:C:T	1	22282619	T	C	1:22278790:A:G	rs10917070	1	22278790	G	A	0.873752	intergenic_variant	MODIFIER	-	-	-	-	-	-	-	-	-	-	rs10917070	-	-	-	-	-	-	-	-	0.7724	0.5893	0.8386	0.7609	0.8738	0.8804	-	-	-	-
1	previously not reported	HSPG2	1:22282619:C:T	1	22282619	T	C	1:22279191:A:G	rs7354857	1	22279191	A	G	0.873752	intergenic_variant	MODIFIER	-	-	-	-	-	-	-	-	-	-	rs7354857	-	-	-	-	-	-	-	-	0.7724	0.5893	0.8386	0.7609	0.8738	0.8804	-	-	-	-
1	previously not reported	HSPG2	1:22282619:C:T	1	22282619	T	C	1:22279280:A:C	rs7355161	1	22279280	C	A	0.872715	intergenic_variant	MODIFIER	-	-	-	-	-	-	-	-	-	-	rs7355161	-	-	-	-	-	-	-	-	0.7722	0.5885	0.8386	0.7609	0.8738	0.8804	-	-	-	-
1	previously not reported	HSPG2	1:22282619:C:T	1	22282619	T	C	1:22280382:C:T	rs6426729	1	22280382	T	C	0.873752	intergenic_variant	MODIFIER	-	-	-	-	-	-	-	-	-	-	rs6426729	-	-	-	-	-	-	-	-	0.7724	0.5893	0.8386	0.7609	0.8738	0.8804	-	-	-	-
1	previously not reported	HSPG2	1:22282619:C:T	1	22282619	T	C	1:22281393:A:G	rs7533718	1	22281393	G	A	0.863299	intergenic_variant	MODIFIER	-	-	-	-	-	-	-	-	-	-	rs7533718	-	-	-	-	-	-	-	-	0.77	0.5893	0.8401	0.75	0.8738	0.8783	-	-	-	-
1	previously not reported	HSPG2	1:22282619:C:T	1	22282619	T	C	1:22281479:A:G	rs10917071	1	22281479	G	A	0.873891	intergenic_variant	MODIFIER	-	-	-	-	-	-	-	-	-	-	rs10917071	-	-	-	-	-	-	-	-	0.7728	0.5908	0.8401	0.7599	0.8738	0.8804	-	-	-	-
1	previously not reported	HSPG2	1:22282619:C:T	1	22282619	T	C	1:22281664:A:G	rs10917072	1	22281664	G	A	0.873891	intergenic_variant	MODIFIER	-	-	-	-	-	-	-	-	-	-	rs10917072	-	-	-	-	-	-	-	-	0.7728	0.59	0.8401	0.7599	0.8748	0.8804	-	-	-	-
1	previously not reported	HSPG2	1:22282619:C:T	1	22282619	T	C	1:22281690:A:G	rs10917073	1	22281690	A	G	0.871305	intergenic_variant	MODIFIER	-	-	-	-	-	-	-	-	-	-	rs10917073	-	-	-	-	-	-	-	-	0.7734	0.5923	0.8401	0.7599	0.8748	0.8804	-	-	-	-
1	previously not reported	HSPG2	1:22282619:C:T	1	22282619	T	C	1:22281718:A:T	rs12140171	1	22281718	T	A	0.873891	intergenic_variant	MODIFIER	-	-	-	-	-	-	-	-	-	-	rs12140171	-	-	-	-	-	-	-	-	0.7728	0.59	0.8401	0.7599	0.8748	0.8804	-	-	-	-
1	previously not reported	HSPG2	1:22282619:C:T	1	22282619	T	C	1:22281759:A:G	rs10917074	1	22281759	G	A	0.874582	intergenic_variant	MODIFIER	-	-	-	-	-	-	-	-	-	-	rs10917074	-	-	-	-	-	-	-	-	0.7722	0.5893	0.8401	0.7589	0.8738	0.8804	-	-	-	-
1	previously not reported	HSPG2	1:22282619:C:T	1	22282619	T	C	1:22282117:A:C	rs4406609	1	22282117	C	A	0.888103	regulatory_region_variant	MODIFIER	-	-	promoter_flanking_region	-	-	-	-	-	-	-	rs4406609	-	-	-	-	-	-	-	-	0.77	0.5802	0.8401	0.7599	0.8738	0.8804	-	-	-	-
1	previously not reported	HSPG2	1:22282619:C:T	1	22282619	T	C	1:22282619:C:T	rs7529220	1	22282619	T	C	1	regulatory_region_variant	MODIFIER	-	-	promoter_flanking_region	-	-	-	-	-	-	-	rs7529220	-	-	-	-	-	-	-	-	0.7492	0.5219	0.8242	0.7599	0.8608	0.8773	-	-	-	-
1	previously not reported	HSPG2	1:22282619:C:T	1	22282619	T	C	1:22283583:A:G	rs6675669	1	22283583	A	G	0.935455	regulatory_region_variant	MODIFIER	-	-	promoter_flanking_region	-	-	-	-	-	-	-	rs6675669	-	-	-	-	-	-	-	-	0.7496	0.5174	0.8314	0.7411	0.8728	0.8875	-	-	-	-
2	previously not reported	AIM1L	1:26679041:C:T	1	26679041	T	C	1:26679041:C:T	rs12031946	1	26679041	T	C	1	intron_variant	MODIFIER	AIM1L	55057	protein_coding	-	1/19	-	-	-	-	-	rs12031946	-	-1	RefSeq	-	-	-	-	-	0.2734	0.0719	0.3271	0.5645	0.1014	0.3845	-	-	-	-
3	previously not reported	MAP7D1	1:36620801:C:G	1	36620801	G	C	1:36620801:C:G	rs1475267	1	36620801	G	C	1	upstream_gene_variant	MODIFIER	MAP7D1	ENSG00000116871	protein_coding	-	-	-	-	-	-	-	rs1475267	1002	1	Ensembl	-	-	-	-	-	-	-	-	-	-	-	-	-	-	-
3	previously not reported	MAP7D1	1:36620801:C:G	1	36620801	G	C	1:36622730:C:T	rs272834	1	36622730	T	C	0.96646	intron_variant	MODIFIER	MAP7D1	ENSG00000116871	protein_coding	-	1/16	-	-	-	-	-	rs272834	-	1	Ensembl	-	-	-	-	-	0.8606	0.9576	0.9006	0.9325	0.8221	0.6667	-	-	-	-
3	previously not reported	MAP7D1	1:36620801:C:G	1	36620801	G	C	1:36636095:D:I	rs11368766	1	36636095	D	I	0.893223	intron_variant	MODIFIER	MAP7D1	ENSG00000116871	protein_coding	-	1/16	-	-	-	-	-	rs11368766	-	1	Ensembl	-	-	-	-	-	0.8706	0.9841	0.9107	0.9345	0.828	0.6667	-	-	-	-
4	previously not reported	EDN2	1:41955714:A:G	1	41955714	G	A	1:41955714:A:G	rs12751675	1	41955714	G	A	1	intergenic_variant	MODIFIER	-	-	-	-	-	-	-	-	-	-	rs12751675	-	-	-	-	-	-	-	-	0.1262	0.0303	0.1527	0.1319	0.2326	0.1217	-	-	-	-
5	previously not reported	SSBP3	1:54741767:C:T	1	54741767	C	T	1:54737590:A:G	rs487645	1	54737590	A	G	0.975665	intron_variant	MODIFIER	SSBP3	ENSG00000157216	protein_coding	-	5/17	-	-	-	-	-	rs487645	-	-1	Ensembl	-	-	-	-	-	0.6797	0.7428	0.7205	0.6696	0.5239	0.7362	-	-	-	-
5	previously not reported	SSBP3	1:54741767:C:T	1	54741767	C	T	1:54741767:C:T	rs603901	1	54741767	C	T	1	intron_variant	MODIFIER	SSBP3	ENSG00000157216	protein_coding	-	5/17	-	-	-	-	-	rs603901	-	-1	Ensembl	-	-	-	-	-	0.6807	0.7458	0.7248	0.6696	0.5229	0.7352	-	-	-	-
5	previously not reported	SSBP3	1:54741767:C:T	1	54741767	C	T	1:54742078:A:G	rs536684	1	54742078	A	G	0.995477	intron_variant	MODIFIER	SSBP3	ENSG00000157216	protein_coding	-	5/17	-	-	-	-	-	rs536684	-	-1	Ensembl	-	-	-	-	-	0.6809	0.7458	0.7248	0.6706	0.5229	0.7352	-	-	-	-
5	previously not reported	SSBP3	1:54741767:C:T	1	54741767	C	T	1:54742471:C:T	rs590041	1	54742471	T	C	0.987387	intron_variant	MODIFIER	SSBP3	ENSG00000157216	protein_coding	-	5/17	-	-	-	-	-	rs590041	-	-1	Ensembl	-	-	-	-	-	0.6827	0.7458	0.7248	0.6716	0.5249	0.7413	-	-	-	-
5	previously not reported	SSBP3	1:54741767:C:T	1	54741767	C	T	1:54742618:A:G	rs562408	1	54742618	A	G	0.880537	intron_variant	MODIFIER	SSBP3	ENSG00000157216	protein_coding	-	5/17	-	-	-	-	-	rs562408	-	-1	Ensembl	-	-	-	-	-	0.6597	0.6657	0.719	0.6706	0.5249	0.7372	-	-	-	-
6	previously not reported	NFIA	1:61895257:A:C	1	61895257	C	A	1:61886599:C:T	rs12142600	1	61886599	C	T	0.926278	intron_variant	MODIFIER	NFIA	ENSG00000162599	protein_coding	-	10/11	-	-	-	-	-	rs12142600	-	1	Ensembl	-	-	-	-	-	0.4243	0.2481	0.3718	0.4425	0.4881	0.6155	-	-	-	-
6	previously not reported	NFIA	1:61895257:A:C	1	61895257	C	A	1:61886744:C:T	rs4915740	1	61886744	C	T	0.887054	intron_variant	MODIFIER	NFIA	ENSG00000162599	protein_coding	-	10/11	-	-	-	-	-	rs4915740	-	1	Ensembl	-	-	-	-	-	0.4345	0.2852	0.3746	0.4435	0.4871	0.6155	-	-	-	-
6	previously not reported	NFIA	1:61895257:A:C	1	61895257	C	A	1:61888615:C:T	rs2024790	1	61888615	C	T	0.943351	intron_variant	MODIFIER	NFIA	ENSG00000162599	protein_coding	-	10/11	-	-	-	-	-	rs2024790	-	1	Ensembl	-	-	-	-	-	0.4203	0.2307	0.3703	0.4435	0.4901	0.6166	-	-	-	-
6	previously not reported	NFIA	1:61895257:A:C	1	61895257	C	A	1:61888914:D:I	rs547830034	1	61888914	D	I	0.880498	intron_variant	MODIFIER	NFIA	ENSG00000162599	protein_coding	-	10/11	-	-	-	-	-	rs547830034	-	1	Ensembl	-	-	-	-	-	0.4105	0.2375	0.3617	0.4365	0.4702	0.591	-	-	-	-
6	previously not reported	NFIA	1:61895257:A:C	1	61895257	C	A	1:61894653:C:T	rs2207793	1	61894653	C	T	0.966895	intron_variant	MODIFIER	NFIA	ENSG00000162599	protein_coding	-	11/11	-	-	-	-	-	rs2207793	-	1	Ensembl	-	-	-	-	-	0.4193	0.2254	0.3718	0.4444	0.4901	0.6166	-	-	-	-
6	previously not reported	NFIA	1:61895257:A:C	1	61895257	C	A	1:61894902:A:G	rs2207791	1	61894902	A	G	0.936148	intron_variant	MODIFIER	NFIA	ENSG00000162599	protein_coding	-	11/11	-	-	-	-	-	rs2207791	-	1	Ensembl	-	-	-	-	-	0.4277	0.2526	0.3775	0.4444	0.492	0.6166	-	-	1	-
6	previously not reported	NFIA	1:61895257:A:C	1	61895257	C	A	1:61895257:A:C	rs6587924	1	61895257	C	A	1	intron_variant	MODIFIER	NFIA	ENSG00000162599	protein_coding	-	11/11	-	-	-	-	-	rs6587924	-	1	Ensembl	-	-	-	-	-	0.4269	0.2269	0.379	0.4444	0.5179	0.6196	-	-	-	-
6	previously not reported	NFIA	1:61895257:A:C	1	61895257	C	A	1:61895589:A:C	rs6587925	1	61895589	C	A	0.839817	intron_variant	MODIFIER	NFIA	ENSG00000162599	protein_coding	-	11/11	-	-	-	-	-	rs6587925	-	1	Ensembl	-	-	-	-	-	0.4455	0.239	0.4135	0.4901	0.5229	0.6217	-	-	-	-
6	previously not reported	NFIA	1:61895257:A:C	1	61895257	C	A	1:61897148:A:T	rs4915741	1	61897148	T	A	0.82543	intron_variant	MODIFIER	NFIA	ENSG00000162599	protein_coding	-	11/11	-	-	-	-	-	rs4915741	-	1	Ensembl	-	-	-	-	-	0.4499	0.2542	0.4135	0.4901	0.5229	0.6237	-	-	-	-
6	previously not reported	NFIA	1:61895257:A:C	1	61895257	C	A	1:61897967:A:G	rs2207790	1	61897967	G	A	0.924737	intron_variant	MODIFIER	NFIA	ENSG00000162599	protein_coding	-	11/11	-	-	-	-	-	rs2207790	-	1	Ensembl	-	-	-	-	-	0.4073	0.1861	0.3674	0.4395	0.4901	0.6166	-	-	1	23463857
6	previously not reported	NFIA	1:61895257:A:C	1	61895257	C	A	1:61899519:A:G	rs11207739	1	61899519	A	G	0.925632	intron_variant	MODIFIER	NFIA	ENSG00000162599	protein_coding	-	11/11	-	-	-	-	-	rs11207739	-	1	Ensembl	-	-	-	-	-	0.4097	0.1884	0.3674	0.4464	0.4901	0.6186	-	-	-	-
6	previously not reported	NFIA	1:61895257:A:C	1	61895257	C	A	1:61903521:D:I	rs66839476	1	61903521	I	T	0.886776	intron_variant	MODIFIER	NFIA	ENSG00000162599	protein_coding	-	11/11	-	-	-	-	-	rs66839476	-	1	Ensembl	-	-	-	-	-	0.4201	0.2148	0.3818	0.4573	0.496	0.6084	-	-	-	-
6	previously not reported	NFIA	1:61895257:A:C	1	61895257	C	A	1:61909126:A:G	rs12741766	1	61909126	A	G	0.838329	intron_variant	MODIFIER	NFIA	ENSG00000162599	protein_coding	-	11/11	-	-	-	-	-	rs12741766	-	1	Ensembl	-	-	-	-	-	0.4259	0.23	0.3833	0.4593	0.506	0.6043	-	-	-	-
7	previously not reported	CDC7	1:91966445:A:G	1	91966445	A	G	1:91964946:C:T	rs12717798	1	91964946	T	C	0.946905	upstream_gene_variant	MODIFIER	CDC7	ENSG00000097046	protein_coding	-	-	-	-	-	-	-	rs12717798	1719	1	Ensembl	-	-	-	-	-	0.1639	0.031	0.2046	0.0476	0.3946	0.1973	-	-	-	-
7	previously not reported	CDC7	1:91966445:A:G	1	91966445	A	G	1:91965850:C:T	rs13447450	1	91965850	C	T	0.944475	upstream_gene_variant	MODIFIER	CDC7	ENSG00000097046	protein_coding	-	-	-	-	-	-	-	rs13447450	815	1	Ensembl	-	-	-	-	-	0.1635	0.031	0.2017	0.0476	0.3936	0.1984	-	-	-	-
7	previously not reported	CDC7	1:91966445:A:G	1	91966445	A	G	1:91966445:A:G	rs13447455	1	91966445	A	G	1	upstream_gene_variant	MODIFIER	CDC7	ENSG00000097046	protein_coding	-	-	-	-	-	-	-	rs13447455	220	1	Ensembl	-	-	-	-	-	0.1723	0.056	0.2061	0.0476	0.3946	0.2055	-	-	-	-
8	previously not reported	GJA5	1:146598683:A:G	1	146598683	G	A	1:146569163:D:I	rs76598582	1	146569163	I	C	0.922983	intron_variant,non_coding_transcript_variant	MODIFIER	NBPF13P	ENSG00000227242	unprocessed_pseudogene	-	14/27	-	-	-	-	-	rs76598582	-	-1	Ensembl	-	-	-	-	-	0.1695	0.0567	0.2061	0.1319	0.2406	0.2618	-	-	-	-
8	previously not reported	GJA5	1:146598683:A:G	1	146598683	G	A	1:146570006:C:T	rs61838936	1	146570006	C	T	0.928223	intron_variant,non_coding_transcript_variant	MODIFIER	NBPF13P	ENSG00000227242	unprocessed_pseudogene	-	14/27	-	-	-	-	-	rs61838936	-	-1	Ensembl	-	-	-	-	-	0.1577	0.0076	0.2061	0.1319	0.2416	0.2669	-	-	-	-
8	previously not reported	GJA5	1:146598683:A:G	1	146598683	G	A	1:146570076:A:G	rs7514808	1	146570076	G	A	0.928223	intron_variant,non_coding_transcript_variant	MODIFIER	NBPF13P	ENSG00000227242	unprocessed_pseudogene	-	14/27	-	-	-	-	-	rs7514808	-	-1	Ensembl	-	-	-	-	-	0.1899	0.1233	0.2176	0.1319	0.2416	0.2669	-	-	-	-
8	previously not reported	GJA5	1:146598683:A:G	1	146598683	G	A	1:146570268:C:T	rs7523975	1	146570268	C	T	0.933497	intron_variant,non_coding_transcript_variant	MODIFIER	NBPF13P	ENSG00000227242	unprocessed_pseudogene	-	14/27	-	-	-	-	-	rs7523975	-	-1	Ensembl	-	-	-	-	-	0.2656	0.3843	0.2334	0.1339	0.2425	0.2873	-	-	-	-
8	previously not reported	GJA5	1:146598683:A:G	1	146598683	G	A	1:146572373:A:T	rs61838937	1	146572373	T	A	0.933497	intron_variant,non_coding_transcript_variant	MODIFIER	NBPF13P	ENSG00000227242	unprocessed_pseudogene	-	14/27	-	-	-	-	-	rs61838937	-	-1	Ensembl	-	-	-	-	-	0.265	0.3843	0.2334	0.1319	0.2425	0.2863	-	-	-	-
8	previously not reported	GJA5	1:146598683:A:G	1	146598683	G	A	1:146572584:D:I	rs587677415	1	146572584	I	A	0.901174	intron_variant,non_coding_transcript_variant	MODIFIER	NBPF13P	ENSG00000227242	unprocessed_pseudogene	-	14/27	-	-	-	-	-	rs587677415	-	-1	Ensembl	-	-	-	-	-	0.264	0.3843	0.232	0.1359	0.2406	0.2802	-	-	-	-
8	previously not reported	GJA5	1:146598683:A:G	1	146598683	G	A	1:146575945:A:C	rs4950367	1	146575945	C	A	0.952797	intron_variant,non_coding_transcript_variant	MODIFIER	NBPF13P	ENSG00000227242	unprocessed_pseudogene	-	14/27	-	-	-	-	-	rs4950367	-	-1	Ensembl	-	-	-	-	-	0.2632	0.3843	0.2277	0.1319	0.2386	0.2853	-	-	-	-
8	previously not reported	GJA5	1:146598683:A:G	1	146598683	G	A	1:146576897:D:I	rs150837924	1	146576897	I	G	0.947495	intron_variant,non_coding_transcript_variant	MODIFIER	NBPF13P	ENSG00000227242	unprocessed_pseudogene	-	14/27	-	-	-	-	-	rs150837924	-	-1	Ensembl	-	-	-	-	-	0.1559	0.0076	0.2003	0.1319	0.2376	0.2658	-	-	-	-
8	previously not reported	GJA5	1:146598683:A:G	1	146598683	G	A	1:146577525:A:G	rs61838938	1	146577525	G	A	0.928223	intron_variant,non_coding_transcript_variant	MODIFIER	NBPF13P	ENSG00000227242	unprocessed_pseudogene	-	14/27	-	-	-	-	-	rs61838938	-	-1	Ensembl	-	-	-	-	-	0.2101	0.1967	0.2233	0.1319	0.2416	0.2669	-	-	-	-
8	previously not reported	GJA5	1:146598683:A:G	1	146598683	G	A	1:146577541:D:I	rs79117302	1	146577541	I	C	0.928223	intron_variant,non_coding_transcript_variant	MODIFIER	NBPF13P	ENSG00000227242	unprocessed_pseudogene	-	14/27	-	-	-	-	-	rs79117302	-	-1	Ensembl	-	-	-	-	-	0.2101	0.1967	0.2233	0.1319	0.2416	0.2669	-	-	-	-
8	previously not reported	GJA5	1:146598683:A:G	1	146598683	G	A	1:146577889:C:T	rs56012243	1	146577889	C	T	0.928223	intron_variant,non_coding_transcript_variant	MODIFIER	NBPF13P	ENSG00000227242	unprocessed_pseudogene	-	14/27	-	-	-	-	-	rs56012243	-	-1	Ensembl	-	-	-	-	-	0.2099	0.1959	0.2233	0.1319	0.2416	0.2669	-	-	-	-
8	previously not reported	GJA5	1:146598683:A:G	1	146598683	G	A	1:146578201:D:I	rs372870145	1	146578201	D	I	0.933157	intron_variant,non_coding_transcript_variant	MODIFIER	NBPF13P	ENSG00000227242	unprocessed_pseudogene	-	14/27	-	-	-	-	-	rs372870145	-	-1	Ensembl	-	-	-	-	-	0.2087	0.1952	0.2219	0.131	0.2406	0.2648	-	-	-	-
8	previously not reported	GJA5	1:146598683:A:G	1	146598683	G	A	1:146578226:C:T	rs11809709	1	146578226	T	C	0.928223	intron_variant,non_coding_transcript_variant	MODIFIER	NBPF13P	ENSG00000227242	unprocessed_pseudogene	-	14/27	-	-	-	-	-	rs11809709	-	-1	Ensembl	-	-	-	-	-	0.2097	0.1952	0.2233	0.1319	0.2416	0.2669	-	-	-	-
8	previously not reported	GJA5	1:146598683:A:G	1	146598683	G	A	1:146578261:A:C	rs11809327	1	146578261	A	C	0.928223	intron_variant,non_coding_transcript_variant	MODIFIER	NBPF13P	ENSG00000227242	unprocessed_pseudogene	-	14/27	-	-	-	-	-	rs11809327	-	-1	Ensembl	-	-	-	-	-	0.2097	0.1952	0.2233	0.1319	0.2416	0.2669	-	-	-	-
8	previously not reported	GJA5	1:146598683:A:G	1	146598683	G	A	1:146578263:D:I	rs11809328	1	146578263	D	I	0.924266	intron_variant,non_coding_transcript_variant	MODIFIER	NBPF13P	ENSG00000227242	unprocessed_pseudogene	-	14/27	-	-	-	-	-	rs11809328	-	-1	Ensembl	-	-	-	-	-	0.2099	0.1959	0.2233	0.1319	0.2416	0.2669	-	-	-	-
8	previously not reported	GJA5	1:146598683:A:G	1	146598683	G	A	1:146578307:A:T	rs11809339	1	146578307	A	T	0.928223	intron_variant,non_coding_transcript_variant	MODIFIER	NBPF13P	ENSG00000227242	unprocessed_pseudogene	-	14/27	-	-	-	-	-	rs11809339	-	-1	Ensembl	-	-	-	-	-	0.2097	0.1952	0.2233	0.1319	0.2416	0.2669	-	-	-	-
8	previously not reported	GJA5	1:146598683:A:G	1	146598683	G	A	1:146579259:C:G	rs55828524	1	146579259	G	C	0.928223	intron_variant,non_coding_transcript_variant	MODIFIER	NBPF13P	ENSG00000227242	unprocessed_pseudogene	-	14/27	-	-	-	-	-	rs55828524	-	-1	Ensembl	-	-	-	-	-	0.2101	0.1959	0.2248	0.1319	0.2416	0.2669	-	-	-	-
8	previously not reported	GJA5	1:146598683:A:G	1	146598683	G	A	1:146579535:A:C	rs55963049	1	146579535	C	A	0.928223	intron_variant,non_coding_transcript_variant	MODIFIER	NBPF13P	ENSG00000227242	unprocessed_pseudogene	-	14/27	-	-	-	-	-	rs55963049	-	-1	Ensembl	-	-	-	-	-	0.1579	0.0083	0.2061	0.1319	0.2416	0.2669	-	-	-	-
8	previously not reported	GJA5	1:146598683:A:G	1	146598683	G	A	1:146579574:C:T	rs17355398	1	146579574	C	T	0.928223	intron_variant,non_coding_transcript_variant	MODIFIER	NBPF13P	ENSG00000227242	unprocessed_pseudogene	-	14/27	-	-	-	-	-	rs17355398	-	-1	Ensembl	-	-	-	-	-	0.2099	0.1959	0.2233	0.1319	0.2416	0.2669	-	-	-	-
8	previously not reported	GJA5	1:146598683:A:G	1	146598683	G	A	1:146579688:A:G	rs55791847	1	146579688	A	G	0.928223	intron_variant,non_coding_transcript_variant	MODIFIER	NBPF13P	ENSG00000227242	unprocessed_pseudogene	-	14/27	-	-	-	-	-	rs55791847	-	-1	Ensembl	-	-	-	-	-	0.2099	0.1959	0.2233	0.1319	0.2416	0.2669	-	-	-	-
8	previously not reported	GJA5	1:146598683:A:G	1	146598683	G	A	1:146581118:C:T	rs11811023	1	146581118	T	C	0.928223	intron_variant,non_coding_transcript_variant	MODIFIER	NBPF13P	ENSG00000227242	unprocessed_pseudogene	-	14/27	-	-	-	-	-	rs11811023	-	-1	Ensembl	-	-	-	-	-	0.1971	0.1551	0.2161	0.131	0.2416	0.2628	-	-	-	-
8	previously not reported	GJA5	1:146598683:A:G	1	146598683	G	A	1:146581676:C:T	rs17355419	1	146581676	T	C	0.947495	intron_variant,non_coding_transcript_variant	MODIFIER	NBPF13P	ENSG00000227242	unprocessed_pseudogene	-	13/27	-	-	-	-	-	rs17355419	-	-1	Ensembl	-	-	-	-	-	0.1949	0.1543	0.2104	0.131	0.2376	0.2607	-	-	-	-
8	previously not reported	GJA5	1:146598683:A:G	1	146598683	G	A	1:146581801:A:G	rs72706428	1	146581801	G	A	0.947495	intron_variant,non_coding_transcript_variant	MODIFIER	NBPF13P	ENSG00000227242	unprocessed_pseudogene	-	13/27	-	-	-	-	-	rs72706428	-	-1	Ensembl	-	-	-	-	-	0.1951	0.1551	0.2104	0.131	0.2376	0.2607	-	-	-	-
8	previously not reported	GJA5	1:146598683:A:G	1	146598683	G	A	1:146581857:C:T	rs61838944	1	146581857	C	T	0.947495	intron_variant,non_coding_transcript_variant	MODIFIER	NBPF13P	ENSG00000227242	unprocessed_pseudogene	-	13/27	-	-	-	-	-	rs61838944	-	-1	Ensembl	-	-	-	-	-	0.1951	0.1551	0.2104	0.131	0.2376	0.2607	-	-	-	-
8	previously not reported	GJA5	1:146598683:A:G	1	146598683	G	A	1:146582208:D:I	rs5777623	1	146582208	I	A	0.947495	intron_variant,non_coding_transcript_variant	MODIFIER	NBPF13P	ENSG00000227242	unprocessed_pseudogene	-	13/27	-	-	-	-	-	rs5777623	-	-1	Ensembl	-	-	-	-	-	0.1951	0.1551	0.2104	0.131	0.2376	0.2607	-	-	-	-
8	previously not reported	GJA5	1:146598683:A:G	1	146598683	G	A	1:146582724:C:G	rs972368	1	146582724	C	G	0.952619	intron_variant,non_coding_transcript_variant	MODIFIER	NBPF13P	ENSG00000227242	unprocessed_pseudogene	-	12/27	-	-	-	-	-	rs972368	-	-1	Ensembl	-	-	-	-	-	0.1673	0.0545	0.2032	0.131	0.2366	0.2607	-	-	-	-
8	previously not reported	GJA5	1:146598683:A:G	1	146598683	G	A	1:146582876:D:I	rs75618619	1	146582876	I	T	0.947495	intron_variant,non_coding_transcript_variant	MODIFIER	NBPF13P	ENSG00000227242	unprocessed_pseudogene	-	12/27	-	-	-	-	-	rs75618619	-	-1	Ensembl	-	-	-	-	-	0.1679	0.0552	0.2032	0.1319	0.2376	0.2607	-	-	-	-
8	previously not reported	GJA5	1:146598683:A:G	1	146598683	G	A	1:146583059:G:T	rs61838945	1	146583059	G	T	0.942225	intron_variant,non_coding_transcript_variant	MODIFIER	NBPF13P	ENSG00000227242	unprocessed_pseudogene	-	12/27	-	-	-	-	-	rs61838945	-	-1	Ensembl	-	-	-	-	-	-	-	-	-	-	-	-	-	-	-
8	previously not reported	GJA5	1:146598683:A:G	1	146598683	G	A	1:146583429:A:G	rs56864370	1	146583429	A	G	0.895273	intron_variant,non_coding_transcript_variant	MODIFIER	NBPF13P	ENSG00000227242	unprocessed_pseudogene	-	12/27	-	-	-	-	-	rs56864370	-	-1	Ensembl	-	-	-	-	-	0.1981	0.1551	0.2133	0.131	0.2485	0.2628	-	-	-	-
8	previously not reported	GJA5	1:146598683:A:G	1	146598683	G	A	1:146583568:A:G	rs6686480	1	146583568	G	A	0.947495	non_coding_transcript_exon_variant	MODIFIER	NBPF13P	ENSG00000227242	unprocessed_pseudogene	12/28	-	1526	-	-	-	-	rs6686480	-	-1	Ensembl	-	-	-	-	-	0.1949	0.1551	0.2104	0.131	0.2376	0.2597	-	-	-	-
8	previously not reported	GJA5	1:146598683:A:G	1	146598683	G	A	1:146583569:A:T	rs6700783	1	146583569	A	T	0.947495	non_coding_transcript_exon_variant	MODIFIER	NBPF13P	ENSG00000227242	unprocessed_pseudogene	12/28	-	1525	-	-	-	-	rs6700783	-	-1	Ensembl	-	-	-	-	-	0.1947	0.1543	0.2104	0.131	0.2376	0.2597	-	-	-	-
8	previously not reported	GJA5	1:146598683:A:G	1	146598683	G	A	1:146584161:C:G	rs1813002	1	146584161	C	G	0.928223	intron_variant,non_coding_transcript_variant	MODIFIER	NBPF13P	ENSG00000227242	unprocessed_pseudogene	-	11/27	-	-	-	-	-	rs1813002	-	-1	Ensembl	-	-	-	-	-	0.1973	0.1551	0.2161	0.131	0.2416	0.2638	-	-	-	-
8	previously not reported	GJA5	1:146598683:A:G	1	146598683	G	A	1:146584316:A:T	rs61838947	1	146584316	T	A	0.947495	splice_region_variant,non_coding_transcript_exon_variant	LOW	NBPF13P	ENSG00000227242	unprocessed_pseudogene	11/28	-	1402	-	-	-	-	rs61838947	-	-1	Ensembl	-	-	-	-	-	0.1675	0.0545	0.2032	0.131	0.2376	0.2607	-	-	-	-
8	previously not reported	GJA5	1:146598683:A:G	1	146598683	G	A	1:146584337:A:G	rs76757751	1	146584337	G	A	0.947495	intron_variant,non_coding_transcript_variant	MODIFIER	NBPF13P	ENSG00000227242	unprocessed_pseudogene	-	10/27	-	-	-	-	-	rs76757751	-	-1	Ensembl	-	-	-	-	-	0.1951	0.1551	0.2104	0.131	0.2376	0.2607	-	-	-	-
8	previously not reported	GJA5	1:146598683:A:G	1	146598683	G	A	1:146585825:A:G	rs4950371	1	146585825	G	A	0.947495	non_coding_transcript_exon_variant	MODIFIER	NBPF13P	ENSG00000227242	unprocessed_pseudogene	9/28	-	1206	-	-	-	-	rs4950371	-	-1	Ensembl	-	-	-	-	-	0.1552	0.0091	0.2003	0.131	0.2376	0.2607	-	-	-	-
8	previously not reported	GJA5	1:146598683:A:G	1	146598683	G	A	1:146587663:C:T	rs61838951	1	146587663	T	C	0.928223	intron_variant,non_coding_transcript_variant	MODIFIER	NBPF13P	ENSG00000227242	unprocessed_pseudogene	-	7/27	-	-	-	-	-	rs61838951	-	-1	Ensembl	-	-	-	-	-	0.1693	0.0545	0.2089	0.131	0.2416	0.2618	-	-	-	-
8	previously not reported	GJA5	1:146598683:A:G	1	146598683	G	A	1:146588267:C:T	rs4950304	1	146588267	C	T	0.928223	intron_variant,non_coding_transcript_variant	MODIFIER	NBPF13P	ENSG00000227242	unprocessed_pseudogene	-	6/27	-	-	-	-	-	rs4950304	-	-1	Ensembl	-	-	-	-	-	0.1967	0.1551	0.2161	0.131	0.2416	0.2607	-	-	-	-
8	previously not reported	GJA5	1:146598683:A:G	1	146598683	G	A	1:146588768:A:G	rs7541393	1	146588768	G	A	0.947495	intron_variant,non_coding_transcript_variant	MODIFIER	NBPF13P	ENSG00000227242	unprocessed_pseudogene	-	6/27	-	-	-	-	-	rs7541393	-	-1	Ensembl	-	-	-	-	-	0.1953	0.1566	0.2104	0.131	0.2376	0.2597	-	-	-	-
8	previously not reported	GJA5	1:146598683:A:G	1	146598683	G	A	1:146588793:C:G	rs56198825	1	146588793	G	C	0.886782	intron_variant,non_coding_transcript_variant	MODIFIER	NBPF13P	ENSG00000227242	unprocessed_pseudogene	-	6/27	-	-	-	-	-	rs56198825	-	-1	Ensembl	-	-	-	-	-	0.1542	0.0076	0.196	0.126	0.2376	0.2658	-	-	-	-
8	previously not reported	GJA5	1:146598683:A:G	1	146598683	G	A	1:146589003:C:T	rs56151278	1	146589003	T	C	0.928223	intron_variant,non_coding_transcript_variant	MODIFIER	NBPF13P	ENSG00000227242	unprocessed_pseudogene	-	6/27	-	-	-	-	-	rs56151278	-	-1	Ensembl	-	-	-	-	-	0.1564	0.0076	0.2061	0.131	0.2416	0.2607	-	-	-	-
8	previously not reported	GJA5	1:146598683:A:G	1	146598683	G	A	1:146589293:A:C	rs4950305	1	146589293	C	A	0.928223	non_coding_transcript_exon_variant	MODIFIER	NBPF13P	ENSG00000227242	unprocessed_pseudogene	6/28	-	837	-	-	-	-	rs4950305	-	-1	Ensembl	-	-	-	-	-	0.1967	0.1551	0.2161	0.131	0.2416	0.2607	-	-	-	-
8	previously not reported	GJA5	1:146598683:A:G	1	146598683	G	A	1:146589420:C:G	rs4950306	1	146589420	C	G	0.928223	intron_variant,non_coding_transcript_variant	MODIFIER	NBPF13P	ENSG00000227242	unprocessed_pseudogene	-	5/27	-	-	-	-	-	rs4950306	-	-1	Ensembl	-	-	-	-	-	0.1564	0.0076	0.2061	0.131	0.2416	0.2607	-	-	-	-
8	previously not reported	GJA5	1:146598683:A:G	1	146598683	G	A	1:146589791:D:I	rs371413942	1	146589791	D	I	0.843816	intron_variant,non_coding_transcript_variant	MODIFIER	NBPF13P	ENSG00000227242	unprocessed_pseudogene	-	5/27	-	-	-	-	-	rs371413942	-	-1	Ensembl	-	-	-	-	-	0.1957	0.1573	0.2147	0.1359	0.2396	0.2505	-	-	-	-
8	previously not reported	GJA5	1:146598683:A:G	1	146598683	G	A	1:146590081:C:T	rs2014106	1	146590081	C	T	0.942406	intron_variant,non_coding_transcript_variant	MODIFIER	NBPF13P	ENSG00000227242	unprocessed_pseudogene	-	5/27	-	-	-	-	-	rs2014106	-	-1	Ensembl	-	-	-	-	-	0.1683	0.0545	0.2032	0.131	0.2386	0.2638	-	-	-	-
8	previously not reported	GJA5	1:146598683:A:G	1	146598683	G	A	1:146591674:C:T	rs4950308	1	146591674	C	T	0.947495	intron_variant,non_coding_transcript_variant	MODIFIER	NBPF13P	ENSG00000227242	unprocessed_pseudogene	-	4/27	-	-	-	-	-	rs4950308	-	-1	Ensembl	-	-	-	-	-	0.1949	0.1551	0.2104	0.129	0.2376	0.2618	-	-	-	-
8	previously not reported	GJA5	1:146598683:A:G	1	146598683	G	A	1:146592098:C:T	rs7514970	1	146592098	C	T	0.947495	intron_variant,non_coding_transcript_variant	MODIFIER	NBPF13P	ENSG00000227242	unprocessed_pseudogene	-	3/27	-	-	-	-	-	rs7514970	-	-1	Ensembl	-	-	-	-	-	0.1777	0.0915	0.2046	0.131	0.2376	0.2618	-	-	-	-
8	previously not reported	GJA5	1:146598683:A:G	1	146598683	G	A	1:146592123:C:T	rs17355474	1	146592123	C	T	0.947495	intron_variant,non_coding_transcript_variant	MODIFIER	NBPF13P	ENSG00000227242	unprocessed_pseudogene	-	3/27	-	-	-	-	-	rs17355474	-	-1	Ensembl	-	-	-	-	-	0.1677	0.0545	0.2032	0.131	0.2376	0.2618	-	-	-	-
8	previously not reported	GJA5	1:146598683:A:G	1	146598683	G	A	1:146592296:C:T	rs7515160	1	146592296	C	T	0.984075	intron_variant,non_coding_transcript_variant	MODIFIER	NBPF13P	ENSG00000227242	unprocessed_pseudogene	-	3/27	-	-	-	-	-	rs7515160	-	-1	Ensembl	-	-	-	-	-	0.1919	0.1543	0.2089	0.131	0.2306	0.2536	-	-	-	-
8	previously not reported	GJA5	1:146598683:A:G	1	146598683	G	A	1:146592787:C:T	rs55697094	1	146592787	T	C	0.963199	intron_variant,non_coding_transcript_variant	MODIFIER	NBPF13P	ENSG00000227242	unprocessed_pseudogene	-	2/27	-	-	-	-	-	rs55697094	-	-1	Ensembl	-	-	-	-	-	0.1675	0.0567	0.2118	0.131	0.2346	0.2546	-	-	-	-
8	previously not reported	GJA5	1:146598683:A:G	1	146598683	G	A	1:146593119:A:G	rs17359629	1	146593119	G	A	0.984075	intron_variant,non_coding_transcript_variant	MODIFIER	NBPF13P	ENSG00000227242	unprocessed_pseudogene	-	2/27	-	-	-	-	-	rs17359629	-	-1	Ensembl	-	-	-	-	-	0.1937	0.1581	0.2133	0.1319	0.2306	0.2536	-	-	-	-
8	previously not reported	GJA5	1:146598683:A:G	1	146598683	G	A	1:146593878:A:T	rs2083720	1	146593878	A	T	0.994675	intron_variant,non_coding_transcript_variant	MODIFIER	NBPF13P	ENSG00000227242	unprocessed_pseudogene	-	2/27	-	-	-	-	-	rs2083720	-	-1	Ensembl	-	-	-	-	-	0.1671	0.0598	0.2061	0.131	0.2326	0.2546	-	-	-	-
8	previously not reported	GJA5	1:146598683:A:G	1	146598683	G	A	1:146594183:C:T	rs72706441	1	146594183	C	T	0.994675	intron_variant,non_coding_transcript_variant	MODIFIER	NBPF13P	ENSG00000227242	unprocessed_pseudogene	-	2/27	-	-	-	-	-	rs72706441	-	-1	Ensembl	-	-	-	-	-	0.1671	0.0567	0.2061	0.1339	0.2326	0.2556	-	-	-	-
8	previously not reported	GJA5	1:146598683:A:G	1	146598683	G	A	1:146594721:C:T	rs17355509	1	146594721	C	T	1	intron_variant,non_coding_transcript_variant	MODIFIER	NBPF13P	ENSG00000227242	unprocessed_pseudogene	-	2/27	-	-	-	-	-	rs17355509	-	-1	Ensembl	-	-	-	-	-	0.1681	0.059	0.2061	0.1349	0.2336	0.2556	-	-	-	-
8	previously not reported	GJA5	1:146598683:A:G	1	146598683	G	A	1:146594895:A:G	rs78477491	1	146594895	G	A	1	intron_variant,non_coding_transcript_variant	MODIFIER	NBPF13P	ENSG00000227242	unprocessed_pseudogene	-	2/27	-	-	-	-	-	rs78477491	-	-1	Ensembl	-	-	-	-	-	0.1681	0.0598	0.2061	0.1339	0.2336	0.2556	-	-	-	-
8	previously not reported	GJA5	1:146598683:A:G	1	146598683	G	A	1:146595040:D:I	rs587594154	1	146595040	D	I	0.936202	intron_variant,non_coding_transcript_variant	MODIFIER	NBPF13P	ENSG00000227242	unprocessed_pseudogene	-	2/27	-	-	-	-	-	rs587594154	-	-1	Ensembl	-	-	-	-	-	0.1773	0.0809	0.2089	0.1339	0.2376	0.2679	-	-	-	-
8	previously not reported	GJA5	1:146598683:A:G	1	146598683	G	A	1:146595897:G:T	rs72706444	1	146595897	G	T	0.979272	intron_variant,non_coding_transcript_variant	MODIFIER	NBPF13P	ENSG00000227242	unprocessed_pseudogene	-	1/27	-	-	-	-	-	rs72706444	-	-1	Ensembl	-	-	-	-	-	0.1697	0.059	0.2118	0.1339	0.2376	0.2566	-	-	-	-
8	previously not reported	GJA5	1:146598683:A:G	1	146598683	G	A	1:146596398:C:T	rs4950373	1	146596398	C	T	0.800946	upstream_gene_variant	MODIFIER	NBPF13P	ENSG00000227242	unprocessed_pseudogene	-	-	-	-	-	-	-	rs4950373	291	-1	Ensembl	-	-	-	-	-	0.2344	0.1687	0.2522	0.1349	0.2803	0.3661	-	-	-	-
8	previously not reported	GJA5	1:146598683:A:G	1	146598683	G	A	1:146596545:C:T	rs4950374	1	146596545	C	T	0.800946	upstream_gene_variant	MODIFIER	NBPF13P	ENSG00000227242	unprocessed_pseudogene	-	-	-	-	-	-	-	rs4950374	438	-1	Ensembl	-	-	-	-	-	0.2344	0.1687	0.2522	0.1349	0.2803	0.3661	-	-	-	-
8	previously not reported	GJA5	1:146598683:A:G	1	146598683	G	A	1:146596747:C:T	rs4950375	1	146596747	T	C	0.979272	upstream_gene_variant	MODIFIER	NBPF13P	ENSG00000227242	unprocessed_pseudogene	-	-	-	-	-	-	-	rs4950375	640	-1	Ensembl	-	-	-	-	-	0.1697	0.059	0.2118	0.1339	0.2376	0.2566	-	-	-	-
8	previously not reported	GJA5	1:146598683:A:G	1	146598683	G	A	1:146596858:A:G	rs4950377	1	146596858	G	A	0.979272	upstream_gene_variant	MODIFIER	NBPF13P	ENSG00000227242	unprocessed_pseudogene	-	-	-	-	-	-	-	rs4950377	751	-1	Ensembl	-	-	-	-	-	0.1705	0.0613	0.2118	0.1339	0.2376	0.2577	-	-	-	-
8	previously not reported	GJA5	1:146598683:A:G	1	146598683	G	A	1:146596998:G:T	rs113357012	1	146596998	T	G	0.800946	upstream_gene_variant	MODIFIER	NBPF13P	ENSG00000227242	unprocessed_pseudogene	-	-	-	-	-	-	-	rs113357012	891	-1	Ensembl	-	-	-	-	-	0.2342	0.1687	0.2507	0.1349	0.2803	0.3661	-	-	-	-
8	previously not reported	GJA5	1:146598683:A:G	1	146598683	G	A	1:146597281:G:T	rs200448018	1	146597281	G	T	0.800946	upstream_gene_variant	MODIFIER	NBPF13P	ENSG00000227242	unprocessed_pseudogene	-	-	-	-	-	-	-	rs200448018	1174	-1	Ensembl	-	-	-	-	-	0.2344	0.1687	0.2522	0.1349	0.2803	0.3661	-	-	-	-
8	previously not reported	GJA5	1:146598683:A:G	1	146598683	G	A	1:146597550:A:C	rs200887294	1	146597550	A	C	0.973973	upstream_gene_variant	MODIFIER	NBPF13P	ENSG00000227242	unprocessed_pseudogene	-	-	-	-	-	-	-	rs200887294	1443	-1	Ensembl	-	-	-	-	-	0.1681	0.0537	0.2118	0.1339	0.2366	0.2566	-	-	-	-
8	previously not reported	GJA5	1:146598683:A:G	1	146598683	G	A	1:146597651:A:G	rs202080163	1	146597651	A	G	0.979272	upstream_gene_variant	MODIFIER	NBPF13P	ENSG00000227242	unprocessed_pseudogene	-	-	-	-	-	-	-	rs202080163	1544	-1	Ensembl	-	-	-	-	-	0.1697	0.059	0.2118	0.1339	0.2376	0.2566	-	-	-	-
8	previously not reported	GJA5	1:146598683:A:G	1	146598683	G	A	1:146597809:C:T	rs111732922	1	146597809	C	T	0.800946	upstream_gene_variant	MODIFIER	NBPF13P	ENSG00000227242	unprocessed_pseudogene	-	-	-	-	-	-	-	rs111732922	1702	-1	Ensembl	-	-	-	-	-	0.2344	0.1687	0.2522	0.1359	0.2803	0.365	-	-	-	-
8	previously not reported	GJA5	1:146598683:A:G	1	146598683	G	A	1:146597835:A:G	rs374237045	1	146597835	G	A	0.800946	upstream_gene_variant	MODIFIER	NBPF13P	ENSG00000227242	unprocessed_pseudogene	-	-	-	-	-	-	-	rs374237045	1728	-1	Ensembl	-	-	-	-	-	0.2344	0.1687	0.2522	0.1349	0.2803	0.3661	-	-	-	-
8	previously not reported	GJA5	1:146598683:A:G	1	146598683	G	A	1:146598499:A:T	rs186990229	1	146598499	A	T	0.898747	upstream_gene_variant	MODIFIER	NBPF13P	ENSG00000227242	unprocessed_pseudogene	-	-	-	-	-	-	-	rs186990229	2392	-1	Ensembl	-	-	-	-	-	0.146	0.0061	0.1945	0.127	0.2197	0.2444	-	-	-	-
8	previously not reported	GJA5	1:146598683:A:G	1	146598683	G	A	1:146598683:A:G	rs112057010	1	146598683	G	A	1	upstream_gene_variant	MODIFIER	NBPF13P	ENSG00000227242	unprocessed_pseudogene	-	-	-	-	-	-	-	rs112057010	2576	-1	Ensembl	-	-	-	-	-	0.1681	0.0598	0.2061	0.1339	0.2336	0.2556	-	-	-	-
8	previously not reported	GJA5	1:146598683:A:G	1	146598683	G	A	1:146599172:A:C	rs57337646	1	146599172	C	A	0.800946	upstream_gene_variant	MODIFIER	NBPF13P	ENSG00000227242	unprocessed_pseudogene	-	-	-	-	-	-	-	rs57337646	3065	-1	Ensembl	-	-	-	-	-	0.2344	0.1687	0.2522	0.1349	0.2803	0.3661	-	-	-	-
8	previously not reported	GJA5	1:146598683:A:G	1	146598683	G	A	1:146599856:A:G	rs4950309	1	146599856	G	A	0.812265	upstream_gene_variant	MODIFIER	NBPF13P	ENSG00000227242	unprocessed_pseudogene	-	-	-	-	-	-	-	rs4950309	3749	-1	Ensembl	-	-	-	-	-	0.2328	0.1657	0.2507	0.1349	0.2773	0.3661	-	-	-	-
8	previously not reported	GJA5	1:146598683:A:G	1	146598683	G	A	1:146600607:G:T	rs2008414	1	146600607	T	G	0.800946	upstream_gene_variant	MODIFIER	NBPF13P	ENSG00000227242	unprocessed_pseudogene	-	-	-	-	-	-	-	rs2008414	4500	-1	Ensembl	-	-	-	-	-	0.2344	0.1687	0.2522	0.1349	0.2803	0.3661	-	-	-	-
8	previously not reported	GJA5	1:146598683:A:G	1	146598683	G	A	1:146600652:D:I	rs5777625	1	146600652	D	I	0.800946	upstream_gene_variant	MODIFIER	NBPF13P	ENSG00000227242	unprocessed_pseudogene	-	-	-	-	-	-	-	rs5777625	4545	-1	Ensembl	-	-	-	-	-	0.235	0.1717	0.2507	0.1349	0.2803	0.3661	-	-	-	-
8	previously not reported	GJA5	1:146598683:A:G	1	146598683	G	A	1:146601102:C:G	rs55799799	1	146601102	G	C	0.973973	upstream_gene_variant	MODIFIER	NBPF13P	ENSG00000227242	unprocessed_pseudogene	-	-	-	-	-	-	-	rs55799799	4995	-1	Ensembl	-	-	-	-	-	0.1681	0.0537	0.2118	0.1339	0.2366	0.2566	-	-	-	-
8	previously not reported	GJA5	1:146598683:A:G	1	146598683	G	A	1:146601485:A:G	rs1822309	1	146601485	G	A	0.973973	intergenic_variant	MODIFIER	-	-	-	-	-	-	-	-	-	-	rs1822309	-	-	-	-	-	-	-	-	0.1558	0.0068	0.2104	0.1339	0.2366	0.2577	-	-	-	-
8	previously not reported	GJA5	1:146598683:A:G	1	146598683	G	A	1:146609028:C:T	rs72706458	1	146609028	T	C	0.979272	intergenic_variant	MODIFIER	-	-	-	-	-	-	-	-	-	-	rs72706458	-	-	-	-	-	-	-	-	0.1701	0.059	0.2133	0.1339	0.2376	0.2577	-	-	-	-
8	previously not reported	GJA5	1:146598683:A:G	1	146598683	G	A	1:146610109:C:T	rs7538682	1	146610109	C	T	0.949468	intergenic_variant	MODIFIER	-	-	-	-	-	-	-	-	-	-	rs7538682	-	-	-	-	-	-	-	-	0.2887	0.3268	0.245	0.3323	0.2435	0.2699	-	-	-	-
8	previously not reported	GJA5	1:146598683:A:G	1	146598683	G	A	1:146619170:D:I	rs35339932	1	146619170	I	T	0.994675	intergenic_variant	MODIFIER	-	-	-	-	-	-	-	-	-	-	rs35339932	-	-	-	-	-	-	-	-	0.1669	0.0537	0.2061	0.1339	0.2326	0.2587	-	-	-	-
8	previously not reported	GJA5	1:146598683:A:G	1	146598683	G	A	1:146620153:C:T	rs6660507	1	146620153	T	C	0.968812	intergenic_variant	MODIFIER	-	-	-	-	-	-	-	-	-	-	rs6660507	-	-	-	-	-	-	-	-	0.3063	0.3979	0.2435	0.3323	0.2396	0.2689	-	-	-	-
8	previously not reported	GJA5	1:146598683:A:G	1	146598683	G	A	1:146637585:C:T	rs4950379	1	146637585	C	T	0.927237	intron_variant	MODIFIER	PRKAB2	ENSG00000131791	protein_coding	-	5/7	-	-	-	-	-	rs4950379	-	-1	Ensembl	-	-	-	-	-	0.1546	0.0068	0.2003	0.1339	0.2376	0.2577	-	-	-	-
8	previously not reported	GJA5	1:146598683:A:G	1	146598683	G	A	1:146637944:D:I	rs10579069	1	146637944	I	C	0.922233	intron_variant	MODIFIER	PRKAB2	ENSG00000131791	protein_coding	-	5/7	-	-	-	-	-	rs10579069	-	-1	Ensembl	-	-	-	-	-	0.1548	0.0076	0.2003	0.1339	0.2386	0.2566	-	-	-	-
8	previously not reported	GJA5	1:146598683:A:G	1	146598683	G	A	1:146641686:A:T	rs3766522	1	146641686	A	T	0.968237	intron_variant	MODIFIER	PRKAB2	ENSG00000131791	protein_coding	-	2/7	-	-	-	-	-	rs3766522	-	-1	Ensembl	-	-	-	-	-	0.1783	0.0968	0.2061	0.1359	0.2316	0.2577	-	-	-	22305490,23396962,25740917
8	previously not reported	GJA5	1:146598683:A:G	1	146598683	G	A	1:146644199:A:C	rs115179956	1	146644199	C	A	0.904186	upstream_gene_variant	MODIFIER	PRKAB2	ENSG00000131791	protein_coding	-	-	-	-	-	-	-	rs115179956	76	-1	Ensembl	-	-	-	-	-	0.3183	0.4455	0.2478	0.3234	0.2445	0.2669	-	-	-	-
8	previously not reported	GJA5	1:146598683:A:G	1	146598683	G	A	1:146648224:C:T	rs4950382	1	146648224	C	T	0.900129	upstream_gene_variant	MODIFIER	PRKAB2	ENSG00000131791	protein_coding	-	-	-	-	-	-	-	rs4950382	4101	-1	Ensembl	-	-	-	-	-	0.3033	0.3865	0.2478	0.3234	0.2455	0.2689	-	-	-	-
8	previously not reported	GJA5	1:146598683:A:G	1	146598683	G	A	1:146648889:C:G	rs4950384	1	146648889	G	C	0.932894	upstream_gene_variant	MODIFIER	PRKAB2	ENSG00000131791	protein_coding	-	-	-	-	-	-	-	rs4950384	4766	-1	Ensembl	-	-	-	-	-	0.1791	0.0953	0.2061	0.1349	0.2386	0.2577	-	-	-	-
8	previously not reported	GJA5	1:146598683:A:G	1	146598683	G	A	1:146649084:A:C	rs2883434	1	146649084	A	C	0.900129	upstream_gene_variant	MODIFIER	PRKAB2	ENSG00000131791	protein_coding	-	-	-	-	-	-	-	rs2883434	4961	-1	Ensembl	-	-	-	-	-	0.3011	0.379	0.2464	0.3234	0.2455	0.2689	-	-	-	-
8	previously not reported	GJA5	1:146598683:A:G	1	146598683	G	A	1:146652460:G:T	rs72708536	1	146652460	T	G	0.830452	intron_variant,non_coding_transcript_variant	MODIFIER	RP11-337C18.8	ENSG00000237188	antisense	-	2/3	-	-	-	-	-	rs72708536	-	1	Ensembl	-	-	-	-	-	0.1719	0.0908	0.1974	0.125	0.2336	0.2485	-	-	-	-
8	previously not reported	GJA5	1:146598683:A:G	1	146598683	G	A	1:146654805:C:T	rs17159914	1	146654805	T	C	0.900129	downstream_gene_variant	MODIFIER	FMO5	ENSG00000131781	protein_coding	-	-	-	-	-	-	-	rs17159914	3033	-1	Ensembl	-	-	-	-	-	0.3035	0.3873	0.2478	0.3234	0.2455	0.2689	-	-	-	-
8	previously not reported	GJA5	1:146598683:A:G	1	146598683	G	A	1:146655026:A:G	rs56080828	1	146655026	G	A	0.927697	downstream_gene_variant	MODIFIER	FMO5	ENSG00000131781	protein_coding	-	-	-	-	-	-	-	rs56080828	2812	-1	Ensembl	-	-	-	-	-	0.1544	0.0068	0.1974	0.1349	0.2376	0.2577	-	-	-	-
8	previously not reported	GJA5	1:146598683:A:G	1	146598683	G	A	1:146656754:D:I	rs11336263	1	146656754	I	A	0.900129	downstream_gene_variant	MODIFIER	FMO5	ENSG00000131781	protein_coding	-	-	-	-	-	-	-	rs11336263	1083	-1	Ensembl	-	-	-	-	-	0.3035	0.3873	0.2478	0.3234	0.2455	0.2689	-	-	-	-
8	previously not reported	GJA5	1:146598683:A:G	1	146598683	G	A	1:146658041:D:I	rs11387382	1	146658041	D	I	0.922533	3_prime_UTR_variant	MODIFIER	FMO5	ENSG00000131781	protein_coding	9/9	-	2428-2429	-	-	-	-	rs11387382	-	-1	Ensembl	-	-	-	-	-	0.1548	0.0083	0.196	0.1349	0.2366	0.2597	-	-	-	-
8	previously not reported	GJA5	1:146598683:A:G	1	146598683	G	A	1:146661337:G:T	rs12046706	1	146661337	G	T	0.900129	intron_variant	MODIFIER	FMO5	ENSG00000131781	protein_coding	-	8/8	-	-	-	-	-	rs12046706	-	-1	Ensembl	-	-	-	-	-	-	-	-	-	-	-	-	-	-	-
8	previously not reported	GJA5	1:146598683:A:G	1	146598683	G	A	1:146663114:D:I	rs376907843	1	146663114	I	G	0.932894	intron_variant	MODIFIER	FMO5	ENSG00000131781	protein_coding	-	7/8	-	-	-	-	-	rs376907843	-	-1	Ensembl	-	-	-	-	-	0.1785	0.0938	0.2061	0.1349	0.2386	0.2566	-	-	-	-
8	previously not reported	GJA5	1:146598683:A:G	1	146598683	G	A	1:146666510:A:G	rs149166812	1	146666510	G	A	0.922048	intron_variant	MODIFIER	FMO5	ENSG00000131781	protein_coding	-	7/8	-	-	-	-	-	rs149166812	-	-1	Ensembl	-	-	-	-	-	0.1544	0.0068	0.1974	0.1349	0.2366	0.2587	-	-	-	-
8	previously not reported	GJA5	1:146598683:A:G	1	146598683	G	A	1:146670819:D:I	rs76315499	1	146670819	I	A	0.927697	intron_variant	MODIFIER	FMO5	ENSG00000131781	protein_coding	-	7/8	-	-	-	-	-	rs76315499	-	-1	Ensembl	-	-	-	-	-	0.1649	0.0469	0.2003	0.1349	0.2376	0.2556	-	-	-	-
8	previously not reported	GJA5	1:146598683:A:G	1	146598683	G	A	1:146671044:A:G	rs17159924	1	146671044	A	G	0.932894	intron_variant	MODIFIER	FMO5	ENSG00000131781	protein_coding	-	7/8	-	-	-	-	-	rs17159924	-	-1	Ensembl	-	-	-	-	-	0.1789	0.0953	0.2061	0.1349	0.2386	0.2566	-	-	-	-
8	previously not reported	GJA5	1:146598683:A:G	1	146598683	G	A	1:146673507:A:C	rs28381210	1	146673507	C	A	0.927697	intron_variant	MODIFIER	FMO5	ENSG00000131781	protein_coding	-	6/8	-	-	-	-	-	rs28381210	-	-1	Ensembl	-	-	-	-	-	0.1653	0.0469	0.2003	0.1349	0.2376	0.2577	-	-	-	-
8	previously not reported	GJA5	1:146598683:A:G	1	146598683	G	A	1:146686228:C:T	rs3766520	1	146686228	C	T	0.927697	intron_variant	MODIFIER	FMO5	ENSG00000131781	protein_coding	-	3/8	-	-	-	-	-	rs3766520	-	-1	Ensembl	-	-	-	-	-	0.1546	0.0068	0.1974	0.1349	0.2376	0.2587	-	-	-	-
8	previously not reported	GJA5	1:146598683:A:G	1	146598683	G	A	1:146686372:C:T	rs3766519	1	146686372	C	T	0.92272	intron_variant	MODIFIER	FMO5	ENSG00000131781	protein_coding	-	3/8	-	-	-	-	-	rs3766519	-	-1	Ensembl	-	-	-	-	-	0.1558	0.0113	0.1974	0.1349	0.2386	0.2577	-	-	-	-
8	previously not reported	GJA5	1:146598683:A:G	1	146598683	G	A	1:146688941:C:T	rs1932977	1	146688941	T	C	0.883511	intron_variant	MODIFIER	FMO5	ENSG00000131781	protein_coding	-	2/8	-	-	-	-	-	rs1932977	-	-1	Ensembl	-	-	-	-	-	0.2806	0.3026	0.2406	0.3234	0.2475	0.2689	-	-	-	-
8	previously not reported	GJA5	1:146598683:A:G	1	146598683	G	A	1:146704809:A:C	rs4950389	1	146704809	C	A	0.9123	intron_variant,non_coding_transcript_variant	MODIFIER	RP11-337C18.10	ENSG00000273071	processed_transcript	-	2/2	-	-	-	-	-	rs4950389	-	1	Ensembl	-	-	-	-	-	0.1623	0.0477	0.1974	0.125	0.2346	0.2566	-	-	-	-
8	previously not reported	GJA5	1:146598683:A:G	1	146598683	G	A	1:146705892:C:T	rs4593887	1	146705892	T	C	0.9123	intron_variant,non_coding_transcript_variant	MODIFIER	RP11-337C18.10	ENSG00000273071	processed_transcript	-	2/2	-	-	-	-	-	rs4593887	-	1	Ensembl	-	-	-	-	-	0.1783	0.1067	0.2003	0.125	0.2346	0.2566	-	-	-	-
8	previously not reported	GJA5	1:146598683:A:G	1	146598683	G	A	1:146705955:A:G	rs72691004	1	146705955	G	A	0.907307	intron_variant,non_coding_transcript_variant	MODIFIER	RP11-337C18.10	ENSG00000273071	processed_transcript	-	2/2	-	-	-	-	-	rs72691004	-	1	Ensembl	-	-	-	-	-	0.1785	0.1067	0.2003	0.125	0.2356	0.2566	-	-	-	-
8	previously not reported	GJA5	1:146598683:A:G	1	146598683	G	A	1:146707223:G:T	rs79810882	1	146707223	G	T	0.907307	intron_variant,non_coding_transcript_variant	MODIFIER	RP11-337C18.10	ENSG00000273071	processed_transcript	-	2/2	-	-	-	-	-	rs79810882	-	1	Ensembl	-	-	-	-	-	0.1514	0.0076	0.1945	0.124	0.2356	0.2566	-	-	-	-
8	previously not reported	GJA5	1:146598683:A:G	1	146598683	G	A	1:146711400:C:G	rs72691012	1	146711400	G	C	0.894686	upstream_gene_variant	MODIFIER	CHD1L	ENSG00000131778	protein_coding	-	-	-	-	-	-	-	rs72691012	2934	1	Ensembl	-	-	-	-	-	0.1661	0.0575	0.1974	0.125	0.2386	0.2587	-	-	-	-
8	previously not reported	GJA5	1:146598683:A:G	1	146598683	G	A	1:146712455:A:C	rs4950313	1	146712455	A	C	0.894686	upstream_gene_variant	MODIFIER	CHD1L	ENSG00000131778	protein_coding	-	-	-	-	-	-	-	rs4950313	1879	1	Ensembl	-	-	-	-	-	0.1635	0.0477	0.1974	0.125	0.2386	0.2587	-	-	-	-
8	previously not reported	GJA5	1:146598683:A:G	1	146598683	G	A	1:146717027:C:T	rs72691016	1	146717027	T	C	0.851877	intron_variant	MODIFIER	CHD1L	ENSG00000131778	protein_coding	-	1/22	-	-	-	-	-	rs72691016	-	1	Ensembl	-	-	-	-	-	0.1825	0.1278	0.1988	0.125	0.2306	0.2546	-	-	-	-
8	previously not reported	GJA5	1:146598683:A:G	1	146598683	G	A	1:146717699:C:T	rs11239954	1	146717699	C	T	0.837482	intron_variant	MODIFIER	CHD1L	ENSG00000131778	protein_coding	-	1/22	-	-	-	-	-	rs11239954	-	1	Ensembl	-	-	-	-	-	0.1861	0.1324	0.2032	0.125	0.2376	0.2566	-	-	-	-
8	previously not reported	GJA5	1:146598683:A:G	1	146598683	G	A	1:146717973:C:T	rs76327075	1	146717973	C	T	0.837482	intron_variant	MODIFIER	CHD1L	ENSG00000131778	protein_coding	-	1/22	-	-	-	-	-	rs76327075	-	1	Ensembl	-	-	-	-	-	0.1851	0.1286	0.2032	0.125	0.2376	0.2566	-	-	-	-
8	previously not reported	GJA5	1:146598683:A:G	1	146598683	G	A	1:146719108:A:G	rs11239958	1	146719108	G	A	0.837482	intron_variant	MODIFIER	CHD1L	ENSG00000131778	protein_coding	-	1/22	-	-	-	-	-	rs11239958	-	1	Ensembl	-	-	-	-	-	0.1851	0.1286	0.2032	0.125	0.2376	0.2566	-	-	-	-
8	previously not reported	GJA5	1:146598683:A:G	1	146598683	G	A	1:146720934:C:T	rs12060046	1	146720934	T	C	0.837482	intron_variant	MODIFIER	CHD1L	ENSG00000131778	protein_coding	-	1/22	-	-	-	-	-	rs12060046	-	1	Ensembl	-	-	-	-	-	0.1851	0.1286	0.2032	0.125	0.2376	0.2566	-	-	-	-
8	previously not reported	GJA5	1:146598683:A:G	1	146598683	G	A	1:146725993:D:I	rs138772931	1	146725993	I	C	0.851877	intron_variant	MODIFIER	CHD1L	ENSG00000131778	protein_coding	-	2/22	-	-	-	-	-	rs138772931	-	1	Ensembl	-	-	-	-	-	0.1472	0.0076	0.1931	0.1111	0.2306	0.2546	-	-	-	-
8	previously not reported	GJA5	1:146598683:A:G	1	146598683	G	A	1:146727110:A:G	rs72691025	1	146727110	G	A	0.837482	intron_variant	MODIFIER	CHD1L	ENSG00000131778	protein_coding	-	3/22	-	-	-	-	-	rs72691025	-	1	Ensembl	-	-	-	-	-	0.1823	0.1286	0.2032	0.1111	0.2376	0.2566	-	-	-	-
8	previously not reported	GJA5	1:146598683:A:G	1	146598683	G	A	1:146727213:C:T	rs17160050	1	146727213	T	C	0.837482	intron_variant	MODIFIER	CHD1L	ENSG00000131778	protein_coding	-	3/22	-	-	-	-	-	rs17160050	-	1	Ensembl	-	-	-	-	-	0.1829	0.1301	0.2046	0.1111	0.2376	0.2566	-	-	-	-
8	previously not reported	GJA5	1:146598683:A:G	1	146598683	G	A	1:146727388:G:T	rs17160051	1	146727388	G	T	0.842178	intron_variant	MODIFIER	CHD1L	ENSG00000131778	protein_coding	-	3/22	-	-	-	-	-	rs17160051	-	1	Ensembl	-	-	-	-	-	0.1793	0.1278	0.1988	0.1111	0.2286	0.2546	-	-	-	-
8	previously not reported	GJA5	1:146598683:A:G	1	146598683	G	A	1:146732707:A:G	rs11800580	1	146732707	G	A	0.847013	intron_variant	MODIFIER	CHD1L	ENSG00000131778	protein_coding	-	6/22	-	-	-	-	-	rs11800580	-	1	Ensembl	-	-	-	-	-	0.1803	0.1301	0.1988	0.1111	0.2296	0.2556	-	-	-	-
8	previously not reported	GJA5	1:146598683:A:G	1	146598683	G	A	1:146732774:A:G	rs72691032	1	146732774	G	A	0.847013	intron_variant	MODIFIER	CHD1L	ENSG00000131778	protein_coding	-	6/22	-	-	-	-	-	rs72691032	-	1	Ensembl	-	-	-	-	-	0.147	0.0076	0.1931	0.1111	0.2296	0.2546	-	-	-	-
8	previously not reported	GJA5	1:146598683:A:G	1	146598683	G	A	1:146732921:C:T	rs72691033	1	146732921	C	T	0.847013	intron_variant	MODIFIER	CHD1L	ENSG00000131778	protein_coding	-	6/22	-	-	-	-	-	rs72691033	-	1	Ensembl	-	-	-	-	-	0.147	0.0076	0.1931	0.1111	0.2296	0.2546	-	-	-	-
8	previously not reported	GJA5	1:146598683:A:G	1	146598683	G	A	1:146733077:A:G	rs111370771	1	146733077	A	G	0.847013	intron_variant	MODIFIER	CHD1L	ENSG00000131778	protein_coding	-	6/22	-	-	-	-	-	rs111370771	-	1	Ensembl	-	-	-	-	-	0.147	0.0076	0.1931	0.1111	0.2296	0.2546	-	-	-	-
8	previously not reported	GJA5	1:146598683:A:G	1	146598683	G	A	1:146733564:C:T	rs4301678	1	146733564	C	T	0.847013	intron_variant	MODIFIER	CHD1L	ENSG00000131778	protein_coding	-	6/22	-	-	-	-	-	rs4301678	-	1	Ensembl	-	-	-	-	-	0.1472	0.0076	0.1931	0.1111	0.2296	0.2556	-	-	-	-
8	previously not reported	GJA5	1:146598683:A:G	1	146598683	G	A	1:146734369:D:I	rs149197214	1	146734369	I	C	0.847013	intron_variant	MODIFIER	CHD1L	ENSG00000131778	protein_coding	-	6/22	-	-	-	-	-	rs149197214	-	1	Ensembl	-	-	-	-	-	0.1466	0.0076	0.1931	0.1111	0.2296	0.2526	-	-	-	-
8	previously not reported	GJA5	1:146598683:A:G	1	146598683	G	A	1:146734601:A:T	rs17356184	1	146734601	A	T	0.847013	intron_variant	MODIFIER	CHD1L	ENSG00000131778	protein_coding	-	6/22	-	-	-	-	-	rs17356184	-	1	Ensembl	-	-	-	-	-	0.147	0.0076	0.1931	0.1111	0.2296	0.2546	-	-	-	-
8	previously not reported	GJA5	1:146598683:A:G	1	146598683	G	A	1:146734978:C:G	rs80270233	1	146734978	C	G	0.842092	intron_variant	MODIFIER	CHD1L	ENSG00000131778	protein_coding	-	6/22	-	-	-	-	-	rs80270233	-	1	Ensembl	-	-	-	-	-	0.1472	0.0076	0.1931	0.1111	0.2306	0.2546	-	-	-	-
8	previously not reported	GJA5	1:146598683:A:G	1	146598683	G	A	1:146736092:C:T	rs4950315	1	146736092	C	T	0.842092	synonymous_variant	LOW	CHD1L	ENSG00000131778	protein_coding	7/23	-	608	588	196	V	gtC/gtT	rs4950315	-	1	Ensembl	-	-	-	-	-	0.1472	0.0076	0.1931	0.1111	0.2306	0.2546	-	-	-	-
8	previously not reported	GJA5	1:146598683:A:G	1	146598683	G	A	1:146736548:G:T	rs4950392	1	146736548	G	T	0.847013	intron_variant	MODIFIER	CHD1L	ENSG00000131778	protein_coding	-	7/22	-	-	-	-	-	rs4950392	-	1	Ensembl	-	-	-	-	-	0.147	0.0076	0.1931	0.1111	0.2296	0.2546	-	-	1	-
8	previously not reported	GJA5	1:146598683:A:G	1	146598683	G	A	1:146737343:A:C	rs17356219	1	146737343	A	C	0.842092	intron_variant	MODIFIER	CHD1L	ENSG00000131778	protein_coding	-	7/22	-	-	-	-	-	rs17356219	-	1	Ensembl	-	-	-	-	-	0.1472	0.0076	0.1931	0.1111	0.2306	0.2546	-	-	-	-
8	previously not reported	GJA5	1:146598683:A:G	1	146598683	G	A	1:146738743:A:G	rs72691041	1	146738743	G	A	0.847013	intron_variant	MODIFIER	CHD1L	ENSG00000131778	protein_coding	-	8/22	-	-	-	-	-	rs72691041	-	1	Ensembl	-	-	-	-	-	0.1474	0.0083	0.1931	0.1111	0.2296	0.2556	-	-	-	-
8	previously not reported	GJA5	1:146598683:A:G	1	146598683	G	A	1:146740502:C:G	rs17356233	1	146740502	C	G	0.842092	missense_variant	MODERATE	CHD1L	ENSG00000131778	protein_coding	10/23	-	1070	1050	350	H/Q	caC/caA	rs17356233,CM067658,COSM5413695,COSM5413696	-	1	Ensembl	tolerated(0.29)	benign(0.082)	neutral(0.035)	-	-	-	-	-	-	-	-	-	0,0,1,1	0,1,1,1	-
8	previously not reported	GJA5	1:146598683:A:G	1	146598683	G	A	1:146741537:G:T	rs17356240	1	146741537	G	T	0.847013	intron_variant	MODIFIER	CHD1L	ENSG00000131778	protein_coding	-	10/22	-	-	-	-	-	rs17356240	-	1	Ensembl	-	-	-	-	-	0.147	0.0076	0.1931	0.1111	0.2296	0.2546	-	-	-	-
8	previously not reported	GJA5	1:146598683:A:G	1	146598683	G	A	1:146741989:C:T	rs1999820	1	146741989	C	T	0.847013	intron_variant	MODIFIER	CHD1L	ENSG00000131778	protein_coding	-	10/22	-	-	-	-	-	rs1999820	-	1	Ensembl	-	-	-	-	-	0.1472	0.0083	0.1931	0.1111	0.2296	0.2546	-	-	-	-
8	previously not reported	GJA5	1:146598683:A:G	1	146598683	G	A	1:146742918:D:I	rs3737855	1	146742918	D	I	0.844309	intron_variant	MODIFIER	CHD1L	ENSG00000131778	protein_coding	-	11/22	-	-	-	-	-	rs3737855	-	1	Ensembl	-	-	-	-	-	0.1474	0.0083	0.1931	0.1111	0.2296	0.2556	-	-	-	-
8	previously not reported	GJA5	1:146598683:A:G	1	146598683	G	A	1:146745375:G:T	rs4950316	1	146745375	G	T	0.847013	intron_variant	MODIFIER	CHD1L	ENSG00000131778	protein_coding	-	12/22	-	-	-	-	-	rs4950316	-	1	Ensembl	-	-	-	-	-	0.147	0.0076	0.1931	0.1111	0.2296	0.2546	-	-	-	-
8	previously not reported	GJA5	1:146598683:A:G	1	146598683	G	A	1:146749181:C:T	rs2354428	1	146749181	T	C	0.842092	intron_variant	MODIFIER	CHD1L	ENSG00000131778	protein_coding	-	14/22	-	-	-	-	-	rs2354428	-	1	Ensembl	-	-	-	-	-	0.1472	0.0076	0.1931	0.1111	0.2306	0.2546	-	-	-	-
8	previously not reported	GJA5	1:146598683:A:G	1	146598683	G	A	1:146749611:C:T	rs72691054	1	146749611	T	C	0.842092	intron_variant	MODIFIER	CHD1L	ENSG00000131778	protein_coding	-	14/22	-	-	-	-	-	rs72691054	-	1	Ensembl	-	-	-	-	-	0.1474	0.0076	0.1945	0.1111	0.2306	0.2546	-	-	-	-
8	previously not reported	GJA5	1:146598683:A:G	1	146598683	G	A	1:146751410:A:C	rs17360443	1	146751410	C	A	0.847013	intron_variant	MODIFIER	CHD1L	ENSG00000131778	protein_coding	-	14/22	-	-	-	-	-	rs17360443	-	1	Ensembl	-	-	-	-	-	0.1472	0.0076	0.1931	0.1111	0.2296	0.2556	-	-	-	-
8	previously not reported	GJA5	1:146598683:A:G	1	146598683	G	A	1:146753478:A:T	rs114823926	1	146753478	A	T	0.842092	intron_variant	MODIFIER	CHD1L	ENSG00000131778	protein_coding	-	15/22	-	-	-	-	-	rs114823926	-	1	Ensembl	-	-	-	-	-	0.1474	0.0083	0.1931	0.1121	0.2306	0.2536	-	-	-	-
8	previously not reported	GJA5	1:146598683:A:G	1	146598683	G	A	1:146758285:D:I	rs147488881	1	146758285	I	T	0.803788	intron_variant	MODIFIER	CHD1L	ENSG00000131778	protein_coding	-	18/22	-	-	-	-	-	rs147488881	-	1	Ensembl	-	-	-	-	-	0.1416	0.0083	0.1931	0.0665	0.2396	0.2618	-	-	-	-
8	previously not reported	GJA5	1:146598683:A:G	1	146598683	G	A	1:146759306:C:T	rs6703892	1	146759306	T	C	0.832363	splice_region_variant,intron_variant	LOW	CHD1L	ENSG00000131778	protein_coding	-	18/22	-	-	-	-	-	rs6703892	-	1	Ensembl	-	-	-	3.24722844673697E-5	0.0	0.1476	0.0083	0.1931	0.1121	0.2306	0.2546	-	-	-	-
8	previously not reported	GJA5	1:146598683:A:G	1	146598683	G	A	1:146760908:D:I	rs144374887	1	146760908	D	I	0.837205	intron_variant	MODIFIER	CHD1L	ENSG00000131778	protein_coding	-	19/22	-	-	-	-	-	rs144374887	-	1	Ensembl	-	-	-	-	-	0.144	0.0083	0.1931	0.0933	0.2316	0.2546	-	-	-	-
8	previously not reported	GJA5	1:146598683:A:G	1	146598683	G	A	1:146761044:C:T	rs7554833	1	146761044	C	T	0.837205	intron_variant	MODIFIER	CHD1L	ENSG00000131778	protein_coding	-	19/22	-	-	-	-	-	rs7554833	-	1	Ensembl	-	-	-	-	-	-	-	-	-	-	-	-	-	-	-
8	previously not reported	GJA5	1:146598683:A:G	1	146598683	G	A	1:146764675:D:I	rs150304546	1	146764675	I	A	0.837205	intron_variant	MODIFIER	CHD1L	ENSG00000131778	protein_coding	-	20/22	-	-	-	-	-	rs150304546	-	1	Ensembl	-	-	-	-	-	0.1438	0.0083	0.1931	0.0923	0.2316	0.2546	-	-	-	-
8	previously not reported	GJA5	1:146598683:A:G	1	146598683	G	A	1:146765945:D:I	rs145661481	1	146765945	I	T	0.837205	intron_variant	MODIFIER	CHD1L	ENSG00000131778	protein_coding	-	21/22	-	-	-	-	-	rs145661481	-	1	Ensembl	-	-	-	-	-	0.1438	0.0083	0.1931	0.0923	0.2316	0.2546	-	-	-	-
8	previously not reported	GJA5	1:146598683:A:G	1	146598683	G	A	1:146767770:C:T	rs17356492	1	146767770	T	C	0.837205	downstream_gene_variant	MODIFIER	CHD1L	ENSG00000131778	protein_coding	-	-	-	-	-	-	-	rs17356492	327	1	Ensembl	-	-	-	-	-	0.144	0.0083	0.1931	0.0933	0.2316	0.2546	-	-	-	-
8	previously not reported	GJA5	1:146598683:A:G	1	146598683	G	A	1:146769253:D:I	rs142558415	1	146769253	I	C	0.837205	downstream_gene_variant	MODIFIER	CHD1L	ENSG00000131778	protein_coding	-	-	-	-	-	-	-	rs142558415	1811	1	Ensembl	-	-	-	-	-	0.1434	0.0076	0.1931	0.0923	0.2316	0.2536	-	-	-	-
8	previously not reported	GJA5	1:146598683:A:G	1	146598683	G	A	1:146769569:C:T	rs72691090	1	146769569	T	C	0.823706	downstream_gene_variant	MODIFIER	CHD1L	ENSG00000131778	protein_coding	-	-	-	-	-	-	-	rs72691090	2126	1	Ensembl	-	-	-	-	-	0.15	0.0083	0.1945	0.0923	0.2346	0.2822	-	-	-	-
8	previously not reported	GJA5	1:146598683:A:G	1	146598683	G	A	1:146769662:C:T	rs72691093	1	146769662	C	T	0.837205	downstream_gene_variant	MODIFIER	CHD1L	ENSG00000131778	protein_coding	-	-	-	-	-	-	-	rs72691093	2219	1	Ensembl	-	-	-	-	-	0.1438	0.0083	0.1931	0.0923	0.2316	0.2546	-	-	-	-
8	previously not reported	GJA5	1:146598683:A:G	1	146598683	G	A	1:146769674:A:G	rs76236344	1	146769674	G	A	0.837205	downstream_gene_variant	MODIFIER	CHD1L	ENSG00000131778	protein_coding	-	-	-	-	-	-	-	rs76236344	2231	1	Ensembl	-	-	-	-	-	0.1438	0.0083	0.1931	0.0923	0.2316	0.2546	-	-	-	-
8	previously not reported	GJA5	1:146598683:A:G	1	146598683	G	A	1:146769990:C:G	rs72691095	1	146769990	G	C	0.837205	downstream_gene_variant	MODIFIER	CHD1L	ENSG00000131778	protein_coding	-	-	-	-	-	-	-	rs72691095	2547	1	Ensembl	-	-	-	-	-	0.1438	0.0083	0.1931	0.0923	0.2316	0.2546	-	-	-	-
8	previously not reported	GJA5	1:146598683:A:G	1	146598683	G	A	1:146771151:C:T	rs111312605	1	146771151	C	T	0.837205	downstream_gene_variant	MODIFIER	CHD1L	ENSG00000131778	protein_coding	-	-	-	-	-	-	-	rs111312605	3708	1	Ensembl	-	-	-	-	-	0.144	0.0091	0.1931	0.0923	0.2316	0.2546	-	-	-	-
8	previously not reported	GJA5	1:146598683:A:G	1	146598683	G	A	1:146771388:C:T	rs72691097	1	146771388	C	T	0.837205	downstream_gene_variant	MODIFIER	CHD1L	ENSG00000131778	protein_coding	-	-	-	-	-	-	-	rs72691097	3945	1	Ensembl	-	-	-	-	-	0.144	0.0091	0.1931	0.0923	0.2316	0.2546	-	-	-	-
8	previously not reported	GJA5	1:146598683:A:G	1	146598683	G	A	1:146771767:C:G	rs67902816	1	146771767	C	G	0.837205	downstream_gene_variant	MODIFIER	CHD1L	ENSG00000131778	protein_coding	-	-	-	-	-	-	-	rs67902816	4324	1	Ensembl	-	-	-	-	-	0.1436	0.0076	0.1931	0.0923	0.2316	0.2546	-	-	-	-
8	previously not reported	GJA5	1:146598683:A:G	1	146598683	G	A	1:146771840:A:G	rs72691098	1	146771840	G	A	0.837205	downstream_gene_variant	MODIFIER	CHD1L	ENSG00000131778	protein_coding	-	-	-	-	-	-	-	rs72691098	4397	1	Ensembl	-	-	-	-	-	0.1438	0.0083	0.1931	0.0923	0.2316	0.2546	-	-	-	-
8	previously not reported	GJA5	1:146598683:A:G	1	146598683	G	A	1:146772888:A:T	rs72691102	1	146772888	A	T	0.837205	intergenic_variant	MODIFIER	-	-	-	-	-	-	-	-	-	-	rs72691102	-	-	-	-	-	-	-	-	0.1438	0.0083	0.1931	0.0923	0.2316	0.2546	-	-	-	-
8	previously not reported	GJA5	1:146598683:A:G	1	146598683	G	A	1:146773136:A:T	rs72692904	1	146773136	T	A	0.837205	intergenic_variant	MODIFIER	-	-	-	-	-	-	-	-	-	-	rs72692904	-	-	-	-	-	-	-	-	0.1438	0.0083	0.1931	0.0923	0.2316	0.2546	-	-	-	-
8	previously not reported	GJA5	1:146598683:A:G	1	146598683	G	A	1:146773253:C:T	rs72692905	1	146773253	C	T	0.837205	intergenic_variant	MODIFIER	-	-	-	-	-	-	-	-	-	-	rs72692905	-	-	-	-	-	-	-	-	0.1438	0.0083	0.1931	0.0923	0.2316	0.2546	-	-	-	-
8	previously not reported	GJA5	1:146598683:A:G	1	146598683	G	A	1:146773610:A:G	rs72692907	1	146773610	A	G	0.837205	intergenic_variant	MODIFIER	-	-	-	-	-	-	-	-	-	-	rs72692907	-	-	-	-	-	-	-	-	0.1438	0.0083	0.1931	0.0923	0.2316	0.2546	-	-	-	-
8	previously not reported	GJA5	1:146598683:A:G	1	146598683	G	A	1:146774637:A:T	rs72692914	1	146774637	T	A	0.837205	intergenic_variant	MODIFIER	-	-	-	-	-	-	-	-	-	-	rs72692914	-	-	-	-	-	-	-	-	0.1438	0.0083	0.1931	0.0923	0.2316	0.2546	-	-	-	-
8	previously not reported	GJA5	1:146598683:A:G	1	146598683	G	A	1:146775112:D:I	rs78434328	1	146775112	I	G	0.837205	intergenic_variant	MODIFIER	-	-	-	-	-	-	-	-	-	-	rs78434328	-	-	-	-	-	-	-	-	0.1436	0.0083	0.1931	0.0923	0.2316	0.2536	-	-	-	-
8	previously not reported	GJA5	1:146598683:A:G	1	146598683	G	A	1:146775726:D:I	rs150871452	1	146775726	I	C	0.832363	intergenic_variant	MODIFIER	-	-	-	-	-	-	-	-	-	-	rs150871452	-	-	-	-	-	-	-	-	0.1432	0.0083	0.1931	0.0923	0.2306	0.2526	-	-	-	-
8	previously not reported	GJA5	1:146598683:A:G	1	146598683	G	A	1:146776087:A:T	rs72692917	1	146776087	A	T	0.837205	intergenic_variant	MODIFIER	-	-	-	-	-	-	-	-	-	-	rs72692917	-	-	-	-	-	-	-	-	0.1438	0.0083	0.1931	0.0923	0.2316	0.2546	-	-	-	-
8	previously not reported	GJA5	1:146598683:A:G	1	146598683	G	A	1:146778296:A:G	rs4950395	1	146778296	G	A	0.827532	intergenic_variant	MODIFIER	-	-	-	-	-	-	-	-	-	-	rs4950395	-	-	-	-	-	-	-	-	0.1442	0.0083	0.1931	0.0933	0.2336	0.2536	-	-	-	-
8	previously not reported	GJA5	1:146598683:A:G	1	146598683	G	A	1:146778434:C:T	rs4950396	1	146778434	C	T	0.832351	intergenic_variant	MODIFIER	-	-	-	-	-	-	-	-	-	-	rs4950396	-	-	-	-	-	-	-	-	0.1438	0.0083	0.1931	0.0913	0.2326	0.2546	-	-	-	-
8	previously not reported	GJA5	1:146598683:A:G	1	146598683	G	A	1:146780214:C:T	rs72692920	1	146780214	C	T	0.832351	intergenic_variant	MODIFIER	-	-	-	-	-	-	-	-	-	-	rs72692920	-	-	-	-	-	-	-	-	0.1434	0.0083	0.1888	0.0923	0.2326	0.2546	-	-	-	-
8	previously not reported	GJA5	1:146598683:A:G	1	146598683	G	A	1:146780541:G:T	rs66580541	1	146780541	T	G	0.832351	intergenic_variant	MODIFIER	-	-	-	-	-	-	-	-	-	-	rs66580541	-	-	-	-	-	-	-	-	0.144	0.0083	0.1931	0.0923	0.2326	0.2546	-	-	-	-
8	previously not reported	GJA5	1:146598683:A:G	1	146598683	G	A	1:146781833:A:C	rs4950397	1	146781833	A	C	0.827506	intergenic_variant	MODIFIER	-	-	-	-	-	-	-	-	-	-	rs1040254333,rs4950397	-	-	-	-	-	-	-	-	0.143	0.0083	0.1902	0.0923	0.2316	0.2526	-	-	-	-
8	previously not reported	GJA5	1:146598683:A:G	1	146598683	G	A	1:146782112:C:T	rs4950317	1	146782112	C	T	0.837227	intergenic_variant	MODIFIER	-	-	-	-	-	-	-	-	-	-	rs4950317	-	-	-	-	-	-	-	-	0.1444	0.0091	0.1931	0.0923	0.2336	0.2546	-	-	-	-
8	previously not reported	GJA5	1:146598683:A:G	1	146598683	G	A	1:146783093:A:G	rs76236778	1	146783093	G	A	0.832351	intergenic_variant	MODIFIER	-	-	-	-	-	-	-	-	-	-	rs76236778	-	-	-	-	-	-	-	-	0.1442	0.0083	0.1931	0.0923	0.2326	0.2556	-	-	-	-
8	previously not reported	GJA5	1:146598683:A:G	1	146598683	G	A	1:146783968:A:T	rs56002710	1	146783968	T	A	0.832351	intergenic_variant	MODIFIER	-	-	-	-	-	-	-	-	-	-	rs56002710	-	-	-	-	-	-	-	-	0.144	0.0083	0.1931	0.0923	0.2326	0.2546	-	-	-	-
8	previously not reported	GJA5	1:146598683:A:G	1	146598683	G	A	1:146785157:A:G	rs945742	1	146785157	A	G	0.832351	intergenic_variant	MODIFIER	-	-	-	-	-	-	-	-	-	-	rs945742	-	-	-	-	-	-	-	-	0.144	0.0083	0.1931	0.0923	0.2326	0.2546	-	-	1	-
8	previously not reported	GJA5	1:146598683:A:G	1	146598683	G	A	1:146787953:A:G	rs4950318	1	146787953	A	G	0.832351	upstream_gene_variant	MODIFIER	RP11-337C18.4	ENSG00000213226	processed_pseudogene	-	-	-	-	-	-	-	rs4950318	2875	1	Ensembl	-	-	-	-	-	0.144	0.0083	0.1931	0.0923	0.2326	0.2546	-	-	-	-
8	previously not reported	GJA5	1:146598683:A:G	1	146598683	G	A	1:146787963:C:T	rs4950319	1	146787963	T	C	0.832351	upstream_gene_variant	MODIFIER	RP11-337C18.4	ENSG00000213226	processed_pseudogene	-	-	-	-	-	-	-	rs4950319	2865	1	Ensembl	-	-	-	-	-	0.1442	0.0091	0.1931	0.0923	0.2326	0.2546	-	-	-	-
8	previously not reported	GJA5	1:146598683:A:G	1	146598683	G	A	1:146788287:A:G	rs4453096	1	146788287	A	G	0.832351	upstream_gene_variant	MODIFIER	RP11-337C18.4	ENSG00000213226	processed_pseudogene	-	-	-	-	-	-	-	rs4453096	2541	1	Ensembl	-	-	-	-	-	0.144	0.0083	0.1931	0.0923	0.2326	0.2546	-	-	-	-
8	previously not reported	GJA5	1:146598683:A:G	1	146598683	G	A	1:146788460:C:G	rs4373796	1	146788460	C	G	0.832351	upstream_gene_variant	MODIFIER	RP11-337C18.4	ENSG00000213226	processed_pseudogene	-	-	-	-	-	-	-	rs4373796	2368	1	Ensembl	-	-	-	-	-	0.1434	0.0083	0.1888	0.0923	0.2326	0.2546	-	-	-	-
8	previously not reported	GJA5	1:146598683:A:G	1	146598683	G	A	1:146788598:G:T	rs4568882	1	146788598	T	G	0.832351	upstream_gene_variant	MODIFIER	RP11-337C18.4	ENSG00000213226	processed_pseudogene	-	-	-	-	-	-	-	rs4568882	2230	1	Ensembl	-	-	-	-	-	0.1434	0.0083	0.1888	0.0923	0.2326	0.2546	-	-	-	-
8	previously not reported	GJA5	1:146598683:A:G	1	146598683	G	A	1:146788708:C:T	rs2883323	1	146788708	T	C	0.828469	upstream_gene_variant	MODIFIER	RP11-337C18.4	ENSG00000213226	processed_pseudogene	-	-	-	-	-	-	-	rs2883323	2120	1	Ensembl	-	-	-	-	-	0.1436	0.0083	0.1888	0.0923	0.2336	0.2546	-	-	-	-
8	previously not reported	GJA5	1:146598683:A:G	1	146598683	G	A	1:146788870:C:T	rs2883324	1	146788870	T	C	0.832351	upstream_gene_variant	MODIFIER	RP11-337C18.4	ENSG00000213226	processed_pseudogene	-	-	-	-	-	-	-	rs2883324	1958	1	Ensembl	-	-	-	-	-	0.1434	0.0083	0.1888	0.0923	0.2326	0.2546	-	-	-	-
8	previously not reported	GJA5	1:146598683:A:G	1	146598683	G	A	1:146789398:A:G	rs115931696	1	146789398	G	A	0.832351	upstream_gene_variant	MODIFIER	RP11-337C18.4	ENSG00000213226	processed_pseudogene	-	-	-	-	-	-	-	rs115931696	1430	1	Ensembl	-	-	-	-	-	0.1434	0.0083	0.1888	0.0923	0.2326	0.2546	-	-	-	-
8	previously not reported	GJA5	1:146598683:A:G	1	146598683	G	A	1:146789419:C:T	rs111235886	1	146789419	T	C	0.832351	upstream_gene_variant	MODIFIER	RP11-337C18.4	ENSG00000213226	processed_pseudogene	-	-	-	-	-	-	-	rs111235886	1409	1	Ensembl	-	-	-	-	-	0.1434	0.0083	0.1888	0.0923	0.2326	0.2546	-	-	-	-
8	previously not reported	GJA5	1:146598683:A:G	1	146598683	G	A	1:146789538:D:I	rs374261640	1	146789538	D	I	0.826608	upstream_gene_variant	MODIFIER	RP11-337C18.4	ENSG00000213226	processed_pseudogene	-	-	-	-	-	-	-	rs374261640	1289	1	Ensembl	-	-	-	-	-	0.1432	0.0083	0.1888	0.0923	0.2316	0.2546	-	-	-	-
8	previously not reported	GJA5	1:146598683:A:G	1	146598683	G	A	1:146789849:C:T	rs112643374	1	146789849	T	C	0.832351	upstream_gene_variant	MODIFIER	RP11-337C18.4	ENSG00000213226	processed_pseudogene	-	-	-	-	-	-	-	rs112643374	979	1	Ensembl	-	-	-	-	-	0.1434	0.0083	0.1888	0.0923	0.2326	0.2546	-	-	-	-
8	previously not reported	GJA5	1:146598683:A:G	1	146598683	G	A	1:146790018:C:T	rs111296483	1	146790018	C	T	0.832351	upstream_gene_variant	MODIFIER	RP11-337C18.4	ENSG00000213226	processed_pseudogene	-	-	-	-	-	-	-	rs111296483	810	1	Ensembl	-	-	-	-	-	-	-	-	-	-	-	-	-	-	-
8	previously not reported	GJA5	1:146598683:A:G	1	146598683	G	A	1:146790180:C:T	rs72692942	1	146790180	C	T	0.832351	upstream_gene_variant	MODIFIER	RP11-337C18.4	ENSG00000213226	processed_pseudogene	-	-	-	-	-	-	-	rs72692942	648	1	Ensembl	-	-	-	-	-	0.1434	0.0083	0.1888	0.0923	0.2326	0.2546	-	-	-	-
8	previously not reported	GJA5	1:146598683:A:G	1	146598683	G	A	1:146790598:A:G	rs113498894	1	146790598	G	A	0.832351	upstream_gene_variant	MODIFIER	RP11-337C18.4	ENSG00000213226	processed_pseudogene	-	-	-	-	-	-	-	rs113498894	230	1	Ensembl	-	-	-	-	-	0.1436	0.0083	0.1888	0.0923	0.2326	0.2556	-	-	-	-
8	previously not reported	GJA5	1:146598683:A:G	1	146598683	G	A	1:146791020:A:G	rs4950399	1	146791020	A	G	0.832351	non_coding_transcript_exon_variant	MODIFIER	RP11-337C18.4	ENSG00000213226	processed_pseudogene	1/2	-	193	-	-	-	-	rs4950399	-	1	Ensembl	-	-	-	-	-	0.1432	0.0076	0.1888	0.0923	0.2326	0.2546	-	-	-	-
8	previously not reported	GJA5	1:146598683:A:G	1	146598683	G	A	1:146791101:C:G	rs4950400	1	146791101	C	G	0.832351	non_coding_transcript_exon_variant	MODIFIER	RP11-337C18.4	ENSG00000213226	processed_pseudogene	1/2	-	274	-	-	-	-	rs4950400	-	1	Ensembl	-	-	-	-	-	0.1448	0.0136	0.1888	0.0923	0.2326	0.2546	-	-	-	-
8	previously not reported	GJA5	1:146598683:A:G	1	146598683	G	A	1:146791289:A:G	rs4950401	1	146791289	G	A	0.832351	non_coding_transcript_exon_variant	MODIFIER	RP11-337C18.4	ENSG00000213226	processed_pseudogene	1/2	-	462	-	-	-	-	rs4950401	-	1	Ensembl	-	-	-	-	-	0.1454	0.0136	0.1931	0.0923	0.2326	0.2546	-	-	-	-
8	previously not reported	GJA5	1:146598683:A:G	1	146598683	G	A	1:146791402:G:T	rs4950402	1	146791402	T	G	0.832351	non_coding_transcript_exon_variant	MODIFIER	RP11-337C18.4	ENSG00000213226	processed_pseudogene	1/2	-	575	-	-	-	-	rs4950402	-	1	Ensembl	-	-	-	-	-	-	-	-	-	-	-	-	-	-	-
8	previously not reported	GJA5	1:146598683:A:G	1	146598683	G	A	1:146791441:C:T	rs4950403	1	146791441	T	C	0.832351	non_coding_transcript_exon_variant	MODIFIER	RP11-337C18.4	ENSG00000213226	processed_pseudogene	1/2	-	614	-	-	-	-	rs4950403	-	1	Ensembl	-	-	-	-	-	0.1434	0.0083	0.1888	0.0923	0.2326	0.2546	-	-	-	-
8	previously not reported	GJA5	1:146598683:A:G	1	146598683	G	A	1:146791552:A:G	rs4950404	1	146791552	A	G	0.832351	intron_variant,non_coding_transcript_variant	MODIFIER	RP11-337C18.4	ENSG00000213226	processed_pseudogene	-	1/1	-	-	-	-	-	rs4950404	-	1	Ensembl	-	-	-	-	-	0.1454	0.0136	0.1931	0.0923	0.2326	0.2546	-	-	-	-
8	previously not reported	GJA5	1:146598683:A:G	1	146598683	G	A	1:146791684:C:T	rs72692946	1	146791684	C	T	0.832351	intron_variant,non_coding_transcript_variant	MODIFIER	RP11-337C18.4	ENSG00000213226	processed_pseudogene	-	1/1	-	-	-	-	-	rs72692946	-	1	Ensembl	-	-	-	-	-	0.1448	0.0136	0.1888	0.0923	0.2326	0.2546	-	-	-	-
8	previously not reported	GJA5	1:146598683:A:G	1	146598683	G	A	1:146792016:C:T	rs72692948	1	146792016	T	C	0.832351	downstream_gene_variant	MODIFIER	RP11-337C18.4	ENSG00000213226	processed_pseudogene	-	-	-	-	-	-	-	rs72692948	74	1	Ensembl	-	-	-	-	-	0.1448	0.0136	0.1888	0.0923	0.2326	0.2546	-	-	-	-
8	previously not reported	GJA5	1:146598683:A:G	1	146598683	G	A	1:146792269:A:G	rs72692951	1	146792269	G	A	0.832351	downstream_gene_variant	MODIFIER	RP11-337C18.4	ENSG00000213226	processed_pseudogene	-	-	-	-	-	-	-	rs72692951	327	1	Ensembl	-	-	-	-	-	0.1448	0.0136	0.1888	0.0923	0.2326	0.2546	-	-	-	-
8	previously not reported	GJA5	1:146598683:A:G	1	146598683	G	A	1:146792436:A:G	rs77118461	1	146792436	G	A	0.832351	downstream_gene_variant	MODIFIER	RP11-337C18.4	ENSG00000213226	processed_pseudogene	-	-	-	-	-	-	-	rs77118461	494	1	Ensembl	-	-	-	-	-	0.1448	0.0136	0.1888	0.0923	0.2326	0.2546	-	-	-	-
8	previously not reported	GJA5	1:146598683:A:G	1	146598683	G	A	1:146792659:C:T	rs116479391	1	146792659	C	T	0.832351	downstream_gene_variant	MODIFIER	RP11-337C18.4	ENSG00000213226	processed_pseudogene	-	-	-	-	-	-	-	rs116479391	717	1	Ensembl	-	-	-	-	-	0.1434	0.0083	0.1888	0.0923	0.2326	0.2546	-	-	-	-
8	previously not reported	GJA5	1:146598683:A:G	1	146598683	G	A	1:146792732:A:G	rs78681047	1	146792732	G	A	0.832351	downstream_gene_variant	MODIFIER	RP11-337C18.4	ENSG00000213226	processed_pseudogene	-	-	-	-	-	-	-	rs78681047	790	1	Ensembl	-	-	-	-	-	0.1448	0.0136	0.1888	0.0923	0.2326	0.2546	-	-	-	-
8	previously not reported	GJA5	1:146598683:A:G	1	146598683	G	A	1:146793135:A:G	rs72692953	1	146793135	A	G	0.832351	downstream_gene_variant	MODIFIER	RP11-337C18.4	ENSG00000213226	processed_pseudogene	-	-	-	-	-	-	-	rs72692953	1193	1	Ensembl	-	-	-	-	-	0.1452	0.0129	0.1931	0.0923	0.2326	0.2546	-	-	-	-
8	previously not reported	GJA5	1:146598683:A:G	1	146598683	G	A	1:146793512:D:I	rs201128514	1	146793512	I	G	0.827532	downstream_gene_variant	MODIFIER	RP11-337C18.4	ENSG00000213226	processed_pseudogene	-	-	-	-	-	-	-	rs201128514	1571	1	Ensembl	-	-	-	-	-	0.1456	0.0136	0.1945	0.0923	0.2336	0.2536	-	-	-	-
8	previously not reported	GJA5	1:146598683:A:G	1	146598683	G	A	1:146793662:C:T	rs150955845	1	146793662	T	C	0.832351	downstream_gene_variant	MODIFIER	RP11-337C18.4	ENSG00000213226	processed_pseudogene	-	-	-	-	-	-	-	rs150955845	1720	1	Ensembl	-	-	-	-	-	0.1446	0.0129	0.1888	0.0923	0.2326	0.2546	-	-	-	-
8	previously not reported	GJA5	1:146598683:A:G	1	146598683	G	A	1:146793715:C:G	rs368343217	1	146793715	G	C	0.832351	downstream_gene_variant	MODIFIER	RP11-337C18.4	ENSG00000213226	processed_pseudogene	-	-	-	-	-	-	-	rs368343217	1773	1	Ensembl	-	-	-	-	-	0.1446	0.0129	0.1888	0.0923	0.2326	0.2546	-	-	-	-
8	previously not reported	GJA5	1:146598683:A:G	1	146598683	G	A	1:146795532:A:C	rs113754684	1	146795532	C	A	0.828469	downstream_gene_variant	MODIFIER	RP11-337C18.4	ENSG00000213226	processed_pseudogene	-	-	-	-	-	-	-	rs113754684	3590	1	Ensembl	-	-	-	-	-	0.1446	0.0121	0.1888	0.0923	0.2336	0.2546	-	-	-	-
8	previously not reported	GJA5	1:146598683:A:G	1	146598683	G	A	1:146795603:A:G	rs587602638	1	146795603	G	A	0.828469	downstream_gene_variant	MODIFIER	RP11-337C18.4	ENSG00000213226	processed_pseudogene	-	-	-	-	-	-	-	rs587602638	3661	1	Ensembl	-	-	-	-	-	0.1444	0.0121	0.1873	0.0923	0.2336	0.2546	-	-	-	-
8	previously not reported	GJA5	1:146598683:A:G	1	146598683	G	A	1:146797139:C:G	rs56170749	1	146797139	G	C	0.832351	intergenic_variant	MODIFIER	-	-	-	-	-	-	-	-	-	-	rs56170749	-	-	-	-	-	-	-	-	0.1434	0.0083	0.1888	0.0923	0.2326	0.2546	-	-	-	-
8	previously not reported	GJA5	1:146598683:A:G	1	146598683	G	A	1:146797344:C:T	rs372790330	1	146797344	T	C	0.832351	intergenic_variant	MODIFIER	-	-	-	-	-	-	-	-	-	-	rs372790330	-	-	-	-	-	-	-	-	0.1434	0.0129	0.1844	0.0913	0.2326	0.2526	-	-	-	-
8	previously not reported	GJA5	1:146598683:A:G	1	146598683	G	A	1:146797357:C:G	rs376976939	1	146797357	C	G	0.832351	intergenic_variant	MODIFIER	-	-	-	-	-	-	-	-	-	-	rs376976939	-	-	-	-	-	-	-	-	0.1436	0.0129	0.1844	0.0913	0.2326	0.2536	-	-	-	-
8	previously not reported	GJA5	1:146598683:A:G	1	146598683	G	A	1:146797400:A:G	rs369859949	1	146797400	G	A	0.827506	intergenic_variant	MODIFIER	-	-	-	-	-	-	-	-	-	-	rs369859949	-	-	-	-	-	-	-	-	0.1412	0.0129	0.1787	0.0903	0.2316	0.2474	-	-	-	-
8	previously not reported	GJA5	1:146598683:A:G	1	146598683	G	A	1:146798170:G:T	rs36151811	1	146798170	G	T	0.832351	intergenic_variant	MODIFIER	-	-	-	-	-	-	-	-	-	-	rs36151811	-	-	-	-	-	-	-	-	0.1446	0.0129	0.1888	0.0923	0.2326	0.2546	-	-	-	-
8	previously not reported	GJA5	1:146598683:A:G	1	146598683	G	A	1:146798302:C:T	rs187440423	1	146798302	T	C	0.832351	intergenic_variant	MODIFIER	-	-	-	-	-	-	-	-	-	-	rs187440423	-	-	-	-	-	-	-	-	0.144	0.0106	0.1888	0.0923	0.2326	0.2546	-	-	-	-
8	previously not reported	GJA5	1:146598683:A:G	1	146598683	G	A	1:146798532:A:G	rs55673643	1	146798532	G	A	0.832351	intergenic_variant	MODIFIER	-	-	-	-	-	-	-	-	-	-	rs55673643	-	-	-	-	-	-	-	-	0.1446	0.0129	0.1888	0.0923	0.2326	0.2546	-	-	-	-
8	previously not reported	GJA5	1:146598683:A:G	1	146598683	G	A	1:146799262:G:T	rs113399169	1	146799262	G	T	0.832351	intergenic_variant	MODIFIER	-	-	-	-	-	-	-	-	-	-	rs113399169	-	-	-	-	-	-	-	-	0.1446	0.0129	0.1888	0.0923	0.2326	0.2546	-	-	-	-
8	previously not reported	GJA5	1:146598683:A:G	1	146598683	G	A	1:146800654:C:T	rs112181306	1	146800654	T	C	0.832351	intergenic_variant	MODIFIER	-	-	-	-	-	-	-	-	-	-	rs112181306	-	-	-	-	-	-	-	-	0.1446	0.0129	0.1888	0.0923	0.2326	0.2546	-	-	-	-
8	previously not reported	GJA5	1:146598683:A:G	1	146598683	G	A	1:146801046:C:T	rs112895419	1	146801046	C	T	0.832351	intergenic_variant	MODIFIER	-	-	-	-	-	-	-	-	-	-	rs112895419	-	-	-	-	-	-	-	-	0.1446	0.0129	0.1888	0.0923	0.2326	0.2546	-	-	-	-
8	previously not reported	GJA5	1:146598683:A:G	1	146598683	G	A	1:146801833:A:G	rs111640169	1	146801833	A	G	0.827532	intergenic_variant	MODIFIER	-	-	-	-	-	-	-	-	-	-	rs111640169	-	-	-	-	-	-	-	-	0.1448	0.0129	0.1888	0.0923	0.2336	0.2546	-	-	-	-
8	previously not reported	GJA5	1:146598683:A:G	1	146598683	G	A	1:146801969:A:G	rs80070044	1	146801969	G	A	0.832351	intergenic_variant	MODIFIER	-	-	-	-	-	-	-	-	-	-	rs80070044	-	-	-	-	-	-	-	-	0.1446	0.0129	0.1888	0.0923	0.2326	0.2546	-	-	-	-
8	previously not reported	GJA5	1:146598683:A:G	1	146598683	G	A	1:146802821:C:G	rs72692963	1	146802821	G	C	0.832351	intergenic_variant	MODIFIER	-	-	-	-	-	-	-	-	-	-	rs72692963	-	-	-	-	-	-	-	-	0.1444	0.0121	0.1888	0.0923	0.2326	0.2546	-	-	-	-
8	previously not reported	GJA5	1:146598683:A:G	1	146598683	G	A	1:146803815:C:T	rs72692965	1	146803815	C	T	0.832351	intergenic_variant	MODIFIER	-	-	-	-	-	-	-	-	-	-	rs72692965	-	-	-	-	-	-	-	-	0.1444	0.0121	0.1888	0.0923	0.2326	0.2546	-	-	-	-
8	previously not reported	GJA5	1:146598683:A:G	1	146598683	G	A	1:146804615:A:G	rs72692968	1	146804615	G	A	0.832351	intergenic_variant	MODIFIER	-	-	-	-	-	-	-	-	-	-	rs72692968	-	-	-	-	-	-	-	-	0.1444	0.0121	0.1888	0.0923	0.2326	0.2546	-	-	-	-
8	previously not reported	GJA5	1:146598683:A:G	1	146598683	G	A	1:146804618:C:T	rs72692970	1	146804618	C	T	0.832351	intergenic_variant	MODIFIER	-	-	-	-	-	-	-	-	-	-	rs72692970	-	-	-	-	-	-	-	-	0.1446	0.0121	0.1888	0.0933	0.2326	0.2546	-	-	-	-
8	previously not reported	GJA5	1:146598683:A:G	1	146598683	G	A	1:146804820:C:T	rs72692971	1	146804820	T	C	0.832351	intergenic_variant	MODIFIER	-	-	-	-	-	-	-	-	-	-	rs72692971	-	-	-	-	-	-	-	-	0.1444	0.0121	0.1888	0.0923	0.2326	0.2546	-	-	-	-
8	previously not reported	GJA5	1:146598683:A:G	1	146598683	G	A	1:146805013:A:G	rs72692973	1	146805013	A	G	0.832351	intergenic_variant	MODIFIER	-	-	-	-	-	-	-	-	-	-	rs72692973	-	-	-	-	-	-	-	-	0.1444	0.0121	0.1888	0.0923	0.2326	0.2546	-	-	-	-
8	previously not reported	GJA5	1:146598683:A:G	1	146598683	G	A	1:146805238:A:G	rs72692975	1	146805238	G	A	0.832351	intergenic_variant	MODIFIER	-	-	-	-	-	-	-	-	-	-	rs72692975	-	-	-	-	-	-	-	-	0.1444	0.0121	0.1888	0.0923	0.2326	0.2546	-	-	-	-
8	previously not reported	GJA5	1:146598683:A:G	1	146598683	G	A	1:146807614:C:G	rs4950409	1	146807614	G	C	0.832351	intergenic_variant	MODIFIER	-	-	-	-	-	-	-	-	-	-	rs4950409	-	-	-	-	-	-	-	-	0.1438	0.0076	0.1931	0.0923	0.2326	0.2546	-	-	-	-
8	previously not reported	GJA5	1:146598683:A:G	1	146598683	G	A	1:146807832:C:T	rs72692979	1	146807832	T	C	0.832351	intergenic_variant	MODIFIER	-	-	-	-	-	-	-	-	-	-	rs72692979	-	-	-	-	-	-	-	-	0.1452	0.0121	0.1931	0.0923	0.2326	0.2556	-	-	-	-
8	previously not reported	GJA5	1:146598683:A:G	1	146598683	G	A	1:146809568:A:G	rs72692980	1	146809568	A	G	0.832351	intergenic_variant	MODIFIER	-	-	-	-	-	-	-	-	-	-	rs72692980	-	-	-	-	-	-	-	-	0.1438	0.0076	0.1931	0.0923	0.2326	0.2546	-	-	-	-
8	previously not reported	GJA5	1:146598683:A:G	1	146598683	G	A	1:146812058:C:T	rs7542951	1	146812058	C	T	0.841265	intergenic_variant	MODIFIER	-	-	-	-	-	-	-	-	-	-	rs7542951	-	-	-	-	-	-	-	-	0.1432	0.0076	0.1931	0.0923	0.2306	0.2536	-	-	-	-
8	previously not reported	GJA5	1:147281349:C:T	1	147281349	C	T	1:147281349:C:T	rs1692144	1	147281349	C	T	1	intergenic_variant	MODIFIER	-	-	-	-	-	-	-	-	-	-	rs1692144	-	-	-	-	-	-	-	-	0.1605	0.2587	0.0893	0.0942	0.2078	0.0982	-	-	-	-
9	previously not reported	DPT	1:168692137:C:G	1	168692137	C	G	1:168689291:A:C	rs635954	1	168689291	C	A	0.992239	intron_variant	MODIFIER	DPT	ENSG00000143196	protein_coding	-	1/3	-	-	-	-	-	rs635954	-	-1	Ensembl	-	-	-	-	-	0.4435	0.5129	0.4164	0.5417	0.2773	0.4387	-	-	-	-
9	previously not reported	DPT	1:168692137:C:G	1	168692137	C	G	1:168691851:C:T	rs528953	1	168691851	T	C	0.995341	intron_variant	MODIFIER	DPT	ENSG00000143196	protein_coding	-	1/3	-	-	-	-	-	rs528953	-	-1	Ensembl	-	-	-	-	-	0.4435	0.5121	0.4164	0.5417	0.2773	0.4397	-	-	-	-
9	previously not reported	DPT	1:168692137:C:G	1	168692137	C	G	1:168692137:C:G	rs531706	1	168692137	C	G	1	intron_variant	MODIFIER	DPT	ENSG00000143196	protein_coding	-	1/3	-	-	-	-	-	rs531706	-	-1	Ensembl	-	-	-	-	-	0.4431	0.5098	0.4164	0.5417	0.2773	0.4407	-	-	-	-
9	previously not reported	DPT	1:168692137:C:G	1	168692137	C	G	1:168692244:C:T	rs553721	1	168692244	C	T	0.84395	intron_variant	MODIFIER	DPT	ENSG00000143196	protein_coding	-	1/3	-	-	-	-	-	rs553721	-	-1	Ensembl	-	-	-	-	-	0.4872	0.5151	0.487	0.6458	0.2982	0.4806	-	-	-	-
9	previously not reported	DPT	1:168692137:C:G	1	168692137	C	G	1:168692515:C:G	rs681316	1	168692515	G	C	0.843436	intron_variant	MODIFIER	DPT	ENSG00000143196	protein_coding	-	1/3	-	-	-	-	-	rs681316	-	-1	Ensembl	-	-	-	-	-	0.4874	0.5159	0.487	0.6458	0.2982	0.4806	-	-	-	-
10	previously not reported	PRRX1	1:170615660:C:G	1	170615660	C	G	1:170564139:D:I	rs11303388	1	170564139	I	C	0.807079	upstream_gene_variant	MODIFIER	RP1-79C4.1	ENSG00000235303	lincRNA	-	-	-	-	-	-	-	rs11303388	3855	1	Ensembl	-	-	-	-	-	0.7881	0.7247	0.6671	0.9187	0.8459	0.7658	-	-	-	-
10	previously not reported	PRRX1	1:170615660:C:G	1	170615660	C	G	1:170564829:A:G	rs502706	1	170564829	A	G	0.809159	upstream_gene_variant	MODIFIER	RP1-79C4.1	ENSG00000235303	lincRNA	-	-	-	-	-	-	-	rs502706	3166	1	Ensembl	-	-	-	-	-	0.2119	0.2753	0.3329	0.0813	0.1541	0.2342	-	-	-	-
10	previously not reported	PRRX1	1:170615660:C:G	1	170615660	C	G	1:170572943:D:I	rs113683535	1	170572943	D	I	0.819995	intron_variant,non_coding_transcript_variant	MODIFIER	RP1-79C4.1	ENSG00000235303	lincRNA	-	1/2	-	-	-	-	-	rs113683535	-	1	Ensembl	-	-	-	-	-	0.2057	0.2557	0.3271	0.0813	0.1541	0.2331	-	-	-	-
10	previously not reported	PRRX1	1:170615660:C:G	1	170615660	C	G	1:170573848:C:T	rs12128300	1	170573848	C	T	0.895914	intron_variant,non_coding_transcript_variant	MODIFIER	RP1-79C4.1	ENSG00000235303	lincRNA	-	1/2	-	-	-	-	-	rs12128300	-	1	Ensembl	-	-	-	-	-	0.1821	0.1626	0.33	0.0823	0.1551	0.2342	-	-	-	-
10	previously not reported	PRRX1	1:170615660:C:G	1	170615660	C	G	1:170580418:C:T	rs6664490	1	170580418	C	T	0.903192	intron_variant,non_coding_transcript_variant	MODIFIER	RP1-79C4.1	ENSG00000235303	lincRNA	-	1/2	-	-	-	-	-	rs6664490	-	1	Ensembl	-	-	-	-	-	0.1809	0.1611	0.3285	0.0813	0.1531	0.2342	-	-	-	-
10	previously not reported	PRRX1	1:170615660:C:G	1	170615660	C	G	1:170582464:C:T	rs7540157	1	170582464	T	C	0.93276	intron_variant,non_coding_transcript_variant	MODIFIER	RP1-79C4.1	ENSG00000235303	lincRNA	-	1/2	-	-	-	-	-	rs7540157	-	1	Ensembl	-	-	-	-	-	0.1869	0.1831	0.33	0.0813	0.1531	0.2342	-	-	-	-
10	previously not reported	PRRX1	1:170615660:C:G	1	170615660	C	G	1:170582610:A:G	rs6427266	1	170582610	A	G	0.937401	intron_variant,non_coding_transcript_variant	MODIFIER	RP1-79C4.1	ENSG00000235303	lincRNA	-	1/2	-	-	-	-	-	rs6427266	-	1	Ensembl	-	-	-	-	-	0.1873	0.1846	0.33	0.0813	0.1531	0.2342	-	-	-	-
10	previously not reported	PRRX1	1:170615660:C:G	1	170615660	C	G	1:170582926:C:T	rs6674195	1	170582926	C	T	0.936318	intron_variant,non_coding_transcript_variant	MODIFIER	RP1-79C4.1	ENSG00000235303	lincRNA	-	1/2	-	-	-	-	-	rs6674195	-	1	Ensembl	-	-	-	-	-	0.1863	0.1808	0.33	0.0813	0.1531	0.2342	-	-	-	-
10	previously not reported	PRRX1	1:170615660:C:G	1	170615660	C	G	1:170583040:A:G	rs564298	1	170583040	G	A	0.815099	intron_variant,non_coding_transcript_variant	MODIFIER	RP1-79C4.1	ENSG00000235303	lincRNA	-	1/2	-	-	-	-	-	rs564298	-	1	Ensembl	-	-	-	-	-	0.2101	0.2685	0.3329	0.0813	0.1541	0.2342	-	-	-	-
10	previously not reported	PRRX1	1:170615660:C:G	1	170615660	C	G	1:170583409:C:T	rs567852	1	170583409	T	C	0.815099	intron_variant,non_coding_transcript_variant	MODIFIER	RP1-79C4.1	ENSG00000235303	lincRNA	-	1/2	-	-	-	-	-	rs567852	-	1	Ensembl	-	-	-	-	-	0.2101	0.2685	0.3329	0.0813	0.1541	0.2342	-	-	-	-
10	previously not reported	PRRX1	1:170615660:C:G	1	170615660	C	G	1:170583499:C:G	rs58552094	1	170583499	G	C	0.937401	intron_variant,non_coding_transcript_variant	MODIFIER	RP1-79C4.1	ENSG00000235303	lincRNA	-	1/2	-	-	-	-	-	rs58552094	-	1	Ensembl	-	-	-	-	-	0.1873	0.1846	0.33	0.0813	0.1531	0.2342	-	-	-	-
10	previously not reported	PRRX1	1:170615660:C:G	1	170615660	C	G	1:170585471:C:T	rs621240	1	170585471	C	T	0.815809	intron_variant,non_coding_transcript_variant	MODIFIER	RP1-79C4.1	ENSG00000235303	lincRNA	-	1/2	-	-	-	-	-	rs621240	-	1	Ensembl	-	-	-	-	-	0.2105	0.27	0.3329	0.0813	0.1541	0.2342	-	-	-	-
10	previously not reported	PRRX1	1:170615660:C:G	1	170615660	C	G	1:170586551:C:G	rs7541071	1	170586551	C	G	0.895001	intron_variant,non_coding_transcript_variant	MODIFIER	RP1-79C4.1	ENSG00000235303	lincRNA	-	1/2	-	-	-	-	-	rs7541071	-	1	Ensembl	-	-	-	-	-	0.1803	0.1853	0.3256	0.0813	0.1302	0.2239	-	-	-	-
10	previously not reported	PRRX1	1:170615660:C:G	1	170615660	C	G	1:170590849:A:G	rs7537420	1	170590849	G	A	0.902156	intron_variant,non_coding_transcript_variant	MODIFIER	RP1-79C4.1	ENSG00000235303	lincRNA	-	1/2	-	-	-	-	-	rs7537420	-	1	Ensembl	-	-	-	-	-	0.1795	0.1838	0.3242	0.0813	0.1302	0.2229	-	-	-	-
10	previously not reported	PRRX1	1:170615660:C:G	1	170615660	C	G	1:170592385:C:T	rs502479	1	170592385	C	T	0.81668	intron_variant,non_coding_transcript_variant	MODIFIER	RP1-79C4.1	ENSG00000235303	lincRNA	-	1/2	-	-	-	-	-	rs502479	-	1	Ensembl	-	-	-	-	-	0.2107	0.27	0.3343	0.0813	0.1541	0.2342	-	-	-	-
10	previously not reported	PRRX1	1:170615660:C:G	1	170615660	C	G	1:170596400:C:T	rs2421327	1	170596400	T	C	0.899675	intron_variant,non_coding_transcript_variant	MODIFIER	RP1-79C4.1	ENSG00000235303	lincRNA	-	1/2	-	-	-	-	-	rs2421327	-	1	Ensembl	-	-	-	-	-	0.1803	0.1868	0.3242	0.0813	0.1302	0.2229	-	-	-	-
10	previously not reported	PRRX1	1:170615660:C:G	1	170615660	C	G	1:170597122:C:G	rs146992855	1	170597122	G	C	0.805864	intron_variant,non_coding_transcript_variant	MODIFIER	RP1-79C4.1	ENSG00000235303	lincRNA	-	1/2	-	-	-	-	-	rs60998448	-	1	Ensembl	-	-	-	-	-	0.1625	0.121	0.3199	0.0813	0.1312	0.2229	-	-	-	-
10	previously not reported	PRRX1	1:170615660:C:G	1	170615660	C	G	1:170605146:C:T	rs6665169	1	170605146	C	T	0.919579	intron_variant,non_coding_transcript_variant	MODIFIER	RP1-79C4.1	ENSG00000235303	lincRNA	-	1/2	-	-	-	-	-	rs6665169	-	1	Ensembl	-	-	-	-	-	0.1847	0.1846	0.3242	0.0813	0.1541	0.2239	-	-	-	-
10	previously not reported	PRRX1	1:170615660:C:G	1	170615660	C	G	1:170611354:A:G	rs61824885	1	170611354	A	G	0.951019	intron_variant,non_coding_transcript_variant	MODIFIER	RP1-79C4.1	ENSG00000235303	lincRNA	-	2/2	-	-	-	-	-	rs61824885	-	1	Ensembl	-	-	-	-	-	0.2025	0.2405	0.3372	0.0813	0.1541	0.2301	-	-	-	-
10	previously not reported	PRRX1	1:170615660:C:G	1	170615660	C	G	1:170613251:G:T	rs725974	1	170613251	T	G	0.998802	intron_variant,non_coding_transcript_variant	MODIFIER	RP1-79C4.1	ENSG00000235303	lincRNA	-	2/2	-	-	-	-	-	rs725974	-	1	Ensembl	-	-	-	-	-	0.1937	0.2088	0.3343	0.0813	0.1541	0.2301	-	-	-	-
10	previously not reported	PRRX1	1:170615660:C:G	1	170615660	C	G	1:170615660:C:G	rs61824886	1	170615660	C	G	1	non_coding_transcript_exon_variant	MODIFIER	RP1-79C4.1	ENSG00000235303	lincRNA	3/3	-	1103	-	-	-	-	rs61824886	-	1	Ensembl	-	-	-	-	-	0.1939	0.2095	0.3343	0.0813	0.1541	0.2301	-	-	-	-
10	previously not reported	PRRX1	1:170615660:C:G	1	170615660	C	G	1:170615724:A:T	rs61824887	1	170615724	A	T	0.891559	non_coding_transcript_exon_variant	MODIFIER	RP1-79C4.1	ENSG00000235303	lincRNA	3/3	-	1167	-	-	-	-	rs61824887	-	1	Ensembl	-	-	-	-	-	0.1763	0.1452	0.33	0.0813	0.1541	0.2301	-	-	-	-
10	previously not reported	PRRX1	1:170615660:C:G	1	170615660	C	G	1:170616727:A:C	rs6663331	1	170616727	A	C	0.837762	downstream_gene_variant	MODIFIER	RP1-79C4.1	ENSG00000235303	lincRNA	-	-	-	-	-	-	-	rs6663331	247	1	Ensembl	-	-	-	-	-	0.1711	0.1263	0.3271	0.0813	0.1551	0.2301	-	-	-	-
10	previously not reported	PRRX1	1:170615660:C:G	1	170615660	C	G	1:170619288:A:T	rs12131714	1	170619288	A	T	0.845853	downstream_gene_variant	MODIFIER	RP1-79C4.1	ENSG00000235303	lincRNA	-	-	-	-	-	-	-	rs12131714	2808	1	Ensembl	-	-	-	-	-	0.1789	0.1475	0.3329	0.0804	0.159	0.2342	-	-	-	-
10	previously not reported	PRRX1	1:170615660:C:G	1	170615660	C	G	1:170624762:G:T	rs17615674	1	170624762	T	G	0.807986	intergenic_variant	MODIFIER	-	-	-	-	-	-	-	-	-	-	rs17615674	-	-	-	-	-	-	-	-	0.1857	0.1702	0.3372	0.0804	0.16	0.2342	-	-	-	-
10	previously not reported	PRRX1	1:170615660:C:G	1	170615660	C	G	1:170627172:A:G	rs61817372	1	170627172	A	G	0.802514	upstream_gene_variant	MODIFIER	PRRX1	ENSG00000116132	processed_transcript	-	-	-	-	-	-	-	rs61817372	4697	1	Ensembl	-	-	-	-	-	0.1859	0.1687	0.3372	0.0833	0.16	0.2342	-	-	-	-
10	previously not reported	PRRX1	1:170665348:C:T	1	170665348	C	T	1:170644498:A:G	rs61817379	1	170644498	A	G	0.861106	intron_variant	MODIFIER	PRRX1	ENSG00000116132	protein_coding	-	1/3	-	-	-	-	-	rs61817379	-	1	Ensembl	-	-	-	-	-	0.2103	0.0469	0.3386	0.123	0.3529	0.2832	-	-	-	-
10	previously not reported	PRRX1	1:170665348:C:T	1	170665348	C	T	1:170645473:D:I	rs5778675	1	170645473	D	I	0.857405	intron_variant	MODIFIER	PRRX1	ENSG00000116132	protein_coding	-	1/3	-	-	-	-	-	rs5778675	-	1	Ensembl	-	-	-	-	-	0.2718	0.2617	0.3602	0.123	0.3559	0.2894	-	-	-	-
10	previously not reported	PRRX1	1:170665348:C:T	1	170665348	C	T	1:170645489:C:T	rs2150026	1	170645489	T	C	0.865439	intron_variant	MODIFIER	PRRX1	ENSG00000116132	protein_coding	-	1/3	-	-	-	-	-	rs2150026	-	1	Ensembl	-	-	-	-	-	0.2256	0.1067	0.3444	0.12	0.3539	0.2791	-	-	-	-
10	previously not reported	PRRX1	1:170665348:C:T	1	170665348	C	T	1:170645774:C:G	rs1016819	1	170645774	C	G	0.869784	intron_variant	MODIFIER	PRRX1	ENSG00000116132	protein_coding	-	1/3	-	-	-	-	-	rs1016819	-	1	Ensembl	-	-	-	-	-	0.2093	0.0477	0.3386	0.121	0.3529	0.2791	-	-	-	-
10	previously not reported	PRRX1	1:170665348:C:T	1	170665348	C	T	1:170655027:D:I	rs11455495	1	170655027	D	I	0.863256	intron_variant	MODIFIER	PRRX1	ENSG00000116132	protein_coding	-	1/3	-	-	-	-	-	rs11455495	-	1	Ensembl	-	-	-	-	-	0.2226	0.1157	0.3401	0.119	0.3499	0.2597	-	-	-	-
10	previously not reported	PRRX1	1:170665348:C:T	1	170665348	C	T	1:170657335:A:C	rs17550940	1	170657335	A	C	0.893838	intron_variant	MODIFIER	PRRX1	ENSG00000116132	protein_coding	-	1/3	-	-	-	-	-	rs17550940	-	1	Ensembl	-	-	-	-	-	0.2055	0.0507	0.3386	0.1141	0.3519	0.2638	-	-	-	-
10	previously not reported	PRRX1	1:170665348:C:T	1	170665348	C	T	1:170659832:D:I	rs111874715	1	170659832	I	T	0.956729	intron_variant	MODIFIER	PRRX1	ENSG00000116132	protein_coding	-	1/3	-	-	-	-	-	rs111874715	-	1	Ensembl	-	-	-	-	-	0.2025	0.0507	0.3285	0.1131	0.34	0.2689	-	-	-	-
10	previously not reported	PRRX1	1:170665348:C:T	1	170665348	C	T	1:170661470:A:G	rs4656221	1	170661470	A	G	0.985301	intron_variant	MODIFIER	PRRX1	ENSG00000116132	protein_coding	-	1/3	-	-	-	-	-	rs4656221	-	1	Ensembl	-	-	-	-	-	0.2001	0.0499	0.3242	0.1141	0.334	0.2658	-	-	-	-
10	previously not reported	PRRX1	1:170665348:C:T	1	170665348	C	T	1:170661688:A:T	rs4656222	1	170661688	T	A	0.985301	intron_variant	MODIFIER	PRRX1	ENSG00000116132	protein_coding	-	1/3	-	-	-	-	-	rs4656222	-	1	Ensembl	-	-	-	-	-	0.1997	0.0499	0.3242	0.1131	0.334	0.2648	-	-	-	-
10	previously not reported	PRRX1	1:170665348:C:T	1	170665348	C	T	1:170662120:A:G	rs61817382	1	170662120	A	G	0.985301	intron_variant	MODIFIER	PRRX1	ENSG00000116132	protein_coding	-	1/3	-	-	-	-	-	rs61817382	-	1	Ensembl	-	-	-	-	-	0.2388	0.1921	0.3357	0.1131	0.334	0.2648	-	-	-	-
10	previously not reported	PRRX1	1:170665348:C:T	1	170665348	C	T	1:170665348:C:T	rs61817383	1	170665348	C	T	1	intron_variant	MODIFIER	PRRX1	ENSG00000116132	protein_coding	-	1/3	-	-	-	-	-	rs61817383	-	1	Ensembl	-	-	-	-	-	0.1989	0.0499	0.3242	0.1131	0.331	0.2638	-	-	-	-
10	previously not reported	PRRX1	1:170665348:C:T	1	170665348	C	T	1:170671541:A:G	rs61817384	1	170671541	G	A	0.870537	intron_variant	MODIFIER	PRRX1	ENSG00000116132	protein_coding	-	1/3	-	-	-	-	-	rs61817384	-	1	Ensembl	-	-	-	-	-	0.1987	0.0537	0.3184	0.123	0.3181	0.2648	-	-	-	-
10	previously not reported	PRRX1	1:170665348:C:T	1	170665348	C	T	1:170671962:G:T	rs17551016	1	170671962	G	T	0.870537	intron_variant	MODIFIER	PRRX1	ENSG00000116132	protein_coding	-	1/3	-	-	-	-	-	rs17551016	-	1	Ensembl	-	-	-	-	-	-	-	-	-	-	-	-	-	-	-
10	previously not reported	PRRX1	1:170665348:C:T	1	170665348	C	T	1:170672737:D:I	rs113880067	1	170672737	I	G	0.85072	intron_variant	MODIFIER	PRRX1	ENSG00000116132	protein_coding	-	1/3	-	-	-	-	-	rs113880067	-	1	Ensembl	-	-	-	-	-	0.2049	0.0628	0.3256	0.129	0.3221	0.2689	-	-	-	-
10	previously not reported	PRRX1	1:170665348:C:T	1	170665348	C	T	1:170681971:A:C	rs61817386	1	170681971	C	A	0.866158	intron_variant	MODIFIER	PRRX1	ENSG00000116132	protein_coding	-	1/3	-	-	-	-	-	rs61817386	-	1	Ensembl	-	-	-	-	-	0.1993	0.056	0.3199	0.123	0.3171	0.2648	-	-	-	-
10	previously not reported	PRRX1	1:170665348:C:T	1	170665348	C	T	1:170686662:C:T	rs59188802	1	170686662	T	C	0.852695	intron_variant	MODIFIER	PRRX1	ENSG00000116132	protein_coding	-	1/3	-	-	-	-	-	rs59188802	-	1	Ensembl	-	-	-	-	-	0.1909	0.0295	0.3141	0.123	0.3141	0.2648	-	-	-	-
10	previously not reported	PRRX1	1:170665348:C:T	1	170665348	C	T	1:170688005:C:T	rs736022	1	170688005	C	T	0.852695	intron_variant	MODIFIER	PRRX1	ENSG00000116132	protein_coding	-	1/3	-	-	-	-	-	rs736022	-	1	Ensembl	-	-	-	-	-	0.1905	0.0295	0.3127	0.123	0.3141	0.2638	-	-	1	17903299,18505370
10	previously not reported	PRRX1	1:170665348:C:T	1	170665348	C	T	1:170691140:A:T	rs4656796	1	170691140	A	T	0.828419	intron_variant	MODIFIER	PRRX1	ENSG00000116132	protein_coding	-	2/3	-	-	-	-	-	rs4656796	-	1	Ensembl	-	-	-	-	-	0.1917	0.0295	0.3141	0.123	0.3191	0.2638	-	-	-	-
10	previously not reported	PRRX1	1:170665348:C:T	1	170665348	C	T	1:170692104:C:T	rs17551172	1	170692104	C	T	0.847662	intron_variant	MODIFIER	PRRX1	ENSG00000116132	protein_coding	-	2/3	-	-	-	-	-	rs17551172	-	1	Ensembl	-	-	-	-	-	0.2079	0.0915	0.3184	0.123	0.3151	0.2638	-	-	-	-
10	previously not reported	PRRX1	1:170665348:C:T	1	170665348	C	T	1:170693914:C:T	rs2421491	1	170693914	T	C	0.852695	intron_variant	MODIFIER	PRRX1	ENSG00000116132	protein_coding	-	2/3	-	-	-	-	-	rs2421491	-	1	Ensembl	-	-	-	-	-	0.1909	0.0295	0.3141	0.123	0.3141	0.2648	-	-	1	17903299
10	previously not reported	PRRX1	1:170665348:C:T	1	170665348	C	T	1:170699149:A:G	rs12409048	1	170699149	G	A	0.847662	intron_variant	MODIFIER	PRRX1	ENSG00000116132	protein_coding	-	3/3	-	-	-	-	-	rs12409048	-	1	Ensembl	-	-	-	-	-	0.1951	0.0416	0.3184	0.123	0.3151	0.2658	-	-	-	-
11	previously not reported	C1orf98	1:200271408:C:T	1	200271408	C	T	1:200271408:C:T	rs819636	1	200271408	C	T	1	regulatory_region_variant	MODIFIER	-	-	promoter_flanking_region	-	-	-	-	-	-	-	rs819636	-	-	-	-	-	-	-	-	0.6851	0.7254	0.7305	0.6696	0.664	0.636	-	-	-	-
12	previously not reported	HLX	1:221138612:C:T	1	221138612	T	C	1:221115429:D:I	rs5781196	1	221115429	D	I	0.958512	intergenic_variant	MODIFIER	-	-	-	-	-	-	-	-	-	-	rs5781196	-	-	-	-	-	-	-	-	-	0.4357	0.072	0.0397	0.0239	0.0879	-	-	-	-
12	previously not reported	HLX	1:221138612:C:T	1	221138612	T	C	1:221117700:A:G	rs10863573	1	221117700	G	A	0.966591	intergenic_variant	MODIFIER	-	-	-	-	-	-	-	-	-	-	rs10863573	-	-	-	-	-	-	-	-	0.3728	0.236	0.4539	0.3681	0.5427	0.3303	-	-	-	-
12	previously not reported	HLX	1:221138612:C:T	1	221138612	T	C	1:221126914:A:G	rs10779417	1	221126914	G	A	0.954625	regulatory_region_variant	MODIFIER	-	-	open_chromatin_region	-	-	-	-	-	-	-	rs10779417	-	-	-	-	-	-	-	-	0.3868	0.2632	0.4813	0.381	0.5427	0.3323	-	-	-	-
12	previously not reported	HLX	1:221138612:C:T	1	221138612	T	C	1:221134350:A:G	rs1414519	1	221134350	G	A	0.994484	intergenic_variant	MODIFIER	-	-	-	-	-	-	-	-	-	-	rs1414519	-	-	-	-	-	-	-	-	0.3784	0.239	0.4712	0.379	0.5427	0.3313	-	-	-	-
12	previously not reported	HLX	1:221138612:C:T	1	221138612	T	C	1:221135671:A:G	rs10495159	1	221135671	A	G	0.994484	regulatory_region_variant	MODIFIER	-	-	enhancer	-	-	-	-	-	-	-	rs10495159	-	-	-	-	-	-	-	-	0.3784	0.239	0.4712	0.379	0.5427	0.3313	-	-	-	-
12	previously not reported	HLX	1:221138612:C:T	1	221138612	T	C	1:221136642:C:T	rs1335927	1	221136642	C	T	0.994484	intergenic_variant	MODIFIER	-	-	-	-	-	-	-	-	-	-	rs1335927	-	-	-	-	-	-	-	-	0.3784	0.239	0.4712	0.379	0.5427	0.3313	-	-	-	-
12	previously not reported	HLX	1:221138612:C:T	1	221138612	T	C	1:221136787:C:T	rs1335929	1	221136787	T	C	0.992896	intergenic_variant	MODIFIER	-	-	-	-	-	-	-	-	-	-	rs1335929	-	-	-	-	-	-	-	-	0.3784	0.239	0.4712	0.379	0.5437	0.3303	-	-	-	-
12	previously not reported	HLX	1:221138612:C:T	1	221138612	T	C	1:221138300:G:T	rs12140805	1	221138300	G	T	0.995281	intergenic_variant	MODIFIER	-	-	-	-	-	-	-	-	-	-	rs12140805	-	-	-	-	-	-	-	-	0.3786	0.239	0.4726	0.378	0.5427	0.3323	-	-	-	-
12	previously not reported	HLX	1:221138612:C:T	1	221138612	T	C	1:221138612:C:T	rs6678632	1	221138612	T	C	1	intergenic_variant	MODIFIER	-	-	-	-	-	-	-	-	-	-	rs6678632	-	-	-	-	-	-	-	-	0.3774	0.2352	0.4726	0.378	0.5427	0.3313	-	-	-	-
12	previously not reported	HLX	1:221138612:C:T	1	221138612	T	C	1:221140832:C:T	rs12022930	1	221140832	T	C	0.996062	intergenic_variant	MODIFIER	-	-	-	-	-	-	-	-	-	-	rs12022930	-	-	-	-	-	-	-	-	0.3784	0.239	0.4726	0.378	0.5427	0.3313	-	-	-	-
12	previously not reported	HLX	1:221138612:C:T	1	221138612	T	C	1:221142346:A:C	rs11118632	1	221142346	C	A	0.995266	intergenic_variant	MODIFIER	-	-	-	-	-	-	-	-	-	-	rs11118632	-	-	-	-	-	-	-	-	0.3782	0.239	0.4712	0.378	0.5427	0.3313	-	-	-	-
13	previously not reported	ADCK3	1:227173477:C:G	1	227173477	G	C	1:227171584:D:I	rs3215919	1	227171584	I	G	0.827186	intron_variant	MODIFIER	ADCK3	ENSG00000163050	protein_coding	-	15/19	-	-	-	-	-	rs3215919	-	1	Ensembl	-	-	-	-	-	0.2622	0.2776	0.2709	0.1359	0.4314	0.1912	-	-	-	-
13	previously not reported	ADCK3	1:227173477:C:G	1	227173477	G	C	1:227172903:A:G	rs2297415	1	227172903	G	A	0.879298	intron_variant	MODIFIER	ADCK3	ENSG00000163050	protein_coding	-	18/19	-	-	-	-	-	rs2297415	-	1	Ensembl	-	-	-	-	-	0.2696	0.2731	0.2853	0.1587	0.4414	0.1912	-	-	-	-
13	previously not reported	ADCK3	1:227173477:C:G	1	227173477	G	C	1:227172935:C:G	rs2297416	1	227172935	C	G	0.864723	intron_variant	MODIFIER	ADCK3	ENSG00000163050	protein_coding	-	18/19	-	-	-	-	-	rs2297416	-	1	Ensembl	-	-	-	-	-	0.2652	0.2572	0.2839	0.1577	0.4414	0.1922	-	-	-	-
13	previously not reported	ADCK3	1:227173477:C:G	1	227173477	G	C	1:227173477:C:G	rs3768419	1	227173477	G	C	1	intron_variant	MODIFIER	ADCK3	ENSG00000163050	protein_coding	-	19/19	-	-	-	-	-	rs3768419	-	1	Ensembl	-	-	-	-	-	0.2937	0.2731	0.3084	0.1587	0.494	0.2444	-	-	-	-
13	previously not reported	ADCK3	1:227173477:C:G	1	227173477	G	C	1:227173892:A:T	rs17592479	1	227173892	T	A	0.890113	intron_variant	MODIFIER	ADCK3	ENSG00000163050	protein_coding	-	19/19	-	-	-	-	-	rs17592479	-	1	Ensembl	-	-	-	-	-	0.3123	0.2867	0.3112	0.2143	0.4881	0.2679	-	-	-	-
13	previously not reported	ADCK3	1:227173477:C:G	1	227173477	G	C	1:227174210:C:T	rs3738725	1	227174210	T	C	0.901467	synonymous_variant	LOW	ADCK3	ENSG00000163050	protein_coding	20/20	-	4487	1716	572	S	tcT/tcC	rs3738725	-	1	Ensembl	-	-	-	-	-	0.3139	0.2882	0.3127	0.2133	0.494	0.2679	benign,likely_benign	-	1	-
13	previously not reported	ADCK3	1:227173477:C:G	1	227173477	G	C	1:227174823:D:I	rs11420839	1	227174823	D	I	0.995429	3_prime_UTR_variant	MODIFIER	ADCK3	ENSG00000163050	protein_coding	20/20	-	5100-5101	-	-	-	-	rs11420839	-	1	Ensembl	-	-	-	-	-	0.2927	0.2731	0.3084	0.1577	0.493	0.2413	-	-	-	-
13	previously not reported	ADCK3	1:227173477:C:G	1	227173477	G	C	1:227175245:D:I	rs3215920	1	227175245	D	I	0.816899	3_prime_UTR_variant	MODIFIER	ADCK3	ENSG00000163050	protein_coding	20/20	-	5522-5523	-	-	-	-	rs3215920	-	1	Ensembl	-	-	-	-	-	0.2548	0.1354	0.2997	0.1587	0.4901	0.2413	benign	-	1	-
13	previously not reported	ADCK3	1:227173477:C:G	1	227173477	G	C	1:227175367:G:T	rs6426558	1	227175367	G	T	0.846975	downstream_gene_variant	MODIFIER	CDC42BPA	ENSG00000143776	protein_coding	-	-	-	-	-	-	-	rs6426558	2199	-1	Ensembl	-	-	-	-	-	0.3013	0.2458	0.3112	0.2133	0.4901	0.2658	-	-	-	-
13	previously not reported	ADCK3	1:227173477:C:G	1	227173477	G	C	1:227175967:D:I	rs10586161	1	227175967	I	C	0.994518	downstream_gene_variant	MODIFIER	CDC42BPA	ENSG00000143776	protein_coding	-	-	-	-	-	-	-	rs10586161	1596	-1	Ensembl	-	-	-	-	-	0.2925	0.2723	0.3084	0.1577	0.493	0.2413	-	-	-	-
13	previously not reported	ADCK3	1:227173477:C:G	1	227173477	G	C	1:227176162:C:G	rs34267809	1	227176162	C	G	0.891154	downstream_gene_variant	MODIFIER	CDC42BPA	ENSG00000143776	protein_coding	-	-	-	-	-	-	-	rs34267809	1404	-1	Ensembl	-	-	-	-	-	0.3135	0.2844	0.3127	0.2133	0.493	0.272	-	-	-	-
13	previously not reported	ADCK3	1:227173477:C:G	1	227173477	G	C	1:227176164:D:I	rs10586162	1	227176164	I	A	0.90986	downstream_gene_variant	MODIFIER	CDC42BPA	ENSG00000143776	protein_coding	-	-	-	-	-	-	-	rs10586162	1399	-1	Ensembl	-	-	-	-	-	0.3087	0.2716	0.3084	0.2063	0.493	0.2751	-	-	-	-
13	previously not reported	ADCK3	1:227173477:C:G	1	227173477	G	C	1:227177061:C:T	rs12406714	1	227177061	T	C	0.994518	downstream_gene_variant	MODIFIER	CDC42BPA	ENSG00000143776	protein_coding	-	-	-	-	-	-	-	rs12406714	505	-1	Ensembl	-	-	-	-	-	0.2925	0.2723	0.3084	0.1577	0.493	0.2413	-	-	-	-
13	previously not reported	ADCK3	1:227173477:C:G	1	227173477	G	C	1:227177193:A:G	rs3768421	1	227177193	G	A	0.969351	downstream_gene_variant	MODIFIER	CDC42BPA	ENSG00000143776	protein_coding	-	-	-	-	-	-	-	rs3768421	373	-1	Ensembl	-	-	-	-	-	0.2885	0.2723	0.3084	0.1349	0.494	0.2434	-	-	-	-
13	previously not reported	ADCK3	1:227173477:C:G	1	227173477	G	C	1:227177293:A:G	rs3768423	1	227177293	G	A	0.993599	downstream_gene_variant	MODIFIER	CDC42BPA	ENSG00000143776	protein_coding	-	-	-	-	-	-	-	rs3768423	273	-1	Ensembl	-	-	-	-	-	0.2927	0.2731	0.3084	0.1577	0.493	0.2413	-	-	-	-
13	previously not reported	ADCK3	1:227173477:C:G	1	227173477	G	C	1:227177444:A:G	rs3768424	1	227177444	A	G	0.900337	downstream_gene_variant	MODIFIER	CDC42BPA	ENSG00000143776	protein_coding	-	-	-	-	-	-	-	rs3768424	122	-1	Ensembl	-	-	-	-	-	0.3133	0.2867	0.3127	0.2133	0.493	0.2679	-	-	-	-
13	previously not reported	ADCK3	1:227173477:C:G	1	227173477	G	C	1:227178962:C:T	rs1045287	1	227178962	T	C	0.883858	3_prime_UTR_variant	MODIFIER	CDC42BPA	ENSG00000143776	protein_coding	36/36	-	9459	-	-	-	-	rs1045287	-	-1	Ensembl	-	-	-	-	-	0.269	0.2716	0.2839	0.1577	0.4423	0.1912	-	-	-	-
13	previously not reported	ADCK3	1:227173477:C:G	1	227173477	G	C	1:227179054:A:G	rs1045285	1	227179054	G	A	0.852954	3_prime_UTR_variant	MODIFIER	CDC42BPA	ENSG00000143776	protein_coding	36/36	-	9367	-	-	-	-	rs1045285	-	-1	Ensembl	-	-	-	-	-	0.2644	0.2504	0.2824	0.1577	0.4414	0.1984	-	-	-	-
13	previously not reported	ADCK3	1:227173477:C:G	1	227173477	G	C	1:227179501:D:I	rs138094768	1	227179501	I	A	0.883858	3_prime_UTR_variant	MODIFIER	CDC42BPA	ENSG00000143776	protein_coding	36/36	-	8910-8919	-	-	-	-	rs138094768	-	-1	Ensembl	-	-	-	-	-	0.269	0.2716	0.2839	0.1577	0.4423	0.1912	-	-	-	-
13	previously not reported	ADCK3	1:227173477:C:G	1	227173477	G	C	1:227180947:A:C	rs3795445	1	227180947	A	C	0.994518	3_prime_UTR_variant	MODIFIER	CDC42BPA	ENSG00000143776	protein_coding	36/36	-	7474	-	-	-	-	rs3795445	-	-1	Ensembl	-	-	-	-	-	0.2925	0.2723	0.3084	0.1577	0.493	0.2413	-	-	-	-
13	previously not reported	ADCK3	1:227173477:C:G	1	227173477	G	C	1:227180981:C:T	rs3795446	1	227180981	T	C	0.994518	3_prime_UTR_variant	MODIFIER	CDC42BPA	ENSG00000143776	protein_coding	36/36	-	7440	-	-	-	-	rs3795446	-	-1	Ensembl	-	-	-	-	-	0.2925	0.2723	0.3084	0.1577	0.493	0.2413	-	-	-	-
13	previously not reported	ADCK3	1:227173477:C:G	1	227173477	G	C	1:227181554:C:G	rs1062908	1	227181554	C	G	0.879768	3_prime_UTR_variant	MODIFIER	CDC42BPA	ENSG00000143776	protein_coding	36/36	-	6867	-	-	-	-	rs1062908	-	-1	Ensembl	-	-	-	-	-	0.268	0.2678	0.2839	0.1577	0.4423	0.1912	-	-	-	-
13	previously not reported	ADCK3	1:227173477:C:G	1	227173477	G	C	1:227181838:G:T	rs3795449	1	227181838	T	G	0.883858	3_prime_UTR_variant	MODIFIER	CDC42BPA	ENSG00000143776	protein_coding	36/36	-	6583	-	-	-	-	rs3795449	-	-1	Ensembl	-	-	-	-	-	0.269	0.2716	0.2839	0.1577	0.4423	0.1912	-	-	-	-
13	previously not reported	ADCK3	1:227173477:C:G	1	227173477	G	C	1:227181923:C:T	rs3795451	1	227181923	C	T	0.805382	3_prime_UTR_variant	MODIFIER	CDC42BPA	ENSG00000143776	protein_coding	36/36	-	6498	-	-	-	-	rs3795451	-	-1	Ensembl	-	-	-	-	-	-	-	-	-	-	-	-	-	-	-
13	previously not reported	ADCK3	1:227173477:C:G	1	227173477	G	C	1:227183125:C:T	rs1343743	1	227183125	C	T	0.882034	intron_variant	MODIFIER	CDC42BPA	ENSG00000143776	protein_coding	-	34/35	-	-	-	-	-	rs1343743	-	-1	Ensembl	-	-	-	-	-	0.2694	0.2723	0.2839	0.1577	0.4433	0.1912	-	-	-	15192806
13	previously not reported	ADCK3	1:227173477:C:G	1	227173477	G	C	1:227183434:C:T	rs6664955	1	227183434	T	C	0.883858	intron_variant	MODIFIER	CDC42BPA	ENSG00000143776	protein_coding	-	34/35	-	-	-	-	-	rs6664955	-	-1	Ensembl	-	-	-	-	-	0.269	0.2716	0.2839	0.1577	0.4423	0.1912	-	-	-	-
13	previously not reported	ADCK3	1:227173477:C:G	1	227173477	G	C	1:227184074:A:G	rs10916075	1	227184074	G	A	0.860695	intron_variant	MODIFIER	CDC42BPA	ENSG00000143776	protein_coding	-	34/35	-	-	-	-	-	rs10916075	-	-1	Ensembl	-	-	-	-	-	0.2632	0.2511	0.2824	0.1577	0.4414	0.1912	-	-	-	-
13	previously not reported	ADCK3	1:227173477:C:G	1	227173477	G	C	1:227185047:C:T	rs143239691	1	227185047	C	T	0.883858	intron_variant	MODIFIER	CDC42BPA	ENSG00000143776	protein_coding	-	34/35	-	-	-	-	-	rs9730515	-	-1	Ensembl	-	-	-	-	-	0.269	0.2716	0.2839	0.1577	0.4423	0.1912	-	-	-	-
13	previously not reported	ADCK3	1:227173477:C:G	1	227173477	G	C	1:227185288:A:T	rs111796889	1	227185288	A	T	0.860695	intron_variant	MODIFIER	CDC42BPA	ENSG00000143776	protein_coding	-	34/35	-	-	-	-	-	rs9726080	-	-1	Ensembl	-	-	-	-	-	0.2632	0.2511	0.2824	0.1577	0.4414	0.1912	-	-	-	-
13	previously not reported	ADCK3	1:227173477:C:G	1	227173477	G	C	1:227185375:G:T	rs9727512	1	227185375	G	T	0.859925	intron_variant	MODIFIER	CDC42BPA	ENSG00000143776	protein_coding	-	34/35	-	-	-	-	-	rs9727512	-	-1	Ensembl	-	-	-	-	-	0.263	0.2511	0.2824	0.1577	0.4404	0.1912	-	-	-	-
13	previously not reported	ADCK3	1:227173477:C:G	1	227173477	G	C	1:227185385:A:G	rs9726097	1	227185385	A	G	0.860695	intron_variant	MODIFIER	CDC42BPA	ENSG00000143776	protein_coding	-	34/35	-	-	-	-	-	rs9726097	-	-1	Ensembl	-	-	-	-	-	0.2632	0.2511	0.2824	0.1577	0.4414	0.1912	-	-	-	-
13	previously not reported	ADCK3	1:227173477:C:G	1	227173477	G	C	1:227186192:C:T	rs144035016	1	227186192	C	T	0.859854	intron_variant	MODIFIER	CDC42BPA	ENSG00000143776	protein_coding	-	34/35	-	-	-	-	-	rs9724937	-	-1	Ensembl	-	-	-	-	-	0.263	0.2504	0.2824	0.1577	0.4414	0.1912	-	-	-	-
13	previously not reported	ADCK3	1:227173477:C:G	1	227173477	G	C	1:227187007:A:G	rs12409230	1	227187007	G	A	0.860695	intron_variant	MODIFIER	CDC42BPA	ENSG00000143776	protein_coding	-	34/35	-	-	-	-	-	rs12409230	-	-1	Ensembl	-	-	-	-	-	0.2632	0.2511	0.2824	0.1577	0.4414	0.1912	-	-	-	-
13	previously not reported	ADCK3	1:227173477:C:G	1	227173477	G	C	1:227187440:C:T	rs11577007	1	227187440	C	T	0.860695	intron_variant	MODIFIER	CDC42BPA	ENSG00000143776	protein_coding	-	34/35	-	-	-	-	-	rs11577007	-	-1	Ensembl	-	-	-	-	-	0.2632	0.2511	0.2824	0.1577	0.4414	0.1912	-	-	-	-
13	previously not reported	ADCK3	1:227173477:C:G	1	227173477	G	C	1:227188371:A:C	rs7541033	1	227188371	C	A	0.859854	intron_variant	MODIFIER	CDC42BPA	ENSG00000143776	protein_coding	-	34/35	-	-	-	-	-	rs7541033	-	-1	Ensembl	-	-	-	-	-	0.263	0.2504	0.2824	0.1577	0.4414	0.1912	-	-	-	-
13	previously not reported	ADCK3	1:227173477:C:G	1	227173477	G	C	1:227189642:A:C	rs11578103	1	227189642	C	A	0.87672	intron_variant	MODIFIER	CDC42BPA	ENSG00000143776	protein_coding	-	34/35	-	-	-	-	-	rs11578103	-	-1	Ensembl	-	-	-	-	-	0.269	0.2716	0.2853	0.1558	0.4423	0.1922	-	-	-	-
13	previously not reported	ADCK3	1:227173477:C:G	1	227173477	G	C	1:227189969:C:T	rs12409428	1	227189969	T	C	0.883858	intron_variant	MODIFIER	CDC42BPA	ENSG00000143776	protein_coding	-	34/35	-	-	-	-	-	rs12409428	-	-1	Ensembl	-	-	-	-	-	0.269	0.2716	0.2839	0.1577	0.4423	0.1912	-	-	-	-
13	previously not reported	ADCK3	1:227173477:C:G	1	227173477	G	C	1:227190233:A:G	rs6684821	1	227190233	G	A	0.859854	intron_variant	MODIFIER	CDC42BPA	ENSG00000143776	protein_coding	-	34/35	-	-	-	-	-	rs6684821	-	-1	Ensembl	-	-	-	-	-	0.263	0.2504	0.2824	0.1577	0.4414	0.1912	-	-	-	-
13	previously not reported	ADCK3	1:227173477:C:G	1	227173477	G	C	1:227191227:C:T	rs3738729	1	227191227	C	T	0.881414	intron_variant	MODIFIER	CDC42BPA	ENSG00000143776	protein_coding	-	34/35	-	-	-	-	-	rs3738729	-	-1	Ensembl	-	-	-	-	-	0.2684	0.2708	0.2839	0.1567	0.4414	0.1912	-	-	-	-
13	previously not reported	ADCK3	1:227173477:C:G	1	227173477	G	C	1:227192579:A:C	rs2297418	1	227192579	A	C	0.876418	intron_variant	MODIFIER	CDC42BPA	ENSG00000143776	protein_coding	-	34/35	-	-	-	-	-	rs2297418	-	-1	Ensembl	-	-	-	-	-	0.2676	0.267	0.2824	0.1567	0.4433	0.1912	-	-	-	-
13	previously not reported	ADCK3	1:227173477:C:G	1	227173477	G	C	1:227195500:G:T	rs1929864	1	227195500	T	G	0.87563	intron_variant	MODIFIER	CDC42BPA	ENSG00000143776	protein_coding	-	33/35	-	-	-	-	-	rs1929864	-	-1	Ensembl	-	-	-	-	-	0.2674	0.267	0.2824	0.1567	0.4423	0.1912	-	-	-	-
13	previously not reported	ADCK3	1:227173477:C:G	1	227173477	G	C	1:227195728:C:T	rs1929863	1	227195728	C	T	0.853862	intron_variant	MODIFIER	CDC42BPA	ENSG00000143776	protein_coding	-	33/35	-	-	-	-	-	rs1929863	-	-1	Ensembl	-	-	-	-	-	0.272	0.2814	0.2853	0.1577	0.4414	0.1933	-	-	-	-
13	previously not reported	ADCK3	1:227173477:C:G	1	227173477	G	C	1:227195876:C:T	rs6426559	1	227195876	T	C	0.876609	intron_variant	MODIFIER	CDC42BPA	ENSG00000143776	protein_coding	-	33/35	-	-	-	-	-	rs6426559	-	-1	Ensembl	-	-	-	-	-	0.2672	0.267	0.2824	0.1567	0.4414	0.1912	-	-	-	-
13	previously not reported	ADCK3	1:227173477:C:G	1	227173477	G	C	1:227196048:A:C	rs6670924	1	227196048	A	C	0.876609	intron_variant	MODIFIER	CDC42BPA	ENSG00000143776	protein_coding	-	33/35	-	-	-	-	-	rs6670924	-	-1	Ensembl	-	-	-	-	-	0.2672	0.267	0.2824	0.1567	0.4414	0.1912	-	-	-	-
13	previously not reported	ADCK3	1:227173477:C:G	1	227173477	G	C	1:227196211:C:T	rs11588904	1	227196211	T	C	0.876609	intron_variant	MODIFIER	CDC42BPA	ENSG00000143776	protein_coding	-	33/35	-	-	-	-	-	rs11588904	-	-1	Ensembl	-	-	-	-	-	0.2672	0.267	0.2824	0.1567	0.4414	0.1912	-	-	-	-
13	previously not reported	ADCK3	1:227173477:C:G	1	227173477	G	C	1:227196502:C:G	rs12403236	1	227196502	C	G	0.830969	intron_variant	MODIFIER	CDC42BPA	ENSG00000143776	protein_coding	-	33/35	-	-	-	-	-	rs12403236	-	-1	Ensembl	-	-	-	-	-	0.2654	0.2602	0.2839	0.1567	0.4404	0.1912	-	-	-	-
13	previously not reported	ADCK3	1:227173477:C:G	1	227173477	G	C	1:227196949:A:T	rs12409755	1	227196949	A	T	0.87563	intron_variant	MODIFIER	CDC42BPA	ENSG00000143776	protein_coding	-	33/35	-	-	-	-	-	rs12409755	-	-1	Ensembl	-	-	-	-	-	0.2674	0.267	0.2839	0.1567	0.4414	0.1912	-	-	-	-
13	previously not reported	ADCK3	1:227173477:C:G	1	227173477	G	C	1:227197408:C:T	rs12410103	1	227197408	T	C	0.87563	intron_variant	MODIFIER	CDC42BPA	ENSG00000143776	protein_coding	-	33/35	-	-	-	-	-	rs12410103	-	-1	Ensembl	-	-	-	-	-	0.2674	0.267	0.2824	0.1567	0.4423	0.1912	-	-	-	-
13	previously not reported	ADCK3	1:227173477:C:G	1	227173477	G	C	1:227197411:C:T	rs61834001	1	227197411	C	T	0.87563	intron_variant	MODIFIER	CDC42BPA	ENSG00000143776	protein_coding	-	33/35	-	-	-	-	-	rs61834001	-	-1	Ensembl	-	-	-	-	-	0.2674	0.267	0.2824	0.1567	0.4423	0.1912	-	-	-	-
13	previously not reported	ADCK3	1:227173477:C:G	1	227173477	G	C	1:227197685:A:G	rs6693535	1	227197685	G	A	0.87563	intron_variant	MODIFIER	CDC42BPA	ENSG00000143776	protein_coding	-	33/35	-	-	-	-	-	rs6693535	-	-1	Ensembl	-	-	-	-	-	0.2674	0.267	0.2824	0.1567	0.4423	0.1912	-	-	-	-
13	previously not reported	ADCK3	1:227173477:C:G	1	227173477	G	C	1:227197875:A:G	rs6659424	1	227197875	A	G	0.874778	intron_variant	MODIFIER	CDC42BPA	ENSG00000143776	protein_coding	-	33/35	-	-	-	-	-	rs6659424	-	-1	Ensembl	-	-	-	-	-	0.2672	0.267	0.281	0.1567	0.4423	0.1912	-	-	-	-
13	previously not reported	ADCK3	1:227173477:C:G	1	227173477	G	C	1:227198434:D:I	rs10584341	1	227198434	I	A	0.852816	intron_variant	MODIFIER	CDC42BPA	ENSG00000143776	protein_coding	-	33/35	-	-	-	-	-	rs10584341	-	-1	Ensembl	-	-	-	-	-	0.2612	0.2458	0.281	0.1567	0.4404	0.1912	-	-	-	-
13	previously not reported	ADCK3	1:227173477:C:G	1	227173477	G	C	1:227203214:A:C	rs61834006	1	227203214	A	C	0.868165	intron_variant	MODIFIER	CDC42BPA	ENSG00000143776	protein_coding	-	33/35	-	-	-	-	-	rs61834006	-	-1	Ensembl	-	-	-	-	-	0.2686	0.267	0.2882	0.1587	0.4423	0.1912	-	-	-	-
14	previously not reported	SIPA1L2	1:232712145:A:G	1	232712145	A	G	1:232712145:A:G	rs1285678	1	232712145	A	G	1	intron_variant	MODIFIER	SIPA1L2	57568	protein_coding	-	1/23	-	-	-	-	-	rs1285678	-	-1	RefSeq	-	-	-	-	-	0.6312	0.5855	0.5663	0.8532	0.5477	0.5961	-	-	-	-
14	previously not reported	SIPA1L2	1:232712145:A:G	1	232712145	A	G	1:232712355:A:C	rs1285677	1	232712355	A	C	0.861772	intron_variant	MODIFIER	SIPA1L2	57568	protein_coding	-	1/23	-	-	-	-	-	rs1285677	-	-1	RefSeq	-	-	-	-	-	0.6635	0.6581	0.5793	0.8552	0.5557	0.6442	-	-	-	-
14	previously not reported	SIPA1L2	1:232712145:A:G	1	232712145	A	G	1:232712430:C:T	rs1285676	1	232712430	C	T	0.916979	intron_variant	MODIFIER	SIPA1L2	57568	protein_coding	-	1/23	-	-	-	-	-	rs1285676	-	-1	RefSeq	-	-	-	-	-	-	-	-	-	-	-	-	-	-	-
15	previously not reported	RYR2	1:237194922:A:G	1	237194922	A	G	1:237194922:A:G	rs10802580	1	237194922	A	G	1	regulatory_region_variant	MODIFIER	-	-	open_chromatin_region	-	-	-	-	-	-	-	rs10802580	-	-	-	-	-	-	-	-	0.7995	0.9849	0.6671	0.8988	0.7435	0.5982	-	-	-	-
16	previously not reported	SMYD3	1:246157144:A:G	1	246157144	G	A	1:246148910:G:T	rs10754492	1	246148910	G	T	0.966356	intron_variant	MODIFIER	SMYD3	ENSG00000185420	protein_coding	-	5/11	-	-	-	-	-	rs10754492	-	-1	Ensembl	-	-	-	-	-	0.3744	0.1225	0.5274	0.2381	0.6879	0.4243	-	-	-	-
16	previously not reported	SMYD3	1:246157144:A:G	1	246157144	G	A	1:246152864:C:T	rs10924423	1	246152864	T	C	0.960987	intron_variant	MODIFIER	SMYD3	ENSG00000185420	protein_coding	-	5/11	-	-	-	-	-	rs10924423	-	-1	Ensembl	-	-	-	-	-	0.3768	0.1286	0.5303	0.2371	0.6918	0.4233	-	-	-	-
16	previously not reported	SMYD3	1:246157144:A:G	1	246157144	G	A	1:246153034:A:G	rs10924424	1	246153034	G	A	0.961725	intron_variant	MODIFIER	SMYD3	ENSG00000185420	protein_coding	-	5/11	-	-	-	-	-	rs10924424	-	-1	Ensembl	-	-	-	-	-	0.377	0.1286	0.5303	0.2371	0.6918	0.4243	-	-	-	-
16	previously not reported	SMYD3	1:246157144:A:G	1	246157144	G	A	1:246153048:A:C	rs10924425	1	246153048	C	A	0.961725	intron_variant	MODIFIER	SMYD3	ENSG00000185420	protein_coding	-	5/11	-	-	-	-	-	rs10924425	-	-1	Ensembl	-	-	-	-	-	0.377	0.1286	0.5303	0.2371	0.6918	0.4243	-	-	-	-
16	previously not reported	SMYD3	1:246157144:A:G	1	246157144	G	A	1:246153301:A:G	rs4512612	1	246153301	G	A	0.961725	intron_variant	MODIFIER	SMYD3	ENSG00000185420	protein_coding	-	5/11	-	-	-	-	-	rs4512612	-	-1	Ensembl	-	-	-	-	-	0.377	0.1286	0.5303	0.2371	0.6918	0.4243	-	-	-	-
16	previously not reported	SMYD3	1:246157144:A:G	1	246157144	G	A	1:246153496:C:T	rs4600012	1	246153496	T	C	0.960965	intron_variant	MODIFIER	SMYD3	ENSG00000185420	protein_coding	-	5/11	-	-	-	-	-	rs4600012	-	-1	Ensembl	-	-	-	-	-	0.3768	0.1286	0.5303	0.2371	0.6909	0.4243	-	-	-	-
16	previously not reported	SMYD3	1:246157144:A:G	1	246157144	G	A	1:246153941:C:T	rs10802309	1	246153941	T	C	0.981328	intron_variant	MODIFIER	SMYD3	ENSG00000185420	protein_coding	-	5/11	-	-	-	-	-	rs10802309	-	-1	Ensembl	-	-	-	-	-	0.3718	0.1104	0.5274	0.2371	0.6918	0.4243	-	-	-	-
16	previously not reported	SMYD3	1:246157144:A:G	1	246157144	G	A	1:246154092:C:T	rs10924426	1	246154092	T	C	0.981328	intron_variant	MODIFIER	SMYD3	ENSG00000185420	protein_coding	-	5/11	-	-	-	-	-	rs10924426	-	-1	Ensembl	-	-	-	-	-	0.3718	0.1104	0.5274	0.2371	0.6918	0.4243	-	-	-	-
16	previously not reported	SMYD3	1:246157144:A:G	1	246157144	G	A	1:246154139:C:T	rs10924427	1	246154139	T	C	0.981328	intron_variant	MODIFIER	SMYD3	ENSG00000185420	protein_coding	-	5/11	-	-	-	-	-	rs10924427	-	-1	Ensembl	-	-	-	-	-	0.3718	0.1104	0.5274	0.2371	0.6918	0.4243	-	-	-	-
16	previously not reported	SMYD3	1:246157144:A:G	1	246157144	G	A	1:246154336:C:T	rs10924428	1	246154336	C	T	0.981328	intron_variant	MODIFIER	SMYD3	ENSG00000185420	protein_coding	-	5/11	-	-	-	-	-	rs10924428	-	-1	Ensembl	-	-	-	-	-	0.3718	0.1104	0.5274	0.2371	0.6918	0.4243	-	-	-	-
16	previously not reported	SMYD3	1:246157144:A:G	1	246157144	G	A	1:246154427:A:C	rs12120097	1	246154427	A	C	0.981328	intron_variant	MODIFIER	SMYD3	ENSG00000185420	protein_coding	-	5/11	-	-	-	-	-	rs12120097	-	-1	Ensembl	-	-	-	-	-	0.3718	0.1104	0.5274	0.2371	0.6918	0.4243	-	-	-	-
16	previously not reported	SMYD3	1:246157144:A:G	1	246157144	G	A	1:246154535:A:G	rs10924429	1	246154535	G	A	0.981328	intron_variant	MODIFIER	SMYD3	ENSG00000185420	protein_coding	-	5/11	-	-	-	-	-	rs10924429	-	-1	Ensembl	-	-	-	-	-	0.3718	0.1104	0.5274	0.2371	0.6918	0.4243	-	-	-	-
16	previously not reported	SMYD3	1:246157144:A:G	1	246157144	G	A	1:246154599:C:T	rs12116734	1	246154599	T	C	0.981328	intron_variant	MODIFIER	SMYD3	ENSG00000185420	protein_coding	-	5/11	-	-	-	-	-	rs12116734	-	-1	Ensembl	-	-	-	-	-	0.3718	0.1104	0.5274	0.2371	0.6918	0.4243	-	-	-	-
16	previously not reported	SMYD3	1:246157144:A:G	1	246157144	G	A	1:246154664:A:G	rs11578374	1	246154664	A	G	0.981328	intron_variant	MODIFIER	SMYD3	ENSG00000185420	protein_coding	-	5/11	-	-	-	-	-	rs11578374	-	-1	Ensembl	-	-	-	-	-	0.3718	0.1104	0.5274	0.2371	0.6918	0.4243	-	-	-	-
16	previously not reported	SMYD3	1:246157144:A:G	1	246157144	G	A	1:246155107:G:T	rs12117603	1	246155107	T	G	0.951477	intron_variant	MODIFIER	SMYD3	ENSG00000185420	protein_coding	-	5/11	-	-	-	-	-	rs12117603	-	-1	Ensembl	-	-	-	-	-	0.3632	0.1097	0.5144	0.2371	0.668	0.4151	-	-	-	-
16	previously not reported	SMYD3	1:246157144:A:G	1	246157144	G	A	1:246155112:A:G	rs12121035	1	246155112	A	G	0.951477	intron_variant	MODIFIER	SMYD3	ENSG00000185420	protein_coding	-	5/11	-	-	-	-	-	rs12121035	-	-1	Ensembl	-	-	-	-	-	0.3632	0.1097	0.5144	0.2371	0.668	0.4151	-	-	-	-
16	previously not reported	SMYD3	1:246157144:A:G	1	246157144	G	A	1:246155597:A:G	rs12143605	1	246155597	G	A	0.980586	intron_variant	MODIFIER	SMYD3	ENSG00000185420	protein_coding	-	5/11	-	-	-	-	-	rs12143605	-	-1	Ensembl	-	-	-	-	-	0.3716	0.1104	0.5274	0.2371	0.6918	0.4233	-	-	-	-
16	previously not reported	SMYD3	1:246157144:A:G	1	246157144	G	A	1:246156296:A:G	rs11579056	1	246156296	A	G	0.982015	intron_variant	MODIFIER	SMYD3	ENSG00000185420	protein_coding	-	5/11	-	-	-	-	-	rs11579056	-	-1	Ensembl	-	-	-	-	-	0.3716	0.1104	0.5274	0.2391	0.6889	0.4243	-	-	-	-
16	previously not reported	SMYD3	1:246157144:A:G	1	246157144	G	A	1:246156387:A:G	rs10924430	1	246156387	G	A	0.980503	intron_variant	MODIFIER	SMYD3	ENSG00000185420	protein_coding	-	5/11	-	-	-	-	-	rs10924430	-	-1	Ensembl	-	-	-	-	-	0.3704	0.1104	0.5274	0.2331	0.6889	0.4243	-	-	-	-
16	previously not reported	SMYD3	1:246157144:A:G	1	246157144	G	A	1:246156482:C:T	rs10924431	1	246156482	C	T	0.983439	intron_variant	MODIFIER	SMYD3	ENSG00000185420	protein_coding	-	5/11	-	-	-	-	-	rs10924431	-	-1	Ensembl	-	-	-	-	-	0.3712	0.1104	0.5274	0.2371	0.6889	0.4243	-	-	-	-
16	previously not reported	SMYD3	1:246157144:A:G	1	246157144	G	A	1:246156488:C:T	rs10924432	1	246156488	C	T	0.982022	intron_variant	MODIFIER	SMYD3	ENSG00000185420	protein_coding	-	5/11	-	-	-	-	-	rs10924432	-	-1	Ensembl	-	-	-	-	-	0.3716	0.1112	0.5274	0.2371	0.6889	0.4254	-	-	-	-
16	previously not reported	SMYD3	1:246157144:A:G	1	246157144	G	A	1:246156965:C:T	rs10924434	1	246156965	C	T	0.837745	intron_variant	MODIFIER	SMYD3	ENSG00000185420	protein_coding	-	5/11	-	-	-	-	-	rs10924434	-	-1	Ensembl	-	-	-	-	-	0.4149	0.1029	0.6037	0.246	0.7406	0.5419	-	-	-	-
16	previously not reported	SMYD3	1:246157144:A:G	1	246157144	G	A	1:246157079:A:T	rs12095139	1	246157079	T	A	1	intron_variant	MODIFIER	SMYD3	ENSG00000185420	protein_coding	-	5/11	-	-	-	-	-	rs12095139	-	-1	Ensembl	-	-	-	-	-	0.367	0.0938	0.5274	0.2371	0.6889	0.4254	-	-	-	-
16	previously not reported	SMYD3	1:246157144:A:G	1	246157144	G	A	1:246157144:A:G	rs28468565	1	246157144	G	A	1	intron_variant	MODIFIER	SMYD3	ENSG00000185420	protein_coding	-	5/11	-	-	-	-	-	rs28468565	-	-1	Ensembl	-	-	-	-	-	0.367	0.0938	0.5274	0.2371	0.6889	0.4254	-	-	-	-
16	previously not reported	SMYD3	1:246157144:A:G	1	246157144	G	A	1:246157282:A:G	rs28445534	1	246157282	G	A	0.999274	intron_variant	MODIFIER	SMYD3	ENSG00000185420	protein_coding	-	5/11	-	-	-	-	-	rs28445534	-	-1	Ensembl	-	-	-	-	-	0.3668	0.0938	0.5274	0.2371	0.6879	0.4254	-	-	-	-
16	previously not reported	SMYD3	1:246157144:A:G	1	246157144	G	A	1:246157386:C:T	rs28360878	1	246157386	C	T	0.966517	intron_variant	MODIFIER	SMYD3	ENSG00000185420	protein_coding	-	5/11	-	-	-	-	-	rs28360878	-	-1	Ensembl	-	-	-	-	-	0.3576	0.0938	0.5231	0.2371	0.6511	0.4192	-	-	-	-
16	previously not reported	SMYD3	1:246157144:A:G	1	246157144	G	A	1:246157628:C:G	rs28556941	1	246157628	G	C	0.997101	intron_variant	MODIFIER	SMYD3	ENSG00000185420	protein_coding	-	5/11	-	-	-	-	-	rs28556941	-	-1	Ensembl	-	-	-	-	-	0.3662	0.0923	0.5274	0.2361	0.6889	0.4243	-	-	-	-
16	previously not reported	SMYD3	1:246157144:A:G	1	246157144	G	A	1:246157698:C:G	rs10802310	1	246157698	G	C	0.993496	intron_variant	MODIFIER	SMYD3	ENSG00000185420	protein_coding	-	5/11	-	-	-	-	-	rs10802310	-	-1	Ensembl	-	-	-	-	-	0.3684	0.0938	0.5274	0.244	0.6889	0.4254	-	-	-	-
16	previously not reported	SMYD3	1:246157144:A:G	1	246157144	G	A	1:246157722:C:T	rs10802311	1	246157722	C	T	0.958008	intron_variant	MODIFIER	SMYD3	ENSG00000185420	protein_coding	-	5/11	-	-	-	-	-	rs10802311	-	-1	Ensembl	-	-	-	-	-	0.3596	0.0855	0.5216	0.2262	0.6799	0.4233	-	-	-	-
16	previously not reported	SMYD3	1:246157144:A:G	1	246157144	G	A	1:246157723:A:G	rs10802312	1	246157723	A	G	0.959348	intron_variant	MODIFIER	SMYD3	ENSG00000185420	protein_coding	-	5/11	-	-	-	-	-	rs10802312	-	-1	Ensembl	-	-	-	-	-	0.36	0.0855	0.5216	0.2262	0.6809	0.4243	-	-	-	-
16	previously not reported	SMYD3	1:246157144:A:G	1	246157144	G	A	1:246157950:C:G	rs10802313	1	246157950	G	C	0.993496	intron_variant	MODIFIER	SMYD3	ENSG00000185420	protein_coding	-	5/11	-	-	-	-	-	rs10802313	-	-1	Ensembl	-	-	-	-	-	0.3684	0.0938	0.5274	0.244	0.6889	0.4254	-	-	-	-
16	previously not reported	SMYD3	1:246157144:A:G	1	246157144	G	A	1:246158182:A:T	rs10802314	1	246158182	A	T	0.96383	intron_variant	MODIFIER	SMYD3	ENSG00000185420	protein_coding	-	5/11	-	-	-	-	-	rs10802314	-	-1	Ensembl	-	-	-	-	-	0.3768	0.1241	0.5288	0.244	0.6899	0.4254	-	-	-	-
16	previously not reported	SMYD3	1:246157144:A:G	1	246157144	G	A	1:246158209:A:G	rs10924435	1	246158209	A	G	0.992775	intron_variant	MODIFIER	SMYD3	ENSG00000185420	protein_coding	-	5/11	-	-	-	-	-	rs10924435	-	-1	Ensembl	-	-	-	-	-	0.3686	0.0938	0.5274	0.245	0.6889	0.4254	-	-	-	-
16	previously not reported	SMYD3	1:246157144:A:G	1	246157144	G	A	1:246159525:C:T	rs10737781	1	246159525	C	T	0.992039	intron_variant	MODIFIER	SMYD3	ENSG00000185420	protein_coding	-	5/11	-	-	-	-	-	rs10737781	-	-1	Ensembl	-	-	-	-	-	0.368	0.0938	0.5259	0.244	0.6889	0.4243	-	-	-	-
16	previously not reported	SMYD3	1:246157144:A:G	1	246157144	G	A	1:246159654:C:T	rs10754493	1	246159654	C	T	0.990614	intron_variant	MODIFIER	SMYD3	ENSG00000185420	protein_coding	-	5/11	-	-	-	-	-	rs10754493	-	-1	Ensembl	-	-	-	-	-	0.3684	0.0938	0.5259	0.244	0.6909	0.4243	-	-	-	-
16	previously not reported	SMYD3	1:246157144:A:G	1	246157144	G	A	1:246160488:A:G	rs12094306	1	246160488	G	A	0.959721	intron_variant	MODIFIER	SMYD3	ENSG00000185420	protein_coding	-	5/11	-	-	-	-	-	rs12094306	-	-1	Ensembl	-	-	-	-	-	0.3776	0.1233	0.5303	0.245	0.6909	0.4274	-	-	-	-
16	previously not reported	SMYD3	1:246157144:A:G	1	246157144	G	A	1:246160533:A:G	rs36047166	1	246160533	A	G	0.960411	intron_variant	MODIFIER	SMYD3	ENSG00000185420	protein_coding	-	5/11	-	-	-	-	-	rs36047166	-	-1	Ensembl	-	-	-	-	-	0.3774	0.1233	0.5303	0.245	0.6909	0.4264	-	-	-	-
16	previously not reported	SMYD3	1:246157144:A:G	1	246157144	G	A	1:246160564:C:T	rs35354121	1	246160564	T	C	0.959721	intron_variant	MODIFIER	SMYD3	ENSG00000185420	protein_coding	-	5/11	-	-	-	-	-	rs35354121	-	-1	Ensembl	-	-	-	-	-	0.3776	0.1241	0.5303	0.245	0.6909	0.4264	-	-	-	-
16	previously not reported	SMYD3	1:246157144:A:G	1	246157144	G	A	1:246160612:A:G	rs36107675	1	246160612	A	G	0.952172	intron_variant	MODIFIER	SMYD3	ENSG00000185420	protein_coding	-	5/11	-	-	-	-	-	rs36107675	-	-1	Ensembl	-	-	-	-	-	0.3794	0.1301	0.5303	0.245	0.6909	0.4274	-	-	-	-
16	previously not reported	SMYD3	1:246157144:A:G	1	246157144	G	A	1:246161101:G:T	rs35099039	1	246161101	T	G	0.959675	intron_variant	MODIFIER	SMYD3	ENSG00000185420	protein_coding	-	5/11	-	-	-	-	-	rs35099039	-	-1	Ensembl	-	-	-	-	-	0.3772	0.1233	0.5288	0.245	0.6909	0.4264	-	-	-	-
16	previously not reported	SMYD3	1:246157144:A:G	1	246157144	G	A	1:246161494:C:T	rs12118500	1	246161494	T	C	0.958984	intron_variant	MODIFIER	SMYD3	ENSG00000185420	protein_coding	-	5/11	-	-	-	-	-	rs12118500	-	-1	Ensembl	-	-	-	-	-	0.3774	0.1241	0.5288	0.245	0.6909	0.4264	-	-	-	-
16	previously not reported	SMYD3	1:246157144:A:G	1	246157144	G	A	1:246162472:A:C	rs10802316	1	246162472	A	C	0.956753	intron_variant	MODIFIER	SMYD3	ENSG00000185420	protein_coding	-	5/11	-	-	-	-	-	rs10802316	-	-1	Ensembl	-	-	-	-	-	0.3768	0.1225	0.5274	0.244	0.6909	0.4274	-	-	-	-
16	previously not reported	SMYD3	1:246157144:A:G	1	246157144	G	A	1:246163381:C:T	rs12120498	1	246163381	T	C	0.980059	intron_variant	MODIFIER	SMYD3	ENSG00000185420	protein_coding	-	5/11	-	-	-	-	-	rs12120498	-	-1	Ensembl	-	-	-	-	-	0.371	0.0946	0.5317	0.244	0.6958	0.4274	-	-	-	-
16	previously not reported	SMYD3	1:246157144:A:G	1	246157144	G	A	1:246164839:D:I	rs150069389	1	246164839	D	I	0.971289	intron_variant	MODIFIER	SMYD3	ENSG00000185420	protein_coding	-	5/11	-	-	-	-	-	rs150069389	-	-1	Ensembl	-	-	-	-	-	0.3706	0.0946	0.5202	0.254	0.6909	0.4284	-	-	-	-
17	previously not reported	LINC01249	2:4824622:A:G	2	4824622	G	A	2:4824073:A:G	rs1470475	2	4824073	A	G	0.855555	intergenic_variant	MODIFIER	-	-	-	-	-	-	-	-	-	-	rs1470475	-	-	-	-	-	-	-	-	0.5925	0.4811	0.6441	0.495	0.667	0.7301	-	-	-	-
17	previously not reported	LINC01249	2:4824622:A:G	2	4824622	G	A	2:4824622:A:G	rs12616546	2	4824622	G	A	1	intergenic_variant	MODIFIER	-	-	-	-	-	-	-	-	-	-	rs12616546	-	-	-	-	-	-	-	-	0.625	0.6036	0.6484	0.4931	0.667	0.7301	-	-	-	-
17	previously not reported	LINC01249	2:4824622:A:G	2	4824622	G	A	2:4824982:G:T	rs11123575	2	4824982	T	G	0.974845	intergenic_variant	MODIFIER	-	-	-	-	-	-	-	-	-	-	rs11123575	-	-	-	-	-	-	-	-	0.6306	0.6127	0.6527	0.495	0.672	0.7362	-	-	-	-
17	previously not reported	LINC01249	2:4824622:A:G	2	4824622	G	A	2:4824992:C:T	rs11123576	2	4824992	T	C	0.972356	intergenic_variant	MODIFIER	-	-	-	-	-	-	-	-	-	-	rs11123576	-	-	-	-	-	-	-	-	0.6312	0.6127	0.6527	0.498	0.672	0.7362	-	-	-	-
17	previously not reported	LINC01249	2:4824622:A:G	2	4824622	G	A	2:4826705:A:G	rs17019847	2	4826705	A	G	0.989002	intergenic_variant	MODIFIER	-	-	-	-	-	-	-	-	-	-	rs17019847	-	-	-	-	-	-	-	-	0.6272	0.6044	0.6527	0.495	0.671	0.7311	-	-	-	-
17	previously not reported	LINC01249	2:4824622:A:G	2	4824622	G	A	2:4826828:C:G	rs17019849	2	4826828	G	C	0.989847	intergenic_variant	MODIFIER	-	-	-	-	-	-	-	-	-	-	rs17019849	-	-	-	-	-	-	-	-	0.627	0.6044	0.6527	0.494	0.671	0.7311	-	-	-	-
17	previously not reported	LINC01249	2:4824622:A:G	2	4824622	G	A	2:4826967:C:T	rs6749464	2	4826967	C	T	0.81278	intergenic_variant	MODIFIER	-	-	-	-	-	-	-	-	-	-	rs6749464	-	-	-	-	-	-	-	-	0.5837	0.444	0.6455	0.494	0.671	0.7311	-	-	-	-
18	previously not reported	STRN	2:37102249:A:G	2	37102249	A	G	2:37066018:G:T	rs1504	2	37066018	T	G	0.895431	downstream_gene_variant	MODIFIER	STRN	ENSG00000115808	protein_coding	-	-	-	-	-	-	-	rs1504	4765	-1	Ensembl	-	-	-	-	-	0.4539	0.3404	0.4337	0.5685	0.4543	0.5031	-	-	-	18647951
18	previously not reported	STRN	2:37102249:A:G	2	37102249	A	G	2:37067137:A:G	rs7600413	2	37067137	A	G	0.889741	downstream_gene_variant	MODIFIER	STRN	ENSG00000115808	protein_coding	-	-	-	-	-	-	-	rs7600413	3646	-1	Ensembl	-	-	-	-	-	0.4513	0.3404	0.4265	0.5675	0.4463	0.5041	-	-	-	-
18	previously not reported	STRN	2:37102249:A:G	2	37102249	A	G	2:37068428:C:T	rs711244	2	37068428	C	T	0.887082	downstream_gene_variant	MODIFIER	STRN	ENSG00000115808	protein_coding	-	-	-	-	-	-	-	rs711244	2355	-1	Ensembl	-	-	-	-	-	0.4323	0.3374	0.4006	0.5327	0.4324	0.4796	-	-	-	-
18	previously not reported	STRN	2:37102249:A:G	2	37102249	A	G	2:37078839:A:G	rs3770781	2	37078839	A	G	0.907337	intron_variant	MODIFIER	STRN	ENSG00000115808	protein_coding	-	15/17	-	-	-	-	-	rs3770781	-	-1	Ensembl	-	-	-	-	-	0.4525	0.3321	0.4323	0.5734	0.4473	0.5102	-	-	-	-
18	previously not reported	STRN	2:37102249:A:G	2	37102249	A	G	2:37079583:C:T	rs62132522	2	37079583	T	C	0.903954	intron_variant	MODIFIER	STRN	ENSG00000115808	protein_coding	-	15/17	-	-	-	-	-	rs62132522	-	-1	Ensembl	-	-	-	-	-	0.4473	0.3328	0.4265	0.5714	0.4334	0.5031	-	-	-	-
18	previously not reported	STRN	2:37102249:A:G	2	37102249	A	G	2:37081212:D:I	rs5830444	2	37081212	D	I	0.908343	intron_variant	MODIFIER	STRN	ENSG00000115808	protein_coding	-	15/17	-	-	-	-	-	rs5830444	-	-1	Ensembl	-	-	-	-	-	0.4527	0.3313	0.4352	0.5734	0.4473	0.5102	-	-	-	-
18	previously not reported	STRN	2:37102249:A:G	2	37102249	A	G	2:37095139:C:G	rs6752845	2	37095139	G	C	0.880745	intron_variant	MODIFIER	STRN	ENSG00000115808	protein_coding	-	11/17	-	-	-	-	-	rs6752845	-	-1	Ensembl	-	-	-	-	-	0.4401	0.3275	0.3991	0.5833	0.4324	0.4816	-	-	-	-
18	previously not reported	STRN	2:37102249:A:G	2	37102249	A	G	2:37097009:C:T	rs2110942	2	37097009	T	C	0.955285	intron_variant	MODIFIER	STRN	ENSG00000115808	protein_coding	-	10/17	-	-	-	-	-	rs2110942	-	-1	Ensembl	-	-	-	-	-	0.4369	0.32	0.402	0.5446	0.4404	0.5051	-	-	-	-
18	previously not reported	STRN	2:37102249:A:G	2	37102249	A	G	2:37102249:A:G	rs17496249	2	37102249	A	G	1	intron_variant	MODIFIER	STRN	ENSG00000115808	protein_coding	-	10/17	-	-	-	-	-	rs17496249	-	-1	Ensembl	-	-	-	-	-	0.4399	0.3139	0.4207	0.5407	0.4503	0.5092	-	-	-	-
18	previously not reported	STRN	2:37102249:A:G	2	37102249	A	G	2:37117073:C:T	rs888083	2	37117073	C	T	0.861126	intron_variant	MODIFIER	STRN	ENSG00000115808	protein_coding	-	7/17	-	-	-	-	-	rs888083	-	-1	Ensembl	-	-	-	-	-	0.4203	0.3026	0.3963	0.5357	0.4264	0.4714	-	-	-	-
18	previously not reported	STRN	2:37102249:A:G	2	37102249	A	G	2:37117502:C:G	rs17443495	2	37117502	G	C	0.877844	intron_variant	MODIFIER	STRN	ENSG00000115808	protein_coding	-	7/17	-	-	-	-	-	rs17443495	-	-1	Ensembl	-	-	-	-	-	0.4249	0.3026	0.4035	0.5357	0.4284	0.4877	-	-	-	-
18	previously not reported	STRN	2:37102249:A:G	2	37102249	A	G	2:37150531:C:T	rs11681167	2	37150531	T	C	0.82676	intron_variant	MODIFIER	STRN	ENSG00000115808	protein_coding	-	2/17	-	-	-	-	-	rs11681167	-	-1	Ensembl	-	-	-	-	-	0.4393	0.3351	0.4179	0.5536	0.4334	0.4836	-	-	-	-
18	previously not reported	STRN	2:37102249:A:G	2	37102249	A	G	2:37150793:A:G	rs3770776	2	37150793	A	G	0.811942	intron_variant	MODIFIER	STRN	ENSG00000115808	protein_coding	-	2/17	-	-	-	-	-	rs3770776	-	-1	Ensembl	-	-	-	-	-	0.4373	0.3381	0.4164	0.5506	0.4284	0.4785	-	-	-	-
18	previously not reported	STRN	2:37102249:A:G	2	37102249	A	G	2:37152899:C:G	rs2372785	2	37152899	G	C	0.840009	intron_variant	MODIFIER	STRN	ENSG00000115808	protein_coding	-	1/17	-	-	-	-	-	rs2372785	-	-1	Ensembl	-	-	-	-	-	0.4301	0.3222	0.4121	0.5466	0.4264	0.4724	-	-	-	-
19	previously not reported	EML4	2:42537995:A:C	2	42537995	A	C	2:42537995:A:C	rs6728830	2	42537995	A	C	1	intron_variant	MODIFIER	EML4	ENSG00000143924	protein_coding	-	17/22	-	-	-	-	-	rs6728830	-	1	Ensembl	-	-	-	-	-	0.9481	0.9985	0.9885	0.8889	0.9702	0.8896	-	-	-	-
20	previously not reported	EPAS1	2:46533376:C:T	2	46533376	T	C	2:46533376:C:T	rs11894252	2	46533376	T	C	1	intron_variant	MODIFIER	EPAS1	ENSG00000116016	protein_coding	-	1/15	-	-	-	-	-	rs11894252	-	1	Ensembl	-	-	-	-	-	0.4289	0.3548	0.6311	0.1875	0.6153	0.4427	-	-	-	25945350,24157827,22010048,25827778,21131975,27225192,22113997
20	previously not reported	EPAS1	2:46533376:C:T	2	46533376	T	C	2:46533552:G:T	rs11684885	2	46533552	T	G	1	intron_variant	MODIFIER	EPAS1	ENSG00000116016	protein_coding	-	1/15	-	-	-	-	-	rs11684885	-	1	Ensembl	-	-	-	-	-	0.4289	0.3548	0.6311	0.1875	0.6153	0.4427	-	-	-	-
20	previously not reported	EPAS1	2:46533376:C:T	2	46533376	T	C	2:46534338:A:G	rs1867785	2	46534338	A	G	0.986041	intron_variant	MODIFIER	EPAS1	ENSG00000116016	protein_coding	-	1/15	-	-	-	-	-	rs1867785	-	1	Ensembl	-	-	-	-	-	0.4259	0.3442	0.6311	0.1875	0.6153	0.4417	-	-	-	18787502,19336370,22258127,21131975,24884370,24137339
20	previously not reported	EPAS1	2:46533376:C:T	2	46533376	T	C	2:46537604:A:G	rs7579899	2	46537604	A	G	0.976516	intron_variant	MODIFIER	EPAS1	ENSG00000116016	protein_coding	-	1/15	-	-	-	-	-	rs7579899	-	1	Ensembl	-	-	-	-	-	0.4257	0.3419	0.6311	0.1885	0.6163	0.4417	-	-	1	25945350,25827778,21131975,26551148,27225192,22113997,25826619,22131124,25053674,24137339,28123542
20	previously not reported	EPAS1	2:46533376:C:T	2	46533376	T	C	2:46541176:C:T	rs11689011	2	46541176	T	C	0.88868	intron_variant	MODIFIER	EPAS1	ENSG00000116016	protein_coding	-	1/15	-	-	-	-	-	rs11689011	-	1	Ensembl	-	-	-	-	-	0.4058	0.2897	0.6282	0.1677	0.6103	0.4397	-	-	-	24884370
21	previously not reported	FBXO11	2:48150587:C:T	2	48150587	C	T	2:48073877:D:I	rs146142156	2	48073877	I	T	0.80171	intron_variant	MODIFIER	FBXO11	ENSG00000138081	protein_coding	-	1/22	-	-	-	-	-	rs146142156	-	-1	Ensembl	-	-	-	-	-	0.0611	0.1225	0.0389	0	0.0606	0.0573	-	-	-	-
21	previously not reported	FBXO11	2:48150587:C:T	2	48150587	C	T	2:48143149:C:T	rs17037055	2	48143149	T	C	0.944092	intergenic_variant	MODIFIER	-	-	-	-	-	-	-	-	-	-	rs17037055	-	-	-	-	-	-	-	-	0.0649	0.1399	0.0403	0	0.0586	0.0542	-	-	-	-
21	previously not reported	FBXO11	2:48150587:C:T	2	48150587	C	T	2:48147589:C:T	rs17037064	2	48147589	T	C	0.938037	intergenic_variant	MODIFIER	-	-	-	-	-	-	-	-	-	-	rs17037064	-	-	-	-	-	-	-	-	0.0629	0.1331	0.0403	0	0.0586	0.0532	-	-	-	-
21	previously not reported	FBXO11	2:48150587:C:T	2	48150587	C	T	2:48150587:C:T	rs7588761	2	48150587	C	T	1	intergenic_variant	MODIFIER	-	-	-	-	-	-	-	-	-	-	rs7588761	-	-	-	-	-	-	-	-	0.0669	0.1377	0.0403	0	0.0596	0.0665	-	-	1	-
21	previously not reported	FBXO11	2:48150587:C:T	2	48150587	C	T	2:48151169:D:I	rs10671344	2	48151169	D	I	0.996878	intergenic_variant	MODIFIER	-	-	-	-	-	-	-	-	-	-	rs10671344	-	-	-	-	-	-	-	-	0.0667	0.1377	0.0403	0	0.0596	0.0654	-	-	-	-
21	previously not reported	FBXO11	2:48150587:C:T	2	48150587	C	T	2:48152292:C:T	rs113488881	2	48152292	T	C	0.944106	intergenic_variant	MODIFIER	-	-	-	-	-	-	-	-	-	-	rs113488881	-	-	-	-	-	-	-	-	0.0641	0.1377	0.0403	0	0.0586	0.0532	-	-	-	-
21	previously not reported	FBXO11	2:48150587:C:T	2	48150587	C	T	2:48152635:C:T	rs138545261	2	48152635	T	C	0.950359	intergenic_variant	MODIFIER	-	-	-	-	-	-	-	-	-	-	rs138545261	-	-	-	-	-	-	-	-	0.0637	0.1362	0.0403	0	0.0586	0.0532	-	-	-	-
21	previously not reported	FBXO11	2:48150587:C:T	2	48150587	C	T	2:48156376:D:I	rs137948116	2	48156376	D	I	0.944144	intergenic_variant	MODIFIER	-	-	-	-	-	-	-	-	-	-	rs137948116	-	-	-	-	-	-	-	-	0.0637	0.1369	0.0403	0	0.0577	0.0532	-	-	-	-
21	previously not reported	FBXO11	2:48150587:C:T	2	48150587	C	T	2:48158340:A:G	rs148524143	2	48158340	A	G	0.928735	intergenic_variant	MODIFIER	-	-	-	-	-	-	-	-	-	-	rs148524143	-	-	-	-	-	-	-	-	0.0631	0.1369	0.0403	0	0.0577	0.0501	-	-	-	-
21	previously not reported	FBXO11	2:48150587:C:T	2	48150587	C	T	2:48158547:D:I	rs199901865	2	48158547	D	I	0.925669	intergenic_variant	MODIFIER	-	-	-	-	-	-	-	-	-	-	rs199901865	-	-	-	-	-	-	-	-	0.0629	0.1362	0.0403	0	0.0577	0.0501	-	-	-	-
21	previously not reported	FBXO11	2:48150587:C:T	2	48150587	C	T	2:48159551:A:G	rs111876495	2	48159551	A	G	0.925669	intergenic_variant	MODIFIER	-	-	-	-	-	-	-	-	-	-	rs111876495	-	-	-	-	-	-	-	-	0.0629	0.1362	0.0403	0	0.0577	0.0501	-	-	-	-
22	previously not reported	SPTBN1	2:54824815:A:G	2	54824815	G	A	2:54788276:C:T	rs6545430	2	54788276	T	C	0.892778	intron_variant	MODIFIER	SPTBN1	ENSG00000115306	protein_coding	-	2/35	-	-	-	-	-	rs6545430	-	1	Ensembl	-	-	-	-	-	0.2943	0.677	0.1715	0.1042	0.1819	0.1759	-	-	-	-
22	previously not reported	SPTBN1	2:54824815:A:G	2	54824815	G	A	2:54789232:C:T	rs12713262	2	54789232	T	C	0.909039	intron_variant	MODIFIER	SPTBN1	ENSG00000115306	protein_coding	-	2/35	-	-	-	-	-	rs12713262	-	1	Ensembl	-	-	-	-	-	0.2927	0.6649	0.1729	0.1042	0.1889	0.1759	-	-	-	-
22	previously not reported	SPTBN1	2:54824815:A:G	2	54824815	G	A	2:54794639:D:I	rs33937060	2	54794639	I	G	0.934042	intron_variant	MODIFIER	SPTBN1	ENSG00000115306	protein_coding	-	2/35	-	-	-	-	-	rs33937060	-	1	Ensembl	-	-	-	-	-	0.2758	0.6157	0.1657	0.1002	0.1809	0.1728	-	-	-	-
22	previously not reported	SPTBN1	2:54824815:A:G	2	54824815	G	A	2:54795929:A:G	rs7602992	2	54795929	A	G	0.895867	intron_variant	MODIFIER	SPTBN1	ENSG00000115306	protein_coding	-	2/35	-	-	-	-	-	rs7602992	-	1	Ensembl	-	-	-	-	-	0.2965	0.6785	0.1744	0.1052	0.1899	0.1738	-	-	-	-
22	previously not reported	SPTBN1	2:54824815:A:G	2	54824815	G	A	2:54797798:C:T	rs6734445	2	54797798	C	T	0.889873	intron_variant	MODIFIER	SPTBN1	ENSG00000115306	protein_coding	-	2/35	-	-	-	-	-	rs6734445	-	1	Ensembl	-	-	-	-	-	0.2558	0.5446	0.1585	0.1012	0.1789	0.1728	-	-	1	19488044
22	previously not reported	SPTBN1	2:54824815:A:G	2	54824815	G	A	2:54798272:C:T	rs10166844	2	54798272	T	C	0.817955	intron_variant	MODIFIER	SPTBN1	ENSG00000115306	protein_coding	-	2/35	-	-	-	-	-	rs10166844	-	1	Ensembl	-	-	-	-	-	0.3093	0.6097	0.2579	0.1042	0.2177	0.2454	-	-	-	-
22	previously not reported	SPTBN1	2:54824815:A:G	2	54824815	G	A	2:54800128:G:T	rs13391803	2	54800128	T	G	0.816203	intron_variant	MODIFIER	SPTBN1	ENSG00000115306	protein_coding	-	2/35	-	-	-	-	-	rs13391803	-	1	Ensembl	-	-	-	-	-	0.2416	0.497	0.1427	0.1012	0.1819	0.1728	-	-	-	-
22	previously not reported	SPTBN1	2:54824815:A:G	2	54824815	G	A	2:54801065:D:I	rs10688458	2	54801065	D	I	0.820475	intron_variant	MODIFIER	SPTBN1	ENSG00000115306	protein_coding	-	2/35	-	-	-	-	-	rs10688458	-	1	Ensembl	-	-	-	-	-	0.3147	0.6241	0.2608	0.1052	0.2227	0.2454	-	-	-	-
22	previously not reported	SPTBN1	2:54824815:A:G	2	54824815	G	A	2:54801074:A:T	rs13407214	2	54801074	A	T	0.820475	intron_variant	MODIFIER	SPTBN1	ENSG00000115306	protein_coding	-	2/35	-	-	-	-	-	rs13407214	-	1	Ensembl	-	-	-	-	-	0.3147	0.6241	0.2608	0.1052	0.2227	0.2454	-	-	-	-
22	previously not reported	SPTBN1	2:54824815:A:G	2	54824815	G	A	2:54801591:A:T	rs4455200	2	54801591	T	A	0.822451	intron_variant	MODIFIER	SPTBN1	ENSG00000115306	protein_coding	-	2/35	-	-	-	-	-	rs4455200	-	1	Ensembl	-	-	-	-	-	0.3139	0.6233	0.2608	0.1062	0.2197	0.2444	-	-	-	-
22	previously not reported	SPTBN1	2:54824815:A:G	2	54824815	G	A	2:54801856:A:G	rs7599241	2	54801856	G	A	0.814111	intron_variant	MODIFIER	SPTBN1	ENSG00000115306	protein_coding	-	2/35	-	-	-	-	-	rs7599241	-	1	Ensembl	-	-	-	-	-	0.3117	0.6218	0.2579	0.1062	0.2127	0.2444	-	-	-	-
22	previously not reported	SPTBN1	2:54824815:A:G	2	54824815	G	A	2:54802206:C:T	rs4346422	2	54802206	T	C	0.820573	intron_variant	MODIFIER	SPTBN1	ENSG00000115306	protein_coding	-	2/35	-	-	-	-	-	rs4346422	-	1	Ensembl	-	-	-	-	-	0.3135	0.6225	0.2594	0.1062	0.2197	0.2444	-	-	-	-
22	previously not reported	SPTBN1	2:54824815:A:G	2	54824815	G	A	2:54802514:C:G	rs13386146	2	54802514	G	C	0.808343	intron_variant	MODIFIER	SPTBN1	ENSG00000115306	protein_coding	-	2/35	-	-	-	-	-	rs13386146	-	1	Ensembl	-	-	-	-	-	0.3101	0.6172	0.255	0.1062	0.2127	0.2444	-	-	-	-
22	previously not reported	SPTBN1	2:54824815:A:G	2	54824815	G	A	2:54803671:A:C	rs7340302	2	54803671	A	C	0.816175	intron_variant	MODIFIER	SPTBN1	ENSG00000115306	protein_coding	-	2/35	-	-	-	-	-	rs7340302	-	1	Ensembl	-	-	-	-	-	0.3125	0.6241	0.2594	0.1062	0.2127	0.2444	-	-	-	-
22	previously not reported	SPTBN1	2:54824815:A:G	2	54824815	G	A	2:54803816:C:T	rs10184128	2	54803816	T	C	0.822474	intron_variant	MODIFIER	SPTBN1	ENSG00000115306	protein_coding	-	2/35	-	-	-	-	-	rs10184128	-	1	Ensembl	-	-	-	-	-	0.3143	0.6248	0.2608	0.1062	0.2197	0.2444	-	-	-	-
22	previously not reported	SPTBN1	2:54824815:A:G	2	54824815	G	A	2:54805069:D:I	rs66622084	2	54805069	I	A	0.816686	intron_variant	MODIFIER	SPTBN1	ENSG00000115306	protein_coding	-	2/35	-	-	-	-	-	rs66622084	-	1	Ensembl	-	-	-	-	-	0.3113	0.6195	0.2579	0.1071	0.2127	0.2444	-	-	-	-
22	previously not reported	SPTBN1	2:54824815:A:G	2	54824815	G	A	2:54805218:A:C	rs12713264	2	54805218	C	A	0.81733	intron_variant	MODIFIER	SPTBN1	ENSG00000115306	protein_coding	-	2/35	-	-	-	-	-	rs12713264	-	1	Ensembl	-	-	-	-	-	0.3111	0.6195	0.2579	0.1062	0.2127	0.2444	-	-	-	-
22	previously not reported	SPTBN1	2:54824815:A:G	2	54824815	G	A	2:54805409:C:T	rs12713265	2	54805409	C	T	0.819195	intron_variant	MODIFIER	SPTBN1	ENSG00000115306	protein_coding	-	2/35	-	-	-	-	-	rs12713265	-	1	Ensembl	-	-	-	-	-	0.3115	0.6203	0.2594	0.1062	0.2127	0.2444	-	-	-	-
22	previously not reported	SPTBN1	2:54824815:A:G	2	54824815	G	A	2:54805443:G:T	rs12713266	2	54805443	G	T	0.819839	intron_variant	MODIFIER	SPTBN1	ENSG00000115306	protein_coding	-	2/35	-	-	-	-	-	rs12713266	-	1	Ensembl	-	-	-	-	-	0.3113	0.6203	0.2594	0.1062	0.2127	0.2434	-	-	-	-
22	previously not reported	SPTBN1	2:54824815:A:G	2	54824815	G	A	2:54805587:C:T	rs11902987	2	54805587	C	T	0.829712	intron_variant	MODIFIER	SPTBN1	ENSG00000115306	protein_coding	-	2/35	-	-	-	-	-	rs11902987	-	1	Ensembl	-	-	-	-	-	0.3113	0.615	0.2594	0.1062	0.2197	0.2434	-	-	-	-
22	previously not reported	SPTBN1	2:54824815:A:G	2	54824815	G	A	2:54805607:C:T	rs12713267	2	54805607	T	C	0.818741	intron_variant	MODIFIER	SPTBN1	ENSG00000115306	protein_coding	-	2/35	-	-	-	-	-	rs12713267	-	1	Ensembl	-	-	-	-	-	0.3117	0.6218	0.2594	0.1062	0.2127	0.2434	-	-	-	-
22	previously not reported	SPTBN1	2:54824815:A:G	2	54824815	G	A	2:54805749:A:G	rs13403284	2	54805749	A	G	0.819579	intron_variant	MODIFIER	SPTBN1	ENSG00000115306	protein_coding	-	2/35	-	-	-	-	-	rs13403284	-	1	Ensembl	-	-	-	-	-	0.3119	0.6218	0.2594	0.1062	0.2127	0.2444	-	-	-	-
22	previously not reported	SPTBN1	2:54824815:A:G	2	54824815	G	A	2:54805776:A:G	rs11892443	2	54805776	A	G	0.819127	intron_variant	MODIFIER	SPTBN1	ENSG00000115306	protein_coding	-	2/35	-	-	-	-	-	rs11892443	-	1	Ensembl	-	-	-	-	-	0.3121	0.6225	0.2594	0.1062	0.2127	0.2444	-	-	-	-
22	previously not reported	SPTBN1	2:54824815:A:G	2	54824815	G	A	2:54805854:C:T	rs13391522	2	54805854	T	C	0.820034	intron_variant	MODIFIER	SPTBN1	ENSG00000115306	protein_coding	-	2/35	-	-	-	-	-	rs13391522	-	1	Ensembl	-	-	-	-	-	0.3117	0.6203	0.2594	0.1062	0.2127	0.2454	-	-	-	-
22	previously not reported	SPTBN1	2:54824815:A:G	2	54824815	G	A	2:54806047:A:G	rs10208219	2	54806047	G	A	0.811566	intron_variant	MODIFIER	SPTBN1	ENSG00000115306	protein_coding	-	2/35	-	-	-	-	-	rs10208219	-	1	Ensembl	-	-	-	-	-	0.3095	0.6142	0.2565	0.1062	0.2127	0.2444	-	-	-	-
22	previously not reported	SPTBN1	2:54824815:A:G	2	54824815	G	A	2:54806049:A:G	rs10208225	2	54806049	G	A	0.811566	intron_variant	MODIFIER	SPTBN1	ENSG00000115306	protein_coding	-	2/35	-	-	-	-	-	rs10208225	-	1	Ensembl	-	-	-	-	-	0.3095	0.6142	0.2565	0.1062	0.2127	0.2444	-	-	-	-
22	previously not reported	SPTBN1	2:54824815:A:G	2	54824815	G	A	2:54806712:A:G	rs59667887	2	54806712	G	A	0.972347	intron_variant	MODIFIER	SPTBN1	ENSG00000115306	protein_coding	-	2/35	-	-	-	-	-	rs59667887	-	1	Ensembl	-	-	-	-	-	0.2722	0.5961	0.1614	0.1022	0.1899	0.1728	-	-	-	-
22	previously not reported	SPTBN1	2:54824815:A:G	2	54824815	G	A	2:54808191:C:T	rs10170066	2	54808191	C	T	0.85531	intron_variant	MODIFIER	SPTBN1	ENSG00000115306	protein_coding	-	2/35	-	-	-	-	-	rs10170066	-	1	Ensembl	-	-	-	-	-	0.2997	0.6074	0.255	0.1071	0.2207	0.1953	-	-	-	-
22	previously not reported	SPTBN1	2:54824815:A:G	2	54824815	G	A	2:54813546:A:G	rs10210502	2	54813546	A	G	0.975704	intron_variant	MODIFIER	SPTBN1	ENSG00000115306	protein_coding	-	2/35	-	-	-	-	-	rs10210502	-	1	Ensembl	-	-	-	-	-	0.271	0.5946	0.1614	0.1022	0.1879	0.1708	-	-	-	-
22	previously not reported	SPTBN1	2:54824815:A:G	2	54824815	G	A	2:54818895:C:T	rs7584223	2	54818895	T	C	0.873148	intron_variant	MODIFIER	SPTBN1	ENSG00000115306	protein_coding	-	2/35	-	-	-	-	-	rs7584223	-	1	Ensembl	-	-	-	-	-	0.3017	0.7042	0.1744	0.1022	0.1879	0.1708	-	-	-	-
22	previously not reported	SPTBN1	2:54824815:A:G	2	54824815	G	A	2:54823130:D:I	rs11277978	2	54823130	I	C	0.994941	intron_variant	MODIFIER	SPTBN1	ENSG00000115306	protein_coding	-	2/35	-	-	-	-	-	rs11277978	-	1	Ensembl	-	-	-	-	-	0.2712	0.5938	0.1657	0.1022	0.1879	0.1697	-	-	-	-
22	previously not reported	SPTBN1	2:54824815:A:G	2	54824815	G	A	2:54824396:A:G	rs4577321	2	54824396	A	G	0.997464	intron_variant	MODIFIER	SPTBN1	ENSG00000115306	protein_coding	-	2/35	-	-	-	-	-	rs4577321	-	1	Ensembl	-	-	-	-	-	0.2714	0.593	0.1657	0.1022	0.1879	0.1718	-	-	-	-
22	previously not reported	SPTBN1	2:54824815:A:G	2	54824815	G	A	2:54824815:A:G	rs4519566	2	54824815	G	A	1	intron_variant	MODIFIER	SPTBN1	ENSG00000115306	protein_coding	-	2/35	-	-	-	-	-	rs4519566	-	1	Ensembl	-	-	-	-	-	0.2708	0.5908	0.1657	0.1022	0.1879	0.1718	-	-	-	-
22	previously not reported	SPTBN1	2:54824815:A:G	2	54824815	G	A	2:54845117:G:T	rs12713273	2	54845117	T	G	0.805539	intron_variant	MODIFIER	SPTBN1	ENSG00000115306	protein_coding	-	6/35	-	-	-	-	-	rs12713273	-	1	Ensembl	-	-	-	-	-	0.231	0.4607	0.1383	0.1012	0.1809	0.1718	-	-	-	-
23	previously not reported	LINC01812 - C1D	2:68079211:A:G	2	68079211	G	A	2:68077707:A:G	rs2861754	2	68077707	G	A	0.988713	intergenic_variant	MODIFIER	-	-	-	-	-	-	-	-	-	-	rs2861754	-	-	-	-	-	-	-	-	0.3944	0.407	0.2752	0.4891	0.339	0.4213	-	-	-	-
23	previously not reported	LINC01812 - C1D	2:68079211:A:G	2	68079211	G	A	2:68077744:C:T	rs2861755	2	68077744	C	T	0.989511	intergenic_variant	MODIFIER	-	-	-	-	-	-	-	-	-	-	rs2861755	-	-	-	-	-	-	-	-	0.3946	0.407	0.2752	0.4901	0.339	0.4213	-	-	-	-
23	previously not reported	LINC01812 - C1D	2:68079211:A:G	2	68079211	G	A	2:68079211:A:G	rs7584373	2	68079211	G	A	1	intergenic_variant	MODIFIER	-	-	-	-	-	-	-	-	-	-	rs7584373	-	-	-	-	-	-	-	-	0.3968	0.4092	0.2767	0.4891	0.3439	0.4243	-	-	-	-
23	previously not reported	LINC01812 - C1D	2:68079211:A:G	2	68079211	G	A	2:68081340:C:T	rs745976	2	68081340	T	C	0.832878	intergenic_variant	MODIFIER	-	-	-	-	-	-	-	-	-	-	rs745976	-	-	-	-	-	-	-	-	0.4377	0.5393	0.2853	0.5119	0.3449	0.4274	-	-	-	-
24	previously not reported	FHL2 - LOC285000	2:106104856:C:T	2	106104856	T	C	2:106104856:C:T	rs13006682	2	106104856	T	C	1	intergenic_variant	MODIFIER	-	-	-	-	-	-	-	-	-	-	rs13006682	-	-	-	-	-	-	-	-	0.2582	0.2852	0.3732	0.1716	0.3062	0.18	-	-	-	-
25	previously not reported	NCKAP5	2:134326085:A:C	2	134326085	C	A	2:134320856:G:T	rs78149397	2	134320856	G	T	0.819074	intron_variant	MODIFIER	NCKAP5	ENSG00000176771	protein_coding	-	1/19	-	-	-	-	-	rs78149397	-	-1	Ensembl	-	-	-	-	-	0.0162	0.0015	0.0173	0	0.0477	0.0194	-	-	-	-
25	previously not reported	NCKAP5	2:134326085:A:C	2	134326085	C	A	2:134326085:A:C	rs17816356	2	134326085	C	A	1	upstream_gene_variant	MODIFIER	NCKAP5	ENSG00000176771	protein_coding	-	-	-	-	-	-	-	rs17816356	54	-1	Ensembl	-	-	-	-	-	0.0132	0.0008	0.0115	0	0.0388	0.0184	-	-	-	-
26	previously not reported	TEX41	2:145453968:A:G	2	145453968	A	G	2:145453968:A:G	rs76909456	2	145453968	A	G	1	intron_variant,non_coding_transcript_variant	MODIFIER	TEX41	401014	misc_RNA	-	1/4	-	-	-	-	-	rs76909456	-	1	RefSeq	-	-	-	-	-	0.1144	0.0083	0.1628	0.0208	0.2575	0.1728	-	-	-	-
27	previously not reported	LINC01473 - ZC3H15	2:187033804:A:G	2	187033804	A	G	2:186819257:A:T	rs76466105	2	186819257	T	A	0.831667	downstream_gene_variant	MODIFIER	RPL21P32	ENSG00000224019	processed_pseudogene	-	-	-	-	-	-	-	rs76466105	2057	-1	Ensembl	-	-	-	-	-	0.0104	0.0008	0.0115	0	0.0348	0.0082	-	-	-	-
27	previously not reported	LINC01473 - ZC3H15	2:187033804:A:G	2	187033804	A	G	2:187033804:A:G	rs138711926	2	187033804	A	G	1	intergenic_variant	MODIFIER	-	-	-	-	-	-	-	-	-	-	rs138711926	-	-	-	-	-	-	-	-	0.0098	0.0008	0.0101	0	0.0328	0.0082	-	-	-	-
27	previously not reported	LINC01473 - ZC3H15	2:187033804:A:G	2	187033804	A	G	2:187216210:C:T	rs76603104	2	187216210	T	C	0.877014	downstream_gene_variant	MODIFIER	RP11-410E4.1	ENSG00000259915	lincRNA	-	-	-	-	-	-	-	rs76603104	3089	-1	Ensembl	-	-	-	-	-	0.0094	0.0008	0.0086	0	0.0308	0.0092	-	-	-	-
28	previously not reported	SDPR	2:192723128:A:T	2	192723128	T	A	2:192723128:A:T	rs58577564	2	192723128	T	A	1	intron_variant,non_coding_transcript_variant	MODIFIER	AC098617.1	ENSG00000233766	antisense	-	1/2	-	-	-	-	-	rs58577564	-	1	Ensembl	-	-	-	-	-	0.151	0.1694	0.121	0.2212	0.0726	0.1554	-	-	-	-
28	previously not reported	SDPR	2:192723128:A:T	2	192723128	T	A	2:192723817:A:G	rs72912375	2	192723817	G	A	0.924689	intron_variant,non_coding_transcript_variant	MODIFIER	AC098617.1	ENSG00000233766	antisense	-	1/2	-	-	-	-	-	rs72912375	-	1	Ensembl	-	-	-	-	-	0.142	0.1377	0.1153	0.2202	0.0746	0.1554	-	-	-	-
28	previously not reported	SDPR	2:192723128:A:T	2	192723128	T	A	2:192723820:A:T	rs72912376	2	192723820	A	T	0.924689	intron_variant,non_coding_transcript_variant	MODIFIER	AC098617.1	ENSG00000233766	antisense	-	1/2	-	-	-	-	-	rs72912376	-	1	Ensembl	-	-	-	-	-	0.142	0.1377	0.1153	0.2202	0.0746	0.1554	-	-	-	-
28	previously not reported	SDPR	2:192723128:A:T	2	192723128	T	A	2:192723897:C:T	rs78598566	2	192723897	C	T	0.865251	intron_variant,non_coding_transcript_variant	MODIFIER	AC098617.1	ENSG00000233766	antisense	-	1/2	-	-	-	-	-	rs78598566	-	1	Ensembl	-	-	-	-	-	0.1494	0.1641	0.1182	0.2192	0.0746	0.1564	-	-	-	-
28	previously not reported	SDPR	2:192723128:A:T	2	192723128	T	A	2:192723915:C:T	rs80264811	2	192723915	C	T	0.921784	intron_variant,non_coding_transcript_variant	MODIFIER	AC098617.1	ENSG00000233766	antisense	-	1/2	-	-	-	-	-	rs80264811	-	1	Ensembl	-	-	-	-	-	0.1416	0.1377	0.1138	0.2192	0.0746	0.1554	-	-	-	-
28	previously not reported	SDPR	2:192723128:A:T	2	192723128	T	A	2:192724126:C:T	rs67758482	2	192724126	T	C	0.924689	intron_variant,non_coding_transcript_variant	MODIFIER	AC098617.1	ENSG00000233766	antisense	-	1/2	-	-	-	-	-	rs67758482	-	1	Ensembl	-	-	-	-	-	0.142	0.1377	0.1153	0.2202	0.0746	0.1554	-	-	-	-
28	previously not reported	SDPR	2:192723128:A:T	2	192723128	T	A	2:192724233:C:T	rs56303926	2	192724233	C	T	0.924689	intron_variant,non_coding_transcript_variant	MODIFIER	AC098617.1	ENSG00000233766	antisense	-	1/2	-	-	-	-	-	rs56303926	-	1	Ensembl	-	-	-	-	-	0.142	0.1377	0.1153	0.2202	0.0746	0.1554	-	-	-	-
28	previously not reported	SDPR	2:192723128:A:T	2	192723128	T	A	2:192725110:A:G	rs66807971	2	192725110	G	A	0.920185	intron_variant,non_coding_transcript_variant	MODIFIER	AC098617.1	ENSG00000233766	antisense	-	1/2	-	-	-	-	-	rs66807971	-	1	Ensembl	-	-	-	-	-	0.1422	0.1399	0.1153	0.2202	0.0726	0.1554	-	-	-	-
28	previously not reported	SDPR	2:192723128:A:T	2	192723128	T	A	2:192725337:A:C	rs67370091	2	192725337	A	C	0.921625	intron_variant,non_coding_transcript_variant	MODIFIER	AC098617.1	ENSG00000233766	antisense	-	1/2	-	-	-	-	-	rs67370091	-	1	Ensembl	-	-	-	-	-	0.1424	0.1377	0.1153	0.2222	0.0746	0.1554	-	-	-	-
28	previously not reported	SDPR	2:192723128:A:T	2	192723128	T	A	2:192725448:C:T	rs72912381	2	192725448	C	T	0.904336	intron_variant,non_coding_transcript_variant	MODIFIER	AC098617.1	ENSG00000233766	antisense	-	1/2	-	-	-	-	-	rs72912381	-	1	Ensembl	-	-	-	-	-	0.1404	0.1301	0.1138	0.2222	0.0746	0.1564	-	-	-	-
28	previously not reported	SDPR	2:192723128:A:T	2	192723128	T	A	2:192725908:C:T	rs72912383	2	192725908	C	T	0.902862	intron_variant,non_coding_transcript_variant	MODIFIER	AC098617.1	ENSG00000233766	antisense	-	1/2	-	-	-	-	-	rs72912383	-	1	Ensembl	-	-	-	-	-	-	-	-	-	-	-	-	-	-	-
29	previously not reported*	BMPR2	2:203373030:A:G	2	203373030	A	G	2:203210029:A:G	rs6435145	2	203210029	G	A	0.919786	intergenic_variant	MODIFIER	-	-	-	-	-	-	-	-	-	-	rs6435145	-	-	-	-	-	-	-	-	0.4683	0.6989	0.4957	0.1766	0.4732	0.4325	-	-	-	-
29	previously not reported*	BMPR2	2:203373030:A:G	2	203373030	A	G	2:203211385:C:T	rs10165082	2	203211385	T	C	0.923652	intergenic_variant	MODIFIER	-	-	-	-	-	-	-	-	-	-	rs10165082	-	-	-	-	-	-	-	-	0.4684	0.6989	0.4957	0.1766	0.4742	0.4325	-	-	-	-
29	previously not reported*	BMPR2	2:203373030:A:G	2	203373030	A	G	2:203212229:A:C	rs6435146	2	203212229	A	C	0.923652	intergenic_variant	MODIFIER	-	-	-	-	-	-	-	-	-	-	rs6435146	-	-	-	-	-	-	-	-	0.4684	0.6989	0.4957	0.1766	0.4742	0.4325	-	-	-	-
29	previously not reported*	BMPR2	2:203373030:A:G	2	203373030	A	G	2:203214451:C:T	rs59036261	2	203214451	T	C	0.919757	intergenic_variant	MODIFIER	-	-	-	-	-	-	-	-	-	-	rs59036261	-	-	-	-	-	-	-	-	0.4319	0.562	0.4856	0.1806	0.4751	0.4325	-	-	-	-
29	previously not reported*	BMPR2	2:203373030:A:G	2	203373030	A	G	2:203221574:A:G	rs6435147	2	203221574	A	G	0.931485	downstream_gene_variant	MODIFIER	RN7SL40P	ENSG00000242696	misc_RNA	-	-	-	-	-	-	-	rs6435147	270	-1	Ensembl	-	-	-	-	-	0.4381	0.5923	0.487	0.1786	0.4722	0.4274	-	-	-	-
29	previously not reported*	BMPR2	2:203373030:A:G	2	203373030	A	G	2:203224222:C:G	rs6748618	2	203224222	G	C	0.946286	upstream_gene_variant	MODIFIER	RN7SL40P	ENSG00000242696	misc_RNA	-	-	-	-	-	-	-	rs6748618	2082	-1	Ensembl	-	-	-	-	-	0.4365	0.5968	0.4885	0.1776	0.4781	0.407	-	-	-	-
29	previously not reported*	BMPR2	2:203373030:A:G	2	203373030	A	G	2:203230742:A:G	rs7576387	2	203230742	A	G	0.976774	intergenic_variant	MODIFIER	-	-	-	-	-	-	-	-	-	-	rs7576387	-	-	-	-	-	-	-	-	0.4527	0.6415	0.4914	0.1766	0.4722	0.4346	-	-	-	-
29	previously not reported*	BMPR2	2:203373030:A:G	2	203373030	A	G	2:203251506:C:T	rs6435148	2	203251506	T	C	0.988342	intron_variant	MODIFIER	BMPR2	ENSG00000204217	protein_coding	-	1/12	-	-	-	-	-	rs6435148	-	1	Ensembl	-	-	-	-	-	0.4565	0.6467	0.4971	0.1825	0.4751	0.4335	-	-	-	-
29	previously not reported*	BMPR2	2:203373030:A:G	2	203373030	A	G	2:203254723:D:I	rs59969821	2	203254723	I	C	0.93112	intron_variant	MODIFIER	BMPR2	ENSG00000204217	protein_coding	-	1/12	-	-	-	-	-	rs59969821	-	1	Ensembl	-	-	-	-	-	0.4712	0.6309	0.4971	0.244	0.4881	0.454	-	-	-	-
29	previously not reported*	BMPR2	2:203373030:A:G	2	203373030	A	G	2:203264977:A:G	rs7573030	2	203264977	A	G	0.992229	intron_variant	MODIFIER	BMPR2	ENSG00000204217	protein_coding	-	1/12	-	-	-	-	-	rs7573030	-	1	Ensembl	-	-	-	-	-	0.4569	0.6467	0.4971	0.1815	0.4761	0.4356	-	-	-	-
29	previously not reported*	BMPR2	2:203373030:A:G	2	203373030	A	G	2:203273559:A:G	rs7583801	2	203273559	A	G	0.988342	intron_variant	MODIFIER	BMPR2	ENSG00000204217	protein_coding	-	1/12	-	-	-	-	-	rs7583801	-	1	Ensembl	-	-	-	-	-	0.4569	0.6475	0.4971	0.1815	0.4751	0.4356	-	-	-	-
29	previously not reported*	BMPR2	2:203373030:A:G	2	203373030	A	G	2:203273885:C:T	rs1969282	2	203273885	C	T	0.988342	intron_variant	MODIFIER	BMPR2	ENSG00000204217	protein_coding	-	1/12	-	-	-	-	-	rs1969282	-	1	Ensembl	-	-	-	-	-	0.4557	0.6437	0.4942	0.1815	0.4751	0.4366	-	-	-	-
29	previously not reported*	BMPR2	2:203373030:A:G	2	203373030	A	G	2:203274963:C:T	rs2350806	2	203274963	T	C	0.992229	intron_variant	MODIFIER	BMPR2	ENSG00000204217	protein_coding	-	1/12	-	-	-	-	-	rs2350806	-	1	Ensembl	-	-	-	-	-	0.4573	0.649	0.4957	0.1815	0.4761	0.4356	-	-	-	-
29	previously not reported*	BMPR2	2:203373030:A:G	2	203373030	A	G	2:203279702:C:G	rs7582681	2	203279702	C	G	0.992262	intron_variant	MODIFIER	BMPR2	ENSG00000204217	protein_coding	-	1/12	-	-	-	-	-	rs7582681	-	1	Ensembl	-	-	-	-	-	0.4571	0.6475	0.4942	0.1815	0.4781	0.4356	-	-	-	-
29	previously not reported*	BMPR2	2:203373030:A:G	2	203373030	A	G	2:203284701:A:G	rs6732066	2	203284701	G	A	0.988345	intron_variant	MODIFIER	BMPR2	ENSG00000204217	protein_coding	-	1/12	-	-	-	-	-	rs6732066	-	1	Ensembl	-	-	-	-	-	0.4561	0.6437	0.4957	0.1815	0.4771	0.4356	-	-	-	-
29	previously not reported*	BMPR2	2:203373030:A:G	2	203373030	A	G	2:203285157:G:T	rs6747299	2	203285157	T	G	0.988345	intron_variant	MODIFIER	BMPR2	ENSG00000204217	protein_coding	-	1/12	-	-	-	-	-	rs6747299	-	1	Ensembl	-	-	-	-	-	0.4571	0.6475	0.4957	0.1815	0.4771	0.4356	-	-	-	22258127
29	previously not reported*	BMPR2	2:203373030:A:G	2	203373030	A	G	2:203291104:A:G	rs7558089	2	203291104	A	G	0.992229	intron_variant	MODIFIER	BMPR2	ENSG00000204217	protein_coding	-	1/12	-	-	-	-	-	rs7558089	-	1	Ensembl	-	-	-	-	-	0.4579	0.649	0.4986	0.1815	0.4761	0.4366	-	-	-	-
29	previously not reported*	BMPR2	2:203373030:A:G	2	203373030	A	G	2:203297068:G:T	rs13010656	2	203297068	T	G	0.996131	intron_variant	MODIFIER	BMPR2	ENSG00000204217	protein_coding	-	1/12	-	-	-	-	-	rs13010656	-	1	Ensembl	-	-	-	-	-	0.4369	0.5734	0.4914	0.1815	0.4771	0.4356	-	-	-	22258127
29	previously not reported*	BMPR2	2:203373030:A:G	2	203373030	A	G	2:203302660:A:G	rs12693969	2	203302660	A	G	0.992229	intron_variant	MODIFIER	BMPR2	ENSG00000204217	protein_coding	-	1/12	-	-	-	-	-	rs12693969	-	1	Ensembl	-	-	-	-	-	0.4393	0.5734	0.4885	0.1815	0.4761	0.4509	-	-	-	-
29	previously not reported*	BMPR2	2:203373030:A:G	2	203373030	A	G	2:203304475:C:T	rs10193172	2	203304475	C	T	0.988342	intron_variant	MODIFIER	BMPR2	ENSG00000204217	protein_coding	-	1/12	-	-	-	-	-	rs10193172	-	1	Ensembl	-	-	-	-	-	0.4347	0.5688	0.4885	0.1815	0.4751	0.4346	-	-	-	-
29	previously not reported*	BMPR2	2:203373030:A:G	2	203373030	A	G	2:203304750:C:G	rs12474015	2	203304750	C	G	0.992229	intron_variant	MODIFIER	BMPR2	ENSG00000204217	protein_coding	-	1/12	-	-	-	-	-	rs12474015	-	1	Ensembl	-	-	-	-	-	0.4353	0.5681	0.4885	0.1845	0.4761	0.4346	-	-	-	-
29	previously not reported*	BMPR2	2:203373030:A:G	2	203373030	A	G	2:203306153:C:T	rs7422693	2	203306153	T	C	0.996131	intron_variant	MODIFIER	BMPR2	ENSG00000204217	protein_coding	-	1/12	-	-	-	-	-	rs7422693	-	1	Ensembl	-	-	-	-	-	0.4403	0.5862	0.4885	0.1845	0.4771	0.4346	-	-	-	-
29	previously not reported*	BMPR2	2:203373030:A:G	2	203373030	A	G	2:203306327:A:G	rs7424404	2	203306327	A	G	0.992229	intron_variant	MODIFIER	BMPR2	ENSG00000204217	protein_coding	-	1/12	-	-	-	-	-	rs7424404	-	1	Ensembl	-	-	-	-	-	0.4367	0.5734	0.4885	0.1845	0.4761	0.4346	-	-	-	-
29	previously not reported*	BMPR2	2:203373030:A:G	2	203373030	A	G	2:203307477:C:T	rs6736794	2	203307477	T	C	0.996131	intron_variant	MODIFIER	BMPR2	ENSG00000204217	protein_coding	-	1/12	-	-	-	-	-	rs6736794	-	1	Ensembl	-	-	-	-	-	0.4359	0.587	0.4885	0.1617	0.4771	0.4346	-	-	-	-
29	previously not reported*	BMPR2	2:203373030:A:G	2	203373030	A	G	2:203311997:A:C	rs13422311	2	203311997	C	A	0.992229	intron_variant	MODIFIER	BMPR2	ENSG00000204217	protein_coding	-	1/12	-	-	-	-	-	rs13422311	-	1	Ensembl	-	-	-	-	-	0.4291	0.5643	0.4885	0.1587	0.4761	0.4346	-	-	-	-
29	previously not reported*	BMPR2	2:203373030:A:G	2	203373030	A	G	2:203352937:A:G	rs6751210	2	203352937	A	G	0.988385	intron_variant	MODIFIER	BMPR2	ENSG00000204217	protein_coding	-	3/12	-	-	-	-	-	rs6751210	-	1	Ensembl	-	-	-	-	-	0.4688	0.6505	0.4942	0.1994	0.4751	0.4765	-	-	-	21387313
29	previously not reported*	BMPR2	2:203373030:A:G	2	203373030	A	G	2:203373030:A:G	rs2103208	2	203373030	A	G	1	intron_variant	MODIFIER	BMPR2	ENSG00000204217	protein_coding	-	3/12	-	-	-	-	-	rs2103208	-	1	Ensembl	-	-	-	-	-	0.4595	0.6611	0.4885	0.1825	0.4761	0.4346	-	-	-	-
29	previously not reported*	BMPR2	2:203373030:A:G	2	203373030	A	G	2:203374805:C:T	rs7562876	2	203374805	C	T	1	intron_variant	MODIFIER	BMPR2	ENSG00000204217	protein_coding	-	3/12	-	-	-	-	-	rs7562876	-	1	Ensembl	-	-	-	-	-	0.4555	0.646	0.4885	0.1825	0.4761	0.4346	-	-	-	-
29	previously not reported*	BMPR2	2:203373030:A:G	2	203373030	A	G	2:203375701:C:T	rs12693970	2	203375701	T	C	1	intron_variant	MODIFIER	BMPR2	ENSG00000204217	protein_coding	-	3/12	-	-	-	-	-	rs12693970	-	1	Ensembl	-	-	-	-	-	0.4595	0.6611	0.4885	0.1825	0.4761	0.4346	-	-	-	-
29	previously not reported*	BMPR2	2:203373030:A:G	2	203373030	A	G	2:203377077:A:G	rs6748396	2	203377077	A	G	1	intron_variant	MODIFIER	BMPR2	ENSG00000204217	protein_coding	-	3/12	-	-	-	-	-	rs6748396	-	1	Ensembl	-	-	-	-	-	0.4559	0.646	0.4899	0.1835	0.4761	0.4346	-	-	-	-
29	previously not reported*	BMPR2	2:203373030:A:G	2	203373030	A	G	2:203396642:C:T	rs1199497	2	203396642	C	T	0.996115	intron_variant	MODIFIER	BMPR2	ENSG00000204217	protein_coding	-	8/12	-	-	-	-	-	rs1199497	-	1	Ensembl	-	-	-	-	-	0.5455	0.3585	0.5115	0.8165	0.5249	0.5644	-	-	-	-
29	previously not reported*	BMPR2	2:203373030:A:G	2	203373030	A	G	2:203430456:G:T	rs1048829	2	203430456	T	G	0.972949	3_prime_UTR_variant	MODIFIER	BMPR2	ENSG00000204217	protein_coding	13/13	-	9443	-	-	-	-	rs1048829	-	1	Ensembl	-	-	-	-	-	-	-	-	-	-	-	benign	-	1	27196063,27077124
29	previously not reported*	BMPR2	2:203373030:A:G	2	203373030	A	G	2:203441547:C:G	rs13006836	2	203441547	C	G	0.973704	intergenic_variant	MODIFIER	-	-	-	-	-	-	-	-	-	-	rs13006836	-	-	-	-	-	-	-	-	0.5423	0.357	0.5115	0.8175	0.5169	0.5573	-	-	-	-
30	previously not reported*	AC007563.5	2:217628087:C:T	2	217628087	C	T	2:217613285:C:T	rs8179795	2	217613285	C	T	0.947948	intron_variant,non_coding_transcript_variant	MODIFIER	AC007563.5	ENSG00000236886	antisense	-	2/3	-	-	-	-	-	rs8179795	-	1	Ensembl	-	-	-	-	-	0.7971	0.6392	0.8329	0.8284	0.8509	0.8978	-	-	-	-
30	previously not reported*	AC007563.5	2:217628087:C:T	2	217628087	C	T	2:217613623:C:T	rs6750186	2	217613623	C	T	0.947948	intron_variant,non_coding_transcript_variant	MODIFIER	AC007563.5	ENSG00000236886	antisense	-	2/3	-	-	-	-	-	rs6750186	-	1	Ensembl	-	-	-	-	-	0.7963	0.6369	0.8329	0.8274	0.8509	0.8978	-	-	-	-
30	previously not reported*	AC007563.5	2:217628087:C:T	2	217628087	C	T	2:217614083:C:T	rs6711608	2	217614083	T	C	0.955318	intron_variant,non_coding_transcript_variant	MODIFIER	AC007563.5	ENSG00000236886	antisense	-	2/3	-	-	-	-	-	rs6711608	-	1	Ensembl	-	-	-	-	-	0.8546	0.8495	0.8458	0.8284	0.8519	0.8978	-	-	-	-
30	previously not reported*	AC007563.5	2:217628087:C:T	2	217628087	C	T	2:217614595:C:T	rs2712185	2	217614595	T	C	0.947948	intron_variant,non_coding_transcript_variant	MODIFIER	AC007563.5	ENSG00000236886	antisense	-	2/3	-	-	-	-	-	rs2712185	-	1	Ensembl	-	-	-	-	-	0.106	0.0068	0.1427	0.1716	0.1491	0.1022	-	-	-	-
30	previously not reported*	AC007563.5	2:217628087:C:T	2	217628087	C	T	2:217614730:A:T	rs6435952	2	217614730	A	T	0.947948	intron_variant,non_coding_transcript_variant	MODIFIER	AC007563.5	ENSG00000236886	antisense	-	2/3	-	-	-	-	-	rs6435952	-	1	Ensembl	-	-	-	-	-	0.8101	0.6868	0.8372	0.8274	0.8509	0.8978	-	-	-	-
30	previously not reported*	AC007563.5	2:217628087:C:T	2	217628087	C	T	2:217616274:A:G	rs60118634	2	217616274	A	G	0.948258	intron_variant,non_coding_transcript_variant	MODIFIER	AC007563.5	ENSG00000236886	antisense	-	2/3	-	-	-	-	-	rs60118634	-	1	Ensembl	-	-	-	-	-	0.1056	0.0068	0.1398	0.1716	0.1491	0.1022	-	-	-	-
30	previously not reported*	AC007563.5	2:217628087:C:T	2	217628087	C	T	2:217616484:D:I	rs57866041	2	217616484	D	I	0.955318	intron_variant,non_coding_transcript_variant	MODIFIER	AC007563.5	ENSG00000236886	antisense	-	2/3	-	-	-	-	-	rs57866041	-	1	Ensembl	-	-	-	-	-	0.8315	0.7632	0.8444	0.8284	0.8519	0.8967	-	-	-	-
30	previously not reported*	AC007563.5	2:217628087:C:T	2	217628087	C	T	2:217616804:C:T	rs1861630	2	217616804	T	C	0.947948	intron_variant,non_coding_transcript_variant	MODIFIER	AC007563.5	ENSG00000236886	antisense	-	2/3	-	-	-	-	-	rs1861630	-	1	Ensembl	-	-	-	-	-	0.8628	0.8812	0.8458	0.8284	0.8509	0.8978	-	-	-	-
30	previously not reported*	AC007563.5	2:217628087:C:T	2	217628087	C	T	2:217618897:C:G	rs1548943	2	217618897	C	G	0.955318	intron_variant,non_coding_transcript_variant	MODIFIER	AC007563.5	ENSG00000236886	antisense	-	2/3	-	-	-	-	-	rs1548943	-	1	Ensembl	-	-	-	-	-	0.1064	0.0091	0.1427	0.1736	0.1481	0.1002	-	-	-	-
30	previously not reported*	AC007563.5	2:217628087:C:T	2	217628087	C	T	2:217619036:C:T	rs1548942	2	217619036	C	T	0.955318	intron_variant,non_coding_transcript_variant	MODIFIER	AC007563.5	ENSG00000236886	antisense	-	2/3	-	-	-	-	-	rs1548942	-	1	Ensembl	-	-	-	-	-	0.1058	0.0091	0.1383	0.1736	0.1481	0.1002	-	-	-	-
30	previously not reported*	AC007563.5	2:217628087:C:T	2	217628087	C	T	2:217619060:A:C	rs1548941	2	217619060	C	A	0.962773	intron_variant,non_coding_transcript_variant	MODIFIER	AC007563.5	ENSG00000236886	antisense	-	2/3	-	-	-	-	-	rs1548941	-	1	Ensembl	-	-	-	-	-	0.1058	0.0091	0.1398	0.1736	0.1471	0.1002	-	-	-	-
30	previously not reported*	AC007563.5	2:217628087:C:T	2	217628087	C	T	2:217619192:D:I	rs11280610	2	217619192	D	I	0.955318	intron_variant,non_coding_transcript_variant	MODIFIER	AC007563.5	ENSG00000236886	antisense	-	2/3	-	-	-	-	-	rs11280610	-	1	Ensembl	-	-	-	-	-	0.1056	0.0076	0.1398	0.1736	0.1481	0.1002	-	-	-	-
30	previously not reported*	AC007563.5	2:217628087:C:T	2	217628087	C	T	2:217619195:A:T	rs62178336	2	217619195	A	T	0.962773	intron_variant,non_coding_transcript_variant	MODIFIER	AC007563.5	ENSG00000236886	antisense	-	2/3	-	-	-	-	-	rs62178336	-	1	Ensembl	-	-	-	-	-	0.1058	0.0091	0.1398	0.1736	0.1471	0.1002	-	-	-	-
30	previously not reported*	AC007563.5	2:217628087:C:T	2	217628087	C	T	2:217619253:C:T	rs2541413	2	217619253	C	T	0.962773	intron_variant,non_coding_transcript_variant	MODIFIER	AC007563.5	ENSG00000236886	antisense	-	2/3	-	-	-	-	-	rs2541413	-	1	Ensembl	-	-	-	-	-	0.1056	0.0091	0.1398	0.1726	0.1471	0.1002	-	-	-	-
30	previously not reported*	AC007563.5	2:217628087:C:T	2	217628087	C	T	2:217619858:D:I	rs2712170	2	217619858	D	I	0.970315	intron_variant,non_coding_transcript_variant	MODIFIER	AC007563.5	ENSG00000236886	antisense	-	2/3	-	-	-	-	-	rs2712170	-	1	Ensembl	-	-	-	-	-	-	0.0015	0	0	0	0.001	-	-	-	-
30	previously not reported*	AC007563.5	2:217628087:C:T	2	217628087	C	T	2:217624194:C:T	rs2888429	2	217624194	T	C	0.977666	intron_variant,non_coding_transcript_variant	MODIFIER	AC007563.5	ENSG00000236886	antisense	-	2/3	-	-	-	-	-	rs2888429	-	1	Ensembl	-	-	-	-	-	0.8676	0.9002	0.8473	0.8294	0.8509	0.8947	-	-	-	-
30	previously not reported*	AC007563.5	2:217628087:C:T	2	217628087	C	T	2:217624249:C:G	rs2098418	2	217624249	C	G	0.985117	intron_variant,non_coding_transcript_variant	MODIFIER	AC007563.5	ENSG00000236886	antisense	-	2/3	-	-	-	-	-	rs2098418	-	1	Ensembl	-	-	-	-	-	0.1084	0.0144	0.1441	0.1706	0.1481	0.1053	-	-	-	-
30	previously not reported*	AC007563.5	2:217628087:C:T	2	217628087	C	T	2:217627150:A:G	rs10932677	2	217627150	G	A	0.992561	intron_variant,non_coding_transcript_variant	MODIFIER	AC007563.5	ENSG00000236886	antisense	-	2/3	-	-	-	-	-	rs10932677	-	1	Ensembl	-	-	-	-	-	0.8442	0.8139	0.8444	0.8294	0.8489	0.8957	-	-	-	-
30	previously not reported*	AC007563.5	2:217628087:C:T	2	217628087	C	T	2:217628087:C:T	rs6435953	2	217628087	C	T	1	intron_variant,non_coding_transcript_variant	MODIFIER	AC007563.5	ENSG00000236886	antisense	-	2/3	-	-	-	-	-	rs6435953	-	1	Ensembl	-	-	-	-	-	0.7943	0.6899	0.8329	0.754	0.8499	0.8926	-	-	-	-
30	previously not reported*	AC007563.5	2:217628087:C:T	2	217628087	C	T	2:217630886:D:I	rs144306764	2	217630886	I	A	0.919634	intron_variant,non_coding_transcript_variant	MODIFIER	AC007563.5	ENSG00000236886	antisense	-	3/3	-	-	-	-	-	rs144306764	-	1	Ensembl	-	-	-	-	-	0.1022	0.0068	0.1383	0.1647	0.1412	0.1012	-	-	-	-
30	previously not reported*	AC007563.5	2:217628087:C:T	2	217628087	C	T	2:217631338:C:T	rs17773965	2	217631338	C	T	0.919634	intron_variant,non_coding_transcript_variant	MODIFIER	AC007563.5	ENSG00000236886	antisense	-	3/3	-	-	-	-	-	rs17773965	-	1	Ensembl	-	-	-	-	-	0.1368	0.1339	0.1556	0.1577	0.1412	0.1012	-	-	-	-
30	previously not reported*	AC007563.5	2:217628087:C:T	2	217628087	C	T	2:217631840:C:T	rs2193234	2	217631840	C	T	0.891514	intron_variant,non_coding_transcript_variant	MODIFIER	AC007563.5	ENSG00000236886	antisense	-	3/3	-	-	-	-	-	rs2193234	-	1	Ensembl	-	-	-	-	-	0.1102	0.0537	0.147	0.1468	0.1372	0.0951	-	-	-	-
30	previously not reported*	AC007563.5	2:217628087:C:T	2	217628087	C	T	2:217632085:A:G	rs7602943	2	217632085	A	G	0.869803	intron_variant,non_coding_transcript_variant	MODIFIER	AC007563.5	ENSG00000236886	antisense	-	3/3	-	-	-	-	-	rs7602943	-	1	Ensembl	-	-	-	-	-	0.8335	0.798	0.8444	0.7778	0.8618	0.9018	-	-	-	-
31	previously not reported	TMEM198	2:220414019:C:T	2	220414019	T	C	2:220414019:C:T	rs13023533	2	220414019	T	C	1	synonymous_variant	LOW	TMEM198	ENSG00000188760	protein_coding	5/6	-	1473	888	296	P	ccT/ccC	rs13023533	-	1	Ensembl	-	-	-	-	-	0.3924	0.4077	0.5231	0.38	0.4592	0.2229	-	-	-	-
31	previously not reported	TMEM198	2:220414019:C:T	2	220414019	T	C	2:220415595:D:I	rs146790993	2	220415595	I	G	0.964775	intron_variant	MODIFIER	OBSL1	ENSG00000124006	protein_coding	-	20/20	-	-	-	-	-	rs146790993	-	-1	Ensembl	-	-	-	-	-	0.384	0.3797	0.5216	0.38	0.4563	0.2219	-	-	-	-
31	previously not reported	TMEM198	2:220414019:C:T	2	220414019	T	C	2:220415646:C:T	rs1043582	2	220415646	T	C	0.963919	intron_variant	MODIFIER	OBSL1	ENSG00000124006	protein_coding	-	20/20	-	-	-	-	-	rs1043582	-	-1	Ensembl	-	-	-	-	-	0.3842	0.3797	0.5216	0.381	0.4563	0.2219	-	-	-	-
31	previously not reported	TMEM198	2:220414019:C:T	2	220414019	T	C	2:220416942:C:G	rs34490902	2	220416942	G	C	0.953349	splice_region_variant,intron_variant	LOW	OBSL1	ENSG00000124006	protein_coding	-	18/20	-	-	-	-	-	rs34490902	-	-1	Ensembl	-	-	-	7.7630500533526E-5	0.104	0.3876	0.3812	0.5231	0.379	0.4702	0.2239	benign	-	1	-
31	previously not reported	TMEM198	2:220414019:C:T	2	220414019	T	C	2:220417266:C:T	rs59332477	2	220417266	C	T	0.927016	missense_variant	MODERATE	OBSL1	ENSG00000124006	protein_coding	18/21	-	5357	5300	1767	R/Q	cGa/cAa	rs59332477	-	-1	Ensembl	tolerated(0.33)	probably_damaging(0.997)	deleterious(0.490)	-	-	0.3766	0.3495	0.5202	0.3819	0.4583	0.2219	benign	-	1	-
32	previously not reported	LSM3	3:14275759:C:G	3	14275759	C	G	3:14273414:C:G	rs55834511	3	14273414	G	C	0.827418	intergenic_variant	MODIFIER	-	-	-	-	-	-	-	-	-	-	rs55834511	-	-	-	-	-	-	-	-	0.1651	0.2277	0.1427	0.1062	0.2406	0.0798	-	-	-	-
32	previously not reported	LSM3	3:14275759:C:G	3	14275759	C	G	3:14273464:C:T	rs55647831	3	14273464	C	T	0.990716	intergenic_variant	MODIFIER	-	-	-	-	-	-	-	-	-	-	rs55647831	-	-	-	-	-	-	-	-	0.1432	0.1475	0.1369	0.1062	0.2406	0.0798	-	-	-	-
32	previously not reported	LSM3	3:14275759:C:G	3	14275759	C	G	3:14273472:C:T	rs56242556	3	14273472	C	T	0.990716	intergenic_variant	MODIFIER	-	-	-	-	-	-	-	-	-	-	rs56242556	-	-	-	-	-	-	-	-	0.1432	0.1475	0.1369	0.1062	0.2406	0.0798	-	-	-	-
32	previously not reported	LSM3	3:14275759:C:G	3	14275759	C	G	3:14274293:C:T	rs56281979	3	14274293	C	T	0.894373	regulatory_region_variant	MODIFIER	-	-	CTCF_binding_site	-	-	-	-	-	-	-	rs56281979	-	-	-	-	-	-	-	-	-	-	-	-	-	-	-	-	-	-
32	previously not reported	LSM3	3:14275759:C:G	3	14275759	C	G	3:14275759:C:G	rs6442433	3	14275759	C	G	1	intergenic_variant	MODIFIER	-	-	-	-	-	-	-	-	-	-	rs6442433	-	-	-	-	-	-	-	-	0.144	0.1513	0.1369	0.1052	0.2406	0.0798	-	-	-	-
32	previously not reported	LSM3	3:14275759:C:G	3	14275759	C	G	3:14276494:A:G	rs62231949	3	14276494	G	A	0.989168	intergenic_variant	MODIFIER	-	-	-	-	-	-	-	-	-	-	rs62231949	-	-	-	-	-	-	-	-	0.1434	0.1475	0.1369	0.1071	0.2406	0.0798	-	-	-	-
32	previously not reported	LSM3	3:14275759:C:G	3	14275759	C	G	3:14276982:A:G	rs17226476	3	14276982	G	A	0.990716	regulatory_region_variant	MODIFIER	-	-	enhancer	-	-	-	-	-	-	-	rs17226476	-	-	-	-	-	-	-	-	0.1432	0.1475	0.1383	0.1052	0.2406	0.0798	-	-	-	-
33	previously not reported	THRB	3:24465080:C:T	3	24465080	C	T	3:24463235:C:T	rs73041705	3	24463235	T	C	0.968778	intron_variant	MODIFIER	THRB	ENSG00000151090	protein_coding	-	1/10	-	-	-	-	-	rs73041705	-	-1	Ensembl	-	-	-	-	-	0.262	0.093	0.33	0.3552	0.3052	0.3016	-	-	-	-
33	previously not reported	THRB	3:24465080:C:T	3	24465080	C	T	3:24463912:A:G	rs73041706	3	24463912	A	G	0.929791	intron_variant	MODIFIER	THRB	ENSG00000151090	protein_coding	-	1/10	-	-	-	-	-	rs73041706	-	-1	Ensembl	-	-	-	-	-	0.27	0.1271	0.3329	0.3532	0.3012	0.3006	-	-	-	-
33	previously not reported	THRB	3:24465080:C:T	3	24465080	C	T	3:24464955:A:G	rs59212267	3	24464955	G	A	0.963106	intron_variant	MODIFIER	THRB	ENSG00000151090	protein_coding	-	1/10	-	-	-	-	-	rs59212267	-	-1	Ensembl	-	-	-	-	-	0.2628	0.0915	0.366	0.3462	0.3012	0.2955	-	-	-	-
33	previously not reported	THRB	3:24465080:C:T	3	24465080	C	T	3:24465080:C:T	rs60325252	3	24465080	C	T	1	intron_variant	MODIFIER	THRB	ENSG00000151090	protein_coding	-	1/10	-	-	-	-	-	rs60325252	-	-1	Ensembl	-	-	-	-	-	0.2584	0.093	0.33	0.3472	0.3012	0.2955	-	-	-	-
33	previously not reported	THRB	3:24465080:C:T	3	24465080	C	T	3:24472866:A:G	rs73032363	3	24472866	A	G	0.968603	intron_variant	MODIFIER	THRB	ENSG00000151090	protein_coding	-	1/10	-	-	-	-	-	rs73032363	-	-1	Ensembl	-	-	-	-	-	0.2624	0.1044	0.3256	0.3522	0.3022	0.2975	-	-	-	-
33	previously not reported	THRB	3:24465080:C:T	3	24465080	C	T	3:24474353:C:T	rs1865712	3	24474353	T	C	0.963021	intron_variant	MODIFIER	THRB	ENSG00000151090	protein_coding	-	1/10	-	-	-	-	-	rs1865712	-	-1	Ensembl	-	-	-	-	-	0.2636	0.1044	0.3271	0.3552	0.3052	0.2965	-	-	-	-
33	previously not reported	THRB	3:24465080:C:T	3	24465080	C	T	3:24475162:C:T	rs73032373	3	24475162	T	C	0.943135	intron_variant	MODIFIER	THRB	ENSG00000151090	protein_coding	-	1/10	-	-	-	-	-	rs73032373	-	-1	Ensembl	-	-	-	-	-	0.267	0.1188	0.3285	0.3552	0.3022	0.2965	-	-	-	-
33	previously not reported	THRB	3:24465080:C:T	3	24465080	C	T	3:24475505:D:I	rs35329851	3	24475505	I	C	0.967703	intron_variant	MODIFIER	THRB	ENSG00000151090	protein_coding	-	1/10	-	-	-	-	-	rs35329851	-	-1	Ensembl	-	-	-	-	-	0.2618	0.1029	0.3242	0.3552	0.3002	0.2965	-	-	-	-
34	previously not reported	TRAK1	3:42103045:G:T	3	42103045	T	G	3:42103045:G:T	rs11921457	3	42103045	T	G	1	intron_variant	MODIFIER	TRAK1	22906	protein_coding	-	1/16	-	-	-	-	-	rs11921457	-	1	RefSeq	-	-	-	-	-	0.1368	0.0083	0.1441	0.245	0.1879	0.1411	-	-	-	-
35	previously not reported	LAMB2	3:49166069:C:T	3	49166069	C	T	3:48801929:A:G	rs6766238	3	48801929	G	A	0.90779	intron_variant	MODIFIER	PRKAR2A	ENSG00000114302	protein_coding	-	8/10	-	-	-	-	-	rs6766238	-	-1	Ensembl	-	-	-	-	-	0.9028	0.8986	0.8602	1	0.7813	0.9632	-	-	-	-
35	previously not reported	LAMB2	3:49166069:C:T	3	49166069	C	T	3:48837182:C:T	rs9859473	3	48837182	T	C	0.901453	intron_variant	MODIFIER	PRKAR2A	ENSG00000114302	protein_coding	-	2/10	-	-	-	-	-	rs9859473	-	-1	Ensembl	-	-	-	-	-	0.9034	0.9009	0.8602	1	0.7813	0.9632	-	-	-	22131368
35	previously not reported	LAMB2	3:49166069:C:T	3	49166069	C	T	3:48838364:C:T	rs7611628	3	48838364	T	C	0.905734	intron_variant	MODIFIER	PRKAR2A	ENSG00000114302	protein_coding	-	2/10	-	-	-	-	-	rs7611628	-	-1	Ensembl	-	-	-	-	-	0.903	0.8994	0.8602	1	0.7813	0.9632	-	-	-	-
35	previously not reported	LAMB2	3:49166069:C:T	3	49166069	C	T	3:48846600:G:T	rs9879978	3	48846600	T	G	0.906033	intron_variant	MODIFIER	PRKAR2A	ENSG00000114302	protein_coding	-	1/10	-	-	-	-	-	rs9879978	-	-1	Ensembl	-	-	-	-	-	0.9026	0.8986	0.8602	1	0.7803	0.9632	-	-	-	-
35	previously not reported	LAMB2	3:49166069:C:T	3	49166069	C	T	3:48927856:C:T	rs7611358	3	48927856	C	T	0.909849	intron_variant	MODIFIER	SLC25A20	ENSG00000178537	protein_coding	-	2/8	-	-	-	-	-	rs7611358	-	-1	Ensembl	-	-	-	-	-	0.9026	0.8986	0.8602	1	0.7803	0.9632	-	-	-	-
35	previously not reported	LAMB2	3:49166069:C:T	3	49166069	C	T	3:48928759:C:T	rs7621226	3	48928759	T	C	0.90809	intron_variant	MODIFIER	SLC25A20	ENSG00000178537	protein_coding	-	2/8	-	-	-	-	-	rs7621226	-	-1	Ensembl	-	-	-	-	-	0.9024	0.8979	0.8602	1	0.7803	0.9632	-	-	-	-
35	previously not reported	LAMB2	3:49166069:C:T	3	49166069	C	T	3:48932477:D:I	rs10662156	3	48932477	D	I	0.909849	intron_variant	MODIFIER	SLC25A20	ENSG00000178537	protein_coding	-	1/8	-	-	-	-	-	rs10662156	-	-1	Ensembl	-	-	-	-	-	0.9026	0.8986	0.8602	1	0.7803	0.9632	-	-	-	-
35	previously not reported	LAMB2	3:49166069:C:T	3	49166069	C	T	3:48942855:A:C	rs12715430	3	48942855	A	C	0.903507	intergenic_variant	MODIFIER	-	-	-	-	-	-	-	-	-	-	rs12715430	-	-	-	-	-	-	-	-	0.9032	0.9009	0.8602	1	0.7803	0.9632	-	-	-	-
35	previously not reported	LAMB2	3:49166069:C:T	3	49166069	C	T	3:48947164:C:T	rs62259536	3	48947164	T	C	0.903507	intergenic_variant	MODIFIER	-	-	-	-	-	-	-	-	-	-	rs62259536	-	-	-	-	-	-	-	-	0.9032	0.9009	0.8602	1	0.7803	0.9632	-	-	-	-
35	previously not reported	LAMB2	3:49166069:C:T	3	49166069	C	T	3:48953349:C:T	rs11707968	3	48953349	C	T	0.903507	upstream_gene_variant	MODIFIER	ARIH2	ENSG00000177479	protein_coding	-	-	-	-	-	-	-	rs11707968	2905	1	Ensembl	-	-	-	-	-	0.9032	0.9009	0.8602	1	0.7803	0.9632	-	-	-	-
35	previously not reported	LAMB2	3:49166069:C:T	3	49166069	C	T	3:48960572:A:G	rs9284886	3	48960572	A	G	0.901561	intron_variant	MODIFIER	ARIH2	ENSG00000177479	protein_coding	-	2/15	-	-	-	-	-	rs9284886	-	1	Ensembl	-	-	-	-	-	0.903	0.9002	0.8602	1	0.7803	0.9632	-	-	-	-
35	previously not reported	LAMB2	3:49166069:C:T	3	49166069	C	T	3:48972351:A:C	rs7653408	3	48972351	A	C	0.903507	intron_variant	MODIFIER	ARIH2	ENSG00000177479	protein_coding	-	3/15	-	-	-	-	-	rs7653408	-	1	Ensembl	-	-	-	-	-	0.9032	0.9009	0.8602	1	0.7803	0.9632	-	-	-	-
35	previously not reported	LAMB2	3:49166069:C:T	3	49166069	C	T	3:48982732:A:G	rs9864243	3	48982732	G	A	0.904051	intron_variant	MODIFIER	ARIH2	ENSG00000177479	protein_coding	-	3/15	-	-	-	-	-	rs9864243	-	1	Ensembl	-	-	-	-	-	0.902	0.8964	0.8602	1	0.7803	0.9632	-	-	-	-
35	previously not reported	LAMB2	3:49166069:C:T	3	49166069	C	T	3:48991255:A:G	rs7372883	3	48991255	G	A	0.899936	intron_variant	MODIFIER	ARIH2	ENSG00000177479	protein_coding	-	3/15	-	-	-	-	-	rs7372883	-	1	Ensembl	-	-	-	-	-	0.9024	0.8979	0.8602	1	0.7803	0.9632	-	-	-	-
35	previously not reported	LAMB2	3:49166069:C:T	3	49166069	C	T	3:49053219:A:G	rs7100	3	49053219	A	G	0.888832	3_prime_UTR_variant	MODIFIER	WDR6	ENSG00000178252	protein_coding	6/6	-	4234	-	-	-	-	rs7100	-	1	Ensembl	-	-	-	-	-	0.9054	0.9032	0.8646	1	0.7863	0.9622	-	-	-	-
35	previously not reported	LAMB2	3:49166069:C:T	3	49166069	C	T	3:49054692:C:T	rs3087866	3	49054692	T	C	0.888907	missense_variant	MODERATE	DALRD3	ENSG00000178149	protein_coding	5/12	-	903	896	299	Q/R	cAg/cGg	rs3087866	-	-1	Ensembl	tolerated(1)	benign(0)	neutral(0.000)	-	-	0.905	0.9017	0.8646	1	0.7863	0.9622	-	-	-	-
35	previously not reported	LAMB2	3:49166069:C:T	3	49166069	C	T	3:49070499:C:T	rs4974081	3	49070499	C	T	0.9135	intron_variant	MODIFIER	QRICH1	ENSG00000198218	protein_coding	-	7/9	-	-	-	-	-	rs4974081	-	-1	Ensembl	-	-	-	-	-	0.9034	0.9024	0.8602	1	0.7803	0.9622	-	-	-	20679962,18976158
35	previously not reported	LAMB2	3:49166069:C:T	3	49166069	C	T	3:49079105:C:T	rs6787808	3	49079105	T	C	0.9135	intron_variant	MODIFIER	QRICH1	ENSG00000198218	protein_coding	-	6/9	-	-	-	-	-	rs6787808	-	-1	Ensembl	-	-	-	-	-	0.9034	0.9024	0.8602	1	0.7803	0.9622	-	-	-	-
35	previously not reported	LAMB2	3:49166069:C:T	3	49166069	C	T	3:49086213:D:I	rs541852187	3	49086213	D	I	0.901806	intron_variant	MODIFIER	QRICH1	ENSG00000198218	protein_coding	-	3/9	-	-	-	-	-	rs541852187	-	-1	Ensembl	-	-	-	-	-	-	0.8994	0.8602	0.998	0.7803	0.9622	-	-	-	-
35	previously not reported	LAMB2	3:49166069:C:T	3	49166069	C	T	3:49086215:C:T	rs57630346	3	49086215	T	C	0.901806	intron_variant	MODIFIER	QRICH1	ENSG00000198218	protein_coding	-	3/9	-	-	-	-	-	rs57630346	-	-1	Ensembl	-	-	-	-	-	0.9022	0.8994	0.8602	0.998	0.7803	0.9622	-	-	-	-
35	previously not reported	LAMB2	3:49166069:C:T	3	49166069	C	T	3:49088127:D:I	rs138950270	3	49088127	I	A	0.881249	intron_variant	MODIFIER	QRICH1	ENSG00000198218	protein_coding	-	3/9	-	-	-	-	-	rs138950270	-	-1	Ensembl	-	-	-	-	-	0.9	0.8903	0.8602	0.999	0.7803	0.9622	-	-	-	-
35	previously not reported	LAMB2	3:49166069:C:T	3	49166069	C	T	3:49093377:A:G	rs6798112	3	49093377	A	G	0.91556	intron_variant	MODIFIER	QRICH1	ENSG00000198218	protein_coding	-	3/9	-	-	-	-	-	rs6798112	-	-1	Ensembl	-	-	-	-	-	0.9032	0.9017	0.8602	1	0.7803	0.9622	-	-	-	-
35	previously not reported	LAMB2	3:49166069:C:T	3	49166069	C	T	3:49100305:C:T	rs13099075	3	49100305	T	C	0.91556	intron_variant	MODIFIER	QRICH1	ENSG00000198218	protein_coding	-	2/9	-	-	-	-	-	rs13099075	-	-1	Ensembl	-	-	-	-	-	0.9032	0.9017	0.8602	1	0.7803	0.9622	-	-	-	-
35	previously not reported	LAMB2	3:49166069:C:T	3	49166069	C	T	3:49102001:A:T	rs6446247	3	49102001	A	T	0.91556	intron_variant	MODIFIER	QRICH1	ENSG00000198218	protein_coding	-	2/9	-	-	-	-	-	rs6446247	-	-1	Ensembl	-	-	-	-	-	0.9032	0.9017	0.8602	1	0.7803	0.9622	-	-	-	-
35	previously not reported	LAMB2	3:49166069:C:T	3	49166069	C	T	3:49166069:C:T	rs9865051	3	49166069	C	T	1	intron_variant	MODIFIER	LAMB2	ENSG00000172037	protein_coding	-	15/32	-	-	-	-	-	rs9865051	-	-1	Ensembl	-	-	-	-	-	0.9034	0.8994	0.853	1	0.7913	0.9601	-	-	-	20556798
35	previously not reported	LAMB2	3:49166069:C:T	3	49166069	C	T	3:49398514:A:C	rs892974	3	49398514	C	A	0.811995	intron_variant	MODIFIER	RHOA	ENSG00000067560	protein_coding	-	4/4	-	-	-	-	-	rs892974	-	-1	Ensembl	-	-	-	-	-	0.8862	0.8941	0.8228	0.9871	0.7654	0.9407	-	-	-	-
35	previously not reported	LAMB2	3:49166069:C:T	3	49166069	C	T	3:49401153:C:T	rs6446262	3	49401153	T	C	0.837964	intron_variant	MODIFIER	RHOA	ENSG00000067560	protein_coding	-	3/4	-	-	-	-	-	rs6446262	-	-1	Ensembl	-	-	-	-	-	0.8886	0.8979	0.8256	0.9871	0.7684	0.9427	-	-	-	-
35	previously not reported	LAMB2	3:49166069:C:T	3	49166069	C	T	3:49402351:C:T	rs9812360	3	49402351	T	C	0.837964	intron_variant	MODIFIER	RHOA	ENSG00000067560	protein_coding	-	3/4	-	-	-	-	-	rs9812360	-	-1	Ensembl	-	-	-	-	-	0.8886	0.8979	0.8256	0.9871	0.7684	0.9427	-	-	-	-
35	previously not reported	LAMB2	3:49166069:C:T	3	49166069	C	T	3:49425167:A:G	rs62259943	3	49425167	A	G	0.836905	intron_variant	MODIFIER	RHOA	ENSG00000067560	protein_coding	-	1/4	-	-	-	-	-	rs62259943	-	-1	Ensembl	-	-	-	-	-	0.112	0.1029	0.1744	0.0129	0.2336	0.0573	-	-	-	-
35	previously not reported	LAMB2	3:49166069:C:T	3	49166069	C	T	3:49439924:C:T	rs62259947	3	49439924	T	C	0.837964	intron_variant	MODIFIER	RHOA	ENSG00000067560	protein_coding	-	1/4	-	-	-	-	-	rs62259947	-	-1	Ensembl	-	-	-	-	-	0.1114	0.1021	0.1744	0.0129	0.2316	0.0573	-	-	-	-
35	previously not reported	LAMB2	3:49166069:C:T	3	49166069	C	T	3:49448423:A:G	rs73088137	3	49448423	G	A	0.835919	intron_variant	MODIFIER	RHOA	ENSG00000067560	protein_coding	-	1/4	-	-	-	-	-	rs73088137	-	-1	Ensembl	-	-	-	-	-	0.1112	0.1014	0.1744	0.0129	0.2316	0.0573	-	-	-	-
35	previously not reported	LAMB2	3:49166069:C:T	3	49166069	C	T	3:49471522:C:G	rs6805609	3	49471522	G	C	0.815269	upstream_gene_variant	MODIFIER	NICN1	ENSG00000145029	protein_coding	-	-	-	-	-	-	-	rs6805609	4763	-1	Ensembl	-	-	-	-	-	0.1154	0.1157	0.1772	0.0129	0.2316	0.0573	-	-	-	-
35	previously not reported	LAMB2	3:49166069:C:T	3	49166069	C	T	3:49483193:C:T	rs138084484	3	49483193	C	T	0.829778	regulatory_region_variant	MODIFIER	-	-	promoter_flanking_region	-	-	-	-	-	-	-	rs138084484	-	-	-	-	-	-	-	-	0.111	0.1014	0.1744	0.0129	0.2306	0.0573	-	-	-	-
35	previously not reported	LAMB2	3:49166069:C:T	3	49166069	C	T	3:49508976:C:T	rs7613491	3	49508976	T	C	0.832815	intron_variant	MODIFIER	DAG1	ENSG00000173402	protein_coding	-	2/5	-	-	-	-	-	rs7613491	-	1	Ensembl	-	-	-	-	-	0.1116	0.1029	0.1744	0.0129	0.2316	0.0573	-	-	-	-
35	previously not reported	LAMB2	3:49166069:C:T	3	49166069	C	T	3:49510931:A:G	rs7647973	3	49510931	G	A	0.820046	intron_variant	MODIFIER	DAG1	ENSG00000173402	protein_coding	-	2/5	-	-	-	-	-	rs7647973	-	1	Ensembl	-	-	-	-	-	0.1114	0.1006	0.1744	0.0129	0.2336	0.0573	-	-	1	25231870
35	previously not reported	LAMB2	3:49166069:C:T	3	49166069	C	T	3:49524778:C:G	rs6783003	3	49524778	G	C	0.822602	5_prime_UTR_variant	MODIFIER	DAG1	ENSG00000173402	protein_coding	4/6	-	536	-	-	-	-	rs6783003	-	1	Ensembl	-	-	-	-	-	0.111	0.1006	0.1744	0.0129	0.2316	0.0573	-	-	-	-
35	previously not reported	LAMB2	3:49166069:C:T	3	49166069	C	T	3:49533931:C:T	rs7651372	3	49533931	C	T	0.832815	intron_variant	MODIFIER	DAG1	ENSG00000173402	protein_coding	-	4/5	-	-	-	-	-	rs7651372	-	1	Ensembl	-	-	-	-	-	0.1116	0.1029	0.1744	0.0129	0.2316	0.0573	-	-	-	-
35	previously not reported	LAMB2	3:49166069:C:T	3	49166069	C	T	3:49543515:C:T	rs149273410	3	49543515	C	T	0.830774	intron_variant	MODIFIER	DAG1	ENSG00000173402	protein_coding	-	4/5	-	-	-	-	-	rs149273410	-	1	Ensembl	-	-	-	-	-	0.1114	0.1029	0.1729	0.0129	0.2316	0.0573	-	-	-	-
35	previously not reported	LAMB2	3:49166069:C:T	3	49166069	C	T	3:49547170:D:I	rs11405695	3	49547170	D	I	0.82973	intron_variant	MODIFIER	DAG1	ENSG00000173402	protein_coding	-	4/5	-	-	-	-	-	rs11405695	-	1	Ensembl	-	-	-	-	-	0.112	0.1036	0.1744	0.0139	0.2316	0.0573	-	-	-	-
36	previously not reported	ADCY5	3:123117165:C:T	3	123117165	C	T	3:123117165:C:T	rs1000368	3	123117165	C	T	1	intron_variant	MODIFIER	ADCY5	ENSG00000173175	protein_coding	-	1/20	-	-	-	-	-	rs1000368	-	-1	Ensembl	-	-	-	-	-	0.2368	0.1006	0.2291	0.2907	0.2873	0.319	-	-	-	-
36	previously not reported	ADCY5	3:123117165:C:T	3	123117165	C	T	3:123121286:A:G	rs12496583	3	123121286	A	G	0.926863	intron_variant	MODIFIER	ADCY5	ENSG00000173175	protein_coding	-	1/20	-	-	-	-	-	rs12496583	-	-1	Ensembl	-	-	-	-	-	0.2368	0.0961	0.232	0.2907	0.2932	0.317	-	-	-	23278386
36	previously not reported	ADCY5	3:123117165:C:T	3	123117165	C	T	3:123122637:A:T	rs62262407	3	123122637	T	A	0.917823	intron_variant	MODIFIER	ADCY5	ENSG00000173175	protein_coding	-	1/20	-	-	-	-	-	rs62262407	-	-1	Ensembl	-	-	-	-	-	0.239	0.0968	0.232	0.3006	0.2932	0.317	-	-	-	-
36	previously not reported	ADCY5	3:123117165:C:T	3	123117165	C	T	3:123124824:C:G	rs67946200	3	123124824	G	C	0.925762	intron_variant	MODIFIER	ADCY5	ENSG00000173175	protein_coding	-	1/20	-	-	-	-	-	rs67946200	-	-1	Ensembl	-	-	-	-	-	-	-	-	-	-	-	-	-	-	-
36	previously not reported	ADCY5	3:123117165:C:T	3	123117165	C	T	3:123125779:A:G	rs62262427	3	123125779	A	G	0.913866	intron_variant	MODIFIER	ADCY5	ENSG00000173175	protein_coding	-	1/20	-	-	-	-	-	rs62262427	-	-1	Ensembl	-	-	-	-	-	0.2406	0.1074	0.2334	0.2897	0.2932	0.3211	-	-	-	-
36	previously not reported	ADCY5	3:123117165:C:T	3	123117165	C	T	3:123126268:C:T	rs57572875	3	123126268	T	C	0.940157	intron_variant	MODIFIER	ADCY5	ENSG00000173175	protein_coding	-	1/20	-	-	-	-	-	rs57572875	-	-1	Ensembl	-	-	-	-	-	0.2342	0.087	0.2305	0.2897	0.2932	0.318	-	-	-	-
37	previously not reported	TSC22D2	3:150176904:D:I	3	150176904	I	T	3:150176904:D:I	rs201481721	3	150176904	I	T	1	3_prime_UTR_variant	MODIFIER	TSC22D2	ENSG00000196428	protein_coding	4/4	-	3841-3842	-	-	-	-	rs201481721	-	1	Ensembl	-	-	-	-	-	0.0112	0	0.036	0	0.0258	0.0051	-	-	-	-
37	previously not reported	TSC22D2	3:150176904:D:I	3	150176904	I	T	3:150202023:C:T	rs80124810	3	150202023	C	T	0.841109	intergenic_variant	MODIFIER	-	-	-	-	-	-	-	-	-	-	rs80124810	-	-	-	-	-	-	-	-	0.011	0.0008	0.0331	0	0.0249	0.0061	-	-	-	-
38	previously not reported	RAP2B	3:153000092:C:T	3	153000092	C	T	3:152984964:C:T	rs6805102	3	152984964	C	T	0.826132	intergenic_variant	MODIFIER	-	-	-	-	-	-	-	-	-	-	rs6805102	-	-	-	-	-	-	-	-	0.617	0.8865	0.4798	0.5893	0.496	0.5031	-	-	-	-
38	previously not reported	RAP2B	3:153000092:C:T	3	153000092	C	T	3:152986534:C:G	rs6763119	3	152986534	G	C	0.823806	intergenic_variant	MODIFIER	-	-	-	-	-	-	-	-	-	-	rs6763119	-	-	-	-	-	-	-	-	-	0.8865	0.4784	0.5893	0.494	0.5031	-	-	-	-
38	previously not reported	RAP2B	3:153000092:C:T	3	153000092	C	T	3:152986817:A:C	rs75321310	3	152986817	C	A	0.863005	intergenic_variant	MODIFIER	-	-	-	-	-	-	-	-	-	-	rs2862069	-	-	-	-	-	-	-	-	0.5603	0.7065	0.4553	0.5635	0.496	0.5	-	-	-	-
38	previously not reported	RAP2B	3:153000092:C:T	3	153000092	C	T	3:152987467:A:C	rs9841427	3	152987467	A	C	0.820676	intergenic_variant	MODIFIER	-	-	-	-	-	-	-	-	-	-	rs9841427	-	-	-	-	-	-	-	-	0.6142	0.879	0.4769	0.5893	0.494	0.5031	-	-	-	-
38	previously not reported	RAP2B	3:153000092:C:T	3	153000092	C	T	3:152988883:G:T	rs6783139	3	152988883	T	G	0.821762	intergenic_variant	MODIFIER	-	-	-	-	-	-	-	-	-	-	rs6783139	-	-	-	-	-	-	-	-	0.6138	0.8775	0.4769	0.5893	0.494	0.5031	-	-	-	-
38	previously not reported	RAP2B	3:153000092:C:T	3	153000092	C	T	3:152989224:A:G	rs1160635	3	152989224	G	A	0.822852	intergenic_variant	MODIFIER	-	-	-	-	-	-	-	-	-	-	rs1160635	-	-	-	-	-	-	-	-	0.6134	0.8759	0.4769	0.5893	0.494	0.5031	-	-	-	-
38	previously not reported	RAP2B	3:153000092:C:T	3	153000092	C	T	3:152990087:C:T	rs9819147	3	152990087	C	T	0.827055	intergenic_variant	MODIFIER	-	-	-	-	-	-	-	-	-	-	rs9819147	-	-	-	-	-	-	-	-	0.6152	0.8775	0.4798	0.5893	0.497	0.5051	-	-	-	-
38	previously not reported	RAP2B	3:153000092:C:T	3	153000092	C	T	3:152992193:D:I	rs11293959	3	152992193	I	C	0.854308	intergenic_variant	MODIFIER	-	-	-	-	-	-	-	-	-	-	rs11293959	-	-	-	-	-	-	-	-	0.6144	0.8835	0.4813	0.5883	0.495	0.4949	-	-	-	-
38	previously not reported	RAP2B	3:153000092:C:T	3	153000092	C	T	3:152992240:C:T	rs9830030	3	152992240	C	T	0.854436	intergenic_variant	MODIFIER	-	-	-	-	-	-	-	-	-	-	rs9830030	-	-	-	-	-	-	-	-	0.6144	0.8835	0.4813	0.5883	0.495	0.4949	-	-	-	-
38	previously not reported	RAP2B	3:153000092:C:T	3	153000092	C	T	3:152992359:A:T	rs9850308	3	152992359	T	A	0.854995	intergenic_variant	MODIFIER	-	-	-	-	-	-	-	-	-	-	rs9850308	-	-	-	-	-	-	-	-	0.6142	0.8835	0.4813	0.5873	0.495	0.4949	-	-	-	-
38	previously not reported	RAP2B	3:153000092:C:T	3	153000092	C	T	3:152992716:A:G	rs9868297	3	152992716	A	G	0.831141	intergenic_variant	MODIFIER	-	-	-	-	-	-	-	-	-	-	rs9868297	-	-	-	-	-	-	-	-	0.6084	0.8835	0.4769	0.5635	0.495	0.4928	-	-	-	-
38	previously not reported	RAP2B	3:153000092:C:T	3	153000092	C	T	3:152994014:C:T	rs6440861	3	152994014	C	T	0.854995	intergenic_variant	MODIFIER	-	-	-	-	-	-	-	-	-	-	rs6440861	-	-	-	-	-	-	-	-	0.6142	0.8812	0.4813	0.5893	0.495	0.4959	-	-	-	-
38	previously not reported	RAP2B	3:153000092:C:T	3	153000092	C	T	3:152994074:A:G	rs6440862	3	152994074	G	A	0.854995	intergenic_variant	MODIFIER	-	-	-	-	-	-	-	-	-	-	rs6440862	-	-	-	-	-	-	-	-	0.6142	0.8812	0.4813	0.5893	0.495	0.4959	-	-	-	-
38	previously not reported	RAP2B	3:153000092:C:T	3	153000092	C	T	3:152994772:A:G	rs7355869	3	152994772	G	A	0.981028	intergenic_variant	MODIFIER	-	-	-	-	-	-	-	-	-	-	rs7355869	-	-	-	-	-	-	-	-	0.5801	0.7595	0.4683	0.5883	0.495	0.4959	-	-	-	-
38	previously not reported	RAP2B	3:153000092:C:T	3	153000092	C	T	3:152996074:C:T	rs9822986	3	152996074	C	T	0.853601	intergenic_variant	MODIFIER	-	-	-	-	-	-	-	-	-	-	rs9822986	-	-	-	-	-	-	-	-	0.6138	0.882	0.4798	0.5903	0.492	0.4959	-	-	-	-
38	previously not reported	RAP2B	3:153000092:C:T	3	153000092	C	T	3:152996756:C:T	rs9289895	3	152996756	C	T	0.857227	intergenic_variant	MODIFIER	-	-	-	-	-	-	-	-	-	-	rs9289895	-	-	-	-	-	-	-	-	0.6148	0.882	0.4827	0.5903	0.495	0.4959	-	-	-	-
38	previously not reported	RAP2B	3:153000092:C:T	3	153000092	C	T	3:152997569:G:T	rs4680044	3	152997569	G	T	0.859989	intergenic_variant	MODIFIER	-	-	-	-	-	-	-	-	-	-	rs4680044	-	-	-	-	-	-	-	-	0.6158	0.885	0.4827	0.5913	0.495	0.4959	-	-	-	-
38	previously not reported	RAP2B	3:153000092:C:T	3	153000092	C	T	3:152997756:A:G	rs4680045	3	152997756	A	G	0.859989	intergenic_variant	MODIFIER	-	-	-	-	-	-	-	-	-	-	rs4680045	-	-	-	-	-	-	-	-	0.6158	0.885	0.4827	0.5913	0.495	0.4959	-	-	-	-
38	previously not reported	RAP2B	3:153000092:C:T	3	153000092	C	T	3:152997867:A:C	rs4679703	3	152997867	C	A	0.984886	intergenic_variant	MODIFIER	-	-	-	-	-	-	-	-	-	-	rs4679703	-	-	-	-	-	-	-	-	0.5819	0.7625	0.4697	0.5913	0.496	0.4959	-	-	-	-
38	previously not reported	RAP2B	3:153000092:C:T	3	153000092	C	T	3:152998712:G:T	rs9289896	3	152998712	G	T	0.859158	intergenic_variant	MODIFIER	-	-	-	-	-	-	-	-	-	-	rs9289896	-	-	-	-	-	-	-	-	0.6156	0.885	0.4827	0.5913	0.495	0.4949	-	-	-	-
38	previously not reported	RAP2B	3:153000092:C:T	3	153000092	C	T	3:152999031:C:G	rs6786541	3	152999031	C	G	0.859989	intergenic_variant	MODIFIER	-	-	-	-	-	-	-	-	-	-	rs6786541	-	-	-	-	-	-	-	-	0.6158	0.885	0.4827	0.5913	0.495	0.4959	-	-	-	-
38	previously not reported	RAP2B	3:153000092:C:T	3	153000092	C	T	3:152999507:A:T	rs6765049	3	152999507	A	T	0.861258	intergenic_variant	MODIFIER	-	-	-	-	-	-	-	-	-	-	rs6765049	-	-	-	-	-	-	-	-	0.6158	0.885	0.4841	0.5903	0.495	0.4959	-	-	-	-
38	previously not reported	RAP2B	3:153000092:C:T	3	153000092	C	T	3:153000092:C:T	rs4680046	3	153000092	C	T	1	intergenic_variant	MODIFIER	-	-	-	-	-	-	-	-	-	-	rs4680046	-	-	-	-	-	-	-	-	0.5787	0.7625	0.4712	0.5813	0.492	0.4928	-	-	-	-
38	previously not reported	RAP2B	3:153000092:C:T	3	153000092	C	T	3:153000787:C:T	rs9289897	3	153000787	T	C	0.859011	intergenic_variant	MODIFIER	-	-	-	-	-	-	-	-	-	-	rs9289897	-	-	-	-	-	-	-	-	0.6152	0.885	0.4798	0.5903	0.495	0.4959	-	-	-	-
38	previously not reported	RAP2B	3:153000092:C:T	3	153000092	C	T	3:153000806:D:I	rs371100634	3	153000806	I	T	0.849333	intergenic_variant	MODIFIER	-	-	-	-	-	-	-	-	-	-	rs371100634	-	-	-	-	-	-	-	-	0.6124	0.8812	0.4798	0.5903	0.495	0.4867	-	-	-	-
38	previously not reported	RAP2B	3:153000092:C:T	3	153000092	C	T	3:153000810:A:G	rs145754852	3	153000810	A	G	0.849333	intergenic_variant	MODIFIER	-	-	-	-	-	-	-	-	-	-	rs145754852	-	-	-	-	-	-	-	-	0.6124	0.8812	0.4798	0.5903	0.495	0.4867	-	-	-	-
38	previously not reported	RAP2B	3:153000092:C:T	3	153000092	C	T	3:153000813:D:I	rs373386206	3	153000813	I	T	0.849333	intergenic_variant	MODIFIER	-	-	-	-	-	-	-	-	-	-	rs373386206	-	-	-	-	-	-	-	-	0.6124	0.8812	0.4798	0.5903	0.495	0.4867	-	-	-	-
38	previously not reported	RAP2B	3:153000092:C:T	3	153000092	C	T	3:153000827:D:I	rs370731090	3	153000827	I	A	0.835317	intergenic_variant	MODIFIER	-	-	-	-	-	-	-	-	-	-	rs370731090	-	-	-	-	-	-	-	-	0.6088	0.885	0.4755	0.5655	0.494	0.4928	-	-	-	-
38	previously not reported	RAP2B	3:153000092:C:T	3	153000092	C	T	3:153000830:D:I	rs374755831	3	153000830	D	I	0.833562	intergenic_variant	MODIFIER	-	-	-	-	-	-	-	-	-	-	rs374755831	-	-	-	-	-	-	-	-	0.6084	0.8843	0.4755	0.5665	0.493	0.4918	-	-	-	-
38	previously not reported	RAP2B	3:153000092:C:T	3	153000092	C	T	3:153000833:D:I	rs367925376	3	153000833	D	I	0.835975	intergenic_variant	MODIFIER	-	-	-	-	-	-	-	-	-	-	rs367925376	-	-	-	-	-	-	-	-	0.609	0.885	0.4755	0.5665	0.495	0.4918	-	-	-	-
38	previously not reported	RAP2B	3:153000092:C:T	3	153000092	C	T	3:153000834:C:T	rs199749638	3	153000834	C	T	0.835975	intergenic_variant	MODIFIER	-	-	-	-	-	-	-	-	-	-	rs199749638	-	-	-	-	-	-	-	-	0.609	0.885	0.4755	0.5665	0.495	0.4918	-	-	-	-
38	previously not reported	RAP2B	3:153000092:C:T	3	153000092	C	T	3:153000932:G:T	rs9289898	3	153000932	G	T	0.859011	intergenic_variant	MODIFIER	-	-	-	-	-	-	-	-	-	-	rs9289898	-	-	-	-	-	-	-	-	0.6152	0.885	0.4798	0.5903	0.495	0.4959	-	-	-	-
39	previously not reported*	MLF1	3:158333891:A:G	3	158333891	A	G	3:158286103:C:T	rs7613814	3	158286103	C	T	0.890442	upstream_gene_variant	MODIFIER	MLF1	ENSG00000178053	protein_coding	-	-	-	-	-	-	-	rs7613814	2946	1	Ensembl	-	-	-	-	-	0.5679	0.7617	0.5231	0.378	0.5189	0.5838	-	-	-	-
39	previously not reported*	MLF1	3:158333891:A:G	3	158333891	A	G	3:158287455:A:G	rs2276773	3	158287455	A	G	0.890442	upstream_gene_variant	MODIFIER	MLF1	ENSG00000178053	protein_coding	-	-	-	-	-	-	-	rs2276773	1594	1	Ensembl	-	-	-	-	-	0.5687	0.7648	0.5231	0.378	0.5189	0.5838	-	-	-	-
39	previously not reported*	MLF1	3:158333891:A:G	3	158333891	A	G	3:158288810:C:G	rs9819631	3	158288810	C	G	0.894896	upstream_gene_variant	MODIFIER	MLF1	ENSG00000178053	protein_coding	-	-	-	-	-	-	-	rs9819631	239	1	Ensembl	-	-	-	-	-	0.5685	0.7632	0.5231	0.378	0.5179	0.5859	-	-	-	-
39	previously not reported*	MLF1	3:158333891:A:G	3	158333891	A	G	3:158290352:C:T	rs17629360	3	158290352	C	T	0.898123	intron_variant	MODIFIER	MLF1	ENSG00000178053	protein_coding	-	1/8	-	-	-	-	-	rs17629360	-	1	Ensembl	-	-	-	-	-	0.5711	0.7648	0.5245	0.38	0.5189	0.593	-	-	-	-
39	previously not reported*	MLF1	3:158333891:A:G	3	158333891	A	G	3:158290565:A:G	rs62287933	3	158290565	A	G	0.898123	intron_variant	MODIFIER	MLF1	ENSG00000178053	protein_coding	-	1/8	-	-	-	-	-	rs62287933	-	1	Ensembl	-	-	-	-	-	0.5711	0.764	0.5245	0.381	0.5189	0.593	-	-	-	-
39	previously not reported*	MLF1	3:158333891:A:G	3	158333891	A	G	3:158290607:G:T	rs17629390	3	158290607	T	G	0.898123	intron_variant	MODIFIER	MLF1	ENSG00000178053	protein_coding	-	1/8	-	-	-	-	-	rs17629390	-	1	Ensembl	-	-	-	-	-	0.5709	0.764	0.5245	0.38	0.5189	0.593	-	-	-	-
39	previously not reported*	MLF1	3:158333891:A:G	3	158333891	A	G	3:158290717:C:T	rs17629414	3	158290717	T	C	0.898123	intron_variant	MODIFIER	MLF1	ENSG00000178053	protein_coding	-	1/8	-	-	-	-	-	rs17629414	-	1	Ensembl	-	-	-	-	-	0.5711	0.764	0.5259	0.38	0.5189	0.593	-	-	-	-
39	previously not reported*	MLF1	3:158333891:A:G	3	158333891	A	G	3:158291055:G:T	rs4680445	3	158291055	T	G	0.898123	intron_variant	MODIFIER	MLF1	ENSG00000178053	protein_coding	-	1/8	-	-	-	-	-	rs4680445	-	1	Ensembl	-	-	-	-	-	0.5709	0.764	0.5245	0.38	0.5189	0.593	-	-	-	-
39	previously not reported*	MLF1	3:158333891:A:G	3	158333891	A	G	3:158295170:C:T	rs6779426	3	158295170	C	T	0.894101	intron_variant	MODIFIER	MLF1	ENSG00000178053	protein_coding	-	1/8	-	-	-	-	-	rs6779426	-	1	Ensembl	-	-	-	-	-	0.5751	0.764	0.5245	0.3849	0.5199	0.6084	-	-	-	-
39	previously not reported*	MLF1	3:158333891:A:G	3	158333891	A	G	3:158295171:C:T	rs6792449	3	158295171	T	C	0.894101	intron_variant	MODIFIER	MLF1	ENSG00000178053	protein_coding	-	1/8	-	-	-	-	-	rs6792449	-	1	Ensembl	-	-	-	-	-	0.5715	0.764	0.5245	0.381	0.5199	0.5941	-	-	-	-
39	previously not reported*	MLF1	3:158333891:A:G	3	158333891	A	G	3:158296916:C:T	rs7631310	3	158296916	C	T	0.898123	intron_variant	MODIFIER	MLF1	ENSG00000178053	protein_coding	-	1/8	-	-	-	-	-	rs7631310	-	1	Ensembl	-	-	-	-	-	0.5711	0.764	0.5245	0.381	0.5189	0.593	-	-	-	-
39	previously not reported*	MLF1	3:158333891:A:G	3	158333891	A	G	3:158297940:G:T	rs2115943	3	158297940	T	G	0.898123	intron_variant	MODIFIER	MLF1	ENSG00000178053	protein_coding	-	1/8	-	-	-	-	-	rs2115943	-	1	Ensembl	-	-	-	-	-	0.5713	0.764	0.5245	0.3819	0.5189	0.593	-	-	-	-
39	previously not reported*	MLF1	3:158333891:A:G	3	158333891	A	G	3:158298005:C:G	rs1369563	3	158298005	C	G	0.898123	intron_variant	MODIFIER	MLF1	ENSG00000178053	protein_coding	-	1/8	-	-	-	-	-	rs1369563	-	1	Ensembl	-	-	-	-	-	0.5711	0.764	0.5245	0.381	0.5189	0.593	-	-	-	-
39	previously not reported*	MLF1	3:158333891:A:G	3	158333891	A	G	3:158298615:C:T	rs9844502	3	158298615	C	T	0.898123	intron_variant	MODIFIER	MLF1	ENSG00000178053	protein_coding	-	1/8	-	-	-	-	-	rs9844502	-	1	Ensembl	-	-	-	-	-	0.5711	0.764	0.5245	0.381	0.5189	0.593	-	-	-	-
39	previously not reported*	MLF1	3:158333891:A:G	3	158333891	A	G	3:158298703:C:T	rs9864508	3	158298703	T	C	0.898123	intron_variant	MODIFIER	MLF1	ENSG00000178053	protein_coding	-	1/8	-	-	-	-	-	rs9864508	-	1	Ensembl	-	-	-	-	-	0.5711	0.764	0.5245	0.381	0.5189	0.593	-	-	-	-
39	previously not reported*	MLF1	3:158333891:A:G	3	158333891	A	G	3:158298883:C:G	rs9848908	3	158298883	G	C	0.898123	intron_variant	MODIFIER	MLF1	ENSG00000178053	protein_coding	-	1/8	-	-	-	-	-	rs9848908	-	1	Ensembl	-	-	-	-	-	0.5711	0.764	0.5245	0.381	0.5189	0.593	-	-	-	-
39	previously not reported*	MLF1	3:158333891:A:G	3	158333891	A	G	3:158300971:A:G	rs6764872	3	158300971	G	A	0.898123	intron_variant	MODIFIER	MLF1	ENSG00000178053	protein_coding	-	2/8	-	-	-	-	-	rs6764872	-	1	Ensembl	-	-	-	-	-	0.5749	0.764	0.5245	0.3849	0.5189	0.6084	-	-	-	-
39	previously not reported*	MLF1	3:158333891:A:G	3	158333891	A	G	3:158301160:C:T	rs6777711	3	158301160	T	C	0.898123	intron_variant	MODIFIER	MLF1	ENSG00000178053	protein_coding	-	2/8	-	-	-	-	-	rs6777711	-	1	Ensembl	-	-	-	-	-	0.5711	0.764	0.5245	0.381	0.5189	0.593	-	-	-	-
39	previously not reported*	MLF1	3:158333891:A:G	3	158333891	A	G	3:158302517:C:T	rs9810339	3	158302517	T	C	0.889254	intron_variant	MODIFIER	MLF1	ENSG00000178053	protein_coding	-	2/8	-	-	-	-	-	rs9810339	-	1	Ensembl	-	-	-	-	-	0.5641	0.7375	0.5245	0.381	0.5209	0.591	-	-	-	-
39	previously not reported*	MLF1	3:158333891:A:G	3	158333891	A	G	3:158304600:D:I	rs10624254	3	158304600	D	I	0.893681	intron_variant	MODIFIER	MLF1	ENSG00000178053	protein_coding	-	2/8	-	-	-	-	-	rs10624254	-	1	Ensembl	-	-	-	-	-	0.5711	0.764	0.5245	0.3819	0.5199	0.591	-	-	-	-
39	previously not reported*	MLF1	3:158333891:A:G	3	158333891	A	G	3:158306414:A:G	rs2886037	3	158306414	G	A	0.834605	intron_variant	MODIFIER	MLF1	ENSG00000178053	protein_coding	-	2/8	-	-	-	-	-	rs2886037	-	1	Ensembl	-	-	-	-	-	0.5453	0.711	0.4971	0.372	0.5149	0.5654	-	-	-	-
39	previously not reported*	MLF1	3:158333891:A:G	3	158333891	A	G	3:158306627:A:G	rs1075551	3	158306627	A	G	0.898123	intron_variant	MODIFIER	MLF1	ENSG00000178053	protein_coding	-	2/8	-	-	-	-	-	rs1075551	-	1	Ensembl	-	-	-	-	-	0.5713	0.764	0.5245	0.381	0.5189	0.5941	-	-	-	-
39	previously not reported*	MLF1	3:158333891:A:G	3	158333891	A	G	3:158307511:C:T	rs6788285	3	158307511	C	T	0.898123	intron_variant	MODIFIER	MLF1	ENSG00000178053	protein_coding	-	2/8	-	-	-	-	-	rs6788285	-	1	Ensembl	-	-	-	-	-	0.5715	0.7648	0.5259	0.381	0.5189	0.593	-	-	-	-
39	previously not reported*	MLF1	3:158333891:A:G	3	158333891	A	G	3:158307512:A:G	rs6763812	3	158307512	A	G	0.898123	intron_variant	MODIFIER	MLF1	ENSG00000178053	protein_coding	-	2/8	-	-	-	-	-	rs6763812	-	1	Ensembl	-	-	-	-	-	0.5715	0.7648	0.5259	0.381	0.5189	0.593	-	-	-	-
39	previously not reported*	MLF1	3:158333891:A:G	3	158333891	A	G	3:158310153:A:G	rs6771248	3	158310153	A	G	0.898123	intron_variant	MODIFIER	MLF1	ENSG00000178053	protein_coding	-	2/8	-	-	-	-	-	rs6771248	-	1	Ensembl	-	-	-	-	-	0.5709	0.764	0.5245	0.381	0.5189	0.592	-	-	-	-
39	previously not reported*	MLF1	3:158333891:A:G	3	158333891	A	G	3:158310846:A:G	rs3765025	3	158310846	A	G	0.893681	intron_variant	MODIFIER	MLF1	ENSG00000178053	protein_coding	-	3/8	-	-	-	-	-	rs3765025	-	1	Ensembl	-	-	-	-	-	0.5711	0.764	0.5231	0.3819	0.5199	0.592	-	-	-	-
39	previously not reported*	MLF1	3:158333891:A:G	3	158333891	A	G	3:158311547:A:G	rs1836688	3	158311547	A	G	0.898123	intron_variant	MODIFIER	MLF1	ENSG00000178053	protein_coding	-	4/8	-	-	-	-	-	rs1836688	-	1	Ensembl	-	-	-	-	-	0.5709	0.764	0.5245	0.381	0.5189	0.592	-	-	-	-
39	previously not reported*	MLF1	3:158333891:A:G	3	158333891	A	G	3:158312262:D:I	rs5853833	3	158312262	D	I	0.898123	intron_variant	MODIFIER	MLF1	ENSG00000178053	protein_coding	-	4/8	-	-	-	-	-	rs5853833	-	1	Ensembl	-	-	-	-	-	0.5707	0.7632	0.5245	0.381	0.5189	0.592	-	-	-	-
39	previously not reported*	MLF1	3:158333891:A:G	3	158333891	A	G	3:158313583:C:T	rs6803608	3	158313583	T	C	0.893681	intron_variant	MODIFIER	MLF1	ENSG00000178053	protein_coding	-	4/8	-	-	-	-	-	rs6803608	-	1	Ensembl	-	-	-	-	-	0.5711	0.764	0.5245	0.381	0.5199	0.592	-	-	-	-
39	previously not reported*	MLF1	3:158333891:A:G	3	158333891	A	G	3:158316650:A:G	rs12107643	3	158316650	G	A	0.976015	intron_variant	MODIFIER	MLF1	ENSG00000178053	protein_coding	-	6/8	-	-	-	-	-	rs12107643	-	1	Ensembl	-	-	-	-	-	0.5739	0.7557	0.5274	0.381	0.5378	0.5971	-	-	-	-
39	previously not reported*	MLF1	3:158333891:A:G	3	158333891	A	G	3:158317365:A:T	rs2364274	3	158317365	T	A	1	intron_variant	MODIFIER	MLF1	ENSG00000178053	protein_coding	-	6/8	-	-	-	-	-	rs2364274	-	1	Ensembl	-	-	-	-	-	0.5765	0.7595	0.5303	0.381	0.5437	0.5971	-	-	-	-
39	previously not reported*	MLF1	3:158333891:A:G	3	158333891	A	G	3:158318222:D:I	rs3046592	3	158318222	D	I	1	intron_variant	MODIFIER	MLF1	ENSG00000178053	protein_coding	-	7/8	-	-	-	-	-	rs3046592	-	1	Ensembl	-	-	-	-	-	0.5761	0.7595	0.5303	0.381	0.5437	0.5951	-	-	-	-
39	previously not reported*	MLF1	3:158333891:A:G	3	158333891	A	G	3:158318361:D:I	rs4020788	3	158318361	D	I	1	intron_variant	MODIFIER	MLF1	ENSG00000178053	protein_coding	-	7/8	-	-	-	-	-	rs4020788	-	1	Ensembl	-	-	-	-	-	0.5765	0.7595	0.5303	0.381	0.5437	0.5971	-	-	-	-
39	previously not reported*	MLF1	3:158333891:A:G	3	158333891	A	G	3:158319535:D:I	rs10637775	3	158319535	D	I	0.991908	intron_variant	MODIFIER	MLF1	ENSG00000178053	protein_coding	-	7/8	-	-	-	-	-	rs10637775	-	1	Ensembl	-	-	-	-	-	0.5755	0.7579	0.5288	0.381	0.5417	0.5971	-	-	-	-
39	previously not reported*	MLF1	3:158333891:A:G	3	158333891	A	G	3:158320597:C:T	rs4875	3	158320597	T	C	1	splice_region_variant,synonymous_variant	LOW	MLF1	ENSG00000178053	protein_coding	8/9	-	930	663	221	S	agT/agC	rs4875	-	1	Ensembl	-	-	-	0.00429762914477414	0.14	0.5765	0.7595	0.5303	0.381	0.5437	0.5971	-	-	-	17975119,16175505
39	previously not reported*	MLF1	3:158333891:A:G	3	158333891	A	G	3:158322174:A:G	rs6800914	3	158322174	G	A	1	intron_variant	MODIFIER	MLF1	ENSG00000178053	protein_coding	-	8/8	-	-	-	-	-	rs6800914	-	1	Ensembl	-	-	-	-	-	0.5765	0.7595	0.5303	0.381	0.5437	0.5971	-	-	-	-
39	previously not reported*	MLF1	3:158333891:A:G	3	158333891	A	G	3:158323212:A:G	rs6804259	3	158323212	G	A	1	downstream_gene_variant	MODIFIER	MLF1	ENSG00000178053	protein_coding	-	-	-	-	-	-	-	rs6804259	22	1	Ensembl	-	-	-	-	-	0.5765	0.7595	0.5303	0.381	0.5437	0.5971	-	-	-	-
39	previously not reported*	MLF1	3:158333891:A:G	3	158333891	A	G	3:158328966:A:C	rs3851363	3	158328966	C	A	0.995959	downstream_gene_variant	MODIFIER	MLF1	4291	protein_coding	-	-	-	-	-	-	-	rs3851363	4717	1	RefSeq	-	-	-	-	-	0.5769	0.7595	0.5303	0.381	0.5447	0.5982	-	-	-	-
39	previously not reported*	MLF1	3:158333891:A:G	3	158333891	A	G	3:158328969:A:T	rs3851362	3	158328969	A	T	1	downstream_gene_variant	MODIFIER	MLF1	4291	protein_coding	-	-	-	-	-	-	-	rs3851362	4720	1	RefSeq	-	-	-	-	-	0.5749	0.7572	0.5288	0.378	0.5437	0.5961	-	-	-	-
39	previously not reported*	MLF1	3:158333891:A:G	3	158333891	A	G	3:158329022:A:G	rs3851361	3	158329022	G	A	1	downstream_gene_variant	MODIFIER	MLF1	4291	protein_coding	-	-	-	-	-	-	-	rs3851361	4773	1	RefSeq	-	-	-	-	-	0.5765	0.7595	0.5303	0.381	0.5437	0.5971	-	-	-	-
39	previously not reported*	MLF1	3:158333891:A:G	3	158333891	A	G	3:158329529:A:G	rs6803047	3	158329529	A	G	1	upstream_gene_variant	MODIFIER	MTAPP1	ENSG00000243025	processed_pseudogene	-	-	-	-	-	-	-	rs6803047	883	-1	Ensembl	-	-	-	-	-	0.5767	0.7595	0.5303	0.381	0.5437	0.5982	-	-	-	-
39	previously not reported*	MLF1	3:158333891:A:G	3	158333891	A	G	3:158329923:C:T	rs3845272	3	158329923	T	C	1	upstream_gene_variant	MODIFIER	MTAPP1	ENSG00000243025	processed_pseudogene	-	-	-	-	-	-	-	rs3845272	1277	-1	Ensembl	-	-	-	-	-	0.5765	0.7595	0.5303	0.381	0.5437	0.5971	-	-	-	-
39	previously not reported*	MLF1	3:158333891:A:G	3	158333891	A	G	3:158331938:A:T	rs10154979	3	158331938	T	A	1	upstream_gene_variant	MODIFIER	MTAPP1	ENSG00000243025	processed_pseudogene	-	-	-	-	-	-	-	rs10154979	3292	-1	Ensembl	-	-	-	-	-	0.5697	0.7201	0.5259	0.3849	0.5437	0.6145	-	-	-	-
39	previously not reported*	MLF1	3:158333891:A:G	3	158333891	A	G	3:158332053:C:T	rs10154980	3	158332053	T	C	1	upstream_gene_variant	MODIFIER	MTAPP1	ENSG00000243025	processed_pseudogene	-	-	-	-	-	-	-	rs10154980	3407	-1	Ensembl	-	-	-	-	-	0.5717	0.7421	0.5288	0.381	0.5437	0.5971	-	-	-	-
39	previously not reported*	MLF1	3:158333891:A:G	3	158333891	A	G	3:158333072:D:I	rs139175477	3	158333072	I	A	1	upstream_gene_variant	MODIFIER	MTAPP1	ENSG00000243025	processed_pseudogene	-	-	-	-	-	-	-	rs139175477	4427	-1	Ensembl	-	-	-	-	-	0.5717	0.7421	0.5288	0.381	0.5437	0.5971	-	-	-	-
39	previously not reported*	MLF1	3:158333891:A:G	3	158333891	A	G	3:158333597:D:I	rs55971959	3	158333597	D	I	0.987911	upstream_gene_variant	MODIFIER	MTAPP1	ENSG00000243025	processed_pseudogene	-	-	-	-	-	-	-	rs55971959	4951	-1	Ensembl	-	-	-	-	-	0.5312	0.5968	0.5245	0.38	0.5408	0.593	-	-	-	-
39	previously not reported*	MLF1	3:158333891:A:G	3	158333891	A	G	3:158333891:A:G	rs6799180	3	158333891	A	G	1	intergenic_variant	MODIFIER	-	-	-	-	-	-	-	-	-	-	rs6799180	-	-	-	-	-	-	-	-	0.5717	0.7421	0.5288	0.381	0.5437	0.5971	-	-	-	-
39	previously not reported*	MLF1	3:158333891:A:G	3	158333891	A	G	3:158334053:D:I	rs34081891	3	158334053	D	I	1	intergenic_variant	MODIFIER	-	-	-	-	-	-	-	-	-	-	rs34081891	-	-	-	-	-	-	-	-	0.5717	0.7421	0.5288	0.381	0.5437	0.5971	-	-	-	-
39	previously not reported*	MLF1	3:158333891:A:G	3	158333891	A	G	3:158335738:A:G	rs7649265	3	158335738	A	G	1	intergenic_variant	MODIFIER	-	-	-	-	-	-	-	-	-	-	rs7649265	-	-	-	-	-	-	-	-	0.5717	0.7421	0.5288	0.381	0.5437	0.5971	-	-	-	-
39	previously not reported*	MLF1	3:158333891:A:G	3	158333891	A	G	3:158336068:D:I	rs112959528	3	158336068	D	I	1	intergenic_variant	MODIFIER	-	-	-	-	-	-	-	-	-	-	rs112959528	-	-	-	-	-	-	-	-	0.5717	0.7421	0.5288	0.381	0.5437	0.5971	-	-	-	-
39	previously not reported*	MLF1	3:158333891:A:G	3	158333891	A	G	3:158336158:D:I	rs150387563	3	158336158	D	I	1	intergenic_variant	MODIFIER	-	-	-	-	-	-	-	-	-	-	rs150387563	-	-	-	-	-	-	-	-	0.5717	0.7421	0.5288	0.381	0.5437	0.5971	-	-	-	-
39	previously not reported*	MLF1	3:158333891:A:G	3	158333891	A	G	3:158336399:A:G	rs6441209	3	158336399	G	A	1	intergenic_variant	MODIFIER	-	-	-	-	-	-	-	-	-	-	rs6441209	-	-	-	-	-	-	-	-	0.5755	0.7421	0.5288	0.3849	0.5437	0.6125	-	-	-	-
39	previously not reported*	MLF1	3:158333891:A:G	3	158333891	A	G	3:158336517:A:G	rs6441210	3	158336517	G	A	1	intergenic_variant	MODIFIER	-	-	-	-	-	-	-	-	-	-	rs6441210	-	-	-	-	-	-	-	-	0.5717	0.7421	0.5288	0.381	0.5437	0.5971	-	-	-	-
39	previously not reported*	MLF1	3:158333891:A:G	3	158333891	A	G	3:158337230:C:T	rs6785523	3	158337230	C	T	1	intergenic_variant	MODIFIER	-	-	-	-	-	-	-	-	-	-	rs6785523	-	-	-	-	-	-	-	-	-	-	-	-	-	-	-	-	-	-
39	previously not reported*	MLF1	3:158333891:A:G	3	158333891	A	G	3:158337231:A:C	rs6785524	3	158337231	C	A	1	intergenic_variant	MODIFIER	-	-	-	-	-	-	-	-	-	-	rs6785524	-	-	-	-	-	-	-	-	0.5721	0.7421	0.5288	0.3819	0.5437	0.5982	-	-	-	-
39	previously not reported*	MLF1	3:158333891:A:G	3	158333891	A	G	3:158338335:C:T	rs6801933	3	158338335	T	C	0.991918	intergenic_variant	MODIFIER	-	-	-	-	-	-	-	-	-	-	rs6801933	-	-	-	-	-	-	-	-	0.5721	0.7421	0.5288	0.381	0.5457	0.5971	-	-	-	-
39	previously not reported*	MLF1	3:158333891:A:G	3	158333891	A	G	3:158339536:C:T	rs62286609	3	158339536	T	C	0.991918	downstream_gene_variant	MODIFIER	RP11-79M21.3	ENSG00000243165	processed_pseudogene	-	-	-	-	-	-	-	rs62286609	4909	-1	Ensembl	-	-	-	-	-	0.5721	0.7421	0.5288	0.381	0.5457	0.5971	-	-	-	-
39	previously not reported*	MLF1	3:158333891:A:G	3	158333891	A	G	3:158340865:C:T	rs12635976	3	158340865	C	T	0.991918	downstream_gene_variant	MODIFIER	RP11-79M21.3	ENSG00000243165	processed_pseudogene	-	-	-	-	-	-	-	rs12635976	3580	-1	Ensembl	-	-	-	-	-	0.5721	0.7421	0.5288	0.381	0.5457	0.5971	-	-	-	-
39	previously not reported*	MLF1	3:158333891:A:G	3	158333891	A	G	3:158345671:C:T	rs7653826	3	158345671	T	C	0.991918	upstream_gene_variant	MODIFIER	RP11-79M21.3	ENSG00000243165	processed_pseudogene	-	-	-	-	-	-	-	rs7653826	1033	-1	Ensembl	-	-	-	-	-	0.5379	0.6014	0.5231	0.3849	0.5457	0.6125	-	-	-	-
39	previously not reported*	MLF1	3:158333891:A:G	3	158333891	A	G	3:158346425:A:G	rs6441212	3	158346425	A	G	0.991918	upstream_gene_variant	MODIFIER	RP11-79M21.3	ENSG00000243165	processed_pseudogene	-	-	-	-	-	-	-	rs6441212	1787	-1	Ensembl	-	-	-	-	-	0.5381	0.6021	0.5231	0.3849	0.5457	0.6125	-	-	-	-
39	previously not reported*	MLF1	3:158333891:A:G	3	158333891	A	G	3:158350118:C:T	rs4680449	3	158350118	T	C	0.991918	intergenic_variant	MODIFIER	-	-	-	-	-	-	-	-	-	-	rs4680449	-	-	-	-	-	-	-	-	0.5312	0.5764	0.5216	0.3849	0.5457	0.6125	-	-	-	-
39	previously not reported*	MLF1	3:158333891:A:G	3	158333891	A	G	3:158362441:C:T	rs1864507	3	158362441	T	C	1	synonymous_variant	LOW	GFM1	ENSG00000168827	protein_coding	1/18	-	375	18	6	A	gcT/gcC	rs1864507	-	1	Ensembl	-	-	-	-	-	0.5831	0.7708	0.5303	0.3849	0.5437	0.6115	benign	-	1	-
39	previously not reported*	MLF1	3:158333891:A:G	3	158333891	A	G	3:158365719:C:T	rs6781342	3	158365719	C	T	1	intron_variant	MODIFIER	GFM1	ENSG00000168827	protein_coding	-	4/17	-	-	-	-	-	rs6781342	-	1	Ensembl	-	-	-	-	-	0.5833	0.7708	0.5303	0.3849	0.5437	0.6125	-	-	-	-
39	previously not reported*	MLF1	3:158333891:A:G	3	158333891	A	G	3:158366206:A:G	rs1864503	3	158366206	A	G	1	intron_variant	MODIFIER	GFM1	ENSG00000168827	protein_coding	-	4/17	-	-	-	-	-	rs1864503	-	1	Ensembl	-	-	-	-	-	0.5835	0.7708	0.5303	0.3849	0.5437	0.6135	-	-	-	-
39	previously not reported*	MLF1	3:158333891:A:G	3	158333891	A	G	3:158366900:A:G	rs2303909	3	158366900	G	A	1	missense_variant	MODERATE	GFM1	ENSG00000168827	protein_coding	5/18	-	1000	643	215	V/I	Gta/Ata	rs2303909	-	1	Ensembl	tolerated(0.44)	benign(0.013)	neutral(0.013)	-	-	0.5833	0.7708	0.5303	0.3849	0.5437	0.6125	benign	-	1	-
39	previously not reported*	MLF1	3:158333891:A:G	3	158333891	A	G	3:158368524:A:C	rs12639052	3	158368524	A	C	0.980091	intron_variant	MODIFIER	GFM1	ENSG00000168827	protein_coding	-	5/17	-	-	-	-	-	rs12639052	-	1	Ensembl	-	-	-	-	-	-	0.7708	0.6599	0.5833	0.5487	0.6166	-	-	-	-
39	previously not reported*	MLF1	3:158333891:A:G	3	158333891	A	G	3:158373930:D:I	rs58800295	3	158373930	I	G	0.995946	intron_variant	MODIFIER	GFM1	ENSG00000168827	protein_coding	-	8/17	-	-	-	-	-	rs58800295	-	1	Ensembl	-	-	-	-	-	0.5751	0.7421	0.5288	0.3849	0.5427	0.6115	-	-	-	-
39	previously not reported*	MLF1	3:158333891:A:G	3	158333891	A	G	3:158374017:A:G	rs4680450	3	158374017	G	A	1	intron_variant	MODIFIER	GFM1	ENSG00000168827	protein_coding	-	8/17	-	-	-	-	-	rs4680450	-	1	Ensembl	-	-	-	-	-	0.5833	0.7716	0.5303	0.3839	0.5437	0.6125	-	-	-	-
39	previously not reported*	MLF1	3:158333891:A:G	3	158333891	A	G	3:158374131:A:G	rs4680451	3	158374131	A	G	1	intron_variant	MODIFIER	GFM1	ENSG00000168827	protein_coding	-	8/17	-	-	-	-	-	rs4680451	-	1	Ensembl	-	-	-	-	-	0.5833	0.7716	0.5303	0.3839	0.5437	0.6125	-	-	-	-
39	previously not reported*	MLF1	3:158333891:A:G	3	158333891	A	G	3:158374391:D:I	rs34850894	3	158374391	D	I	1	intron_variant	MODIFIER	GFM1	ENSG00000168827	protein_coding	-	8/17	-	-	-	-	-	rs34850894	-	1	Ensembl	-	-	-	-	-	0.5833	0.7716	0.5303	0.3839	0.5437	0.6125	-	-	-	-
39	previously not reported*	MLF1	3:158333891:A:G	3	158333891	A	G	3:158374709:C:T	rs9819567	3	158374709	T	C	1	intron_variant	MODIFIER	GFM1	ENSG00000168827	protein_coding	-	8/17	-	-	-	-	-	rs9819567	-	1	Ensembl	-	-	-	-	-	0.5833	0.7716	0.5303	0.3839	0.5437	0.6125	-	-	-	-
39	previously not reported*	MLF1	3:158333891:A:G	3	158333891	A	G	3:158377554:G:T	rs4680452	3	158377554	G	T	1	intron_variant	MODIFIER	GFM1	ENSG00000168827	protein_coding	-	9/17	-	-	-	-	-	rs4680452	-	1	Ensembl	-	-	-	-	-	0.5831	0.7708	0.5303	0.3849	0.5437	0.6115	-	-	-	-
39	previously not reported*	MLF1	3:158333891:A:G	3	158333891	A	G	3:158377797:C:G	rs4680453	3	158377797	C	G	1	intron_variant	MODIFIER	GFM1	ENSG00000168827	protein_coding	-	9/17	-	-	-	-	-	rs4680453	-	1	Ensembl	-	-	-	-	-	-	0.7474	0.5288	0.3839	0.5437	0.6125	-	-	-	-
39	previously not reported*	MLF1	3:158333891:A:G	3	158333891	A	G	3:158382093:A:G	rs891464	3	158382093	G	A	1	intron_variant	MODIFIER	GFM1	ENSG00000168827	protein_coding	-	11/17	-	-	-	-	-	rs891464	-	1	Ensembl	-	-	-	-	-	0.5831	0.7716	0.5303	0.3839	0.5437	0.6115	-	-	-	-
39	previously not reported*	MLF1	3:158333891:A:G	3	158333891	A	G	3:158388780:C:T	rs8455	3	158388780	T	C	1	missense_variant	MODERATE	LXN	ENSG00000079257	protein_coding	2/6	-	373	158	53	H/R	cAc/cGc	rs8455	-	-1	Ensembl	tolerated(0.21)	benign(0.001)	neutral(0.044)	-	-	0.5767	0.7474	0.5288	0.3839	0.5437	0.6125	-	-	-	16175505,21108794
39	previously not reported*	MLF1	3:158333891:A:G	3	158333891	A	G	3:158391919:C:G	rs28481597	3	158391919	C	G	1	intron_variant	MODIFIER	GFM1	ENSG00000168827	protein_coding	-	13/17	-	-	-	-	-	rs28481597	-	1	Ensembl	-	-	-	-	-	0.5833	0.7716	0.5303	0.3839	0.5437	0.6125	-	-	-	-
39	previously not reported*	MLF1	3:158333891:A:G	3	158333891	A	G	3:158394013:A:G	rs6441220	3	158394013	A	G	1	intron_variant	MODIFIER	GFM1	ENSG00000168827	protein_coding	-	13/17	-	-	-	-	-	rs6441220	-	1	Ensembl	-	-	-	-	-	0.5833	0.7716	0.5303	0.3839	0.5437	0.6125	-	-	-	-
39	previously not reported*	MLF1	3:158333891:A:G	3	158333891	A	G	3:158394944:A:G	rs6802317	3	158394944	A	G	1	intron_variant	MODIFIER	GFM1	ENSG00000168827	protein_coding	-	13/17	-	-	-	-	-	rs6802317	-	1	Ensembl	-	-	-	-	-	0.5833	0.7716	0.5303	0.3839	0.5437	0.6125	-	-	-	-
39	previously not reported*	MLF1	3:158333891:A:G	3	158333891	A	G	3:158395670:A:G	rs1602760	3	158395670	G	A	1	intron_variant	MODIFIER	GFM1	ENSG00000168827	protein_coding	-	13/17	-	-	-	-	-	rs1602760	-	1	Ensembl	-	-	-	-	-	0.5797	0.7716	0.5303	0.3839	0.5437	0.5941	-	-	-	-
39	previously not reported*	MLF1	3:158333891:A:G	3	158333891	A	G	3:158402791:D:I	rs138346088	3	158402791	D	I	1	intron_variant	MODIFIER	GFM1	ENSG00000168827	protein_coding	-	15/17	-	-	-	-	-	rs138346088	-	1	Ensembl	-	-	-	-	-	0.5833	0.7716	0.5303	0.3839	0.5437	0.6125	-	-	-	-
39	previously not reported*	MLF1	3:158333891:A:G	3	158333891	A	G	3:158404267:C:T	rs10936158	3	158404267	C	T	1	intron_variant	MODIFIER	GFM1	ENSG00000168827	protein_coding	-	15/17	-	-	-	-	-	rs10936158	-	1	Ensembl	-	-	-	-	-	0.5767	0.7474	0.5288	0.3839	0.5437	0.6125	-	-	-	-
39	previously not reported*	MLF1	3:158333891:A:G	3	158333891	A	G	3:158405217:C:T	rs9824985	3	158405217	C	T	1	intron_variant	MODIFIER	GFM1	ENSG00000168827	protein_coding	-	15/17	-	-	-	-	-	rs9824985	-	1	Ensembl	-	-	-	-	-	0.5833	0.7716	0.5303	0.3839	0.5437	0.6125	-	-	-	-
39	previously not reported*	MLF1	3:158333891:A:G	3	158333891	A	G	3:158405899:A:G	rs13324770	3	158405899	A	G	1	intron_variant	MODIFIER	GFM1	ENSG00000168827	protein_coding	-	15/17	-	-	-	-	-	rs13324770	-	1	Ensembl	-	-	-	-	-	0.5833	0.7716	0.5303	0.3839	0.5437	0.6125	-	-	-	-
39	previously not reported*	MLF1	3:158333891:A:G	3	158333891	A	G	3:158406915:A:G	rs12496174	3	158406915	A	G	1	intron_variant	MODIFIER	GFM1	ENSG00000168827	protein_coding	-	15/17	-	-	-	-	-	rs12496174	-	1	Ensembl	-	-	-	-	-	0.5833	0.7716	0.5303	0.3839	0.5437	0.6125	-	-	-	-
39	previously not reported*	MLF1	3:158333891:A:G	3	158333891	A	G	3:158407430:A:G	rs13325932	3	158407430	A	G	1	intron_variant	MODIFIER	GFM1	ENSG00000168827	protein_coding	-	15/17	-	-	-	-	-	rs13325932	-	1	Ensembl	-	-	-	-	-	0.5833	0.7716	0.5303	0.3839	0.5437	0.6125	-	-	-	-
39	previously not reported*	MLF1	3:158333891:A:G	3	158333891	A	G	3:158409482:C:T	rs1047366	3	158409482	C	T	1	3_prime_UTR_variant	MODIFIER	GFM1	ENSG00000168827	protein_coding	18/18	-	2839	-	-	-	-	rs1047366	-	1	Ensembl	-	-	-	-	-	0.5833	0.7716	0.5303	0.3839	0.5437	0.6125	benign	-	1	-
39	previously not reported*	MLF1	3:158333891:A:G	3	158333891	A	G	3:158412942:A:C	rs7609717	3	158412942	A	C	1	downstream_gene_variant	MODIFIER	GFM1	ENSG00000168827	protein_coding	-	-	-	-	-	-	-	rs7609717	2578	1	Ensembl	-	-	-	-	-	0.5833	0.7716	0.5303	0.3839	0.5437	0.6125	-	-	-	-
39	previously not reported*	MLF1	3:158333891:A:G	3	158333891	A	G	3:158413716:A:G	rs1038886	3	158413716	G	A	1	downstream_gene_variant	MODIFIER	GFM1	ENSG00000168827	protein_coding	-	-	-	-	-	-	-	rs1038886	3352	1	Ensembl	-	-	-	-	-	0.5833	0.7716	0.5303	0.3839	0.5437	0.6125	-	-	-	-
39	previously not reported*	MLF1	3:158333891:A:G	3	158333891	A	G	3:158415999:A:G	rs6772483	3	158415999	A	G	1	intron_variant	MODIFIER	RARRES1	ENSG00000118849	protein_coding	-	4/5	-	-	-	-	-	rs6772483	-	-1	Ensembl	-	-	-	-	-	0.5833	0.7716	0.5303	0.3839	0.5437	0.6125	-	-	-	-
39	previously not reported*	MLF1	3:158333891:A:G	3	158333891	A	G	3:158416466:D:I	rs11448918	3	158416466	D	I	0.913297	intron_variant	MODIFIER	RARRES1	ENSG00000118849	protein_coding	-	4/5	-	-	-	-	-	rs11448918	-	-1	Ensembl	-	-	-	-	-	0.3528	0.4697	0.3184	0.1845	0.3698	0.3753	-	-	-	-
39	previously not reported*	MLF1	3:158333891:A:G	3	158333891	A	G	3:158416646:A:C	rs7621897	3	158416646	A	C	1	intron_variant	MODIFIER	RARRES1	ENSG00000118849	protein_coding	-	4/5	-	-	-	-	-	rs7621897	-	-1	Ensembl	-	-	-	-	-	-	0.7716	0.5303	0.3839	0.5437	0.6125	-	-	-	-
39	previously not reported*	MLF1	3:158333891:A:G	3	158333891	A	G	3:158418014:A:G	rs6779431	3	158418014	A	G	0.987959	intron_variant	MODIFIER	RARRES1	ENSG00000118849	protein_coding	-	4/5	-	-	-	-	-	rs6779431	-	-1	Ensembl	-	-	-	-	-	0.5675	0.7141	0.5245	0.3829	0.5447	0.6135	-	-	-	-
39	previously not reported*	MLF1	3:158333891:A:G	3	158333891	A	G	3:158422506:A:G	rs4680457	3	158422506	G	A	1	intron_variant	MODIFIER	RARRES1	ENSG00000118849	protein_coding	-	4/5	-	-	-	-	-	rs4680457	-	-1	Ensembl	-	-	-	-	-	0.5833	0.7716	0.5303	0.3839	0.5437	0.6125	-	-	-	-
40	previously not reported	FNDC3B	3:171800256:A:G	3	171800256	A	G	3:171774601:C:G	rs17460016	3	171774601	G	C	0.806009	intron_variant	MODIFIER	FNDC3B	ENSG00000075420	protein_coding	-	1/25	-	-	-	-	-	rs17460016	-	1	Ensembl	-	-	-	-	-	0.2458	0.0567	0.379	0.2401	0.4036	0.2505	-	-	-	-
40	previously not reported	FNDC3B	3:171800256:A:G	3	171800256	A	G	3:171785168:C:G	rs9647379	3	171785168	G	C	0.82157	intron_variant	MODIFIER	FNDC3B	ENSG00000075420	protein_coding	-	1/25	-	-	-	-	-	rs9647379	-	1	Ensembl	-	-	-	-	-	0.251	0.0575	0.3804	0.2798	0.4066	0.2311	-	-	1	23583979
40	previously not reported	FNDC3B	3:171800256:A:G	3	171800256	A	G	3:171800256:A:G	rs4894803	3	171800256	A	G	1	intron_variant	MODIFIER	FNDC3B	ENSG00000075420	protein_coding	-	1/25	-	-	-	-	-	rs4894803	-	1	Ensembl	-	-	-	-	-	0.2574	0.0817	0.3732	0.2827	0.4056	0.2342	-	-	-	-
41	previously not reported	FGF12	3:192373761:A:C	3	192373761	A	C	3:192358918:A:G	rs145990404	3	192358918	G	A	0.87792	intron_variant	MODIFIER	FGF12	ENSG00000114279	protein_coding	-	1/4	-	-	-	-	-	rs145990404	-	-1	Ensembl	-	-	-	-	-	0.5551	0.472	0.4308	0.6736	0.5905	0.5971	-	-	-	-
41	previously not reported	FGF12	3:192373761:A:C	3	192373761	A	C	3:192359254:C:T	rs6806969	3	192359254	T	C	0.889951	intron_variant	MODIFIER	FGF12	ENSG00000114279	protein_coding	-	1/4	-	-	-	-	-	rs6806969	-	-1	Ensembl	-	-	-	-	-	0.5583	0.4728	0.4308	0.6736	0.5905	0.6125	-	-	-	-
41	previously not reported	FGF12	3:192373761:A:C	3	192373761	A	C	3:192359361:C:T	rs6807072	3	192359361	T	C	0.889951	intron_variant	MODIFIER	FGF12	ENSG00000114279	protein_coding	-	1/4	-	-	-	-	-	rs6807072	-	-1	Ensembl	-	-	-	-	-	0.5583	0.472	0.4308	0.6736	0.5905	0.6135	-	-	-	-
41	previously not reported	FGF12	3:192373761:A:C	3	192373761	A	C	3:192359833:C:G	rs1875735	3	192359833	C	G	0.869163	intron_variant	MODIFIER	FGF12	ENSG00000114279	protein_coding	-	1/4	-	-	-	-	-	rs1875735	-	-1	Ensembl	-	-	-	-	-	0.5679	0.503	0.4409	0.6736	0.5905	0.6135	-	-	-	21319277,23679094
41	previously not reported	FGF12	3:192373761:A:C	3	192373761	A	C	3:192359938:C:T	rs1875736	3	192359938	C	T	0.97198	intron_variant	MODIFIER	FGF12	ENSG00000114279	protein_coding	-	1/4	-	-	-	-	-	rs1875736	-	-1	Ensembl	-	-	-	-	-	0.5801	0.5106	0.4524	0.6736	0.6193	0.6278	-	-	-	-
41	previously not reported	FGF12	3:192373761:A:C	3	192373761	A	C	3:192360059:A:G	rs1875737	3	192360059	A	G	0.944807	intron_variant	MODIFIER	FGF12	ENSG00000114279	protein_coding	-	1/4	-	-	-	-	-	rs1875737	-	-1	Ensembl	-	-	-	-	-	0.5885	0.5386	0.4597	0.6736	0.6193	0.6278	-	-	-	-
41	previously not reported	FGF12	3:192373761:A:C	3	192373761	A	C	3:192360122:A:G	rs1875738	3	192360122	A	G	0.968903	intron_variant	MODIFIER	FGF12	ENSG00000114279	protein_coding	-	1/4	-	-	-	-	-	rs1875738	-	-1	Ensembl	-	-	-	-	-	0.5793	0.5068	0.4539	0.6736	0.6193	0.6278	-	-	-	-
41	previously not reported	FGF12	3:192373761:A:C	3	192373761	A	C	3:192361064:D:I	rs5855442	3	192361064	D	I	0.902574	intron_variant	MODIFIER	FGF12	ENSG00000114279	protein_coding	-	1/4	-	-	-	-	-	rs5855442	-	-1	Ensembl	-	-	-	-	-	0.5559	0.4713	0.4294	0.6736	0.5815	0.6125	-	-	-	-
41	previously not reported	FGF12	3:192373761:A:C	3	192373761	A	C	3:192361854:C:G	rs12638325	3	192361854	G	C	0.955304	intron_variant	MODIFIER	FGF12	ENSG00000114279	protein_coding	-	1/4	-	-	-	-	-	rs12638325	-	-1	Ensembl	-	-	-	-	-	-	-	-	-	-	-	-	-	-	-
41	previously not reported	FGF12	3:192373761:A:C	3	192373761	A	C	3:192362182:C:G	rs1503588	3	192362182	G	C	0.908581	intron_variant	MODIFIER	FGF12	ENSG00000114279	protein_coding	-	1/4	-	-	-	-	-	rs1503588	-	-1	Ensembl	-	-	-	-	-	0.5581	0.4766	0.4323	0.6746	0.5815	0.6135	-	-	-	-
41	previously not reported	FGF12	3:192373761:A:C	3	192373761	A	C	3:192362210:A:G	rs1503589	3	192362210	A	G	0.903206	intron_variant	MODIFIER	FGF12	ENSG00000114279	protein_coding	-	1/4	-	-	-	-	-	rs1503589	-	-1	Ensembl	-	-	-	-	-	0.5565	0.472	0.4294	0.6746	0.5815	0.6135	-	-	-	-
41	previously not reported	FGF12	3:192373761:A:C	3	192373761	A	C	3:192362352:C:T	rs6768898	3	192362352	T	C	0.985949	intron_variant	MODIFIER	FGF12	ENSG00000114279	protein_coding	-	1/4	-	-	-	-	-	rs6768898	-	-1	Ensembl	-	-	-	-	-	0.5781	0.5113	0.451	0.6736	0.6093	0.6278	-	-	-	-
41	previously not reported	FGF12	3:192373761:A:C	3	192373761	A	C	3:192362656:A:G	rs9876194	3	192362656	G	A	0.902353	intron_variant	MODIFIER	FGF12	ENSG00000114279	protein_coding	-	1/4	-	-	-	-	-	rs9876194	-	-1	Ensembl	-	-	-	-	-	0.5567	0.4735	0.4294	0.6736	0.5815	0.6135	-	-	-	-
41	previously not reported	FGF12	3:192373761:A:C	3	192373761	A	C	3:192363339:C:T	rs4592975	3	192363339	C	T	0.986728	intron_variant	MODIFIER	FGF12	ENSG00000114279	protein_coding	-	1/4	-	-	-	-	-	rs4592975	-	-1	Ensembl	-	-	-	-	-	0.5783	0.5113	0.451	0.6736	0.6103	0.6278	-	-	-	-
41	previously not reported	FGF12	3:192373761:A:C	3	192373761	A	C	3:192363417:A:G	rs4585145	3	192363417	G	A	0.955304	intron_variant	MODIFIER	FGF12	ENSG00000114279	protein_coding	-	1/4	-	-	-	-	-	rs4585145	-	-1	Ensembl	-	-	-	-	-	0.5861	0.5393	0.4539	0.6736	0.6103	0.6278	-	-	-	-
41	previously not reported	FGF12	3:192373761:A:C	3	192373761	A	C	3:192363650:A:G	rs9881554	3	192363650	G	A	0.955304	intron_variant	MODIFIER	FGF12	ENSG00000114279	protein_coding	-	1/4	-	-	-	-	-	rs9881554	-	-1	Ensembl	-	-	-	-	-	0.5861	0.5393	0.4539	0.6736	0.6103	0.6278	-	-	-	25889623
41	previously not reported	FGF12	3:192373761:A:C	3	192373761	A	C	3:192363686:C:T	rs9881315	3	192363686	C	T	0.953703	intron_variant	MODIFIER	FGF12	ENSG00000114279	protein_coding	-	1/4	-	-	-	-	-	rs9881315	-	-1	Ensembl	-	-	-	-	-	0.5857	0.5386	0.4539	0.6736	0.6103	0.6268	-	-	-	-
41	previously not reported	FGF12	3:192373761:A:C	3	192373761	A	C	3:192364321:C:T	rs3845933	3	192364321	T	C	0.956045	intron_variant	MODIFIER	FGF12	ENSG00000114279	protein_coding	-	1/4	-	-	-	-	-	rs3845933	-	-1	Ensembl	-	-	-	-	-	0.5859	0.5393	0.4539	0.6726	0.6103	0.6278	-	-	-	-
41	previously not reported	FGF12	3:192373761:A:C	3	192373761	A	C	3:192364627:A:G	rs6765708	3	192364627	G	A	0.956045	intron_variant	MODIFIER	FGF12	ENSG00000114279	protein_coding	-	1/4	-	-	-	-	-	rs6765708	-	-1	Ensembl	-	-	-	-	-	0.5859	0.5393	0.4539	0.6726	0.6103	0.6278	-	-	-	-
41	previously not reported	FGF12	3:192373761:A:C	3	192373761	A	C	3:192364664:C:T	rs6765623	3	192364664	C	T	0.956045	intron_variant	MODIFIER	FGF12	ENSG00000114279	protein_coding	-	1/4	-	-	-	-	-	rs6765623	-	-1	Ensembl	-	-	-	-	-	0.5859	0.5393	0.4539	0.6726	0.6103	0.6278	-	-	-	-
41	previously not reported	FGF12	3:192373761:A:C	3	192373761	A	C	3:192364811:C:T	rs6765738	3	192364811	C	T	0.956045	intron_variant	MODIFIER	FGF12	ENSG00000114279	protein_coding	-	1/4	-	-	-	-	-	rs6765738	-	-1	Ensembl	-	-	-	-	-	0.5859	0.5393	0.4539	0.6726	0.6103	0.6278	-	-	-	-
41	previously not reported	FGF12	3:192373761:A:C	3	192373761	A	C	3:192366059:C:G	rs9868055	3	192366059	C	G	0.904059	intron_variant	MODIFIER	FGF12	ENSG00000114279	protein_coding	-	1/4	-	-	-	-	-	rs9868055	-	-1	Ensembl	-	-	-	-	-	-	-	-	-	-	-	-	-	-	-
41	previously not reported	FGF12	3:192373761:A:C	3	192373761	A	C	3:192366329:A:C	rs9868365	3	192366329	C	A	0.986728	intron_variant	MODIFIER	FGF12	ENSG00000114279	protein_coding	-	1/4	-	-	-	-	-	rs9868365	-	-1	Ensembl	-	-	-	-	-	0.5783	0.5121	0.451	0.6726	0.6103	0.6278	-	-	-	-
41	previously not reported	FGF12	3:192373761:A:C	3	192373761	A	C	3:192366341:A:G	rs9291030	3	192366341	G	A	0.986728	intron_variant	MODIFIER	FGF12	ENSG00000114279	protein_coding	-	1/4	-	-	-	-	-	rs9291030	-	-1	Ensembl	-	-	-	-	-	0.5783	0.5121	0.451	0.6726	0.6103	0.6278	-	-	-	-
41	previously not reported	FGF12	3:192373761:A:C	3	192373761	A	C	3:192367244:C:T	rs9818359	3	192367244	T	C	0.985936	intron_variant	MODIFIER	FGF12	ENSG00000114279	protein_coding	-	1/4	-	-	-	-	-	rs9818359	-	-1	Ensembl	-	-	-	-	-	0.5785	0.5121	0.451	0.6726	0.6093	0.6299	-	-	-	-
41	previously not reported	FGF12	3:192373761:A:C	3	192373761	A	C	3:192367401:A:G	rs1503597	3	192367401	G	A	0.988285	intron_variant	MODIFIER	FGF12	ENSG00000114279	protein_coding	-	1/4	-	-	-	-	-	rs1503597	-	-1	Ensembl	-	-	-	-	-	0.5779	0.5113	0.451	0.6726	0.6093	0.6278	-	-	-	-
41	previously not reported	FGF12	3:192373761:A:C	3	192373761	A	C	3:192367417:C:T	rs4687350	3	192367417	T	C	0.988285	intron_variant	MODIFIER	FGF12	ENSG00000114279	protein_coding	-	1/4	-	-	-	-	-	rs4687350	-	-1	Ensembl	-	-	-	-	-	0.5779	0.5113	0.451	0.6726	0.6093	0.6278	-	-	-	-
41	previously not reported	FGF12	3:192373761:A:C	3	192373761	A	C	3:192367485:C:T	rs1503596	3	192367485	T	C	0.988292	intron_variant	MODIFIER	FGF12	ENSG00000114279	protein_coding	-	1/4	-	-	-	-	-	rs1503596	-	-1	Ensembl	-	-	-	-	-	-	-	-	-	-	-	-	-	-	-
41	previously not reported	FGF12	3:192373761:A:C	3	192373761	A	C	3:192367513:D:I	rs3044628	3	192367513	D	I	0.981299	intron_variant	MODIFIER	FGF12	ENSG00000114279	protein_coding	-	1/4	-	-	-	-	-	rs3044628	-	-1	Ensembl	-	-	-	-	-	0.5761	0.5098	0.4496	0.6696	0.6074	0.6268	-	-	-	-
41	previously not reported	FGF12	3:192373761:A:C	3	192373761	A	C	3:192367766:C:T	rs2134636	3	192367766	T	C	0.988285	intron_variant	MODIFIER	FGF12	ENSG00000114279	protein_coding	-	1/4	-	-	-	-	-	rs2134636	-	-1	Ensembl	-	-	-	-	-	0.5779	0.5113	0.451	0.6726	0.6093	0.6278	-	-	-	-
41	previously not reported	FGF12	3:192373761:A:C	3	192373761	A	C	3:192367902:C:G	rs2174179	3	192367902	C	G	0.988285	intron_variant	MODIFIER	FGF12	ENSG00000114279	protein_coding	-	1/4	-	-	-	-	-	rs2174179	-	-1	Ensembl	-	-	-	-	-	0.5779	0.5113	0.451	0.6726	0.6093	0.6278	-	-	-	-
41	previously not reported	FGF12	3:192373761:A:C	3	192373761	A	C	3:192369093:A:G	rs9809169	3	192369093	G	A	0.987501	intron_variant	MODIFIER	FGF12	ENSG00000114279	protein_coding	-	1/4	-	-	-	-	-	rs9809169	-	-1	Ensembl	-	-	-	-	-	0.5781	0.5113	0.451	0.6726	0.6093	0.6288	-	-	-	-
41	previously not reported	FGF12	3:192373761:A:C	3	192373761	A	C	3:192370033:A:G	rs3898006	3	192370033	G	A	0.986727	intron_variant	MODIFIER	FGF12	ENSG00000114279	protein_coding	-	1/4	-	-	-	-	-	rs3898006	-	-1	Ensembl	-	-	-	-	-	0.5779	0.5121	0.451	0.6726	0.6093	0.6268	-	-	1	17903299
41	previously not reported	FGF12	3:192373761:A:C	3	192373761	A	C	3:192370065:A:C	rs953603	3	192370065	C	A	0.906251	intron_variant	MODIFIER	FGF12	ENSG00000114279	protein_coding	-	1/4	-	-	-	-	-	rs953603	-	-1	Ensembl	-	-	-	-	-	0.5561	0.4728	0.4294	0.6726	0.5805	0.6135	-	-	-	-
41	previously not reported	FGF12	3:192373761:A:C	3	192373761	A	C	3:192370340:A:G	rs7426991	3	192370340	G	A	0.987501	intron_variant	MODIFIER	FGF12	ENSG00000114279	protein_coding	-	1/4	-	-	-	-	-	rs7426991	-	-1	Ensembl	-	-	-	-	-	0.5781	0.5113	0.4524	0.6726	0.6093	0.6278	-	-	-	-
41	previously not reported	FGF12	3:192373761:A:C	3	192373761	A	C	3:192370532:A:G	rs9815063	3	192370532	G	A	0.987506	intron_variant	MODIFIER	FGF12	ENSG00000114279	protein_coding	-	1/4	-	-	-	-	-	rs9815063	-	-1	Ensembl	-	-	-	-	-	-	0.5121	0.451	0.6726	0.6093	0.6278	-	-	-	-
41	previously not reported	FGF12	3:192373761:A:C	3	192373761	A	C	3:192370648:G:T	rs9834961	3	192370648	T	G	0.956787	intron_variant	MODIFIER	FGF12	ENSG00000114279	protein_coding	-	1/4	-	-	-	-	-	rs9834961	-	-1	Ensembl	-	-	-	-	-	-	-	-	-	-	-	-	-	-	-
41	previously not reported	FGF12	3:192373761:A:C	3	192373761	A	C	3:192370738:A:T	rs9852619	3	192370738	A	T	0.988285	intron_variant	MODIFIER	FGF12	ENSG00000114279	protein_coding	-	1/4	-	-	-	-	-	rs9852619	-	-1	Ensembl	-	-	-	-	-	0.5779	0.5113	0.451	0.6726	0.6093	0.6278	-	-	-	-
41	previously not reported	FGF12	3:192373761:A:C	3	192373761	A	C	3:192370870:C:T	rs9819020	3	192370870	C	T	0.988285	intron_variant	MODIFIER	FGF12	ENSG00000114279	protein_coding	-	1/4	-	-	-	-	-	rs9819020	-	-1	Ensembl	-	-	-	-	-	0.5779	0.5113	0.451	0.6726	0.6093	0.6278	-	-	-	-
41	previously not reported	FGF12	3:192373761:A:C	3	192373761	A	C	3:192371065:A:G	rs2366850	3	192371065	A	G	0.988285	intron_variant	MODIFIER	FGF12	ENSG00000114279	protein_coding	-	1/4	-	-	-	-	-	rs2366850	-	-1	Ensembl	-	-	-	-	-	0.5779	0.5113	0.451	0.6726	0.6093	0.6278	-	-	-	-
41	previously not reported	FGF12	3:192373761:A:C	3	192373761	A	C	3:192371185:C:T	rs2366851	3	192371185	T	C	0.987501	intron_variant	MODIFIER	FGF12	ENSG00000114279	protein_coding	-	1/4	-	-	-	-	-	rs2366851	-	-1	Ensembl	-	-	-	-	-	0.5781	0.5113	0.4524	0.6726	0.6093	0.6278	-	-	-	-
41	previously not reported	FGF12	3:192373761:A:C	3	192373761	A	C	3:192371328:C:T	rs2366852	3	192371328	T	C	0.988285	intron_variant	MODIFIER	FGF12	ENSG00000114279	protein_coding	-	1/4	-	-	-	-	-	rs2366852	-	-1	Ensembl	-	-	-	-	-	0.5779	0.5113	0.451	0.6726	0.6093	0.6278	-	-	-	-
41	previously not reported	FGF12	3:192373761:A:C	3	192373761	A	C	3:192371402:A:G	rs2886785	3	192371402	A	G	0.988285	intron_variant	MODIFIER	FGF12	ENSG00000114279	protein_coding	-	1/4	-	-	-	-	-	rs2886785	-	-1	Ensembl	-	-	-	-	-	0.5779	0.5113	0.451	0.6726	0.6093	0.6278	-	-	1	21277817
41	previously not reported	FGF12	3:192373761:A:C	3	192373761	A	C	3:192371509:D:I	rs532178798	3	192371509	D	I	0.880043	intron_variant	MODIFIER	FGF12	ENSG00000114279	protein_coding	-	1/4	-	-	-	-	-	rs532178798	-	-1	Ensembl	-	-	-	-	-	-	-	-	-	-	-	-	-	-	-
41	previously not reported	FGF12	3:192373761:A:C	3	192373761	A	C	3:192372110:A:G	rs9825096	3	192372110	G	A	0.906401	intron_variant	MODIFIER	FGF12	ENSG00000114279	protein_coding	-	1/4	-	-	-	-	-	rs9825096	-	-1	Ensembl	-	-	-	-	-	0.5557	0.4713	0.4294	0.6726	0.5805	0.6135	-	-	-	-
41	previously not reported	FGF12	3:192373761:A:C	3	192373761	A	C	3:192372207:D:I	rs11359433	3	192372207	I	T	0.98907	intron_variant	MODIFIER	FGF12	ENSG00000114279	protein_coding	-	1/4	-	-	-	-	-	rs11359433	-	-1	Ensembl	-	-	-	-	-	0.5777	0.5106	0.451	0.6726	0.6093	0.6278	-	-	-	-
41	previously not reported	FGF12	3:192373761:A:C	3	192373761	A	C	3:192372585:A:G	rs7621372	3	192372585	G	A	0.957531	intron_variant	MODIFIER	FGF12	ENSG00000114279	protein_coding	-	1/4	-	-	-	-	-	rs7621372	-	-1	Ensembl	-	-	-	-	-	0.5855	0.5393	0.4539	0.6726	0.6083	0.6278	-	-	-	-
41	previously not reported	FGF12	3:192373761:A:C	3	192373761	A	C	3:192372772:A:G	rs1503595	3	192372772	A	G	0.903212	intron_variant	MODIFIER	FGF12	ENSG00000114279	protein_coding	-	1/4	-	-	-	-	-	rs1503595	-	-1	Ensembl	-	-	-	-	-	0.5569	0.4735	0.4294	0.6756	0.5805	0.6135	-	-	-	-
41	previously not reported	FGF12	3:192373761:A:C	3	192373761	A	C	3:192372800:C:T	rs1503594	3	192372800	T	C	0.985186	intron_variant	MODIFIER	FGF12	ENSG00000114279	protein_coding	-	1/4	-	-	-	-	-	rs1503594	-	-1	Ensembl	-	-	-	-	-	-	0.5121	0.451	0.6756	0.6093	0.6278	-	-	-	-
41	previously not reported	FGF12	3:192373761:A:C	3	192373761	A	C	3:192372820:G:T	rs1503593	3	192372820	T	G	0.953089	intron_variant	MODIFIER	FGF12	ENSG00000114279	protein_coding	-	1/4	-	-	-	-	-	rs1503593	-	-1	Ensembl	-	-	-	-	-	-	-	-	-	-	-	-	-	-	-
41	previously not reported	FGF12	3:192373761:A:C	3	192373761	A	C	3:192373660:A:G	rs4234623	3	192373660	G	A	0.973038	intron_variant	MODIFIER	FGF12	ENSG00000114279	protein_coding	-	1/4	-	-	-	-	-	rs4234623	-	-1	Ensembl	-	-	-	-	-	0.5791	0.5098	0.4524	0.6736	0.6133	0.6299	-	-	-	-
41	previously not reported	FGF12	3:192373761:A:C	3	192373761	A	C	3:192373666:A:G	rs4687351	3	192373666	G	A	0.973038	intron_variant	MODIFIER	FGF12	ENSG00000114279	protein_coding	-	1/4	-	-	-	-	-	rs4687351	-	-1	Ensembl	-	-	-	-	-	0.5791	0.5098	0.4524	0.6736	0.6133	0.6299	-	-	-	-
41	previously not reported	FGF12	3:192373761:A:C	3	192373761	A	C	3:192373671:C:T	rs2886786	3	192373671	C	T	0.94125	intron_variant	MODIFIER	FGF12	ENSG00000114279	protein_coding	-	1/4	-	-	-	-	-	rs2886786	-	-1	Ensembl	-	-	-	-	-	0.5871	0.5386	0.4553	0.6736	0.6133	0.6299	-	-	-	-
41	previously not reported	FGF12	3:192373761:A:C	3	192373761	A	C	3:192373673:C:T	rs2366853	3	192373673	C	T	0.973038	intron_variant	MODIFIER	FGF12	ENSG00000114279	protein_coding	-	1/4	-	-	-	-	-	rs2366853	-	-1	Ensembl	-	-	-	-	-	0.5791	0.5098	0.4524	0.6736	0.6133	0.6299	-	-	-	-
41	previously not reported	FGF12	3:192373761:A:C	3	192373761	A	C	3:192373761:A:C	rs4687352	3	192373761	A	C	1	intron_variant	MODIFIER	FGF12	ENSG00000114279	protein_coding	-	1/4	-	-	-	-	-	rs4687352	-	-1	Ensembl	-	-	-	-	-	0.5785	0.5106	0.451	0.6726	0.6103	0.6309	-	-	-	-
41	previously not reported	FGF12	3:192373761:A:C	3	192373761	A	C	3:192373791:A:G	rs2886787	3	192373791	A	G	0.998439	intron_variant	MODIFIER	FGF12	ENSG00000114279	protein_coding	-	1/4	-	-	-	-	-	rs2886787	-	-1	Ensembl	-	-	-	-	-	0.5781	0.5098	0.451	0.6726	0.6093	0.6309	-	-	-	-
41	previously not reported	FGF12	3:192373761:A:C	3	192373761	A	C	3:192373813:A:G	rs9868627	3	192373813	A	G	0.997657	intron_variant	MODIFIER	FGF12	ENSG00000114279	protein_coding	-	1/4	-	-	-	-	-	rs9868627	-	-1	Ensembl	-	-	-	-	-	0.5787	0.5106	0.451	0.6736	0.6093	0.6319	-	-	-	-
41	previously not reported	FGF12	3:192373761:A:C	3	192373761	A	C	3:192373817:A:G	rs9868628	3	192373817	A	G	0.914391	intron_variant	MODIFIER	FGF12	ENSG00000114279	protein_coding	-	1/4	-	-	-	-	-	rs9868628	-	-1	Ensembl	-	-	-	-	-	0.5571	0.4728	0.4294	0.6736	0.5805	0.6176	-	-	-	-
41	previously not reported	FGF12	3:192373761:A:C	3	192373761	A	C	3:192374022:C:G	rs4234624	3	192374022	G	C	0.955207	intron_variant	MODIFIER	FGF12	ENSG00000114279	protein_coding	-	1/4	-	-	-	-	-	rs4234624	-	-1	Ensembl	-	-	-	-	-	0.5687	0.4781	0.4496	0.6726	0.6083	0.6278	-	-	-	-
41	previously not reported	FGF12	3:192373761:A:C	3	192373761	A	C	3:192374109:D:I	rs568490830	3	192374109	I	C	0.914383	intron_variant	MODIFIER	FGF12	ENSG00000114279	protein_coding	-	1/4	-	-	-	-	-	rs568490830	-	-1	Ensembl	-	-	-	-	-	0.5763	0.4743	0.4539	0.6726	0.6421	0.6339	-	-	-	-
41	previously not reported	FGF12	3:192373761:A:C	3	192373761	A	C	3:192374368:C:G	rs9835809	3	192374368	C	G	0.983659	intron_variant	MODIFIER	FGF12	ENSG00000114279	protein_coding	-	1/4	-	-	-	-	-	rs9835809	-	-1	Ensembl	-	-	-	-	-	0.5763	0.5076	0.4481	0.6726	0.6083	0.6278	-	-	-	-
41	previously not reported	FGF12	3:192373761:A:C	3	192373761	A	C	3:192374485:A:T	rs9873551	3	192374485	A	T	0.954391	intron_variant	MODIFIER	FGF12	ENSG00000114279	protein_coding	-	1/4	-	-	-	-	-	rs9873551	-	-1	Ensembl	-	-	-	-	-	-	-	-	-	-	-	-	-	1	21277817
41	previously not reported	FGF12	3:192373761:A:C	3	192373761	A	C	3:192375209:D:I	rs10663419	3	192375209	D	I	0.867815	intron_variant	MODIFIER	FGF12	ENSG00000114279	protein_coding	-	1/4	-	-	-	-	-	rs10663419	-	-1	Ensembl	-	-	-	-	-	0.5435	0.4758	0.4438	0.6022	0.5924	0.5951	-	-	-	-
41	previously not reported	FGF12	3:192373761:A:C	3	192373761	A	C	3:192375440:C:T	rs9813078	3	192375440	C	T	0.954428	intron_variant	MODIFIER	FGF12	ENSG00000114279	protein_coding	-	1/4	-	-	-	-	-	rs9813078	-	-1	Ensembl	-	-	-	-	-	0.5689	0.4781	0.4496	0.6726	0.6083	0.6288	-	-	-	-
41	previously not reported	FGF12	3:192373761:A:C	3	192373761	A	C	3:192375843:A:C	rs6809426	3	192375843	A	C	0.946428	intron_variant	MODIFIER	FGF12	ENSG00000114279	protein_coding	-	1/4	-	-	-	-	-	rs6809426	-	-1	Ensembl	-	-	-	-	-	0.5683	0.4773	0.4496	0.6726	0.6074	0.6278	-	-	-	-
41	previously not reported	FGF12	3:192373761:A:C	3	192373761	A	C	3:192375852:A:G	rs6809430	3	192375852	A	G	0.946428	intron_variant	MODIFIER	FGF12	ENSG00000114279	protein_coding	-	1/4	-	-	-	-	-	rs6809430	-	-1	Ensembl	-	-	-	-	-	0.5683	0.4773	0.4496	0.6726	0.6074	0.6278	-	-	-	-
41	previously not reported	FGF12	3:192373761:A:C	3	192373761	A	C	3:192375865:C:T	rs6785550	3	192375865	C	T	0.946428	intron_variant	MODIFIER	FGF12	ENSG00000114279	protein_coding	-	1/4	-	-	-	-	-	rs6785550	-	-1	Ensembl	-	-	-	-	-	0.5683	0.4773	0.4496	0.6726	0.6074	0.6278	-	-	-	-
41	previously not reported	FGF12	3:192373761:A:C	3	192373761	A	C	3:192375881:C:T	rs6798455	3	192375881	T	C	0.946428	intron_variant	MODIFIER	FGF12	ENSG00000114279	protein_coding	-	1/4	-	-	-	-	-	rs6798455	-	-1	Ensembl	-	-	-	-	-	0.5683	0.4773	0.4496	0.6726	0.6074	0.6278	-	-	-	-
41	previously not reported	FGF12	3:192373761:A:C	3	192373761	A	C	3:192375982:C:T	rs6798557	3	192375982	T	C	0.84602	intron_variant	MODIFIER	FGF12	ENSG00000114279	protein_coding	-	1/4	-	-	-	-	-	rs6798557	-	-1	Ensembl	-	-	-	-	-	0.6128	0.6362	0.4669	0.6726	0.6083	0.6278	-	-	-	-
41	previously not reported	FGF12	3:192373761:A:C	3	192373761	A	C	3:192376137:C:T	rs6798763	3	192376137	T	C	0.8445	intron_variant	MODIFIER	FGF12	ENSG00000114279	protein_coding	-	1/4	-	-	-	-	-	rs6798763	-	-1	Ensembl	-	-	-	-	-	0.6124	0.6339	0.4669	0.6726	0.6083	0.6288	-	-	-	-
41	previously not reported	FGF12	3:192373761:A:C	3	192373761	A	C	3:192376139:A:C	rs6809774	3	192376139	A	C	0.953613	intron_variant	MODIFIER	FGF12	ENSG00000114279	protein_coding	-	1/4	-	-	-	-	-	rs6809774	-	-1	Ensembl	-	-	-	-	-	0.5691	0.4788	0.4496	0.6726	0.6083	0.6288	-	-	-	-
41	previously not reported	FGF12	3:192373761:A:C	3	192373761	A	C	3:192376619:C:T	rs7645453	3	192376619	T	C	0.932091	intron_variant	MODIFIER	FGF12	ENSG00000114279	protein_coding	-	1/4	-	-	-	-	-	rs7645453	-	-1	Ensembl	-	-	-	-	-	0.5743	0.4796	0.4496	0.6746	0.6103	0.6503	-	-	-	-
41	previously not reported	FGF12	3:192373761:A:C	3	192373761	A	C	3:192376632:C:T	rs7633689	3	192376632	C	T	0.931289	intron_variant	MODIFIER	FGF12	ENSG00000114279	protein_coding	-	1/4	-	-	-	-	-	rs7633689	-	-1	Ensembl	-	-	-	-	-	0.5745	0.4803	0.4496	0.6746	0.6103	0.6503	-	-	-	-
41	previously not reported	FGF12	3:192373761:A:C	3	192373761	A	C	3:192376925:C:T	rs6788998	3	192376925	C	T	0.954391	intron_variant	MODIFIER	FGF12	ENSG00000114279	protein_coding	-	1/4	-	-	-	-	-	rs6788998	-	-1	Ensembl	-	-	-	-	-	0.5689	0.4788	0.4496	0.6726	0.6083	0.6278	-	-	-	-
41	previously not reported	FGF12	3:192373761:A:C	3	192373761	A	C	3:192377208:A:G	rs6789503	3	192377208	G	A	0.8898	intron_variant	MODIFIER	FGF12	ENSG00000114279	protein_coding	-	1/4	-	-	-	-	-	rs6789503	-	-1	Ensembl	-	-	-	-	-	0.5595	0.472	0.4294	0.6726	0.5795	0.6329	-	-	-	-
41	previously not reported	FGF12	3:192373761:A:C	3	192373761	A	C	3:192377495:C:G	rs9824137	3	192377495	G	C	0.93884	intron_variant	MODIFIER	FGF12	ENSG00000114279	protein_coding	-	1/4	-	-	-	-	-	rs9824137	-	-1	Ensembl	-	-	-	-	-	-	-	-	-	-	-	-	-	-	-
41	previously not reported	FGF12	3:192373761:A:C	3	192373761	A	C	3:192377645:C:T	rs9844140	3	192377645	T	C	0.936473	intron_variant	MODIFIER	FGF12	ENSG00000114279	protein_coding	-	1/4	-	-	-	-	-	rs9844140	-	-1	Ensembl	-	-	-	-	-	-	-	-	-	-	-	-	-	-	-
41	previously not reported	FGF12	3:192373761:A:C	3	192373761	A	C	3:192377849:C:T	rs9828090	3	192377849	C	T	0.954498	intron_variant	MODIFIER	FGF12	ENSG00000114279	protein_coding	-	1/4	-	-	-	-	-	rs9828090	-	-1	Ensembl	-	-	-	-	-	0.5685	0.4781	0.4496	0.6726	0.6093	0.6258	-	-	-	-
41	previously not reported	FGF12	3:192373761:A:C	3	192373761	A	C	3:192377858:A:G	rs9865657	3	192377858	A	G	0.938186	intron_variant	MODIFIER	FGF12	ENSG00000114279	protein_coding	-	1/4	-	-	-	-	-	rs9865657	-	-1	Ensembl	-	-	-	-	-	0.5723	0.4781	0.4496	0.6726	0.6093	0.6452	-	-	-	-
41	previously not reported	FGF12	3:192373761:A:C	3	192373761	A	C	3:192378518:A:G	rs61413473	3	192378518	A	G	0.952157	intron_variant	MODIFIER	FGF12	ENSG00000114279	protein_coding	-	1/4	-	-	-	-	-	rs61413473	-	-1	Ensembl	-	-	-	-	-	0.5687	0.4781	0.451	0.6726	0.6074	0.6278	-	-	-	-
41	previously not reported	FGF12	3:192373761:A:C	3	192373761	A	C	3:192378678:A:G	rs4513395	3	192378678	G	A	0.951412	intron_variant	MODIFIER	FGF12	ENSG00000114279	protein_coding	-	1/4	-	-	-	-	-	rs4513395	-	-1	Ensembl	-	-	-	-	-	0.5685	0.4781	0.451	0.6726	0.6064	0.6278	-	-	-	-
41	previously not reported	FGF12	3:192373761:A:C	3	192373761	A	C	3:192378779:D:I	rs5855445	3	192378779	D	I	0.979836	intron_variant	MODIFIER	FGF12	ENSG00000114279	protein_coding	-	1/4	-	-	-	-	-	rs5855445	-	-1	Ensembl	-	-	-	-	-	0.6098	0.5091	0.4539	0.6726	0.6093	0.6329	-	-	-	-
41	previously not reported	FGF12	3:192373761:A:C	3	192373761	A	C	3:192378851:A:G	rs1503586	3	192378851	G	A	0.945833	intron_variant	MODIFIER	FGF12	ENSG00000114279	protein_coding	-	1/4	-	-	-	-	-	rs1503586	-	-1	Ensembl	-	-	-	-	-	0.5707	0.4803	0.4524	0.6726	0.6083	0.6329	-	-	-	-
42	previously not reported	DLG1	3:196799232:D:I	3	196799232	I	C	3:196799232:D:I	rs143879787	3	196799232	I	C	1	intron_variant	MODIFIER	DLG1	ENSG00000075711	protein_coding	-	19/25	-	-	-	-	-	rs143879787	-	-1	Ensembl	-	-	-	-	-	0.2512	0.0151	0.1988	0.619	0.2893	0.1892	-	-	-	-
42	previously not reported	DLG1	3:196799232:D:I	3	196799232	I	C	3:196803647:C:T	rs12632559	3	196803647	T	C	0.993955	intron_variant	MODIFIER	DLG1	ENSG00000075711	protein_coding	-	18/25	-	-	-	-	-	rs12632559	-	-1	Ensembl	-	-	-	-	-	0.2526	0.0151	0.2003	0.622	0.2893	0.1922	-	-	-	-
42	previously not reported	DLG1	3:196799232:D:I	3	196799232	I	C	3:196867871:A:G	rs3773855	3	196867871	G	A	0.930754	intron_variant	MODIFIER	DLG1	ENSG00000075711	protein_coding	-	8/25	-	-	-	-	-	rs3773855	-	-1	Ensembl	-	-	-	-	-	0.2524	0.0393	0.1931	0.6161	0.2724	0.1871	-	-	-	-
42	previously not reported	DLG1	3:196799232:D:I	3	196799232	I	C	3:196911361:C:T	rs12152266	3	196911361	C	T	0.979074	intron_variant	MODIFIER	DLG1	ENSG00000075711	protein_coding	-	5/25	-	-	-	-	-	rs12152266	-	-1	Ensembl	-	-	-	-	-	0.25	0.0159	0.2003	0.6131	0.2893	0.1871	-	-	-	-
42	previously not reported	DLG1	3:196799232:D:I	3	196799232	I	C	3:196939883:C:T	rs7616531	3	196939883	C	T	0.971247	intron_variant	MODIFIER	DLG1	ENSG00000075711	protein_coding	-	4/25	-	-	-	-	-	rs7616531	-	-1	Ensembl	-	-	-	-	-	0.249	0.0159	0.1974	0.6091	0.2903	0.1871	-	-	-	-
42	previously not reported	DLG1	3:196799232:D:I	3	196799232	I	C	3:196952171:A:C	rs10461050	3	196952171	A	C	0.962591	intron_variant	MODIFIER	DLG1	ENSG00000075711	protein_coding	-	4/25	-	-	-	-	-	rs10461050	-	-1	Ensembl	-	-	-	-	-	0.2522	0.0204	0.2003	0.6161	0.2883	0.1902	-	-	-	-
42	previously not reported	DLG1	3:196799232:D:I	3	196799232	I	C	3:197011680:A:G	rs13072590	3	197011680	G	A	0.962812	intron_variant	MODIFIER	DLG1	ENSG00000075711	protein_coding	-	3/25	-	-	-	-	-	rs13072590	-	-1	Ensembl	-	-	-	-	-	0.2522	0.0159	0.2003	0.6161	0.2913	0.1933	-	-	-	-
43	previously not reported	SRD5A3	4:56123105:A:G	4	56123105	G	A	4:56123105:A:G	rs77422711	4	56123105	G	A	1	intergenic_variant	MODIFIER	-	-	-	-	-	-	-	-	-	-	rs77422711	-	-	-	-	-	-	-	-	0.0038	0	0.0043	0.001	0.0089	0.0061	-	-	-	-
43	previously not reported	SRD5A3	4:56123105:A:G	4	56123105	G	A	4:56136027:G:T	rs13126307	4	56136027	T	G	0.896745	regulatory_region_variant	MODIFIER	-	-	open_chromatin_region	-	-	-	-	-	-	-	rs13126307	-	-	-	-	-	-	-	-	0.0038	0	0.0058	0	0.0089	0.0061	-	-	-	-
43	previously not reported	SRD5A3	4:56123105:A:G	4	56123105	G	A	4:56186000:C:T	rs35463994	4	56186000	C	T	0.84393	intergenic_variant	MODIFIER	-	-	-	-	-	-	-	-	-	-	rs35463994	-	-	-	-	-	-	-	-	0.0036	0	0.0058	0	0.0089	0.0051	-	-	-	-
44	previously not reported	LPHN3	4:62409801:C:G	4	62409801	G	C	4:62409714:A:T	rs28684820	4	62409714	T	A	1	intron_variant	MODIFIER	LPHN3	ENSG00000150471	protein_coding	-	3/24	-	-	-	-	-	rs28684820	-	1	Ensembl	-	-	-	-	-	0.2829	0.1528	0.4424	0.2361	0.3976	0.2761	-	-	-	-
44	previously not reported	LPHN3	4:62409801:C:G	4	62409801	G	C	4:62409801:C:G	rs28540500	4	62409801	G	C	1	intron_variant	MODIFIER	LPHN3	ENSG00000150471	protein_coding	-	3/24	-	-	-	-	-	rs28540500	-	1	Ensembl	-	-	-	-	-	0.2829	0.1528	0.4424	0.2361	0.3976	0.2761	-	-	-	-
44	previously not reported	LPHN3	4:62409801:C:G	4	62409801	G	C	4:62409950:C:G	rs67283284	4	62409950	C	G	0.997298	intron_variant	MODIFIER	LPHN3	ENSG00000150471	protein_coding	-	3/24	-	-	-	-	-	rs67283284	-	1	Ensembl	-	-	-	-	-	0.2835	0.1528	0.4424	0.2361	0.3976	0.2791	-	-	-	-
45	previously not reported	FGF5	4:81202048:G:T	4	81202048	G	T	4:81202048:G:T	rs36034102	4	81202048	G	T	1	intron_variant	MODIFIER	FGF5	ENSG00000138675	protein_coding	-	2/2	-	-	-	-	-	rs36034102	-	1	Ensembl	-	-	-	-	-	0.1945	0.0681	0.2738	0.2579	0.2435	0.1933	-	-	-	27736895
46	previously not reported	PDLIM5	4:95506214:A:G	4	95506214	G	A	4:95495520:A:G	rs10019142	4	95495520	G	A	0.888242	intron_variant	MODIFIER	PDLIM5	ENSG00000163110	protein_coding	-	3/15	-	-	-	-	-	rs10019142	-	1	Ensembl	-	-	-	-	-	0.4964	0.2935	0.5533	0.5	0.4692	0.7546	-	-	-	-
46	previously not reported	PDLIM5	4:95506214:A:G	4	95506214	G	A	4:95500223:C:T	rs3805266	4	95500223	C	T	0.976854	intron_variant	MODIFIER	PDLIM5	ENSG00000163110	protein_coding	-	4/15	-	-	-	-	-	rs3805266	-	1	Ensembl	-	-	-	-	-	0.4681	0.6301	0.4207	0.4921	0.5169	0.2076	-	-	-	-
46	previously not reported	PDLIM5	4:95506214:A:G	4	95506214	G	A	4:95503578:C:T	rs3843444	4	95503578	T	C	0.973419	intron_variant	MODIFIER	PDLIM5	ENSG00000163110	protein_coding	-	4/15	-	-	-	-	-	rs3843444	-	1	Ensembl	-	-	-	-	-	0.4794	0.649	0.4323	0.4921	0.5258	0.2229	-	-	-	-
46	previously not reported	PDLIM5	4:95506214:A:G	4	95506214	G	A	4:95506214:A:G	rs2172448	4	95506214	G	A	1	intron_variant	MODIFIER	PDLIM5	ENSG00000163110	protein_coding	-	5/15	-	-	-	-	-	rs2172448	-	1	Ensembl	-	-	-	-	-	0.4728	0.6339	0.4222	0.4921	0.5209	0.2219	-	-	-	-
46	previously not reported	PDLIM5	4:95506214:A:G	4	95506214	G	A	4:95507176:C:T	rs6532491	4	95507176	C	T	0.940698	intron_variant	MODIFIER	PDLIM5	ENSG00000163110	protein_coding	-	6/15	-	-	-	-	-	rs6532491	-	1	Ensembl	-	-	-	-	-	0.4736	0.6218	0.428	0.4931	0.5209	0.2372	-	-	-	-
46	previously not reported	PDLIM5	4:95506214:A:G	4	95506214	G	A	4:95509763:A:G	rs7662466	4	95509763	A	G	0.935608	intron_variant	MODIFIER	PDLIM5	ENSG00000163110	protein_coding	-	7/15	-	-	-	-	-	rs7662466	-	1	Ensembl	-	-	-	-	-	0.4738	0.6218	0.4294	0.4931	0.5209	0.2372	-	-	-	-
46	previously not reported	PDLIM5	4:95506214:A:G	4	95506214	G	A	4:95510638:A:G	rs4634230	4	95510638	G	A	0.917575	intron_variant	MODIFIER	PDLIM5	ENSG00000163110	protein_coding	-	7/15	-	-	-	-	-	rs4634230	-	1	Ensembl	-	-	-	-	-	0.4615	0.5938	0.4222	0.4931	0.5159	0.2219	-	-	-	-
46	previously not reported	PDLIM5	4:95506214:A:G	4	95506214	G	A	4:95511096:C:T	rs10019505	4	95511096	T	C	0.929126	intron_variant	MODIFIER	PDLIM5	ENSG00000163110	protein_coding	-	7/15	-	-	-	-	-	rs10019505	-	1	Ensembl	-	-	-	-	-	0.4649	0.5938	0.4236	0.4931	0.5189	0.2352	-	-	-	22985493
46	previously not reported	PDLIM5	4:95506214:A:G	4	95506214	G	A	4:95514609:A:C	rs12500426	4	95514609	A	C	0.919763	intron_variant	MODIFIER	PDLIM5	ENSG00000163110	protein_coding	-	7/15	-	-	-	-	-	rs12500426	-	1	Ensembl	-	-	-	-	-	0.478	0.6225	0.4352	0.4931	0.5328	0.2413	-	-	1	20505153,20585100,24701578,22101116,24497837,26025378,27070714,22985493,24740154,21390317,22459122,23593118,24753544,21637779,21367958,21820706,22077888,26773531,20667146,21295399,21468051,21769933,23573233,19767753,25837820,27693979,26162851,23555315,23593537,26611117,20418093,21151957
46	previously not reported	PDLIM5	4:95506214:A:G	4	95506214	G	A	4:95517914:D:I	rs36227776	4	95517914	I	A	0.858129	intron_variant	MODIFIER	PDLIM5	ENSG00000163110	protein_coding	-	7/15	-	-	-	-	-	rs36227776	-	1	Ensembl	-	-	-	-	-	0.4904	0.2731	0.5519	0.5099	0.4742	0.7372	-	-	-	-
46	previously not reported	PDLIM5	4:95506214:A:G	4	95506214	G	A	4:95521358:C:G	rs12648941	4	95521358	C	G	0.847647	intron_variant	MODIFIER	PDLIM5	ENSG00000163110	protein_coding	-	7/15	-	-	-	-	-	rs12648941	-	1	Ensembl	-	-	-	-	-	-	0.3056	0.5576	0.5069	0.4761	0.7393	-	-	-	-
47	previously not reported	MYOZ2	4:120070079:A:T	4	120070079	T	A	4:120062451:A:G	rs62326299	4	120062451	A	G	0.970439	intron_variant	MODIFIER	MYOZ2	ENSG00000172399	protein_coding	-	2/5	-	-	-	-	-	rs62326299	-	1	Ensembl	-	-	-	-	-	0.2356	0.0552	0.3415	0.2282	0.2634	0.3834	-	-	-	-
47	previously not reported	MYOZ2	4:120070079:A:T	4	120070079	T	A	4:120063158:A:G	rs55932281	4	120063158	A	G	0.970439	intron_variant	MODIFIER	MYOZ2	ENSG00000172399	protein_coding	-	2/5	-	-	-	-	-	rs55932281	-	1	Ensembl	-	-	-	-	-	0.2358	0.0567	0.3415	0.2272	0.2634	0.3834	-	-	-	-
47	previously not reported	MYOZ2	4:120070079:A:T	4	120070079	T	A	4:120063715:C:T	rs7694500	4	120063715	C	T	0.960698	intron_variant	MODIFIER	MYOZ2	ENSG00000172399	protein_coding	-	2/5	-	-	-	-	-	rs7694500	-	1	Ensembl	-	-	-	-	-	0.2813	0.2254	0.3516	0.2272	0.2614	0.3834	-	-	-	-
47	previously not reported	MYOZ2	4:120070079:A:T	4	120070079	T	A	4:120063843:A:G	rs7694555	4	120063843	A	G	0.960698	intron_variant	MODIFIER	MYOZ2	ENSG00000172399	protein_coding	-	2/5	-	-	-	-	-	rs7694555	-	1	Ensembl	-	-	-	-	-	0.2816	0.2262	0.3516	0.2272	0.2614	0.3834	-	-	-	-
47	previously not reported	MYOZ2	4:120070079:A:T	4	120070079	T	A	4:120063893:A:T	rs55724227	4	120063893	T	A	0.960698	intron_variant	MODIFIER	MYOZ2	ENSG00000172399	protein_coding	-	2/5	-	-	-	-	-	rs55724227	-	1	Ensembl	-	-	-	-	-	0.2348	0.053	0.3415	0.2272	0.2614	0.3855	-	-	-	-
47	previously not reported	MYOZ2	4:120070079:A:T	4	120070079	T	A	4:120065616:C:T	rs62326301	4	120065616	C	T	0.990124	intron_variant	MODIFIER	MYOZ2	ENSG00000172399	protein_coding	-	2/5	-	-	-	-	-	rs62326301	-	1	Ensembl	-	-	-	-	-	0.2362	0.059	0.3401	0.2262	0.2654	0.3824	-	-	-	-
47	previously not reported	MYOZ2	4:120070079:A:T	4	120070079	T	A	4:120065643:A:T	rs62326319	4	120065643	T	A	0.990124	intron_variant	MODIFIER	MYOZ2	ENSG00000172399	protein_coding	-	2/5	-	-	-	-	-	rs62326319	-	1	Ensembl	-	-	-	-	-	0.2362	0.059	0.3401	0.2262	0.2654	0.3824	-	-	-	-
47	previously not reported	MYOZ2	4:120070079:A:T	4	120070079	T	A	4:120068633:C:T	rs62326320	4	120068633	T	C	1	intron_variant	MODIFIER	MYOZ2	ENSG00000172399	protein_coding	-	2/5	-	-	-	-	-	rs62326320	-	1	Ensembl	-	-	-	-	-	0.2344	0.0492	0.3401	0.2262	0.2674	0.3845	-	-	-	-
47	previously not reported	MYOZ2	4:120070079:A:T	4	120070079	T	A	4:120068920:G:T	rs72910519	4	120068920	T	G	1	intron_variant	MODIFIER	MYOZ2	ENSG00000172399	protein_coding	-	2/5	-	-	-	-	-	rs72910519	-	1	Ensembl	-	-	-	-	-	0.2576	0.1362	0.3415	0.2262	0.2674	0.3845	-	-	-	-
47	previously not reported	MYOZ2	4:120070079:A:T	4	120070079	T	A	4:120069488:G:T	rs57070054	4	120069488	G	T	1	intron_variant	MODIFIER	MYOZ2	ENSG00000172399	protein_coding	-	2/5	-	-	-	-	-	rs57070054	-	1	Ensembl	-	-	-	-	-	0.2576	0.1362	0.3415	0.2262	0.2674	0.3845	-	-	-	-
47	previously not reported	MYOZ2	4:120070079:A:T	4	120070079	T	A	4:120069935:D:I	rs568304494	4	120069935	D	I	0.909465	intron_variant	MODIFIER	MYOZ2	ENSG00000172399	protein_coding	-	2/5	-	-	-	-	-	rs568304494	-	1	Ensembl	-	-	-	-	-	-	-	-	-	-	-	-	-	-	-
47	previously not reported	MYOZ2	4:120070079:A:T	4	120070079	T	A	4:120070079:A:T	rs78277783	4	120070079	T	A	1	intron_variant	MODIFIER	MYOZ2	ENSG00000172399	protein_coding	-	2/5	-	-	-	-	-	rs78277783	-	1	Ensembl	-	-	-	-	-	0.237	0.059	0.3401	0.2262	0.2674	0.3845	-	-	-	-
47	previously not reported	MYOZ2	4:120070079:A:T	4	120070079	T	A	4:120073343:D:I	rs201588948	4	120073343	I	A	0.995045	intron_variant	MODIFIER	MYOZ2	ENSG00000172399	protein_coding	-	3/5	-	-	-	-	-	rs201588948	-	1	Ensembl	-	-	-	-	-	0.234	0.0484	0.3372	0.2232	0.2664	0.3896	-	-	-	-
47	previously not reported	MYOZ2	4:120070079:A:T	4	120070079	T	A	4:120073346:D:I	rs572454234	4	120073346	I	G	0.985236	intron_variant	MODIFIER	MYOZ2	ENSG00000172399	protein_coding	-	3/5	-	-	-	-	-	rs572454234	-	1	Ensembl	-	-	-	-	-	0.2328	0.0469	0.3386	0.2252	0.2644	0.3845	-	-	-	-
47	previously not reported	MYOZ2	4:120070079:A:T	4	120070079	T	A	4:120075712:G:T	rs12642637	4	120075712	G	T	1	intron_variant	MODIFIER	MYOZ2	ENSG00000172399	protein_coding	-	3/5	-	-	-	-	-	rs12642637	-	1	Ensembl	-	-	-	-	-	0.2346	0.0499	0.3401	0.2262	0.2674	0.3845	-	-	-	-
47	previously not reported	MYOZ2	4:120070079:A:T	4	120070079	T	A	4:120077329:C:G	rs12644226	4	120077329	G	C	0.990187	intron_variant	MODIFIER	MYOZ2	ENSG00000172399	protein_coding	-	3/5	-	-	-	-	-	rs12644226	-	1	Ensembl	-	-	-	-	-	0.2584	0.1362	0.3429	0.2282	0.2694	0.3834	-	-	-	-
47	previously not reported	MYOZ2	4:120070079:A:T	4	120070079	T	A	4:120084950:C:G	rs56083532	4	120084950	C	G	1	intron_variant	MODIFIER	MYOZ2	ENSG00000172399	protein_coding	-	4/5	-	-	-	-	-	rs56083532	-	1	Ensembl	-	-	-	-	-	0.2378	0.059	0.3401	0.2282	0.2674	0.3865	-	-	-	-
47	previously not reported	MYOZ2	4:120070079:A:T	4	120070079	T	A	4:120086656:A:C	rs55890361	4	120086656	C	A	0.990117	intron_variant	MODIFIER	MYOZ2	ENSG00000172399	protein_coding	-	5/5	-	-	-	-	-	rs55890361	-	1	Ensembl	-	-	-	-	-	0.2586	0.1362	0.3429	0.2282	0.2694	0.3845	-	-	-	-
47	previously not reported	MYOZ2	4:120070079:A:T	4	120070079	T	A	4:120086847:D:I	rs55928104	4	120086847	D	I	0.995044	intron_variant	MODIFIER	MYOZ2	ENSG00000172399	protein_coding	-	5/5	-	-	-	-	-	rs55928104	-	1	Ensembl	-	-	-	-	-	0.2376	0.0598	0.3401	0.2282	0.2684	0.3834	-	-	-	-
47	previously not reported	MYOZ2	4:120070079:A:T	4	120070079	T	A	4:120090256:D:I	rs538709649	4	120090256	D	I	0.990057	intron_variant	MODIFIER	MYOZ2	ENSG00000172399	protein_coding	-	5/5	-	-	-	-	-	rs538709649	-	1	Ensembl	-	-	-	-	-	0.2336	0.056	0.3401	0.2153	0.2674	0.3824	-	-	-	-
47	previously not reported	MYOZ2	4:120070079:A:T	4	120070079	T	A	4:120094880:C:T	rs113588712	4	120094880	T	C	0.990117	intron_variant	MODIFIER	MYOZ2	ENSG00000172399	protein_coding	-	5/5	-	-	-	-	-	rs113588712	-	1	Ensembl	-	-	-	-	-	0.2584	0.1362	0.3429	0.2282	0.2694	0.3834	-	-	-	-
47	previously not reported	MYOZ2	4:120070079:A:T	4	120070079	T	A	4:120095288:A:G	rs4834761	4	120095288	G	A	0.990117	intron_variant	MODIFIER	MYOZ2	ENSG00000172399	protein_coding	-	5/5	-	-	-	-	-	rs4834761	-	1	Ensembl	-	-	-	-	-	0.2584	0.1362	0.3429	0.2282	0.2694	0.3834	-	-	-	-
47	previously not reported	MYOZ2	4:120070079:A:T	4	120070079	T	A	4:120096381:C:T	rs56034803	4	120096381	C	T	0.990117	intron_variant	MODIFIER	MYOZ2	ENSG00000172399	protein_coding	-	5/5	-	-	-	-	-	rs56034803	-	1	Ensembl	-	-	-	-	-	0.2584	0.1362	0.3429	0.2282	0.2694	0.3834	-	-	-	-
47	previously not reported	MYOZ2	4:120070079:A:T	4	120070079	T	A	4:120097384:D:I	rs34324861	4	120097384	I	C	0.980174	intron_variant	MODIFIER	MYOZ2	ENSG00000172399	protein_coding	-	5/5	-	-	-	-	-	rs34324861	-	1	Ensembl	-	-	-	-	-	0.2596	0.1399	0.3429	0.2282	0.2694	0.3845	-	-	-	-
47	previously not reported	MYOZ2	4:120070079:A:T	4	120070079	T	A	4:120099617:A:T	rs62326341	4	120099617	A	T	0.995044	intron_variant	MODIFIER	MYOZ2	ENSG00000172399	protein_coding	-	5/5	-	-	-	-	-	rs62326341	-	1	Ensembl	-	-	-	-	-	0.2402	0.0726	0.3415	0.2282	0.2684	0.3783	-	-	-	-
47	previously not reported	MYOZ2	4:120070079:A:T	4	120070079	T	A	4:120099793:A:G	rs62326342	4	120099793	G	A	0.995044	intron_variant	MODIFIER	MYOZ2	ENSG00000172399	protein_coding	-	5/5	-	-	-	-	-	rs62326342	-	1	Ensembl	-	-	-	-	-	0.2406	0.0719	0.3401	0.2282	0.2684	0.3824	-	-	-	-
48	previously not reported	SLC12A7	5:1054197:C:T	5	1054197	C	T	5:1035946:A:C	rs11953787	5	1035946	C	A	0.809462	intron_variant	MODIFIER	NKD2	ENSG00000145506	protein_coding	-	8/9	-	-	-	-	-	rs11953787	-	1	Ensembl	-	-	-	-	-	0.3339	0.1044	0.4265	0.3442	0.4583	0.4397	-	-	-	-
48	previously not reported	SLC12A7	5:1054197:C:T	5	1054197	C	T	5:1040158:A:G	rs4975527	5	1040158	G	A	0.857	downstream_gene_variant	MODIFIER	NKD2	ENSG00000145506	protein_coding	-	-	-	-	-	-	-	rs4975527	1100	1	Ensembl	-	-	-	-	-	0.3233	0.0635	0.379	0.3601	0.4573	0.4591	-	-	-	-
48	previously not reported	SLC12A7	5:1054197:C:T	5	1054197	C	T	5:1041447:D:I	rs75329139	5	1041447	I	A	0.931393	downstream_gene_variant	MODIFIER	NKD2	ENSG00000145506	protein_coding	-	-	-	-	-	-	-	rs75329139	2390	1	Ensembl	-	-	-	-	-	0.3478	0.1135	0.428	0.3611	0.4712	0.4673	-	-	-	-
48	previously not reported	SLC12A7	5:1054197:C:T	5	1054197	C	T	5:1044005:D:I	rs141758094	5	1044005	I	G	0.895906	downstream_gene_variant	MODIFIER	NKD2	ENSG00000145506	protein_coding	-	-	-	-	-	-	-	rs141758094	4948	1	Ensembl	-	-	-	-	-	0.3327	0.1014	0.4121	0.3552	0.4513	0.4438	-	-	-	-
48	previously not reported	SLC12A7	5:1054197:C:T	5	1054197	C	T	5:1044848:G:T	rs200104480	5	1044848	G	T	0.888564	intergenic_variant	MODIFIER	-	-	-	-	-	-	-	-	-	-	rs200104480	-	-	-	-	-	-	-	-	0.3321	0.0628	0.4207	0.3621	0.4712	0.4591	-	-	-	-
48	previously not reported	SLC12A7	5:1054197:C:T	5	1054197	C	T	5:1045069:G:T	rs114894897	5	1045069	G	T	0.937199	intergenic_variant	MODIFIER	-	-	-	-	-	-	-	-	-	-	rs114894897	-	-	-	-	-	-	-	-	0.346	0.1104	0.428	0.3621	0.4722	0.4601	-	-	-	-
48	previously not reported	SLC12A7	5:1054197:C:T	5	1054197	C	T	5:1045217:A:G	rs115884040	5	1045217	A	G	0.8852	intergenic_variant	MODIFIER	-	-	-	-	-	-	-	-	-	-	rs115884040	-	-	-	-	-	-	-	-	0.3307	0.0628	0.4164	0.3621	0.4672	0.4591	-	-	-	-
48	previously not reported	SLC12A7	5:1054197:C:T	5	1054197	C	T	5:1046826:D:I	rs74214341	5	1046826	I	T	0.81899	downstream_gene_variant	MODIFIER	SLC12A7	ENSG00000113504	protein_coding	-	-	-	-	-	-	-	rs74214341	3671	-1	Ensembl	-	-	-	-	-	0.3528	0.0658	0.4424	0.3631	0.5139	0.501	-	-	-	-
48	previously not reported	SLC12A7	5:1054197:C:T	5	1054197	C	T	5:1048513:D:I	rs138600794	5	1048513	I	T	0.893294	downstream_gene_variant	MODIFIER	SLC12A7	ENSG00000113504	protein_coding	-	-	-	-	-	-	-	rs138600794	1974	-1	Ensembl	-	-	-	-	-	0.3592	0.1089	0.4553	0.3869	0.4761	0.4806	-	-	-	-
48	previously not reported	SLC12A7	5:1054197:C:T	5	1054197	C	T	5:1048986:C:T	rs62329233	5	1048986	T	C	0.921867	downstream_gene_variant	MODIFIER	SLC12A7	ENSG00000113504	protein_coding	-	-	-	-	-	-	-	rs62329233	1513	-1	Ensembl	-	-	-	-	-	0.353	0.115	0.4265	0.3661	0.4751	0.4836	-	-	-	-
48	previously not reported	SLC12A7	5:1054197:C:T	5	1054197	C	T	5:1053396:C:G	rs2241603	5	1053396	C	G	0.89063	intron_variant	MODIFIER	SLC12A7	ENSG00000113504	protein_coding	-	23/23	-	-	-	-	-	rs2241603	-	-1	Ensembl	-	-	-	-	-	0.3347	0.0635	0.4135	0.374	0.4751	0.4601	-	-	-	-
48	previously not reported	SLC12A7	5:1054197:C:T	5	1054197	C	T	5:1054197:C:T	rs4975572	5	1054197	C	T	1	intron_variant	MODIFIER	SLC12A7	ENSG00000113504	protein_coding	-	22/23	-	-	-	-	-	rs4975572	-	-1	Ensembl	-	-	-	-	-	0.3431	0.1082	0.4121	0.3601	0.4612	0.4724	-	-	-	-
48	previously not reported	SLC12A7	5:1054197:C:T	5	1054197	C	T	5:1057113:C:T	rs2241604	5	1057113	C	T	0.915901	intron_variant	MODIFIER	SLC12A7	ENSG00000113504	protein_coding	-	22/23	-	-	-	-	-	rs2241604	-	-1	Ensembl	-	-	-	-	-	0.3494	0.1233	0.4222	0.369	0.4742	0.455	-	-	-	-
48	previously not reported	SLC12A7	5:1054197:C:T	5	1054197	C	T	5:1057405:A:G	rs2241605	5	1057405	G	A	0.92054	intron_variant	MODIFIER	SLC12A7	ENSG00000113504	protein_coding	-	22/23	-	-	-	-	-	rs2241605	-	-1	Ensembl	-	-	-	-	-	0.3482	0.1218	0.4179	0.3661	0.4751	0.456	-	-	-	-
48	previously not reported	SLC12A7	5:1054197:C:T	5	1054197	C	T	5:1059610:A:G	rs13152999	5	1059610	G	A	0.827945	intron_variant	MODIFIER	SLC12A7	ENSG00000113504	protein_coding	-	21/23	-	-	-	-	-	rs13152999	-	-1	Ensembl	-	-	-	-	-	0.3343	0.1006	0.4006	0.3552	0.4602	0.4519	-	-	-	-
48	previously not reported	SLC12A7	5:1054197:C:T	5	1054197	C	T	5:1060379:A:G	rs35661060	5	1060379	G	A	0.885634	intron_variant	MODIFIER	SLC12A7	ENSG00000113504	protein_coding	-	21/23	-	-	-	-	-	rs35661060	-	-1	Ensembl	-	-	-	-	-	0.3391	0.1203	0.402	0.3512	0.4592	0.454	-	-	-	-
48	previously not reported	SLC12A7	5:1066400:A:G	5	1066400	A	G	5:1066400:A:G	rs182271072	5	1066400	A	G	1	intron_variant	MODIFIER	SLC12A7	ENSG00000113504	protein_coding	-	17/23	-	-	-	-	-	rs182271072	-	-1	Ensembl	-	-	-	-	-	0.003	0.0008	0.0058	0	0.0099	0	-	-	-	-
48	previously not reported	SLC12A7	5:1109592:C:G	5	1109592	C	G	5:1109592:C:G	rs4639275	5	1109592	C	G	1	intron_variant	MODIFIER	SLC12A7	ENSG00000113504	protein_coding	-	1/23	-	-	-	-	-	rs4639275	-	-1	Ensembl	-	-	-	-	-	-	-	-	-	-	-	-	-	-	-
49	previously not reported	SUB1	5:32629419:A:G	5	32629419	A	G	5:32616255:C:T	rs922000	5	32616255	C	T	0.902694	intergenic_variant	MODIFIER	-	-	-	-	-	-	-	-	-	-	rs922000	-	-	-	-	-	-	-	-	0.1677	0.0779	0.1974	0.0655	0.3529	0.183	-	-	-	-
49	previously not reported	SUB1	5:32629419:A:G	5	32629419	A	G	5:32616850:A:G	rs72739271	5	32616850	A	G	0.954519	intergenic_variant	MODIFIER	-	-	-	-	-	-	-	-	-	-	rs72739271	-	-	-	-	-	-	-	-	0.1603	0.0726	0.1873	0.0655	0.335	0.1779	-	-	-	-
49	previously not reported	SUB1	5:32629419:A:G	5	32629419	A	G	5:32617791:A:G	rs67041063	5	32617791	A	G	0.954519	intergenic_variant	MODIFIER	-	-	-	-	-	-	-	-	-	-	rs67041063	-	-	-	-	-	-	-	-	0.1603	0.0726	0.1873	0.0655	0.335	0.1779	-	-	-	-
49	previously not reported	SUB1	5:32629419:A:G	5	32629419	A	G	5:32618177:D:I	rs113316099	5	32618177	D	I	0.935601	intergenic_variant	MODIFIER	-	-	-	-	-	-	-	-	-	-	rs113316099	-	-	-	-	-	-	-	-	0.1603	0.0734	0.1801	0.0675	0.335	0.18	-	-	-	-
49	previously not reported	SUB1	5:32629419:A:G	5	32629419	A	G	5:32624163:A:G	rs62368618	5	32624163	G	A	0.932601	intergenic_variant	MODIFIER	-	-	-	-	-	-	-	-	-	-	rs62368618	-	-	-	-	-	-	-	-	0.1699	0.0893	0.1974	0.0645	0.3529	0.18	-	-	-	-
49	previously not reported	SUB1	5:32629419:A:G	5	32629419	A	G	5:32627541:C:G	rs10941014	5	32627541	G	C	0.995957	intergenic_variant	MODIFIER	-	-	-	-	-	-	-	-	-	-	rs10941014	-	-	-	-	-	-	-	-	0.1645	0.0885	0.1859	0.0645	0.334	0.181	-	-	-	-
49	previously not reported	SUB1	5:32629419:A:G	5	32629419	A	G	5:32627752:A:G	rs10941015	5	32627752	A	G	0.995957	intergenic_variant	MODIFIER	-	-	-	-	-	-	-	-	-	-	rs10941015	-	-	-	-	-	-	-	-	0.1645	0.0885	0.1859	0.0645	0.334	0.181	-	-	-	-
49	previously not reported	SUB1	5:32629419:A:G	5	32629419	A	G	5:32627910:A:G	rs12173152	5	32627910	A	G	0.993276	intergenic_variant	MODIFIER	-	-	-	-	-	-	-	-	-	-	rs12173152	-	-	-	-	-	-	-	-	0.1649	0.09	0.1859	0.0645	0.334	0.181	-	-	-	-
49	previously not reported	SUB1	5:32629419:A:G	5	32629419	A	G	5:32628441:C:T	rs17441762	5	32628441	C	T	0.983843	regulatory_region_variant	MODIFIER	-	-	TF_binding_site	-	-	-	-	-	-	-	rs17441762	-	-	-	-	-	-	-	-	0.1619	0.0825	0.1844	0.0645	0.334	0.1769	-	-	-	-
49	previously not reported	SUB1	5:32629419:A:G	5	32629419	A	G	5:32629204:A:G	rs62368620	5	32629204	G	A	0.985201	regulatory_region_variant	MODIFIER	-	-	TF_binding_site	-	-	-	-	-	-	-	rs62368620	-	-	-	-	-	-	-	-	0.1617	0.0825	0.1844	0.0645	0.334	0.1759	-	-	-	-
49	previously not reported	SUB1	5:32629419:A:G	5	32629419	A	G	5:32629361:G:T	rs17441792	5	32629361	T	G	0.993256	intergenic_variant	MODIFIER	-	-	-	-	-	-	-	-	-	-	rs17441792	-	-	-	-	-	-	-	-	0.1629	0.0862	0.1859	0.0645	0.334	0.1759	-	-	-	-
49	previously not reported	SUB1	5:32629419:A:G	5	32629419	A	G	5:32629419:A:G	rs17441816	5	32629419	A	G	1	intergenic_variant	MODIFIER	-	-	-	-	-	-	-	-	-	-	rs17441816	-	-	-	-	-	-	-	-	0.1639	0.0862	0.1859	0.0645	0.334	0.181	-	-	-	-
49	previously not reported	SUB1	5:32629419:A:G	5	32629419	A	G	5:32631856:C:T	rs62368622	5	32631856	T	C	0.868408	intergenic_variant	MODIFIER	-	-	-	-	-	-	-	-	-	-	rs62368622	-	-	-	-	-	-	-	-	0.1643	0.0893	0.1931	0.0228	0.3658	0.184	-	-	-	-
49	previously not reported	SUB1	5:32629419:A:G	5	32629419	A	G	5:32633019:C:T	rs17441855	5	32633019	C	T	0.891781	intergenic_variant	MODIFIER	-	-	-	-	-	-	-	-	-	-	rs17441855	-	-	-	-	-	-	-	-	0.1571	0.0915	0.1873	0.0208	0.337	0.18	-	-	-	-
49	previously not reported	SUB1	5:32775047:G:T	5	32775047	G	T	5:32775047:G:T	rs1173743	5	32775047	G	T	1	intron_variant	MODIFIER	NPR3	ENSG00000113389	protein_coding	-	4/7	-	-	-	-	-	rs1173743	-	1	Ensembl	-	-	-	-	-	0.6234	0.7655	0.536	0.6349	0.504	0.6043	-	-	-	21464461
49	previously not reported	SUB1	5:32775047:G:T	5	32775047	G	T	5:32781581:D:I	rs34653545	5	32781581	D	I	0.975601	intron_variant	MODIFIER	NPR3	ENSG00000113389	protein_coding	-	5/7	-	-	-	-	-	rs34653545	-	1	Ensembl	-	-	-	-	-	0.6346	0.7731	0.5403	0.6647	0.508	0.6135	-	-	-	-
49	previously not reported	SUB1	5:32775047:G:T	5	32775047	G	T	5:32782152:A:C	rs1173747	5	32782152	C	A	0.987841	intron_variant	MODIFIER	NPR3	ENSG00000113389	protein_coding	-	5/7	-	-	-	-	-	rs1173747	-	1	Ensembl	-	-	-	-	-	0.6336	0.7693	0.5418	0.6647	0.507	0.6135	-	-	-	-
49	previously not reported	SUB1	5:32775047:G:T	5	32775047	G	T	5:32789852:C:T	rs1173756	5	32789852	T	C	0.967403	3_prime_UTR_variant	MODIFIER	NPR3	ENSG00000113389	protein_coding	8/8	-	5370	-	-	-	-	rs1173756	-	1	Ensembl	-	-	-	-	-	0.626	0.7526	0.5418	0.6637	0.508	0.5971	-	-	-	-
49	previously not reported	SUB1	5:32775047:G:T	5	32775047	G	T	5:32800739:D:I	rs35321158	5	32800739	D	I	0.963568	intergenic_variant	MODIFIER	-	-	-	-	-	-	-	-	-	-	rs35321158	-	-	-	-	-	-	-	-	0.6312	0.7753	0.5418	0.6647	0.5109	0.589	-	-	-	-
49	previously not reported	SUB1	5:32775047:G:T	5	32775047	G	T	5:32804528:C:T	rs1173766	5	32804528	T	C	0.825764	intergenic_variant	MODIFIER	-	-	-	-	-	-	-	-	-	-	rs1173766	-	-	-	-	-	-	-	-	0.6012	0.6286	0.5418	0.6657	0.5427	0.6002	-	-	1	21572416,22100073,26345810,23493048,27980618
49	previously not reported	SUB1	5:32775047:G:T	5	32775047	G	T	5:32805031:C:T	rs1173768	5	32805031	T	C	0.808743	intergenic_variant	MODIFIER	-	-	-	-	-	-	-	-	-	-	rs1173768	-	-	-	-	-	-	-	-	0.6392	0.7784	0.5476	0.6627	0.5388	0.5951	-	-	-	-
50	previously not reported	HCN1	5:45864843:A:G	5	45864843	G	A	5:45401817:A:T	rs7446182	5	45401817	A	T	0.855564	intron_variant	MODIFIER	HCN1	ENSG00000164588	protein_coding	-	3/7	-	-	-	-	-	rs7446182	-	-1	Ensembl	-	-	-	-	-	0.5333	0.7421	0.4798	0.4673	0.4235	0.4703	-	-	-	-
50	previously not reported	HCN1	5:45864843:A:G	5	45864843	G	A	5:45403735:C:T	rs4133429	5	45403735	T	C	0.80941	intron_variant	MODIFIER	HCN1	ENSG00000164588	protein_coding	-	3/7	-	-	-	-	-	rs4133429	-	-1	Ensembl	-	-	-	-	-	0.52	0.7057	0.4755	0.4663	0.4155	0.4632	-	-	-	-
50	previously not reported	HCN1	5:45864843:A:G	5	45864843	G	A	5:45409900:C:T	rs13162651	5	45409900	T	C	0.806954	intron_variant	MODIFIER	HCN1	ENSG00000164588	protein_coding	-	3/7	-	-	-	-	-	rs13162651	-	-1	Ensembl	-	-	-	-	-	0.5208	0.7057	0.4755	0.4722	0.4145	0.4622	-	-	-	-
50	previously not reported	HCN1	5:45864843:A:G	5	45864843	G	A	5:45416794:C:T	rs56908114	5	45416794	T	C	0.853212	intron_variant	MODIFIER	HCN1	ENSG00000164588	protein_coding	-	3/7	-	-	-	-	-	rs56908114	-	-1	Ensembl	-	-	-	-	-	0.5357	0.7436	0.4827	0.4712	0.4254	0.4724	-	-	-	-
50	previously not reported	HCN1	5:45864843:A:G	5	45864843	G	A	5:45427137:A:G	rs6892290	5	45427137	A	G	0.812134	intron_variant	MODIFIER	HCN1	ENSG00000164588	protein_coding	-	3/7	-	-	-	-	-	rs6892290	-	-1	Ensembl	-	-	-	-	-	0.5218	0.7118	0.4726	0.4702	0.4155	0.4622	-	-	-	-
50	previously not reported	HCN1	5:45864843:A:G	5	45864843	G	A	5:45427173:C:T	rs6892594	5	45427173	C	T	0.804168	intron_variant	MODIFIER	HCN1	ENSG00000164588	protein_coding	-	3/7	-	-	-	-	-	rs6892594	-	-1	Ensembl	-	-	-	-	-	0.5158	0.6982	0.4669	0.4623	0.4155	0.4622	-	-	-	-
50	previously not reported	HCN1	5:45864843:A:G	5	45864843	G	A	5:45428535:C:T	rs7723380	5	45428535	T	C	0.805545	intron_variant	MODIFIER	HCN1	ENSG00000164588	protein_coding	-	3/7	-	-	-	-	-	rs7723380	-	-1	Ensembl	-	-	-	-	-	0.5194	0.7057	0.4669	0.4702	0.4155	0.4622	-	-	-	-
50	previously not reported	HCN1	5:45864843:A:G	5	45864843	G	A	5:45435019:C:T	rs12520124	5	45435019	T	C	0.810367	intron_variant	MODIFIER	HCN1	ENSG00000164588	protein_coding	-	3/7	-	-	-	-	-	rs12520124	-	-1	Ensembl	-	-	-	-	-	0.5188	0.705	0.4669	0.4683	0.4155	0.4622	-	-	-	-
50	previously not reported	HCN1	5:45864843:A:G	5	45864843	G	A	5:45435986:A:T	rs34666220	5	45435986	T	A	0.812867	intron_variant	MODIFIER	HCN1	ENSG00000164588	protein_coding	-	3/7	-	-	-	-	-	rs34666220	-	-1	Ensembl	-	-	-	-	-	0.5188	0.7088	0.4669	0.4633	0.4155	0.4622	-	-	-	-
50	previously not reported	HCN1	5:45864843:A:G	5	45864843	G	A	5:45439433:A:G	rs6451801	5	45439433	G	A	0.826021	intron_variant	MODIFIER	HCN1	ENSG00000164588	protein_coding	-	3/7	-	-	-	-	-	rs6451801	-	-1	Ensembl	-	-	-	-	-	0.5216	0.7201	0.4697	0.4613	0.4145	0.4622	-	-	-	-
50	previously not reported	HCN1	5:45864843:A:G	5	45864843	G	A	5:45440343:G:T	rs6860200	5	45440343	G	T	0.814722	intron_variant	MODIFIER	HCN1	ENSG00000164588	protein_coding	-	3/7	-	-	-	-	-	rs6860200	-	-1	Ensembl	-	-	-	-	-	0.5182	0.708	0.4654	0.4633	0.4145	0.4622	-	-	-	-
50	previously not reported	HCN1	5:45864843:A:G	5	45864843	G	A	5:45441027:C:G	rs6451802	5	45441027	C	G	0.807775	intron_variant	MODIFIER	HCN1	ENSG00000164588	protein_coding	-	3/7	-	-	-	-	-	rs6451802	-	-1	Ensembl	-	-	-	-	-	0.5156	0.7057	0.464	0.4623	0.4076	0.4611	-	-	-	-
50	previously not reported	HCN1	5:45864843:A:G	5	45864843	G	A	5:45445069:A:G	rs13169726	5	45445069	G	A	0.825265	intron_variant	MODIFIER	HCN1	ENSG00000164588	protein_coding	-	3/7	-	-	-	-	-	rs13169726	-	-1	Ensembl	-	-	-	-	-	0.5222	0.7216	0.4712	0.4613	0.4145	0.4622	-	-	-	-
50	previously not reported	HCN1	5:45864843:A:G	5	45864843	G	A	5:45445293:A:G	rs13169640	5	45445293	A	G	0.814147	intron_variant	MODIFIER	HCN1	ENSG00000164588	protein_coding	-	3/7	-	-	-	-	-	rs13169640	-	-1	Ensembl	-	-	-	-	-	0.518	0.7088	0.4654	0.4613	0.4145	0.4622	-	-	-	-
50	previously not reported	HCN1	5:45864843:A:G	5	45864843	G	A	5:45457077:C:T	rs13354798	5	45457077	T	C	0.85847	intron_variant	MODIFIER	HCN1	ENSG00000164588	protein_coding	-	3/7	-	-	-	-	-	rs13354798	-	-1	Ensembl	-	-	-	-	-	0.5337	0.7428	0.4798	0.4623	0.4245	0.4755	-	-	-	-
50	previously not reported	HCN1	5:45864843:A:G	5	45864843	G	A	5:45465812:A:G	rs2220083	5	45465812	A	G	0.813453	intron_variant	MODIFIER	HCN1	ENSG00000164588	protein_coding	-	2/7	-	-	-	-	-	rs2220083	-	-1	Ensembl	-	-	-	-	-	0.5178	0.7088	0.4654	0.4613	0.4135	0.4622	-	-	-	-
50	previously not reported	HCN1	5:45864843:A:G	5	45864843	G	A	5:45466616:C:G	rs7717787	5	45466616	C	G	0.859239	intron_variant	MODIFIER	HCN1	ENSG00000164588	protein_coding	-	2/7	-	-	-	-	-	rs7717787	-	-1	Ensembl	-	-	-	-	-	0.5309	0.7383	0.4784	0.4573	0.4225	0.4755	-	-	-	-
50	previously not reported	HCN1	5:45864843:A:G	5	45864843	G	A	5:45472753:D:I	rs140354754	5	45472753	D	I	0.830304	intron_variant	MODIFIER	HCN1	ENSG00000164588	protein_coding	-	2/7	-	-	-	-	-	rs140354754	-	-1	Ensembl	-	-	-	-	-	0.5234	0.7368	0.464	0.4603	0.4036	0.4652	-	-	-	-
50	previously not reported	HCN1	5:45864843:A:G	5	45864843	G	A	5:45474814:A:C	rs7706140	5	45474814	A	C	0.858281	intron_variant	MODIFIER	HCN1	ENSG00000164588	protein_coding	-	2/7	-	-	-	-	-	rs7706140	-	-1	Ensembl	-	-	-	-	-	0.5325	0.7443	0.4784	0.4593	0.4235	0.4724	-	-	-	-
50	previously not reported	HCN1	5:45864843:A:G	5	45864843	G	A	5:45478771:A:G	rs7727890	5	45478771	G	A	0.863892	intron_variant	MODIFIER	HCN1	ENSG00000164588	protein_coding	-	2/7	-	-	-	-	-	rs7727890	-	-1	Ensembl	-	-	-	-	-	0.5308	0.7375	0.4784	0.4603	0.4225	0.4724	-	-	-	-
50	previously not reported	HCN1	5:45864843:A:G	5	45864843	G	A	5:45483512:G:T	rs2337412	5	45483512	G	T	0.821075	intron_variant	MODIFIER	HCN1	ENSG00000164588	protein_coding	-	2/7	-	-	-	-	-	rs2337412	-	-1	Ensembl	-	-	-	-	-	0.518	0.7156	0.4712	0.4583	0.4125	0.454	-	-	-	-
50	previously not reported	HCN1	5:45864843:A:G	5	45864843	G	A	5:45492205:A:G	rs6451804	5	45492205	A	G	0.827149	intron_variant	MODIFIER	HCN1	ENSG00000164588	protein_coding	-	2/7	-	-	-	-	-	rs6451804	-	-1	Ensembl	-	-	-	-	-	0.5212	0.7186	0.4712	0.4623	0.4125	0.4622	-	-	-	-
50	previously not reported	HCN1	5:45864843:A:G	5	45864843	G	A	5:45494381:G:T	rs28872833	5	45494381	G	T	0.820799	intron_variant	MODIFIER	HCN1	ENSG00000164588	protein_coding	-	2/7	-	-	-	-	-	rs28872833	-	-1	Ensembl	-	-	-	-	-	0.5184	0.7118	0.4712	0.4593	0.4115	0.4611	-	-	-	-
50	previously not reported	HCN1	5:45864843:A:G	5	45864843	G	A	5:45516995:D:I	rs10654224	5	45516995	D	I	0.829399	intron_variant	MODIFIER	HCN1	ENSG00000164588	protein_coding	-	2/7	-	-	-	-	-	rs10654224	-	-1	Ensembl	-	-	-	-	-	0.5146	0.6967	0.4582	0.4623	0.4155	0.4642	-	-	-	-
50	previously not reported	HCN1	5:45864843:A:G	5	45864843	G	A	5:45534423:C:G	rs6451807	5	45534423	C	G	0.843279	intron_variant	MODIFIER	HCN1	ENSG00000164588	protein_coding	-	2/7	-	-	-	-	-	rs6451807	-	-1	Ensembl	-	-	-	-	-	-	0.711	0.464	0.4623	0.4155	0.4642	-	-	-	-
50	previously not reported	HCN1	5:45864843:A:G	5	45864843	G	A	5:45552765:G:T	rs2625494	5	45552765	G	T	0.887687	intron_variant	MODIFIER	HCN1	ENSG00000164588	protein_coding	-	2/7	-	-	-	-	-	rs2625494	-	-1	Ensembl	-	-	-	-	-	0.5321	0.7383	0.4712	0.4653	0.4254	0.4755	-	-	-	-
50	previously not reported	HCN1	5:45864843:A:G	5	45864843	G	A	5:45553387:C:T	rs1384732	5	45553387	C	T	0.8347	intron_variant	MODIFIER	HCN1	ENSG00000164588	protein_coding	-	2/7	-	-	-	-	-	rs1384732	-	-1	Ensembl	-	-	-	-	-	0.5162	0.7005	0.4582	0.4643	0.4155	0.4652	-	-	-	-
50	previously not reported	HCN1	5:45864843:A:G	5	45864843	G	A	5:45561903:A:G	rs1351720	5	45561903	G	A	0.884269	intron_variant	MODIFIER	HCN1	ENSG00000164588	protein_coding	-	2/7	-	-	-	-	-	rs1351720	-	-1	Ensembl	-	-	-	-	-	0.5316	0.7375	0.4741	0.4623	0.4254	0.4744	-	-	-	-
50	previously not reported	HCN1	5:45864843:A:G	5	45864843	G	A	5:45572099:C:T	rs1483303	5	45572099	C	T	0.834169	intron_variant	MODIFIER	HCN1	ENSG00000164588	protein_coding	-	2/7	-	-	-	-	-	rs1483303	-	-1	Ensembl	-	-	-	-	-	0.5156	0.6974	0.4582	0.4643	0.4165	0.4652	-	-	-	-
50	previously not reported	HCN1	5:45864843:A:G	5	45864843	G	A	5:45573591:D:I	rs34691237	5	45573591	I	T	0.845818	intron_variant	MODIFIER	HCN1	ENSG00000164588	protein_coding	-	2/7	-	-	-	-	-	rs34691237	-	-1	Ensembl	-	-	-	-	-	0.5196	0.7103	0.464	0.4643	0.4155	0.4652	-	-	-	-
50	previously not reported	HCN1	5:45864843:A:G	5	45864843	G	A	5:45585723:C:T	rs2696018	5	45585723	C	T	0.834009	intron_variant	MODIFIER	HCN1	ENSG00000164588	protein_coding	-	2/7	-	-	-	-	-	rs2696018	-	-1	Ensembl	-	-	-	-	-	0.516	0.6989	0.4582	0.4643	0.4165	0.4652	-	-	-	-
50	previously not reported	HCN1	5:45864843:A:G	5	45864843	G	A	5:45586917:C:T	rs2580258	5	45586917	C	T	0.886292	intron_variant	MODIFIER	HCN1	ENSG00000164588	protein_coding	-	2/7	-	-	-	-	-	rs2580258	-	-1	Ensembl	-	-	-	-	-	0.5317	0.7375	0.4697	0.4643	0.4264	0.4755	-	-	-	-
50	previously not reported	HCN1	5:45864843:A:G	5	45864843	G	A	5:45603206:C:T	rs2696013	5	45603206	C	T	0.835341	intron_variant	MODIFIER	HCN1	ENSG00000164588	protein_coding	-	2/7	-	-	-	-	-	rs2696013	-	-1	Ensembl	-	-	-	-	-	0.516	0.6997	0.4582	0.4643	0.4165	0.4642	-	-	-	-
50	previously not reported	HCN1	5:45864843:A:G	5	45864843	G	A	5:45608322:C:T	rs2337483	5	45608322	T	C	0.831331	intron_variant	MODIFIER	HCN1	ENSG00000164588	protein_coding	-	2/7	-	-	-	-	-	rs2337483	-	-1	Ensembl	-	-	-	-	-	0.514	0.6929	0.4582	0.4633	0.4165	0.4642	-	-	-	-
50	previously not reported	HCN1	5:45864843:A:G	5	45864843	G	A	5:45622496:A:C	rs6893773	5	45622496	C	A	0.850794	intron_variant	MODIFIER	HCN1	ENSG00000164588	protein_coding	-	2/7	-	-	-	-	-	rs6893773	-	-1	Ensembl	-	-	-	-	-	0.5202	0.7133	0.464	0.4633	0.4165	0.4642	-	-	-	22783272
50	previously not reported	HCN1	5:45864843:A:G	5	45864843	G	A	5:45634000:G:T	rs6451810	5	45634000	T	G	0.850095	intron_variant	MODIFIER	HCN1	ENSG00000164588	protein_coding	-	2/7	-	-	-	-	-	rs6451810	-	-1	Ensembl	-	-	-	-	-	0.5212	0.7156	0.464	0.4643	0.4175	0.4642	-	-	-	-
50	previously not reported	HCN1	5:45864843:A:G	5	45864843	G	A	5:45638629:A:G	rs2580260	5	45638629	G	A	0.840184	intron_variant	MODIFIER	HCN1	ENSG00000164588	protein_coding	-	2/7	-	-	-	-	-	rs2580260	-	-1	Ensembl	-	-	-	-	-	0.5166	0.7027	0.4582	0.4633	0.4165	0.4642	-	-	-	-
50	previously not reported	HCN1	5:45864843:A:G	5	45864843	G	A	5:45653912:C:T	rs2589161	5	45653912	T	C	0.837745	intron_variant	MODIFIER	HCN1	ENSG00000164588	protein_coding	-	1/7	-	-	-	-	-	rs2589161	-	-1	Ensembl	-	-	-	-	-	0.5218	0.7027	0.4625	0.4633	0.4185	0.4857	-	-	-	-
50	previously not reported	HCN1	5:45864843:A:G	5	45864843	G	A	5:45655070:C:T	rs1405918	5	45655070	T	C	0.838451	intron_variant	MODIFIER	HCN1	ENSG00000164588	protein_coding	-	1/7	-	-	-	-	-	rs1405918	-	-1	Ensembl	-	-	-	-	-	0.522	0.7035	0.4625	0.4633	0.4185	0.4857	-	-	-	-
50	previously not reported	HCN1	5:45864843:A:G	5	45864843	G	A	5:45655893:A:G	rs2589162	5	45655893	A	G	0.850675	intron_variant	MODIFIER	HCN1	ENSG00000164588	protein_coding	-	1/7	-	-	-	-	-	rs2589162	-	-1	Ensembl	-	-	-	-	-	0.526	0.7156	0.4683	0.4633	0.4185	0.4857	-	-	-	-
50	previously not reported	HCN1	5:45864843:A:G	5	45864843	G	A	5:45656923:A:C	rs1527831	5	45656923	C	A	0.858419	intron_variant	MODIFIER	HCN1	ENSG00000164588	protein_coding	-	1/7	-	-	-	-	-	rs1527831	-	-1	Ensembl	-	-	-	-	-	0.5226	0.7156	0.4683	0.4633	0.4185	0.4683	-	-	-	-
50	previously not reported	HCN1	5:45864843:A:G	5	45864843	G	A	5:45658794:C:G	rs4502839	5	45658794	G	C	0.846345	intron_variant	MODIFIER	HCN1	ENSG00000164588	protein_coding	-	1/7	-	-	-	-	-	rs4502839	-	-1	Ensembl	-	-	-	-	-	0.5186	0.7035	0.4625	0.4633	0.4185	0.4683	-	-	-	-
50	previously not reported	HCN1	5:45864843:A:G	5	45864843	G	A	5:45690187:A:G	rs35381866	5	45690187	A	G	0.836726	intron_variant	MODIFIER	HCN1	ENSG00000164588	protein_coding	-	1/7	-	-	-	-	-	rs35381866	-	-1	Ensembl	-	-	-	-	-	0.5194	0.677	0.4712	0.4653	0.4264	0.4918	-	-	-	-
50	previously not reported	HCN1	5:45864843:A:G	5	45864843	G	A	5:45702028:A:T	rs10036065	5	45702028	A	T	0.80605	intergenic_variant	MODIFIER	-	-	-	-	-	-	-	-	-	-	rs10036065	-	-	-	-	-	-	-	-	0.5054	0.6551	0.4625	0.4653	0.4165	0.4663	-	-	-	-
50	previously not reported	HCN1	5:45864843:A:G	5	45864843	G	A	5:45710061:G:T	rs10473392	5	45710061	G	T	0.805275	intergenic_variant	MODIFIER	-	-	-	-	-	-	-	-	-	-	rs10473392	-	-	-	-	-	-	-	-	0.5052	0.6558	0.4625	0.4653	0.4165	0.4642	-	-	-	-
50	previously not reported	HCN1	5:45864843:A:G	5	45864843	G	A	5:45712185:D:I	rs11310587	5	45712185	I	T	0.804393	intergenic_variant	MODIFIER	-	-	-	-	-	-	-	-	-	-	rs11310587	-	-	-	-	-	-	-	-	0.5054	0.6551	0.464	0.4653	0.4175	0.4642	-	-	-	-
50	previously not reported	HCN1	5:45864843:A:G	5	45864843	G	A	5:45722124:G:T	rs2337952	5	45722124	T	G	0.806154	intergenic_variant	MODIFIER	-	-	-	-	-	-	-	-	-	-	rs2337952	-	-	-	-	-	-	-	-	0.5046	0.6536	0.464	0.4653	0.4155	0.4642	-	-	-	-
50	previously not reported	HCN1	5:45864843:A:G	5	45864843	G	A	5:45722994:A:C	rs6892627	5	45722994	A	C	0.824126	intergenic_variant	MODIFIER	-	-	-	-	-	-	-	-	-	-	rs6892627	-	-	-	-	-	-	-	-	0.5441	0.798	0.4712	0.4663	0.4155	0.4652	-	-	-	-
50	previously not reported	HCN1	5:45864843:A:G	5	45864843	G	A	5:45725597:C:T	rs7718785	5	45725597	C	T	0.809357	intergenic_variant	MODIFIER	-	-	-	-	-	-	-	-	-	-	rs7718785	-	-	-	-	-	-	-	-	0.5052	0.6558	0.464	0.4663	0.4135	0.4652	-	-	-	-
50	previously not reported	HCN1	5:45864843:A:G	5	45864843	G	A	5:45727866:C:T	rs12110137	5	45727866	T	C	0.847148	intergenic_variant	MODIFIER	-	-	-	-	-	-	-	-	-	-	rs12110137	-	-	-	-	-	-	-	-	0.518	0.6785	0.4755	0.4663	0.4264	0.4785	-	-	-	-
50	previously not reported	HCN1	5:45864843:A:G	5	45864843	G	A	5:45735083:C:T	rs6451814	5	45735083	C	T	0.809924	intergenic_variant	MODIFIER	-	-	-	-	-	-	-	-	-	-	rs6451814	-	-	-	-	-	-	-	-	0.5038	0.6543	0.4582	0.4673	0.4135	0.4632	-	-	-	-
50	previously not reported	HCN1	5:45864843:A:G	5	45864843	G	A	5:45742624:G:T	rs7706116	5	45742624	G	T	0.829752	intergenic_variant	MODIFIER	-	-	-	-	-	-	-	-	-	-	rs7706116	-	-	-	-	-	-	-	-	0.5102	0.6664	0.464	0.4732	0.4125	0.4703	-	-	-	-
50	previously not reported	HCN1	5:45864843:A:G	5	45864843	G	A	5:45743991:A:G	rs201166606	5	45743991	A	G	0.859124	intergenic_variant	MODIFIER	-	-	-	-	-	-	-	-	-	-	rs201166606	-	-	-	-	-	-	-	-	0.5212	0.6891	0.4726	0.4792	0.4225	0.4734	-	-	-	-
50	previously not reported	HCN1	5:45864843:A:G	5	45864843	G	A	5:45747729:A:G	rs10059168	5	45747729	G	A	0.849623	intergenic_variant	MODIFIER	-	-	-	-	-	-	-	-	-	-	rs10059168	-	-	-	-	-	-	-	-	0.5156	0.6891	0.4697	0.4563	0.4205	0.4724	-	-	-	-
50	previously not reported	HCN1	5:45864843:A:G	5	45864843	G	A	5:45747731:G:T	rs10059169	5	45747731	G	T	0.849623	intergenic_variant	MODIFIER	-	-	-	-	-	-	-	-	-	-	rs10059169	-	-	-	-	-	-	-	-	0.5156	0.6891	0.4697	0.4563	0.4205	0.4724	-	-	-	-
50	previously not reported	HCN1	5:45864843:A:G	5	45864843	G	A	5:45747938:A:C	rs4629609	5	45747938	A	C	0.865106	intergenic_variant	MODIFIER	-	-	-	-	-	-	-	-	-	-	rs4629609	-	-	-	-	-	-	-	-	0.5226	0.6914	0.4726	0.4792	0.4225	0.4775	-	-	-	-
50	previously not reported	HCN1	5:45864843:A:G	5	45864843	G	A	5:45748871:D:I	rs10054424	5	45748871	D	I	0.822062	intergenic_variant	MODIFIER	-	-	-	-	-	-	-	-	-	-	rs10054424	-	-	-	-	-	-	-	-	0.4549	0.6657	0.3948	0.4752	0.2992	0.3517	-	-	-	-
50	previously not reported	HCN1	5:45864843:A:G	5	45864843	G	A	5:45750394:A:G	rs4257782	5	45750394	A	G	0.870614	intergenic_variant	MODIFIER	-	-	-	-	-	-	-	-	-	-	rs4257782	-	-	-	-	-	-	-	-	0.5214	0.6899	0.4712	0.4732	0.4225	0.4806	-	-	-	-
50	previously not reported	HCN1	5:45864843:A:G	5	45864843	G	A	5:45751536:C:G	rs10044479	5	45751536	G	C	0.80608	intergenic_variant	MODIFIER	-	-	-	-	-	-	-	-	-	-	rs10044479	-	-	-	-	-	-	-	-	0.5036	0.6445	0.4568	0.4712	0.4125	0.4734	-	-	-	-
50	previously not reported	HCN1	5:45864843:A:G	5	45864843	G	A	5:45752862:C:T	rs4455566	5	45752862	T	C	0.825666	intergenic_variant	MODIFIER	-	-	-	-	-	-	-	-	-	-	rs4455566	-	-	-	-	-	-	-	-	0.5114	0.6664	0.4654	0.4792	0.4125	0.4693	-	-	-	-
50	previously not reported	HCN1	5:45864843:A:G	5	45864843	G	A	5:45759165:G:T	rs12654213	5	45759165	T	G	0.869774	intergenic_variant	MODIFIER	-	-	-	-	-	-	-	-	-	-	rs12654213	-	-	-	-	-	-	-	-	-	-	-	-	-	-	-	-	-	-
50	previously not reported	HCN1	5:45864843:A:G	5	45864843	G	A	5:45759876:A:G	rs9687260	5	45759876	A	G	0.827942	intergenic_variant	MODIFIER	-	-	-	-	-	-	-	-	-	-	rs9687260	-	-	-	-	-	-	-	-	0.5126	0.6672	0.4654	0.4792	0.4125	0.4744	-	-	-	-
50	previously not reported	HCN1	5:45864843:A:G	5	45864843	G	A	5:45770252:A:G	rs7447717	5	45770252	A	G	0.810757	intergenic_variant	MODIFIER	-	-	-	-	-	-	-	-	-	-	rs7447717	-	-	-	-	-	-	-	-	0.4932	0.3464	0.5432	0.5218	0.5875	0.5297	-	-	-	-
50	previously not reported	HCN1	5:45864843:A:G	5	45864843	G	A	5:45789024:C:T	rs4455564	5	45789024	C	T	0.875101	intergenic_variant	MODIFIER	-	-	-	-	-	-	-	-	-	-	rs4455564	-	-	-	-	-	-	-	-	0.5002	0.3351	0.6066	0.5179	0.5974	0.5297	-	-	-	-
50	previously not reported	HCN1	5:45864843:A:G	5	45864843	G	A	5:45789966:A:G	rs4401580	5	45789966	G	A	0.87648	intergenic_variant	MODIFIER	-	-	-	-	-	-	-	-	-	-	rs4401580	-	-	-	-	-	-	-	-	0.5002	0.3351	0.6066	0.5179	0.5974	0.5297	-	-	-	-
50	previously not reported	HCN1	5:45864843:A:G	5	45864843	G	A	5:45802079:C:T	rs4276421	5	45802079	C	T	0.920275	intergenic_variant	MODIFIER	-	-	-	-	-	-	-	-	-	-	rs4276421	-	-	-	-	-	-	-	-	0.4888	0.3116	0.598	0.5179	0.5855	0.5215	-	-	-	-
50	previously not reported	HCN1	5:45864843:A:G	5	45864843	G	A	5:45803151:A:G	rs10069793	5	45803151	G	A	0.917116	intergenic_variant	MODIFIER	-	-	-	-	-	-	-	-	-	-	rs10069793	-	-	-	-	-	-	-	-	0.4954	0.3109	0.6052	0.5278	0.5964	0.5297	-	-	-	-
50	previously not reported	HCN1	5:45864843:A:G	5	45864843	G	A	5:45804847:A:T	rs4866979	5	45804847	T	A	0.938483	intergenic_variant	MODIFIER	-	-	-	-	-	-	-	-	-	-	rs4866979	-	-	-	-	-	-	-	-	0.4852	0.2791	0.6037	0.5179	0.5954	0.5327	-	-	-	-
50	previously not reported	HCN1	5:45864843:A:G	5	45864843	G	A	5:45808054:C:T	rs10941706	5	45808054	C	T	0.990625	intergenic_variant	MODIFIER	-	-	-	-	-	-	-	-	-	-	rs10941706	-	-	-	-	-	-	-	-	0.4748	0.2504	0.598	0.5278	0.5865	0.5215	-	-	-	-
50	previously not reported	HCN1	5:45864843:A:G	5	45864843	G	A	5:45810835:C:T	rs11748089	5	45810835	C	T	0.990621	intergenic_variant	MODIFIER	-	-	-	-	-	-	-	-	-	-	rs11748089	-	-	-	-	-	-	-	-	0.4752	0.2511	0.598	0.5298	0.5855	0.5215	-	-	-	-
50	previously not reported	HCN1	5:45864843:A:G	5	45864843	G	A	5:45813317:C:T	rs10037766	5	45813317	T	C	0.993503	intergenic_variant	MODIFIER	-	-	-	-	-	-	-	-	-	-	rs10037766	-	-	-	-	-	-	-	-	0.4748	0.2504	0.598	0.5278	0.5865	0.5215	-	-	-	-
50	previously not reported	HCN1	5:45864843:A:G	5	45864843	G	A	5:45815536:G:T	rs10755272	5	45815536	G	T	0.989897	intergenic_variant	MODIFIER	-	-	-	-	-	-	-	-	-	-	rs10755272	-	-	-	-	-	-	-	-	0.4758	0.2542	0.598	0.5278	0.5865	0.5215	-	-	-	-
50	previously not reported	HCN1	5:45864843:A:G	5	45864843	G	A	5:45816856:A:G	rs4866982	5	45816856	G	A	0.988462	intergenic_variant	MODIFIER	-	-	-	-	-	-	-	-	-	-	rs4866982	-	-	-	-	-	-	-	-	0.4762	0.2542	0.5994	0.5278	0.5865	0.5225	-	-	-	-
50	previously not reported	HCN1	5:45864843:A:G	5	45864843	G	A	5:45835259:A:G	rs144223816	5	45835259	G	A	0.906139	intergenic_variant	MODIFIER	-	-	-	-	-	-	-	-	-	-	rs144223816	-	-	-	-	-	-	-	-	0.4569	0.2557	0.5576	0.5268	0.5457	0.4939	-	-	1	26198764
50	previously not reported	HCN1	5:45864843:A:G	5	45864843	G	A	5:45837571:A:T	rs10805699	5	45837571	T	A	0.947444	intergenic_variant	MODIFIER	-	-	-	-	-	-	-	-	-	-	rs10805699	-	-	-	-	-	-	-	-	0.4876	0.2784	0.6066	0.5268	0.5974	0.5327	-	-	-	-
50	previously not reported	HCN1	5:45864843:A:G	5	45864843	G	A	5:45840713:D:I	rs5867709	5	45840713	D	I	0.948858	intergenic_variant	MODIFIER	-	-	-	-	-	-	-	-	-	-	rs5867709	-	-	-	-	-	-	-	-	0.4876	0.2776	0.6052	0.5278	0.5974	0.5337	-	-	-	-
50	previously not reported	HCN1	5:45864843:A:G	5	45864843	G	A	5:45842160:C:T	rs6898824	5	45842160	C	T	0.994226	intergenic_variant	MODIFIER	-	-	-	-	-	-	-	-	-	-	rs6898824	-	-	-	-	-	-	-	-	0.4746	0.2496	0.5965	0.5278	0.5865	0.5225	-	-	-	-
50	previously not reported	HCN1	5:45864843:A:G	5	45864843	G	A	5:45843255:A:T	rs6878425	5	45843255	A	T	0.994229	intergenic_variant	MODIFIER	-	-	-	-	-	-	-	-	-	-	rs6878425	-	-	-	-	-	-	-	-	-	-	-	-	-	-	-	-	-	-
50	previously not reported	HCN1	5:45864843:A:G	5	45864843	G	A	5:45844263:D:I	rs34054119	5	45844263	D	I	0.950888	intergenic_variant	MODIFIER	-	-	-	-	-	-	-	-	-	-	rs34054119	-	-	-	-	-	-	-	-	0.513	0.7224	0.3963	0.4722	0.4036	0.4673	-	-	-	-
50	previously not reported	HCN1	5:45864843:A:G	5	45864843	G	A	5:45850236:C:T	rs6895453	5	45850236	T	C	0.800407	intergenic_variant	MODIFIER	-	-	-	-	-	-	-	-	-	-	rs6895453	-	-	-	-	-	-	-	-	0.4688	0.7481	0.3329	0.4722	0.3002	0.3579	-	-	-	-
50	previously not reported	HCN1	5:45864843:A:G	5	45864843	G	A	5:45854627:C:T	rs13175559	5	45854627	T	C	0.996397	intergenic_variant	MODIFIER	-	-	-	-	-	-	-	-	-	-	rs13175559	-	-	-	-	-	-	-	-	0.526	0.7511	0.4035	0.4722	0.4135	0.4796	-	-	-	-
50	previously not reported	HCN1	5:45864843:A:G	5	45864843	G	A	5:45857129:A:C	rs4541666	5	45857129	C	A	0.996397	intergenic_variant	MODIFIER	-	-	-	-	-	-	-	-	-	-	rs4541666	-	-	-	-	-	-	-	-	-	0.7511	0.4035	0.4722	0.4135	0.4796	-	-	-	-
50	previously not reported	HCN1	5:45864843:A:G	5	45864843	G	A	5:45859375:G:T	rs4331911	5	45859375	T	G	0.997834	intergenic_variant	MODIFIER	-	-	-	-	-	-	-	-	-	-	rs4331911	-	-	-	-	-	-	-	-	-	-	-	-	-	-	-	-	-	-
50	previously not reported	HCN1	5:45864843:A:G	5	45864843	G	A	5:45860936:C:T	rs13340341	5	45860936	C	T	0.994224	intergenic_variant	MODIFIER	-	-	-	-	-	-	-	-	-	-	rs13340341	-	-	-	-	-	-	-	-	-	-	-	-	-	-	-	-	-	-
50	previously not reported	HCN1	5:45864843:A:G	5	45864843	G	A	5:45863699:A:C	rs28657933	5	45863699	C	A	1	intergenic_variant	MODIFIER	-	-	-	-	-	-	-	-	-	-	rs28657933	-	-	-	-	-	-	-	-	0.525	0.7496	0.4035	0.4722	0.4105	0.4796	-	-	-	-
50	previously not reported	HCN1	5:45864843:A:G	5	45864843	G	A	5:45864843:A:G	rs10039283	5	45864843	G	A	1	intergenic_variant	MODIFIER	-	-	-	-	-	-	-	-	-	-	rs10039283	-	-	-	-	-	-	-	-	0.525	0.7496	0.4035	0.4722	0.4105	0.4796	-	-	-	-
50	previously not reported	HCN1	5:45864843:A:G	5	45864843	G	A	5:45864890:G:T	rs10061699	5	45864890	G	T	0.807364	intergenic_variant	MODIFIER	-	-	-	-	-	-	-	-	-	-	rs10061699	-	-	-	-	-	-	-	-	0.4684	0.7481	0.3343	0.4712	0.2972	0.3589	-	-	-	-
50	previously not reported	HCN1	5:45864843:A:G	5	45864843	G	A	5:45865343:C:T	rs4282323	5	45865343	T	C	0.801185	intergenic_variant	MODIFIER	-	-	-	-	-	-	-	-	-	-	rs4282323	-	-	-	-	-	-	-	-	0.47	0.7481	0.3343	0.4792	0.2972	0.3589	-	-	-	-
50	previously not reported	HCN1	5:45864843:A:G	5	45864843	G	A	5:45865432:C:T	rs4282324	5	45865432	T	C	1	intergenic_variant	MODIFIER	-	-	-	-	-	-	-	-	-	-	rs4282324	-	-	-	-	-	-	-	-	0.525	0.7496	0.4035	0.4722	0.4105	0.4796	-	-	-	-
50	previously not reported	HCN1	5:45864843:A:G	5	45864843	G	A	5:45866143:A:T	rs4283798	5	45866143	T	A	0.806661	intergenic_variant	MODIFIER	-	-	-	-	-	-	-	-	-	-	rs4283798	-	-	-	-	-	-	-	-	0.4687	0.7489	0.3343	0.4712	0.2972	0.3589	-	-	-	-
50	previously not reported	HCN1	5:45864843:A:G	5	45864843	G	A	5:45877674:G:T	rs6895191	5	45877674	T	G	0.997834	intergenic_variant	MODIFIER	-	-	-	-	-	-	-	-	-	-	rs6895191	-	-	-	-	-	-	-	-	0.5252	0.7489	0.4049	0.4722	0.4115	0.4796	-	-	-	27896979
50	previously not reported	HCN1	5:45864843:A:G	5	45864843	G	A	5:45878308:C:T	rs12109652	5	45878308	C	T	0.99568	intergenic_variant	MODIFIER	-	-	-	-	-	-	-	-	-	-	rs12109652	-	-	-	-	-	-	-	-	0.5238	0.7489	0.402	0.4722	0.4076	0.4785	-	-	-	-
50	previously not reported	HCN1	5:45864843:A:G	5	45864843	G	A	5:45879598:C:T	rs6451827	5	45879598	T	C	0.996392	intergenic_variant	MODIFIER	-	-	-	-	-	-	-	-	-	-	rs6451827	-	-	-	-	-	-	-	-	0.5252	0.7489	0.402	0.4752	0.4105	0.4796	-	-	-	-
50	previously not reported	HCN1	5:45864843:A:G	5	45864843	G	A	5:45882593:D:I	rs9763350	5	45882593	D	I	0.948914	intergenic_variant	MODIFIER	-	-	-	-	-	-	-	-	-	-	rs9763350	-	-	-	-	-	-	-	-	-	0.0408	0.0043	0	0	0	-	-	-	-
50	previously not reported	HCN1	5:45864843:A:G	5	45864843	G	A	5:45882607:C:T	rs10473395	5	45882607	T	C	0.927912	intergenic_variant	MODIFIER	-	-	-	-	-	-	-	-	-	-	rs10473395	-	-	-	-	-	-	-	-	0.5058	0.7163	0.3862	0.4593	0.3996	0.4632	-	-	-	-
50	previously not reported	HCN1	5:45864843:A:G	5	45864843	G	A	5:45882608:A:G	rs10473396	5	45882608	G	A	0.927304	intergenic_variant	MODIFIER	-	-	-	-	-	-	-	-	-	-	rs10473396	-	-	-	-	-	-	-	-	0.5056	0.7163	0.3862	0.4593	0.3986	0.4632	-	-	-	-
50	previously not reported	HCN1	5:45864843:A:G	5	45864843	G	A	5:45882769:A:T	rs7702922	5	45882769	A	T	0.948888	intergenic_variant	MODIFIER	-	-	-	-	-	-	-	-	-	-	rs7702922	-	-	-	-	-	-	-	-	0.5124	0.7209	0.3948	0.4722	0.4026	0.4683	-	-	-	-
50	previously not reported	HCN1	5:45864843:A:G	5	45864843	G	A	5:45884649:A:G	rs140725884	5	45884649	A	G	0.937243	intergenic_variant	MODIFIER	-	-	-	-	-	-	-	-	-	-	rs140725884	-	-	-	-	-	-	-	-	0.5106	0.7141	0.3948	0.4712	0.4036	0.4683	-	-	-	-
50	previously not reported	HCN1	5:45864843:A:G	5	45864843	G	A	5:45893362:C:T	rs6451829	5	45893362	C	T	0.949616	intron_variant,non_coding_transcript_variant	MODIFIER	CTD-2013M15.1	ENSG00000250122	lincRNA	-	1/1	-	-	-	-	-	rs6451829	-	1	Ensembl	-	-	-	-	-	-	-	-	-	-	-	-	-	-	-
50	previously not reported	HCN1	5:45864843:A:G	5	45864843	G	A	5:45893456:A:G	rs6451830	5	45893456	A	G	0.992783	intron_variant,non_coding_transcript_variant	MODIFIER	CTD-2013M15.1	ENSG00000250122	lincRNA	-	1/1	-	-	-	-	-	rs6451830	-	1	Ensembl	-	-	-	-	-	0.525	0.7489	0.402	0.4722	0.4125	0.4796	-	-	-	-
50	previously not reported	HCN1	5:45864843:A:G	5	45864843	G	A	5:45895885:A:G	rs7716296	5	45895885	G	A	0.948888	intron_variant,non_coding_transcript_variant	MODIFIER	CTD-2013M15.1	ENSG00000250122	lincRNA	-	1/1	-	-	-	-	-	rs7716296	-	1	Ensembl	-	-	-	-	-	0.5124	0.7209	0.3948	0.4722	0.4026	0.4683	-	-	-	-
50	previously not reported	HCN1	5:45864843:A:G	5	45864843	G	A	5:45897251:A:G	rs6882139	5	45897251	A	G	0.949544	downstream_gene_variant	MODIFIER	CTD-2013M15.1	ENSG00000250122	lincRNA	-	-	-	-	-	-	-	rs6882139	1179	1	Ensembl	-	-	-	-	-	0.5126	0.7216	0.3948	0.4722	0.4026	0.4683	-	-	-	-
50	previously not reported	HCN1	5:45864843:A:G	5	45864843	G	A	5:45900317:A:G	rs34462057	5	45900317	G	A	0.989915	downstream_gene_variant	MODIFIER	CTD-2013M15.1	ENSG00000250122	lincRNA	-	-	-	-	-	-	-	rs34462057	4245	1	Ensembl	-	-	-	-	-	0.525	0.7489	0.4049	0.4722	0.4105	0.4796	-	-	-	-
50	previously not reported	HCN1	5:45864843:A:G	5	45864843	G	A	5:45904962:C:T	rs35163964	5	45904962	T	C	0.943504	intergenic_variant	MODIFIER	-	-	-	-	-	-	-	-	-	-	rs35163964	-	-	-	-	-	-	-	-	0.5104	0.7141	0.3948	0.4712	0.4026	0.4683	-	-	-	-
50	previously not reported	HCN1	5:45864843:A:G	5	45864843	G	A	5:45905997:A:C	rs6862657	5	45905997	C	A	0.931274	intergenic_variant	MODIFIER	-	-	-	-	-	-	-	-	-	-	rs6862657	-	-	-	-	-	-	-	-	0.5084	0.7163	0.3934	0.4663	0.3996	0.4642	-	-	-	-
50	previously not reported	HCN1	5:45864843:A:G	5	45864843	G	A	5:45915475:A:T	rs7444405	5	45915475	T	A	0.93801	intergenic_variant	MODIFIER	-	-	-	-	-	-	-	-	-	-	rs7444405	-	-	-	-	-	-	-	-	0.5146	0.7224	0.3948	0.4712	0.4076	0.4734	-	-	-	-
50	previously not reported	HCN1	5:45864843:A:G	5	45864843	G	A	5:45917420:C:T	rs6451831	5	45917420	T	C	0.983499	intergenic_variant	MODIFIER	-	-	-	-	-	-	-	-	-	-	rs6451831	-	-	-	-	-	-	-	-	-	-	-	-	-	-	-	-	-	-
50	previously not reported	HCN1	5:45864843:A:G	5	45864843	G	A	5:45920417:C:T	rs7445572	5	45920417	C	T	0.989197	intergenic_variant	MODIFIER	-	-	-	-	-	-	-	-	-	-	rs7445572	-	-	-	-	-	-	-	-	0.5236	0.7489	0.3991	0.4702	0.4125	0.4765	-	-	-	-
50	previously not reported	HCN1	5:45864843:A:G	5	45864843	G	A	5:45923626:A:C	rs7704683	5	45923626	A	C	0.940747	intergenic_variant	MODIFIER	-	-	-	-	-	-	-	-	-	-	rs7704683	-	-	-	-	-	-	-	-	-	0.7231	0.3948	0.4722	0.4056	0.4734	-	-	-	-
50	previously not reported	HCN1	5:45864843:A:G	5	45864843	G	A	5:45923786:A:T	rs7725171	5	45923786	T	A	0.984205	intergenic_variant	MODIFIER	-	-	-	-	-	-	-	-	-	-	rs7725171	-	-	-	-	-	-	-	-	0.5278	0.7504	0.402	0.4712	0.4175	0.4877	-	-	-	-
50	previously not reported	HCN1	5:45864843:A:G	5	45864843	G	A	5:45926441:A:G	rs4274988	5	45926441	A	G	0.93801	intergenic_variant	MODIFIER	-	-	-	-	-	-	-	-	-	-	rs4274988	-	-	-	-	-	-	-	-	0.5146	0.7231	0.3963	0.4712	0.4085	0.4703	-	-	-	-
50	previously not reported	HCN1	5:45864843:A:G	5	45864843	G	A	5:45927293:A:G	rs7725537	5	45927293	A	G	0.938723	intergenic_variant	MODIFIER	-	-	-	-	-	-	-	-	-	-	rs7725537	-	-	-	-	-	-	-	-	0.5144	0.7231	0.3948	0.4712	0.4076	0.4714	-	-	-	-
50	previously not reported	HCN1	5:45864843:A:G	5	45864843	G	A	5:45927310:A:G	rs6451834	5	45927310	A	G	0.860902	intergenic_variant	MODIFIER	-	-	-	-	-	-	-	-	-	-	rs6451834	-	-	-	-	-	-	-	-	0.4914	0.646	0.389	0.4623	0.4076	0.4714	-	-	-	-
50	previously not reported	HCN1	5:45864843:A:G	5	45864843	G	A	5:45927555:A:G	rs35730142	5	45927555	A	G	0.940129	intergenic_variant	MODIFIER	-	-	-	-	-	-	-	-	-	-	rs35730142	-	-	-	-	-	-	-	-	0.5144	0.7239	0.3948	0.4712	0.4076	0.4703	-	-	-	-
50	previously not reported	HCN1	5:45864843:A:G	5	45864843	G	A	5:45928837:A:G	rs6451835	5	45928837	A	G	0.936648	intergenic_variant	MODIFIER	-	-	-	-	-	-	-	-	-	-	rs6451835	-	-	-	-	-	-	-	-	0.5146	0.7239	0.3948	0.4712	0.4085	0.4703	-	-	-	-
50	previously not reported	HCN1	5:45864843:A:G	5	45864843	G	A	5:45928918:C:T	rs6451836	5	45928918	T	C	0.937298	intergenic_variant	MODIFIER	-	-	-	-	-	-	-	-	-	-	rs6451836	-	-	-	-	-	-	-	-	0.5148	0.7247	0.3948	0.4712	0.4085	0.4703	-	-	-	-
50	previously not reported	HCN1	5:45864843:A:G	5	45864843	G	A	5:45934605:A:G	rs10056175	5	45934605	A	G	0.935229	intergenic_variant	MODIFIER	-	-	-	-	-	-	-	-	-	-	rs10056175	-	-	-	-	-	-	-	-	0.515	0.7231	0.3948	0.4712	0.4105	0.4714	-	-	-	-
50	previously not reported	HCN1	5:45864843:A:G	5	45864843	G	A	5:45935162:C:T	rs6451838	5	45935162	C	T	0.941227	intergenic_variant	MODIFIER	-	-	-	-	-	-	-	-	-	-	rs6451838	-	-	-	-	-	-	-	-	0.5126	0.7231	0.3905	0.4712	0.4066	0.4663	-	-	-	-
50	previously not reported	HCN1	5:45864843:A:G	5	45864843	G	A	5:45935686:A:C	rs6451840	5	45935686	A	C	0.934642	intergenic_variant	MODIFIER	-	-	-	-	-	-	-	-	-	-	rs6451840	-	-	-	-	-	-	-	-	0.5144	0.7231	0.3919	0.4712	0.4105	0.4703	-	-	-	-
50	previously not reported	HCN1	5:45864843:A:G	5	45864843	G	A	5:45936533:C:T	rs6451842	5	45936533	T	C	0.932663	intergenic_variant	MODIFIER	-	-	-	-	-	-	-	-	-	-	rs6451842	-	-	-	-	-	-	-	-	0.5138	0.7209	0.3919	0.4712	0.4105	0.4703	-	-	-	-
50	previously not reported	HCN1	5:45864843:A:G	5	45864843	G	A	5:45938815:A:G	rs7719401	5	45938815	G	A	0.987035	intergenic_variant	MODIFIER	-	-	-	-	-	-	-	-	-	-	rs7719401	-	-	-	-	-	-	-	-	0.525	0.7504	0.3991	0.4712	0.4165	0.4765	-	-	-	-
50	previously not reported	HCN1	5:45864843:A:G	5	45864843	G	A	5:45939935:C:T	rs7706925	5	45939935	T	C	0.939896	intergenic_variant	MODIFIER	-	-	-	-	-	-	-	-	-	-	rs7706925	-	-	-	-	-	-	-	-	0.5122	0.7224	0.3919	0.4702	0.4066	0.4652	-	-	-	-
50	previously not reported	HCN1	5:45864843:A:G	5	45864843	G	A	5:45943118:C:T	rs7723218	5	45943118	T	C	0.941946	intergenic_variant	MODIFIER	-	-	-	-	-	-	-	-	-	-	rs7723218	-	-	-	-	-	-	-	-	-	-	-	-	-	-	-	-	-	-
50	previously not reported	HCN1	5:45864843:A:G	5	45864843	G	A	5:45945301:A:G	rs7727331	5	45945301	A	G	0.938136	intergenic_variant	MODIFIER	-	-	-	-	-	-	-	-	-	-	rs7727331	-	-	-	-	-	-	-	-	0.5138	0.7231	0.3919	0.4792	0.4046	0.4652	-	-	-	-
50	previously not reported	HCN1	5:45864843:A:G	5	45864843	G	A	5:45945880:C:T	rs35648163	5	45945880	T	C	0.987743	intergenic_variant	MODIFIER	-	-	-	-	-	-	-	-	-	-	rs35648163	-	-	-	-	-	-	-	-	0.5248	0.7504	0.3991	0.4722	0.4145	0.4765	-	-	-	-
50	previously not reported	HCN1	5:45864843:A:G	5	45864843	G	A	5:45946785:C:T	rs6451843	5	45946785	T	C	0.982009	intergenic_variant	MODIFIER	-	-	-	-	-	-	-	-	-	-	rs6451843	-	-	-	-	-	-	-	-	0.5264	0.7511	0.3991	0.4782	0.4155	0.4765	-	-	-	-
50	previously not reported	HCN1	5:45864843:A:G	5	45864843	G	A	5:45947440:C:T	rs34501453	5	45947440	C	T	0.925849	intergenic_variant	MODIFIER	-	-	-	-	-	-	-	-	-	-	rs34501453	-	-	-	-	-	-	-	-	0.5084	0.7103	0.389	0.4712	0.4036	0.4663	-	-	-	-
50	previously not reported	HCN1	5:45864843:A:G	5	45864843	G	A	5:45950414:D:I	rs34257292	5	45950414	D	I	0.856662	intergenic_variant	MODIFIER	-	-	-	-	-	-	-	-	-	-	rs34257292	-	-	-	-	-	-	-	-	0.4938	0.6543	0.379	0.4772	0.4046	0.4673	-	-	-	-
50	previously not reported	HCN1	5:45864843:A:G	5	45864843	G	A	5:45951829:D:I	rs35227894	5	45951829	I	T	0.809899	intergenic_variant	MODIFIER	-	-	-	-	-	-	-	-	-	-	rs35227894	-	-	-	-	-	-	-	-	0.4768	0.6399	0.3775	0.4603	0.4026	0.4202	-	-	-	-
50	previously not reported	HCN1	5:45864843:A:G	5	45864843	G	A	5:45954308:C:T	rs10213679	5	45954308	C	T	0.811092	intergenic_variant	MODIFIER	-	-	-	-	-	-	-	-	-	-	rs10213679	-	-	-	-	-	-	-	-	0.4772	0.6415	0.3775	0.4603	0.4026	0.4202	-	-	-	-
50	previously not reported	HCN1	5:45864843:A:G	5	45864843	G	A	5:45955601:A:G	rs4289566	5	45955601	G	A	0.810205	intergenic_variant	MODIFIER	-	-	-	-	-	-	-	-	-	-	rs4289566	-	-	-	-	-	-	-	-	0.477	0.6415	0.3775	0.4603	0.4036	0.4182	-	-	-	-
50	previously not reported	HCN1	5:45864843:A:G	5	45864843	G	A	5:45956719:C:T	rs4502836	5	45956719	T	C	0.838846	intergenic_variant	MODIFIER	-	-	-	-	-	-	-	-	-	-	rs4502836	-	-	-	-	-	-	-	-	-	-	-	-	-	-	-	-	-	-
50	previously not reported	HCN1	5:45864843:A:G	5	45864843	G	A	5:45960893:A:G	rs7443384	5	45960893	A	G	0.825089	intergenic_variant	MODIFIER	-	-	-	-	-	-	-	-	-	-	rs7443384	-	-	-	-	-	-	-	-	0.4864	0.643	0.3732	0.4812	0.3877	0.4622	-	-	-	-
50	previously not reported	HCN1	5:45864843:A:G	5	45864843	G	A	5:45960933:C:T	rs7443410	5	45960933	C	T	0.848617	intergenic_variant	MODIFIER	-	-	-	-	-	-	-	-	-	-	rs7443410	-	-	-	-	-	-	-	-	0.4892	0.643	0.3775	0.4712	0.4046	0.4663	-	-	-	-
50	previously not reported	HCN1	5:45864843:A:G	5	45864843	G	A	5:45963019:C:T	rs4490592	5	45963019	T	C	0.918578	intergenic_variant	MODIFIER	-	-	-	-	-	-	-	-	-	-	rs4490592	-	-	-	-	-	-	-	-	0.5056	0.6853	0.3876	0.4702	0.4135	0.4775	-	-	-	-
50	previously not reported	HCN1	5:45864843:A:G	5	45864843	G	A	5:45965439:G:T	rs4492125	5	45965439	G	T	0.842639	intergenic_variant	MODIFIER	-	-	-	-	-	-	-	-	-	-	rs4492125	-	-	-	-	-	-	-	-	0.4854	0.6377	0.3761	0.4643	0.4016	0.4652	-	-	-	-
50	previously not reported	HCN1	5:45864843:A:G	5	45864843	G	A	5:45967948:A:G	rs10043270	5	45967948	A	G	0.83258	intergenic_variant	MODIFIER	-	-	-	-	-	-	-	-	-	-	rs10043270	-	-	-	-	-	-	-	-	0.4894	0.6392	0.379	0.4752	0.4036	0.4683	-	-	-	-
50	previously not reported	HCN1	5:45864843:A:G	5	45864843	G	A	5:45968862:C:T	rs4473777	5	45968862	T	C	0.913544	intergenic_variant	MODIFIER	-	-	-	-	-	-	-	-	-	-	rs4473777	-	-	-	-	-	-	-	-	0.5044	0.6861	0.389	0.4653	0.4115	0.4765	-	-	-	-
50	previously not reported	HCN1	5:45864843:A:G	5	45864843	G	A	5:45970534:A:G	rs10062325	5	45970534	G	A	0.837066	intergenic_variant	MODIFIER	-	-	-	-	-	-	-	-	-	-	rs10062325	-	-	-	-	-	-	-	-	0.4878	0.6407	0.3775	0.4653	0.4016	0.4714	-	-	-	-
50	previously not reported	HCN1	5:45864843:A:G	5	45864843	G	A	5:45972040:D:I	rs77747861	5	45972040	D	I	0.911337	intergenic_variant	MODIFIER	-	-	-	-	-	-	-	-	-	-	rs77747861	-	-	-	-	-	-	-	-	0.5104	0.711	0.3905	0.4752	0.4016	0.4724	-	-	-	-
50	previously not reported	HCN1	5:45864843:A:G	5	45864843	G	A	5:45974881:C:T	rs4501347	5	45974881	T	C	0.90998	intergenic_variant	MODIFIER	-	-	-	-	-	-	-	-	-	-	rs4501347	-	-	-	-	-	-	-	-	0.5108	0.7118	0.3919	0.4752	0.4026	0.4714	-	-	-	-
50	previously not reported	HCN1	5:45864843:A:G	5	45864843	G	A	5:45979991:C:T	rs62372987	5	45979991	T	C	0.907835	intergenic_variant	MODIFIER	-	-	-	-	-	-	-	-	-	-	rs62372987	-	-	-	-	-	-	-	-	-	-	-	-	-	-	-	-	-	-
50	previously not reported	HCN1	5:45864843:A:G	5	45864843	G	A	5:45980056:A:G	rs111810259	5	45980056	A	G	0.901795	intergenic_variant	MODIFIER	-	-	-	-	-	-	-	-	-	-	rs111810259	-	-	-	-	-	-	-	-	0.51	0.7103	0.3919	0.4722	0.4026	0.4724	-	-	-	-
50	previously not reported	HCN1	5:45864843:A:G	5	45864843	G	A	5:45980269:A:G	rs79402747	5	45980269	A	G	0.959792	intergenic_variant	MODIFIER	-	-	-	-	-	-	-	-	-	-	rs4352604	-	-	-	-	-	-	-	-	0.5258	0.7489	0.402	0.4722	0.4125	0.4836	-	-	-	-
50	previously not reported	HCN1	5:45864843:A:G	5	45864843	G	A	5:45983054:A:C	rs4492122	5	45983054	A	C	0.919722	intergenic_variant	MODIFIER	-	-	-	-	-	-	-	-	-	-	rs4492122	-	-	-	-	-	-	-	-	-	0.7141	0.3905	0.4722	0.4026	0.4744	-	-	-	-
50	previously not reported	HCN1	5:45864843:A:G	5	45864843	G	A	5:45983222:A:G	rs4371763	5	45983222	A	G	0.911286	intergenic_variant	MODIFIER	-	-	-	-	-	-	-	-	-	-	rs4371763	-	-	-	-	-	-	-	-	0.5112	0.711	0.3919	0.4812	0.4036	0.4673	-	-	-	-
50	previously not reported	HCN1	5:45864843:A:G	5	45864843	G	A	5:45992174:C:T	rs8188180	5	45992174	C	T	0.913661	intergenic_variant	MODIFIER	-	-	-	-	-	-	-	-	-	-	rs8188180	-	-	-	-	-	-	-	-	0.5094	0.7103	0.3919	0.4792	0.4006	0.4642	-	-	-	-
50	previously not reported	HCN1	5:45864843:A:G	5	45864843	G	A	5:45996856:D:I	rs71612314	5	45996856	D	I	0.862245	intergenic_variant	MODIFIER	-	-	-	-	-	-	-	-	-	-	rs71612314	-	-	-	-	-	-	-	-	0.498	0.6687	0.3833	0.4831	0.4006	0.4642	-	-	-	-
50	previously not reported	HCN1	5:45864843:A:G	5	45864843	G	A	5:45998264:A:G	rs57299032	5	45998264	A	G	0.903509	intergenic_variant	MODIFIER	-	-	-	-	-	-	-	-	-	-	rs57299032	-	-	-	-	-	-	-	-	0.5148	0.7126	0.3905	0.4831	0.4026	0.4836	-	-	-	-
50	previously not reported	HCN1	5:45864843:A:G	5	45864843	G	A	5:46004086:A:G	rs7293482	5	46004086	A	G	0.90607	intergenic_variant	MODIFIER	-	-	-	-	-	-	-	-	-	-	rs7293482	-	-	-	-	-	-	-	-	0.5134	0.7103	0.3905	0.4831	0.4026	0.4796	-	-	-	-
50	previously not reported	HCN1	5:45864843:A:G	5	45864843	G	A	5:46011475:C:T	rs4569880	5	46011475	T	C	0.908642	intergenic_variant	MODIFIER	-	-	-	-	-	-	-	-	-	-	rs4569880	-	-	-	-	-	-	-	-	0.5126	0.7118	0.3905	0.4851	0.4036	0.4703	-	-	-	-
50	previously not reported	HCN1	5:45864843:A:G	5	45864843	G	A	5:46011769:C:T	rs4569881	5	46011769	T	C	0.909472	intergenic_variant	MODIFIER	-	-	-	-	-	-	-	-	-	-	rs4569881	-	-	-	-	-	-	-	-	0.512	0.711	0.3905	0.4831	0.4036	0.4703	-	-	-	-
50	previously not reported	HCN1	5:45864843:A:G	5	45864843	G	A	5:46011812:A:T	rs4551075	5	46011812	A	T	0.957606	intergenic_variant	MODIFIER	-	-	-	-	-	-	-	-	-	-	rs4551075	-	-	-	-	-	-	-	-	0.5248	0.7466	0.3948	0.4821	0.4076	0.4816	-	-	-	-
50	previously not reported	HCN1	5:45864843:A:G	5	45864843	G	A	5:46013453:C:G	rs13362078	5	46013453	G	C	0.910284	intergenic_variant	MODIFIER	-	-	-	-	-	-	-	-	-	-	rs13362078	-	-	-	-	-	-	-	-	-	-	-	-	-	-	-	-	-	-
50	previously not reported	HCN1	5:45864843:A:G	5	45864843	G	A	5:46016917:C:G	rs13168838	5	46016917	G	C	0.888523	intergenic_variant	MODIFIER	-	-	-	-	-	-	-	-	-	-	rs13168838	-	-	-	-	-	-	-	-	-	0.7156	0.4006	0.4851	0.4215	0.4703	-	-	-	-
50	previously not reported	HCN1	5:45864843:A:G	5	45864843	G	A	5:46019005:G:T	rs4489075	5	46019005	G	T	0.911474	intergenic_variant	MODIFIER	-	-	-	-	-	-	-	-	-	-	rs4489075	-	-	-	-	-	-	-	-	0.5126	0.7126	0.3905	0.4851	0.4016	0.4714	-	-	-	-
50	previously not reported	HCN1	5:45864843:A:G	5	45864843	G	A	5:46019167:A:G	rs4302598	5	46019167	A	G	0.887716	intergenic_variant	MODIFIER	-	-	-	-	-	-	-	-	-	-	rs4302598	-	-	-	-	-	-	-	-	0.5188	0.7156	0.4006	0.4861	0.4215	0.4703	-	-	-	-
50	previously not reported	HCN1	5:45864843:A:G	5	45864843	G	A	5:46020792:A:G	rs10052339	5	46020792	G	A	0.961918	intergenic_variant	MODIFIER	-	-	-	-	-	-	-	-	-	-	rs10052339	-	-	-	-	-	-	-	-	-	0.7466	0.3963	0.4821	0.4056	0.4826	-	-	-	-
50	previously not reported	HCN1	5:45864843:A:G	5	45864843	G	A	5:46026032:C:T	rs10043248	5	46026032	T	C	0.903952	intergenic_variant	MODIFIER	-	-	-	-	-	-	-	-	-	-	rs10043248	-	-	-	-	-	-	-	-	0.5379	0.7549	0.4294	0.4831	0.4443	0.4744	-	-	-	-
50	previously not reported	HCN1	5:45864843:A:G	5	45864843	G	A	5:46026057:A:G	rs10045812	5	46026057	A	G	0.878001	intergenic_variant	MODIFIER	-	-	-	-	-	-	-	-	-	-	rs10045812	-	-	-	-	-	-	-	-	-	-	-	-	-	-	-	-	-	-
50	previously not reported	HCN1	5:45864843:A:G	5	45864843	G	A	5:46027702:D:I	rs10067132	5	46027702	D	I	0.903982	intergenic_variant	MODIFIER	-	-	-	-	-	-	-	-	-	-	rs10067132	-	-	-	-	-	-	-	-	-	0	0.0043	0	0.008	0	-	-	-	-
50	previously not reported	HCN1	5:45864843:A:G	5	45864843	G	A	5:46030777:C:T	rs10070274	5	46030777	T	C	0.871633	intergenic_variant	MODIFIER	-	-	-	-	-	-	-	-	-	-	rs10070274	-	-	-	-	-	-	-	-	0.5116	0.7027	0.3991	0.4812	0.4185	0.4601	-	-	-	-
50	previously not reported	HCN1	5:45864843:A:G	5	45864843	G	A	5:46032463:C:T	rs55749222	5	46032463	T	C	0.89363	intergenic_variant	MODIFIER	-	-	-	-	-	-	-	-	-	-	rs55749222	-	-	-	-	-	-	-	-	0.5084	0.7005	0.3919	0.4821	0.4066	0.4632	-	-	-	-
50	previously not reported	HCN1	5:45864843:A:G	5	45864843	G	A	5:46034492:C:T	rs4499842	5	46034492	C	T	0.887113	intergenic_variant	MODIFIER	-	-	-	-	-	-	-	-	-	-	rs4499842	-	-	-	-	-	-	-	-	0.5148	0.7126	0.4006	0.4821	0.4185	0.4611	-	-	-	-
50	previously not reported	HCN1	5:45864843:A:G	5	45864843	G	A	5:46036554:A:G	rs12654375	5	46036554	A	G	0.878975	intergenic_variant	MODIFIER	-	-	-	-	-	-	-	-	-	-	rs12654375	-	-	-	-	-	-	-	-	0.5144	0.708	0.402	0.4821	0.4215	0.4611	-	-	-	-
50	previously not reported	HCN1	5:45864843:A:G	5	45864843	G	A	5:46036965:G:T	rs10054419	5	46036965	T	G	0.88414	intergenic_variant	MODIFIER	-	-	-	-	-	-	-	-	-	-	rs10054419	-	-	-	-	-	-	-	-	0.5184	0.7179	0.4035	0.4831	0.4215	0.4663	-	-	-	-
50	previously not reported	HCN1	5:45864843:A:G	5	45864843	G	A	5:46038106:A:G	rs4409106	5	46038106	A	G	0.884797	intergenic_variant	MODIFIER	-	-	-	-	-	-	-	-	-	-	rs4409106	-	-	-	-	-	-	-	-	0.517	0.7148	0.4092	0.4821	0.4205	0.4611	-	-	-	-
50	previously not reported	HCN1	5:45864843:A:G	5	45864843	G	A	5:46045351:G:T	rs8188064	5	46045351	T	G	0.875774	intergenic_variant	MODIFIER	-	-	-	-	-	-	-	-	-	-	rs8188064	-	-	-	-	-	-	-	-	0.5238	0.7186	0.4035	0.4821	0.4235	0.4918	-	-	-	-
50	previously not reported	HCN1	5:45864843:A:G	5	45864843	G	A	5:46046834:A:G	rs8175432	5	46046834	A	G	0.884999	intergenic_variant	MODIFIER	-	-	-	-	-	-	-	-	-	-	rs8175432	-	-	-	-	-	-	-	-	0.5192	0.7156	0.3948	0.4841	0.4235	0.4765	-	-	-	-
50	previously not reported	HCN1	5:45864843:A:G	5	45864843	G	A	5:46047306:A:G	rs4362951	5	46047306	A	G	0.910621	intergenic_variant	MODIFIER	-	-	-	-	-	-	-	-	-	-	rs4362951	-	-	-	-	-	-	-	-	0.514	0.7141	0.3905	0.4841	0.4026	0.4765	-	-	-	-
50	previously not reported	HCN1	5:45864843:A:G	5	45864843	G	A	5:46048668:A:G	rs4370277	5	46048668	A	G	0.886975	intergenic_variant	MODIFIER	-	-	-	-	-	-	-	-	-	-	rs4370277	-	-	-	-	-	-	-	-	0.5206	0.7171	0.4006	0.4841	0.4254	0.4755	-	-	-	-
50	previously not reported	HCN1	5:45864843:A:G	5	45864843	G	A	5:46048859:A:T	rs4484447	5	46048859	A	T	0.887643	intergenic_variant	MODIFIER	-	-	-	-	-	-	-	-	-	-	rs4484447	-	-	-	-	-	-	-	-	0.5204	0.7171	0.4006	0.4831	0.4264	0.4744	-	-	-	-
50	previously not reported	HCN1	5:45864843:A:G	5	45864843	G	A	5:46050796:D:I	rs60933972	5	46050796	I	C	0.95833	intergenic_variant	MODIFIER	-	-	-	-	-	-	-	-	-	-	rs60933972	-	-	-	-	-	-	-	-	0.5246	0.7458	0.3963	0.4831	0.4046	0.4826	-	-	-	-
50	previously not reported	HCN1	5:45864843:A:G	5	45864843	G	A	5:46050992:C:G	rs4383730	5	46050992	C	G	0.935948	intergenic_variant	MODIFIER	-	-	-	-	-	-	-	-	-	-	rs4383730	-	-	-	-	-	-	-	-	-	0.7526	0.4049	0.4841	0.4264	0.4826	-	-	-	-
50	previously not reported	HCN1	5:45864843:A:G	5	45864843	G	A	5:46051386:C:T	rs4431354	5	46051386	T	C	0.890395	intergenic_variant	MODIFIER	-	-	-	-	-	-	-	-	-	-	rs4431354	-	-	-	-	-	-	-	-	0.5196	0.7163	0.3991	0.4851	0.4235	0.4734	-	-	-	-
50	previously not reported	HCN1	5:45864843:A:G	5	45864843	G	A	5:46051668:A:G	rs4389698	5	46051668	A	G	0.893842	intergenic_variant	MODIFIER	-	-	-	-	-	-	-	-	-	-	rs4389698	-	-	-	-	-	-	-	-	0.5186	0.7156	0.3991	0.4861	0.4195	0.4724	-	-	-	-
50	previously not reported	HCN1	5:45864843:A:G	5	45864843	G	A	5:46053564:C:T	rs8188026	5	46053564	C	T	0.880689	intergenic_variant	MODIFIER	-	-	-	-	-	-	-	-	-	-	rs8188026	-	-	-	-	-	-	-	-	0.5048	0.6868	0.3876	0.4831	0.4006	0.4714	-	-	-	-
50	previously not reported	HCN1	5:45864843:A:G	5	45864843	G	A	5:46055601:C:G	rs4426925	5	46055601	G	C	0.893866	intergenic_variant	MODIFIER	-	-	-	-	-	-	-	-	-	-	rs4426925	-	-	-	-	-	-	-	-	0.5178	0.7148	0.3991	0.4841	0.4185	0.4724	-	-	-	-
50	previously not reported	HCN1	5:45864843:A:G	5	45864843	G	A	5:46060869:A:G	rs4541667	5	46060869	A	G	0.923727	intergenic_variant	MODIFIER	-	-	-	-	-	-	-	-	-	-	rs4541667	-	-	-	-	-	-	-	-	0.5345	0.7526	0.4049	0.4831	0.4304	0.4918	-	-	-	-
50	previously not reported	HCN1	5:45864843:A:G	5	45864843	G	A	5:46061985:A:G	rs8188072	5	46061985	A	G	0.879346	intergenic_variant	MODIFIER	-	-	-	-	-	-	-	-	-	-	rs8188072	-	-	-	-	-	-	-	-	0.5204	0.7163	0.402	0.4821	0.4254	0.4765	-	-	-	-
50	previously not reported	HCN1	5:45864843:A:G	5	45864843	G	A	5:46063136:A:G	rs4441886	5	46063136	G	A	0.884929	intergenic_variant	MODIFIER	-	-	-	-	-	-	-	-	-	-	rs4441886	-	-	-	-	-	-	-	-	0.48	0.2837	0.5994	0.5169	0.5736	0.5266	-	-	-	-
50	previously not reported	HCN1	5:45864843:A:G	5	45864843	G	A	5:46065959:A:G	rs4367307	5	46065959	A	G	0.88533	intergenic_variant	MODIFIER	-	-	-	-	-	-	-	-	-	-	rs4367307	-	-	-	-	-	-	-	-	-	-	-	-	-	-	-	-	-	-
50	previously not reported	HCN1	5:45864843:A:G	5	45864843	G	A	5:46067629:A:G	rs10941722	5	46067629	G	A	0.884999	intergenic_variant	MODIFIER	-	-	-	-	-	-	-	-	-	-	rs10941722	-	-	-	-	-	-	-	-	0.4808	0.2844	0.5994	0.5169	0.5775	0.5256	-	-	-	-
50	previously not reported	HCN1	5:45864843:A:G	5	45864843	G	A	5:46067723:A:C	rs12186454	5	46067723	A	C	0.868165	intergenic_variant	MODIFIER	-	-	-	-	-	-	-	-	-	-	rs12186454	-	-	-	-	-	-	-	-	0.486	0.2844	0.6052	0.5169	0.5934	0.5317	-	-	-	-
50	previously not reported	HCN1	5:45864843:A:G	5	45864843	G	A	5:46069343:C:T	rs4421114	5	46069343	C	T	0.87125	intergenic_variant	MODIFIER	-	-	-	-	-	-	-	-	-	-	rs4421114	-	-	-	-	-	-	-	-	0.4766	0.2837	0.5994	0.502	0.5755	0.5225	-	-	-	-
50	previously not reported	HCN1	5:45864843:A:G	5	45864843	G	A	5:46072730:A:G	rs10050829	5	46072730	A	G	0.890048	intergenic_variant	MODIFIER	-	-	-	-	-	-	-	-	-	-	rs10050829	-	-	-	-	-	-	-	-	0.4822	0.2844	0.6009	0.5188	0.5785	0.5286	-	-	-	-
50	previously not reported	HCN1	5:45864843:A:G	5	45864843	G	A	5:46072905:A:G	rs10067655	5	46072905	G	A	0.889306	intergenic_variant	MODIFIER	-	-	-	-	-	-	-	-	-	-	rs10067655	-	-	-	-	-	-	-	-	0.482	0.2844	0.6009	0.5188	0.5775	0.5286	-	-	-	-
50	previously not reported	HCN1	5:45864843:A:G	5	45864843	G	A	5:46073947:G:T	rs57407363	5	46073947	G	T	0.938095	intergenic_variant	MODIFIER	-	-	-	-	-	-	-	-	-	-	rs57407363	-	-	-	-	-	-	-	-	0.4681	0.2474	0.5951	0.5188	0.5746	0.5143	-	-	-	-
50	previously not reported	HCN1	5:45864843:A:G	5	45864843	G	A	5:46078122:A:T	rs13354272	5	46078122	A	T	0.888521	intergenic_variant	MODIFIER	-	-	-	-	-	-	-	-	-	-	rs13354272	-	-	-	-	-	-	-	-	0.4826	0.2882	0.6009	0.5188	0.5785	0.5256	-	-	-	-
50	previously not reported	HCN1	5:45864843:A:G	5	45864843	G	A	5:46078410:C:T	rs13361118	5	46078410	T	C	0.886631	intergenic_variant	MODIFIER	-	-	-	-	-	-	-	-	-	-	rs13361118	-	-	-	-	-	-	-	-	0.4832	0.2882	0.6009	0.5188	0.5785	0.5286	-	-	-	-
50	previously not reported	HCN1	5:45864843:A:G	5	45864843	G	A	5:46079337:A:G	rs4498260	5	46079337	G	A	0.888541	intergenic_variant	MODIFIER	-	-	-	-	-	-	-	-	-	-	rs4498260	-	-	-	-	-	-	-	-	0.4822	0.2867	0.6009	0.5179	0.5795	0.5256	-	-	-	-
50	previously not reported	HCN1	5:45864843:A:G	5	45864843	G	A	5:46080887:C:T	rs4274990	5	46080887	C	T	0.888541	intergenic_variant	MODIFIER	-	-	-	-	-	-	-	-	-	-	rs4274990	-	-	-	-	-	-	-	-	0.4822	0.2859	0.6009	0.5198	0.5785	0.5256	-	-	-	-
50	previously not reported	HCN1	5:45864843:A:G	5	45864843	G	A	5:46083229:A:G	rs8188009	5	46083229	G	A	0.855045	intergenic_variant	MODIFIER	-	-	-	-	-	-	-	-	-	-	rs8188009	-	-	-	-	-	-	-	-	0.49	0.3139	0.6037	0.5198	0.5785	0.5256	-	-	-	-
50	previously not reported	HCN1	5:45864843:A:G	5	45864843	G	A	5:46084439:A:G	rs10064905	5	46084439	A	G	0.934613	intergenic_variant	MODIFIER	-	-	-	-	-	-	-	-	-	-	rs10064905	-	-	-	-	-	-	-	-	0.4683	0.2466	0.5951	0.5179	0.5746	0.5174	-	-	-	-
50	previously not reported	HCN1	5:45864843:A:G	5	45864843	G	A	5:46090514:C:T	rs10059426	5	46090514	T	C	0.855462	intergenic_variant	MODIFIER	-	-	-	-	-	-	-	-	-	-	rs10059426	-	-	-	-	-	-	-	-	0.4894	0.3101	0.6037	0.5188	0.5815	0.5256	-	-	-	-
50	previously not reported	HCN1	5:45864843:A:G	5	45864843	G	A	5:46090865:A:G	rs8185144	5	46090865	G	A	0.858686	intergenic_variant	MODIFIER	-	-	-	-	-	-	-	-	-	-	rs8185144	-	-	-	-	-	-	-	-	0.4884	0.3094	0.6037	0.5179	0.5785	0.5256	-	-	-	-
50	previously not reported	HCN1	5:45864843:A:G	5	45864843	G	A	5:46091267:A:G	rs4292455	5	46091267	G	A	0.858006	intergenic_variant	MODIFIER	-	-	-	-	-	-	-	-	-	-	rs4292455	-	-	-	-	-	-	-	-	0.4886	0.3094	0.6037	0.5179	0.5785	0.5266	-	-	-	-
50	previously not reported	HCN1	5:45864843:A:G	5	45864843	G	A	5:46091291:C:T	rs4533899	5	46091291	C	T	0.858006	intergenic_variant	MODIFIER	-	-	-	-	-	-	-	-	-	-	rs4533899	-	-	-	-	-	-	-	-	0.4886	0.3094	0.6037	0.5179	0.5785	0.5266	-	-	-	-
50	previously not reported	HCN1	5:45864843:A:G	5	45864843	G	A	5:46097487:A:G	rs10066479	5	46097487	G	A	0.855462	intergenic_variant	MODIFIER	-	-	-	-	-	-	-	-	-	-	rs10066479	-	-	-	-	-	-	-	-	0.4894	0.3109	0.6037	0.5188	0.5775	0.5286	-	-	-	-
50	previously not reported	HCN1	5:45864843:A:G	5	45864843	G	A	5:46098606:C:T	rs12515804	5	46098606	C	T	0.8575	intergenic_variant	MODIFIER	-	-	-	-	-	-	-	-	-	-	rs12515804	-	-	-	-	-	-	-	-	0.4888	0.3079	0.6037	0.5188	0.5785	0.5286	-	-	-	-
50	previously not reported	HCN1	5:45864843:A:G	5	45864843	G	A	5:46098785:A:G	rs12520938	5	46098785	A	G	0.933777	intergenic_variant	MODIFIER	-	-	-	-	-	-	-	-	-	-	rs12520938	-	-	-	-	-	-	-	-	0.4692	0.2496	0.5951	0.5188	0.5746	0.5174	-	-	-	-
50	previously not reported	HCN1	5:45864843:A:G	5	45864843	G	A	5:46100310:G:T	rs10941740	5	46100310	G	T	0.933042	intergenic_variant	MODIFIER	-	-	-	-	-	-	-	-	-	-	rs10941740	-	-	-	-	-	-	-	-	0.4694	0.2489	0.5951	0.5208	0.5746	0.5174	-	-	-	-
50	previously not reported	HCN1	5:45864843:A:G	5	45864843	G	A	5:46102760:A:G	rs72755668	5	46102760	G	A	0.854876	intergenic_variant	MODIFIER	-	-	-	-	-	-	-	-	-	-	rs72755668	-	-	-	-	-	-	-	-	0.4862	0.3011	0.6023	0.5179	0.5785	0.5266	-	-	-	-
50	previously not reported	HCN1	5:45864843:A:G	5	45864843	G	A	5:46104048:C:T	rs10042199	5	46104048	C	T	0.851545	intergenic_variant	MODIFIER	-	-	-	-	-	-	-	-	-	-	rs10042199	-	-	-	-	-	-	-	-	0.4856	0.2988	0.6023	0.5188	0.5785	0.5256	-	-	-	-
50	previously not reported	HCN1	5:45864843:A:G	5	45864843	G	A	5:46106163:G:T	rs7720482	5	46106163	T	G	0.856646	intergenic_variant	MODIFIER	-	-	-	-	-	-	-	-	-	-	rs7720482	-	-	-	-	-	-	-	-	0.489	0.3086	0.6066	0.5198	0.5785	0.5256	-	-	-	-
50	previously not reported	HCN1	5:45864843:A:G	5	45864843	G	A	5:46115369:C:G	rs6884716	5	46115369	C	G	0.852255	intergenic_variant	MODIFIER	-	-	-	-	-	-	-	-	-	-	rs6884716	-	-	-	-	-	-	-	-	0.5096	0.6914	0.3963	0.4782	0.4215	0.4673	-	-	-	-
50	previously not reported	HCN1	5:45864843:A:G	5	45864843	G	A	5:46120378:C:T	rs112393756	5	46120378	C	T	0.855966	intergenic_variant	MODIFIER	-	-	-	-	-	-	-	-	-	-	rs8175398	-	-	-	-	-	-	-	-	0.5108	0.6906	0.3963	0.4782	0.4215	0.4744	-	-	-	-
50	previously not reported	HCN1	5:45864843:A:G	5	45864843	G	A	5:46121806:C:T	rs8185016	5	46121806	T	C	0.856646	intergenic_variant	MODIFIER	-	-	-	-	-	-	-	-	-	-	rs8185016	-	-	-	-	-	-	-	-	0.511	0.6914	0.3963	0.4782	0.4215	0.4744	-	-	-	-
50	previously not reported	HCN1	5:45864843:A:G	5	45864843	G	A	5:46121882:C:T	rs8185209	5	46121882	C	T	0.856646	intergenic_variant	MODIFIER	-	-	-	-	-	-	-	-	-	-	rs8185209	-	-	-	-	-	-	-	-	0.511	0.6914	0.3963	0.4782	0.4215	0.4744	-	-	-	-
50	previously not reported	HCN1	5:45864843:A:G	5	45864843	G	A	5:46122066:A:T	rs8188167	5	46122066	A	T	0.856646	intergenic_variant	MODIFIER	-	-	-	-	-	-	-	-	-	-	rs8188167	-	-	-	-	-	-	-	-	0.511	0.6914	0.3963	0.4782	0.4215	0.4744	-	-	-	-
50	previously not reported	HCN1	5:45864843:A:G	5	45864843	G	A	5:46122530:C:G	rs8188193	5	46122530	C	G	0.85233	intergenic_variant	MODIFIER	-	-	-	-	-	-	-	-	-	-	rs8188193	-	-	-	-	-	-	-	-	0.511	0.6899	0.3977	0.4782	0.4225	0.4744	-	-	-	-
50	previously not reported	HCN1	5:45864843:A:G	5	45864843	G	A	5:46123701:C:T	rs10040808	5	46123701	T	C	0.827665	intergenic_variant	MODIFIER	-	-	-	-	-	-	-	-	-	-	rs10040808	-	-	-	-	-	-	-	-	0.5184	0.6944	0.4035	0.4792	0.4463	0.4765	-	-	-	-
50	previously not reported	HCN1	5:45864843:A:G	5	45864843	G	A	5:46124585:C:T	rs12656601	5	46124585	T	C	0.829798	intergenic_variant	MODIFIER	-	-	-	-	-	-	-	-	-	-	rs12656601	-	-	-	-	-	-	-	-	0.5186	0.6936	0.4035	0.4792	0.4463	0.4785	-	-	-	-
50	previously not reported	HCN1	5:45864843:A:G	5	45864843	G	A	5:46125490:A:T	rs8185098	5	46125490	A	T	0.898585	intergenic_variant	MODIFIER	-	-	-	-	-	-	-	-	-	-	rs8185098	-	-	-	-	-	-	-	-	0.5369	0.7519	0.4193	0.4692	0.4503	0.4888	-	-	-	-
50	previously not reported	HCN1	5:45864843:A:G	5	45864843	G	A	5:46125600:A:G	rs8175395	5	46125600	A	G	0.828321	intergenic_variant	MODIFIER	-	-	-	-	-	-	-	-	-	-	rs8175395	-	-	-	-	-	-	-	-	0.519	0.6929	0.4107	0.4782	0.4463	0.4775	-	-	-	-
50	previously not reported	HCN1	5:45864843:A:G	5	45864843	G	A	5:46129026:G:T	rs13156708	5	46129026	T	G	0.824498	intergenic_variant	MODIFIER	-	-	-	-	-	-	-	-	-	-	rs13156708	-	-	-	-	-	-	-	-	-	-	-	-	-	-	-	-	-	-
50	previously not reported	HCN1	5:45864843:A:G	5	45864843	G	A	5:46129406:G:T	rs13157345	5	46129406	T	G	0.827726	intergenic_variant	MODIFIER	-	-	-	-	-	-	-	-	-	-	rs13157345	-	-	-	-	-	-	-	-	0.5188	0.6921	0.4107	0.4782	0.4453	0.4785	-	-	-	-
50	previously not reported	HCN1	5:45864843:A:G	5	45864843	G	A	5:46131179:C:G	rs7293302	5	46131179	G	C	0.827726	intergenic_variant	MODIFIER	-	-	-	-	-	-	-	-	-	-	rs7293302	-	-	-	-	-	-	-	-	0.5188	0.6921	0.4107	0.4782	0.4453	0.4785	-	-	-	-
50	previously not reported	HCN1	5:45864843:A:G	5	45864843	G	A	5:46131655:A:G	rs13186103	5	46131655	A	G	0.825023	intergenic_variant	MODIFIER	-	-	-	-	-	-	-	-	-	-	rs13186103	-	-	-	-	-	-	-	-	0.5192	0.6921	0.4092	0.4782	0.4453	0.4816	-	-	-	-
50	previously not reported	HCN1	5:45864843:A:G	5	45864843	G	A	5:46133345:D:I	rs57769942	5	46133345	D	I	0.826394	intergenic_variant	MODIFIER	-	-	-	-	-	-	-	-	-	-	rs57769942	-	-	-	-	-	-	-	-	0.5188	0.6921	0.4107	0.4782	0.4453	0.4785	-	-	-	-
50	previously not reported	HCN1	5:45864843:A:G	5	45864843	G	A	5:46135280:A:T	rs6451851	5	46135280	T	A	0.829293	intergenic_variant	MODIFIER	-	-	-	-	-	-	-	-	-	-	rs6451851	-	-	-	-	-	-	-	-	0.5176	0.6914	0.4035	0.4782	0.4453	0.4785	-	-	-	-
50	previously not reported	HCN1	5:45864843:A:G	5	45864843	G	A	5:46138228:C:G	rs6414909	5	46138228	C	G	0.826332	intergenic_variant	MODIFIER	-	-	-	-	-	-	-	-	-	-	rs6414909	-	-	-	-	-	-	-	-	0.5184	0.6906	0.4107	0.4782	0.4453	0.4785	-	-	-	-
50	previously not reported	HCN1	5:45864843:A:G	5	45864843	G	A	5:46139676:C:T	rs7720870	5	46139676	C	T	0.881659	intergenic_variant	MODIFIER	-	-	-	-	-	-	-	-	-	-	rs7720870	-	-	-	-	-	-	-	-	0.5403	0.7489	0.4207	0.4871	0.4583	0.4826	-	-	-	-
50	previously not reported	HCN1	5:45864843:A:G	5	45864843	G	A	5:46143549:A:C	rs7713759	5	46143549	C	A	0.801061	intergenic_variant	MODIFIER	-	-	-	-	-	-	-	-	-	-	rs7713759	-	-	-	-	-	-	-	-	0.5128	0.6868	0.4049	0.4812	0.4284	0.4734	-	-	-	-
50	previously not reported	HCN1	5:45864843:A:G	5	45864843	G	A	5:46151409:C:T	rs10072945	5	46151409	C	T	0.815539	intergenic_variant	MODIFIER	-	-	-	-	-	-	-	-	-	-	rs10072945	-	-	-	-	-	-	-	-	0.5166	0.6861	0.4092	0.4792	0.4453	0.4755	-	-	-	-
50	previously not reported	HCN1	5:45864843:A:G	5	45864843	G	A	5:46153148:D:I	rs35982165	5	46153148	D	I	0.818307	intergenic_variant	MODIFIER	-	-	-	-	-	-	-	-	-	-	rs35982165	-	-	-	-	-	-	-	-	0.5174	0.6876	0.4092	0.4792	0.4453	0.4775	-	-	-	-
50	previously not reported	HCN1	5:45864843:A:G	5	45864843	G	A	5:46155237:A:G	rs13155082	5	46155237	A	G	0.818307	intergenic_variant	MODIFIER	-	-	-	-	-	-	-	-	-	-	rs13155082	-	-	-	-	-	-	-	-	0.5174	0.6876	0.4092	0.4792	0.4453	0.4775	-	-	-	23300278
50	previously not reported	HCN1	5:45864843:A:G	5	45864843	G	A	5:46160697:C:T	rs10038249	5	46160697	T	C	0.895239	intergenic_variant	MODIFIER	-	-	-	-	-	-	-	-	-	-	rs10038249	-	-	-	-	-	-	-	-	0.5367	0.7458	0.4193	0.4782	0.4503	0.4867	-	-	-	-
50	previously not reported	HCN1	5:45864843:A:G	5	45864843	G	A	5:46160787:C:T	rs8185226	5	46160787	T	C	0.813811	intergenic_variant	MODIFIER	-	-	-	-	-	-	-	-	-	-	rs8185226	-	-	-	-	-	-	-	-	0.516	0.6831	0.4107	0.4772	0.4463	0.4765	-	-	-	-
50	previously not reported	HCN1	5:45864843:A:G	5	45864843	G	A	5:46165293:A:G	rs8185376	5	46165293	A	G	0.819048	intergenic_variant	MODIFIER	-	-	-	-	-	-	-	-	-	-	rs8185376	-	-	-	-	-	-	-	-	0.5172	0.6876	0.4107	0.4772	0.4463	0.4765	-	-	-	-
50	previously not reported	HCN1	5:45864843:A:G	5	45864843	G	A	5:46165780:C:G	rs6451854	5	46165780	C	G	0.810333	intergenic_variant	MODIFIER	-	-	-	-	-	-	-	-	-	-	rs6451854	-	-	-	-	-	-	-	-	0.5152	0.6808	0.4092	0.4772	0.4463	0.4765	-	-	-	-
50	previously not reported	HCN1	5:45864843:A:G	5	45864843	G	A	5:46169317:A:G	rs8185217	5	46169317	G	A	0.81067	intergenic_variant	MODIFIER	-	-	-	-	-	-	-	-	-	-	rs8185217	-	-	-	-	-	-	-	-	0.5162	0.6838	0.4092	0.4782	0.4463	0.4765	-	-	-	-
50	previously not reported	HCN1	5:45864843:A:G	5	45864843	G	A	5:46173558:G:T	rs11958686	5	46173558	T	G	0.801291	intergenic_variant	MODIFIER	-	-	-	-	-	-	-	-	-	-	rs11958686	-	-	-	-	-	-	-	-	0.519	0.6823	0.4135	0.4782	0.4523	0.4836	-	-	-	-
50	previously not reported	HCN1	5:45864843:A:G	5	45864843	G	A	5:46187026:A:G	rs8188231	5	46187026	A	G	0.817564	intergenic_variant	MODIFIER	-	-	-	-	-	-	-	-	-	-	rs8188231	-	-	-	-	-	-	-	-	0.5218	0.6914	0.415	0.4782	0.4533	0.4836	-	-	-	-
50	previously not reported	HCN1	5:45864843:A:G	5	45864843	G	A	5:46187386:G:T	rs8188258	5	46187386	G	T	0.817538	intergenic_variant	MODIFIER	-	-	-	-	-	-	-	-	-	-	rs8188258	-	-	-	-	-	-	-	-	0.5222	0.6921	0.415	0.4792	0.4533	0.4836	-	-	-	-
50	previously not reported	HCN1	5:45864843:A:G	5	45864843	G	A	5:46190695:A:G	rs10065920	5	46190695	A	G	0.816834	intergenic_variant	MODIFIER	-	-	-	-	-	-	-	-	-	-	rs10065920	-	-	-	-	-	-	-	-	0.522	0.6914	0.4164	0.4782	0.4533	0.4836	-	-	-	-
50	previously not reported	HCN1	5:45864843:A:G	5	45864843	G	A	5:46191504:A:T	rs8188292	5	46191504	T	A	0.816699	intergenic_variant	MODIFIER	-	-	-	-	-	-	-	-	-	-	rs8188292	-	-	-	-	-	-	-	-	0.5224	0.6921	0.4164	0.4792	0.4533	0.4836	-	-	-	-
50	previously not reported	HCN1	5:45864843:A:G	5	45864843	G	A	5:46192671:D:I	rs35951649	5	46192671	I	G	0.817429	intergenic_variant	MODIFIER	-	-	-	-	-	-	-	-	-	-	rs35951649	-	-	-	-	-	-	-	-	0.5222	0.6921	0.4164	0.4782	0.4533	0.4836	-	-	-	-
50	previously not reported	HCN1	5:45864843:A:G	5	45864843	G	A	5:46193061:C:T	rs10064829	5	46193061	T	C	0.808235	intergenic_variant	MODIFIER	-	-	-	-	-	-	-	-	-	-	rs10064829	-	-	-	-	-	-	-	-	0.5204	0.6884	0.4164	0.4772	0.4513	0.4826	-	-	-	-
50	previously not reported	HCN1	5:45864843:A:G	5	45864843	G	A	5:46193462:C:T	rs8175415	5	46193462	T	C	0.816809	intergenic_variant	MODIFIER	-	-	-	-	-	-	-	-	-	-	rs8175415	-	-	-	-	-	-	-	-	0.5224	0.6921	0.4164	0.4792	0.4533	0.4836	-	-	-	-
50	previously not reported	HCN1	5:45864843:A:G	5	45864843	G	A	5:46194080:D:I	rs8188168	5	46194080	D	I	0.817095	intergenic_variant	MODIFIER	-	-	-	-	-	-	-	-	-	-	rs8188168	-	-	-	-	-	-	-	-	-	0.0666	0.0058	0	0	0	-	-	-	-
50	previously not reported	HCN1	5:45864843:A:G	5	45864843	G	A	5:46194159:C:T	rs8188010	5	46194159	C	T	0.810264	intergenic_variant	MODIFIER	-	-	-	-	-	-	-	-	-	-	rs8188010	-	-	-	-	-	-	-	-	-	-	-	-	-	-	-	-	-	-
50	previously not reported	HCN1	5:45864843:A:G	5	45864843	G	A	5:46195886:C:T	rs62370770	5	46195886	T	C	0.814806	intergenic_variant	MODIFIER	-	-	-	-	-	-	-	-	-	-	rs62370770	-	-	-	-	-	-	-	-	0.5218	0.6921	0.415	0.4792	0.4513	0.4836	-	-	-	-
50	previously not reported	HCN1	5:45864843:A:G	5	45864843	G	A	5:46196755:C:T	rs141175297	5	46196755	C	T	0.815399	intergenic_variant	MODIFIER	-	-	-	-	-	-	-	-	-	-	rs8188142	-	-	-	-	-	-	-	-	0.522	0.6921	0.4164	0.4792	0.4513	0.4836	-	-	-	-
50	previously not reported	HCN1	5:45864843:A:G	5	45864843	G	A	5:46198203:G:T	rs142198703	5	46198203	T	G	0.81467	intergenic_variant	MODIFIER	-	-	-	-	-	-	-	-	-	-	rs7293324	-	-	-	-	-	-	-	-	0.5222	0.6921	0.4179	0.4792	0.4513	0.4836	-	-	-	-
50	previously not reported	HCN1	5:45864843:A:G	5	45864843	G	A	5:46199438:A:G	rs61187820	5	46199438	A	G	0.821966	intergenic_variant	MODIFIER	-	-	-	-	-	-	-	-	-	-	rs61187820	-	-	-	-	-	-	-	-	0.5182	0.6884	0.4121	0.4802	0.4453	0.4775	-	-	-	-
50	previously not reported	HCN1	5:45864843:A:G	5	45864843	G	A	5:46201474:C:G	rs8188050	5	46201474	C	G	0.827726	intergenic_variant	MODIFIER	-	-	-	-	-	-	-	-	-	-	rs8188050	-	-	-	-	-	-	-	-	0.5188	0.6921	0.4107	0.4792	0.4453	0.4775	-	-	-	-
50	previously not reported	HCN1	5:45864843:A:G	5	45864843	G	A	5:46201958:A:G	rs13188786	5	46201958	A	G	0.827726	intergenic_variant	MODIFIER	-	-	-	-	-	-	-	-	-	-	rs13188786	-	-	-	-	-	-	-	-	0.5188	0.6921	0.4107	0.4792	0.4453	0.4775	-	-	-	-
50	previously not reported	HCN1	5:45864843:A:G	5	45864843	G	A	5:46202104:C:T	rs10064792	5	46202104	C	T	0.827726	intergenic_variant	MODIFIER	-	-	-	-	-	-	-	-	-	-	rs10064792	-	-	-	-	-	-	-	-	0.5188	0.6921	0.4107	0.4792	0.4453	0.4775	-	-	-	-
50	previously not reported	HCN1	5:45864843:A:G	5	45864843	G	A	5:46202280:G:T	rs10072776	5	46202280	T	G	0.827726	intergenic_variant	MODIFIER	-	-	-	-	-	-	-	-	-	-	rs10072776	-	-	-	-	-	-	-	-	0.5188	0.6921	0.4107	0.4792	0.4453	0.4775	-	-	-	-
50	previously not reported	HCN1	5:45864843:A:G	5	45864843	G	A	5:46202839:A:C	rs10941746	5	46202839	A	C	0.903691	intergenic_variant	MODIFIER	-	-	-	-	-	-	-	-	-	-	rs10941746	-	-	-	-	-	-	-	-	0.5383	0.7504	0.4193	0.4792	0.4493	0.4888	-	-	-	-
50	previously not reported	HCN1	5:45864843:A:G	5	45864843	G	A	5:46203497:G:T	rs7293337	5	46203497	T	G	0.817701	intergenic_variant	MODIFIER	-	-	-	-	-	-	-	-	-	-	rs7293337	-	-	-	-	-	-	-	-	0.5214	0.6921	0.4107	0.4792	0.4463	0.4898	-	-	-	-
50	previously not reported	HCN1	5:45864843:A:G	5	45864843	G	A	5:46205700:C:T	rs13168431	5	46205700	C	T	0.827726	intergenic_variant	MODIFIER	-	-	-	-	-	-	-	-	-	-	rs13168431	-	-	-	-	-	-	-	-	0.5188	0.6921	0.4107	0.4792	0.4453	0.4775	-	-	-	-
50	previously not reported	HCN1	5:45864843:A:G	5	45864843	G	A	5:46207079:A:G	rs7293317	5	46207079	A	G	0.819569	intergenic_variant	MODIFIER	-	-	-	-	-	-	-	-	-	-	rs7293317	-	-	-	-	-	-	-	-	0.5208	0.6914	0.4107	0.4792	0.4453	0.4888	-	-	-	-
50	previously not reported	HCN1	5:45864843:A:G	5	45864843	G	A	5:46210157:G:T	rs11960110	5	46210157	T	G	0.820271	intergenic_variant	MODIFIER	-	-	-	-	-	-	-	-	-	-	rs11960110	-	-	-	-	-	-	-	-	-	-	-	-	-	-	-	-	-	-
50	previously not reported	HCN1	5:45864843:A:G	5	45864843	G	A	5:46210588:C:T	rs13166566	5	46210588	C	T	0.827686	intergenic_variant	MODIFIER	-	-	-	-	-	-	-	-	-	-	rs13166566	-	-	-	-	-	-	-	-	0.5192	0.6929	0.4121	0.4792	0.4453	0.4775	-	-	-	-
50	previously not reported	HCN1	5:45864843:A:G	5	45864843	G	A	5:46211796:A:G	rs13172097	5	46211796	A	G	0.820271	intergenic_variant	MODIFIER	-	-	-	-	-	-	-	-	-	-	rs13172097	-	-	-	-	-	-	-	-	0.521	0.6921	0.4107	0.4792	0.4453	0.4888	-	-	-	-
50	previously not reported	HCN1	5:45864843:A:G	5	45864843	G	A	5:46214460:C:G	rs8185185	5	46214460	G	C	0.826459	intergenic_variant	MODIFIER	-	-	-	-	-	-	-	-	-	-	rs8185185	-	-	-	-	-	-	-	-	0.5192	0.6929	0.4107	0.4792	0.4453	0.4785	-	-	-	-
50	previously not reported	HCN1	5:45864843:A:G	5	45864843	G	A	5:46215658:G:T	rs8188054	5	46215658	T	G	0.815711	intergenic_variant	MODIFIER	-	-	-	-	-	-	-	-	-	-	rs8188054	-	-	-	-	-	-	-	-	0.516	0.6808	0.4107	0.4802	0.4453	0.4775	-	-	-	-
50	previously not reported	HCN1	5:45864843:A:G	5	45864843	G	A	5:46217933:A:C	rs10061101	5	46217933	A	C	0.816455	intergenic_variant	MODIFIER	-	-	-	-	-	-	-	-	-	-	rs10061101	-	-	-	-	-	-	-	-	0.5158	0.6808	0.4107	0.4792	0.4453	0.4775	-	-	-	-
50	previously not reported	HCN1	5:45864843:A:G	5	45864843	G	A	5:46222050:C:T	rs8188296	5	46222050	T	C	0.817973	intergenic_variant	MODIFIER	-	-	-	-	-	-	-	-	-	-	rs8188296	-	-	-	-	-	-	-	-	0.5174	0.6853	0.4121	0.4792	0.4433	0.4806	-	-	-	-
50	previously not reported	HCN1	5:45864843:A:G	5	45864843	G	A	5:46222057:D:I	rs35251267	5	46222057	I	A	0.89132	intergenic_variant	MODIFIER	-	-	-	-	-	-	-	-	-	-	rs35251267	-	-	-	-	-	-	-	-	0.5405	0.7504	0.4236	0.4821	0.4503	0.4928	-	-	-	-
50	previously not reported	HCN1	5:45864843:A:G	5	45864843	G	A	5:46222068:A:G	rs34186279	5	46222068	A	G	0.89132	intergenic_variant	MODIFIER	-	-	-	-	-	-	-	-	-	-	rs34186279	-	-	-	-	-	-	-	-	0.5405	0.7504	0.4236	0.4821	0.4503	0.4928	-	-	-	-
50	previously not reported	HCN1	5:45864843:A:G	5	45864843	G	A	5:46222931:C:T	rs10064681	5	46222931	T	C	0.827237	intergenic_variant	MODIFIER	-	-	-	-	-	-	-	-	-	-	rs10064681	-	-	-	-	-	-	-	-	0.5186	0.6929	0.4107	0.4792	0.4433	0.4775	-	-	-	-
50	previously not reported	HCN1	5:45864843:A:G	5	45864843	G	A	5:46223069:A:G	rs12109835	5	46223069	A	G	0.827237	intergenic_variant	MODIFIER	-	-	-	-	-	-	-	-	-	-	rs12109835	-	-	-	-	-	-	-	-	0.5186	0.6929	0.4107	0.4792	0.4433	0.4775	-	-	-	-
50	previously not reported	HCN1	5:45864843:A:G	5	45864843	G	A	5:46225843:D:I	rs34222484	5	46225843	I	T	0.827237	intergenic_variant	MODIFIER	-	-	-	-	-	-	-	-	-	-	rs34222484	-	-	-	-	-	-	-	-	0.5186	0.6929	0.4107	0.4792	0.4433	0.4775	-	-	-	-
50	previously not reported	HCN1	5:45864843:A:G	5	45864843	G	A	5:46235298:A:G	rs10056067	5	46235298	A	G	0.817329	intergenic_variant	MODIFIER	-	-	-	-	-	-	-	-	-	-	rs10056067	-	-	-	-	-	-	-	-	0.5152	0.6793	0.4092	0.4792	0.4453	0.4775	-	-	-	-
50	previously not reported	HCN1	5:45864843:A:G	5	45864843	G	A	5:46235926:A:C	rs12697543	5	46235926	A	C	0.826332	intergenic_variant	MODIFIER	-	-	-	-	-	-	-	-	-	-	rs12697543	-	-	-	-	-	-	-	-	0.5184	0.6914	0.4107	0.4782	0.4453	0.4775	-	-	-	-
50	previously not reported	HCN1	5:45864843:A:G	5	45864843	G	A	5:46247000:C:T	rs8188098	5	46247000	T	C	0.823032	intergenic_variant	MODIFIER	-	-	-	-	-	-	-	-	-	-	rs8188098	-	-	-	-	-	-	-	-	0.5595	0.7519	0.4193	0.5833	0.4463	0.4908	-	-	-	-
50	previously not reported	HCN1	5:45864843:A:G	5	45864843	G	A	5:46250094:A:T	rs8185287	5	46250094	T	A	0.828452	intergenic_variant	MODIFIER	-	-	-	-	-	-	-	-	-	-	rs8185287	-	-	-	-	-	-	-	-	0.5198	0.6967	0.4107	0.4802	0.4433	0.4775	-	-	-	-
50	previously not reported	HCN1	5:45864843:A:G	5	45864843	G	A	5:46263438:C:T	rs8185255	5	46263438	C	T	0.905253	intergenic_variant	MODIFIER	-	-	-	-	-	-	-	-	-	-	rs8185255	-	-	-	-	-	-	-	-	0.4613	0.2481	0.5807	0.5208	0.5507	0.5112	-	-	-	-
50	previously not reported	HCN1	5:45864843:A:G	5	45864843	G	A	5:46265302:A:G	rs4975957	5	46265302	A	G	0.819929	intergenic_variant	MODIFIER	-	-	-	-	-	-	-	-	-	-	rs4975957	-	-	-	-	-	-	-	-	0.4828	0.3079	0.5908	0.5278	0.5547	0.5225	-	-	-	-
50	previously not reported	HCN1	5:45864843:A:G	5	45864843	G	A	5:46266964:A:G	rs10941759	5	46266964	G	A	0.823839	intergenic_variant	MODIFIER	-	-	-	-	-	-	-	-	-	-	rs10941759	-	-	-	-	-	-	-	-	0.4812	0.3041	0.5908	0.5238	0.5557	0.5225	-	-	-	-
50	previously not reported	HCN1	5:45864843:A:G	5	45864843	G	A	5:46267462:C:T	rs10941760	5	46267462	C	T	0.827225	intergenic_variant	MODIFIER	-	-	-	-	-	-	-	-	-	-	rs10941760	-	-	-	-	-	-	-	-	0.4802	0.3011	0.5908	0.5238	0.5547	0.5225	-	-	-	-
50	previously not reported	HCN1	5:45864843:A:G	5	45864843	G	A	5:46278786:D:I	rs74468978	5	46278786	I	A	0.817456	intergenic_variant	MODIFIER	-	-	-	-	-	-	-	-	-	-	rs74468978	-	-	-	-	-	-	-	-	0.4762	0.292	0.5893	0.5208	0.5527	0.5204	-	-	-	-
50	previously not reported	HCN1	5:45864843:A:G	5	45864843	G	A	5:46290389:A:G	rs4975965	5	46290389	A	G	0.824985	intergenic_variant	MODIFIER	-	-	-	-	-	-	-	-	-	-	rs4975965	-	-	-	-	-	-	-	-	0.4804	0.3064	0.5879	0.5188	0.5557	0.5225	-	-	-	-
50	previously not reported	HCN1	5:45864843:A:G	5	45864843	G	A	5:46292277:C:T	rs10054134	5	46292277	C	T	0.899268	intergenic_variant	MODIFIER	-	-	-	-	-	-	-	-	-	-	rs10054134	-	-	-	-	-	-	-	-	0.4603	0.2458	0.5793	0.5179	0.5527	0.5112	-	-	-	-
50	previously not reported	HCN1	5:45864843:A:G	5	45864843	G	A	5:46295605:A:G	rs8188077	5	46295605	A	G	0.825896	intergenic_variant	MODIFIER	-	-	-	-	-	-	-	-	-	-	rs8188077	-	-	-	-	-	-	-	-	0.4802	0.3064	0.5879	0.5179	0.5557	0.5225	-	-	-	-
50	previously not reported	HCN1	5:45864843:A:G	5	45864843	G	A	5:46296285:C:T	rs80150384	5	46296285	C	T	0.823389	intergenic_variant	MODIFIER	-	-	-	-	-	-	-	-	-	-	rs80150384	-	-	-	-	-	-	-	-	0.4794	0.3056	0.5879	0.5149	0.5557	0.5225	-	-	-	-
50	previously not reported	HCN1	5:45864843:A:G	5	45864843	G	A	5:46302781:A:G	rs9717195	5	46302781	A	G	0.82317	intergenic_variant	MODIFIER	-	-	-	-	-	-	-	-	-	-	rs9717195	-	-	-	-	-	-	-	-	0.4806	0.3064	0.5893	0.5198	0.5547	0.5225	-	-	-	-
50	previously not reported	HCN1	5:45864843:A:G	5	45864843	G	A	5:46305202:D:I	rs139490823	5	46305202	I	C	0.824532	intergenic_variant	MODIFIER	-	-	-	-	-	-	-	-	-	-	rs139490823	-	-	-	-	-	-	-	-	0.4798	0.3026	0.5908	0.5198	0.5547	0.5225	-	-	-	-
50	previously not reported	HCN1	5:45864843:A:G	5	45864843	G	A	5:46322174:A:G	rs150699607	5	46322174	A	G	0.822184	intergenic_variant	MODIFIER	-	-	-	-	-	-	-	-	-	-	rs150699607	-	-	-	-	-	-	-	-	0.4818	0.3086	0.5893	0.5188	0.5577	0.5235	-	-	-	-
50	previously not reported	HCN1	5:45864843:A:G	5	45864843	G	A	5:46323133:A:G	rs11950489	5	46323133	G	A	0.89668	intergenic_variant	MODIFIER	-	-	-	-	-	-	-	-	-	-	rs11950489	-	-	-	-	-	-	-	-	0.4625	0.2519	0.5807	0.5188	0.5527	0.5123	-	-	-	-
50	previously not reported	HCN1	5:45864843:A:G	5	45864843	G	A	5:46323523:A:G	rs75563590	5	46323523	A	G	0.823946	intergenic_variant	MODIFIER	-	-	-	-	-	-	-	-	-	-	rs75563590	-	-	-	-	-	-	-	-	0.4812	0.3086	0.5893	0.5188	0.5547	0.5235	-	-	-	-
50	previously not reported	HCN1	5:45864843:A:G	5	45864843	G	A	5:46325385:A:C	rs8175383	5	46325385	A	C	0.822553	intergenic_variant	MODIFIER	-	-	-	-	-	-	-	-	-	-	rs8175383	-	-	-	-	-	-	-	-	0.4816	0.3094	0.5908	0.5188	0.5547	0.5235	-	-	-	-
50	previously not reported	HCN1	5:45864843:A:G	5	45864843	G	A	5:46339544:C:T	rs8185178	5	46339544	C	T	0.812838	intergenic_variant	MODIFIER	-	-	-	-	-	-	-	-	-	-	rs8185178	-	-	-	-	-	-	-	-	0.4838	0.3185	0.5908	0.5179	0.5547	0.5235	-	-	-	-
50	previously not reported	HCN1	5:45864843:A:G	5	45864843	G	A	5:46339658:A:G	rs8185186	5	46339658	G	A	0.822579	intergenic_variant	MODIFIER	-	-	-	-	-	-	-	-	-	-	rs8185186	-	-	-	-	-	-	-	-	0.4808	0.3079	0.5893	0.5179	0.5547	0.5235	-	-	-	-
50	previously not reported	HCN1	5:45864843:A:G	5	45864843	G	A	5:46340344:C:G	rs10070024	5	46340344	C	G	0.89486	intergenic_variant	MODIFIER	-	-	-	-	-	-	-	-	-	-	rs10070024	-	-	-	-	-	-	-	-	0.4611	0.2474	0.5807	0.5179	0.5527	0.5123	-	-	-	-
50	previously not reported	HCN1	5:45864843:A:G	5	45864843	G	A	5:46341898:A:G	rs10462113	5	46341898	G	A	0.820776	intergenic_variant	MODIFIER	-	-	-	-	-	-	-	-	-	-	rs10462113	-	-	-	-	-	-	-	-	0.481	0.3094	0.5893	0.5179	0.5547	0.5225	-	-	-	-
50	previously not reported	HCN1	5:45864843:A:G	5	45864843	G	A	5:46346073:A:G	rs6882540	5	46346073	G	A	0.817547	intergenic_variant	MODIFIER	-	-	-	-	-	-	-	-	-	-	rs6882540	-	-	-	-	-	-	-	-	0.4812	0.3064	0.5893	0.5188	0.5577	0.5235	-	-	-	-
50	previously not reported	HCN1	5:45864843:A:G	5	45864843	G	A	5:46346216:C:T	rs12652297	5	46346216	C	T	0.820276	intergenic_variant	MODIFIER	-	-	-	-	-	-	-	-	-	-	rs12652297	-	-	-	-	-	-	-	-	0.482	0.3086	0.5893	0.5188	0.5577	0.5245	-	-	-	-
50	previously not reported	HCN1	5:45864843:A:G	5	45864843	G	A	5:46346867:A:T	rs12517055	5	46346867	T	A	0.820276	intergenic_variant	MODIFIER	-	-	-	-	-	-	-	-	-	-	rs12517055	-	-	-	-	-	-	-	-	0.482	0.3086	0.5893	0.5188	0.5577	0.5245	-	-	-	-
50	previously not reported	HCN1	5:45864843:A:G	5	45864843	G	A	5:46346961:A:G	rs10941802	5	46346961	G	A	0.824958	intergenic_variant	MODIFIER	-	-	-	-	-	-	-	-	-	-	rs10941802	-	-	-	-	-	-	-	-	0.4788	0.2995	0.5893	0.5169	0.5557	0.5245	-	-	-	-
50	previously not reported	HCN1	5:45864843:A:G	5	45864843	G	A	5:46347213:D:I	rs112215619	5	46347213	D	I	0.822541	intergenic_variant	MODIFIER	-	-	-	-	-	-	-	-	-	-	rs112215619	-	-	-	-	-	-	-	-	0.4804	0.3064	0.5893	0.5188	0.5547	0.5225	-	-	-	-
50	previously not reported	HCN1	5:45864843:A:G	5	45864843	G	A	5:46347215:C:G	rs199602276	5	46347215	G	C	0.822541	intergenic_variant	MODIFIER	-	-	-	-	-	-	-	-	-	-	rs199602276	-	-	-	-	-	-	-	-	0.4804	0.3064	0.5893	0.5188	0.5547	0.5225	-	-	-	-
50	previously not reported	HCN1	5:45864843:A:G	5	45864843	G	A	5:46347216:C:G	rs200778473	5	46347216	G	C	0.822541	intergenic_variant	MODIFIER	-	-	-	-	-	-	-	-	-	-	rs200778473	-	-	-	-	-	-	-	-	0.4804	0.3064	0.5893	0.5188	0.5547	0.5225	-	-	-	-
50	previously not reported	HCN1	5:45864843:A:G	5	45864843	G	A	5:46349704:C:T	rs13358908	5	46349704	C	T	0.807566	intergenic_variant	MODIFIER	-	-	-	-	-	-	-	-	-	-	rs13358908	-	-	-	-	-	-	-	-	-	-	-	-	-	-	-	-	1	26198764
50	previously not reported	HCN1	5:45864843:A:G	5	45864843	G	A	5:46353859:C:T	rs12652727	5	46353859	T	C	0.81511	intergenic_variant	MODIFIER	-	-	-	-	-	-	-	-	-	-	rs12652727	-	-	-	-	-	-	-	-	0.482	0.3101	0.5893	0.5188	0.5586	0.5215	-	-	-	-
50	previously not reported	HCN1	5:45864843:A:G	5	45864843	G	A	5:46361167:A:G	rs10051501	5	46361167	G	A	0.818066	intergenic_variant	MODIFIER	-	-	-	-	-	-	-	-	-	-	rs10051501	-	-	-	-	-	-	-	-	0.479	0.3026	0.5893	0.5159	0.5577	0.5204	-	-	-	-
50	previously not reported	HCN1	5:45864843:A:G	5	45864843	G	A	5:46364905:A:C	rs4975935	5	46364905	C	A	0.817279	intergenic_variant	MODIFIER	-	-	-	-	-	-	-	-	-	-	rs4975935	-	-	-	-	-	-	-	-	0.478	0.3026	0.5893	0.5179	0.5547	0.5164	-	-	-	-
50	previously not reported	HCN1	5:45864843:A:G	5	45864843	G	A	5:46369985:C:G	rs8185191	5	46369985	G	C	0.819155	intergenic_variant	MODIFIER	-	-	-	-	-	-	-	-	-	-	rs8185191	-	-	-	-	-	-	-	-	0.4802	0.3064	0.5908	0.5159	0.5547	0.5235	-	-	-	-
50	previously not reported	HCN1	5:45864843:A:G	5	45864843	G	A	5:46370123:A:T	rs61351693	5	46370123	A	T	0.818544	intergenic_variant	MODIFIER	-	-	-	-	-	-	-	-	-	-	rs61351693	-	-	-	-	-	-	-	-	0.4788	0.3033	0.5893	0.5159	0.5537	0.5225	-	-	-	-
50	previously not reported	HCN1	5:45864843:A:G	5	45864843	G	A	5:46371935:A:C	rs4975942	5	46371935	C	A	0.821955	intergenic_variant	MODIFIER	-	-	-	-	-	-	-	-	-	-	rs4975942	-	-	-	-	-	-	-	-	0.4794	0.3064	0.5893	0.5149	0.5527	0.5235	-	-	-	-
50	previously not reported	HCN1	5:45864843:A:G	5	45864843	G	A	5:46372380:C:G	rs8188255	5	46372380	G	C	0.819781	intergenic_variant	MODIFIER	-	-	-	-	-	-	-	-	-	-	rs8188255	-	-	-	-	-	-	-	-	-	-	-	-	-	-	-	-	-	-
50	previously not reported	HCN1	5:45864843:A:G	5	45864843	G	A	5:46372460:D:I	rs35170456	5	46372460	D	I	0.81912	intergenic_variant	MODIFIER	-	-	-	-	-	-	-	-	-	-	rs35170456	-	-	-	-	-	-	-	-	0.4798	0.3064	0.5908	0.5149	0.5547	0.5225	-	-	-	-
50	previously not reported	HCN1	5:45864843:A:G	5	45864843	G	A	5:46372462:A:C	rs34899679	5	46372462	C	A	0.81912	intergenic_variant	MODIFIER	-	-	-	-	-	-	-	-	-	-	rs34899679	-	-	-	-	-	-	-	-	0.4798	0.3064	0.5908	0.5149	0.5547	0.5225	-	-	-	-
50	previously not reported	HCN1	5:45864843:A:G	5	45864843	G	A	5:46372466:A:G	rs35088345	5	46372466	G	A	0.819265	intergenic_variant	MODIFIER	-	-	-	-	-	-	-	-	-	-	rs35088345	-	-	-	-	-	-	-	-	0.4802	0.3071	0.5908	0.5149	0.5547	0.5235	-	-	-	-
50	previously not reported	HCN1	5:45864843:A:G	5	45864843	G	A	5:46373369:A:G	rs12518698	5	46373369	G	A	0.817842	intergenic_variant	MODIFIER	-	-	-	-	-	-	-	-	-	-	rs12518698	-	-	-	-	-	-	-	-	0.479	0.3026	0.5908	0.5149	0.5547	0.5235	-	-	-	-
50	previously not reported	HCN1	5:45864843:A:G	5	45864843	G	A	5:46373712:A:C	rs7293442	5	46373712	C	A	0.818496	intergenic_variant	MODIFIER	-	-	-	-	-	-	-	-	-	-	rs7293442	-	-	-	-	-	-	-	-	0.4796	0.3064	0.5908	0.5149	0.5547	0.5215	-	-	-	-
50	previously not reported	HCN1	5:45864843:A:G	5	45864843	G	A	5:46375239:A:C	rs77797625	5	46375239	A	C	0.820626	intergenic_variant	MODIFIER	-	-	-	-	-	-	-	-	-	-	rs77797625	-	-	-	-	-	-	-	-	0.4806	0.3064	0.5922	0.5149	0.5567	0.5235	-	-	-	-
50	previously not reported	HCN1	5:45864843:A:G	5	45864843	G	A	5:46375637:C:G	rs140637026	5	46375637	C	G	0.815413	intergenic_variant	MODIFIER	-	-	-	-	-	-	-	-	-	-	rs140637026	-	-	-	-	-	-	-	-	0.4802	0.3056	0.5908	0.5149	0.5567	0.5235	-	-	-	-
50	previously not reported	HCN1	5:45864843:A:G	5	45864843	G	A	5:46376312:C:T	rs28816502	5	46376312	C	T	0.817244	intergenic_variant	MODIFIER	-	-	-	-	-	-	-	-	-	-	rs28816502	-	-	-	-	-	-	-	-	0.4804	0.3086	0.5908	0.5139	0.5547	0.5235	-	-	-	-
50	previously not reported	HCN1	5:45864843:A:G	5	45864843	G	A	5:46378660:A:G	rs28873151	5	46378660	G	A	0.818607	intergenic_variant	MODIFIER	-	-	-	-	-	-	-	-	-	-	rs28873151	-	-	-	-	-	-	-	-	0.4796	0.3033	0.5908	0.5149	0.5567	0.5235	-	-	-	-
50	previously not reported	HCN1	5:45864843:A:G	5	45864843	G	A	5:46378931:A:T	rs28847123	5	46378931	T	A	0.817319	intergenic_variant	MODIFIER	-	-	-	-	-	-	-	-	-	-	rs28847123	-	-	-	-	-	-	-	-	0.48	0.3048	0.5908	0.5149	0.5567	0.5235	-	-	-	-
50	previously not reported	HCN1	5:45864843:A:G	5	45864843	G	A	5:46378957:G:T	rs28855077	5	46378957	T	G	0.817319	intergenic_variant	MODIFIER	-	-	-	-	-	-	-	-	-	-	rs28855077	-	-	-	-	-	-	-	-	0.48	0.3048	0.5908	0.5149	0.5567	0.5235	-	-	-	-
50	previously not reported	HCN1	5:45864843:A:G	5	45864843	G	A	5:46382426:A:G	rs8185324	5	46382426	G	A	0.818605	intergenic_variant	MODIFIER	-	-	-	-	-	-	-	-	-	-	rs8185324	-	-	-	-	-	-	-	-	0.4808	0.3079	0.5908	0.5159	0.5567	0.5225	-	-	-	-
50	previously not reported	HCN1	5:45864843:A:G	5	45864843	G	A	5:46383335:G:T	rs10053628	5	46383335	T	G	0.81989	intergenic_variant	MODIFIER	-	-	-	-	-	-	-	-	-	-	rs10053628	-	-	-	-	-	-	-	-	0.4804	0.3064	0.5908	0.5159	0.5567	0.5225	-	-	-	-
50	previously not reported	HCN1	5:45864843:A:G	5	45864843	G	A	5:46384005:A:G	rs4975947	5	46384005	G	A	0.818534	intergenic_variant	MODIFIER	-	-	-	-	-	-	-	-	-	-	rs4975947	-	-	-	-	-	-	-	-	0.4812	0.3079	0.5908	0.5159	0.5557	0.5256	-	-	-	-
50	previously not reported	HCN1	5:45864843:A:G	5	45864843	G	A	5:46385261:A:T	rs12518343	5	46385261	A	T	0.815819	intergenic_variant	MODIFIER	-	-	-	-	-	-	-	-	-	-	rs12518343	-	-	-	-	-	-	-	-	-	-	-	-	-	-	-	-	-	-
50	previously not reported	HCN1	5:45864843:A:G	5	45864843	G	A	5:46386229:D:I	rs8185220	5	46386229	D	I	0.812024	intergenic_variant	MODIFIER	-	-	-	-	-	-	-	-	-	-	rs8185220	-	-	-	-	-	-	-	-	0.4792	0.3026	0.5908	0.5169	0.5537	0.5235	-	-	-	-
50	previously not reported	HCN1	5:45864843:A:G	5	45864843	G	A	5:46387533:A:G	rs141415449	5	46387533	G	A	0.821253	intergenic_variant	MODIFIER	-	-	-	-	-	-	-	-	-	-	rs8188243	-	-	-	-	-	-	-	-	0.4808	0.3064	0.5908	0.5159	0.5577	0.5235	-	-	-	-
50	previously not reported	HCN1	5:45864843:A:G	5	45864843	G	A	5:46387640:A:T	rs139431167	5	46387640	T	A	0.818753	intergenic_variant	MODIFIER	-	-	-	-	-	-	-	-	-	-	rs139431167	-	-	-	-	-	-	-	-	0.48	0.3033	0.5908	0.5159	0.5567	0.5245	-	-	-	-
50	previously not reported	HCN1	5:45864843:A:G	5	45864843	G	A	5:46388844:C:G	rs113006093	5	46388844	G	C	0.821843	intergenic_variant	MODIFIER	-	-	-	-	-	-	-	-	-	-	rs4975951	-	-	-	-	-	-	-	-	-	0.3064	0.5908	0.5159	0.5567	0.5235	-	-	-	-
50	previously not reported	HCN1	5:45864843:A:G	5	45864843	G	A	5:46389368:A:G	rs12522625	5	46389368	G	A	0.821843	intergenic_variant	MODIFIER	-	-	-	-	-	-	-	-	-	-	rs12522625	-	-	-	-	-	-	-	-	0.4806	0.3064	0.5908	0.5159	0.5567	0.5235	-	-	-	-
50	previously not reported	HCN1	5:45864843:A:G	5	45864843	G	A	5:46389583:C:T	rs10941823	5	46389583	C	T	0.821843	intergenic_variant	MODIFIER	-	-	-	-	-	-	-	-	-	-	rs10941823	-	-	-	-	-	-	-	-	0.4806	0.3064	0.5908	0.5159	0.5567	0.5235	-	-	-	-
50	previously not reported	HCN1	5:45864843:A:G	5	45864843	G	A	5:46390973:A:G	rs8185088	5	46390973	G	A	0.821253	intergenic_variant	MODIFIER	-	-	-	-	-	-	-	-	-	-	rs8185088	-	-	-	-	-	-	-	-	0.4808	0.3064	0.5908	0.5159	0.5567	0.5245	-	-	-	-
50	previously not reported	HCN1	5:45864843:A:G	5	45864843	G	A	5:46392210:C:T	rs12652570	5	46392210	C	T	0.821815	intergenic_variant	MODIFIER	-	-	-	-	-	-	-	-	-	-	rs12652570	-	-	-	-	-	-	-	-	0.479	0.3003	0.5908	0.5159	0.5567	0.5235	-	-	-	-
50	previously not reported	HCN1	5:45864843:A:G	5	45864843	G	A	5:46392306:C:T	rs142355706	5	46392306	C	T	0.81853	intergenic_variant	MODIFIER	-	-	-	-	-	-	-	-	-	-	rs142355706	-	-	-	-	-	-	-	-	-	-	-	-	-	-	-	-	-	-
50	previously not reported	HCN1	5:45864843:A:G	5	45864843	G	A	5:46392440:C:T	rs12652607	5	46392440	C	T	0.821253	intergenic_variant	MODIFIER	-	-	-	-	-	-	-	-	-	-	rs12652607	-	-	-	-	-	-	-	-	0.4808	0.3064	0.5908	0.5159	0.5567	0.5245	-	-	-	-
50	previously not reported	HCN1	5:45864843:A:G	5	45864843	G	A	5:46394116:C:G	rs8185366	5	46394116	G	C	0.892994	intergenic_variant	MODIFIER	-	-	-	-	-	-	-	-	-	-	rs8185366	-	-	-	-	-	-	-	-	0.4601	0.2436	0.5821	0.5159	0.5537	0.5123	-	-	-	-
50	previously not reported	HCN1	5:45864843:A:G	5	45864843	G	A	5:46403741:D:I	rs113321683	5	46403741	D	I	0.819928	intergenic_variant	MODIFIER	-	-	-	-	-	-	-	-	-	-	rs113321683	-	-	-	-	-	-	-	-	0.4808	0.3079	0.5893	0.5159	0.5567	0.5235	-	-	-	-
51	previously not reported	NR2F1	5:92455655:A:G	5	92455655	A	G	5:92439320:A:G	rs1496332	5	92439320	A	G	0.989782	intergenic_variant	MODIFIER	-	-	-	-	-	-	-	-	-	-	rs1496332	-	-	-	-	-	-	-	-	0.616	0.7315	0.6297	0.6895	0.4543	0.5409	-	-	-	-
51	previously not reported	NR2F1	5:92455655:A:G	5	92455655	A	G	5:92445784:G:T	rs1496331	5	92445784	G	T	0.905827	intergenic_variant	MODIFIER	-	-	-	-	-	-	-	-	-	-	rs1496331	-	-	-	-	-	-	-	-	-	-	-	-	-	-	-	-	-	-
51	previously not reported	NR2F1	5:92455655:A:G	5	92455655	A	G	5:92450649:A:G	rs959922	5	92450649	A	G	0.991357	intergenic_variant	MODIFIER	-	-	-	-	-	-	-	-	-	-	rs959922	-	-	-	-	-	-	-	-	0.6164	0.7322	0.6311	0.6895	0.4543	0.5409	-	-	-	20306291
51	previously not reported	NR2F1	5:92455655:A:G	5	92455655	A	G	5:92451777:A:G	rs6880789	5	92451777	A	G	0.991357	intergenic_variant	MODIFIER	-	-	-	-	-	-	-	-	-	-	rs6880789	-	-	-	-	-	-	-	-	0.6164	0.7322	0.6311	0.6895	0.4543	0.5409	-	-	-	-
51	previously not reported	NR2F1	5:92455655:A:G	5	92455655	A	G	5:92452676:A:C	rs995620	5	92452676	A	C	0.99057	intergenic_variant	MODIFIER	-	-	-	-	-	-	-	-	-	-	rs995620	-	-	-	-	-	-	-	-	0.6166	0.733	0.6311	0.6895	0.4543	0.5409	-	-	-	-
51	previously not reported	NR2F1	5:92455655:A:G	5	92455655	A	G	5:92452779:D:I	rs5869600	5	92452779	D	I	0.988994	intergenic_variant	MODIFIER	-	-	-	-	-	-	-	-	-	-	rs5869600	-	-	-	-	-	-	-	-	0.6162	0.7315	0.6311	0.6895	0.4543	0.5409	-	-	-	-
51	previously not reported	NR2F1	5:92455655:A:G	5	92455655	A	G	5:92454197:D:I	rs148081655	5	92454197	I	C	0.847961	intergenic_variant	MODIFIER	-	-	-	-	-	-	-	-	-	-	rs148081655	-	-	-	-	-	-	-	-	0.5767	0.6914	0.5908	0.6339	0.4324	0.501	-	-	-	-
51	previously not reported	NR2F1	5:92455655:A:G	5	92455655	A	G	5:92455655:A:G	rs4869412	5	92455655	A	G	1	intergenic_variant	MODIFIER	-	-	-	-	-	-	-	-	-	-	rs4869412	-	-	-	-	-	-	-	-	0.6158	0.7277	0.6311	0.6925	0.4543	0.5409	-	-	-	-
51	previously not reported	NR2F1	5:92455655:A:G	5	92455655	A	G	5:92460541:C:T	rs4470752	5	92460541	C	T	0.992154	intergenic_variant	MODIFIER	-	-	-	-	-	-	-	-	-	-	rs4470752	-	-	-	-	-	-	-	-	0.6158	0.7315	0.6254	0.6925	0.4543	0.5399	-	-	-	-
51	previously not reported	NR2F1	5:92455655:A:G	5	92455655	A	G	5:92461247:A:T	rs7711868	5	92461247	T	A	0.992154	intergenic_variant	MODIFIER	-	-	-	-	-	-	-	-	-	-	rs7711868	-	-	-	-	-	-	-	-	0.6158	0.7315	0.6254	0.6925	0.4543	0.5399	-	-	-	-
51	previously not reported	NR2F1	5:92455655:A:G	5	92455655	A	G	5:92464416:C:T	rs12519773	5	92464416	T	C	0.979	intergenic_variant	MODIFIER	-	-	-	-	-	-	-	-	-	-	rs12519773	-	-	-	-	-	-	-	-	0.6124	0.7315	0.6254	0.6786	0.4543	0.5368	-	-	1	23793025
51	previously not reported	NR2F1	5:92455655:A:G	5	92455655	A	G	5:92473445:A:G	rs77256862	5	92473445	G	A	0.982727	intergenic_variant	MODIFIER	-	-	-	-	-	-	-	-	-	-	rs77256862	-	-	-	-	-	-	-	-	0.615	0.7292	0.6254	0.6905	0.4553	0.5399	-	-	-	-
51	previously not reported	NR2F1	5:92455655:A:G	5	92455655	A	G	5:92474485:A:G	rs4343824	5	92474485	G	A	0.988231	intergenic_variant	MODIFIER	-	-	-	-	-	-	-	-	-	-	rs4343824	-	-	-	-	-	-	-	-	0.6164	0.733	0.6254	0.6925	0.4553	0.5399	-	-	-	-
51	previously not reported	NR2F1	5:92455655:A:G	5	92455655	A	G	5:92474980:C:T	rs4358503	5	92474980	C	T	0.985885	intergenic_variant	MODIFIER	-	-	-	-	-	-	-	-	-	-	rs4358503	-	-	-	-	-	-	-	-	0.6158	0.733	0.6254	0.6895	0.4553	0.5399	-	-	-	-
51	previously not reported	NR2F1	5:92455655:A:G	5	92455655	A	G	5:92482226:A:G	rs4242239	5	92482226	A	G	0.937611	intergenic_variant	MODIFIER	-	-	-	-	-	-	-	-	-	-	rs4242239	-	-	-	-	-	-	-	-	0.6024	0.6876	0.6225	0.6855	0.4533	0.5409	-	-	-	-
51	previously not reported	NR2F1	5:92455655:A:G	5	92455655	A	G	5:92488009:A:G	rs67779882	5	92488009	A	G	0.897134	intergenic_variant	MODIFIER	-	-	-	-	-	-	-	-	-	-	rs67779882	-	-	-	-	-	-	-	-	0.6102	0.7277	0.6138	0.6964	0.4414	0.5337	-	-	-	-
51	previously not reported	NR2F1	5:92455655:A:G	5	92455655	A	G	5:92488062:A:G	rs66496757	5	92488062	A	G	0.897134	intergenic_variant	MODIFIER	-	-	-	-	-	-	-	-	-	-	rs66496757	-	-	-	-	-	-	-	-	0.6102	0.7277	0.6138	0.6964	0.4414	0.5337	-	-	-	-
51	previously not reported	NR2F1	5:92455655:A:G	5	92455655	A	G	5:92490864:A:C	rs6873704	5	92490864	A	C	0.89564	intergenic_variant	MODIFIER	-	-	-	-	-	-	-	-	-	-	rs6873704	-	-	-	-	-	-	-	-	0.6098	0.7262	0.6138	0.6964	0.4414	0.5337	-	-	-	-
51	previously not reported	NR2F1	5:92455655:A:G	5	92455655	A	G	5:92491481:A:T	rs6883741	5	92491481	T	A	0.896387	intergenic_variant	MODIFIER	-	-	-	-	-	-	-	-	-	-	rs6883741	-	-	-	-	-	-	-	-	0.61	0.7269	0.6138	0.6964	0.4414	0.5337	-	-	-	-
51	previously not reported	NR2F1	5:92455655:A:G	5	92455655	A	G	5:92493318:C:T	rs6557063	5	92493318	T	C	0.89271	intergenic_variant	MODIFIER	-	-	-	-	-	-	-	-	-	-	rs6557063	-	-	-	-	-	-	-	-	0.6102	0.7284	0.6138	0.6954	0.4414	0.5337	-	-	-	-
52	previously not reported*	FER	5:108210304:A:G	5	108210304	A	G	5:108093529:A:C	rs10477931	5	108093529	A	C	0.859332	intron_variant	MODIFIER	FER	ENSG00000151422	protein_coding	-	1/19	-	-	-	-	-	rs10477931	-	1	Ensembl	-	-	-	-	-	0.2404	0.4266	0.1988	0.0556	0.2445	0.2045	-	-	-	-
52	previously not reported*	FER	5:108210304:A:G	5	108210304	A	G	5:108105903:C:T	rs10477932	5	108105903	T	C	0.944058	intron_variant	MODIFIER	FER	ENSG00000151422	protein_coding	-	2/19	-	-	-	-	-	rs10477932	-	1	Ensembl	-	-	-	-	-	0.2438	0.4312	0.1974	0.0903	0.2276	0.1984	-	-	-	-
52	previously not reported*	FER	5:108210304:A:G	5	108210304	A	G	5:108106624:D:I	rs57266248	5	108106624	D	I	0.944058	intron_variant	MODIFIER	FER	ENSG00000151422	protein_coding	-	2/19	-	-	-	-	-	rs57266248	-	1	Ensembl	-	-	-	-	-	0.243	0.4281	0.1974	0.0903	0.2276	0.1984	-	-	-	-
52	previously not reported*	FER	5:108210304:A:G	5	108210304	A	G	5:108106866:A:C	rs10075620	5	108106866	C	A	0.944058	intron_variant	MODIFIER	FER	ENSG00000151422	protein_coding	-	2/19	-	-	-	-	-	rs10075620	-	1	Ensembl	-	-	-	-	-	0.2364	0.4054	0.196	0.0883	0.2276	0.1984	-	-	-	-
52	previously not reported*	FER	5:108210304:A:G	5	108210304	A	G	5:108107752:G:T	rs10477933	5	108107752	T	G	0.927984	intron_variant	MODIFIER	FER	ENSG00000151422	protein_coding	-	2/19	-	-	-	-	-	rs10477933	-	1	Ensembl	-	-	-	-	-	0.2448	0.4312	0.1988	0.0913	0.2306	0.1984	-	-	-	21044948
52	previously not reported*	FER	5:108210304:A:G	5	108210304	A	G	5:108108500:A:G	rs3805599	5	108108500	A	G	0.960159	intron_variant	MODIFIER	FER	ENSG00000151422	protein_coding	-	2/19	-	-	-	-	-	rs3805599	-	1	Ensembl	-	-	-	-	-	0.2312	0.388	0.1931	0.0913	0.2247	0.1973	-	-	-	-
52	previously not reported*	FER	5:108210304:A:G	5	108210304	A	G	5:108108851:A:G	rs57928004	5	108108851	A	G	0.960159	intron_variant	MODIFIER	FER	ENSG00000151422	protein_coding	-	2/19	-	-	-	-	-	rs57928004	-	1	Ensembl	-	-	-	-	-	0.2165	0.3306	0.1902	0.0952	0.2247	0.1973	-	-	-	-
52	previously not reported*	FER	5:108210304:A:G	5	108210304	A	G	5:108109051:C:G	rs58304901	5	108109051	C	G	0.948756	intron_variant	MODIFIER	FER	ENSG00000151422	protein_coding	-	2/19	-	-	-	-	-	rs58304901	-	1	Ensembl	-	-	-	-	-	0.234	0.4002	0.1931	0.0913	0.2227	0.1973	-	-	-	-
52	previously not reported*	FER	5:108210304:A:G	5	108210304	A	G	5:108109274:A:T	rs58530168	5	108109274	T	A	0.948756	intron_variant	MODIFIER	FER	ENSG00000151422	protein_coding	-	2/19	-	-	-	-	-	rs58530168	-	1	Ensembl	-	-	-	-	-	0.2161	0.3396	0.1888	0.0913	0.2227	0.1902	-	-	-	-
52	previously not reported*	FER	5:108210304:A:G	5	108210304	A	G	5:108109386:A:T	rs57908514	5	108109386	A	T	0.948756	intron_variant	MODIFIER	FER	ENSG00000151422	protein_coding	-	2/19	-	-	-	-	-	rs57908514	-	1	Ensembl	-	-	-	-	-	0.2165	0.3359	0.1888	0.0913	0.2227	0.1973	-	-	-	-
52	previously not reported*	FER	5:108210304:A:G	5	108210304	A	G	5:108109523:A:T	rs113816291	5	108109523	T	A	0.948756	intron_variant	MODIFIER	FER	ENSG00000151422	protein_coding	-	2/19	-	-	-	-	-	rs113816291	-	1	Ensembl	-	-	-	-	-	0.2165	0.3359	0.1888	0.0913	0.2227	0.1973	-	-	-	-
52	previously not reported*	FER	5:108210304:A:G	5	108210304	A	G	5:108109794:C:T	rs62361335	5	108109794	C	T	0.948756	intron_variant	MODIFIER	FER	ENSG00000151422	protein_coding	-	2/19	-	-	-	-	-	rs62361335	-	1	Ensembl	-	-	-	-	-	0.2141	0.3328	0.1888	0.0903	0.2227	0.1902	-	-	-	-
52	previously not reported*	FER	5:108210304:A:G	5	108210304	A	G	5:108109888:A:G	rs10067117	5	108109888	A	G	0.960159	intron_variant	MODIFIER	FER	ENSG00000151422	protein_coding	-	2/19	-	-	-	-	-	rs10067117	-	1	Ensembl	-	-	-	-	-	0.2153	0.3359	0.1888	0.0903	0.2247	0.1902	-	-	-	-
52	previously not reported*	FER	5:108210304:A:G	5	108210304	A	G	5:108109906:A:T	rs62361336	5	108109906	A	T	0.948756	intron_variant	MODIFIER	FER	ENSG00000151422	protein_coding	-	2/19	-	-	-	-	-	rs62361336	-	1	Ensembl	-	-	-	-	-	0.2149	0.3359	0.1888	0.0903	0.2227	0.1902	-	-	-	-
52	previously not reported*	FER	5:108210304:A:G	5	108210304	A	G	5:108110055:C:T	rs62361337	5	108110055	C	T	0.948756	intron_variant	MODIFIER	FER	ENSG00000151422	protein_coding	-	2/19	-	-	-	-	-	rs62361337	-	1	Ensembl	-	-	-	-	-	0.2149	0.3359	0.1888	0.0903	0.2227	0.1902	-	-	-	-
52	previously not reported*	FER	5:108210304:A:G	5	108210304	A	G	5:108110324:G:T	rs4479887	5	108110324	G	T	0.943194	intron_variant	MODIFIER	FER	ENSG00000151422	protein_coding	-	2/19	-	-	-	-	-	rs4479887	-	1	Ensembl	-	-	-	-	-	0.2083	0.3359	0.1873	0.0575	0.2237	0.1902	-	-	-	-
52	previously not reported*	FER	5:108210304:A:G	5	108210304	A	G	5:108111333:A:G	rs1396444	5	108111333	G	A	0.960159	intron_variant	MODIFIER	FER	ENSG00000151422	protein_coding	-	2/19	-	-	-	-	-	rs1396444	-	1	Ensembl	-	-	-	-	-	0.2085	0.3359	0.1873	0.0575	0.2247	0.1902	-	-	-	-
52	previously not reported*	FER	5:108210304:A:G	5	108210304	A	G	5:108111931:A:G	rs3805598	5	108111931	G	A	0.960159	intron_variant	MODIFIER	FER	ENSG00000151422	protein_coding	-	2/19	-	-	-	-	-	rs3805598	-	1	Ensembl	-	-	-	-	-	0.2093	0.3389	0.1873	0.0575	0.2247	0.1902	-	-	-	-
52	previously not reported*	FER	5:108210304:A:G	5	108210304	A	G	5:108112359:A:G	rs62361338	5	108112359	G	A	0.918097	intron_variant	MODIFIER	FER	ENSG00000151422	protein_coding	-	2/19	-	-	-	-	-	rs62361338	-	1	Ensembl	-	-	-	-	-	0.2111	0.3359	0.1873	0.0575	0.2326	0.1953	-	-	-	-
52	previously not reported*	FER	5:108210304:A:G	5	108210304	A	G	5:108112521:C:T	rs4448048	5	108112521	C	T	0.960159	intron_variant	MODIFIER	FER	ENSG00000151422	protein_coding	-	2/19	-	-	-	-	-	rs4448048	-	1	Ensembl	-	-	-	-	-	0.2161	0.3389	0.1888	0.0903	0.2247	0.1902	-	-	-	-
52	previously not reported*	FER	5:108210304:A:G	5	108210304	A	G	5:108114108:A:C	rs10062211	5	108114108	C	A	0.960159	intron_variant	MODIFIER	FER	ENSG00000151422	protein_coding	-	2/19	-	-	-	-	-	rs10062211	-	1	Ensembl	-	-	-	-	-	0.2087	0.3366	0.1873	0.0575	0.2247	0.1902	-	-	-	-
52	previously not reported*	FER	5:108210304:A:G	5	108210304	A	G	5:108114711:D:I	rs531252744	5	108114711	D	I	0.932025	intron_variant	MODIFIER	FER	ENSG00000151422	protein_coding	-	2/19	-	-	-	-	-	rs531252744	-	1	Ensembl	-	-	-	-	-	0.2061	0.3079	0.1902	0.0655	0.2276	0.2025	-	-	-	-
52	previously not reported*	FER	5:108210304:A:G	5	108210304	A	G	5:108114966:C:T	rs7715658	5	108114966	C	T	0.960159	intron_variant	MODIFIER	FER	ENSG00000151422	protein_coding	-	2/19	-	-	-	-	-	rs7715658	-	1	Ensembl	-	-	-	-	-	0.2101	0.3366	0.1873	0.0575	0.2247	0.1973	-	-	-	-
52	previously not reported*	FER	5:108210304:A:G	5	108210304	A	G	5:108115021:A:C	rs7728920	5	108115021	A	C	0.960159	intron_variant	MODIFIER	FER	ENSG00000151422	protein_coding	-	2/19	-	-	-	-	-	rs7728920	-	1	Ensembl	-	-	-	-	-	0.2101	0.3366	0.1873	0.0575	0.2247	0.1973	-	-	-	-
52	previously not reported*	FER	5:108210304:A:G	5	108210304	A	G	5:108115365:A:T	rs10041659	5	108115365	A	T	0.960159	intron_variant	MODIFIER	FER	ENSG00000151422	protein_coding	-	2/19	-	-	-	-	-	rs10041659	-	1	Ensembl	-	-	-	-	-	-	-	-	-	-	-	-	-	-	-
52	previously not reported*	FER	5:108210304:A:G	5	108210304	A	G	5:108116279:A:T	rs10070327	5	108116279	A	T	0.960159	intron_variant	MODIFIER	FER	ENSG00000151422	protein_coding	-	2/19	-	-	-	-	-	rs10070327	-	1	Ensembl	-	-	-	-	-	0.2089	0.3374	0.1873	0.0575	0.2247	0.1902	-	-	-	-
52	previously not reported*	FER	5:108210304:A:G	5	108210304	A	G	5:108117869:A:G	rs62361341	5	108117869	G	A	0.954608	intron_variant	MODIFIER	FER	ENSG00000151422	protein_coding	-	2/19	-	-	-	-	-	rs62361341	-	1	Ensembl	-	-	-	-	-	0.2095	0.3389	0.1873	0.0575	0.2256	0.1902	-	-	-	-
52	previously not reported*	FER	5:108210304:A:G	5	108210304	A	G	5:108120029:A:G	rs17161505	5	108120029	A	G	0.960159	intron_variant	MODIFIER	FER	ENSG00000151422	protein_coding	-	2/19	-	-	-	-	-	rs17161505	-	1	Ensembl	-	-	-	-	-	0.2099	0.3396	0.1873	0.0546	0.2247	0.1953	-	-	-	-
52	previously not reported*	FER	5:108210304:A:G	5	108210304	A	G	5:108120115:A:G	rs62361342	5	108120115	G	A	0.960159	intron_variant	MODIFIER	FER	ENSG00000151422	protein_coding	-	2/19	-	-	-	-	-	rs62361342	-	1	Ensembl	-	-	-	-	-	0.2083	0.3336	0.1873	0.0546	0.2247	0.1953	-	-	-	-
52	previously not reported*	FER	5:108210304:A:G	5	108210304	A	G	5:108120322:G:T	rs62361343	5	108120322	G	T	0.960159	intron_variant	MODIFIER	FER	ENSG00000151422	protein_coding	-	2/19	-	-	-	-	-	rs62361343	-	1	Ensembl	-	-	-	-	-	0.2091	0.3366	0.1873	0.0546	0.2247	0.1953	-	-	-	-
52	previously not reported*	FER	5:108210304:A:G	5	108210304	A	G	5:108120958:A:G	rs2009646	5	108120958	G	A	0.960159	intron_variant	MODIFIER	FER	ENSG00000151422	protein_coding	-	2/19	-	-	-	-	-	rs2009646	-	1	Ensembl	-	-	-	-	-	0.2081	0.3366	0.1873	0.0546	0.2247	0.1902	-	-	-	-
52	previously not reported*	FER	5:108210304:A:G	5	108210304	A	G	5:108121356:A:G	rs2113001	5	108121356	G	A	0.960159	intron_variant	MODIFIER	FER	ENSG00000151422	protein_coding	-	2/19	-	-	-	-	-	rs2113001	-	1	Ensembl	-	-	-	-	-	0.2077	0.3366	0.1873	0.0546	0.2247	0.1881	-	-	-	21044948
52	previously not reported*	FER	5:108210304:A:G	5	108210304	A	G	5:108121764:A:T	rs7724385	5	108121764	A	T	0.960159	intron_variant	MODIFIER	FER	ENSG00000151422	protein_coding	-	2/19	-	-	-	-	-	rs7724385	-	1	Ensembl	-	-	-	-	-	0.2147	0.3366	0.1888	0.0883	0.2247	0.1881	-	-	-	-
52	previously not reported*	FER	5:108210304:A:G	5	108210304	A	G	5:108123171:C:G	rs2081127	5	108123171	C	G	0.960159	intron_variant	MODIFIER	FER	ENSG00000151422	protein_coding	-	2/19	-	-	-	-	-	rs2081127	-	1	Ensembl	-	-	-	-	-	0.2085	0.3396	0.1873	0.0565	0.2247	0.1861	-	-	-	-
52	previously not reported*	FER	5:108210304:A:G	5	108210304	A	G	5:108123506:C:T	rs2081128	5	108123506	T	C	0.960159	intron_variant	MODIFIER	FER	ENSG00000151422	protein_coding	-	2/19	-	-	-	-	-	rs2081128	-	1	Ensembl	-	-	-	-	-	0.2049	0.326	0.1873	0.0565	0.2247	0.1861	-	-	-	-
52	previously not reported*	FER	5:108210304:A:G	5	108210304	A	G	5:108124084:C:T	rs13360253	5	108124084	C	T	0.960159	intron_variant	MODIFIER	FER	ENSG00000151422	protein_coding	-	2/19	-	-	-	-	-	rs13360253	-	1	Ensembl	-	-	-	-	-	-	-	-	-	-	-	-	-	-	-
52	previously not reported*	FER	5:108210304:A:G	5	108210304	A	G	5:108124235:D:I	rs111580201	5	108124235	D	I	0.927061	intron_variant	MODIFIER	FER	ENSG00000151422	protein_coding	-	2/19	-	-	-	-	-	rs111580201	-	1	Ensembl	-	-	-	-	-	-	0.3578	0.0605	0.1131	0.0567	0.1503	-	-	-	-
52	previously not reported*	FER	5:108210304:A:G	5	108210304	A	G	5:108124336:A:G	rs10477428	5	108124336	G	A	0.960159	intron_variant	MODIFIER	FER	ENSG00000151422	protein_coding	-	2/19	-	-	-	-	-	rs10477428	-	1	Ensembl	-	-	-	-	-	0.2061	0.329	0.1873	0.0565	0.2247	0.1881	-	-	-	-
52	previously not reported*	FER	5:108210304:A:G	5	108210304	A	G	5:108124439:C:T	rs10477429	5	108124439	T	C	0.954972	intron_variant	MODIFIER	FER	ENSG00000151422	protein_coding	-	2/19	-	-	-	-	-	rs10477429	-	1	Ensembl	-	-	-	-	-	0.2065	0.329	0.1888	0.0565	0.2256	0.1881	-	-	-	-
52	previously not reported*	FER	5:108210304:A:G	5	108210304	A	G	5:108124482:C:T	rs10477430	5	108124482	C	T	0.954972	intron_variant	MODIFIER	FER	ENSG00000151422	protein_coding	-	2/19	-	-	-	-	-	rs10477430	-	1	Ensembl	-	-	-	-	-	0.2065	0.329	0.1888	0.0565	0.2256	0.1881	-	-	-	-
52	previously not reported*	FER	5:108210304:A:G	5	108210304	A	G	5:108124565:G:T	rs10477934	5	108124565	G	T	0.954972	intron_variant	MODIFIER	FER	ENSG00000151422	protein_coding	-	2/19	-	-	-	-	-	rs10477934	-	1	Ensembl	-	-	-	-	-	0.2133	0.329	0.1902	0.0893	0.2256	0.1881	-	-	-	-
52	previously not reported*	FER	5:108210304:A:G	5	108210304	A	G	5:108124779:A:G	rs62361344	5	108124779	G	A	0.960159	intron_variant	MODIFIER	FER	ENSG00000151422	protein_coding	-	2/19	-	-	-	-	-	rs62361344	-	1	Ensembl	-	-	-	-	-	0.2061	0.329	0.1873	0.0565	0.2247	0.1881	-	-	-	-
52	previously not reported*	FER	5:108210304:A:G	5	108210304	A	G	5:108125303:D:I	rs112328583	5	108125303	D	I	0.954139	intron_variant	MODIFIER	FER	ENSG00000151422	protein_coding	-	2/19	-	-	-	-	-	rs112328583	-	1	Ensembl	-	-	-	-	-	0.2039	0.3222	0.1844	0.0565	0.2237	0.1892	-	-	-	-
52	previously not reported*	FER	5:108210304:A:G	5	108210304	A	G	5:108126076:C:T	rs10477935	5	108126076	T	C	0.960159	intron_variant	MODIFIER	FER	ENSG00000151422	protein_coding	-	2/19	-	-	-	-	-	rs10477935	-	1	Ensembl	-	-	-	-	-	0.2057	0.329	0.1873	0.0565	0.2247	0.1861	-	-	-	-
52	previously not reported*	FER	5:108210304:A:G	5	108210304	A	G	5:108126906:C:G	rs28765243	5	108126906	G	C	0.960159	intron_variant	MODIFIER	FER	ENSG00000151422	protein_coding	-	2/19	-	-	-	-	-	rs28765243	-	1	Ensembl	-	-	-	-	-	-	-	-	-	-	-	-	-	-	-
52	previously not reported*	FER	5:108210304:A:G	5	108210304	A	G	5:108127411:A:G	rs6888173	5	108127411	A	G	0.960159	intron_variant	MODIFIER	FER	ENSG00000151422	protein_coding	-	2/19	-	-	-	-	-	rs6888173	-	1	Ensembl	-	-	-	-	-	0.2057	0.329	0.1873	0.0565	0.2247	0.1861	-	-	-	-
52	previously not reported*	FER	5:108210304:A:G	5	108210304	A	G	5:108128002:A:T	rs62361345	5	108128002	T	A	0.960159	intron_variant	MODIFIER	FER	ENSG00000151422	protein_coding	-	2/19	-	-	-	-	-	rs62361345	-	1	Ensembl	-	-	-	-	-	0.2057	0.329	0.1873	0.0565	0.2247	0.1861	-	-	-	-
52	previously not reported*	FER	5:108210304:A:G	5	108210304	A	G	5:108128505:C:G	rs6894386	5	108128505	C	G	0.960159	intron_variant	MODIFIER	FER	ENSG00000151422	protein_coding	-	2/19	-	-	-	-	-	rs6894386	-	1	Ensembl	-	-	-	-	-	0.2057	0.329	0.1873	0.0565	0.2247	0.1861	-	-	-	-
52	previously not reported*	FER	5:108210304:A:G	5	108210304	A	G	5:108128857:C:T	rs28862652	5	108128857	C	T	0.960159	intron_variant	MODIFIER	FER	ENSG00000151422	protein_coding	-	2/19	-	-	-	-	-	rs28862652	-	1	Ensembl	-	-	-	-	-	0.2061	0.3306	0.1873	0.0565	0.2247	0.1861	-	-	-	-
52	previously not reported*	FER	5:108210304:A:G	5	108210304	A	G	5:108128959:C:T	rs2900036	5	108128959	T	C	0.95444	intron_variant	MODIFIER	FER	ENSG00000151422	protein_coding	-	2/19	-	-	-	-	-	rs2900036	-	1	Ensembl	-	-	-	-	-	0.2055	0.329	0.1873	0.0565	0.2237	0.1861	-	-	-	-
52	previously not reported*	FER	5:108210304:A:G	5	108210304	A	G	5:108129897:C:T	rs58193244	5	108129897	C	T	0.960159	intron_variant	MODIFIER	FER	ENSG00000151422	protein_coding	-	2/19	-	-	-	-	-	rs58193244	-	1	Ensembl	-	-	-	-	-	0.2019	0.3147	0.1873	0.0565	0.2247	0.1861	-	-	-	-
52	previously not reported*	FER	5:108210304:A:G	5	108210304	A	G	5:108129940:C:T	rs111924886	5	108129940	C	T	0.960159	intron_variant	MODIFIER	FER	ENSG00000151422	protein_coding	-	2/19	-	-	-	-	-	rs111924886	-	1	Ensembl	-	-	-	-	-	0.2019	0.3147	0.1873	0.0565	0.2247	0.1861	-	-	-	-
52	previously not reported*	FER	5:108210304:A:G	5	108210304	A	G	5:108130067:C:T	rs113670069	5	108130067	C	T	0.960159	intron_variant	MODIFIER	FER	ENSG00000151422	protein_coding	-	2/19	-	-	-	-	-	rs113670069	-	1	Ensembl	-	-	-	-	-	0.2011	0.3116	0.1873	0.0565	0.2247	0.1861	-	-	-	-
52	previously not reported*	FER	5:108210304:A:G	5	108210304	A	G	5:108130075:C:T	rs113837779	5	108130075	C	T	0.960159	intron_variant	MODIFIER	FER	ENSG00000151422	protein_coding	-	2/19	-	-	-	-	-	rs113837779	-	1	Ensembl	-	-	-	-	-	0.2007	0.3101	0.1873	0.0565	0.2247	0.1861	-	-	-	-
52	previously not reported*	FER	5:108210304:A:G	5	108210304	A	G	5:108141927:C:T	rs13355571	5	108141927	C	T	0.960159	intron_variant	MODIFIER	FER	ENSG00000151422	protein_coding	-	3/19	-	-	-	-	-	rs13355571	-	1	Ensembl	-	-	-	-	-	0.1997	0.3056	0.1859	0.0575	0.2247	0.1871	-	-	-	-
52	previously not reported*	FER	5:108210304:A:G	5	108210304	A	G	5:108143015:C:T	rs1961616	5	108143015	T	C	0.960159	intron_variant	MODIFIER	FER	ENSG00000151422	protein_coding	-	3/19	-	-	-	-	-	rs1961616	-	1	Ensembl	-	-	-	-	-	0.1981	0.2995	0.1859	0.0575	0.2247	0.1871	-	-	-	-
52	previously not reported*	FER	5:108210304:A:G	5	108210304	A	G	5:108144192:D:I	rs112043812	5	108144192	D	I	0.960159	intron_variant	MODIFIER	FER	ENSG00000151422	protein_coding	-	3/19	-	-	-	-	-	rs112043812	-	1	Ensembl	-	-	-	-	-	0.1961	0.2995	0.1859	0.0575	0.2247	0.1769	-	-	-	-
52	previously not reported*	FER	5:108210304:A:G	5	108210304	A	G	5:108144429:A:G	rs6874773	5	108144429	G	A	0.960159	intron_variant	MODIFIER	FER	ENSG00000151422	protein_coding	-	3/19	-	-	-	-	-	rs6874773	-	1	Ensembl	-	-	-	-	-	0.1959	0.2988	0.1859	0.0575	0.2247	0.1769	-	-	-	-
52	previously not reported*	FER	5:108210304:A:G	5	108210304	A	G	5:108144458:C:T	rs6874497	5	108144458	C	T	0.960159	intron_variant	MODIFIER	FER	ENSG00000151422	protein_coding	-	3/19	-	-	-	-	-	rs6874497	-	1	Ensembl	-	-	-	-	-	0.1961	0.2988	0.1859	0.0575	0.2247	0.1779	-	-	-	-
52	previously not reported*	FER	5:108210304:A:G	5	108210304	A	G	5:108144662:A:G	rs6875158	5	108144662	G	A	0.960159	intron_variant	MODIFIER	FER	ENSG00000151422	protein_coding	-	3/19	-	-	-	-	-	rs6875158	-	1	Ensembl	-	-	-	-	-	0.1959	0.2988	0.1859	0.0575	0.2247	0.1769	-	-	-	-
52	previously not reported*	FER	5:108210304:A:G	5	108210304	A	G	5:108145010:C:T	rs10477937	5	108145010	C	T	0.960159	intron_variant	MODIFIER	FER	ENSG00000151422	protein_coding	-	3/19	-	-	-	-	-	rs10477937	-	1	Ensembl	-	-	-	-	-	0.1959	0.2988	0.1859	0.0575	0.2247	0.1769	-	-	-	-
52	previously not reported*	FER	5:108210304:A:G	5	108210304	A	G	5:108145817:C:T	rs2900037	5	108145817	C	T	0.960159	intron_variant	MODIFIER	FER	ENSG00000151422	protein_coding	-	3/19	-	-	-	-	-	rs2900037	-	1	Ensembl	-	-	-	-	-	0.1963	0.3003	0.1859	0.0575	0.2247	0.1769	-	-	-	-
52	previously not reported*	FER	5:108210304:A:G	5	108210304	A	G	5:108146126:C:T	rs4537096	5	108146126	C	T	0.960159	intron_variant	MODIFIER	FER	ENSG00000151422	protein_coding	-	3/19	-	-	-	-	-	rs4537096	-	1	Ensembl	-	-	-	-	-	0.2065	0.3381	0.1859	0.0575	0.2247	0.1779	-	-	-	-
52	previously not reported*	FER	5:108210304:A:G	5	108210304	A	G	5:108147894:A:G	rs75196817	5	108147894	A	G	0.960159	intron_variant	MODIFIER	FER	ENSG00000151422	protein_coding	-	3/19	-	-	-	-	-	rs75196817	-	1	Ensembl	-	-	-	-	-	0.1963	0.3003	0.1859	0.0575	0.2247	0.1769	-	-	-	-
52	previously not reported*	FER	5:108210304:A:G	5	108210304	A	G	5:108148121:A:G	rs57561676	5	108148121	G	A	0.939178	intron_variant	MODIFIER	FER	ENSG00000151422	protein_coding	-	3/19	-	-	-	-	-	rs57561676	-	1	Ensembl	-	-	-	-	-	0.1975	0.3003	0.1888	0.0575	0.2286	0.1769	-	-	-	-
52	previously not reported*	FER	5:108210304:A:G	5	108210304	A	G	5:108148476:A:T	rs60618804	5	108148476	A	T	0.960159	intron_variant	MODIFIER	FER	ENSG00000151422	protein_coding	-	3/19	-	-	-	-	-	rs60618804	-	1	Ensembl	-	-	-	-	-	0.1963	0.3003	0.1859	0.0575	0.2247	0.1769	-	-	-	-
52	previously not reported*	FER	5:108210304:A:G	5	108210304	A	G	5:108148805:C:T	rs62363280	5	108148805	T	C	0.960159	intron_variant	MODIFIER	FER	ENSG00000151422	protein_coding	-	3/19	-	-	-	-	-	rs62363280	-	1	Ensembl	-	-	-	-	-	0.1963	0.3003	0.1859	0.0575	0.2247	0.1769	-	-	-	-
52	previously not reported*	FER	5:108210304:A:G	5	108210304	A	G	5:108148835:C:T	rs62363281	5	108148835	C	T	0.960159	intron_variant	MODIFIER	FER	ENSG00000151422	protein_coding	-	3/19	-	-	-	-	-	rs62363281	-	1	Ensembl	-	-	-	-	-	0.1963	0.3003	0.1859	0.0575	0.2247	0.1769	-	-	-	-
52	previously not reported*	FER	5:108210304:A:G	5	108210304	A	G	5:108149069:A:G	rs28633642	5	108149069	G	A	0.960159	intron_variant	MODIFIER	FER	ENSG00000151422	protein_coding	-	3/19	-	-	-	-	-	rs28633642	-	1	Ensembl	-	-	-	-	-	0.1965	0.3003	0.1873	0.0575	0.2247	0.1769	-	-	-	-
52	previously not reported*	FER	5:108210304:A:G	5	108210304	A	G	5:108149792:D:I	rs59660200	5	108149792	D	I	0.960159	intron_variant	MODIFIER	FER	ENSG00000151422	protein_coding	-	3/19	-	-	-	-	-	rs59660200	-	1	Ensembl	-	-	-	-	-	0.1963	0.3003	0.1859	0.0575	0.2247	0.1769	-	-	-	-
52	previously not reported*	FER	5:108210304:A:G	5	108210304	A	G	5:108150158:G:T	rs9885265	5	108150158	G	T	0.960159	intron_variant	MODIFIER	FER	ENSG00000151422	protein_coding	-	3/19	-	-	-	-	-	rs9885265	-	1	Ensembl	-	-	-	-	-	-	-	-	-	-	-	-	-	-	-
52	previously not reported*	FER	5:108210304:A:G	5	108210304	A	G	5:108150188:G:T	rs9885428	5	108150188	T	G	0.960159	intron_variant	MODIFIER	FER	ENSG00000151422	protein_coding	-	3/19	-	-	-	-	-	rs9885428	-	1	Ensembl	-	-	-	-	-	0.1963	0.3003	0.1859	0.0575	0.2247	0.1769	-	-	-	-
52	previously not reported*	FER	5:108210304:A:G	5	108210304	A	G	5:108151711:C:G	rs57703314	5	108151711	G	C	0.960159	intron_variant	MODIFIER	FER	ENSG00000151422	protein_coding	-	3/19	-	-	-	-	-	rs57703314	-	1	Ensembl	-	-	-	-	-	-	-	-	-	-	-	-	-	-	-
52	previously not reported*	FER	5:108210304:A:G	5	108210304	A	G	5:108152069:C:T	rs75981347	5	108152069	T	C	0.960159	intron_variant	MODIFIER	FER	ENSG00000151422	protein_coding	-	3/19	-	-	-	-	-	rs75981347	-	1	Ensembl	-	-	-	-	-	0.1953	0.2965	0.1859	0.0575	0.2247	0.1769	-	-	-	-
52	previously not reported*	FER	5:108210304:A:G	5	108210304	A	G	5:108152428:A:G	rs10041657	5	108152428	G	A	0.960159	intron_variant	MODIFIER	FER	ENSG00000151422	protein_coding	-	3/19	-	-	-	-	-	rs10041657	-	1	Ensembl	-	-	-	-	-	0.1961	0.2995	0.1859	0.0575	0.2247	0.1769	-	-	1	-
52	previously not reported*	FER	5:108210304:A:G	5	108210304	A	G	5:108153401:A:C	rs62363283	5	108153401	A	C	0.960159	intron_variant	MODIFIER	FER	ENSG00000151422	protein_coding	-	3/19	-	-	-	-	-	rs62363283	-	1	Ensembl	-	-	-	-	-	0.1967	0.3026	0.1859	0.0565	0.2247	0.1769	-	-	-	-
52	previously not reported*	FER	5:108210304:A:G	5	108210304	A	G	5:108156259:A:T	rs10477432	5	108156259	T	A	0.960159	intron_variant	MODIFIER	FER	ENSG00000151422	protein_coding	-	3/19	-	-	-	-	-	rs10477432	-	1	Ensembl	-	-	-	-	-	0.1963	0.3011	0.1859	0.0565	0.2247	0.1769	-	-	-	-
52	previously not reported*	FER	5:108210304:A:G	5	108210304	A	G	5:108156618:C:G	rs9326749	5	108156618	G	C	0.960159	intron_variant	MODIFIER	FER	ENSG00000151422	protein_coding	-	3/19	-	-	-	-	-	rs9326749	-	1	Ensembl	-	-	-	-	-	0.1947	0.2943	0.1859	0.0565	0.2247	0.1779	-	-	-	-
52	previously not reported*	FER	5:108210304:A:G	5	108210304	A	G	5:108156879:A:G	rs10050547	5	108156879	A	G	0.960159	intron_variant	MODIFIER	FER	ENSG00000151422	protein_coding	-	3/19	-	-	-	-	-	rs10050547	-	1	Ensembl	-	-	-	-	-	0.1953	0.2965	0.1859	0.0565	0.2247	0.1779	-	-	-	-
52	previously not reported*	FER	5:108210304:A:G	5	108210304	A	G	5:108157574:A:G	rs62363284	5	108157574	G	A	0.960159	intron_variant	MODIFIER	FER	ENSG00000151422	protein_coding	-	3/19	-	-	-	-	-	rs62363284	-	1	Ensembl	-	-	-	-	-	0.1963	0.3003	0.1859	0.0565	0.2247	0.1779	-	-	-	-
52	previously not reported*	FER	5:108210304:A:G	5	108210304	A	G	5:108158552:A:G	rs113866295	5	108158552	G	A	0.954608	intron_variant	MODIFIER	FER	ENSG00000151422	protein_coding	-	3/19	-	-	-	-	-	rs113866295	-	1	Ensembl	-	-	-	-	-	0.1957	0.2965	0.1873	0.0565	0.2256	0.1779	-	-	-	-
52	previously not reported*	FER	5:108210304:A:G	5	108210304	A	G	5:108161707:C:T	rs78964974	5	108161707	T	C	0.971705	intron_variant	MODIFIER	FER	ENSG00000151422	protein_coding	-	3/19	-	-	-	-	-	rs78964974	-	1	Ensembl	-	-	-	-	-	0.1951	0.292	0.1902	0.0565	0.2266	0.1779	-	-	-	-
52	previously not reported*	FER	5:108210304:A:G	5	108210304	A	G	5:108162268:A:G	rs62363285	5	108162268	A	G	0.971705	intron_variant	MODIFIER	FER	ENSG00000151422	protein_coding	-	3/19	-	-	-	-	-	rs62363285	-	1	Ensembl	-	-	-	-	-	0.2023	0.3177	0.1931	0.0565	0.2266	0.1779	-	-	-	-
52	previously not reported*	FER	5:108210304:A:G	5	108210304	A	G	5:108162307:A:G	rs6876542	5	108162307	G	A	0.971705	intron_variant	MODIFIER	FER	ENSG00000151422	protein_coding	-	3/19	-	-	-	-	-	rs6876542	-	1	Ensembl	-	-	-	-	-	0.1959	0.295	0.1902	0.0565	0.2266	0.1779	-	-	-	-
52	previously not reported*	FER	5:108210304:A:G	5	108210304	A	G	5:108162509:C:T	rs6876606	5	108162509	C	T	0.971705	intron_variant	MODIFIER	FER	ENSG00000151422	protein_coding	-	3/19	-	-	-	-	-	rs6876606	-	1	Ensembl	-	-	-	-	-	0.1967	0.298	0.1902	0.0565	0.2266	0.1779	-	-	-	-
52	previously not reported*	FER	5:108210304:A:G	5	108210304	A	G	5:108164591:A:G	rs62363287	5	108164591	G	A	0.971705	intron_variant	MODIFIER	FER	ENSG00000151422	protein_coding	-	3/19	-	-	-	-	-	rs62363287	-	1	Ensembl	-	-	-	-	-	0.1967	0.298	0.1902	0.0565	0.2266	0.1779	-	-	-	-
52	previously not reported*	FER	5:108210304:A:G	5	108210304	A	G	5:108165445:C:T	rs889269	5	108165445	T	C	0.971705	intron_variant	MODIFIER	FER	ENSG00000151422	protein_coding	-	3/19	-	-	-	-	-	rs889269	-	1	Ensembl	-	-	-	-	-	0.1967	0.298	0.1902	0.0565	0.2266	0.1779	-	-	-	-
52	previously not reported*	FER	5:108210304:A:G	5	108210304	A	G	5:108166136:C:T	rs13354622	5	108166136	T	C	0.971705	intron_variant	MODIFIER	FER	ENSG00000151422	protein_coding	-	3/19	-	-	-	-	-	rs13354622	-	1	Ensembl	-	-	-	-	-	0.1981	0.2973	0.1902	0.0565	0.2266	0.1861	-	-	-	-
52	previously not reported*	FER	5:108210304:A:G	5	108210304	A	G	5:108167061:A:G	rs6873917	5	108167061	A	G	0.971705	intron_variant	MODIFIER	FER	ENSG00000151422	protein_coding	-	3/19	-	-	-	-	-	rs6873917	-	1	Ensembl	-	-	-	-	-	0.1967	0.298	0.1902	0.0565	0.2266	0.1779	-	-	-	-
52	previously not reported*	FER	5:108210304:A:G	5	108210304	A	G	5:108167682:A:T	rs4283844	5	108167682	A	T	0.971705	intron_variant	MODIFIER	FER	ENSG00000151422	protein_coding	-	3/19	-	-	-	-	-	rs4283844	-	1	Ensembl	-	-	-	-	-	0.1977	0.3011	0.1916	0.0565	0.2266	0.1779	-	-	-	-
52	previously not reported*	FER	5:108210304:A:G	5	108210304	A	G	5:108167897:D:I	rs5870332	5	108167897	I	G	0.971705	intron_variant	MODIFIER	FER	ENSG00000151422	protein_coding	-	3/19	-	-	-	-	-	rs5870332	-	1	Ensembl	-	-	-	-	-	0.1959	0.295	0.1902	0.0565	0.2266	0.1779	-	-	-	-
52	previously not reported*	FER	5:108210304:A:G	5	108210304	A	G	5:108167904:D:I	rs144311716	5	108167904	I	C	0.971705	intron_variant	MODIFIER	FER	ENSG00000151422	protein_coding	-	3/19	-	-	-	-	-	rs144311716	-	1	Ensembl	-	-	-	-	-	0.1959	0.2943	0.1902	0.0575	0.2266	0.1779	-	-	-	-
52	previously not reported*	FER	5:108210304:A:G	5	108210304	A	G	5:108168142:A:G	rs4361568	5	108168142	A	G	0.965914	intron_variant	MODIFIER	FER	ENSG00000151422	protein_coding	-	3/19	-	-	-	-	-	rs4361568	-	1	Ensembl	-	-	-	-	-	0.1973	0.3011	0.1902	0.0565	0.2256	0.1779	-	-	-	-
52	previously not reported*	FER	5:108210304:A:G	5	108210304	A	G	5:108169555:A:T	rs62363289	5	108169555	T	A	0.971705	intron_variant	MODIFIER	FER	ENSG00000151422	protein_coding	-	4/19	-	-	-	-	-	rs62363289	-	1	Ensembl	-	-	-	-	-	0.1979	0.3018	0.1916	0.0565	0.2266	0.1779	-	-	-	-
52	previously not reported*	FER	5:108210304:A:G	5	108210304	A	G	5:108169699:D:I	rs530644231	5	108169699	D	I	0.971705	intron_variant	MODIFIER	FER	ENSG00000151422	protein_coding	-	4/19	-	-	-	-	-	rs530644231	-	1	Ensembl	-	-	-	-	-	0.1959	0.295	0.1902	0.0565	0.2266	0.1779	-	-	-	-
52	previously not reported*	FER	5:108210304:A:G	5	108210304	A	G	5:108170794:G:T	rs10054086	5	108170794	G	T	0.971705	intron_variant	MODIFIER	FER	ENSG00000151422	protein_coding	-	4/19	-	-	-	-	-	rs10054086	-	1	Ensembl	-	-	-	-	-	0.1961	0.298	0.1902	0.0565	0.2266	0.1748	-	-	-	-
52	previously not reported*	FER	5:108210304:A:G	5	108210304	A	G	5:108172540:A:T	rs6863046	5	108172540	A	T	0.971705	intron_variant	MODIFIER	FER	ENSG00000151422	protein_coding	-	5/19	-	-	-	-	-	rs6863046	-	1	Ensembl	-	-	-	-	-	0.1963	0.2973	0.1902	0.0575	0.2266	0.1759	-	-	-	-
52	previously not reported*	FER	5:108210304:A:G	5	108210304	A	G	5:108173003:A:G	rs9326750	5	108173003	G	A	0.977287	intron_variant	MODIFIER	FER	ENSG00000151422	protein_coding	-	5/19	-	-	-	-	-	rs9326750	-	1	Ensembl	-	-	-	-	-	0.1963	0.298	0.1902	0.0575	0.2256	0.1759	-	-	-	-
52	previously not reported*	FER	5:108210304:A:G	5	108210304	A	G	5:108178451:A:G	rs62363290	5	108178451	G	A	0.977287	intron_variant	MODIFIER	FER	ENSG00000151422	protein_coding	-	5/19	-	-	-	-	-	rs62363290	-	1	Ensembl	-	-	-	-	-	0.1957	0.2958	0.1902	0.0575	0.2256	0.1759	-	-	-	-
52	previously not reported*	FER	5:108210304:A:G	5	108210304	A	G	5:108178876:C:T	rs59297048	5	108178876	C	T	0.977287	intron_variant	MODIFIER	FER	ENSG00000151422	protein_coding	-	5/19	-	-	-	-	-	rs59297048	-	1	Ensembl	-	-	-	-	-	0.1949	0.2927	0.1902	0.0575	0.2256	0.1759	-	-	-	-
52	previously not reported*	FER	5:108210304:A:G	5	108210304	A	G	5:108179760:D:I	rs141276748	5	108179760	I	C	0.966165	intron_variant	MODIFIER	FER	ENSG00000151422	protein_coding	-	5/19	-	-	-	-	-	rs141276748	-	1	Ensembl	-	-	-	-	-	0.1991	0.3033	0.1916	0.0605	0.2276	0.1769	-	-	-	-
52	previously not reported*	FER	5:108210304:A:G	5	108210304	A	G	5:108179863:A:G	rs5019041	5	108179863	A	G	0.919307	intron_variant	MODIFIER	FER	ENSG00000151422	protein_coding	-	5/19	-	-	-	-	-	rs5019041	-	1	Ensembl	-	-	-	-	-	0.2035	0.3124	0.2003	0.0565	0.2366	0.1759	-	-	-	-
52	previously not reported*	FER	5:108210304:A:G	5	108210304	A	G	5:108180530:A:G	rs10040085	5	108180530	G	A	0.977287	intron_variant	MODIFIER	FER	ENSG00000151422	protein_coding	-	5/19	-	-	-	-	-	rs10040085	-	1	Ensembl	-	-	-	-	-	0.1955	0.2958	0.1902	0.0575	0.2256	0.1748	-	-	-	-
52	previously not reported*	FER	5:108210304:A:G	5	108210304	A	G	5:108181894:G:T	rs13358531	5	108181894	G	T	0.948715	intron_variant	MODIFIER	FER	ENSG00000151422	protein_coding	-	5/19	-	-	-	-	-	rs13358531	-	1	Ensembl	-	-	-	-	-	0.1951	0.298	0.1916	0.0575	0.2207	0.1738	-	-	-	-
52	previously not reported*	FER	5:108210304:A:G	5	108210304	A	G	5:108183297:C:T	rs7716358	5	108183297	T	C	0.948715	intron_variant	MODIFIER	FER	ENSG00000151422	protein_coding	-	5/19	-	-	-	-	-	rs7716358	-	1	Ensembl	-	-	-	-	-	0.1957	0.3003	0.1916	0.0575	0.2207	0.1738	-	-	-	-
52	previously not reported*	FER	5:108210304:A:G	5	108210304	A	G	5:108183739:C:T	rs10078143	5	108183739	T	C	0.943107	intron_variant	MODIFIER	FER	ENSG00000151422	protein_coding	-	5/19	-	-	-	-	-	rs10078143	-	1	Ensembl	-	-	-	-	-	0.1959	0.3003	0.1916	0.0575	0.2217	0.1738	-	-	-	-
52	previously not reported*	FER	5:108210304:A:G	5	108210304	A	G	5:108184248:A:T	rs6881932	5	108184248	T	A	0.948715	intron_variant	MODIFIER	FER	ENSG00000151422	protein_coding	-	5/19	-	-	-	-	-	rs6881932	-	1	Ensembl	-	-	-	-	-	0.1957	0.3003	0.1916	0.0575	0.2207	0.1738	-	-	-	-
52	previously not reported*	FER	5:108210304:A:G	5	108210304	A	G	5:108185250:C:T	rs10052531	5	108185250	C	T	0.948715	intron_variant	MODIFIER	FER	ENSG00000151422	protein_coding	-	5/19	-	-	-	-	-	rs10052531	-	1	Ensembl	-	-	-	-	-	0.1943	0.295	0.1916	0.0575	0.2207	0.1738	-	-	-	-
52	previously not reported*	FER	5:108210304:A:G	5	108210304	A	G	5:108186813:G:T	rs79840901	5	108186813	T	G	0.948715	intron_variant	MODIFIER	FER	ENSG00000151422	protein_coding	-	5/19	-	-	-	-	-	rs79840901	-	1	Ensembl	-	-	-	-	-	0.1951	0.2973	0.1916	0.0585	0.2207	0.1738	-	-	-	-
52	previously not reported*	FER	5:108210304:A:G	5	108210304	A	G	5:108187489:C:T	rs10064960	5	108187489	T	C	0.942757	intron_variant	MODIFIER	FER	ENSG00000151422	protein_coding	-	5/19	-	-	-	-	-	rs10064960	-	1	Ensembl	-	-	-	-	-	-	-	-	-	-	-	-	-	-	-
52	previously not reported*	FER	5:108210304:A:G	5	108210304	A	G	5:108188592:A:G	rs17161540	5	108188592	A	G	0.948715	intron_variant	MODIFIER	FER	ENSG00000151422	protein_coding	-	5/19	-	-	-	-	-	rs17161540	-	1	Ensembl	-	-	-	-	-	0.1985	0.3109	0.1916	0.0575	0.2207	0.1738	-	-	-	-
52	previously not reported*	FER	5:108210304:A:G	5	108210304	A	G	5:108189715:C:T	rs13359423	5	108189715	T	C	0.971401	intron_variant	MODIFIER	FER	ENSG00000151422	protein_coding	-	5/19	-	-	-	-	-	rs13359423	-	1	Ensembl	-	-	-	-	-	0.1943	0.3026	0.1844	0.0575	0.2167	0.1728	-	-	-	-
52	previously not reported*	FER	5:108210304:A:G	5	108210304	A	G	5:108190727:A:G	rs10039951	5	108190727	G	A	0.94275	intron_variant	MODIFIER	FER	ENSG00000151422	protein_coding	-	5/19	-	-	-	-	-	rs10039951	-	1	Ensembl	-	-	-	-	-	0.2023	0.3101	0.1888	0.0625	0.2217	0.1902	-	-	-	-
52	previously not reported*	FER	5:108210304:A:G	5	108210304	A	G	5:108191536:C:G	rs10065611	5	108191536	G	C	0.971401	intron_variant	MODIFIER	FER	ENSG00000151422	protein_coding	-	5/19	-	-	-	-	-	rs10065611	-	1	Ensembl	-	-	-	-	-	0.1913	0.2912	0.1844	0.0575	0.2167	0.1728	-	-	-	-
52	previously not reported*	FER	5:108210304:A:G	5	108210304	A	G	5:108192031:A:G	rs10052208	5	108192031	A	G	0.971401	intron_variant	MODIFIER	FER	ENSG00000151422	protein_coding	-	5/19	-	-	-	-	-	rs10052208	-	1	Ensembl	-	-	-	-	-	0.1945	0.3041	0.1844	0.0575	0.2167	0.1718	-	-	-	-
52	previously not reported*	FER	5:108210304:A:G	5	108210304	A	G	5:108193157:A:G	rs10036583	5	108193157	A	G	0.971401	intron_variant	MODIFIER	FER	ENSG00000151422	protein_coding	-	5/19	-	-	-	-	-	rs10036583	-	1	Ensembl	-	-	-	-	-	0.1911	0.2912	0.1844	0.0575	0.2167	0.1718	-	-	-	-
52	previously not reported*	FER	5:108210304:A:G	5	108210304	A	G	5:108193235:C:T	rs10042152	5	108193235	C	T	0.971401	intron_variant	MODIFIER	FER	ENSG00000151422	protein_coding	-	5/19	-	-	-	-	-	rs10042152	-	1	Ensembl	-	-	-	-	-	0.1945	0.3041	0.1844	0.0575	0.2167	0.1718	-	-	-	-
52	previously not reported*	FER	5:108210304:A:G	5	108210304	A	G	5:108194467:D:I	rs200932820	5	108194467	I	A	0.948715	intron_variant	MODIFIER	FER	ENSG00000151422	protein_coding	-	5/19	-	-	-	-	-	rs200932820	-	1	Ensembl	-	-	-	-	-	0.2268	0.4123	0.1945	0.0585	0.2207	0.1789	-	-	-	-
52	previously not reported*	FER	5:108210304:A:G	5	108210304	A	G	5:108194472:C:T	rs200584255	5	108194472	T	C	0.948715	intron_variant	MODIFIER	FER	ENSG00000151422	protein_coding	-	5/19	-	-	-	-	-	rs200584255	-	1	Ensembl	-	-	-	-	-	0.2268	0.4123	0.1945	0.0585	0.2207	0.1789	-	-	-	-
52	previously not reported*	FER	5:108210304:A:G	5	108210304	A	G	5:108195948:D:I	rs111373307	5	108195948	D	I	0.901018	intron_variant	MODIFIER	FER	ENSG00000151422	protein_coding	-	5/19	-	-	-	-	-	rs111373307	-	1	Ensembl	-	-	-	-	-	0.1881	0.3048	0.1758	0.0585	0.2038	0.1564	-	-	-	-
52	previously not reported*	FER	5:108210304:A:G	5	108210304	A	G	5:108196668:C:T	rs79868706	5	108196668	C	T	0.971401	intron_variant	MODIFIER	FER	ENSG00000151422	protein_coding	-	5/19	-	-	-	-	-	rs79868706	-	1	Ensembl	-	-	-	-	-	0.1903	0.289	0.183	0.0575	0.2167	0.1718	-	-	-	-
52	previously not reported*	FER	5:108210304:A:G	5	108210304	A	G	5:108197374:A:G	rs62360777	5	108197374	G	A	0.971401	intron_variant	MODIFIER	FER	ENSG00000151422	protein_coding	-	5/19	-	-	-	-	-	rs62360777	-	1	Ensembl	-	-	-	-	-	0.1943	0.3041	0.183	0.0575	0.2167	0.1718	-	-	-	-
52	previously not reported*	FER	5:108210304:A:G	5	108210304	A	G	5:108198869:A:G	rs113160450	5	108198869	G	A	0.971401	intron_variant	MODIFIER	FER	ENSG00000151422	protein_coding	-	5/19	-	-	-	-	-	rs113160450	-	1	Ensembl	-	-	-	-	-	0.1929	0.2988	0.183	0.0575	0.2167	0.1718	-	-	-	-
52	previously not reported*	FER	5:108210304:A:G	5	108210304	A	G	5:108200981:A:T	rs10058519	5	108200981	A	T	0.965646	intron_variant	MODIFIER	FER	ENSG00000151422	protein_coding	-	5/19	-	-	-	-	-	rs10058519	-	1	Ensembl	-	-	-	-	-	0.1939	0.3018	0.1844	0.0575	0.2157	0.1728	-	-	-	-
52	previously not reported*	FER	5:108210304:A:G	5	108210304	A	G	5:108201844:G:T	rs62360778	5	108201844	T	G	0.971401	intron_variant	MODIFIER	FER	ENSG00000151422	protein_coding	-	5/19	-	-	-	-	-	rs62360778	-	1	Ensembl	-	-	-	-	-	0.1937	0.3011	0.1844	0.0575	0.2167	0.1718	-	-	-	-
52	previously not reported*	FER	5:108210304:A:G	5	108210304	A	G	5:108203264:D:I	rs113463407	5	108203264	D	I	0.971401	intron_variant	MODIFIER	FER	ENSG00000151422	protein_coding	-	5/19	-	-	-	-	-	rs113463407	-	1	Ensembl	-	-	-	-	-	0.1943	0.3033	0.1844	0.0575	0.2167	0.1718	-	-	-	-
52	previously not reported*	FER	5:108210304:A:G	5	108210304	A	G	5:108204013:A:G	rs62360779	5	108204013	A	G	0.971401	intron_variant	MODIFIER	FER	ENSG00000151422	protein_coding	-	6/19	-	-	-	-	-	rs62360779	-	1	Ensembl	-	-	-	-	-	0.1945	0.3041	0.1844	0.0575	0.2167	0.1718	-	-	-	-
52	previously not reported*	FER	5:108210304:A:G	5	108210304	A	G	5:108205139:A:C	rs10037675	5	108205139	A	C	0.971401	intron_variant	MODIFIER	FER	ENSG00000151422	protein_coding	-	6/19	-	-	-	-	-	rs10037675	-	1	Ensembl	-	-	-	-	-	0.1943	0.3041	0.183	0.0575	0.2167	0.1718	-	-	-	-
52	previously not reported*	FER	5:108210304:A:G	5	108210304	A	G	5:108207514:A:G	rs1423459	5	108207514	A	G	0.971401	intron_variant	MODIFIER	FER	ENSG00000151422	protein_coding	-	7/19	-	-	-	-	-	rs1423459	-	1	Ensembl	-	-	-	-	-	0.1937	0.3018	0.183	0.0575	0.2167	0.1718	-	-	-	-
52	previously not reported*	FER	5:108210304:A:G	5	108210304	A	G	5:108208280:C:T	rs41508849	5	108208280	T	C	0.971401	intron_variant	MODIFIER	FER	ENSG00000151422	protein_coding	-	8/19	-	-	-	-	-	rs41508849	-	1	Ensembl	-	-	-	-	-	0.1897	0.289	0.1801	0.0575	0.2167	0.1708	-	-	-	-
52	previously not reported*	FER	5:108210304:A:G	5	108210304	A	G	5:108209206:A:G	rs79524055	5	108209206	G	A	1	intron_variant	MODIFIER	FER	ENSG00000151422	protein_coding	-	8/19	-	-	-	-	-	rs79524055	-	1	Ensembl	-	-	-	-	-	0.1951	0.3026	0.183	0.0575	0.2217	0.1728	-	-	-	-
52	previously not reported*	FER	5:108210304:A:G	5	108210304	A	G	5:108209488:C:T	rs62360783	5	108209488	C	T	1	intron_variant	MODIFIER	FER	ENSG00000151422	protein_coding	-	8/19	-	-	-	-	-	rs62360783	-	1	Ensembl	-	-	-	-	-	0.1951	0.3026	0.183	0.0575	0.2217	0.1728	-	-	-	-
52	previously not reported*	FER	5:108210304:A:G	5	108210304	A	G	5:108209645:G:T	rs80034202	5	108209645	G	T	1	intron_variant	MODIFIER	FER	ENSG00000151422	protein_coding	-	8/19	-	-	-	-	-	rs80034202	-	1	Ensembl	-	-	-	-	-	0.1951	0.3026	0.183	0.0575	0.2217	0.1728	-	-	-	-
52	previously not reported*	FER	5:108210304:A:G	5	108210304	A	G	5:108210304:A:G	rs6889995	5	108210304	A	G	1	intron_variant	MODIFIER	FER	ENSG00000151422	protein_coding	-	8/19	-	-	-	-	-	rs6889995	-	1	Ensembl	-	-	-	-	-	0.1949	0.3018	0.183	0.0575	0.2217	0.1728	-	-	-	-
52	previously not reported*	FER	5:108210304:A:G	5	108210304	A	G	5:108210396:C:T	rs6890301	5	108210396	C	T	1	intron_variant	MODIFIER	FER	ENSG00000151422	protein_coding	-	8/19	-	-	-	-	-	rs6890301	-	1	Ensembl	-	-	-	-	-	0.1951	0.3026	0.183	0.0575	0.2217	0.1728	-	-	-	-
52	previously not reported*	FER	5:108210304:A:G	5	108210304	A	G	5:108210526:A:G	rs62360784	5	108210526	A	G	1	intron_variant	MODIFIER	FER	ENSG00000151422	protein_coding	-	8/19	-	-	-	-	-	rs62360784	-	1	Ensembl	-	-	-	-	-	0.1949	0.3018	0.183	0.0575	0.2217	0.1728	-	-	-	-
52	previously not reported*	FER	5:108210304:A:G	5	108210304	A	G	5:108210749:C:T	rs10061362	5	108210749	T	C	1	intron_variant	MODIFIER	FER	ENSG00000151422	protein_coding	-	8/19	-	-	-	-	-	rs10061362	-	1	Ensembl	-	-	-	-	-	0.1951	0.3026	0.183	0.0575	0.2217	0.1728	-	-	-	-
52	previously not reported*	FER	5:108210304:A:G	5	108210304	A	G	5:108211588:G:T	rs6594341	5	108211588	G	T	1	intron_variant	MODIFIER	FER	ENSG00000151422	protein_coding	-	8/19	-	-	-	-	-	rs6594341	-	1	Ensembl	-	-	-	-	-	0.1951	0.3026	0.183	0.0575	0.2217	0.1728	-	-	-	-
52	previously not reported*	FER	5:108210304:A:G	5	108210304	A	G	5:108211751:A:C	rs6594342	5	108211751	A	C	1	intron_variant	MODIFIER	FER	ENSG00000151422	protein_coding	-	8/19	-	-	-	-	-	rs6594342	-	1	Ensembl	-	-	-	-	-	0.1957	0.3048	0.183	0.0575	0.2217	0.1728	-	-	-	-
52	previously not reported*	FER	5:108210304:A:G	5	108210304	A	G	5:108213168:A:G	rs35141056	5	108213168	A	G	1	intron_variant	MODIFIER	FER	ENSG00000151422	protein_coding	-	8/19	-	-	-	-	-	rs35141056	-	1	Ensembl	-	-	-	-	-	0.1957	0.3048	0.183	0.0575	0.2217	0.1728	-	-	-	-
52	previously not reported*	FER	5:108210304:A:G	5	108210304	A	G	5:108213238:A:T	rs57719993	5	108213238	T	A	1	intron_variant	MODIFIER	FER	ENSG00000151422	protein_coding	-	8/19	-	-	-	-	-	rs57719993	-	1	Ensembl	-	-	-	-	-	0.1957	0.3048	0.183	0.0575	0.2217	0.1728	-	-	-	-
52	previously not reported*	FER	5:108210304:A:G	5	108210304	A	G	5:108213886:G:T	rs56985651	5	108213886	T	G	1	intron_variant	MODIFIER	FER	ENSG00000151422	protein_coding	-	8/19	-	-	-	-	-	rs56985651	-	1	Ensembl	-	-	-	-	-	0.1951	0.3026	0.183	0.0575	0.2217	0.1728	-	-	-	-
52	previously not reported*	FER	5:108210304:A:G	5	108210304	A	G	5:108213889:G:T	rs59821709	5	108213889	G	T	1	intron_variant	MODIFIER	FER	ENSG00000151422	protein_coding	-	8/19	-	-	-	-	-	rs59821709	-	1	Ensembl	-	-	-	-	-	0.1951	0.3026	0.183	0.0575	0.2217	0.1728	-	-	-	-
52	previously not reported*	FER	5:108210304:A:G	5	108210304	A	G	5:108215042:C:G	rs62360790	5	108215042	C	G	1	intron_variant	MODIFIER	FER	ENSG00000151422	protein_coding	-	8/19	-	-	-	-	-	rs62360790	-	1	Ensembl	-	-	-	-	-	0.1951	0.3026	0.183	0.0575	0.2217	0.1728	-	-	-	-
52	previously not reported*	FER	5:108210304:A:G	5	108210304	A	G	5:108215150:A:G	rs62360791	5	108215150	G	A	1	intron_variant	MODIFIER	FER	ENSG00000151422	protein_coding	-	8/19	-	-	-	-	-	rs62360791	-	1	Ensembl	-	-	-	-	-	0.1959	0.3056	0.183	0.0575	0.2217	0.1728	-	-	-	-
52	previously not reported*	FER	5:108210304:A:G	5	108210304	A	G	5:108215322:D:I	rs146018612	5	108215322	D	I	0.948772	intron_variant	MODIFIER	FER	ENSG00000151422	protein_coding	-	8/19	-	-	-	-	-	rs146018612	-	1	Ensembl	-	-	-	-	-	0.2119	0.354	0.1888	0.0575	0.2286	0.1779	-	-	-	-
52	previously not reported*	FER	5:108210304:A:G	5	108210304	A	G	5:108216259:G:T	rs9326751	5	108216259	T	G	1	intron_variant	MODIFIER	FER	ENSG00000151422	protein_coding	-	8/19	-	-	-	-	-	rs9326751	-	1	Ensembl	-	-	-	-	-	0.1961	0.3056	0.1844	0.0575	0.2217	0.1728	-	-	-	-
52	previously not reported*	FER	5:108210304:A:G	5	108210304	A	G	5:108218263:A:G	rs4560594	5	108218263	A	G	1	intron_variant	MODIFIER	FER	ENSG00000151422	protein_coding	-	8/19	-	-	-	-	-	rs4560594	-	1	Ensembl	-	-	-	-	-	0.1957	0.3041	0.1844	0.0575	0.2217	0.1728	-	-	-	-
52	previously not reported*	FER	5:108210304:A:G	5	108210304	A	G	5:108218524:A:T	rs4560595	5	108218524	A	T	1	intron_variant	MODIFIER	FER	ENSG00000151422	protein_coding	-	8/19	-	-	-	-	-	rs4560595	-	1	Ensembl	-	-	-	-	-	0.1965	0.3064	0.1844	0.0585	0.2217	0.1728	-	-	-	-
52	previously not reported*	FER	5:108210304:A:G	5	108210304	A	G	5:108218539:A:G	rs4358573	5	108218539	G	A	1	intron_variant	MODIFIER	FER	ENSG00000151422	protein_coding	-	8/19	-	-	-	-	-	rs4358573	-	1	Ensembl	-	-	-	-	-	0.1963	0.3056	0.1844	0.0585	0.2217	0.1728	-	-	-	-
52	previously not reported*	FER	5:108210304:A:G	5	108210304	A	G	5:108219323:D:I	rs67264931	5	108219323	I	A	0.994213	intron_variant	MODIFIER	FER	ENSG00000151422	protein_coding	-	9/19	-	-	-	-	-	rs67264931	-	1	Ensembl	-	-	-	-	-	0.1963	0.3056	0.1844	0.0575	0.2227	0.1728	-	-	-	-
52	previously not reported*	FER	5:108210304:A:G	5	108210304	A	G	5:108220116:A:G	rs9326752	5	108220116	A	G	0.994213	intron_variant	MODIFIER	FER	ENSG00000151422	protein_coding	-	9/19	-	-	-	-	-	rs9326752	-	1	Ensembl	-	-	-	-	-	0.1931	0.2935	0.1844	0.0575	0.2227	0.1728	-	-	-	-
52	previously not reported*	FER	5:108210304:A:G	5	108210304	A	G	5:108220340:C:G	rs61170909	5	108220340	C	G	0.994213	intron_variant	MODIFIER	FER	ENSG00000151422	protein_coding	-	9/19	-	-	-	-	-	rs61170909	-	1	Ensembl	-	-	-	-	-	0.1953	0.3018	0.1844	0.0575	0.2227	0.1728	-	-	-	-
52	previously not reported*	FER	5:108210304:A:G	5	108210304	A	G	5:108220732:C:G	rs62360793	5	108220732	G	C	0.994213	intron_variant	MODIFIER	FER	ENSG00000151422	protein_coding	-	9/19	-	-	-	-	-	rs62360793	-	1	Ensembl	-	-	-	-	-	0.1953	0.3018	0.1844	0.0575	0.2227	0.1728	-	-	-	-
52	previously not reported*	FER	5:108210304:A:G	5	108210304	A	G	5:108221775:A:G	rs10050490	5	108221775	A	G	0.994213	intron_variant	MODIFIER	FER	ENSG00000151422	protein_coding	-	9/19	-	-	-	-	-	rs10050490	-	1	Ensembl	-	-	-	-	-	0.1927	0.292	0.1844	0.0575	0.2227	0.1728	-	-	-	-
52	previously not reported*	FER	5:108210304:A:G	5	108210304	A	G	5:108224436:A:G	rs28612304	5	108224436	A	G	0.994213	intron_variant	MODIFIER	FER	ENSG00000151422	protein_coding	-	9/19	-	-	-	-	-	rs28612304	-	1	Ensembl	-	-	-	-	-	0.1953	0.3018	0.1844	0.0575	0.2227	0.1728	-	-	-	-
52	previously not reported*	FER	5:108210304:A:G	5	108210304	A	G	5:108224579:A:G	rs28536717	5	108224579	A	G	0.994213	intron_variant	MODIFIER	FER	ENSG00000151422	protein_coding	-	9/19	-	-	-	-	-	rs28536717	-	1	Ensembl	-	-	-	-	-	0.1961	0.3048	0.1844	0.0575	0.2227	0.1728	-	-	-	-
52	previously not reported*	FER	5:108210304:A:G	5	108210304	A	G	5:108229153:A:G	rs62360824	5	108229153	A	G	0.994213	intron_variant	MODIFIER	FER	ENSG00000151422	protein_coding	-	9/19	-	-	-	-	-	rs62360824	-	1	Ensembl	-	-	-	-	-	0.1961	0.3048	0.1844	0.0575	0.2227	0.1728	-	-	-	-
52	previously not reported*	FER	5:108210304:A:G	5	108210304	A	G	5:108230291:A:G	rs10058035	5	108230291	A	G	0.994213	intron_variant	MODIFIER	FER	ENSG00000151422	protein_coding	-	9/19	-	-	-	-	-	rs10058035	-	1	Ensembl	-	-	-	-	-	0.1927	0.292	0.1844	0.0575	0.2227	0.1728	-	-	-	-
52	previously not reported*	FER	5:108210304:A:G	5	108210304	A	G	5:108230917:G:T	rs28611371	5	108230917	G	T	0.988575	intron_variant	MODIFIER	FER	ENSG00000151422	protein_coding	-	9/19	-	-	-	-	-	rs28611371	-	1	Ensembl	-	-	-	-	-	0.1933	0.292	0.1859	0.0575	0.2237	0.1738	-	-	-	-
52	previously not reported*	FER	5:108210304:A:G	5	108210304	A	G	5:108230933:A:G	rs28521452	5	108230933	A	G	0.988575	intron_variant	MODIFIER	FER	ENSG00000151422	protein_coding	-	9/19	-	-	-	-	-	rs28521452	-	1	Ensembl	-	-	-	-	-	0.1933	0.292	0.1859	0.0575	0.2237	0.1738	-	-	-	-
52	previously not reported*	FER	5:108210304:A:G	5	108210304	A	G	5:108232077:C:T	rs62360827	5	108232077	C	T	0.994213	intron_variant	MODIFIER	FER	ENSG00000151422	protein_coding	-	9/19	-	-	-	-	-	rs62360827	-	1	Ensembl	-	-	-	-	-	0.1927	0.292	0.1844	0.0575	0.2227	0.1728	-	-	-	-
52	previously not reported*	FER	5:108210304:A:G	5	108210304	A	G	5:108233158:C:G	rs7719821	5	108233158	C	G	0.994213	intron_variant	MODIFIER	FER	ENSG00000151422	protein_coding	-	9/19	-	-	-	-	-	rs7719821	-	1	Ensembl	-	-	-	-	-	0.1939	0.295	0.1844	0.0575	0.2227	0.1748	-	-	-	-
53	previously not reported	STARD4	5:111046342:C:T	5	111046342	T	C	5:111038874:A:G	rs56130093	5	111038874	A	G	0.804411	intron_variant,non_coding_transcript_variant	MODIFIER	STARD4-AS1	ENSG00000246859	antisense	-	2/6	-	-	-	-	-	rs56130093	-	1	Ensembl	-	-	-	-	-	0.0929	0.0613	0.062	0.2093	0.0696	0.0613	-	-	-	-
53	previously not reported	STARD4	5:111046342:C:T	5	111046342	T	C	5:111040973:A:G	rs17133665	5	111040973	A	G	0.883447	intron_variant,non_coding_transcript_variant	MODIFIER	STARD4-AS1	ENSG00000246859	antisense	-	2/6	-	-	-	-	-	rs17133665	-	1	Ensembl	-	-	-	-	-	0.1008	0.0772	0.0519	0.245	0.0616	0.0593	-	-	-	-
53	previously not reported	STARD4	5:111046342:C:T	5	111046342	T	C	5:111042364:A:C	rs562288930	5	111042364	C	A	0.818646	intron_variant,non_coding_transcript_variant	MODIFIER	STARD4-AS1	ENSG00000246859	antisense	-	2/6	-	-	-	-	-	rs562288930	-	1	Ensembl	-	-	-	-	-	0.106	0.0825	0.0591	0.2401	0.0706	0.0695	-	-	-	-
53	previously not reported	STARD4	5:111046342:C:T	5	111046342	T	C	5:111046342:C:T	rs67968533	5	111046342	T	C	1	intron_variant,non_coding_transcript_variant	MODIFIER	STARD4-AS1	ENSG00000246859	antisense	-	2/6	-	-	-	-	-	rs67968533	-	1	Ensembl	-	-	-	-	-	0.111	0.1014	0.062	0.2401	0.0736	0.0644	-	-	-	-
53	previously not reported	STARD4	5:111046342:C:T	5	111046342	T	C	5:111047404:C:T	rs146239224	5	111047404	C	T	0.968048	intron_variant,non_coding_transcript_variant	MODIFIER	STARD4-AS1	ENSG00000246859	antisense	-	2/6	-	-	-	-	-	rs146239224	-	1	Ensembl	-	-	-	-	-	0.1084	0.1014	0.0548	0.2401	0.0686	0.0613	-	-	-	-
53	previously not reported	STARD4	5:111046342:C:T	5	111046342	T	C	5:111050171:A:G	rs55783613	5	111050171	A	G	0.896384	intron_variant,non_coding_transcript_variant	MODIFIER	STARD4-AS1	ENSG00000246859	antisense	-	2/6	-	-	-	-	-	rs55783613	-	1	Ensembl	-	-	-	-	-	0.1002	0.1006	0.0389	0.2401	0.0408	0.0603	-	-	-	-
53	previously not reported	STARD4	5:111046342:C:T	5	111046342	T	C	5:111056726:A:C	rs17842609	5	111056726	C	A	0.892649	intron_variant,non_coding_transcript_variant	MODIFIER	STARD4-AS1	ENSG00000246859	antisense	-	2/6	-	-	-	-	-	rs17842609	-	1	Ensembl	-	-	-	-	-	0.1002	0.1006	0.0389	0.2401	0.0408	0.0603	-	-	-	-
54	previously not reported	LOC101927421 - ZNF608	5:124343851:C:T	5	124343851	C	T	5:124341259:A:T	rs12517864	5	124341259	T	A	0.840974	intergenic_variant	MODIFIER	-	-	-	-	-	-	-	-	-	-	rs12517864	-	-	-	-	-	-	-	-	0.4487	0.3911	0.5202	0.7242	0.2177	0.4294	-	-	-	-
54	previously not reported	LOC101927421 - ZNF608	5:124343851:C:T	5	124343851	C	T	5:124342470:A:C	rs13171140	5	124342470	C	A	0.845254	intergenic_variant	MODIFIER	-	-	-	-	-	-	-	-	-	-	rs13171140	-	-	-	-	-	-	-	-	0.4479	0.3873	0.5202	0.7232	0.2197	0.4294	-	-	-	-
54	previously not reported	LOC101927421 - ZNF608	5:124343851:C:T	5	124343851	C	T	5:124343851:C:T	rs12654442	5	124343851	C	T	1	intergenic_variant	MODIFIER	-	-	-	-	-	-	-	-	-	-	rs12654442	-	-	-	-	-	-	-	-	0.4635	0.4478	0.5159	0.7242	0.2197	0.4294	-	-	-	-
54	previously not reported	LOC101927421 - ZNF608	5:124343851:C:T	5	124343851	C	T	5:124347808:A:G	rs7442952	5	124347808	G	A	0.84137	intergenic_variant	MODIFIER	-	-	-	-	-	-	-	-	-	-	rs7442952	-	-	-	-	-	-	-	-	0.4205	0.2943	0.5072	0.7173	0.2197	0.4305	-	-	-	-
54	previously not reported	LOC101927421 - ZNF608	5:124343851:C:T	5	124343851	C	T	5:124347852:C:T	rs13190341	5	124347852	T	C	0.822262	intergenic_variant	MODIFIER	-	-	-	-	-	-	-	-	-	-	rs13190341	-	-	-	-	-	-	-	-	0.4177	0.2995	0.5072	0.7183	0.2197	0.408	-	-	-	-
54	previously not reported	LOC101927421 - ZNF608	5:124343851:C:T	5	124343851	C	T	5:124348767:G:T	rs4075524	5	124348767	T	G	0.835191	intergenic_variant	MODIFIER	-	-	-	-	-	-	-	-	-	-	rs4075524	-	-	-	-	-	-	-	-	0.4225	0.3003	0.5072	0.7183	0.2197	0.4315	-	-	-	-
54	previously not reported	LOC101927421 - ZNF608	5:124343851:C:T	5	124343851	C	T	5:124350034:A:G	rs4304077	5	124350034	G	A	0.839491	intergenic_variant	MODIFIER	-	-	-	-	-	-	-	-	-	-	rs4304077	-	-	-	-	-	-	-	-	0.4217	0.2973	0.5072	0.7183	0.2197	0.4315	-	-	-	-
54	previously not reported	LOC101927421 - ZNF608	5:124343851:C:T	5	124343851	C	T	5:124351185:A:G	rs6882861	5	124351185	G	A	0.827244	intergenic_variant	MODIFIER	-	-	-	-	-	-	-	-	-	-	rs6882861	-	-	-	-	-	-	-	-	0.4247	0.2973	0.5072	0.7183	0.2197	0.4468	-	-	-	-
54	previously not reported	LOC101927421 - ZNF608	5:124343851:C:T	5	124343851	C	T	5:124351539:A:G	rs6883400	5	124351539	G	A	0.828038	intergenic_variant	MODIFIER	-	-	-	-	-	-	-	-	-	-	rs6883400	-	-	-	-	-	-	-	-	0.4245	0.2973	0.5072	0.7183	0.2197	0.4458	-	-	-	-
55	previously not reported	SLC27A6	5:128299279:C:T	5	128299279	T	C	5:128253810:C:T	rs2577476	5	128253810	T	C	0.846302	intron_variant	MODIFIER	SLC27A6	ENSG00000113396	protein_coding	-	3/6	-	-	-	-	-	rs2577476	-	1	Ensembl	-	-	-	-	-	0.6809	0.5613	0.6859	0.9187	0.6064	0.6708	-	-	-	-
55	previously not reported	SLC27A6	5:128299279:C:T	5	128299279	T	C	5:128255275:C:T	rs2577478	5	128255275	T	C	0.850258	intron_variant	MODIFIER	SLC27A6	ENSG00000113396	protein_coding	-	3/6	-	-	-	-	-	rs2577478	-	1	Ensembl	-	-	-	-	-	0.6799	0.5613	0.6816	0.9187	0.6044	0.6708	-	-	-	-
55	previously not reported	SLC27A6	5:128299279:C:T	5	128299279	T	C	5:128256587:D:I	rs2577479	5	128256587	D	I	0.955556	intron_variant	MODIFIER	SLC27A6	ENSG00000113396	protein_coding	-	3/6	-	-	-	-	-	rs2577479	-	1	Ensembl	-	-	-	-	-	-	0.4365	0.4755	0.8204	0.4026	0.4622	-	-	-	-
55	previously not reported	SLC27A6	5:128299279:C:T	5	128299279	T	C	5:128257127:C:T	rs2526259	5	128257127	C	T	0.84791	intron_variant	MODIFIER	SLC27A6	ENSG00000113396	protein_coding	-	3/6	-	-	-	-	-	rs2526259	-	1	Ensembl	-	-	-	-	-	0.6801	0.5613	0.6816	0.9187	0.6044	0.6718	-	-	-	-
55	previously not reported	SLC27A6	5:128299279:C:T	5	128299279	T	C	5:128260961:C:T	rs2577486	5	128260961	T	C	0.850886	intron_variant	MODIFIER	SLC27A6	ENSG00000113396	protein_coding	-	3/6	-	-	-	-	-	rs2577486	-	1	Ensembl	-	-	-	-	-	0.6801	0.562	0.6816	0.9187	0.6044	0.6708	-	-	-	-
55	previously not reported	SLC27A6	5:128299279:C:T	5	128299279	T	C	5:128263205:A:G	rs4068750	5	128263205	A	G	0.912328	intron_variant	MODIFIER	SLC27A6	ENSG00000113396	protein_coding	-	3/6	-	-	-	-	-	rs4068750	-	1	Ensembl	-	-	-	-	-	0.6953	0.615	0.6888	0.9187	0.6054	0.6708	-	-	-	-
[truncated: 3,273 more rows]
