# Supplementary material for: Multi-ancestry GWAS of the electrocardiographic PR interval identifies 202 loci underlying cardiac conduction
Source: Nat Commun. 2020 May 21;11:2542. doi: 10.1038/s41467-020-15706-x (PMC7242331; doi:10.1038/s41467-020-15706-x)
Supplement: Supplementary file 16 — Supplementary Data 13 [file 41467_2020_15706_MOESM16_ESM.xlsx]

## Sheet: SD13 eQTLs
Supplementary Data 13 Significant cis-eQTLs for PR interval associated variants at previously not reported (a) and previously reported loci (b).
Significant cis-eQTLs for the lead variants and conditionally independent variants or their proxies (r2>0.8) at previously not reported (a) and previously reported loci (b) from GTEx version 7 heart tissues, left ventricle (LV) and right atrial appendage (RAA). If the lead variant was significant cis-eQTL, we report the results for the lead variant. Otherwise, we report the results of the best pr…
Nearest gene: the nearest gene for the lead variant; rsID: lead variant at each locus; Chr: chromosome; Position: physical position of the variant (build 37), rsID (eQTL): rsID of the best proxy for the cis-eQTL results; Gene(eQTL): gene from cis-eQTL results; r2: linkage equilibrium r2 between the lead variant (rsID) and proxy variant(s); P: P value was estimated from a linear regression model b…
+ obtained from proxy (r2>0.8)
* conditionally independent variant within the locus
^ indicates the same proxy was used for heart tissues and spleen
‡ We set significant threshold of posterior probability (PP) of one common causal variant at PP >0.75
Red type indicates loci with eQTLs in both left ventricle and right atrial appendage samples.
$ These loci reached genome-wide significance in the European ancestry meta-analysis and were borderline genome-wide significant in the multi-ancestry meta-analysis (P<5.4×10-7).
								GTEx v7 - Left ventricle [n=272]				GTEx v7 - Right atrial Appendage [n=264]				GTEx v7 - Spleen (n=146]
Locus ID	Nearest gene	Chr	Position	rsID	rsID (eQTL)	R2	Gene (eQTL)	beta	Effect/Other Allele	P	PP‡ > 0.75	beta	Effect/Other Allele	P	PP‡ > 0.75	beta	Effect/Other Allele	P	PP‡ > 0.75
(a) previously not reported loci
2	AIM1L	1	26679041	rs12031946	-	-	TRIM63	-	-	-		-	-	-		-0.969933	C/T	1.48432e-05	3.57662e-05
4	EDN2	1	41955714	rs12751675	-	-	EDN2	0.470032	G/A	5.68214e-09	0.998274	0.547946	G/A	5.98895e-14	0.998661	-	-	-
5	SSBP3	1	54741767	rs603901	-	-	SSBP3	-0.306524	T/C	2.4646e-10	0.981414	-0.630044	T/C	5.2872e-22	0.979764	-	-	-
					-	-	MRPL37	-0.144091	T/C	1.87799e-05	0.91705	-0.23407	T/C	1.14348e-10	0.969295	-	-	-
7	CDC7	1	91966445	rs13447455	-	-	CDC7	0.200946	A/G	3.19793e-05	0.0420352	-	-	-		-	-	-
8	GJA5	1	146598683	rs112057010*	-	-	RP11-337C18.8	0.319862	A/G	1.02539e-05	0.00100458	0.339774	A/G	1.58956e-06	4.43267e-08	-	-	-
					rs72706444	0.979272	CHD1L+	0.18187	T/G	3.00131e-05	0.000643644	-	-	-		-	-	-
13	ADCK3	1	227173477	rs3768419	-	-	ADCK3	-	-	-		-	-	-		0.368772	C/G	5.16363e-07	0.958082
18	STRN	2	37102249	rs17496249	-	-	STRN	-0.146857	A/G	8.327e-09	0.0634815	-0.161414	A/G	1.29336e-05	0.828047	-	-	-
22	SPTBN1	2	54824815	rs4519566	rs11902987	0.829712	EML6+	-	-	-		-	-	-		-0.369711	C/T	3.12375e-05	0.270673
32	LSM3	3	14275759	rs6442433	-	-	SLC6A6	-	-	-		0.267112	C/G	1.1445e-05	0.935391	-	-	-
33	THRB	3	24465080	rs60325252	-	-	THRB	-0.155459	C/T	7.31306e-07	0.988117	-0.362861	C/T	7.32217e-08	0.98697	-	-	-
34	TRAK1	3	42103045	rs11921457	-	-	TRAK1	0.168177	T/G	2.4912e-06	0.977521	0.280638	T/G	1.38373e-15	0.999237	-	-	-
35	LAMB2	3	49166069	rs9865051	-	-	NCKIPSD	0.302285	T/C	2.33686e-08	0.00884078	0.182917	T/C	8.16492e-05	0.0088818	-	-	-
					-	-	WDR6	-0.265667	T/C	1.80357e-08	0.0180608	-0.329098	T/C	2.67834e-09	0.0245616	-	-	-
					-	-	QRICH1	-0.202414	T/C	7.758e-07	0.825169	-0.20556	T/C	6.39345e-05	0.632652	-0.415255	T/C	7.36809e-10	0.794641
					-	-	CCDC36	0.418653	T/C	1.03265e-05	0.609266	0.461181	T/C	1.0095e-05	0.0147284	-	-	-
					-	-	ZNF589	-	-	-		0.295723	T/C	9.57867e-05	0.000447309	-	-	-
					-	-	DALRD3	-	-	-		0.195796	T/C	0.000107382	0.6891	-	-	-
					-	-	AMT	-	-	-		0.254027	T/C	3.98868e-10	0.780338	0.549819	T/C	3.09169e-15	0.796512
					-	-	RBM6	-	-	-		0.210389	T/C	2.51869e-05	2.34127e-06	-	-	-
					rs6798112	0.91556	TMA7+	0.194566	G/A	8.04865e-05	0.0468956	-	-	-		-	-	-
					rs6446262	0.837964	RP11-3B7.1+	0.386607	C/T	7.77378e-05	0.710469	-	-	-		-	-	-
					rs6446262	0.837964	DAG1+	0.134353	C/T	3.36961e-05	0.657422	-	-	-		-	-	-
					rs7611358	0.909849	NDUFAF3+	-	-	-		0.131671	T/C	9.66788e-05	0.264163	-	-	-
					rs6446262	0.837964	GMPPB+	-	-	-		-0.289353	C/T	6.57359e-05	0.334719	-	-	-
					rs6798112	0.91556	RP11-3B7.1+	-	-	-		0.419352	G/A	7.15504e-05	0.331456	-	-	-
					rs73088137	0.835919	NICN1+	-	-	-		0.195026	G/A	0.000109155	0.593729	-	-	-
					rs6766238	0.90779	CCDC36+	-	-	-		-	-	-		0.53417	A/G	4.23773e-05	0.0245955
36	ADCY5	3	123117165	rs1000368	-	-	ADCY5	-	-	-		-0.156595	T/C	3.38373e-06	0.904601	-	-	-
39	MLF1$	3	158333891	rs6799180	-	-	MLF1	-0.347578	A/G	2.65638e-26	0.292749	-0.257618	A/G	5.56215e-16	0.843858	-	-	-
					-	-	LXN	-0.345153	A/G	7.38905e-12	0.93957	-	-	-		-	-	-
					-	-	GFM1	-	-	-		0.141552	A/G	2.06856e-06	5.79403e-05	-	-	-
47	MYOZ2$	4	120070079	rs78277783	rs56083532^	1	FABP2+	0.69217	G/C	1.20864e-11	0.0258781	0.76762	G/C	4.06155e-16	0.0258058	0.582436	G/C	1.74515e-05	0.0425092
					rs56083532^	1	MYOZ2+	-0.154809	G/C	1.68871e-06	0.943385	-	-	-		-	-	-
49	SUB1	5	32775047	rs1173743*	-	-	NPR3	-	-	-		0.174314	T/G	1.91287e-05	0.0438953	-	-	-
50	HCN1	5	45864843	rs10039283	-	-	HCN1	-	-	-		-0.226735	A/G	5.33881e-06	0.709674	-	-	-
55	SLC27A6	5	128299279	rs2577531	rs2577525	0.918718	FBN2+	-	-	-		0.350496	C/T	2.18023e-05	0.00287762	-	-	-
57	LINC01411	5	173764371	rs10035459*	rs10041519	0.955329	RP11-267A15.1+	-	-	-		-0.324556	G/A	7.34776e-07	0.918138	-	-	-
59	DEK	6	18227546	rs214502	-	-	DEK	0.193757	A/C	1.51336e-08	0.00239279	0.341948	A/C	2.25403e-22	0.978684	-	-	-
					-	-	TPMT	-	-	-		0.208978	A/C	1.21499e-06	0.5873	-	-	-
					-	-	KDM1B	-	-	-		0.209886	A/C	6.61656e-06	0.0024396	-	-	-
64	RCAN2	6	46452619	rs871728	-	-	RP11-795J1.1	-0.270575	C/T	9.84925e-06	0.937514	-	-	-		-	-	-
					-	-	SLC25A27	0.175102	C/T	4.95332e-06	7.64095e-08	-	-	-		-	-	-
					rs1881031	0.851599	SLC25A27+					0.19038	T/C	7.38696e-06	2.78059e-10	-	-	-
					-	-	TDRD6	-0.22297	C/T	1.27678e-05	2.68165e-10	-0.275066	C/T	2.60388e-06	2.78548e-10	-	-	-
					-	-	RCAN2	-	-	-		-0.173034	C/T	7.32278e-10	0.965676	-	-	-
71	DNAH11	7	21622494	rs62441680	-	-	DNAH11	-	-	-		-0.82812	C/T	3.53159e-26	0.987815	-	-	-
74	CHRM2	7	136569416	rs1424569	-	-	CHRM2	0.300534	C/T	1.50425e-22	0.999458	-	-	-		-	-	-
					-	-	hsa-mir-490	0.202655	C/T	4.3069e-06	0.984682	-	-	-		-	-	-
79	AZIN1$	8	103914366	rs565720	-	-	KB-1507C5.2	0.325394	A/C	2.58347e-05	0.872271	0.323638	A/C	3.11293e-05	0.883731	0.516535	A/C	1.40697e-05	0.798635
80	RP11-1082L8.3	8	125859817	rs35006907	-	-	MTSS1	-0.756465	A/C	1.78899e-32	0.996273	-0.288929	A/C	9.07509e-07	0.978757	-	-	-
					-	-	LINC00964	-0.362287	A/C	1.98278e-09	0.991796	-	-	-		-	-	-
85	PLPP7	9	134203545	rs4584185	-	-	PLPP7	-0.183542	C/T	1.27667e-08	0.897455	-	-	-		-	-	-
87	CCDC7	10	32847962	rs2947080	-	-	RP11-479G22.8	0.367556	G/C	2.10919e-11	5.45374e-05	0.358155	G/C	7.03426e-09	5.58471e-05	-	-	-
89	TMEM26	10	63194576	rs74813029	-	-	TMEM26	-	-	-		-	-	-		-0.561102	A/G	4.30387e-08	0.899304
95	MPPED2	11	30432176	rs553951	-	-	ARL14EP	-	-	-		-	-	-		0.521529	C/T	2.26642e-07	0.347165
					rs533407	0.965684	MPPED2+	0.234618	T/C	3.81783e-05	0.515275	-	-	-		-	-	-
98	CRYAB	11	111776066	rs12808601	-	-	C11orf1	0.206376	G/A	1.42862e-09	0.959893	0.20178	G/A	1.10765e-07	0.95883	-	-	-
108	UBE3B	12	109976893	rs2004359	-	-	MMAB	0.220371	G/T	2.1788e-05	0.655954	-	-	-		-	-	-
109	TESC	12	117491824	rs7972416	-	-	TESC	0.292439	A/G	1.89475e-09	0.935909	-	-	-		-	-	-
116	SYNE2	14	64457638	rs1255908	-	-	SYNE2	-0.19018	T/G	1.45919e-07	0.00134724	-0.209721	T/G	1.26049e-10	0.93699	-	-	-
118	RP11-1070N10.3	14	95983975	rs179145	-	-	RP11-1070N10.3	-	-	-		-0.467461	A/G	2.01533e-11	0.996154	-0.331502	A/G	1.89737e-07	0.990473
120	RBPMS2	15	65035979	rs3935716	-	-	TRIP4	0.51813	A/G	1.88001e-09	0.801012	0.600438	A/G	1.94893e-10	0.917368	-	-	-
					rs12914109	0.980849	TRIP4+	-	-	-		-	-	-		-0.3981	G/A	3.86543e-05	0.347165
123	ALPK3	15	85372645	rs6496452	-	-	ALPK3	-	-	-		0.154885	A/T	8.05382e-06	0.500142	-	-	-
					-	-	UBE2Q2L	-0.33727	A/T	2.66157e-05	9.06132e-08	-0.566472	A/T	2.60003e-11	0.465259	-	-	-
					-	-	GOLGA2P7	-0.425669	A/T	4.28188e-09	4.80661e-07	-0.52722	A/T	5.64319e-12	0.000604623	-	-	-
					-	-	WDR73	-0.322993	A/T	2.28092e-09	0.887858	-0.291925	A/T	7.48334e-08	0.922517	-	-	-
					rs10852091	0.813897	RP11-182J1.14+	0.268691	C/T	3.90085e-05	0.0225842	-	-	-		-	-	-
					-	-	LINC00933	-	-	-		0.288258	A/T	7.86248e-06	2.16109e-09	-	-	-
					-	-	CSPG4P11	-	-	-		-0.416827	A/T	1.38705e-13	0.0110234	-	-	-
					-	-	GOLGA6L4	-	-	-		-0.380702	A/T	2.98721e-06	1.01329e-12	-	-	-
126	SRL	16	4282284	rs79321945	-	-	RP11-95P2.1	-	-	-		0.343417	C/A	9.98673e-06	0.0392287	-	-	-
127	MYH11	16	15834729	rs72772025	-	-	RP11-72I8.1	-0.414738	T/C	5.55991e-06	0.000661978	-	-	-		-	-	-
					-	-	NPIPA5	0.424094	T/C	2.80725e-05	0.997626	-	-	-		-	-	-
					-	-	AF001548.5	-	-	-		-0.422668	T/C	3.10139e-07	0.0316512	-	-	-
129	CNOT1	16	58584772	rs7199856	-	-	NDRG4	0.214027	G/T	3.72525e-08	0.913626	-	-	-		-	-	-
					-	-	SETD6	-0.345259	G/T	1.25938e-09	0.000127351	-	-	-		-	-	-
133	EFCAB5	17	28312993	rs55866125	-	-	EFCAB5	-	-	-		-	-	-		-0.535449	T/C	8.85004e-07	0.52147
134	CACNA1G	17	48666064	rs757416	rs757414	0.948289	SPATA20+	-0.252488	C/T	2.26449e-05	4.39429e-09	-	-	-
135	CSHL1	17	61987405	rs2006122	-	-	MAP3K3	0.176036	T/A	2.1363e-05	0.812815	-	-	-		0.310843	T/A	4.39339e-06	0.866479
					-	-	DDX42	-0.168859	T/A	1.26919e-05	0.829414	-	-	-		-	-	-
					-	-	FTSJ3	0.304247	T/A	2.17005e-08	0.000243198	0.356614	T/A	5.42921e-13	0.000245422	-	-	-
					rs2727293	0.828957	DDX42+	-	-	-		-0.161679	C/G	4.74285e-05	0.568761	-	-	-
					rs2727293	0.828957	FTSJ3+	-	-	-						0.400839	C/G	2.72145e-05	0.000250962
136	PRKCA	17	64306133	rs9909004	-	-	PRKCA	-0.609585	C/T	6.79361e-35	0.97191	-0.386903	C/T	5.10362e-09	0.963143	-	-	-
138	AC100791.2	17	77781725	rs745570	-	-	CBX8	-0.303296	G/A	1.75945e-07	0.989298	-0.31218	G/A	2.67548e-08		-	-	-
140	GAREM	18	30029141	rs982521	rs13380944	0.822687	GAREM+	-	-	-		-0.359146	G/A	3.46658e-06	0.541296	-	-	-
144	ZNF358	19	7581244	rs113394178	-	-	ZNF358	-	-	-		-0.18279	A/C	8.53478e-08	0.970794	-	-	-
148	DERL3	22	24183875	rs2070464	-	-	KB-208E9.1	-	-	-		-0.421981	G/A	1.18055e-06	1.27797e-10	-	-	-
149	PHF5A	22	41854446	rs9607805	-	-	MEI1	-0.323156	T/C	5.65108e-05	0.327445	-0.367883	T/C	7.48453e-08	0.485659	-	-	-
					rs9611591	0.84734	MEI1+	-	-	-						-0.305967	A/G	1.18954e-05	0.323978
					rs9611591	0.84734	L3MBTL2+	-	-	-		-0.185265	A/G	7.74812e-05	0.769899
(b) previously reported loci
1	SKI	1	2144107	rs2503715	-	-	AL590822.1	-	-	-		0.417647	G/A	4.19785e-06	0.927971	-	-	-
2	MACF1	1	39654372	rs57214150	rs16837533	0.846574	OXCT2P1+	0.365117	A/G	1.6842e-06	0.0307518	-	-	-		-	-	-
					rs3768302	0.952634	OXCT2P1+	-	-	-		0.359599	G/T	2.97779e-05	6.16101e-07	-	-	-
					rs41270821	0.874496	RP11-69E11.4+	0.249831	C/T	1.99136e-05	0.00411426	-	-	-		-	-	-
					rs61783378	0.963454	OXCT2P1+	-	-	-		-	-	-		0.589814	A/G	1.26122e-05	0.00700677
6	KRTCAP2	1	155142927	rs4971089	-	-	GBAP1	0.383232	A/G	1.09587e-16	1.87936e-07	0.346762	A/G	1.03845e-16	0.000687315	0.613606	A/G	1.23471e-16	2.04953e-07
					-	-	EFNA1	0.190924	A/G	4.90668e-06	0.945571	-	-	-		-	-	-
					-	-	GBA	0.199211	A/G	1.19867e-05	0.693735	-	-	-		-	-	-
					-	-	THBS3	-	-	-		-	-	-		-0.338406	A/G	1.1753e-07	2.91493e-05
11	TMEM182	2	103415494	rs2732814	-	-	TMEM182	-	-	-		0.16783	A/G	2.17758e-09	0.961257	-	-	-
			103426177	rs2540277*	-	-	TMEM182	0.260505	C/T	1.50052e-07	0.0498873	-	-	-		-	-	-
13	TTN/CCDC141	2	179558366	rs2042995	rs2472751	0.944126	FKBP7+	-	-	-		0.17259	A/C	2.88903e-05	7.44157e-05	-	-	-
15	SCN5A/SCN10A	3	38524363	rs503327*	-	-	VILL	-	-	-		-0.279148	T/C	4.44532e-05	0.00013507	-	-	-
16	DCP1A/CACNA1D	3	53770588	rs6800641	-	-	CHDH	-0.194079	G/A	3.09786e-05	0.649941	-	-	-		-	-	-
17	SLC25A26	3	66362206	rs1084537	-	-	SLC25A26	0.310146	T/C	1.98422e-15	0.00532057	0.253859	T/C	3.12386e-07	0.00211233	-	-	-
20	PDZRN3	3	73554922	rs4677294	-	-	PDZRN3-AS1	0.153445	T/A	1.62046e-05	0.948219	0.276916	T/A	5.94808e-13	0.963405	-	-	-
					-	-	PDZRN3	0.211684	T/A	3.14154e-14	0.921233	0.34517	T/A	6.86536e-20	0.980076	-	-	-
29	FAT1	4	187623099	rs74772720	-	-	FAT1	0.202571	A/C	8.00643e-07	0.976144	0.274051	A/C	4.47512e-07	0.652004	-	-	-
34	SLC35F1	6	118667522	rs11153730	-	-	SSXP10	-	-	-		-0.446643	T/C	5.61728e-09	0.00108271	-	-	-
					rs1334489	0.874033	SSXP10+	-0.258525	T/A	4.21505e-05	0.827202	-	-	-		-	-	-
35	GJA1	6	123738460	rs35299721*	rs6924568	1	RP11-532N4.2+	-	-	-		0.435764	C/T	2.45533e-05	0.0496091	-	-	-
36	TBX20/HERPUD2	7	35412363	rs340397	-	-	RP11-379H18.1	-	-	-		0.180887	T/G	7.12102e-06	3.36e-10	-	-	-
39	FGFR1	8	38332249	rs881299	rs10958704	0.904129	FGFR1+	-	-	-		-	-	-		0.279334	G/A	1.60875e-05	0.935689
42	PLEC	8	145018354	rs11786896	-	-	PLEC	-0.705629	T/C	5.94363e-13	0.982276	-0.556659	T/C	8.1894e-06	0.000820494	-	-	-
44	SYNPO2L	10	75421446	rs7394152	-	-	FUT11	0.303566	C/T	8.80666e-06	1.03617e-06	-	-	-		-	-	-
					-	-	MYOZ1	-	-	-		-1.0923	C/T	1.08587e-29	0.983525	-	-	-
					-	-	DUSP8P5	-	-	-		-0.3058	C/T	3.47092e-05	0.757899	-	-	-
					rs7915134	0.804027	SYNPO2L+	-	-	-		0.175966	C/T	2.46018e-05	0.6052	-	-	-
			76847993	rs2395137*	-	-	DUPD1	0.368	G/C	2.94357e-07	0.000435372	-	-	-		-	-	-
					-	-	VDAC2	0.132811	G/C	4.32797e-06	0.956374	-	-	-		-	-	-
					-	-	RP11-399K21.11	-	-	-		0.306775	G/C	3.91995e-05	0.0804799	-	-	-
					-	-	ZNF503-AS1	-	-	-		0.521882	G/C	4.4647e-11	0.00180207	-	-	-
45	ALDH18A1/SORBS1	10	97388579	rs10882644	-	-	TCTN3	0.216334	T/C	3.77698e-07	0.00157487	0.295784	T/C	2.56089e-13	0.00565008	-	-	-
					rs7073010	0.916569	ENTPD1+	-	-	-		-	-	-		0.368901	T/C	1.73492e-05	3.09763e-11
46	SH3PXD2A/OBFC1	10	105614754	rs762032*	-	-	SH3PXD2A	-0.427741	G/T	2.99724e-05	0.35134	-	-	-
48	FADS1/FADS2	11	61602458	rs138766446	rs2524296	0.949667	FADS1+	0.318701	C/T	3.95277e-07	0.853494	-	-	-
49	WNT11	11	75915139	rs94111	-	-	WNT11	-	-	-		-	-	-		-0.447683	G/A	1.42371e-06	0.829425
52	XPO4/EFHA1	13	21386229	rs2013546*	-	-	IL17D	-0.32218	A/G	4.35783e-06	0.0086465	-	-	-
					rs1966190	0.877075	XPO4+	-	-	-		-	-	-		-0.293422	C/A	1.0746e-05	0.0251962
			21444538	rs11147883*	rs4770077	0.946119	IFT88+	0.24736	A/G	2.11682e-05	1.14489e-10	-	-	-		-	-	-
					rs2585891	0.953955	SLC35E1P1+	-	-	-		0.399617	C/T	1.39213e-05	2.03943e-07	-	-	-
53	LRCH1	13	47244162	rs4245338	-	-	LRCH1	0.355924	G/A	3.45117e-14	0.93619	-	-	-		-	-	-
54	CAB39L	13	49918175	rs35214871	-	-	CAB39L	-0.485432	T/G	2.38899e-10	0.998231	-0.353606	T/G	6.30036e-07	0.983563	-	-	-
60	CDH13	16	82754425	rs12443745	-	-	CDH13	0.543837	C/G	2.62579e-16	0.988405	0.57463	C/G	2.41334e-11	0.99006	-	-	-
62	TOP1	20	40066117	rs2179452	rs4812519	0.851274	RP1-1J6.2+	-0.247953	G/C	6.31818e-06	0.341981	-	-	-		-	-	-
