# Supplementary material for: Multi-ancestry GWAS of the electrocardiographic PR interval identifies 202 loci underlying cardiac conduction
Source: Nat Commun. 2020 May 21;11:2542. doi: 10.1038/s41467-020-15706-x (PMC7242331; doi:10.1038/s41467-020-15706-x)
Supplement: Supplementary file 17 — Supplementary Data 14 [file 41467_2020_15706_MOESM17_ESM.xlsx]

## Sheet: SD14 S-PrediXcan
Supplementary Data 14 Significant S-PrediXcan results for associations between gene expressions in heart tissues (left ventricle and right atrial appendage) and PR interval at previously not reported (a) and previously reported loci (b), and ≥ 500kb away from lead variants (c).
*Significance was defined as P=3.1x10-6 (=0.05/( 5,366 genes from left ventricle + 5,977 genes from right atrial appendage + 4,598 genes from spleen)), after accounting for multiple testing.
Genotypes (variants with minor allele frequency > 0.01) and normalized expression data in individuals of European ancestry in atrial appendage, left ventricle, and spleen from GTEx v7 used as the training datasets for the prediction models were provided by the software developers. We used our summary data from European only meta-analysis with at least 60% sample sizes were as study dataset to est…
N = 233 for left ventricle, N = 231 for right atrial appendage and N = 119 for spleen.
			Left ventricle				Right atrial appendage				Spleen
Locus ID	chromosome	gene name	effect size	P	# variants used	H4>0.75	effect size	P	# variants used	H4>0.75	effect size	P	# variants used	H4>0.75	Lead variant in the locus	Nearest gene to the lead variant
(a) previously not reported loci
4	1	EDN2	2.55442	1.71642e-12	2	0.998274	1.18502	2.21258e-12	15	0.998661	-	-	-	-	rs12751675	EDN2
5	1	SSBP3	-1.08778	1.06386e-08	15	0.981414	-0.73357	5.42195e-09	13	0.979764	-	-	-	-	rs603901	SSBP3
5	1	MRPL37	-	-	-	-	-0.818329	3.05036e-07	21	0.969295	-	-	-	-	rs603901	SSBP3
8	1	ACP6	0.384542	2.25313e-08	69	1.23439e-07	-	-	-	-	0.455559	1.14132e-06	28	1.05472e-07	rs1692144	GJA5 - GJA8
13	1	ADCK3	-	-	-	-	-	-	-	-	1.14541	1.59241e-08	29	0.958082	rs3768419	ADCK3
18	2	STRN	-1.63411	4.13555e-19	20	0.0634815	-	-	-	-	-	-	-	-	rs17496249	STRN
22	2	SPTBN1	-	-	-	-	-2.08358	1.00087e-08	4	0.588509	-	-	-	-	rs4519566	SPTBN1
22	2	EML6	-	-	-	-	-	-	-	-	-1.09037	3.10836e-07	19	0.270673	rs4519566	SPTBN1
32	3	SLC6A6	-	-	-	-	5.37526	3.15915e-17	3	0.935391	-	-	-	-	rs6442433	LSM3
33	3	THRB	-	-	-	-	-2.34557	1.80267e-21	19	0.98697	-	-	-	-	rs60325252	THRB
34	3	TRAK1	-	-	-	-	1.76536	2.65986e-13	18	0.999237	-	-	-	-	rs11921457	TRAK1
35	3	ARIH2	-	-	-	-	-	-	-	-	1.2098	2.51424e-06	37	0.0477699	rs9865051	LAMB2
35	3	RP11-3B7.1	0.94727	1.84596e-06	52	0.710469	-	-	-	-	-	-	-	-	rs9865051	LAMB2
35	3	DAG1	1.06655	5.99204e-07	23	0.657422	-	-	-	-	-	-	-	-	rs9865051	LAMB2
35	3	AMT	-	-	-	-	-	-	-	-	0.274606	2.94862e-06	90	0.796512	rs9865051	LAMB2
35	3	QRICH1	-1.09771	9.23835e-08	15	0.825169	-	-	-	-	-0.420345	2.92171e-06	47	0.794641	rs9865051	LAMB2
35	3	CCDC36	0.818819	1.17651e-07	42	0.609266	-	-	-	-	-	-	-	-	rs9865051	LAMB2
39	3	MLF1	-0.444583	3.61174e-07	43	0.292749	-0.585762	1.37193e-07	32	0.843858	-	-	-	-	rs6799180	MLF1 - GFM1
39	3	RP11-379F4.7	-6.11516	2.40755e-06	2	0.56	-	-	-	-	-	-	-	-	rs6799180	MLF1 - GFM1
39	3	RSRC1	-	-	-	-	-	-	-	-	1.06484	1.94441e-11	29	0.0479843	rs6799180	MLF1 - GFM1
48	5	ZDHHC11	-	-	-	-	-	-	-	-	-0.946848	1.02175e-06	29	0.0502069	rs4975572	SLC12A7
48	5	SLC12A7	-	-	-	-	-	-	-	-	-0.607079	2.11459e-08	23	9.79614e-10	rs4975572	SLC12A7
50	5	HCN1	-	-	-	-	-2.74849	3.68953e-17	26	0.709674	-	-	-	-	rs10039283	HCN1
59	6	KDM1B	-	-	-	-	1.78411	1.42993e-09	8	0.0024396	-	-	-	-	rs214502	DEK
59	6	DEK	1.22299	2.09008e-10	9	0.00239279	0.579959	4.24186e-09	38	0.978684	-	-	-	-	rs214502	DEK
59	6	TPMT	-	-	-	-	1.12319	1.18981e-07	18	0.5873	-	-	-	-	rs214502	DEK
64	6	RCAN2	-	-	-	-	-1.98277	3.49772e-14	18	0.965676	-	-	-	-	rs871728	RCAN2
71	7	DNAH11	-	-	-	-	-0.495721	5.06525e-09	34	0.987815	-	-	-	-	rs62441680	DNAH11
74	7	CHRM2	0.70694	3.83941e-07	6	0.999458	-	-	-	-	-	-	-	-	rs1424569	CHRM2
80	8	LINC00964	-0.721343	1.12586e-08	37	0.991796	-	-	-	-	-	-	-	-	rs35006907	RP11-1082L8.3
80	8	MTSS1	-0.666821	3.8905e-12	13	0.996273	-2.60747	8.92353e-11	7	0.978757	-	-	-	-	rs35006907	RP11-1082L8.3
85	9	PPAPDC3	-1.00875	7.46639e-10	28	0.897455	-1.91445	1.73516e-09	18	0.787302	-	-	-	-	rs4584185	PLPP7
86	10	BEND7	-	-	-	-	-1.79982	6.92987e-07	13	0.530903	-	-	-	-	rs7916672	BEND7
88	10	CEFIP	1.5749	2.98872e-06	14	0.133815	-	-	-	-	-	-	-	-	rs10776558	CEFIP
91	10	ZCCHC24	0.974209	2.12749e-06	23	0.595243	-	-	-	-	-	-	-	-	rs1769758	ZMIZ1
92	10	BMPR1A	0.935735	1.58254e-07	49	0.157887	0.616115	1.13263e-06	23	1.95758e-09	-	-	-	-	rs117443987	U3
97	11	MALAT1	-	-	-	-	-1.43864	1.37289e-06	19	0.0542478	-	-	-	-	rs12801636	PCNXL3
98	11	C11orf1	1.15274	6.39452e-11	22	0.959893	1.0991	8.43164e-11	24	0.95883	-	-	-	-	rs12808601	CRYAB
108	12	UBE3B	-	-	-	-	-1.19168	4.1577e-11	9	0.640868	-	-	-	-	rs2004359	UBE3B
116	14	SYNE2	-1.08633	2.50153e-11	26	0.00134724	-1.10346	2.05566e-12	20	0.93699	-	-	-	-	rs1255908	SYNE2
118	14	RP11-1070N10.3	-	-	-	-	-1.08081	1.49338e-08	18	0.996154	-1.3945	5.49826e-10	8	0.990473	rs179145	RP11-1070N10.3
120	15	TRIP4	1.28545	1.60866e-09	21	0.801012	0.950704	1.94129e-07	42	0.917368	-	-	-	-	rs3935716	RBPMS2
123	15	WDR73	-0.911261	3.07952e-11	31	0.887858	-1.1143	1.54764e-09	38	0.922517	-	-	-	-	rs6496452	ALPK3
123	15	AC103965.1	-0.397001	1.44595e-07	55	4.81e-07	-0.418829	3.31276e-07	38	0.000604623	-0.610042	4.91657e-11	40	0.0173974	rs6496452	ALPK3
123	15	ALPK3	-	-	-	-	1.65626	5.44548e-11	13	0.500142	-	-	-	-	rs6496452	ALPK3
123	15	DNM1P51	-	-	-	-	2.10011	2.71828e-06	15	0.0359696	-	-	-	-	rs6496452	ALPK3
127	16	NPIPA5	-	-	-	-	0.448978	1.41437e-06	33	0.997636	-	-	-	-	rs72772025	MYH11
132	17	CAMTA2	-	-	-	-	-	-	-	-	0.808107	1.33857e-07	19	0.548571	rs7774	MINK1
133	17	EFCAB5	-	-	-	-	-	-	-	-	-0.568239	1.57166e-07	48	0.52147	rs55866125	EFCAB5
134	17	SPATA20	-0.466795	9.19056e-12	33	4.39429e-09	-0.44231	9.33081e-11	34	4.39429e-09	-0.507528	8.37027e-13	20	4.39429e-09	rs757416	CACNA1G
135	17	DDX42	-	-	-	-	-1.2239	5.86623e-08	48	0.568761	-	-	-	-	rs2006122	CSHL1
138	17	CBX8	-	-	-	-	-1.46774	5.71076e-07	3	0.990442	-	-	-	-	rs745570	AC100791.2
143	19	ATP5D	-	-	-	-	2.83773	9.08528e-08	4	0.352292	-	-	-	-	rs3795063	STK11
148	22	SMARCB1	-0.841926	2.91766e-11	44	0.747954	-1.04059	2.66104e-14	43	0.744636	-	-	-	-	rs2070464	DERL3
148	22	VPREB3	-	-	-	-	1.65226	1.58194e-09	11	0.74924	-	-	-	-	rs2070464	DERL3
148	22	MMP11	-0.737345	5.38576e-10	63	0.00543345	-1.29784	3.76455e-09	23	0.778675	-	-	-	-	rs2070464	DERL3
148	22	SLC2A11	-0.572619	2.33795e-06	41	0.0117673	-	-	-	-	-	-	-	-	rs2070464	DERL3
(b) previously reported loci
1	1	AL590822.1	-	-	-	-	2.02192	2.09899e-15	21	0.927971	-	-	-		rs2503715	SKI
1	1	C1orf86	-0.519421	1.77538e-07	76	1.95e-12	-0.499643	1.32763e-06	46	1.16372e-13	-0.98226	2.15899e-13	17	0.000387034	rs2503715	SKI
2	1	PABPC4	-	-	-	-	-	-	-	-	-0.484662	1.58057e-06	54	0.384371	rs57214150	MACF1
2	1	OXCT2P1	-	-	-	-	-	-	-	-	0.973516	1.90987e-07	23	0.00700677	rs57214150	MACF1
4	1	MYBPHL	-	-	-	-	-0.693763	1.13897e-06	39	0.000154533	-	-	-	-	rs34573869	MYBPHL
4	1	SYPL2	-0.554211	1.34401e-08	23	0.000157285	-0.505813	2.28168e-08	36	0.996411	-	-	-	-	rs34573869	MYBPHL
5	1	KCND3	1.12907	4.92137e-20	71	0.0400801	1.72813	3.55191e-12	34	0.0519859	-	-	-	-	rs116532272	KCND3
6	1	THBS3	-	-	-	-	-	-	-	-	-0.651204	1.70795e-13	52	2.91493e-05	rs4971089	KRTCAP2
6	1	EFNA1	2.54252	1.59788e-20	8	0.945571	-	-	-	-	-	-	-	-	rs4971089	KRTCAP2
6	1	GBAP1	0.776362	2.10862e-16	13	1.88e-07	1.38033	2.56677e-19	17	0.000687315	0.678005	7.09859e-18	13	2.04953e-07	rs4971089	KRTCAP2
6	1	RP11-29H23.5	3.02747	5.90102e-08	10	0.0331456	-	-	-	-	-	-	-	-	rs4971089	KRTCAP2
6	1	RP11-29H23.6	-	-	-	-	-	-	-	-	-0.985	1.97567e-09	14	-	rs4971089	KRTCAP2
6	1	MSTO2P	1.76878	3.94663e-08	7	0.00414043	-	-	-	-	-	-	-	-	rs4971089	KRTCAP2
6	1	FDPS	-	-	-	-	-	-	-	-	-2.31766	1.18131e-09	9	0.0400478	rs4971089	KRTCAP2
8	2	LINC00299	-	-	-	-	-	-	-	-	-0.932701	3.10092e-06	7	0.19055	rs6730558	ID2
8	2	AC011747.4	-	-	-	-	-3.78907	1.60428e-24	20	0.0320146	-	-	-	-	rs6730558	ID2
11	2	TMEM182	2.42193	7.63393e-26	15	0.0498873	1.61962	4.47299e-28	51	0.961257	-	-	-	-	rs2732814	TMEM182
13	2	FKBP7	0.897165	1.62255e-07	16	3.03174e-05	0.81148	1.84902e-12	62	7.44157e-05	-	-	-	-	rs2042995	TTN/ CCDC141
15	3	SCN5A	-	-	-	-	-6.27908	8.6862e-229	38	0.121568	-3.81209	2.46185e-99	8	9.79696e-05	rs6801957	SCN5A/ SCN10A
15	3	GORASP1	-	-	-	-	-2.43756	2.41489e-13	27	0.0314221	-	-	-	-	rs6801957	SCN5A/ SCN10A
15	3	SCN10A	-14.3821	1.24218e-268	2	0.72157	-	-	-	-	-	-	-	-	rs6801957	SCN5A/ SCN10A
15	3	XIRP1	-	-	-	-	2.97864	4.03631e-93	57	0.174719	-	-	-	-	rs6801957	SCN5A/ SCN10A
17	3	SLC25A26	0.551339	9.14936e-09	27	0.00532057	0.730063	1.37448e-06	23	0.00211233	-	-	-	-	rs1084537	SLC25A26
20	3	PDZRN3	1.52099	1.78455e-30	9	0.921233	1.27534	4.59645e-33	22	0.980076	-	-	-	-	rs4677294	PDZRN3
21	3	PHLDB2	-1.7674	1.73183e-07	14	0.434527	-	-	-	-	-	-	-	-	rs2137897	PHLDB2
26	4	RP11-397E7.4	-1.79391	6.18023e-11	35	0.102632	-	-	-	-	-	-	-	-	rs442177	AFF1
27	4	CAMK2D	0.909544	2.31467e-08	57	0.12097	-	-	-	-	-	-	-	-	rs4834347	CAMK2D
29	4	FAT1	1.0398	1.65176e-06	36	0.976144	2.69925	3.82091e-12	6	0.652004	-	-	-	-	rs74772720	FAT1
32	5	BNIP1	-	-	-	-	-	-	-	-	-1.47741	9.19058e-12	32	0.291897	rs29795	NKX2-5/ ATP6V0E1/ C5orf41/ BNIP1/ CREBRF
34	6	SSXP10	-	-	-	-	-1.30506	1.11297e-22	67	0.00108271	-	-	-	-	rs11153730	SLC35F1
37	7	TFEC	-2.35693	4.91101e-24	30	0.316394	-	-	-	-	-	-	-	-	rs3807989	CAV1/ CAV2
41	8	ZHX1	-4.247	2.52621e-06	2	0.0486311	-	-	-	-	-	-	-	-	rs4871397	KLHL38
44	10	NDST2	-	-	-	-	-1.89056	1.29935e-09	20	0.225418	-	-	-	-	rs7394152	SYNPO2L
44	10	FUT11	1.01274	1.45849e-06	12	1.03617e-06	-	-	-	-	0.689926	2.74748e-09	36	0.00296934	rs7394152	SYNPO2L
44	10	MYOZ1	-	-	-	-	-0.670016	7.05279e-20	25	0.983525	-	-	-	-	rs7394152	SYNPO2L
44	10	SYNPO2L	-	-	-	-	2.13085	5.49827e-15	17	0.6052	-	-	-	-	rs7394152	SYNPO2L
44	10	TTC18	0.798581	3.91599e-07	79	5.43899e-07	-	-	-	-	-	-	-	-	rs7394152	SYNPO2L
44	10	AGAP5	-	-	-	-	-2.1867	5.43828e-10	5	0.437012	-	-	-	-	rs7394152	SYNPO2L
45	10	ENTPD1	-	-	-	-	-	-	-	-	0.874879	1.03021e-10	34	3.09763e-11	rs10882644	ALDH18A1/ SORBS1
45	10	TCTN3	0.498156	4.11738e-07	70	0.00157487	1.03596	2.8459e-19	61	0.00565008	1.65851	2.72019e-21	35	0.0114274	rs10882644	ALDH18A1/ SORBS1
46	10	SH3PXD2A	-2.11282	1.13844e-21	30	0.35134	-	-	-	-	-	-	-	-	rs10883908	SH3PXD2A/ OBFC1
46	10	CALHM2	2.73945	9.80876e-13	6	0.0336665	1.14702	1.58251e-07	11	0.00981357	-	-	-	-	rs10883908	SH3PXD2A/ OBFC1
46	10	NEURL	-	-	-	-	-2.13592	2.09569e-06	6	0.158125	-	-	-	-	rs10883908	SH3PXD2A/ OBFC1
46	10	SLK	-	-	-	-	1.04931	2.30858e-11	49	0.0106053	-	-	-	-	rs10883908	SH3PXD2A/ OBFC1
48	11	FADS1	1.72888	3.28209e-10	13	0.853494	-	-	-	-	-	-	-	-	rs138766446	FADS1/FADS2
53	13	LRCH1	1.21415	1.75814e-22	28	0.93619	-	-	-	-	-	-	-	-	rs4245338	LRCH1
54	13	KPNA3	-	-	-	-	-1.58425	1.91118e-10	27	0.0217045	-	-	-	-	rs35214871	CAB39L
54	13	CAB39L	-1.39854	1.67938e-11	18	0.998231	-	-	-	-	-	-	-	-	rs35214871	CAB39L
56	14	IL25	-	-	-	-	-2.8129	1.53029e-08	8	0.0521726	-	-	-	-	rs2754171	IL25/ MYH6
56	14	CMTM5	-	-	-	-	-1.06148	1.39835e-06	22	0.00397273	-	-	-	-	rs2754171	IL25/ MYH6
60	16	CDH13	1.24772	1.30002e-12	16	0.988405	0.795235	2.72372e-09	31	0.99006	-	-	-	-	rs12443745	CDH13
62	20	PLCG1	-	-	-	-	-	-	-	-	-0.662734	1.7449e-06	35	0.124402	rs2179452	TOP1
(c) ≥ 500kb away from lead variants
	3	RPSA	1.606	9.17743e-14	14	1.41093e-05	-	-	-	-	-	-	-	-	-	-
	3	PLCD1	-3.07564	2.60036e-28	13	0.0302642	-	-	-	-	-	-	-	-	-	-
	3	IFRD2	1.70811	8.73426e-07	10	0.0380443	-	-	-	-	-	-	-	-	-	-
	5	EMB	-1.05327	4.03862e-11	91	0.0955634	-3.91935	1.30619e-06	7	0.0543699	-	-	-	-	-	-
	6	PHACTR1	-	-	-	-	0.979403	2.07787e-07	24	0.84825	-	-	-	-	-	-
	10	RP11-344N10.5	-3.50092	2.83355e-11	2	0.301753	-	-	-	-	-0.975226	1.85864e-07	14	0.0344143	-	-
	10	HMGA1P5	-	-	-	-	1.13767	5.67409e-09	9	-	-	-	-	-	-	-
	10	GBF1	-	-	-	-	-3.17023	2.75254e-10	4	0.0422648	-	-	-	-	-	-
	10	VDAC2	3.93763	7.12513e-11	5	0.956374	-	-	-	-	-	-	-	-	-	-
	10	NUDT13	-	-	-	-	0.600358	1.18261e-06	143	4.66045e-11	-	-	-	-	-	-
	10	RP11-399K21.11	-	-	-	-	1.0956	5.56218e-07	18	0.0804799	-	-	-	-	-	-
	10	RP11-724N1.1	-	-	-	-	-0.966142	2.03505e-09	38	-	-	-	-	-	-	-
	10	ZNF503-AS1	0.741472	1.14481e-09	24	0.00164205	0.513518	1.86422e-09	28	0.00180207	-	-	-	-	-	-
	13	IL17D	-3.00082	7.17525e-26	16	0.0086465	-	-	-	-	-	-	-	-	-	-
	15	RP11-182J1.16	-	-	-	-	-0.618148	2.87145e-09	27	0.465259	-	-	-	-	-	-
	15	SNX1	-	-	-	-	1.40664	8.93927e-07	9	0.0356732	-	-	-	-	-	-
	15	CSPG4P11	-0.865674	1.59232e-07	20	2.42339e-05	-0.83875	5.8576e-11	32	0.0110234	-2.05618	2.25056e-10	12	0.259006	-	-
	16	CFDP1	-	-	-	-	1.09925	3.12593e-07	14	0.962827	-	-	-		-	-
	16	BCAR1	-	-	-	-	-	-	-	-	-1.34881	8.3594e-07	20	0.427531	-	-
	16	NPIPA1	-0.408261	2.6206e-06	57	0.997437	-	-	-	-	-	-	-	-	-	-
	17	MYO15A	1.59874	9.88666e-07	19	0.935418	-	-	-	-	-	-	-	-	-	-
	20	RP4-764O22.2	1.16778	1.10188e-06	30	-	-	-	-	-	-	-	-	-	-	-
	22	FAM211B	-	-	-	-	1.76341	4.04161e-07	15	0.279426	-	-	-	-	-	-
