# Supplementary material for: Multi-ancestry GWAS of the electrocardiographic PR interval identifies 202 loci underlying cardiac conduction
Source: Nat Commun. 2020 May 21;11:2542. doi: 10.1038/s41467-020-15706-x (PMC7242331; doi:10.1038/s41467-020-15706-x)
Supplement: Supplementary file 18 — Supplementary Data 15 [file 41467_2020_15706_MOESM18_ESM.xlsx]

## Sheet: SD15 HaploReg Annotations
Supplementary Data 15 Chromatin states and DNase hypersensitivity sites of lead and conditionally independent variants and their proxies (r2>0.8) at all PR interval associated loci from Roadmap Epigenomics across all tissues and heart tissues.
Heart tissues we assessed included fetal heart (E083), left ventricle (E095), right atrium (E104), right ventricle (E105).
Position, base pair position in build 37; R2, r-squared between the lead or conditionally independent variant and the proxy variant.
* These loci reached genome-wide significance in the European ancestry meta-analysis and were borderline genome-wide significant in the multi-ancestry meta-analysis (P<5.4×10-7).
			Lead or conditionally independent variant						Proxy variant
Locus ID	Type	Nearest gene to the lead variant in the locus or previously reported gene	MarkerName	rsID	Chromosome	Position	Allele1	Allele2	MarkerName	rsID	Chromosome	Position	Allele1	Allele2	R2	Chromatin States - All Tissues	Chromatin States - Heart Tissues	DNAse	DNAse - Fetal Heart
1	previously not reported	HSPG2	1:22282619:C:T	rs10917070	1	22282619	T	C	1:22278790:A:G		1	22278790	G	A	0.873752			E123
1	previously not reported	HSPG2	1:22282619:C:T	rs7529220	1	22282619	T	C	1:22279191:A:G	rs7354857	1	22279191	A	G	0.873752	E007,7_Enh;E012,7_Enh;E055,12_EnhBiv;E089,7_Enh;E090,7_Enh;E121,7_Enh
1	previously not reported	HSPG2	1:22282619:C:T	rs7529220	1	22282619	T	C	1:22279280:A:C	rs7355161	1	22279280	C	A	0.872715	E003,7_Enh;E007,7_Enh;E009,7_Enh;E010,12_EnhBiv;E012,7_Enh;E019,7_Enh;E024,7_Enh;E049,7_Enh;E055,12_EnhBiv;E089,7_Enh;E090,7_Enh;E121,7_Enh
1	previously not reported	HSPG2	1:22282619:C:T	rs7529220	1	22282619	T	C	1:22280382:C:T	rs6426729	1	22280382	T	C	0.873752	E090,7_Enh
1	previously not reported	HSPG2	1:22282619:C:T	rs7529220	1	22282619	T	C	1:22281393:A:G	rs7533718	1	22281393	G	A	0.863299	E063,7_Enh;E090,7_Enh;E107,7_Enh
1	previously not reported	HSPG2	1:22282619:C:T	rs10917072	1	22282619	T	C	1:22281664:A:G		1	22281664	G	A	0.873891			E089;E121
1	previously not reported	HSPG2	1:22282619:C:T	rs10917073	1	22282619	T	C	1:22281690:A:G		1	22281690	A	G	0.871305			E089;E090;E121
1	previously not reported	HSPG2	1:22282619:C:T	rs7529220	1	22282619	T	C	1:22281718:A:T	rs12140171	1	22281718	T	A	0.873891	E001,7_Enh;E006,7_Enh;E025,7_Enh;E034,7_Enh;E063,7_Enh;E080,7_Enh;E089,7_Enh;E090,7_Enh;E091,7_Enh;E107,7_Enh;E113,7_Enh;E118,11_BivFlnk		E089;E090;E121;E126
1	previously not reported	HSPG2	1:22282619:C:T	rs10917074	1	22282619	T	C	1:22281759:A:G		1	22281759	G	A	0.874582			E089;E090;E098;E100;E121;E126
1	previously not reported	HSPG2	1:22282619:C:T	rs7529220	1	22282619	T	C	1:22282117:A:C	rs4406609	1	22282117	C	A	0.888103	E001,7_Enh;E002,7_Enh;E003,7_Enh;E004,7_Enh;E005,7_Enh;E006,7_Enh;E007,7_Enh;E008,7_Enh;E009,7_Enh;E012,7_Enh;E013,7_Enh;E015,7_Enh;E016,7_Enh;E017,7_Enh;E018,7_Enh;E020,7_Enh;E021,7_Enh;E022,7_Enh;E023,7_Enh;E024,7_Enh;E025,2_TssAFlnk;E026,7_Enh;E027,7_Enh;E028,7_Enh;E034,7_Enh;E035,7_Enh;E036,7_Enh;E037,7_Enh;E038,7_Enh;E039,7_Enh;E041,7_Enh;E043,7_Enh;E044,7_Enh;E048,7_Enh;E050,7_Enh;E051,7_En…	E083,7_Enh;E095,7_Enh;E104,7_Enh;E105,7_Enh	E057;E080;E084;E088;E089;E090;E092;E100
1	previously not reported	HSPG2	1:22282619:C:T	rs7529220	1	22282619	T	C	1:22282619:C:T	rs7529220	1	22282619	T	C	1	E001,7_Enh;E002,7_Enh;E003,7_Enh;E004,7_Enh;E005,7_Enh;E006,7_Enh;E007,7_Enh;E008,7_Enh;E009,7_Enh;E012,7_Enh;E013,7_Enh;E014,7_Enh;E015,7_Enh;E016,7_Enh;E017,7_Enh;E018,7_Enh;E019,7_Enh;E021,7_Enh;E022,7_Enh;E023,7_Enh;E024,7_Enh;E025,7_Enh;E026,7_Enh;E027,7_Enh;E028,7_Enh;E033,7_Enh;E034,12_EnhBiv;E035,7_Enh;E036,7_Enh;E037,7_Enh;E038,7_Enh;E039,2_TssAFlnk;E040,7_Enh;E041,7_Enh;E042,7_Enh;E043,…	E083,7_Enh;E095,7_Enh;E104,7_Enh;E105,7_Enh	E004;E006;E007;E008;E021;E022;E028;E057;E098;E116;E119;E121;E123;E127
1	previously not reported	HSPG2	1:22282619:C:T	rs7529220	1	22282619	T	C	1:22283583:A:G	rs6675669	1	22283583	A	G	0.935455	E001,7_Enh;E002,7_Enh;E003,7_Enh;E004,7_Enh;E005,7_Enh;E006,7_Enh;E008,7_Enh;E011,7_Enh;E013,7_Enh;E014,7_Enh;E015,7_Enh;E016,7_Enh;E017,7_Enh;E019,7_Enh;E020,7_Enh;E021,7_Enh;E022,7_Enh;E023,7_Enh;E025,7_Enh;E026,7_Enh;E027,7_Enh;E028,7_Enh;E032,7_Enh;E033,7_Enh;E034,11_BivFlnk;E035,7_Enh;E036,2_TssAFlnk;E037,2_TssAFlnk;E038,2_TssAFlnk;E039,2_TssAFlnk;E040,7_Enh;E041,2_TssAFlnk;E042,7_Enh;E043,2…	E083,7_Enh;E095,7_Enh;E104,7_Enh;E105,7_Enh	E005;E028;E034;E050;E051;E055;E056;E057;E080;E083;E084;E086;E088;E092;E094;E098;E109;E117;E118;E119;E122;E125;E127;E128	E083
2	previously not reported	AIM1L	1:26679041:C:T	rs12031946	1	26679041	T	C	1:26679041:C:T	rs12031946	1	26679041	T	C	1	E001,7_Enh;E005,2_TssAFlnk;E006,7_Enh;E007,7_Enh;E009,7_Enh;E010,7_Enh;E012,7_Enh;E015,7_Enh;E022,7_Enh;E028,7_Enh;E057,7_Enh;E058,2_TssAFlnk;E062,7_Enh;E075,1_TssA;E077,1_TssA;E079,1_TssA;E084,7_Enh;E085,7_Enh;E091,2_TssAFlnk;E099,7_Enh;E101,1_TssA;E102,7_Enh;E110,7_Enh;E117,2_TssAFlnk;E118,2_TssAFlnk;E119,7_Enh;E125,7_Enh;E127,7_Enh		E007;E028;E055;E084;E117
3	previously not reported	MAP7D1	1:36620801:C:G	rs1475267	1	36620801	G	C	1:36620801:C:G	rs1475267	1	36620801	G	C	1	E001,11_BivFlnk;E002,12_EnhBiv;E003,12_EnhBiv;E004,12_EnhBiv;E005,7_Enh;E006,7_Enh;E007,7_Enh;E008,12_EnhBiv;E009,2_TssAFlnk;E010,2_TssAFlnk;E011,2_TssAFlnk;E012,2_TssAFlnk;E013,7_Enh;E014,11_BivFlnk;E015,12_EnhBiv;E016,12_EnhBiv;E017,7_Enh;E018,10_TssBiv;E019,11_BivFlnk;E020,10_TssBiv;E022,12_EnhBiv;E023,2_TssAFlnk;E024,7_Enh;E025,2_TssAFlnk;E026,2_TssAFlnk;E027,2_TssAFlnk;E029,7_Enh;E030,2_TssA…	E083,7_Enh;E095,7_Enh;E104,7_Enh;E105,7_Enh	E003;E005;E006;E007;E051;E083;E084;E097;E118;E121	E083
3	previously not reported	MAP7D1	1:36620801:C:G	rs1475267	1	36620801	G	C	1:36622730:C:T	rs272834	1	36622730	T	C	0.96646	E001,1_TssA;E002,1_TssA;E003,1_TssA;E004,1_TssA;E005,1_TssA;E006,1_TssA;E007,1_TssA;E008,1_TssA;E009,1_TssA;E010,1_TssA;E011,1_TssA;E012,1_TssA;E013,1_TssA;E014,1_TssA;E015,1_TssA;E016,1_TssA;E017,1_TssA;E018,1_TssA;E019,1_TssA;E020,1_TssA;E021,1_TssA;E022,1_TssA;E023,1_TssA;E024,1_TssA;E025,1_TssA;E026,1_TssA;E027,1_TssA;E028,1_TssA;E029,1_TssA;E030,2_TssAFlnk;E031,2_TssAFlnk;E032,1_TssA;E033,1_…	E083,1_TssA;E095,1_TssA;E104,1_TssA;E105,1_TssA	E003;E004;E005;E006;E007;E008;E021;E022;E028;E034;E050;E051;E056;E057;E059;E080;E081;E082;E083;E086;E088;E089;E090;E091;E092;E093;E097;E098;E109;E116;E118;E119;E121;E122;E123;E125;E127	E083
3	previously not reported	MAP7D1	1:36620801:C:G	rs1475267	1	36620801	G	C	1:36636095:D:I	rs11368766	1	36636095	D	I	0.893223	E017,6_EnhG;E025,6_EnhG;E027,6_EnhG;E028,6_EnhG;E046,6_EnhG;E049,6_EnhG;E052,6_EnhG;E055,6_EnhG;E056,6_EnhG;E057,6_EnhG;E058,6_EnhG;E063,6_EnhG;E067,6_EnhG;E068,6_EnhG;E069,6_EnhG;E071,6_EnhG;E072,6_EnhG;E073,7_Enh;E074,6_EnhG;E076,6_EnhG;E078,7_Enh;E083,2_TssAFlnk;E090,6_EnhG;E095,6_EnhG;E100,7_Enh;E103,6_EnhG;E104,7_Enh;E105,6_EnhG;E107,3_TxFlnk;E108,2_TssAFlnk;E111,3_TxFlnk;E119,6_EnhG;E125,6_…	E083,2_TssAFlnk;E095,6_EnhG;E104,7_Enh;E105,6_EnhG	E083	E083
5	previously not reported	SSBP3	1:54741767:C:T	rs603901	1	54741767	C	T	1:54737590:A:G	rs487645	1	54737590	A	G	0.975665	E005,6_EnhG;E006,7_Enh;E017,6_EnhG;E023,7_Enh;E025,7_Enh;E027,6_EnhG;E034,7_Enh;E056,6_EnhG;E059,7_Enh;E061,7_Enh;E066,7_Enh;E069,7_Enh;E071,7_Enh;E072,7_Enh;E074,7_Enh;E076,7_Enh;E077,7_Enh;E078,7_Enh;E079,7_Enh;E084,6_EnhG;E085,6_EnhG;E089,6_EnhG;E090,7_Enh;E094,7_Enh;E095,7_Enh;E096,7_Enh;E097,7_Enh;E100,7_Enh;E103,7_Enh;E107,7_Enh;E108,7_Enh;E111,7_Enh;E113,6_EnhG;E117,7_Enh	E095,7_Enh
5	previously not reported	SSBP3	1:54741767:C:T	rs603901	1	54741767	C	T	1:54741767:C:T	rs603901	1	54741767	C	T	1	E003,7_Enh;E004,7_Enh;E005,7_Enh;E011,6_EnhG;E012,7_Enh;E013,7_Enh;E014,7_Enh;E015,7_Enh;E017,6_EnhG;E018,7_Enh;E019,7_Enh;E023,7_Enh;E024,7_Enh;E025,7_Enh;E026,7_Enh;E027,7_Enh;E033,6_EnhG;E034,7_Enh;E035,6_EnhG;E038,7_Enh;E039,7_Enh;E041,7_Enh;E042,7_Enh;E046,6_EnhG;E047,7_Enh;E048,7_Enh;E049,7_Enh;E052,7_Enh;E055,6_EnhG;E056,7_Enh;E057,7_Enh;E058,7_Enh;E059,7_Enh;E061,7_Enh;E063,7_Enh;E065,7_E…	E083,7_Enh;E095,7_Enh;E104,7_Enh;E105,7_Enh	E006;E088;E097
5	previously not reported	SSBP3	1:54741767:C:T	rs603901	1	54741767	C	T	1:54742078:A:G	rs536684	1	54742078	A	G	0.995477	E005,7_Enh;E011,6_EnhG;E012,7_Enh;E015,7_Enh;E017,6_EnhG;E023,7_Enh;E025,7_Enh;E026,7_Enh;E027,7_Enh;E034,7_Enh;E038,7_Enh;E039,7_Enh;E041,7_Enh;E046,6_EnhG;E047,7_Enh;E048,7_Enh;E052,7_Enh;E055,6_EnhG;E056,7_Enh;E063,7_Enh;E065,7_Enh;E066,7_Enh;E067,7_Enh;E068,7_Enh;E069,7_Enh;E071,7_Enh;E074,7_Enh;E075,7_Enh;E076,7_Enh;E077,7_Enh;E078,7_Enh;E079,7_Enh;E080,7_Enh;E083,7_Enh;E084,7_Enh;E085,6_Enh…	E083,7_Enh;E095,7_Enh;E104,7_Enh;E105,7_Enh	E123
5	previously not reported	SSBP3	1:54741767:C:T	rs603901	1	54741767	C	T	1:54742471:C:T	rs590041	1	54742471	T	C	0.987387	E005,6_EnhG;E006,6_EnhG;E011,6_EnhG;E013,6_EnhG;E015,7_Enh;E017,6_EnhG;E023,7_Enh;E026,7_Enh;E027,6_EnhG;E033,6_EnhG;E034,7_Enh;E038,7_Enh;E039,7_Enh;E041,7_Enh;E043,7_Enh;E046,6_EnhG;E047,7_Enh;E048,7_Enh;E052,7_Enh;E055,6_EnhG;E056,7_Enh;E062,7_Enh;E063,7_Enh;E065,7_Enh;E066,2_TssAFlnk;E067,7_Enh;E068,7_Enh;E069,7_Enh;E071,7_Enh;E072,7_Enh;E073,7_Enh;E074,7_Enh;E075,7_Enh;E076,7_Enh;E077,7_Enh;…	E083,7_Enh;E095,7_Enh;E104,7_Enh;E105,7_Enh	E083;E098	E083
5	previously not reported	SSBP3	1:54741767:C:T	rs603901	1	54741767	C	T	1:54742618:A:G	rs562408	1	54742618	A	G	0.880537	E006,6_EnhG;E011,6_EnhG;E017,6_EnhG;E023,7_Enh;E025,7_Enh;E026,7_Enh;E027,6_EnhG;E033,7_Enh;E034,7_Enh;E038,7_Enh;E039,2_TssAFlnk;E041,7_Enh;E043,7_Enh;E046,6_EnhG;E047,7_Enh;E048,7_Enh;E049,7_Enh;E052,7_Enh;E055,6_EnhG;E056,7_Enh;E062,7_Enh;E063,7_Enh;E065,7_Enh;E066,2_TssAFlnk;E067,7_Enh;E068,7_Enh;E069,7_Enh;E071,7_Enh;E072,7_Enh;E073,7_Enh;E074,7_Enh;E075,7_Enh;E076,7_Enh;E077,2_TssAFlnk;E078…	E083,7_Enh;E095,7_Enh;E104,7_Enh;E105,7_Enh	E097;E109
6	previously not reported	NFIA	1:61895257:A:C	rs6587924	1	61895257	C	A	1:61886599:C:T	rs12142600	1	61886599	C	T	0.926278	E001,7_Enh;E014,7_Enh;E015,7_Enh;E018,7_Enh;E019,7_Enh;E020,7_Enh;E035,7_Enh;E036,7_Enh;E050,7_Enh;E051,2_TssAFlnk;E068,7_Enh;E083,7_Enh	E083,7_Enh
6	previously not reported	NFIA	1:61895257:A:C	rs6587924	1	61895257	C	A	1:61886744:C:T	rs4915740	1	61886744	C	T	0.887054	E001,7_Enh;E008,7_Enh;E014,7_Enh;E015,7_Enh;E018,7_Enh;E035,7_Enh;E036,7_Enh;E050,7_Enh;E051,2_TssAFlnk;E083,7_Enh;E095,7_Enh;E104,7_Enh	E083,7_Enh;E095,7_Enh;E104,7_Enh	E083	E083
6	previously not reported	NFIA	1:61895257:A:C	rs6587924	1	61895257	C	A	1:61888615:C:T	rs2024790	1	61888615	C	T	0.943351	E090,6_EnhG;E122,7_Enh
6	previously not reported	NFIA	1:61895257:A:C	rs6587924	1	61895257	C	A	1:61897148:A:T	rs4915741	1	61897148	T	A	0.82543	E065,6_EnhG;E083,7_Enh;E100,7_Enh	E083,7_Enh
6	previously not reported	NFIA	1:61895257:A:C	rs6587924	1	61895257	C	A	1:61897967:A:G	rs2207790	1	61897967	G	A	0.924737	E083,7_Enh;E090,6_EnhG;E095,7_Enh;E097,7_Enh;E104,7_Enh;E105,7_Enh	E083,7_Enh;E095,7_Enh;E104,7_Enh;E105,7_Enh
6	previously not reported	NFIA	1:61895257:A:C	rs6587924	1	61895257	C	A	1:61899519:A:G	rs11207739	1	61899519	A	G	0.925632	E028,7_Enh;E051,7_Enh;E057,7_Enh;E058,7_Enh;E068,7_Enh;E071,7_Enh;E083,7_Enh;E095,7_Enh;E104,7_Enh;E119,7_Enh;E122,7_Enh;E127,7_Enh	E083,7_Enh;E095,7_Enh;E104,7_Enh	E122
6	previously not reported	NFIA	1:61895257:A:C	rs6587924	1	61895257	C	A	1:61903521:D:I	rs66839476	1	61903521	I	T	0.886776	E065,7_Enh;E083,7_Enh;E095,7_Enh;E104,7_Enh;E105,7_Enh	E083,7_Enh;E095,7_Enh;E104,7_Enh;E105,7_Enh
6	previously not reported	NFIA	1:61895257:A:C	rs6587924	1	61895257	C	A	1:61909126:A:G	rs12741766	1	61909126	A	G	0.838329	E003,7_Enh;E010,7_Enh;E011,7_Enh;E016,7_Enh;E019,7_Enh;E020,7_Enh;E027,7_Enh;E050,7_Enh;E051,7_Enh;E053,7_Enh;E054,6_EnhG;E063,7_Enh;E065,7_Enh;E068,7_Enh;E069,7_Enh;E076,7_Enh;E077,7_Enh;E078,7_Enh;E080,7_Enh;E083,7_Enh;E084,7_Enh;E085,7_Enh;E086,7_Enh;E088,6_EnhG;E090,7_Enh;E092,7_Enh;E095,7_Enh;E102,7_Enh;E103,7_Enh;E104,7_Enh;E105,7_Enh;E107,7_Enh;E108,7_Enh;E109,7_Enh;E111,7_Enh;E113,7_Enh;E…	E083,7_Enh;E095,7_Enh;E104,7_Enh;E105,7_Enh	E086
7	previously not reported	CDC7	1:91966445:A:G	rs13447455	1	91966445	A	G	1:91964946:C:T	rs12717798	1	91964946	T	C	0.946905	E036,7_Enh		E118
7	previously not reported	CDC7	1:91966445:A:G	rs13447455	1	91966445	A	G	1:91965850:C:T	rs13447450	1	91965850	C	T	0.944475	E001,1_TssA;E002,1_TssA;E003,1_TssA;E004,2_TssAFlnk;E005,7_Enh;E007,7_Enh;E008,1_TssA;E009,2_TssAFlnk;E010,1_TssA;E011,2_TssAFlnk;E012,2_TssAFlnk;E013,1_TssA;E014,2_TssAFlnk;E015,2_TssAFlnk;E016,2_TssAFlnk;E018,2_TssAFlnk;E019,2_TssAFlnk;E020,2_TssAFlnk;E021,7_Enh;E022,7_Enh;E023,2_TssAFlnk;E024,2_TssAFlnk;E025,2_TssAFlnk;E026,2_TssAFlnk;E027,2_TssAFlnk;E029,2_TssAFlnk;E030,2_TssAFlnk;E031,2_TssA…	E083,2_TssAFlnk;E095,7_Enh;E104,1_TssA;E105,1_TssA	E008;E032;E059;E083;E088;E118;E123	E083
7	previously not reported	CDC7	1:91966445:A:G	rs13447455	1	91966445	A	G	1:91966445:A:G	rs13447455	1	91966445	A	G	1	E001,1_TssA;E002,1_TssA;E003,1_TssA;E004,1_TssA;E005,1_TssA;E006,1_TssA;E007,1_TssA;E008,1_TssA;E009,1_TssA;E010,1_TssA;E011,1_TssA;E012,1_TssA;E013,1_TssA;E014,1_TssA;E015,1_TssA;E016,1_TssA;E017,1_TssA;E018,1_TssA;E019,1_TssA;E020,1_TssA;E021,1_TssA;E022,1_TssA;E023,1_TssA;E024,1_TssA;E025,1_TssA;E026,1_TssA;E027,1_TssA;E028,1_TssA;E029,1_TssA;E030,2_TssAFlnk;E031,1_TssA;E032,1_TssA;E033,1_TssA…	E083,1_TssA;E095,1_TssA;E104,1_TssA;E105,1_TssA	E003;E004;E005;E006;E007;E008;E017;E021;E022;E028;E029;E032;E033;E034;E046;E050;E051;E055;E056;E057;E059;E080;E081;E082;E083;E084;E085;E086;E088;E089;E090;E091;E092;E093;E094;E097;E098;E100;E109;E114;E116;E117;E118;E119;E120;E121;E122;E123;E124;E125;E126;E127;E128	E083
8	previously not reported	GJA5	1:146598683:A:G	rs61838936	1	146598683	G	A	1:146570006:C:T		1	146570006	C	T	0.928223			E119
8	previously not reported	GJA5	1:146598683:A:G	rs7514808	1	146598683	G	A	1:146570076:A:G		1	146570076	G	A	0.928223			E004;E017;E022;E032;E050;E055;E059;E091;E098;E109;E114;E126
8	previously not reported	GJA5	1:146598683:A:G	rs112057010	1	146598683	G	A	1:146575945:A:C	rs4950367	1	146575945	C	A	0.952797	E005,7_Enh;E011,7_Enh;E061,7_Enh;E066,7_Enh
8	previously not reported	GJA5	1:146598683:A:G	rs112057010	1	146598683	G	A	1:146576897:D:I	rs150837924	1	146576897	I	G	0.947495	E011,7_Enh
8	previously not reported	GJA5	1:146598683:A:G	rs112057010	1	146598683	G	A	1:146577525:A:G	rs61838938	1	146577525	G	A	0.928223	E005,7_Enh;E011,7_Enh;E051,7_Enh;E091,7_Enh;E123,7_Enh
8	previously not reported	GJA5	1:146598683:A:G	rs112057010	1	146598683	G	A	1:146577541:D:I	rs79117302	1	146577541	I	C	0.928223	E005,7_Enh;E011,7_Enh;E051,7_Enh;E091,7_Enh;E123,7_Enh		E005
8	previously not reported	GJA5	1:146598683:A:G	rs112057010	1	146598683	G	A	1:146577889:C:T	rs56012243	1	146577889	C	T	0.928223	E011,2_TssAFlnk;E051,7_Enh;E091,7_Enh;E123,7_Enh		E004
8	previously not reported	GJA5	1:146598683:A:G	rs112057010	1	146598683	G	A	1:146578226:C:T	rs11809709	1	146578226	T	C	0.928223	E011,7_Enh;E013,7_Enh;E051,7_Enh;E091,7_Enh;E123,7_Enh		E004;E005;E091;E123
8	previously not reported	GJA5	1:146598683:A:G	rs112057010	1	146598683	G	A	1:146578261:A:C	rs11809327	1	146578261	A	C	0.928223	E011,7_Enh;E013,7_Enh;E051,7_Enh;E091,7_Enh;E123,7_Enh		E004;E005;E091;E123
8	previously not reported	GJA5	1:146598683:A:G	rs112057010	1	146598683	G	A	1:146578263:D:I	rs11809328	1	146578263	D	I	0.924266	E011,7_Enh;E013,7_Enh;E051,7_Enh;E091,7_Enh;E123,7_Enh		E004;E005;E091;E123
8	previously not reported	GJA5	1:146598683:A:G	rs112057010	1	146598683	G	A	1:146578307:A:T	rs11809339	1	146578307	A	T	0.928223	E011,7_Enh;E013,7_Enh;E051,7_Enh;E091,7_Enh;E123,7_Enh		E004;E123
8	previously not reported	GJA5	1:146598683:A:G	rs112057010	1	146598683	G	A	1:146579259:C:G	rs55828524	1	146579259	G	C	0.928223	E011,7_Enh;E066,7_Enh		E097
8	previously not reported	GJA5	1:146598683:A:G	rs112057010	1	146598683	G	A	1:146579535:A:C	rs55963049	1	146579535	C	A	0.928223	E011,7_Enh;E066,6_EnhG
8	previously not reported	GJA5	1:146598683:A:G	rs112057010	1	146598683	G	A	1:146579574:C:T	rs17355398	1	146579574	C	T	0.928223	E011,7_Enh;E066,6_EnhG
8	previously not reported	GJA5	1:146598683:A:G	rs112057010	1	146598683	G	A	1:146579688:A:G	rs55791847	1	146579688	A	G	0.928223	E011,7_Enh;E066,6_EnhG
8	previously not reported	GJA5	1:146598683:A:G	rs112057010	1	146598683	G	A	1:146581118:C:T	rs11811023	1	146581118	T	C	0.928223	E066,2_TssAFlnk;E116,7_Enh;E118,7_Enh
8	previously not reported	GJA5	1:146598683:A:G	rs112057010	1	146598683	G	A	1:146581676:C:T	rs17355419	1	146581676	T	C	0.947495	E066,2_TssAFlnk;E118,7_Enh
8	previously not reported	GJA5	1:146598683:A:G	rs112057010	1	146598683	G	A	1:146581801:A:G	rs72706428	1	146581801	G	A	0.947495	E066,2_TssAFlnk;E118,7_Enh
8	previously not reported	GJA5	1:146598683:A:G	rs112057010	1	146598683	G	A	1:146581857:C:T	rs61838944	1	146581857	C	T	0.947495	E066,2_TssAFlnk;E118,7_Enh
8	previously not reported	GJA5	1:146598683:A:G	rs112057010	1	146598683	G	A	1:146582208:D:I	rs5777623	1	146582208	I	A	0.947495	E066,1_TssA;E118,7_Enh
8	previously not reported	GJA5	1:146598683:A:G	rs112057010	1	146598683	G	A	1:146582724:C:G	rs972368	1	146582724	C	G	0.952619	E011,7_Enh;E066,2_TssAFlnk;E118,7_Enh
8	previously not reported	GJA5	1:146598683:A:G	rs112057010	1	146598683	G	A	1:146582876:D:I	rs75618619	1	146582876	I	T	0.947495	E011,7_Enh;E066,2_TssAFlnk;E118,7_Enh
8	previously not reported	GJA5	1:146598683:A:G	rs112057010	1	146598683	G	A	1:146583059:G:T	rs61838945	1	146583059	G	T	0.942225	E011,7_Enh;E066,2_TssAFlnk;E118,7_Enh		E091
8	previously not reported	GJA5	1:146598683:A:G	rs112057010	1	146598683	G	A	1:146583429:A:G	rs56864370	1	146583429	A	G	0.895273	E066,7_Enh
8	previously not reported	GJA5	1:146598683:A:G	rs112057010	1	146598683	G	A	1:146583568:A:G	rs6686480	1	146583568	G	A	0.947495	E066,7_Enh
8	previously not reported	GJA5	1:146598683:A:G	rs112057010	1	146598683	G	A	1:146583569:A:T	rs6700783	1	146583569	A	T	0.947495	E066,7_Enh
8	previously not reported	GJA5	1:146598683:A:G	rs112057010	1	146598683	G	A	1:146584161:C:G	rs1813002	1	146584161	C	G	0.928223	E066,7_Enh
8	previously not reported	GJA5	1:146598683:A:G	rs112057010	1	146598683	G	A	1:146584316:A:T	rs61838947	1	146584316	T	A	0.947495	E066,7_Enh
8	previously not reported	GJA5	1:146598683:A:G	rs112057010	1	146598683	G	A	1:146584337:A:G	rs76757751	1	146584337	G	A	0.947495	E066,7_Enh
8	previously not reported	GJA5	1:146598683:A:G	rs112057010	1	146598683	G	A	1:146585825:A:G	rs4950371	1	146585825	G	A	0.947495	E005,7_Enh;E066,7_Enh
8	previously not reported	GJA5	1:146598683:A:G	rs112057010	1	146598683	G	A	1:146587663:C:T	rs61838951	1	146587663	T	C	0.928223	E066,7_Enh
8	previously not reported	GJA5	1:146598683:A:G	rs112057010	1	146598683	G	A	1:146588768:A:G	rs7541393	1	146588768	G	A	0.947495	E066,7_Enh
8	previously not reported	GJA5	1:146598683:A:G	rs112057010	1	146598683	G	A	1:146588793:C:G	rs56198825	1	146588793	G	C	0.886782	E066,7_Enh
8	previously not reported	GJA5	1:146598683:A:G	rs112057010	1	146598683	G	A	1:146589003:C:T	rs56151278	1	146589003	T	C	0.928223	E066,7_Enh
8	previously not reported	GJA5	1:146598683:A:G	rs112057010	1	146598683	G	A	1:146591674:C:T	rs4950308	1	146591674	C	T	0.947495	E096,11_BivFlnk		E123
8	previously not reported	GJA5	1:146598683:A:G	rs112057010	1	146598683	G	A	1:146592787:C:T	rs55697094	1	146592787	T	C	0.963199	E005,7_Enh;E011,7_Enh
8	previously not reported	GJA5	1:146598683:A:G	rs112057010	1	146598683	G	A	1:146593119:A:G	rs17359629	1	146593119	G	A	0.984075	E005,7_Enh;E011,7_Enh
8	previously not reported	GJA5	1:146598683:A:G	rs112057010	1	146598683	G	A	1:146595897:G:T	rs72706444	1	146595897	G	T	0.979272	E001,7_Enh;E003,7_Enh;E008,7_Enh;E015,7_Enh;E018,7_Enh;E024,7_Enh
8	previously not reported	GJA5	1:146598683:A:G	rs112057010	1	146598683	G	A	1:146596398:C:T	rs4950373	1	146596398	C	T	0.800946	E001,7_Enh;E003,7_Enh;E004,7_Enh;E008,7_Enh;E018,7_Enh;E123,7_Enh
8	previously not reported	GJA5	1:146598683:A:G	rs112057010	1	146598683	G	A	1:146600607:G:T	rs2008414	1	146600607	T	G	0.800946	E088,7_Enh
8	previously not reported	GJA5	1:146598683:A:G	rs112057010	1	146598683	G	A	1:146600652:D:I	rs5777625	1	146600652	D	I	0.800946	E088,7_Enh
8	previously not reported	GJA5	1:146598683:A:G	rs112057010	1	146598683	G	A	1:146601102:C:G	rs55799799	1	146601102	G	C	0.973973	E088,7_Enh
8	previously not reported	GJA5	1:146598683:A:G	rs112057010	1	146598683	G	A	1:146601485:A:G	rs1822309	1	146601485	G	A	0.973973	E088,7_Enh
8	previously not reported	GJA5	1:146598683:A:G	rs112057010	1	146598683	G	A	1:146637585:C:T	rs4950379	1	146637585	C	T	0.927237	E017,6_EnhG;E057,6_EnhG;E058,6_EnhG;E127,6_EnhG
8	previously not reported	GJA5	1:146598683:A:G	rs112057010	1	146598683	G	A	1:146641686:A:T	rs3766522	1	146641686	A	T	0.968237	E001,2_TssAFlnk;E002,7_Enh;E009,7_Enh;E010,7_Enh;E011,1_TssA;E012,7_Enh;E013,1_TssA;E014,2_TssAFlnk;E015,2_TssAFlnk;E016,2_TssAFlnk;E017,1_TssA;E018,7_Enh;E019,7_Enh;E020,2_TssAFlnk;E023,1_TssA;E025,2_TssAFlnk;E026,2_TssAFlnk;E027,7_Enh;E028,7_Enh;E036,7_Enh;E038,7_Enh;E039,7_Enh;E040,7_Enh;E041,7_Enh;E049,2_TssAFlnk;E050,7_Enh;E051,2_TssAFlnk;E052,2_TssAFlnk;E055,2_TssAFlnk;E057,2_TssAFlnk;E058,…	E083,7_Enh;E104,1_TssA	E006;E123
8	previously not reported	GJA5	1:146598683:A:G	rs112057010	1	146598683	G	A	1:146644199:A:C	rs115179956	1	146644199	C	A	0.904186	E001,1_TssA;E002,1_TssA;E003,1_TssA;E004,1_TssA;E005,1_TssA;E006,1_TssA;E007,1_TssA;E008,1_TssA;E009,1_TssA;E010,1_TssA;E011,1_TssA;E012,1_TssA;E013,1_TssA;E014,1_TssA;E015,1_TssA;E016,1_TssA;E017,1_TssA;E018,1_TssA;E019,1_TssA;E020,1_TssA;E021,1_TssA;E022,1_TssA;E023,1_TssA;E024,1_TssA;E025,1_TssA;E026,1_TssA;E027,1_TssA;E028,1_TssA;E029,1_TssA;E030,1_TssA;E031,1_TssA;E032,1_TssA;E033,1_TssA;E03…	E095,1_TssA;E104,1_TssA;E105,1_TssA	E003;E004;E005;E006;E007;E008;E017;E021;E022;E028;E029;E032;E033;E034;E046;E050;E051;E055;E056;E057;E059;E080;E081;E082;E083;E084;E085;E086;E088;E089;E090;E091;E092;E093;E094;E097;E098;E100;E109;E114;E116;E117;E118;E119;E120;E121;E122;E123;E124;E125;E126;E127;E128	E083
8	previously not reported	GJA5	1:146598683:A:G	rs112057010	1	146598683	G	A	1:146648889:C:G	rs4950384	1	146648889	G	C	0.932894	E023,7_Enh;E049,7_Enh;E052,7_Enh;E055,7_Enh;E056,7_Enh
8	previously not reported	GJA5	1:146598683:A:G	rs112057010	1	146598683	G	A	1:146649084:A:C	rs2883434	1	146649084	A	C	0.900129	E018,12_EnhBiv;E023,2_TssAFlnk;E025,2_TssAFlnk;E026,7_Enh;E049,7_Enh;E052,7_Enh;E055,7_Enh;E056,7_Enh;E077,1_TssA;E080,7_Enh;E107,7_Enh;E120,7_Enh;E126,7_Enh;E127,7_Enh;E128,7_Enh;E129,7_Enh		E055;E056;E080;E109
8	previously not reported	GJA5	1:146598683:A:G	rs17159914	1	146598683	G	A	1:146654805:C:T		1	146654805	T	C	0.900129			E017;E056
8	previously not reported	GJA5	1:146598683:A:G	rs112057010	1	146598683	G	A	1:146655026:A:G	rs56080828	1	146655026	G	A	0.927697	E023,7_Enh
8	previously not reported	GJA5	1:146598683:A:G	rs112057010	1	146598683	G	A	1:146656754:D:I	rs11336263	1	146656754	I	A	0.900129	E011,7_Enh;E014,7_Enh;E015,7_Enh;E016,7_Enh;E018,7_Enh;E019,7_Enh;E020,7_Enh
8	previously not reported	GJA5	1:146598683:A:G	rs112057010	1	146598683	G	A	1:146658041:D:I	rs11387382	1	146658041	D	I	0.922533	E015,7_Enh
8	previously not reported	GJA5	1:146598683:A:G	rs112057010	1	146598683	G	A	1:146661337:G:T	rs12046706	1	146661337	G	T	0.900129	E067,7_Enh		E022
8	previously not reported	GJA5	1:146598683:A:G	rs112057010	1	146598683	G	A	1:146670819:D:I	rs76315499	1	146670819	I	A	0.927697	E069,7_Enh
8	previously not reported	GJA5	1:146598683:A:G	rs112057010	1	146598683	G	A	1:146673507:A:C	rs28381210	1	146673507	C	A	0.927697	E028,7_Enh;E088,7_Enh;E128,7_Enh
8	previously not reported	GJA5	1:146598683:A:G	rs112057010	1	146598683	G	A	1:146686228:C:T	rs3766520	1	146686228	C	T	0.927697	E031,7_Enh;E032,7_Enh;E035,7_Enh;E036,7_Enh;E050,7_Enh;E051,7_Enh;E066,6_EnhG;E077,7_Enh;E102,7_Enh;E118,7_Enh
8	previously not reported	GJA5	1:146598683:A:G	rs112057010	1	146598683	G	A	1:146686372:C:T	rs3766519	1	146686372	C	T	0.92272	E031,7_Enh;E032,7_Enh;E035,7_Enh;E036,7_Enh;E050,7_Enh;E051,7_Enh;E066,6_EnhG;E077,7_Enh;E102,7_Enh;E118,7_Enh
8	previously not reported	GJA5	1:146598683:A:G	rs112057010	1	146598683	G	A	1:146688941:C:T	rs1932977	1	146688941	T	C	0.883511	E029,7_Enh;E066,6_EnhG;E118,7_Enh;E124,7_Enh		E029;E124
8	previously not reported	GJA5	1:146598683:A:G	rs112057010	1	146598683	G	A	1:146705892:C:T	rs4593887	1	146705892	T	C	0.9123	E066,7_Enh;E077,7_Enh;E084,7_Enh;E085,7_Enh;E096,7_Enh;E098,7_Enh;E102,7_Enh;E106,7_Enh;E109,7_Enh;E110,7_Enh;E118,7_Enh		E084;E085;E109;E118
8	previously not reported	GJA5	1:146598683:A:G	rs112057010	1	146598683	G	A	1:146705955:A:G	rs72691004	1	146705955	G	A	0.907307	E066,7_Enh;E077,7_Enh;E084,7_Enh;E085,7_Enh;E096,7_Enh;E098,7_Enh;E102,7_Enh;E106,7_Enh;E109,7_Enh;E110,7_Enh;E118,7_Enh		E084;E085;E118
8	previously not reported	GJA5	1:146598683:A:G	rs112057010	1	146598683	G	A	1:146707223:G:T	rs79810882	1	146707223	G	T	0.907307	E066,7_Enh;E102,7_Enh;E110,7_Enh;E118,7_Enh
8	previously not reported	GJA5	1:146598683:A:G	rs112057010	1	146598683	G	A	1:146711400:C:G	rs72691012	1	146711400	G	C	0.894686	E011,7_Enh;E015,7_Enh;E066,7_Enh;E077,7_Enh;E084,7_Enh;E085,7_Enh;E086,7_Enh;E088,7_Enh;E098,7_Enh;E101,7_Enh;E102,7_Enh;E110,7_Enh;E114,7_Enh;E118,2_TssAFlnk
8	previously not reported	GJA5	1:146598683:A:G	rs112057010	1	146598683	G	A	1:146712455:A:C	rs4950313	1	146712455	A	C	0.894686	E001,7_Enh;E002,7_Enh;E003,7_Enh;E011,7_Enh;E014,7_Enh;E015,7_Enh;E016,7_Enh;E018,7_Enh;E019,7_Enh;E020,7_Enh;E021,7_Enh;E084,7_Enh;E086,7_Enh;E096,7_Enh;E098,7_Enh;E101,7_Enh;E102,7_Enh;E118,7_Enh
8	previously not reported	GJA5	1:146598683:A:G	rs112057010	1	146598683	G	A	1:146717027:C:T	rs72691016	1	146717027	T	C	0.851877	E004,2_TssAFlnk;E005,6_EnhG;E006,7_Enh;E007,12_EnhBiv;E011,1_TssA;E014,7_Enh;E015,2_TssAFlnk;E016,7_Enh;E017,7_Enh;E018,7_Enh;E021,7_Enh;E022,7_Enh;E023,7_Enh;E025,7_Enh;E028,7_Enh;E029,7_Enh;E030,7_Enh;E033,7_Enh;E035,7_Enh;E036,2_TssAFlnk;E038,7_Enh;E040,7_Enh;E041,7_Enh;E042,7_Enh;E050,7_Enh;E051,2_TssAFlnk;E055,7_Enh;E057,7_Enh;E058,7_Enh;E061,7_Enh;E066,7_Enh;E068,7_Enh;E069,7_Enh;E083,7_Enh…	E083,7_Enh;E095,7_Enh	E004;E123
8	previously not reported	GJA5	1:146598683:A:G	rs112057010	1	146598683	G	A	1:146717699:C:T	rs11239954	1	146717699	C	T	0.837482	E011,3_TxFlnk;E017,7_Enh;E023,7_Enh;E025,7_Enh;E028,6_EnhG;E029,7_Enh;E030,7_Enh;E036,7_Enh;E037,7_Enh;E040,7_Enh;E041,7_Enh;E050,7_Enh;E051,7_Enh;E056,7_Enh;E061,7_Enh;E066,7_Enh;E068,7_Enh;E113,7_Enh;E115,3_TxFlnk;E116,1_TssA;E117,7_Enh;E118,7_Enh;E119,7_Enh;E123,3_TxFlnk;E124,7_Enh;E127,6_EnhG		E123
8	previously not reported	GJA5	1:146598683:A:G	rs112057010	1	146598683	G	A	1:146717973:C:T	rs76327075	1	146717973	C	T	0.837482	E011,3_TxFlnk;E023,7_Enh;E025,7_Enh;E028,6_EnhG;E029,7_Enh;E036,7_Enh;E037,7_Enh;E041,7_Enh;E050,7_Enh;E051,7_Enh;E058,6_EnhG;E061,7_Enh;E066,7_Enh;E115,6_EnhG;E116,1_TssA;E117,7_Enh;E118,7_Enh;E123,3_TxFlnk;E124,7_Enh;E127,7_Enh
8	previously not reported	GJA5	1:146598683:A:G	rs112057010	1	146598683	G	A	1:146719108:A:G	rs11239958	1	146719108	G	A	0.837482	E001,7_Enh;E002,7_Enh;E003,7_Enh;E004,7_Enh;E005,7_Enh;E008,7_Enh;E009,7_Enh;E010,7_Enh;E011,7_Enh;E013,7_Enh;E014,7_Enh;E015,7_Enh;E016,7_Enh;E017,7_Enh;E018,7_Enh;E019,7_Enh;E020,2_TssAFlnk;E021,7_Enh;E022,7_Enh;E023,7_Enh;E024,7_Enh;E025,7_Enh;E028,7_Enh;E029,7_Enh;E030,7_Enh;E031,7_Enh;E032,7_Enh;E033,7_Enh;E035,7_Enh;E036,2_TssAFlnk;E037,7_Enh;E038,7_Enh;E039,7_Enh;E040,7_Enh;E041,7_Enh;E042…	E095,7_Enh;E104,7_Enh;E105,7_Enh	E029;E032;E033;E050;E051;E086;E093;E116;E123;E124
8	previously not reported	GJA5	1:146598683:A:G	rs112057010	1	146598683	G	A	1:146720934:C:T	rs12060046	1	146720934	T	C	0.837482	E014,7_Enh;E020,7_Enh;E115,7_Enh;E118,7_Enh;E122,7_Enh
8	previously not reported	GJA5	1:146598683:A:G	rs112057010	1	146598683	G	A	1:146725993:D:I	rs138772931	1	146725993	I	C	0.851877	E059,7_Enh;E061,7_Enh
8	previously not reported	GJA5	1:146598683:A:G	rs112057010	1	146598683	G	A	1:146727110:A:G	rs72691025	1	146727110	G	A	0.837482	E061,7_Enh
8	previously not reported	GJA5	1:146598683:A:G	rs112057010	1	146598683	G	A	1:146727213:C:T	rs17160050	1	146727213	T	C	0.837482	E061,6_EnhG
8	previously not reported	GJA5	1:146598683:A:G	rs112057010	1	146598683	G	A	1:146727388:G:T	rs17160051	1	146727388	G	T	0.842178	E061,6_EnhG		E059
8	previously not reported	GJA5	1:146598683:A:G	rs112057010	1	146598683	G	A	1:146732707:A:G	rs11800580	1	146732707	G	A	0.847013	E118,6_EnhG
8	previously not reported	GJA5	1:146598683:A:G	rs112057010	1	146598683	G	A	1:146732774:A:G	rs72691032	1	146732774	G	A	0.847013	E118,6_EnhG		E084
8	previously not reported	GJA5	1:146598683:A:G	rs112057010	1	146598683	G	A	1:146732921:C:T	rs72691033	1	146732921	C	T	0.847013	E118,6_EnhG
8	previously not reported	GJA5	1:146598683:A:G	rs112057010	1	146598683	G	A	1:146736092:C:T	rs4950315	1	146736092	C	T	0.842092	E017,7_Enh;E023,7_Enh;E025,7_Enh;E026,7_Enh;E028,6_EnhG;E049,6_EnhG;E052,7_Enh;E055,7_Enh;E056,7_Enh;E059,7_Enh;E061,7_Enh;E119,6_EnhG;E126,7_Enh;E127,7_Enh;E128,7_Enh;E129,6_EnhG		E017;E028;E055;E056
8	previously not reported	GJA5	1:146598683:A:G	rs112057010	1	146598683	G	A	1:146736548:G:T	rs4950392	1	146736548	G	T	0.847013	E017,7_Enh;E023,7_Enh;E025,7_Enh;E026,7_Enh;E028,6_EnhG;E049,6_EnhG;E055,2_TssAFlnk;E056,7_Enh;E059,7_Enh;E061,7_Enh;E067,7_Enh;E071,7_Enh;E072,6_EnhG;E119,6_EnhG;E126,7_Enh;E128,7_Enh;E129,6_EnhG		E028;E056;E059
8	previously not reported	GJA5	1:146598683:A:G	rs112057010	1	146598683	G	A	1:146737343:A:C	rs17356219	1	146737343	A	C	0.842092	E025,6_EnhG;E061,7_Enh;E067,7_Enh;E069,7_Enh;E071,7_Enh;E072,7_Enh;E074,7_Enh
8	previously not reported	GJA5	1:146598683:A:G	rs112057010	1	146598683	G	A	1:146738743:A:G	rs72691041	1	146738743	G	A	0.847013	E061,7_Enh;E069,7_Enh;E074,7_Enh
8	previously not reported	GJA5	1:146598683:A:G	rs112057010	1	146598683	G	A	1:146745375:G:T	rs4950316	1	146745375	G	T	0.847013	E001,7_Enh;E010,6_EnhG;E013,6_EnhG;E014,6_EnhG;E017,1_TssA;E023,2_TssAFlnk;E025,1_TssA;E026,2_TssAFlnk;E028,7_Enh;E049,2_TssAFlnk;E052,7_Enh;E055,1_TssA;E056,7_Enh;E058,6_EnhG;E061,2_TssAFlnk;E066,7_Enh;E067,6_EnhG;E072,7_Enh;E074,7_Enh;E076,7_Enh;E078,6_EnhG;E104,1_TssA;E114,3_TxFlnk;E117,2_TssAFlnk;E119,7_Enh;E120,6_EnhG;E121,2_TssAFlnk;E122,7_Enh;E123,6_EnhG;E125,6_EnhG;E126,1_TssA;E127,7_Enh;…	E104,1_TssA	E006;E017;E028;E055;E057;E059;E097;E117;E119;E121;E122;E126;E128
8	previously not reported	GJA5	1:146598683:A:G	rs112057010	1	146598683	G	A	1:146749181:C:T	rs2354428	1	146749181	T	C	0.842092	E061,6_EnhG
8	previously not reported	GJA5	1:146598683:A:G	rs112057010	1	146598683	G	A	1:146758285:D:I	rs147488881	1	146758285	I	T	0.803788	E030,7_Enh;E066,6_EnhG
8	previously not reported	GJA5	1:146598683:A:G	rs112057010	1	146598683	G	A	1:146759306:C:T	rs6703892	1	146759306	T	C	0.832363	E066,6_EnhG		E128
8	previously not reported	GJA5	1:146598683:A:G	rs112057010	1	146598683	G	A	1:146764675:D:I	rs150304546	1	146764675	I	A	0.837205	E006,6_EnhG;E017,7_Enh;E023,7_Enh;E025,7_Enh;E026,7_Enh;E028,6_EnhG;E049,7_Enh;E052,6_EnhG;E055,7_Enh;E120,7_Enh;E121,7_Enh;E125,7_Enh;E126,6_EnhG;E128,7_Enh;E129,7_Enh		E006;E017;E028;E055;E056;E057;E059;E119;E120;E121;E125;E126;E128
8	previously not reported	GJA5	1:146598683:A:G	rs72692920	1	146598683	G	A	1:146780214:C:T		1	146780214	C	T	0.832351			E021
8	previously not reported	GJA5	1:146598683:A:G	rs112057010	1	146598683	G	A	1:146787953:A:G	rs4950318	1	146787953	A	G	0.832351	E022,7_Enh
8	previously not reported	GJA5	1:146598683:A:G	rs112057010	1	146598683	G	A	1:146787963:C:T	rs4950319	1	146787963	T	C	0.832351	E022,7_Enh
8	previously not reported	GJA5	1:146598683:A:G	rs112057010	1	146598683	G	A	1:146802821:C:G	rs72692963	1	146802821	G	C	0.832351	E014,7_Enh
8	previously not reported	GJA5	1:146598683:A:G	rs112057010	1	146598683	G	A	1:146805238:A:G	rs72692975	1	146805238	G	A	0.832351	E054,7_Enh
8	previously not reported	GJA5	1:146598683:A:G	rs112057010	1	146598683	G	A	1:146807614:C:G	rs4950409	1	146807614	G	C	0.832351	E001,7_Enh;E008,7_Enh;E014,7_Enh;E015,7_Enh;E016,7_Enh;E018,7_Enh;E019,7_Enh;E020,7_Enh;E053,7_Enh;E054,7_Enh
8	previously not reported	GJA5	1:146598683:A:G	rs112057010	1	146598683	G	A	1:146807832:C:T	rs72692979	1	146807832	T	C	0.832351	E001,7_Enh;E012,7_Enh;E014,7_Enh;E015,7_Enh;E016,7_Enh;E018,7_Enh;E019,7_Enh;E020,2_TssAFlnk;E053,7_Enh;E054,7_Enh
8	previously not reported	GJA5	1:146598683:A:G	rs112057010	1	146598683	G	A	1:146809568:A:G	rs72692980	1	146809568	A	G	0.832351	E010,7_Enh;E012,7_Enh;E025,7_Enh;E053,7_Enh;E054,7_Enh;E086,7_Enh
8	previously not reported	GJA5	1:147281349:C:T	rs1692144	1	147281349	C	T	1:147281349:C:T	rs1692144	1	147281349	C	T	1	E086,7_Enh;E088,7_Enh		E088
9	previously not reported	DPT	1:168692137:C:G	rs531706	1	168692137	C	G	1:168689291:A:C	rs635954	1	168689291	C	A	0.992239	E005,7_Enh;E028,7_Enh;E049,7_Enh;E057,7_Enh;E058,7_Enh;E083,7_Enh;E116,2_TssAFlnk;E117,7_Enh;E118,7_Enh;E119,7_Enh;E127,7_Enh	E083,7_Enh	E116
9	previously not reported	DPT	1:168692137:C:G	rs531706	1	168692137	C	G	1:168691851:C:T	rs528953	1	168691851	T	C	0.995341	E083,7_Enh	E083,7_Enh
9	previously not reported	DPT	1:168692137:C:G	rs531706	1	168692137	C	G	1:168692137:C:G	rs531706	1	168692137	C	G	1	E083,7_Enh;E100,7_Enh	E083,7_Enh	E083	E083
9	previously not reported	DPT	1:168692137:C:G	rs531706	1	168692137	C	G	1:168692244:C:T	rs553721	1	168692244	C	T	0.84395	E083,7_Enh;E098,7_Enh;E100,7_Enh;E107,7_Enh;E108,7_Enh	E083,7_Enh	E083	E083
9	previously not reported	DPT	1:168692137:C:G	rs531706	1	168692137	C	G	1:168692515:C:G	rs681316	1	168692515	G	C	0.843436	E083,7_Enh;E098,7_Enh;E100,7_Enh;E107,7_Enh;E108,7_Enh	E083,7_Enh	E083	E083
10	previously not reported	PRRX1	1:170615660:C:G	rs61824886	1	170615660	C	G	1:170564139:D:I	rs11303388	1	170564139	I	C	0.807079	E126,7_Enh
10	previously not reported	PRRX1	1:170615660:C:G	rs61824886	1	170615660	C	G	1:170564829:A:G	rs502706	1	170564829	A	G	0.809159	E126,7_Enh
10	previously not reported	PRRX1	1:170615660:C:G	rs61824886	1	170615660	C	G	1:170573848:C:T	rs12128300	1	170573848	C	T	0.895914	E049,7_Enh;E129,7_Enh
10	previously not reported	PRRX1	1:170615660:C:G	rs567852	1	170615660	C	G	1:170583409:C:T		1	170583409	T	C	0.815099			E100
10	previously not reported	PRRX1	1:170615660:C:G	rs61824886	1	170615660	C	G	1:170585471:C:T	rs621240	1	170585471	C	T	0.815809	E027,7_Enh
10	previously not reported	PRRX1	1:170615660:C:G	rs61824886	1	170615660	C	G	1:170586551:C:G	rs7541071	1	170586551	C	G	0.895001	E027,7_Enh;E049,7_Enh;E061,7_Enh;E083,7_Enh;E108,7_Enh	E083,7_Enh
10	previously not reported	PRRX1	1:170615660:C:G	rs61824886	1	170615660	C	G	1:170590849:A:G	rs7537420	1	170590849	G	A	0.902156	E055,7_Enh
10	previously not reported	PRRX1	1:170615660:C:G	rs61824886	1	170615660	C	G	1:170592385:C:T	rs502479	1	170592385	C	T	0.81668	E023,7_Enh;E025,7_Enh;E052,7_Enh;E055,7_Enh;E119,7_Enh;E127,7_Enh;E128,7_Enh;E129,7_Enh		E006;E017;E028;E055;E056;E057;E059;E100;E119;E120;E125;E126;E127;E128
10	previously not reported	PRRX1	1:170615660:C:G	rs61824886	1	170615660	C	G	1:170605146:C:T	rs6665169	1	170605146	C	T	0.919579	E055,7_Enh;E115,7_Enh
10	previously not reported	PRRX1	1:170615660:C:G	rs61824886	1	170615660	C	G	1:170611354:A:G	rs61824885	1	170611354	A	G	0.951019	E115,2_TssAFlnk
10	previously not reported	PRRX1	1:170615660:C:G	rs61824886	1	170615660	C	G	1:170627172:A:G	rs61817372	1	170627172	A	G	0.802514	E017,7_Enh;E115,7_Enh
10	previously not reported	PRRX1	1:170665348:C:T	rs61817383	1	170665348	C	T	1:170644498:A:G	rs61817379	1	170644498	A	G	0.861106	E023,2_TssAFlnk;E025,3_TxFlnk;E026,2_TssAFlnk;E049,2_TssAFlnk;E052,7_Enh;E107,7_Enh;E125,7_Enh;E126,2_TssAFlnk;E128,7_Enh;E129,7_Enh
10	previously not reported	PRRX1	1:170665348:C:T	rs61817383	1	170665348	C	T	1:170645473:D:I	rs5778675	1	170645473	D	I	0.857405	E023,2_TssAFlnk;E025,3_TxFlnk;E026,7_Enh;E049,2_TssAFlnk;E052,7_Enh;E056,7_Enh;E097,1_TssA;E107,7_Enh;E115,7_Enh;E125,7_Enh;E126,6_EnhG;E128,7_Enh;E129,7_Enh
10	previously not reported	PRRX1	1:170665348:C:T	rs61817383	1	170665348	C	T	1:170645489:C:T	rs2150026	1	170645489	T	C	0.865439	E023,2_TssAFlnk;E025,3_TxFlnk;E026,7_Enh;E049,2_TssAFlnk;E052,7_Enh;E056,7_Enh;E097,1_TssA;E107,7_Enh;E115,7_Enh;E125,7_Enh;E126,6_EnhG;E128,7_Enh;E129,7_Enh
10	previously not reported	PRRX1	1:170665348:C:T	rs61817383	1	170665348	C	T	1:170655027:D:I	rs11455495	1	170655027	D	I	0.863256	E009,7_Enh;E010,2_TssAFlnk;E023,2_TssAFlnk;E025,3_TxFlnk;E026,2_TssAFlnk;E049,2_TssAFlnk;E055,7_Enh;E107,7_Enh;E108,7_Enh;E126,2_TssAFlnk;E128,7_Enh;E129,7_Enh
10	previously not reported	PRRX1	1:170665348:C:T	rs61817383	1	170665348	C	T	1:170657335:A:C	rs17550940	1	170657335	A	C	0.893838	E023,7_Enh;E025,2_TssAFlnk;E026,7_Enh;E049,7_Enh;E056,7_Enh;E074,7_Enh;E126,7_Enh;E129,7_Enh
10	previously not reported	PRRX1	1:170665348:C:T	rs61817383	1	170665348	C	T	1:170659832:D:I	rs111874715	1	170659832	I	T	0.956729	E023,7_Enh;E025,6_EnhG;E026,7_Enh;E049,7_Enh;E055,7_Enh;E056,7_Enh;E108,7_Enh;E126,7_Enh;E129,7_Enh
10	previously not reported	PRRX1	1:170665348:C:T	rs61817383	1	170665348	C	T	1:170661470:A:G	rs4656221	1	170661470	A	G	0.985301	E017,7_Enh;E023,7_Enh;E025,7_Enh;E026,7_Enh;E049,7_Enh;E052,7_Enh;E063,7_Enh;E107,7_Enh;E108,7_Enh;E126,7_Enh;E129,7_Enh
10	previously not reported	PRRX1	1:170665348:C:T	rs61817383	1	170665348	C	T	1:170661688:A:T	rs4656222	1	170661688	T	A	0.985301	E017,7_Enh;E023,7_Enh;E025,7_Enh;E026,7_Enh;E027,7_Enh;E049,7_Enh;E052,7_Enh;E063,7_Enh;E083,7_Enh;E107,7_Enh;E108,7_Enh;E126,7_Enh;E128,7_Enh;E129,7_Enh	E083,7_Enh
10	previously not reported	PRRX1	1:170665348:C:T	rs61817383	1	170665348	C	T	1:170662120:A:G	rs61817382	1	170662120	A	G	0.985301	E017,7_Enh;E023,2_TssAFlnk;E025,7_Enh;E026,2_TssAFlnk;E027,7_Enh;E049,2_TssAFlnk;E052,7_Enh;E054,7_Enh;E063,7_Enh;E070,7_Enh;E071,7_Enh;E081,12_EnhBiv;E083,7_Enh;E090,7_Enh;E100,7_Enh;E107,7_Enh;E108,7_Enh;E121,7_Enh;E122,7_Enh;E125,2_TssAFlnk;E126,2_TssAFlnk;E127,7_Enh;E128,7_Enh;E129,7_Enh	E083,7_Enh	E017;E055;E056;E081;E090;E125;E126;E128
10	previously not reported	PRRX1	1:170665348:C:T	rs61817383	1	170665348	C	T	1:170665348:C:T	rs61817383	1	170665348	C	T	1	E007,7_Enh;E023,2_TssAFlnk;E025,3_TxFlnk;E026,7_Enh;E027,7_Enh;E049,7_Enh;E052,7_Enh;E055,6_EnhG;E061,7_Enh;E067,7_Enh;E069,7_Enh;E071,7_Enh;E074,7_Enh;E083,7_Enh;E090,7_Enh;E107,7_Enh;E108,7_Enh;E121,7_Enh;E126,7_Enh;E128,7_Enh;E129,7_Enh	E083,7_Enh	E082;E089;E128
10	previously not reported	PRRX1	1:170665348:C:T	rs61817383	1	170665348	C	T	1:170671541:A:G	rs61817384	1	170671541	G	A	0.870537	E023,7_Enh;E025,6_EnhG;E027,7_Enh;E049,6_EnhG;E055,6_EnhG;E058,7_Enh;E073,7_Enh;E090,6_EnhG;E107,7_Enh;E126,6_EnhG;E129,6_EnhG
10	previously not reported	PRRX1	1:170665348:C:T	rs61817383	1	170665348	C	T	1:170671962:G:T	rs17551016	1	170671962	G	T	0.870537	E023,7_Enh;E025,6_EnhG;E026,7_Enh;E049,6_EnhG;E070,7_Enh;E126,6_EnhG;E129,7_Enh
10	previously not reported	PRRX1	1:170665348:C:T	rs61817383	1	170665348	C	T	1:170672737:D:I	rs113880067	1	170672737	I	G	0.85072	E023,7_Enh;E025,6_EnhG;E026,7_Enh;E049,6_EnhG;E055,7_Enh;E108,7_Enh;E126,6_EnhG;E129,6_EnhG
10	previously not reported	PRRX1	1:170665348:C:T	rs61817383	1	170665348	C	T	1:170681971:A:C	rs61817386	1	170681971	C	A	0.866158	E023,7_Enh;E025,6_EnhG;E026,7_Enh;E049,6_EnhG;E052,7_Enh;E055,7_Enh;E056,7_Enh;E125,7_Enh;E126,6_EnhG;E128,6_EnhG;E129,7_Enh
10	previously not reported	PRRX1	1:170665348:C:T	rs61817383	1	170665348	C	T	1:170686662:C:T	rs59188802	1	170686662	T	C	0.852695	E013,7_Enh;E023,7_Enh;E025,6_EnhG;E026,7_Enh;E049,6_EnhG;E107,7_Enh;E126,6_EnhG
10	previously not reported	PRRX1	1:170665348:C:T	rs61817383	1	170665348	C	T	1:170688005:C:T	rs736022	1	170688005	C	T	0.852695	E023,6_EnhG;E025,6_EnhG;E049,6_EnhG;E107,6_EnhG;E126,6_EnhG
10	previously not reported	PRRX1	1:170665348:C:T	rs61817383	1	170665348	C	T	1:170691140:A:T	rs4656796	1	170691140	A	T	0.828419	E023,6_EnhG;E025,6_EnhG;E026,6_EnhG;E049,6_EnhG;E055,6_EnhG;E126,6_EnhG;E129,6_EnhG
10	previously not reported	PRRX1	1:170665348:C:T	rs61817383	1	170665348	C	T	1:170692104:C:T	rs17551172	1	170692104	C	T	0.847662	E023,6_EnhG;E025,6_EnhG;E049,6_EnhG;E055,6_EnhG
10	previously not reported	PRRX1	1:170665348:C:T	rs61817383	1	170665348	C	T	1:170699149:A:G	rs12409048	1	170699149	G	A	0.847662	E017,6_EnhG;E023,3_TxFlnk;E025,6_EnhG;E026,6_EnhG;E049,6_EnhG;E052,7_Enh;E055,6_EnhG;E056,6_EnhG;E081,7_Enh;E083,2_TssAFlnk;E089,1_TssA;E090,3_TxFlnk;E091,7_Enh;E095,7_Enh;E100,7_Enh;E104,7_Enh;E105,7_Enh;E107,7_Enh;E108,2_TssAFlnk;E121,7_Enh;E126,6_EnhG;E128,7_Enh;E129,3_TxFlnk	E083,2_TssAFlnk;E095,7_Enh;E104,7_Enh;E105,7_Enh	E055;E083;E089;E090;E100	E083
11	previously not reported	C1orf98	1:200271408:C:T	rs819636	1	200271408	C	T	1:200271408:C:T	rs819636	1	200271408	C	T	1	E001,10_TssBiv;E002,10_TssBiv;E003,10_TssBiv;E004,10_TssBiv;E005,11_BivFlnk;E006,1_TssA;E007,10_TssBiv;E008,10_TssBiv;E009,11_BivFlnk;E010,11_BivFlnk;E011,10_TssBiv;E012,11_BivFlnk;E013,1_TssA;E014,10_TssBiv;E015,10_TssBiv;E016,10_TssBiv;E017,1_TssA;E018,10_TssBiv;E019,10_TssBiv;E020,10_TssBiv;E021,1_TssA;E022,10_TssBiv;E023,1_TssA;E024,1_TssA;E025,1_TssA;E026,1_TssA;E027,1_TssA;E028,1_TssA;E029,…	E083,1_TssA;E095,1_TssA;E104,1_TssA;E105,1_TssA	E007;E022;E032;E033;E034;E046;E050;E051;E055;E056;E057;E059;E081;E082;E083;E088;E089;E090;E091;E092;E093;E097;E109;E116;E121;E122;E124	E083
12	previously not reported	HLX	1:221138612:C:T	rs10779417	1	221138612	T	C	1:221126914:A:G		1	221126914	G	A	0.954625			E120;E121
12	previously not reported	HLX	1:221138612:C:T	rs6678632	1	221138612	T	C	1:221134350:A:G	rs1414519	1	221134350	G	A	0.994484	E025,7_Enh;E052,7_Enh;E056,7_Enh;E126,7_Enh
12	previously not reported	HLX	1:221138612:C:T	rs10495159	1	221138612	T	C	1:221135671:A:G		1	221135671	A	G	0.994484			E006;E017;E028;E029;E055;E056;E057;E100;E114;E117;E119;E120;E121;E124;E125;E126;E128
12	previously not reported	HLX	1:221138612:C:T	rs6678632	1	221138612	T	C	1:221136642:C:T	rs1335927	1	221136642	C	T	0.994484	E025,7_Enh;E055,7_Enh;E119,7_Enh		E116
12	previously not reported	HLX	1:221138612:C:T	rs6678632	1	221138612	T	C	1:221136787:C:T	rs1335929	1	221136787	T	C	0.992896	E025,7_Enh;E055,7_Enh;E119,7_Enh
12	previously not reported	HLX	1:221138612:C:T	rs6678632	1	221138612	T	C	1:221140832:C:T	rs12022930	1	221140832	T	C	0.996062	E006,7_Enh;E017,7_Enh;E055,7_Enh;E056,7_Enh;E092,7_Enh;E095,7_Enh;E123,2_TssAFlnk;E126,7_Enh;E129,7_Enh	E095,7_Enh	E006;E055;E056;E059;E121
13	previously not reported	ADCK3	1:227173477:C:G	rs3768419	1	227173477	G	C	1:227171584:D:I	rs3215919	1	227171584	I	G	0.827186	E022,6_EnhG;E083,7_Enh;E089,6_EnhG;E095,6_EnhG;E104,7_Enh;E105,6_EnhG;E107,6_EnhG;E108,6_EnhG	E083,7_Enh;E095,6_EnhG;E104,7_Enh;E105,6_EnhG
13	previously not reported	ADCK3	1:227173477:C:G	rs3768419	1	227173477	G	C	1:227172903:A:G	rs2297415	1	227172903	G	A	0.879298	E071,7_Enh;E083,7_Enh;E089,6_EnhG;E090,6_EnhG;E091,7_Enh;E092,6_EnhG;E095,6_EnhG;E098,6_EnhG;E099,7_Enh;E104,7_Enh;E105,6_EnhG;E107,6_EnhG;E108,6_EnhG;E113,6_EnhG	E083,7_Enh;E095,6_EnhG;E104,7_Enh;E105,6_EnhG	E083;E089;E090;E121	E083
13	previously not reported	ADCK3	1:227173477:C:G	rs3768419	1	227173477	G	C	1:227172935:C:G	rs2297416	1	227172935	C	G	0.864723	E071,7_Enh;E083,7_Enh;E089,6_EnhG;E090,6_EnhG;E091,7_Enh;E092,6_EnhG;E095,6_EnhG;E098,6_EnhG;E099,7_Enh;E104,7_Enh;E105,6_EnhG;E107,6_EnhG;E108,6_EnhG;E113,6_EnhG	E083,7_Enh;E095,6_EnhG;E104,7_Enh;E105,6_EnhG	E083;E089;E090;E121	E083
13	previously not reported	ADCK3	1:227173477:C:G	rs3768419	1	227173477	G	C	1:227173477:C:G	rs3768419	1	227173477	G	C	1	E027,6_EnhG;E067,7_Enh;E068,7_Enh;E071,6_EnhG;E083,7_Enh;E089,6_EnhG;E090,3_TxFlnk;E091,6_EnhG;E095,6_EnhG;E098,6_EnhG;E104,7_Enh;E105,6_EnhG;E107,6_EnhG;E108,6_EnhG;E113,6_EnhG;E119,7_Enh;E123,7_Enh	E083,7_Enh;E095,6_EnhG;E104,7_Enh;E105,6_EnhG	E083	E083
13	previously not reported	ADCK3	1:227173477:C:G	rs3768419	1	227173477	G	C	1:227173892:A:T	rs17592479	1	227173892	T	A	0.890113	E027,6_EnhG;E028,7_Enh;E067,7_Enh;E068,7_Enh;E069,7_Enh;E071,6_EnhG;E072,7_Enh;E073,7_Enh;E079,6_EnhG;E083,7_Enh;E089,6_EnhG;E090,6_EnhG;E091,6_EnhG;E095,6_EnhG;E098,6_EnhG;E104,7_Enh;E105,6_EnhG;E107,6_EnhG;E108,6_EnhG;E111,6_EnhG;E113,6_EnhG;E119,7_Enh	E083,7_Enh;E095,6_EnhG;E104,7_Enh;E105,6_EnhG	E083	E083
13	previously not reported	ADCK3	1:227173477:C:G	rs3768419	1	227173477	G	C	1:227174210:C:T	rs3738725	1	227174210	T	C	0.901467	E022,6_EnhG;E067,7_Enh;E068,7_Enh;E069,7_Enh;E071,6_EnhG;E072,7_Enh;E073,7_Enh;E074,7_Enh;E075,6_EnhG;E079,6_EnhG;E083,7_Enh;E089,6_EnhG;E090,6_EnhG;E095,6_EnhG;E096,6_EnhG;E098,6_EnhG;E102,6_EnhG;E104,7_Enh;E105,6_EnhG;E107,6_EnhG;E108,6_EnhG;E111,6_EnhG;E113,6_EnhG;E119,7_Enh	E083,7_Enh;E095,6_EnhG;E104,7_Enh;E105,6_EnhG
13	previously not reported	ADCK3	1:227173477:C:G	rs3768419	1	227173477	G	C	1:227174823:D:I	rs11420839	1	227174823	D	I	0.995429	E022,6_EnhG;E050,6_EnhG;E051,6_EnhG;E067,7_Enh;E068,6_EnhG;E069,7_Enh;E071,6_EnhG;E072,6_EnhG;E073,7_Enh;E074,7_Enh;E075,6_EnhG;E079,6_EnhG;E083,7_Enh;E089,6_EnhG;E090,6_EnhG;E095,6_EnhG;E096,6_EnhG;E098,6_EnhG;E101,6_EnhG;E102,6_EnhG;E104,7_Enh;E105,6_EnhG;E107,6_EnhG;E108,6_EnhG;E110,7_Enh;E111,6_EnhG;E113,6_EnhG	E083,7_Enh;E095,6_EnhG;E104,7_Enh;E105,6_EnhG
13	previously not reported	ADCK3	1:227173477:C:G	rs3768419	1	227173477	G	C	1:227175245:D:I	rs3215920	1	227175245	D	I	0.816899	E005,6_EnhG;E022,6_EnhG;E050,6_EnhG;E051,6_EnhG;E063,6_EnhG;E067,7_Enh;E068,6_EnhG;E069,7_Enh;E071,6_EnhG;E072,6_EnhG;E073,7_Enh;E074,7_Enh;E075,6_EnhG;E077,6_EnhG;E079,6_EnhG;E084,6_EnhG;E088,6_EnhG;E089,6_EnhG;E094,6_EnhG;E095,6_EnhG;E096,6_EnhG;E098,6_EnhG;E101,6_EnhG;E102,6_EnhG;E105,6_EnhG;E106,6_EnhG;E107,6_EnhG;E108,6_EnhG;E110,7_Enh;E111,6_EnhG;E113,6_EnhG	E095,6_EnhG;E105,6_EnhG
13	previously not reported	ADCK3	1:227173477:C:G	rs3768419	1	227173477	G	C	1:227175367:G:T	rs6426558	1	227175367	G	T	0.846975	E005,6_EnhG;E022,6_EnhG;E050,6_EnhG;E051,6_EnhG;E063,6_EnhG;E067,7_Enh;E068,6_EnhG;E069,7_Enh;E071,6_EnhG;E072,6_EnhG;E073,7_Enh;E074,7_Enh;E075,6_EnhG;E077,6_EnhG;E079,6_EnhG;E084,6_EnhG;E088,6_EnhG;E089,6_EnhG;E094,6_EnhG;E095,6_EnhG;E096,6_EnhG;E098,6_EnhG;E101,6_EnhG;E102,6_EnhG;E105,6_EnhG;E106,6_EnhG;E107,6_EnhG;E108,6_EnhG;E110,7_Enh;E111,6_EnhG;E113,6_EnhG	E095,6_EnhG;E105,6_EnhG
13	previously not reported	ADCK3	1:227173477:C:G	rs10586161	1	227173477	G	C	1:227175967:D:I		1	227175967	I	C	0.994518			E085;E092
13	previously not reported	ADCK3	1:227173477:C:G	rs3768419	1	227173477	G	C	1:227176162:C:G	rs34267809	1	227176162	C	G	0.891154	E003,7_Enh;E011,7_Enh;E012,7_Enh;E016,7_Enh;E019,7_Enh;E022,6_EnhG;E024,7_Enh;E036,6_EnhG;E044,7_Enh;E049,7_Enh;E050,6_EnhG;E051,6_EnhG;E059,6_EnhG;E063,6_EnhG;E067,7_Enh;E068,6_EnhG;E069,7_Enh;E071,7_Enh;E072,6_EnhG;E073,7_Enh;E074,7_Enh;E075,7_Enh;E076,7_Enh;E077,7_Enh;E078,7_Enh;E084,7_Enh;E085,6_EnhG;E088,7_Enh;E091,6_EnhG;E092,6_EnhG;E094,7_Enh;E095,6_EnhG;E096,7_Enh;E098,7_Enh;E100,7_Enh;E1…	E095,6_EnhG;E105,7_Enh	E003;E022;E084;E088;E091;E092;E094;E098;E109
13	previously not reported	ADCK3	1:227173477:C:G	rs10586162	1	227173477	G	C	1:227176164:D:I		1	227176164	I	A	0.90986			E003;E022;E084;E088;E091;E092;E094;E098;E109
13	previously not reported	ADCK3	1:227173477:C:G	rs3768419	1	227173477	G	C	1:227177061:C:T	rs12406714	1	227177061	T	C	0.994518	E029,7_Enh;E030,7_Enh;E031,7_Enh;E032,7_Enh;E033,7_Enh;E034,7_Enh;E035,7_Enh;E036,6_EnhG;E037,7_Enh;E038,7_Enh;E039,7_Enh;E040,7_Enh;E041,7_Enh;E042,7_Enh;E043,7_Enh;E044,7_Enh;E046,7_Enh;E047,7_Enh;E050,7_Enh;E051,2_TssAFlnk;E063,7_Enh;E065,7_Enh;E067,7_Enh;E068,7_Enh;E069,7_Enh;E071,7_Enh;E072,7_Enh;E073,7_Enh;E074,7_Enh;E075,7_Enh;E076,7_Enh;E077,7_Enh;E078,7_Enh;E080,6_EnhG;E084,7_Enh;E085,6_…	E095,7_Enh;E104,7_Enh;E105,7_Enh	E050;E084;E085;E092;E094;E109;E120;E121;E124
13	previously not reported	ADCK3	1:227173477:C:G	rs3768419	1	227173477	G	C	1:227177193:A:G	rs3768421	1	227177193	G	A	0.969351	E029,7_Enh;E030,7_Enh;E031,7_Enh;E032,7_Enh;E033,7_Enh;E034,7_Enh;E035,7_Enh;E036,6_EnhG;E037,7_Enh;E038,7_Enh;E039,7_Enh;E040,7_Enh;E041,7_Enh;E042,7_Enh;E043,7_Enh;E044,7_Enh;E046,7_Enh;E047,7_Enh;E050,7_Enh;E051,2_TssAFlnk;E063,7_Enh;E065,7_Enh;E067,7_Enh;E068,7_Enh;E069,7_Enh;E071,7_Enh;E072,7_Enh;E073,7_Enh;E074,7_Enh;E075,7_Enh;E076,7_Enh;E077,7_Enh;E078,7_Enh;E080,6_EnhG;E084,7_Enh;E085,6_…	E095,7_Enh;E104,7_Enh;E105,7_Enh	E050;E084;E109
13	previously not reported	ADCK3	1:227173477:C:G	rs3768419	1	227173477	G	C	1:227177293:A:G	rs3768423	1	227177293	G	A	0.993599	E029,7_Enh;E030,2_TssAFlnk;E031,2_TssAFlnk;E032,7_Enh;E033,7_Enh;E034,7_Enh;E035,7_Enh;E036,7_Enh;E037,7_Enh;E038,7_Enh;E039,7_Enh;E040,7_Enh;E041,7_Enh;E042,7_Enh;E043,7_Enh;E044,7_Enh;E046,7_Enh;E047,7_Enh;E050,2_TssAFlnk;E051,2_TssAFlnk;E063,7_Enh;E067,7_Enh;E068,7_Enh;E069,7_Enh;E071,7_Enh;E072,7_Enh;E073,7_Enh;E074,7_Enh;E075,7_Enh;E076,7_Enh;E077,7_Enh;E078,7_Enh;E080,6_EnhG;E083,7_Enh;E084…	E083,7_Enh;E095,7_Enh;E104,7_Enh;E105,7_Enh	E050
13	previously not reported	ADCK3	1:227173477:C:G	rs3768419	1	227173477	G	C	1:227177444:A:G	rs3768424	1	227177444	A	G	0.900337	E029,7_Enh;E030,2_TssAFlnk;E031,2_TssAFlnk;E032,7_Enh;E033,7_Enh;E034,7_Enh;E035,7_Enh;E036,7_Enh;E037,7_Enh;E038,7_Enh;E039,7_Enh;E040,7_Enh;E041,7_Enh;E042,7_Enh;E043,7_Enh;E044,7_Enh;E046,7_Enh;E047,7_Enh;E050,2_TssAFlnk;E051,2_TssAFlnk;E068,7_Enh;E069,7_Enh;E071,7_Enh;E072,7_Enh;E073,7_Enh;E074,7_Enh;E075,7_Enh;E076,7_Enh;E077,7_Enh;E078,7_Enh;E080,6_EnhG;E083,7_Enh;E084,7_Enh;E085,6_EnhG;E09…	E083,7_Enh;E095,7_Enh;E104,7_Enh;E105,7_Enh	E050;E051;E124
13	previously not reported	ADCK3	1:227173477:C:G	rs1045287	1	227173477	G	C	1:227178962:C:T		1	227178962	T	C	0.883858			E123
13	previously not reported	ADCK3	1:227173477:C:G	rs3768419	1	227173477	G	C	1:227179501:D:I	rs138094768	1	227179501	I	A	0.883858	E030,7_Enh;E084,7_Enh;E085,6_EnhG;E123,6_EnhG
13	previously not reported	ADCK3	1:227173477:C:G	rs3768419	1	227173477	G	C	1:227180947:A:C	rs3795445	1	227180947	A	C	0.994518	E012,7_Enh;E073,7_Enh;E081,7_Enh;E083,7_Enh;E084,7_Enh;E085,6_EnhG;E087,7_Enh	E083,7_Enh
13	previously not reported	ADCK3	1:227173477:C:G	rs3768419	1	227173477	G	C	1:227180981:C:T	rs3795446	1	227180981	T	C	0.994518	E012,7_Enh;E073,7_Enh;E081,7_Enh;E083,7_Enh;E084,7_Enh;E085,6_EnhG;E087,7_Enh	E083,7_Enh
13	previously not reported	ADCK3	1:227173477:C:G	rs1062908	1	227173477	G	C	1:227181554:C:G		1	227181554	C	G	0.879768			E080;E081;E082;E083	E083
13	previously not reported	ADCK3	1:227173477:C:G	rs3768419	1	227173477	G	C	1:227181838:G:T	rs3795449	1	227181838	T	G	0.883858	E003,7_Enh;E006,6_EnhG;E007,7_Enh;E011,7_Enh;E012,7_Enh;E014,7_Enh;E019,7_Enh;E021,7_Enh;E022,7_Enh;E024,7_Enh;E063,6_EnhG;E067,7_Enh;E069,6_EnhG;E071,7_Enh;E072,7_Enh;E073,7_Enh;E074,7_Enh;E081,7_Enh;E082,7_Enh;E083,7_Enh;E084,6_EnhG;E085,6_EnhG;E086,7_Enh;E089,6_EnhG;E090,6_EnhG;E094,6_EnhG;E095,6_EnhG;E096,6_EnhG;E104,7_Enh;E105,6_EnhG;E108,7_Enh;E111,6_EnhG;E118,2_TssAFlnk	E083,7_Enh;E095,6_EnhG;E104,7_Enh;E105,6_EnhG	E003;E080;E083;E084;E088;E090;E092;E118	E083
13	previously not reported	ADCK3	1:227173477:C:G	rs3768419	1	227173477	G	C	1:227181923:C:T	rs3795451	1	227181923	C	T	0.805382	E003,7_Enh;E006,6_EnhG;E007,7_Enh;E011,7_Enh;E012,7_Enh;E014,7_Enh;E019,7_Enh;E021,7_Enh;E022,7_Enh;E024,7_Enh;E063,6_EnhG;E067,7_Enh;E069,6_EnhG;E071,7_Enh;E072,7_Enh;E073,7_Enh;E074,7_Enh;E081,7_Enh;E082,7_Enh;E083,7_Enh;E084,6_EnhG;E085,6_EnhG;E086,7_Enh;E089,6_EnhG;E090,6_EnhG;E094,6_EnhG;E095,6_EnhG;E096,6_EnhG;E104,7_Enh;E105,6_EnhG;E108,7_Enh;E111,6_EnhG;E118,2_TssAFlnk	E083,7_Enh;E095,6_EnhG;E104,7_Enh;E105,6_EnhG	E003;E007;E083;E088;E118	E083
13	previously not reported	ADCK3	1:227173477:C:G	rs3768419	1	227173477	G	C	1:227183125:C:T	rs1343743	1	227183125	C	T	0.882034	E001,7_Enh;E003,7_Enh;E007,7_Enh;E009,7_Enh;E010,7_Enh;E011,7_Enh;E012,7_Enh;E014,7_Enh;E016,7_Enh;E019,7_Enh;E021,7_Enh;E022,7_Enh;E024,7_Enh;E044,7_Enh;E067,7_Enh;E069,7_Enh;E071,7_Enh;E072,6_EnhG;E073,7_Enh;E074,7_Enh;E083,7_Enh;E093,7_Enh;E104,7_Enh;E116,2_TssAFlnk;E118,7_Enh	E083,7_Enh;E104,7_Enh
13	previously not reported	ADCK3	1:227173477:C:G	rs3768419	1	227173477	G	C	1:227183434:C:T	rs6664955	1	227183434	T	C	0.883858	E001,7_Enh;E003,7_Enh;E009,7_Enh;E010,7_Enh;E011,7_Enh;E012,7_Enh;E014,7_Enh;E016,7_Enh;E019,7_Enh;E020,7_Enh;E024,7_Enh;E044,7_Enh;E069,7_Enh;E071,7_Enh;E074,7_Enh;E083,7_Enh;E116,7_Enh;E118,7_Enh	E083,7_Enh	E003;E022;E083;E116	E083
13	previously not reported	ADCK3	1:227173477:C:G	rs10916075	1	227173477	G	C	1:227184074:A:G		1	227184074	G	A	0.860695			E123
13	previously not reported	ADCK3	1:227173477:C:G	rs7541033	1	227173477	G	C	1:227188371:A:C		1	227188371	C	A	0.859854			E034
13	previously not reported	ADCK3	1:227173477:C:G	rs3768419	1	227173477	G	C	1:227190233:A:G	rs6684821	1	227190233	G	A	0.859854	E079,6_EnhG;E095,6_EnhG;E104,7_Enh	E095,6_EnhG;E104,7_Enh
13	previously not reported	ADCK3	1:227173477:C:G	rs3768419	1	227173477	G	C	1:227192579:A:C	rs2297418	1	227192579	A	C	0.876418	E083,7_Enh;E094,6_EnhG	E083,7_Enh
14	previously not reported	SIPA1L2	1:232712145:A:G	rs1285678	1	232712145	A	G	1:232712145:A:G	rs1285678	1	232712145	A	G	1	E004,7_Enh;E011,6_EnhG;E013,6_EnhG;E015,7_Enh;E016,7_Enh;E030,7_Enh;E053,7_Enh;E054,7_Enh;E061,7_Enh;E083,7_Enh;E096,7_Enh;E115,7_Enh	E083,7_Enh
14	previously not reported	SIPA1L2	1:232712145:A:G	rs1285678	1	232712145	A	G	1:232712355:A:C	rs1285677	1	232712355	A	C	0.861772	E004,7_Enh;E007,7_Enh;E011,7_Enh;E013,6_EnhG;E015,7_Enh;E016,7_Enh;E030,7_Enh;E045,7_Enh;E053,7_Enh;E054,7_Enh;E061,7_Enh;E083,7_Enh;E096,7_Enh;E115,7_Enh	E083,7_Enh
14	previously not reported	SIPA1L2	1:232712145:A:G	rs1285678	1	232712145	A	G	1:232712430:C:T	rs1285676	1	232712430	C	T	0.916979	E004,7_Enh;E007,7_Enh;E010,7_Enh;E011,7_Enh;E014,7_Enh;E015,7_Enh;E016,7_Enh;E019,7_Enh;E030,7_Enh;E033,7_Enh;E053,7_Enh;E054,7_Enh;E061,7_Enh;E083,7_Enh;E088,7_Enh;E096,7_Enh;E115,7_Enh	E083,7_Enh	E088;E094
15	previously not reported	RYR2	1:237194922:A:G	rs10802580	1	237194922	A	G	1:237194922:A:G		1	237194922	A	G	1			E004;E005;E055;E083;E088;E091;E098;E117;E126	E083
16	previously not reported	SMYD3	1:246157144:A:G	rs10924423	1	246157144	G	A	1:246152864:C:T		1	246152864	T	C	0.960987			E034;E123
16	previously not reported	SMYD3	1:246157144:A:G	rs28468565	1	246157144	G	A	1:246153301:A:G	rs4512612	1	246153301	G	A	0.961725	E110,7_Enh;E116,7_Enh;E123,7_Enh
16	previously not reported	SMYD3	1:246157144:A:G	rs28468565	1	246157144	G	A	1:246153496:C:T	rs4600012	1	246153496	T	C	0.960965	E110,7_Enh;E116,7_Enh;E123,7_Enh
16	previously not reported	SMYD3	1:246157144:A:G	rs10802309	1	246157144	G	A	1:246153941:C:T		1	246153941	T	C	0.981328			E085;E092;E116;E123
16	previously not reported	SMYD3	1:246157144:A:G	rs10924426	1	246157144	G	A	1:246154092:C:T		1	246154092	T	C	0.981328			E084;E085;E092;E109;E116;E123
16	previously not reported	SMYD3	1:246157144:A:G	rs10924427	1	246157144	G	A	1:246154139:C:T		1	246154139	T	C	0.981328			E046;E084;E092;E109;E116;E123
16	previously not reported	SMYD3	1:246157144:A:G	rs28468565	1	246157144	G	A	1:246154427:A:C	rs12120097	1	246154427	A	C	0.981328	E005,7_Enh;E029,7_Enh;E032,7_Enh;E046,7_Enh;E083,7_Enh;E084,7_Enh;E085,7_Enh;E091,7_Enh;E102,7_Enh;E109,7_Enh;E110,7_Enh;E116,7_Enh;E118,7_Enh;E123,7_Enh	E083,7_Enh
16	previously not reported	SMYD3	1:246157144:A:G	rs28468565	1	246157144	G	A	1:246154599:C:T	rs12116734	1	246154599	T	C	0.981328	E005,7_Enh;E029,7_Enh;E032,7_Enh;E046,7_Enh;E083,7_Enh;E084,7_Enh;E085,7_Enh;E091,7_Enh;E102,7_Enh;E109,7_Enh;E110,7_Enh;E116,7_Enh;E118,7_Enh;E123,7_Enh	E083,7_Enh	E123
16	previously not reported	SMYD3	1:246157144:A:G	rs28468565	1	246157144	G	A	1:246154664:A:G	rs11578374	1	246154664	A	G	0.981328	E005,7_Enh;E032,7_Enh;E046,7_Enh;E083,7_Enh;E084,7_Enh;E085,7_Enh;E091,7_Enh;E099,7_Enh;E102,7_Enh;E105,7_Enh;E110,7_Enh;E123,7_Enh	E083,7_Enh;E105,7_Enh	E005;E084;E091;E123
16	previously not reported	SMYD3	1:246157144:A:G	rs28468565	1	246157144	G	A	1:246155107:G:T	rs12117603	1	246155107	T	G	0.951477	E123,7_Enh
16	previously not reported	SMYD3	1:246157144:A:G	rs28468565	1	246157144	G	A	1:246155112:A:G	rs12121035	1	246155112	A	G	0.951477	E123,7_Enh
16	previously not reported	SMYD3	1:246157144:A:G	rs28468565	1	246157144	G	A	1:246157628:C:G	rs28556941	1	246157628	G	C	0.997101	E021,7_Enh		E092
16	previously not reported	SMYD3	1:246157144:A:G	rs28468565	1	246157144	G	A	1:246160488:A:G	rs12094306	1	246160488	G	A	0.959721	E001,7_Enh;E003,7_Enh;E005,7_Enh;E006,7_Enh;E008,7_Enh;E015,7_Enh;E017,7_Enh;E018,7_Enh;E021,7_Enh;E022,7_Enh;E024,7_Enh;E053,7_Enh;E057,7_Enh;E059,7_Enh;E082,7_Enh;E083,7_Enh;E090,7_Enh	E083,7_Enh
16	previously not reported	SMYD3	1:246157144:A:G	rs28468565	1	246157144	G	A	1:246160533:A:G	rs36047166	1	246160533	A	G	0.960411	E001,7_Enh;E003,7_Enh;E005,7_Enh;E006,7_Enh;E008,7_Enh;E015,7_Enh;E017,7_Enh;E018,7_Enh;E021,7_Enh;E022,7_Enh;E024,7_Enh;E053,7_Enh;E057,7_Enh;E059,7_Enh;E082,7_Enh;E083,7_Enh;E090,7_Enh	E083,7_Enh
16	previously not reported	SMYD3	1:246157144:A:G	rs28468565	1	246157144	G	A	1:246160564:C:T	rs35354121	1	246160564	T	C	0.959721	E001,7_Enh;E003,7_Enh;E005,7_Enh;E006,7_Enh;E008,7_Enh;E015,7_Enh;E017,7_Enh;E018,7_Enh;E021,7_Enh;E022,7_Enh;E024,7_Enh;E053,7_Enh;E057,7_Enh;E059,7_Enh;E082,7_Enh;E083,7_Enh;E090,7_Enh	E083,7_Enh
16	previously not reported	SMYD3	1:246157144:A:G	rs28468565	1	246157144	G	A	1:246160612:A:G	rs36107675	1	246160612	A	G	0.952172	E001,7_Enh;E003,7_Enh;E005,7_Enh;E006,7_Enh;E008,7_Enh;E013,7_Enh;E015,7_Enh;E017,7_Enh;E018,7_Enh;E021,7_Enh;E022,7_Enh;E024,7_Enh;E025,7_Enh;E028,7_Enh;E052,7_Enh;E053,7_Enh;E057,7_Enh;E059,7_Enh;E061,7_Enh;E082,7_Enh;E083,7_Enh;E090,7_Enh;E105,7_Enh;E119,7_Enh;E123,7_Enh;E125,7_Enh;E127,7_Enh;E129,7_Enh	E083,7_Enh;E105,7_Enh	E083	E083
16	previously not reported	SMYD3	1:246157144:A:G	rs28468565	1	246157144	G	A	1:246161101:G:T	rs35099039	1	246161101	T	G	0.959675	E001,7_Enh;E003,7_Enh;E005,7_Enh;E006,7_Enh;E008,7_Enh;E013,7_Enh;E015,7_Enh;E017,7_Enh;E018,7_Enh;E021,7_Enh;E022,7_Enh;E025,7_Enh;E026,7_Enh;E027,7_Enh;E028,7_Enh;E036,7_Enh;E052,7_Enh;E053,7_Enh;E055,7_Enh;E056,7_Enh;E057,7_Enh;E058,7_Enh;E070,7_Enh;E073,7_Enh;E076,7_Enh;E079,7_Enh;E082,7_Enh;E083,2_TssAFlnk;E090,7_Enh;E094,7_Enh;E095,7_Enh;E096,7_Enh;E098,7_Enh;E104,7_Enh;E110,7_Enh;E111,7_En…	E083,2_TssAFlnk;E095,7_Enh;E104,7_Enh	E005;E028;E057;E083;E125;E128	E083
16	previously not reported	SMYD3	1:246157144:A:G	rs28468565	1	246157144	G	A	1:246161494:C:T	rs12118500	1	246161494	T	C	0.958984	E005,7_Enh;E013,7_Enh;E017,7_Enh;E025,7_Enh;E028,7_Enh;E055,7_Enh;E056,7_Enh;E057,7_Enh;E058,7_Enh;E083,7_Enh;E104,7_Enh;E110,7_Enh;E119,7_Enh;E121,7_Enh;E123,7_Enh;E125,7_Enh;E127,7_Enh;E128,7_Enh;E129,7_Enh	E083,7_Enh;E104,7_Enh	E028;E057;E083;E125;E128	E083
16	previously not reported	SMYD3	1:246157144:A:G	rs28468565	1	246157144	G	A	1:246163381:C:T	rs12120498	1	246163381	T	C	0.980059	E051,7_Enh;E059,7_Enh;E061,7_Enh;E102,7_Enh;E110,1_TssA		E059;E116
16	previously not reported	SMYD3	1:246157144:A:G	rs28468565	1	246157144	G	A	1:246164839:D:I	rs150069389	1	246164839	D	I	0.971289	E005,7_Enh;E017,7_Enh;E026,7_Enh;E028,7_Enh;E049,7_Enh;E052,7_Enh;E057,7_Enh;E058,7_Enh;E088,7_Enh;E092,7_Enh;E110,7_Enh;E119,7_Enh;E125,7_Enh;E126,7_Enh;E127,7_Enh;E129,7_Enh		E006;E017;E028;E055;E057;E059;E086;E088;E090;E125;E127;E128
17	previously not reported	LINC01249	2:4824622:A:G	rs12616546	2	4824622	G	A	2:4824073:A:G	rs1470475	2	4824073	A	G	0.855555	E010,7_Enh
18	previously not reported	STRN	2:37102249:A:G	rs17496249	2	37102249	A	G	2:37067137:A:G	rs7600413	2	37067137	A	G	0.889741	E012,7_Enh;E014,7_Enh;E016,7_Enh;E018,7_Enh;E063,7_Enh
18	previously not reported	STRN	2:37102249:A:G	rs711244	2	37102249	A	G	2:37068428:C:T		2	37068428	C	T	0.887082			E059;E080;E097
18	previously not reported	STRN	2:37102249:A:G	rs17496249	2	37102249	A	G	2:37081212:D:I	rs5830444	2	37081212	D	I	0.908343	E011,6_EnhG;E028,7_Enh;E119,7_Enh;E127,7_Enh
18	previously not reported	STRN	2:37102249:A:G	rs17496249	2	37102249	A	G	2:37117073:C:T	rs888083	2	37117073	C	T	0.861126	E017,1_TssA;E023,2_TssAFlnk;E025,1_TssA;E026,2_TssAFlnk;E029,6_EnhG;E030,7_Enh;E049,2_TssAFlnk;E052,7_Enh;E067,7_Enh;E068,7_Enh;E069,7_Enh;E072,2_TssAFlnk;E074,7_Enh;E080,7_Enh;E084,7_Enh;E085,7_Enh;E101,1_TssA;E114,2_TssAFlnk;E117,2_TssAFlnk;E120,7_Enh;E122,2_TssAFlnk;E124,7_Enh;E125,2_TssAFlnk;E126,2_TssAFlnk;E127,7_Enh;E128,2_TssAFlnk;E129,2_TssAFlnk		E006;E017;E028;E029;E046;E050;E055;E056;E057;E084;E085;E092;E094;E100;E109;E114;E117;E119;E120;E121;E122;E124;E125;E126;E127;E128
18	previously not reported	STRN	2:37102249:A:G	rs17496249	2	37102249	A	G	2:37117502:C:G	rs17443495	2	37117502	G	C	0.877844	E023,2_TssAFlnk;E025,2_TssAFlnk;E026,2_TssAFlnk;E030,7_Enh;E049,2_TssAFlnk;E052,2_TssAFlnk;E055,1_TssA;E057,1_TssA;E058,7_Enh;E069,7_Enh;E072,7_Enh;E074,7_Enh;E080,7_Enh;E101,1_TssA;E102,7_Enh;E110,7_Enh;E114,2_TssAFlnk;E117,7_Enh;E119,7_Enh;E120,7_Enh;E121,7_Enh;E122,2_TssAFlnk;E124,7_Enh;E125,7_Enh;E126,2_TssAFlnk;E127,2_TssAFlnk;E128,7_Enh;E129,7_Enh		E006;E057;E122;E125
18	previously not reported	STRN	2:37102249:A:G	rs17496249	2	37102249	A	G	2:37152899:C:G	rs2372785	2	37152899	G	C	0.840009	E122,7_Enh
19	previously not reported	EML4	2:42537995:A:C	rs6728830	2	42537995	A	C	2:42537995:A:C	rs6728830	2	42537995	A	C	1	E098,7_Enh
20	previously not reported	EPAS1	2:46533376:C:T	rs11894252	2	46533376	T	C	2:46533376:C:T	rs11894252	2	46533376	T	C	1	E005,6_EnhG;E016,7_Enh;E017,6_EnhG;E020,7_Enh;E026,7_Enh;E027,7_Enh;E028,7_Enh;E033,7_Enh;E034,7_Enh;E035,7_Enh;E037,7_Enh;E038,7_Enh;E039,7_Enh;E040,12_EnhBiv;E041,7_Enh;E042,12_EnhBiv;E047,7_Enh;E049,7_Enh;E052,7_Enh;E058,7_Enh;E063,7_Enh;E065,7_Enh;E066,7_Enh;E077,7_Enh;E080,7_Enh;E083,7_Enh;E084,7_Enh;E085,7_Enh;E087,7_Enh;E088,7_Enh;E091,7_Enh;E095,6_EnhG;E096,7_Enh;E097,7_Enh;E098,7_Enh;E09…	E083,7_Enh;E095,6_EnhG;E104,7_Enh	E057;E083;E117	E083
20	previously not reported	EPAS1	2:46533376:C:T	rs11894252	2	46533376	T	C	2:46533552:G:T	rs11684885	2	46533552	T	G	1	E001,7_Enh;E005,6_EnhG;E008,7_Enh;E015,7_Enh;E016,7_Enh;E017,6_EnhG;E020,7_Enh;E026,6_EnhG;E027,7_Enh;E028,7_Enh;E033,7_Enh;E034,7_Enh;E035,7_Enh;E037,7_Enh;E038,7_Enh;E039,7_Enh;E040,12_EnhBiv;E041,12_EnhBiv;E042,12_EnhBiv;E047,7_Enh;E049,7_Enh;E052,7_Enh;E058,2_TssAFlnk;E063,7_Enh;E065,7_Enh;E066,2_TssAFlnk;E068,7_Enh;E071,7_Enh;E075,7_Enh;E077,2_TssAFlnk;E078,7_Enh;E080,7_Enh;E083,7_Enh;E084,7…	E083,7_Enh;E095,6_EnhG;E104,7_Enh	E005;E006;E017;E028;E057;E083;E084;E085;E091;E092;E094;E098;E109;E114;E117;E118;E119;E122;E125;E127	E083
20	previously not reported	EPAS1	2:46533376:C:T	rs11894252	2	46533376	T	C	2:46534338:A:G	rs1867785	2	46534338	A	G	0.986041	E001,7_Enh;E005,6_EnhG;E013,7_Enh;E017,6_EnhG;E020,12_EnhBiv;E021,7_Enh;E026,6_EnhG;E027,7_Enh;E028,7_Enh;E049,7_Enh;E052,7_Enh;E057,7_Enh;E058,7_Enh;E063,7_Enh;E066,2_TssAFlnk;E067,7_Enh;E068,7_Enh;E071,7_Enh;E073,7_Enh;E075,1_TssA;E077,2_TssAFlnk;E078,7_Enh;E080,7_Enh;E083,7_Enh;E084,7_Enh;E085,7_Enh;E087,7_Enh;E088,7_Enh;E089,7_Enh;E090,7_Enh;E091,7_Enh;E095,6_EnhG;E096,7_Enh;E097,7_Enh;E098,7…	E083,7_Enh;E095,6_EnhG;E104,2_TssAFlnk;E105,7_Enh	E083;E084;E085;E088;E091;E092;E098;E109;E114;E117;E118;E121	E083
20	previously not reported	EPAS1	2:46533376:C:T	rs11894252	2	46533376	T	C	2:46537604:A:G	rs7579899	2	46537604	A	G	0.976516	E005,7_Enh;E017,7_Enh;E025,7_Enh;E026,7_Enh;E027,7_Enh;E028,7_Enh;E055,7_Enh;E056,7_Enh;E057,7_Enh;E058,7_Enh;E063,7_Enh;E065,7_Enh;E066,7_Enh;E077,7_Enh;E080,7_Enh;E084,7_Enh;E085,7_Enh;E091,6_EnhG;E095,7_Enh;E096,7_Enh;E098,7_Enh;E100,7_Enh;E102,7_Enh;E104,7_Enh;E105,7_Enh;E107,7_Enh;E108,7_Enh;E109,7_Enh;E110,7_Enh;E113,7_Enh;E114,7_Enh;E117,6_EnhG;E118,6_EnhG;E119,7_Enh;E122,7_Enh;E126,7_Enh;…	E095,7_Enh;E104,7_Enh;E105,7_Enh	E091;E127
20	previously not reported	EPAS1	2:46533376:C:T	rs11894252	2	46533376	T	C	2:46541176:C:T	rs11689011	2	46541176	T	C	0.88868	E005,6_EnhG;E017,6_EnhG;E025,7_Enh;E026,7_Enh;E027,7_Enh;E028,6_EnhG;E063,7_Enh;E066,7_Enh;E080,7_Enh;E085,7_Enh;E091,6_EnhG;E095,7_Enh;E096,7_Enh;E098,7_Enh;E099,7_Enh;E104,7_Enh;E105,7_Enh;E107,7_Enh;E109,7_Enh;E110,7_Enh;E114,2_TssAFlnk;E117,6_EnhG;E118,7_Enh;E119,7_Enh;E122,7_Enh;E127,7_Enh	E095,7_Enh;E104,7_Enh;E105,7_Enh
21	previously not reported	FBXO11	2:48150587:C:T	rs7588761	2	48150587	C	T	2:48073877:D:I	rs146142156	2	48073877	I	T	0.80171	E041,7_Enh
21	previously not reported	FBXO11	2:48150587:C:T	rs7588761	2	48150587	C	T	2:48143149:C:T	rs17037055	2	48143149	T	C	0.944092	E011,7_Enh;E012,7_Enh;E024,7_Enh
22	previously not reported	SPTBN1	2:54824815:A:G	rs4519566	2	54824815	G	A	2:54788276:C:T	rs6545430	2	54788276	T	C	0.892778	E001,1_TssA;E003,2_TssAFlnk;E004,7_Enh;E005,7_Enh;E008,1_TssA;E009,1_TssA;E010,2_TssAFlnk;E011,1_TssA;E012,7_Enh;E013,1_TssA;E014,1_TssA;E015,2_TssAFlnk;E016,1_TssA;E017,7_Enh;E018,7_Enh;E019,1_TssA;E020,2_TssAFlnk;E023,2_TssAFlnk;E024,7_Enh;E025,2_TssAFlnk;E026,2_TssAFlnk;E027,7_Enh;E028,2_TssAFlnk;E029,2_TssAFlnk;E030,2_TssAFlnk;E031,2_TssAFlnk;E032,2_TssAFlnk;E033,2_TssAFlnk;E034,2_TssAFlnk;E0…	E083,7_Enh;E095,7_Enh;E104,1_TssA	E088;E093;E116
22	previously not reported	SPTBN1	2:54824815:A:G	rs4519566	2	54824815	G	A	2:54789232:C:T	rs12713262	2	54789232	T	C	0.909039	E001,7_Enh;E003,7_Enh;E004,7_Enh;E006,7_Enh;E008,7_Enh;E010,7_Enh;E011,2_TssAFlnk;E013,6_EnhG;E014,2_TssAFlnk;E015,2_TssAFlnk;E016,2_TssAFlnk;E018,2_TssAFlnk;E019,7_Enh;E020,2_TssAFlnk;E024,7_Enh;E026,7_Enh;E028,6_EnhG;E029,7_Enh;E030,7_Enh;E031,2_TssAFlnk;E032,2_TssAFlnk;E033,2_TssAFlnk;E034,1_TssA;E035,2_TssAFlnk;E036,7_Enh;E037,2_TssAFlnk;E038,2_TssAFlnk;E039,1_TssA;E040,7_Enh;E041,2_TssAFlnk;…	E083,7_Enh;E095,7_Enh;E104,7_Enh	E032;E050;E083;E084;E092;E093;E116;E118;E119;E123;E124	E083
22	previously not reported	SPTBN1	2:54824815:A:G	rs4519566	2	54824815	G	A	2:54794639:D:I	rs33937060	2	54794639	I	G	0.934042	E030,7_Enh;E031,7_Enh;E032,7_Enh;E033,7_Enh;E034,7_Enh;E037,7_Enh;E038,7_Enh;E039,7_Enh;E040,7_Enh;E041,7_Enh;E042,7_Enh;E043,7_Enh;E046,6_EnhG;E047,7_Enh;E048,7_Enh;E050,7_Enh;E051,7_Enh;E058,6_EnhG;E061,6_EnhG;E066,7_Enh;E078,7_Enh;E080,6_EnhG;E084,6_EnhG;E098,7_Enh;E110,7_Enh;E114,6_EnhG;E116,6_EnhG;E118,6_EnhG
22	previously not reported	SPTBN1	2:54824815:A:G	rs4519566	2	54824815	G	A	2:54795929:A:G	rs7602992	2	54795929	A	G	0.895867	E001,7_Enh;E011,7_Enh;E013,7_Enh;E014,7_Enh;E015,7_Enh;E016,7_Enh;E018,7_Enh;E019,7_Enh;E020,7_Enh;E024,7_Enh;E028,7_Enh;E029,7_Enh;E030,7_Enh;E031,2_TssAFlnk;E032,7_Enh;E033,2_TssAFlnk;E034,7_Enh;E035,7_Enh;E036,7_Enh;E037,2_TssAFlnk;E038,2_TssAFlnk;E039,2_TssAFlnk;E040,2_TssAFlnk;E041,2_TssAFlnk;E042,7_Enh;E043,7_Enh;E044,7_Enh;E045,7_Enh;E047,7_Enh;E048,2_TssAFlnk;E050,7_Enh;E051,7_Enh;E053,7_…	E083,7_Enh;E105,7_Enh	E034
22	previously not reported	SPTBN1	2:54824815:A:G	rs4519566	2	54824815	G	A	2:54797798:C:T	rs6734445	2	54797798	C	T	0.889873	E001,7_Enh;E003,7_Enh;E004,7_Enh;E005,7_Enh;E011,7_Enh;E012,7_Enh;E013,7_Enh;E014,7_Enh;E015,7_Enh;E016,7_Enh;E017,7_Enh;E018,2_TssAFlnk;E019,7_Enh;E020,7_Enh;E021,7_Enh;E023,2_TssAFlnk;E024,7_Enh;E025,7_Enh;E026,2_TssAFlnk;E027,7_Enh;E028,7_Enh;E029,7_Enh;E030,7_Enh;E031,2_TssAFlnk;E032,7_Enh;E033,2_TssAFlnk;E034,7_Enh;E035,7_Enh;E036,2_TssAFlnk;E037,7_Enh;E038,2_TssAFlnk;E039,2_TssAFlnk;E040,2_…	E083,7_Enh;E095,7_Enh;E104,7_Enh;E105,7_Enh	E021;E034;E056;E057;E080;E083;E093;E116;E125;E127;E128	E083
22	previously not reported	SPTBN1	2:54824815:A:G	rs10166844	2	54824815	G	A	2:54798272:C:T		2	54798272	T	C	0.817955			E004;E006;E017;E028;E029;E032;E033;E034;E046;E050;E051;E055;E056;E057;E059;E080;E083;E084;E086;E088;E089;E090;E092;E093;E098;E100;E109;E114;E116;E117;E118;E119;E120;E121;E122;E123;E124;E125;E126;E127;E128	E083
22	previously not reported	SPTBN1	2:54824815:A:G	rs4519566	2	54824815	G	A	2:54800128:G:T	rs13391803	2	54800128	T	G	0.816203	E001,7_Enh;E003,7_Enh;E004,7_Enh;E005,7_Enh;E006,7_Enh;E011,7_Enh;E012,7_Enh;E013,7_Enh;E015,7_Enh;E016,7_Enh;E017,7_Enh;E018,7_Enh;E019,7_Enh;E023,2_TssAFlnk;E024,7_Enh;E025,2_TssAFlnk;E026,2_TssAFlnk;E027,7_Enh;E028,7_Enh;E030,7_Enh;E031,7_Enh;E032,7_Enh;E033,2_TssAFlnk;E034,2_TssAFlnk;E035,7_Enh;E036,7_Enh;E037,2_TssAFlnk;E038,2_TssAFlnk;E039,2_TssAFlnk;E040,2_TssAFlnk;E041,2_TssAFlnk;E042,2_T…	E083,7_Enh;E095,7_Enh;E104,7_Enh;E105,7_Enh	E006;E017;E028;E033;E034;E046;E055;E056;E057;E080;E084;E085;E086;E088;E089;E092;E093;E109;E114;E116;E117;E118;E120;E121;E122;E123;E125;E127;E128
22	previously not reported	SPTBN1	2:54824815:A:G	rs10688458	2	54824815	G	A	2:54801065:D:I		2	54801065	D	I	0.820475			E034;E057;E059;E109;E117;E127
22	previously not reported	SPTBN1	2:54824815:A:G	rs4519566	2	54824815	G	A	2:54801074:A:T	rs13407214	2	54801074	A	T	0.820475	E001,7_Enh;E004,7_Enh;E005,7_Enh;E006,7_Enh;E011,7_Enh;E013,7_Enh;E015,7_Enh;E016,7_Enh;E017,7_Enh;E018,7_Enh;E023,7_Enh;E025,7_Enh;E026,7_Enh;E028,7_Enh;E029,7_Enh;E030,7_Enh;E031,2_TssAFlnk;E032,7_Enh;E033,2_TssAFlnk;E034,2_TssAFlnk;E035,7_Enh;E036,7_Enh;E037,2_TssAFlnk;E038,2_TssAFlnk;E039,2_TssAFlnk;E040,2_TssAFlnk;E041,2_TssAFlnk;E042,2_TssAFlnk;E043,2_TssAFlnk;E044,2_TssAFlnk;E045,2_TssAFln…	E083,7_Enh;E095,7_Enh;E104,7_Enh;E105,7_Enh	E034;E057;E059;E084;E109;E117;E127
22	previously not reported	SPTBN1	2:54824815:A:G	rs4519566	2	54824815	G	A	2:54801591:A:T	rs4455200	2	54801591	T	A	0.822451	E001,7_Enh;E004,7_Enh;E005,7_Enh;E006,7_Enh;E011,7_Enh;E013,7_Enh;E014,7_Enh;E015,7_Enh;E017,7_Enh;E018,7_Enh;E022,7_Enh;E023,7_Enh;E025,7_Enh;E026,7_Enh;E027,6_EnhG;E028,6_EnhG;E029,7_Enh;E030,2_TssAFlnk;E031,2_TssAFlnk;E032,7_Enh;E033,2_TssAFlnk;E034,2_TssAFlnk;E035,7_Enh;E036,7_Enh;E037,2_TssAFlnk;E038,2_TssAFlnk;E039,2_TssAFlnk;E040,2_TssAFlnk;E041,2_TssAFlnk;E042,2_TssAFlnk;E043,2_TssAFlnk;E…	E083,7_Enh;E095,7_Enh;E104,7_Enh;E105,7_Enh	E005;E006;E029;E032;E033;E034;E046;E050;E057;E059;E080;E083;E084;E085;E089;E091;E092;E093;E094;E098;E109;E114;E116;E117;E118;E121;E122;E123;E124;E125;E127	E083
22	previously not reported	SPTBN1	2:54824815:A:G	rs4519566	2	54824815	G	A	2:54801856:A:G	rs7599241	2	54801856	G	A	0.814111	E001,7_Enh;E003,7_Enh;E004,7_Enh;E005,7_Enh;E006,7_Enh;E008,7_Enh;E011,7_Enh;E013,7_Enh;E014,7_Enh;E015,7_Enh;E016,7_Enh;E017,7_Enh;E018,7_Enh;E020,7_Enh;E022,7_Enh;E023,7_Enh;E025,7_Enh;E026,7_Enh;E027,6_EnhG;E028,6_EnhG;E029,7_Enh;E030,2_TssAFlnk;E031,7_Enh;E032,7_Enh;E033,2_TssAFlnk;E034,7_Enh;E035,7_Enh;E036,7_Enh;E037,7_Enh;E038,2_TssAFlnk;E039,7_Enh;E040,7_Enh;E041,2_TssAFlnk;E042,7_Enh;E04…	E083,7_Enh;E095,7_Enh;E104,7_Enh;E105,7_Enh	E006;E017;E028;E029;E032;E033;E034;E046;E050;E051;E055;E057;E059;E080;E083;E084;E085;E086;E088;E091;E092;E093;E109;E114;E116;E117;E118;E119;E120;E121;E122;E123;E124;E125;E126;E127;E128	E083
22	previously not reported	SPTBN1	2:54824815:A:G	rs4519566	2	54824815	G	A	2:54802206:C:T	rs4346422	2	54802206	T	C	0.820573	E001,7_Enh;E003,7_Enh;E004,7_Enh;E005,7_Enh;E013,7_Enh;E014,7_Enh;E015,7_Enh;E016,7_Enh;E017,7_Enh;E018,7_Enh;E019,7_Enh;E020,7_Enh;E023,7_Enh;E025,7_Enh;E026,7_Enh;E027,6_EnhG;E028,6_EnhG;E029,7_Enh;E030,7_Enh;E031,7_Enh;E032,7_Enh;E033,2_TssAFlnk;E034,7_Enh;E035,7_Enh;E036,7_Enh;E037,7_Enh;E038,2_TssAFlnk;E039,7_Enh;E040,7_Enh;E041,7_Enh;E042,7_Enh;E043,7_Enh;E044,7_Enh;E045,7_Enh;E046,7_Enh;E0…	E083,7_Enh;E095,7_Enh;E104,7_Enh;E105,7_Enh	E004;E032;E033;E034;E046;E050;E051;E057;E080;E083;E093;E114;E116;E117;E127	E083
22	previously not reported	SPTBN1	2:54824815:A:G	rs4519566	2	54824815	G	A	2:54802514:C:G	rs13386146	2	54802514	G	C	0.808343	E001,7_Enh;E002,7_Enh;E004,7_Enh;E005,7_Enh;E013,6_EnhG;E014,7_Enh;E015,7_Enh;E016,7_Enh;E017,7_Enh;E018,7_Enh;E019,7_Enh;E020,7_Enh;E023,7_Enh;E025,7_Enh;E026,7_Enh;E028,7_Enh;E029,7_Enh;E030,7_Enh;E031,2_TssAFlnk;E032,6_EnhG;E033,7_Enh;E034,7_Enh;E035,7_Enh;E036,7_Enh;E037,7_Enh;E038,2_TssAFlnk;E039,2_TssAFlnk;E040,7_Enh;E041,7_Enh;E042,7_Enh;E043,7_Enh;E044,7_Enh;E045,7_Enh;E046,7_Enh;E047,7_E…	E083,7_Enh;E095,7_Enh;E104,7_Enh;E105,7_Enh	E004;E028;E034;E046;E057;E080;E109;E116;E117;E119;E127
22	previously not reported	SPTBN1	2:54824815:A:G	rs4519566	2	54824815	G	A	2:54803671:A:C	rs7340302	2	54803671	A	C	0.816175	E001,7_Enh;E003,7_Enh;E006,6_EnhG;E008,7_Enh;E014,7_Enh;E015,7_Enh;E018,7_Enh;E019,7_Enh;E021,7_Enh;E022,7_Enh;E025,7_Enh;E028,6_EnhG;E030,7_Enh;E031,6_EnhG;E032,6_EnhG;E033,7_Enh;E034,7_Enh;E035,7_Enh;E036,7_Enh;E037,7_Enh;E038,7_Enh;E039,7_Enh;E040,7_Enh;E041,7_Enh;E042,7_Enh;E043,7_Enh;E044,7_Enh;E045,7_Enh;E046,7_Enh;E047,7_Enh;E048,7_Enh;E050,7_Enh;E051,7_Enh;E053,7_Enh;E054,7_Enh;E057,7_Enh…	E083,7_Enh;E095,7_Enh;E104,7_Enh;E105,7_Enh	E083;E116	E083
22	previously not reported	SPTBN1	2:54824815:A:G	rs4519566	2	54824815	G	A	2:54805069:D:I	rs66622084	2	54805069	I	A	0.816686	E003,7_Enh;E004,7_Enh;E008,7_Enh;E009,7_Enh;E011,7_Enh;E013,6_EnhG;E014,7_Enh;E015,7_Enh;E016,7_Enh;E018,7_Enh;E019,7_Enh;E020,7_Enh;E024,7_Enh;E025,7_Enh;E027,7_Enh;E028,6_EnhG;E030,7_Enh;E031,6_EnhG;E032,6_EnhG;E033,2_TssAFlnk;E034,7_Enh;E035,7_Enh;E036,7_Enh;E037,7_Enh;E038,7_Enh;E039,7_Enh;E040,7_Enh;E041,7_Enh;E042,7_Enh;E043,7_Enh;E044,7_Enh;E045,7_Enh;E046,7_Enh;E047,7_Enh;E048,2_TssAFlnk;…	E083,7_Enh;E104,7_Enh;E105,7_Enh
22	previously not reported	SPTBN1	2:54824815:A:G	rs4519566	2	54824815	G	A	2:54805218:A:C	rs12713264	2	54805218	C	A	0.81733	E002,7_Enh;E003,7_Enh;E004,7_Enh;E008,7_Enh;E009,7_Enh;E010,7_Enh;E011,7_Enh;E013,6_EnhG;E014,7_Enh;E015,7_Enh;E016,7_Enh;E018,7_Enh;E019,7_Enh;E020,7_Enh;E024,7_Enh;E025,7_Enh;E027,7_Enh;E028,6_EnhG;E030,7_Enh;E031,6_EnhG;E032,6_EnhG;E033,2_TssAFlnk;E034,7_Enh;E035,7_Enh;E036,7_Enh;E037,7_Enh;E038,7_Enh;E039,7_Enh;E040,7_Enh;E041,7_Enh;E042,7_Enh;E043,7_Enh;E044,7_Enh;E045,7_Enh;E046,7_Enh;E047,…	E083,7_Enh;E104,7_Enh;E105,7_Enh	E059;E084;E090;E109
22	previously not reported	SPTBN1	2:54824815:A:G	rs4519566	2	54824815	G	A	2:54805409:C:T	rs12713265	2	54805409	C	T	0.819195	E003,7_Enh;E004,7_Enh;E008,7_Enh;E009,7_Enh;E010,7_Enh;E011,7_Enh;E012,7_Enh;E013,7_Enh;E014,7_Enh;E015,7_Enh;E016,7_Enh;E018,7_Enh;E019,7_Enh;E020,7_Enh;E024,7_Enh;E025,7_Enh;E026,7_Enh;E027,7_Enh;E028,6_EnhG;E030,7_Enh;E031,6_EnhG;E032,7_Enh;E033,7_Enh;E034,7_Enh;E035,7_Enh;E036,7_Enh;E037,7_Enh;E038,7_Enh;E039,7_Enh;E040,7_Enh;E041,7_Enh;E042,7_Enh;E043,7_Enh;E044,7_Enh;E045,7_Enh;E046,7_Enh;E…	E083,7_Enh;E104,7_Enh;E105,7_Enh	E059;E080;E085;E089;E090;E109;E114;E116;E118
22	previously not reported	SPTBN1	2:54824815:A:G	rs4519566	2	54824815	G	A	2:54805443:G:T	rs12713266	2	54805443	G	T	0.819839	E003,7_Enh;E004,7_Enh;E008,7_Enh;E009,7_Enh;E010,7_Enh;E011,7_Enh;E012,7_Enh;E013,7_Enh;E014,7_Enh;E015,7_Enh;E016,7_Enh;E018,7_Enh;E019,7_Enh;E020,7_Enh;E024,7_Enh;E025,7_Enh;E026,7_Enh;E027,7_Enh;E028,6_EnhG;E030,7_Enh;E031,6_EnhG;E032,7_Enh;E033,7_Enh;E034,7_Enh;E035,7_Enh;E036,7_Enh;E037,7_Enh;E038,7_Enh;E039,7_Enh;E040,7_Enh;E041,7_Enh;E042,7_Enh;E043,7_Enh;E044,7_Enh;E045,7_Enh;E046,7_Enh;E…	E083,7_Enh;E104,7_Enh;E105,7_Enh	E059;E080;E083;E088;E089;E090;E093;E109;E116;E118	E083
22	previously not reported	SPTBN1	2:54824815:A:G	rs4519566	2	54824815	G	A	2:54805587:C:T	rs11902987	2	54805587	C	T	0.829712	E003,7_Enh;E004,7_Enh;E008,7_Enh;E009,7_Enh;E010,7_Enh;E011,7_Enh;E012,7_Enh;E013,7_Enh;E014,7_Enh;E015,7_Enh;E016,7_Enh;E018,7_Enh;E019,7_Enh;E020,7_Enh;E024,7_Enh;E025,7_Enh;E026,7_Enh;E027,7_Enh;E028,6_EnhG;E030,7_Enh;E031,6_EnhG;E032,7_Enh;E033,7_Enh;E034,7_Enh;E035,7_Enh;E036,7_Enh;E037,7_Enh;E038,7_Enh;E039,7_Enh;E040,7_Enh;E041,7_Enh;E042,7_Enh;E043,7_Enh;E044,7_Enh;E045,7_Enh;E046,7_Enh;E…	E083,7_Enh;E104,7_Enh;E105,7_Enh	E017;E059;E083;E086;E088;E089;E090;E092;E093;E097;E116;E120;E121;E125;E128	E083
22	previously not reported	SPTBN1	2:54824815:A:G	rs4519566	2	54824815	G	A	2:54805607:C:T	rs12713267	2	54805607	T	C	0.818741	E003,7_Enh;E004,7_Enh;E009,7_Enh;E010,7_Enh;E011,7_Enh;E012,7_Enh;E013,7_Enh;E015,7_Enh;E016,7_Enh;E018,7_Enh;E019,7_Enh;E020,7_Enh;E023,7_Enh;E024,7_Enh;E025,7_Enh;E026,7_Enh;E027,7_Enh;E028,6_EnhG;E030,7_Enh;E031,6_EnhG;E032,7_Enh;E033,7_Enh;E034,7_Enh;E035,7_Enh;E036,7_Enh;E037,7_Enh;E038,7_Enh;E039,7_Enh;E040,7_Enh;E041,7_Enh;E042,7_Enh;E043,7_Enh;E044,7_Enh;E045,7_Enh;E046,7_Enh;E047,7_Enh;E…	E083,7_Enh;E104,7_Enh;E105,7_Enh	E006;E017;E059;E080;E083;E086;E088;E089;E090;E092;E097;E116;E121;E125;E128	E083
22	previously not reported	SPTBN1	2:54824815:A:G	rs4519566	2	54824815	G	A	2:54805749:A:G	rs13403284	2	54805749	A	G	0.819579	E003,7_Enh;E004,7_Enh;E009,7_Enh;E010,7_Enh;E011,7_Enh;E012,7_Enh;E013,7_Enh;E015,7_Enh;E016,7_Enh;E018,7_Enh;E019,7_Enh;E020,7_Enh;E023,7_Enh;E024,7_Enh;E025,7_Enh;E026,7_Enh;E027,7_Enh;E028,6_EnhG;E030,7_Enh;E031,6_EnhG;E032,7_Enh;E033,7_Enh;E034,7_Enh;E035,7_Enh;E036,7_Enh;E037,7_Enh;E038,7_Enh;E039,7_Enh;E040,7_Enh;E041,7_Enh;E042,7_Enh;E043,7_Enh;E044,7_Enh;E045,7_Enh;E046,7_Enh;E047,7_Enh;E…	E083,7_Enh;E104,7_Enh;E105,7_Enh	E059;E088;E089;E090;E120;E121;E126
22	previously not reported	SPTBN1	2:54824815:A:G	rs4519566	2	54824815	G	A	2:54805776:A:G	rs11892443	2	54805776	A	G	0.819127	E003,7_Enh;E004,7_Enh;E009,7_Enh;E010,7_Enh;E011,7_Enh;E012,7_Enh;E013,7_Enh;E015,7_Enh;E016,7_Enh;E018,7_Enh;E019,7_Enh;E020,7_Enh;E023,7_Enh;E024,7_Enh;E025,7_Enh;E026,7_Enh;E027,7_Enh;E028,6_EnhG;E030,7_Enh;E031,6_EnhG;E032,7_Enh;E033,7_Enh;E034,7_Enh;E035,7_Enh;E036,7_Enh;E037,7_Enh;E038,7_Enh;E039,7_Enh;E040,7_Enh;E041,7_Enh;E042,7_Enh;E043,7_Enh;E044,7_Enh;E045,7_Enh;E046,7_Enh;E047,7_Enh;E…	E083,7_Enh;E104,7_Enh;E105,7_Enh	E059;E089;E090;E120;E121;E126
22	previously not reported	SPTBN1	2:54824815:A:G	rs4519566	2	54824815	G	A	2:54805854:C:T	rs13391522	2	54805854	T	C	0.820034	E003,7_Enh;E004,7_Enh;E009,7_Enh;E010,7_Enh;E011,7_Enh;E013,7_Enh;E015,7_Enh;E016,7_Enh;E018,7_Enh;E019,7_Enh;E020,7_Enh;E023,7_Enh;E024,7_Enh;E025,7_Enh;E026,7_Enh;E027,7_Enh;E028,6_EnhG;E030,7_Enh;E031,6_EnhG;E032,7_Enh;E033,7_Enh;E034,7_Enh;E035,7_Enh;E036,7_Enh;E037,7_Enh;E038,7_Enh;E039,7_Enh;E040,7_Enh;E041,7_Enh;E042,7_Enh;E043,7_Enh;E044,7_Enh;E045,7_Enh;E046,7_Enh;E047,7_Enh;E048,7_Enh;E…	E083,7_Enh;E095,7_Enh;E104,7_Enh;E105,7_Enh	E059;E088;E089;E090;E120;E121;E126
22	previously not reported	SPTBN1	2:54824815:A:G	rs10208219	2	54824815	G	A	2:54806047:A:G		2	54806047	G	A	0.811566			E059
22	previously not reported	SPTBN1	2:54824815:A:G	rs10208225	2	54824815	G	A	2:54806049:A:G		2	54806049	G	A	0.811566			E059
22	previously not reported	SPTBN1	2:54824815:A:G	rs4519566	2	54824815	G	A	2:54806712:A:G	rs59667887	2	54806712	G	A	0.972347	E003,7_Enh;E004,7_Enh;E006,6_EnhG;E009,7_Enh;E011,7_Enh;E012,7_Enh;E013,7_Enh;E014,7_Enh;E015,7_Enh;E017,7_Enh;E018,7_Enh;E019,7_Enh;E022,7_Enh;E024,7_Enh;E025,7_Enh;E026,7_Enh;E027,7_Enh;E028,6_EnhG;E029,7_Enh;E030,7_Enh;E031,6_EnhG;E032,7_Enh;E033,2_TssAFlnk;E034,2_TssAFlnk;E035,2_TssAFlnk;E036,2_TssAFlnk;E037,2_TssAFlnk;E038,2_TssAFlnk;E039,2_TssAFlnk;E040,2_TssAFlnk;E041,2_TssAFlnk;E042,2_Tss…	E083,7_Enh;E095,7_Enh;E104,7_Enh;E105,7_Enh	E017;E084;E085;E092;E093;E109;E116;E118
22	previously not reported	SPTBN1	2:54824815:A:G	rs10170066	2	54824815	G	A	2:54808191:C:T		2	54808191	C	T	0.85531			E116
22	previously not reported	SPTBN1	2:54824815:A:G	rs10210502	2	54824815	G	A	2:54813546:A:G		2	54813546	A	G	0.975704			E081;E117;E122;E123;E125;E128
22	previously not reported	SPTBN1	2:54824815:A:G	rs4519566	2	54824815	G	A	2:54818895:C:T	rs7584223	2	54818895	T	C	0.873148	E013,7_Enh;E030,7_Enh;E031,7_Enh;E032,7_Enh;E033,7_Enh;E034,7_Enh;E035,7_Enh;E036,6_EnhG;E037,7_Enh;E038,7_Enh;E039,2_TssAFlnk;E040,7_Enh;E041,7_Enh;E042,7_Enh;E043,7_Enh;E044,7_Enh;E045,7_Enh;E047,7_Enh;E048,7_Enh;E050,7_Enh;E051,2_TssAFlnk;E059,7_Enh;E061,7_Enh;E066,7_Enh;E068,7_Enh;E080,7_Enh;E081,7_Enh;E083,7_Enh;E084,7_Enh;E085,7_Enh;E093,7_Enh;E098,7_Enh;E106,7_Enh;E110,7_Enh;E112,7_Enh;E11…	E083,7_Enh	E059;E081;E082
22	previously not reported	SPTBN1	2:54824815:A:G	rs4519566	2	54824815	G	A	2:54823130:D:I	rs11277978	2	54823130	I	C	0.994941	E003,7_Enh;E006,6_EnhG;E007,7_Enh;E018,7_Enh;E022,7_Enh;E025,7_Enh;E028,6_EnhG;E030,7_Enh;E031,7_Enh;E032,6_EnhG;E033,2_TssAFlnk;E034,7_Enh;E035,7_Enh;E036,6_EnhG;E037,7_Enh;E038,7_Enh;E039,2_TssAFlnk;E040,7_Enh;E041,2_TssAFlnk;E042,7_Enh;E043,7_Enh;E044,7_Enh;E045,7_Enh;E046,7_Enh;E047,7_Enh;E048,2_TssAFlnk;E050,7_Enh;E051,7_Enh;E052,7_Enh;E054,6_EnhG;E057,6_EnhG;E058,6_EnhG;E059,7_Enh;E061,7_En…	E083,7_Enh;E095,7_Enh;E104,7_Enh;E105,7_Enh	E021;E033
22	previously not reported	SPTBN1	2:54824815:A:G	rs4519566	2	54824815	G	A	2:54824396:A:G	rs4577321	2	54824396	A	G	0.997464	E006,6_EnhG;E025,7_Enh;E026,6_EnhG;E027,7_Enh;E029,7_Enh;E030,7_Enh;E031,7_Enh;E032,7_Enh;E033,2_TssAFlnk;E034,7_Enh;E035,7_Enh;E036,7_Enh;E037,7_Enh;E038,7_Enh;E039,2_TssAFlnk;E040,7_Enh;E041,2_TssAFlnk;E042,7_Enh;E043,2_TssAFlnk;E044,2_TssAFlnk;E045,7_Enh;E046,7_Enh;E047,7_Enh;E048,7_Enh;E050,7_Enh;E051,7_Enh;E052,7_Enh;E055,6_EnhG;E056,6_EnhG;E057,6_EnhG;E058,6_EnhG;E059,7_Enh;E062,7_Enh;E063,…	E083,7_Enh;E095,7_Enh;E104,7_Enh;E105,7_Enh	E033;E046;E050;E080;E083;E093;E098;E120;E121;E125;E128	E083
22	previously not reported	SPTBN1	2:54824815:A:G	rs4519566	2	54824815	G	A	2:54824815:A:G	rs4519566	2	54824815	G	A	1	E005,7_Enh;E006,6_EnhG;E017,7_Enh;E025,7_Enh;E026,7_Enh;E027,7_Enh;E028,7_Enh;E029,7_Enh;E030,7_Enh;E031,6_EnhG;E032,7_Enh;E033,2_TssAFlnk;E034,7_Enh;E035,6_EnhG;E036,7_Enh;E037,7_Enh;E038,7_Enh;E039,2_TssAFlnk;E040,7_Enh;E041,2_TssAFlnk;E042,2_TssAFlnk;E043,7_Enh;E044,7_Enh;E045,7_Enh;E046,7_Enh;E047,7_Enh;E048,7_Enh;E050,7_Enh;E051,2_TssAFlnk;E052,7_Enh;E057,6_EnhG;E061,6_EnhG;E062,7_Enh;E063,7…	E083,7_Enh;E095,7_Enh;E104,7_Enh;E105,7_Enh	E033;E034;E046;E050;E051;E080;E083;E086;E089;E090;E092;E093;E094;E097;E098;E114;E116;E120;E121;E125;E128	E083
22	previously not reported	SPTBN1	2:54824815:A:G	rs4519566	2	54824815	G	A	2:54845117:G:T	rs12713273	2	54845117	T	G	0.805539	E023,6_EnhG;E033,6_EnhG;E041,6_EnhG;E043,6_EnhG;E059,6_EnhG;E061,6_EnhG;E063,6_EnhG;E066,6_EnhG;E067,6_EnhG;E068,6_EnhG;E069,6_EnhG;E076,7_Enh;E078,6_EnhG;E080,6_EnhG;E083,7_Enh;E088,6_EnhG;E094,6_EnhG;E095,6_EnhG;E096,6_EnhG;E097,6_EnhG;E098,6_EnhG;E100,7_Enh;E103,6_EnhG;E104,7_Enh;E105,6_EnhG;E107,6_EnhG;E111,6_EnhG;E118,6_EnhG	E083,7_Enh;E095,6_EnhG;E104,7_Enh;E105,6_EnhG
23	previously not reported	LINC01812 - C1D	2:68079211:A:G	rs7584373	2	68079211	G	A	2:68077707:A:G	rs2861754	2	68077707	G	A	0.988713	E076,7_Enh;E083,7_Enh	E083,7_Enh
23	previously not reported	LINC01812 - C1D	2:68079211:A:G	rs7584373	2	68079211	G	A	2:68077744:C:T	rs2861755	2	68077744	C	T	0.989511	E076,7_Enh;E083,7_Enh	E083,7_Enh
23	previously not reported	LINC01812 - C1D	2:68079211:A:G	rs7584373	2	68079211	G	A	2:68079211:A:G	rs7584373	2	68079211	G	A	1	E083,7_Enh	E083,7_Enh	E081;E082
23	previously not reported	LINC01812 - C1D	2:68079211:A:G	rs7584373	2	68079211	G	A	2:68081340:C:T	rs745976	2	68081340	T	C	0.832878	E055,7_Enh;E059,7_Enh;E126,7_Enh		E056;E059;E081;E082;E119
24	previously not reported	FHL2 - LOC285000	2:106104856:C:T	rs13006682	2	106104856	T	C	2:106104856:C:T	rs13006682	2	106104856	T	C	1	E006,7_Enh;E017,12_EnhBiv;E023,7_Enh;E026,7_Enh;E080,7_Enh;E083,7_Enh;E089,7_Enh;E090,7_Enh;E097,7_Enh;E100,7_Enh;E107,7_Enh;E108,2_TssAFlnk;E121,7_Enh;E123,7_Enh;E129,7_Enh	E083,7_Enh	E083	E083
25	previously not reported	NCKAP5	2:134326085:A:C	rs17816356	2	134326085	C	A	2:134326085:A:C	rs17816356	2	134326085	C	A	1	E001,7_Enh;E003,7_Enh;E008,7_Enh;E009,1_TssA;E010,2_TssAFlnk;E011,12_EnhBiv;E012,7_Enh;E013,7_Enh;E014,7_Enh;E015,7_Enh;E016,2_TssAFlnk;E017,2_TssAFlnk;E018,7_Enh;E019,11_BivFlnk;E020,7_Enh;E021,7_Enh;E023,1_TssA;E024,7_Enh;E025,2_TssAFlnk;E026,2_TssAFlnk;E028,7_Enh;E049,2_TssAFlnk;E052,11_BivFlnk;E053,2_TssAFlnk;E054,1_TssA;E055,2_TssAFlnk;E056,1_TssA;E057,2_TssAFlnk;E058,2_TssAFlnk;E061,7_Enh;E…	E083,7_Enh;E095,1_TssA;E104,1_TssA;E105,1_TssA	E006;E007;E017;E028;E055;E056;E057;E080;E081;E082;E083;E084;E085;E086;E088;E089;E090;E091;E092;E094;E097;E098;E100;E109;E114;E119;E120;E121;E122;E125;E126;E127;E128	E083
27	previously not reported	LINC01473 - ZC3H15	2:187033804:A:G	rs76466105	2	187033804	A	G	2:186819257:A:T		2	186819257	T	A	0.831667			E117
28	previously not reported	SDPR	2:192723128:A:T	rs58577564	2	192723128	T	A	2:192723128:A:T	rs58577564	2	192723128	T	A	1	E120,7_Enh;E122,7_Enh
28	previously not reported	SDPR	2:192723128:A:T	rs78598566	2	192723128	T	A	2:192723897:C:T		2	192723897	C	T	0.865251			E082
28	previously not reported	SDPR	2:192723128:A:T	rs80264811	2	192723128	T	A	2:192723915:C:T		2	192723915	C	T	0.921784			E082
28	previously not reported	SDPR	2:192723128:A:T	rs58577564	2	192723128	T	A	2:192724126:C:T	rs67758482	2	192724126	T	C	0.924689	E122,7_Enh
28	previously not reported	SDPR	2:192723128:A:T	rs58577564	2	192723128	T	A	2:192724233:C:T	rs56303926	2	192724233	C	T	0.924689	E122,7_Enh
28	previously not reported	SDPR	2:192723128:A:T	rs58577564	2	192723128	T	A	2:192725110:A:G	rs66807971	2	192725110	G	A	0.920185	E118,7_Enh
28	previously not reported	SDPR	2:192723128:A:T	rs58577564	2	192723128	T	A	2:192725337:A:C	rs67370091	2	192725337	A	C	0.921625	E118,7_Enh
28	previously not reported	SDPR	2:192723128:A:T	rs58577564	2	192723128	T	A	2:192725448:C:T	rs72912381	2	192725448	C	T	0.904336	E118,7_Enh
28	previously not reported	SDPR	2:192723128:A:T	rs58577564	2	192723128	T	A	2:192725908:C:T	rs72912383	2	192725908	C	T	0.902862	E010,7_Enh;E019,7_Enh;E020,7_Enh;E027,7_Enh;E068,7_Enh;E071,7_Enh;E072,7_Enh;E074,7_Enh;E118,2_TssAFlnk		E118;E123
29	previously not reported	BMPR2*	2:203373030:A:G	rs2103208	2	203373030	A	G	2:203210029:A:G	rs6435145	2	203210029	G	A	0.919786	E027,7_Enh
29	previously not reported	BMPR2*	2:203373030:A:G	rs2103208	2	203373030	A	G	2:203212229:A:C	rs6435146	2	203212229	A	C	0.923652	E027,7_Enh
29	previously not reported	BMPR2*	2:203373030:A:G	rs2103208	2	203373030	A	G	2:203214451:C:T	rs59036261	2	203214451	T	C	0.919757	E123,7_Enh
29	previously not reported	BMPR2*	2:203373030:A:G	rs2103208	2	203373030	A	G	2:203221574:A:G	rs6435147	2	203221574	A	G	0.931485	E061,7_Enh
29	previously not reported	BMPR2*	2:203373030:A:G	rs2103208	2	203373030	A	G	2:203251506:C:T	rs6435148	2	203251506	T	C	0.988342	E023,7_Enh;E025,7_Enh;E049,7_Enh;E052,7_Enh;E061,7_Enh;E063,7_Enh;E076,7_Enh;E080,7_Enh;E081,7_Enh;E103,7_Enh;E126,7_Enh;E129,7_Enh
29	previously not reported	BMPR2*	2:203373030:A:G	rs2103208	2	203373030	A	G	2:203264977:A:G	rs7573030	2	203264977	A	G	0.992229	E003,7_Enh;E024,7_Enh;E070,7_Enh;E113,7_Enh
29	previously not reported	BMPR2*	2:203373030:A:G	rs2103208	2	203373030	A	G	2:203273559:A:G	rs7583801	2	203273559	A	G	0.988342	E013,7_Enh;E027,7_Enh;E028,7_Enh;E052,7_Enh;E057,7_Enh;E058,2_TssAFlnk;E063,7_Enh;E078,7_Enh;E086,7_Enh;E087,7_Enh;E110,7_Enh;E119,7_Enh;E122,7_Enh;E125,7_Enh;E127,7_Enh		E028;E092;E122;E128
29	previously not reported	BMPR2*	2:203373030:A:G	rs2103208	2	203373030	A	G	2:203273885:C:T	rs1969282	2	203273885	C	T	0.988342	E006,7_Enh;E013,6_EnhG;E028,7_Enh;E052,7_Enh;E057,7_Enh;E058,7_Enh;E080,7_Enh;E096,7_Enh;E116,7_Enh;E119,7_Enh;E122,7_Enh;E127,7_Enh		E057
29	previously not reported	BMPR2*	2:203373030:A:G	rs2103208	2	203373030	A	G	2:203274963:C:T	rs2350806	2	203274963	T	C	0.992229	E013,6_EnhG;E028,7_Enh;E052,7_Enh;E057,7_Enh;E058,7_Enh;E122,7_Enh		E003;E028
29	previously not reported	BMPR2*	2:203373030:A:G	rs2103208	2	203373030	A	G	2:203284701:A:G	rs6732066	2	203284701	G	A	0.988345	E001,7_Enh;E003,7_Enh;E011,7_Enh;E014,7_Enh;E016,7_Enh;E019,7_Enh
29	previously not reported	BMPR2*	2:203373030:A:G	rs2103208	2	203373030	A	G	2:203285157:G:T	rs6747299	2	203285157	T	G	0.988345	E001,7_Enh;E003,7_Enh;E011,7_Enh;E014,7_Enh;E015,7_Enh;E016,7_Enh;E019,7_Enh
29	previously not reported	BMPR2*	2:203373030:A:G	rs2103208	2	203373030	A	G	2:203297068:G:T	rs13010656	2	203297068	T	G	0.996131	E076,7_Enh;E083,7_Enh;E097,7_Enh;E103,7_Enh;E108,7_Enh	E083,7_Enh
29	previously not reported	BMPR2*	2:203373030:A:G	rs2103208	2	203373030	A	G	2:203307477:C:T	rs6736794	2	203307477	T	C	0.996131	E011,3_TxFlnk;E070,7_Enh;E080,7_Enh;E083,7_Enh;E123,2_TssAFlnk	E083,7_Enh	E123
29	previously not reported	BMPR2*	2:203373030:A:G	rs2103208	2	203373030	A	G	2:203352937:A:G	rs6751210	2	203352937	A	G	0.988385	E077,7_Enh
29	previously not reported	BMPR2*	2:203373030:A:G	rs2103208	2	203373030	A	G	2:203373030:A:G	rs2103208	2	203373030	A	G	1	E026,7_Enh;E129,7_Enh
29	previously not reported	BMPR2*	2:203373030:A:G	rs2103208	2	203373030	A	G	2:203375701:C:T	rs12693970	2	203375701	T	C	1	E017,7_Enh;E025,7_Enh;E028,7_Enh;E058,7_Enh;E119,7_Enh		E028;E056;E057;E100;E119;E120;E127
29	previously not reported	BMPR2*	2:203373030:A:G	rs2103208	2	203373030	A	G	2:203377077:A:G	rs6748396	2	203377077	A	G	1	E066,7_Enh;E067,7_Enh;E071,7_Enh;E074,7_Enh;E118,7_Enh
30	previously not reported	AC007563.5*	2:217628087:C:T	rs6435953	2	217628087	C	T	2:217618897:C:G	rs1548943	2	217618897	C	G	0.955318	E076,7_Enh;E079,7_Enh;E090,7_Enh;E092,7_Enh;E095,7_Enh;E096,7_Enh;E103,7_Enh;E107,7_Enh;E111,7_Enh	E095,7_Enh
30	previously not reported	AC007563.5*	2:217628087:C:T	rs6435953	2	217628087	C	T	2:217619036:C:T	rs1548942	2	217619036	C	T	0.955318	E076,7_Enh;E079,7_Enh;E090,7_Enh;E092,7_Enh;E095,7_Enh;E096,7_Enh;E103,7_Enh;E107,7_Enh;E111,7_Enh	E095,7_Enh
30	previously not reported	AC007563.5*	2:217628087:C:T	rs6435953	2	217628087	C	T	2:217619060:A:C	rs1548941	2	217619060	C	A	0.962773	E076,7_Enh;E079,7_Enh;E090,7_Enh;E092,7_Enh;E095,7_Enh;E096,7_Enh;E103,7_Enh;E107,7_Enh;E111,7_Enh	E095,7_Enh
30	previously not reported	AC007563.5*	2:217628087:C:T	rs6435953	2	217628087	C	T	2:217619192:D:I	rs11280610	2	217619192	D	I	0.955318	E076,7_Enh;E079,7_Enh;E090,7_Enh;E092,7_Enh;E095,7_Enh;E096,7_Enh;E103,7_Enh;E107,7_Enh;E111,7_Enh	E095,7_Enh	E081
30	previously not reported	AC007563.5*	2:217628087:C:T	rs6435953	2	217628087	C	T	2:217619195:A:T	rs62178336	2	217619195	A	T	0.962773	E076,7_Enh;E079,7_Enh;E090,7_Enh;E092,7_Enh;E095,7_Enh;E096,7_Enh;E103,7_Enh;E107,7_Enh;E111,7_Enh	E095,7_Enh	E081
30	previously not reported	AC007563.5*	2:217628087:C:T	rs6435953	2	217628087	C	T	2:217619253:C:T	rs2541413	2	217619253	C	T	0.962773	E012,7_Enh;E053,7_Enh;E076,7_Enh;E079,7_Enh;E089,12_EnhBiv;E090,7_Enh;E092,7_Enh;E095,7_Enh;E096,7_Enh;E103,7_Enh;E107,7_Enh;E111,7_Enh	E095,7_Enh	E081
30	previously not reported	AC007563.5*	2:217628087:C:T	rs6435953	2	217628087	C	T	2:217619858:D:I	rs2712170	2	217619858	D	I	0.970315	E017,12_EnhBiv;E022,7_Enh;E046,7_Enh;E076,7_Enh;E079,7_Enh;E090,7_Enh;E096,7_Enh;E103,7_Enh;E111,7_Enh		E006;E080
30	previously not reported	AC007563.5*	2:217628087:C:T	rs6435953	2	217628087	C	T	2:217624194:C:T	rs2888429	2	217624194	T	C	0.977666	E076,7_Enh;E103,7_Enh;E111,7_Enh
30	previously not reported	AC007563.5*	2:217628087:C:T	rs6435953	2	217628087	C	T	2:217624249:C:G	rs2098418	2	217624249	C	G	0.985117	E076,7_Enh;E103,7_Enh;E111,7_Enh
30	previously not reported	AC007563.5*	2:217628087:C:T	rs6435953	2	217628087	C	T	2:217628087:C:T	rs6435953	2	217628087	C	T	1	E014,7_Enh;E016,7_Enh;E020,7_Enh
30	previously not reported	AC007563.5*	2:217628087:C:T	rs6435953	2	217628087	C	T	2:217630886:D:I	rs144306764	2	217630886	I	A	0.919634	E001,1_TssA;E005,7_Enh;E006,7_Enh;E009,7_Enh;E010,7_Enh;E011,7_Enh;E012,7_Enh;E013,7_Enh;E014,7_Enh;E015,1_TssA;E016,1_TssA;E017,12_EnhBiv;E018,7_Enh;E019,2_TssAFlnk;E020,1_TssA;E022,7_Enh;E024,7_Enh;E034,12_EnhBiv;E035,7_Enh;E036,7_Enh;E050,2_TssAFlnk;E051,2_TssAFlnk;E053,7_Enh;E054,7_Enh;E058,7_Enh;E061,7_Enh;E078,7_Enh;E079,7_Enh;E080,7_Enh;E081,7_Enh;E083,7_Enh;E084,7_Enh;E085,7_Enh;E087,7_En…	E083,7_Enh;E095,7_Enh;E104,7_Enh	E003;E005;E006;E007;E008;E021;E022;E050;E051;E080;E081;E082;E086;E088;E092;E093;E097;E121
30	previously not reported	AC007563.5*	2:217628087:C:T	rs6435953	2	217628087	C	T	2:217631338:C:T	rs17773965	2	217631338	C	T	0.919634	E001,2_TssAFlnk;E002,1_TssA;E003,7_Enh;E005,7_Enh;E008,7_Enh;E009,7_Enh;E010,7_Enh;E011,7_Enh;E012,7_Enh;E013,7_Enh;E014,2_TssAFlnk;E015,7_Enh;E016,7_Enh;E018,7_Enh;E019,7_Enh;E020,2_TssAFlnk;E035,7_Enh;E050,7_Enh;E051,7_Enh;E087,7_Enh;E090,7_Enh;E092,7_Enh;E093,7_Enh;E095,7_Enh;E097,7_Enh;E110,7_Enh;E111,7_Enh;E113,7_Enh;E123,7_Enh;E125,7_Enh	E095,7_Enh	E092
30	previously not reported	AC007563.5*	2:217628087:C:T	rs6435953	2	217628087	C	T	2:217631840:C:T	rs2193234	2	217631840	C	T	0.891514	E001,7_Enh;E002,7_Enh;E005,7_Enh;E007,7_Enh;E008,7_Enh;E009,7_Enh;E010,7_Enh;E011,7_Enh;E012,7_Enh;E013,7_Enh;E014,7_Enh;E015,7_Enh;E016,7_Enh;E018,7_Enh;E019,7_Enh;E020,7_Enh;E021,7_Enh;E024,7_Enh;E079,7_Enh;E086,7_Enh;E087,7_Enh;E090,7_Enh;E093,7_Enh;E095,7_Enh;E097,7_Enh;E111,7_Enh;E113,7_Enh;E123,7_Enh	E095,7_Enh	E093
30	previously not reported	AC007563.5*	2:217628087:C:T	rs6435953	2	217628087	C	T	2:217632085:A:G	rs7602943	2	217632085	A	G	0.869803	E001,7_Enh;E005,7_Enh;E007,7_Enh;E009,7_Enh;E011,7_Enh;E014,7_Enh;E015,7_Enh;E016,7_Enh;E087,7_Enh;E093,7_Enh;E097,7_Enh;E123,7_Enh
31	previously not reported	TMEM198	2:220414019:C:T	rs13023533	2	220414019	T	C	2:220414019:C:T	rs13023533	2	220414019	T	C	1	E059,6_EnhG
31	previously not reported	TMEM198	2:220414019:C:T	rs13023533	2	220414019	T	C	2:220415595:D:I	rs146790993	2	220415595	I	G	0.964775	E022,6_EnhG;E024,7_Enh;E055,12_EnhBiv;E085,12_EnhBiv;E090,12_EnhBiv;E097,6_EnhG
31	previously not reported	TMEM198	2:220414019:C:T	rs13023533	2	220414019	T	C	2:220416942:C:G	rs34490902	2	220416942	G	C	0.953349	E001,10_TssBiv;E002,1_TssA;E003,1_TssA;E004,1_TssA;E005,2_TssAFlnk;E006,2_TssAFlnk;E007,1_TssA;E008,1_TssA;E009,2_TssAFlnk;E010,2_TssAFlnk;E011,10_TssBiv;E012,11_BivFlnk;E013,1_TssA;E014,1_TssA;E015,1_TssA;E016,10_TssBiv;E017,2_TssAFlnk;E018,1_TssA;E019,1_TssA;E020,1_TssA;E021,1_TssA;E022,3_TxFlnk;E023,2_TssAFlnk;E024,1_TssA;E025,2_TssAFlnk;E026,1_TssA;E027,2_TssAFlnk;E028,1_TssA;E029,11_BivFlnk;…	E083,7_Enh;E095,7_Enh;E104,2_TssAFlnk;E105,2_TssAFlnk	E003;E004;E006;E007;E008;E021;E028;E034;E050;E055;E057;E059;E080;E083;E084;E085;E086;E088;E089;E090;E091;E092;E093;E097;E118;E119;E121;E123	E083
31	previously not reported	TMEM198	2:220414019:C:T	rs13023533	2	220414019	T	C	2:220417266:C:T	rs59332477	2	220417266	C	T	0.927016	E001,10_TssBiv;E002,1_TssA;E003,1_TssA;E004,1_TssA;E005,1_TssA;E006,1_TssA;E007,1_TssA;E008,1_TssA;E009,1_TssA;E010,1_TssA;E011,10_TssBiv;E012,10_TssBiv;E013,1_TssA;E014,1_TssA;E015,1_TssA;E016,10_TssBiv;E017,1_TssA;E018,1_TssA;E019,1_TssA;E020,1_TssA;E021,1_TssA;E022,3_TxFlnk;E023,1_TssA;E024,1_TssA;E025,1_TssA;E026,1_TssA;E027,1_TssA;E028,1_TssA;E029,11_BivFlnk;E030,11_BivFlnk;E031,2_TssAFlnk;E…	E095,1_TssA;E104,1_TssA;E105,2_TssAFlnk	E003;E004;E006;E007;E008;E017;E028;E029;E032;E033;E034;E046;E050;E051;E055;E056;E057;E059;E080;E081;E082;E083;E084;E085;E086;E088;E089;E090;E091;E092;E093;E094;E097;E098;E100;E109;E114;E116;E118;E119;E121;E122;E123;E124;E126;E127	E083
32	previously not reported	LSM3	3:14275759:C:G	rs6442433	3	14275759	C	G	3:14273414:C:G	rs55834511	3	14273414	G	C	0.827418	E004,12_EnhBiv;E005,7_Enh;E013,7_Enh;E017,7_Enh;E025,7_Enh;E026,7_Enh;E030,7_Enh;E035,7_Enh;E036,7_Enh;E050,7_Enh;E051,7_Enh;E055,7_Enh;E056,7_Enh;E077,7_Enh;E083,7_Enh;E084,7_Enh;E085,7_Enh;E088,7_Enh;E091,7_Enh;E099,7_Enh;E105,7_Enh;E117,7_Enh;E123,2_TssAFlnk;E125,7_Enh;E126,7_Enh;E129,7_Enh	E083,7_Enh;E105,7_Enh	E050;E051;E123
32	previously not reported	LSM3	3:14275759:C:G	rs6442433	3	14275759	C	G	3:14273464:C:T	rs55647831	3	14273464	C	T	0.990716	E004,12_EnhBiv;E005,7_Enh;E013,7_Enh;E017,7_Enh;E025,7_Enh;E026,7_Enh;E030,7_Enh;E035,7_Enh;E036,7_Enh;E050,7_Enh;E051,7_Enh;E055,7_Enh;E056,7_Enh;E077,7_Enh;E083,7_Enh;E084,7_Enh;E085,7_Enh;E088,7_Enh;E091,7_Enh;E099,7_Enh;E105,7_Enh;E117,7_Enh;E123,2_TssAFlnk;E125,7_Enh;E126,7_Enh;E129,7_Enh	E083,7_Enh;E105,7_Enh	E123
32	previously not reported	LSM3	3:14275759:C:G	rs6442433	3	14275759	C	G	3:14273472:C:T	rs56242556	3	14273472	C	T	0.990716	E004,12_EnhBiv;E005,7_Enh;E013,7_Enh;E017,7_Enh;E025,7_Enh;E026,7_Enh;E030,7_Enh;E035,7_Enh;E036,7_Enh;E050,7_Enh;E051,7_Enh;E055,7_Enh;E056,7_Enh;E077,7_Enh;E083,7_Enh;E084,7_Enh;E085,7_Enh;E088,7_Enh;E091,7_Enh;E099,7_Enh;E105,7_Enh;E117,7_Enh;E123,2_TssAFlnk;E125,7_Enh;E126,7_Enh;E129,7_Enh	E083,7_Enh;E105,7_Enh	E123
32	previously not reported	LSM3	3:14275759:C:G	rs6442433	3	14275759	C	G	3:14274293:C:T	rs56281979	3	14274293	C	T	0.894373	E005,7_Enh;E006,7_Enh;E013,7_Enh;E017,7_Enh;E026,7_Enh;E029,7_Enh;E030,7_Enh;E036,7_Enh;E046,7_Enh;E047,12_EnhBiv;E050,7_Enh;E051,7_Enh;E055,7_Enh;E056,7_Enh;E062,12_EnhBiv;E075,7_Enh;E077,7_Enh;E080,7_Enh;E083,7_Enh;E084,7_Enh;E085,7_Enh;E088,7_Enh;E090,7_Enh;E091,7_Enh;E095,7_Enh;E096,7_Enh;E099,7_Enh;E102,7_Enh;E109,7_Enh;E112,7_Enh;E117,7_Enh;E122,7_Enh;E123,7_Enh;E125,7_Enh;E126,7_Enh;E128,7…	E083,7_Enh;E095,7_Enh	E003;E004;E005;E006;E008;E017;E021;E022;E029;E046;E050;E051;E055;E056;E059;E080;E083;E084;E085;E088;E091;E092;E100;E117;E120;E121;E122;E123;E124	E083
32	previously not reported	LSM3	3:14275759:C:G	rs6442433	3	14275759	C	G	3:14275759:C:G	rs6442433	3	14275759	C	G	1	E017,7_Enh;E050,7_Enh;E051,7_Enh;E058,7_Enh;E077,7_Enh;E083,7_Enh;E084,7_Enh;E085,7_Enh;E088,7_Enh;E099,7_Enh;E101,7_Enh;E102,7_Enh;E110,7_Enh;E117,2_TssAFlnk;E127,7_Enh;E129,7_Enh	E083,7_Enh	E055;E056;E057;E083;E084;E085;E088;E109;E117;E119;E120;E123;E126	E083
32	previously not reported	LSM3	3:14275759:C:G	rs6442433	3	14275759	C	G	3:14276494:A:G	rs62231949	3	14276494	G	A	0.989168	E005,7_Enh;E017,7_Enh;E026,7_Enh;E028,7_Enh;E035,7_Enh;E050,7_Enh;E051,7_Enh;E055,12_EnhBiv;E057,7_Enh;E058,7_Enh;E077,2_TssAFlnk;E079,7_Enh;E083,7_Enh;E084,7_Enh;E085,7_Enh;E088,7_Enh;E090,7_Enh;E091,7_Enh;E095,7_Enh;E099,7_Enh;E101,7_Enh;E102,7_Enh;E105,7_Enh;E106,7_Enh;E110,7_Enh;E117,2_TssAFlnk;E118,7_Enh;E119,7_Enh;E127,2_TssAFlnk;E129,7_Enh	E083,7_Enh;E095,7_Enh;E105,7_Enh	E083;E084;E117;E123	E083
32	previously not reported	LSM3	3:14275759:C:G	rs6442433	3	14275759	C	G	3:14276982:A:G	rs17226476	3	14276982	G	A	0.990716	E005,7_Enh;E017,7_Enh;E022,7_Enh;E035,7_Enh;E050,7_Enh;E051,7_Enh;E055,12_EnhBiv;E057,7_Enh;E058,7_Enh;E075,7_Enh;E077,7_Enh;E079,7_Enh;E083,7_Enh;E084,7_Enh;E085,7_Enh;E088,7_Enh;E089,7_Enh;E090,7_Enh;E091,7_Enh;E094,7_Enh;E095,7_Enh;E096,7_Enh;E099,7_Enh;E101,7_Enh;E102,7_Enh;E104,7_Enh;E105,7_Enh;E106,7_Enh;E110,7_Enh;E117,2_TssAFlnk;E118,7_Enh;E119,7_Enh;E122,7_Enh;E127,2_TssAFlnk;E129,7_Enh	E083,7_Enh;E095,7_Enh;E104,7_Enh;E105,7_Enh	E057;E083;E084;E088;E109;E117;E123	E083
33	previously not reported	THRB	3:24465080:C:T	rs60325252	3	24465080	C	T	3:24463912:A:G	rs73041706	3	24463912	A	G	0.929791	E085,7_Enh
33	previously not reported	THRB	3:24465080:C:T	rs60325252	3	24465080	C	T	3:24464955:A:G	rs59212267	3	24464955	G	A	0.963106	E070,7_Enh;E084,7_Enh;E085,7_Enh
33	previously not reported	THRB	3:24465080:C:T	rs60325252	3	24465080	C	T	3:24465080:C:T	rs60325252	3	24465080	C	T	1	E070,7_Enh;E085,7_Enh;E123,7_Enh		E081
33	previously not reported	THRB	3:24465080:C:T	rs60325252	3	24465080	C	T	3:24475162:C:T	rs73032373	3	24475162	T	C	0.943135	E011,12_EnhBiv;E066,7_Enh;E083,7_Enh;E084,7_Enh;E085,7_Enh;E102,7_Enh;E118,6_EnhG	E083,7_Enh
33	previously not reported	THRB	3:24465080:C:T	rs60325252	3	24465080	C	T	3:24475505:D:I	rs35329851	3	24475505	I	C	0.967703	E065,7_Enh;E066,2_TssAFlnk;E070,7_Enh;E077,7_Enh;E083,7_Enh;E084,7_Enh;E085,7_Enh;E094,7_Enh;E102,7_Enh;E107,7_Enh;E108,7_Enh;E109,7_Enh;E118,7_Enh;E123,7_Enh	E083,7_Enh	E083;E084;E109	E083
34	previously not reported	TRAK1	3:42103045:G:T	rs11921457	3	42103045	T	G	3:42103045:G:T	rs11921457	3	42103045	T	G	1	E001,7_Enh;E002,7_Enh;E005,7_Enh;E006,7_Enh;E009,6_EnhG;E012,7_Enh;E013,7_Enh;E014,7_Enh;E015,7_Enh;E016,7_Enh;E017,7_Enh;E018,7_Enh;E020,7_Enh;E022,7_Enh;E023,2_TssAFlnk;E025,2_TssAFlnk;E026,2_TssAFlnk;E028,7_Enh;E029,7_Enh;E031,7_Enh;E032,7_Enh;E035,6_EnhG;E036,7_Enh;E049,7_Enh;E050,7_Enh;E051,7_Enh;E052,2_TssAFlnk;E053,7_Enh;E054,7_Enh;E055,2_TssAFlnk;E056,7_Enh;E057,7_Enh;E058,2_TssAFlnk;E059…	E083,2_TssAFlnk;E095,7_Enh;E104,7_Enh	E006;E017;E032;E051;E055;E056;E057;E059;E083;E088;E089;E090;E100;E114;E117;E120;E121;E122;E125;E126;E128	E083
35	previously not reported	LAMB2	3:49166069:C:T	rs9865051	3	49166069	C	T	3:48837182:C:T	rs9859473	3	48837182	T	C	0.901453	E077,7_Enh		E034
35	previously not reported	LAMB2	3:49166069:C:T	rs9865051	3	49166069	C	T	3:48846600:G:T	rs9879978	3	48846600	T	G	0.906033	E030,7_Enh
35	previously not reported	LAMB2	3:49166069:C:T	rs9865051	3	49166069	C	T	3:48953349:C:T	rs11707968	3	48953349	C	T	0.903507	E091,7_Enh;E123,7_Enh		E091
35	previously not reported	LAMB2	3:49166069:C:T	rs9865051	3	49166069	C	T	3:48960572:A:G	rs9284886	3	48960572	A	G	0.901561	E006,6_EnhG
35	previously not reported	LAMB2	3:49166069:C:T	rs9865051	3	49166069	C	T	3:48972351:A:C	rs7653408	3	48972351	A	C	0.903507	E037,7_Enh;E041,6_EnhG;E047,6_EnhG;E063,6_EnhG;E080,6_EnhG;E083,2_TssAFlnk;E097,6_EnhG;E100,2_TssAFlnk;E104,1_TssA;E107,1_TssA;E108,2_TssAFlnk;E121,6_EnhG;E123,6_EnhG	E083,2_TssAFlnk;E104,1_TssA	E080
35	previously not reported	LAMB2	3:49166069:C:T	rs9865051	3	49166069	C	T	3:48982732:A:G	rs9864243	3	48982732	G	A	0.904051	E032,6_EnhG;E041,6_EnhG;E042,7_Enh;E043,6_EnhG;E047,7_Enh;E059,6_EnhG;E069,7_Enh;E080,6_EnhG;E083,7_Enh;E087,7_Enh;E095,6_EnhG;E100,7_Enh;E105,7_Enh;E107,7_Enh;E108,7_Enh;E116,7_Enh;E121,7_Enh	E083,7_Enh;E095,6_EnhG;E105,7_Enh	E080
35	previously not reported	LAMB2	3:49166069:C:T	rs9865051	3	49166069	C	T	3:49053219:A:G	rs7100	3	49053219	A	G	0.888832	E055,6_EnhG;E058,6_EnhG;E059,3_TxFlnk;E061,6_EnhG;E119,6_EnhG		E056;E059
35	previously not reported	LAMB2	3:49166069:C:T	rs9865051	3	49166069	C	T	3:49054692:C:T	rs3087866	3	49054692	T	C	0.888907	E003,7_Enh;E005,6_EnhG;E006,6_EnhG;E009,6_EnhG;E010,6_EnhG;E011,1_TssA;E013,6_EnhG;E015,1_TssA;E017,6_EnhG;E018,1_TssA;E020,1_TssA;E022,7_Enh;E025,2_TssAFlnk;E026,1_TssA;E027,6_EnhG;E028,7_Enh;E029,7_Enh;E030,7_Enh;E032,7_Enh;E033,7_Enh;E034,7_Enh;E035,7_Enh;E036,6_EnhG;E037,7_Enh;E038,7_Enh;E039,7_Enh;E042,7_Enh;E043,7_Enh;E044,1_TssA;E046,7_Enh;E047,7_Enh;E048,7_Enh;E049,7_Enh;E050,7_Enh;E051,2…	E083,7_Enh
35	previously not reported	LAMB2	3:49166069:C:T	rs9865051	3	49166069	C	T	3:49070499:C:T	rs4974081	3	49070499	C	T	0.9135	E006,6_EnhG;E013,6_EnhG;E017,6_EnhG;E023,6_EnhG;E025,6_EnhG;E026,6_EnhG;E028,6_EnhG;E049,6_EnhG;E052,6_EnhG;E055,6_EnhG;E056,6_EnhG;E063,6_EnhG;E078,6_EnhG;E083,6_EnhG;E088,6_EnhG;E119,6_EnhG;E120,6_EnhG;E121,6_EnhG;E129,6_EnhG	E083,6_EnhG	E017;E055;E056;E088;E089;E097;E121
35	previously not reported	LAMB2	3:49166069:C:T	rs9865051	3	49166069	C	T	3:49088127:D:I	rs138950270	3	49088127	I	A	0.881249	E023,2_TssAFlnk;E025,7_Enh;E063,7_Enh
35	previously not reported	LAMB2	3:49166069:C:T	rs9865051	3	49166069	C	T	3:49093377:A:G	rs6798112	3	49093377	A	G	0.91556	E023,7_Enh;E025,6_EnhG		E055;E056;E117;E120
35	previously not reported	LAMB2	3:49166069:C:T	rs9865051	3	49166069	C	T	3:49166069:C:T	rs9865051	3	49166069	C	T	1	E006,6_EnhG;E055,6_EnhG;E056,3_TxFlnk;E089,6_EnhG;E098,6_EnhG;E105,6_EnhG;E108,6_EnhG	E105,6_EnhG	E109
35	previously not reported	LAMB2	3:49166069:C:T	rs9865051	3	49166069	C	T	3:49398514:A:C	rs892974	3	49398514	C	A	0.811995	E056,6_EnhG;E115,6_EnhG;E117,6_EnhG;E120,6_EnhG;E129,6_EnhG
35	previously not reported	LAMB2	3:49166069:C:T	rs9865051	3	49166069	C	T	3:49401153:C:T	rs6446262	3	49401153	T	C	0.837964	E006,6_EnhG;E017,6_EnhG;E025,6_EnhG;E026,6_EnhG;E027,6_EnhG;E028,7_Enh;E049,6_EnhG;E052,6_EnhG;E055,6_EnhG;E057,6_EnhG;E115,6_EnhG;E116,6_EnhG;E120,6_EnhG;E121,6_EnhG;E125,6_EnhG;E126,6_EnhG;E128,6_EnhG;E129,6_EnhG
35	previously not reported	LAMB2	3:49166069:C:T	rs9865051	3	49166069	C	T	3:49425167:A:G	rs62259943	3	49425167	A	G	0.836905	E017,7_Enh;E029,7_Enh;E034,7_Enh;E037,7_Enh;E044,6_EnhG;E052,7_Enh;E055,7_Enh;E090,7_Enh;E124,7_Enh
35	previously not reported	LAMB2	3:49166069:C:T	rs9865051	3	49166069	C	T	3:49439924:C:T	rs62259947	3	49439924	T	C	0.837964	E027,6_EnhG;E030,6_EnhG;E033,6_EnhG;E034,7_Enh;E037,7_Enh;E040,7_Enh;E041,6_EnhG;E042,6_EnhG;E043,6_EnhG;E044,6_EnhG;E046,6_EnhG;E047,7_Enh;E054,7_Enh;E061,6_EnhG		E083	E083
35	previously not reported	LAMB2	3:49166069:C:T	rs9865051	3	49166069	C	T	3:49448423:A:G	rs73088137	3	49448423	G	A	0.835919	E001,1_TssA;E002,1_TssA;E003,1_TssA;E004,1_TssA;E005,1_TssA;E007,1_TssA;E008,1_TssA;E009,1_TssA;E010,1_TssA;E011,1_TssA;E012,1_TssA;E013,1_TssA;E014,1_TssA;E015,1_TssA;E016,1_TssA;E017,1_TssA;E018,1_TssA;E019,1_TssA;E020,1_TssA;E021,1_TssA;E022,1_TssA;E023,1_TssA;E024,1_TssA;E025,1_TssA;E026,1_TssA;E027,1_TssA;E028,1_TssA;E029,2_TssAFlnk;E030,2_TssAFlnk;E031,2_TssAFlnk;E032,1_TssA;E033,2_TssAFlnk…	E083,2_TssAFlnk;E095,1_TssA;E104,1_TssA;E105,1_TssA	E004;E034;E080;E093;E117
35	previously not reported	LAMB2	3:49166069:C:T	rs9865051	3	49166069	C	T	3:49483193:C:T	rs138084484	3	49483193	C	T	0.829778	E029,7_Enh;E030,7_Enh;E031,7_Enh;E091,7_Enh;E124,2_TssAFlnk
35	previously not reported	LAMB2	3:49166069:C:T	rs9865051	3	49166069	C	T	3:49508976:C:T	rs7613491	3	49508976	T	C	0.832815	E001,1_TssA;E002,1_TssA;E003,1_TssA;E004,7_Enh;E005,1_TssA;E007,7_Enh;E008,1_TssA;E009,2_TssAFlnk;E010,2_TssAFlnk;E011,1_TssA;E012,1_TssA;E013,1_TssA;E014,2_TssAFlnk;E015,2_TssAFlnk;E016,2_TssAFlnk;E017,2_TssAFlnk;E018,2_TssAFlnk;E019,2_TssAFlnk;E020,2_TssAFlnk;E022,1_TssA;E023,2_TssAFlnk;E024,2_TssAFlnk;E025,1_TssA;E026,2_TssAFlnk;E027,1_TssA;E028,2_TssAFlnk;E029,7_Enh;E030,7_Enh;E031,2_TssAFlnk…	E083,2_TssAFlnk;E095,1_TssA;E104,1_TssA;E105,1_TssA	E084;E092
35	previously not reported	LAMB2	3:49166069:C:T	rs9865051	3	49166069	C	T	3:49510931:A:G	rs7647973	3	49510931	G	A	0.820046	E039,7_Enh;E059,7_Enh;E083,7_Enh;E089,6_EnhG;E091,7_Enh;E098,7_Enh;E107,7_Enh;E108,7_Enh;E110,7_Enh;E123,6_EnhG	E083,7_Enh	E050;E051;E123
35	previously not reported	LAMB2	3:49166069:C:T	rs9865051	3	49166069	C	T	3:49524778:C:G	rs6783003	3	49524778	G	C	0.822602	E006,7_Enh;E034,6_EnhG;E090,6_EnhG;E107,7_Enh;E108,7_Enh
35	previously not reported	LAMB2	3:49166069:C:T	rs9865051	3	49166069	C	T	3:49547170:D:I	rs11405695	3	49547170	D	I	0.82973	E090,7_Enh;E107,7_Enh;E118,7_Enh
36	previously not reported	ADCY5	3:123117165:C:T	rs1000368	3	123117165	C	T	3:123121286:A:G	rs12496583	3	123121286	A	G	0.926863	E027,6_EnhG;E063,7_Enh;E065,7_Enh;E067,7_Enh;E072,7_Enh;E073,7_Enh;E076,2_TssAFlnk;E083,7_Enh;E089,7_Enh;E090,7_Enh;E092,6_EnhG;E097,7_Enh;E098,7_Enh;E103,7_Enh;E107,7_Enh;E108,7_Enh;E111,2_TssAFlnk	E083,7_Enh	E083;E089;E120;E121	E083
36	previously not reported	ADCY5	3:123117165:C:T	rs1000368	3	123117165	C	T	3:123122637:A:T	rs62262407	3	123122637	T	A	0.917823	E027,7_Enh;E063,2_TssAFlnk;E065,1_TssA;E068,7_Enh;E072,7_Enh;E074,7_Enh;E076,7_Enh;E078,7_Enh;E083,7_Enh;E084,7_Enh;E089,7_Enh;E090,7_Enh;E092,7_Enh;E095,7_Enh;E097,7_Enh;E103,2_TssAFlnk;E107,7_Enh;E111,2_TssAFlnk	E083,7_Enh;E095,7_Enh	E083	E083
36	previously not reported	ADCY5	3:123117165:C:T	rs1000368	3	123117165	C	T	3:123124824:C:G	rs67946200	3	123124824	G	C	0.925762	E014,7_Enh;E022,7_Enh;E027,7_Enh;E063,7_Enh;E068,7_Enh;E071,7_Enh;E072,7_Enh;E073,7_Enh;E074,7_Enh;E076,7_Enh;E080,7_Enh;E083,7_Enh;E084,7_Enh;E089,7_Enh;E090,7_Enh;E091,7_Enh;E092,7_Enh;E095,7_Enh;E097,7_Enh;E103,7_Enh;E104,7_Enh;E105,7_Enh;E107,7_Enh;E108,7_Enh;E111,2_TssAFlnk;E113,7_Enh	E083,7_Enh;E095,7_Enh;E104,7_Enh;E105,7_Enh
36	previously not reported	ADCY5	3:123117165:C:T	rs1000368	3	123117165	C	T	3:123125779:A:G	rs62262427	3	123125779	A	G	0.913866	E003,7_Enh;E005,7_Enh;E022,7_Enh;E023,7_Enh;E024,7_Enh;E027,7_Enh;E063,7_Enh;E065,7_Enh;E066,7_Enh;E067,7_Enh;E068,2_TssAFlnk;E069,7_Enh;E071,7_Enh;E072,7_Enh;E073,7_Enh;E074,7_Enh;E076,7_Enh;E080,7_Enh;E083,7_Enh;E084,7_Enh;E085,7_Enh;E089,7_Enh;E090,7_Enh;E091,7_Enh;E092,7_Enh;E095,7_Enh;E097,7_Enh;E098,7_Enh;E100,7_Enh;E103,7_Enh;E104,7_Enh;E105,7_Enh;E107,7_Enh;E108,7_Enh;E111,2_TssAFlnk;E113…	E083,7_Enh;E095,7_Enh;E104,7_Enh;E105,7_Enh	E083	E083
36	previously not reported	ADCY5	3:123117165:C:T	rs1000368	3	123117165	C	T	3:123126268:C:T	rs57572875	3	123126268	T	C	0.940157	E066,7_Enh;E072,7_Enh;E076,7_Enh;E083,7_Enh;E090,7_Enh;E103,7_Enh;E111,7_Enh	E083,7_Enh	E083	E083
38	previously not reported	RAP2B	3:153000092:C:T	rs4680046	3	153000092	C	T	3:152987467:A:C	rs9841427	3	152987467	A	C	0.820676	E066,7_Enh
38	previously not reported	RAP2B	3:153000092:C:T	rs4680046	3	153000092	C	T	3:152988883:G:T	rs6783139	3	152988883	T	G	0.821762	E061,7_Enh
38	previously not reported	RAP2B	3:153000092:C:T	rs4680046	3	153000092	C	T	3:152989224:A:G	rs1160635	3	152989224	G	A	0.822852	E038,7_Enh;E061,7_Enh
38	previously not reported	RAP2B	3:153000092:C:T	rs4680046	3	153000092	C	T	3:152990087:C:T	rs9819147	3	152990087	C	T	0.827055	E061,7_Enh
38	previously not reported	RAP2B	3:153000092:C:T	rs4680046	3	153000092	C	T	3:152992193:D:I	rs11293959	3	152992193	I	C	0.854308	E023,1_TssA;E025,1_TssA;E026,7_Enh;E028,7_Enh;E049,7_Enh;E052,7_Enh;E061,7_Enh;E121,7_Enh;E126,7_Enh;E128,7_Enh;E129,7_Enh		E090
38	previously not reported	RAP2B	3:153000092:C:T	rs4680046	3	153000092	C	T	3:152992240:C:T	rs9830030	3	152992240	C	T	0.854436	E023,2_TssAFlnk;E025,2_TssAFlnk;E026,2_TssAFlnk;E028,7_Enh;E049,7_Enh;E052,7_Enh;E059,7_Enh;E061,7_Enh;E121,7_Enh;E126,7_Enh;E128,7_Enh;E129,7_Enh
38	previously not reported	RAP2B	3:153000092:C:T	rs4680046	3	153000092	C	T	3:152992359:A:T	rs9850308	3	152992359	T	A	0.854995	E023,2_TssAFlnk;E025,2_TssAFlnk;E026,2_TssAFlnk;E028,7_Enh;E049,7_Enh;E052,7_Enh;E059,7_Enh;E061,7_Enh;E121,7_Enh;E126,7_Enh;E128,7_Enh;E129,7_Enh
38	previously not reported	RAP2B	3:153000092:C:T	rs4680046	3	153000092	C	T	3:152992716:A:G	rs9868297	3	152992716	A	G	0.831141	E023,7_Enh;E025,2_TssAFlnk;E026,2_TssAFlnk;E028,7_Enh;E052,7_Enh;E059,7_Enh;E061,7_Enh;E121,7_Enh;E125,7_Enh;E126,7_Enh;E128,7_Enh;E129,7_Enh		E059
38	previously not reported	RAP2B	3:153000092:C:T	rs4680046	3	153000092	C	T	3:152994772:A:G	rs7355869	3	152994772	G	A	0.981028	E017,7_Enh;E028,7_Enh;E049,7_Enh;E057,7_Enh;E058,7_Enh;E068,7_Enh;E099,7_Enh;E119,7_Enh;E120,7_Enh;E127,7_Enh
38	previously not reported	RAP2B	3:153000092:C:T	rs4680046	3	153000092	C	T	3:152996074:C:T	rs9822986	3	152996074	C	T	0.853601	E119,7_Enh;E127,7_Enh
38	previously not reported	RAP2B	3:153000092:C:T	rs4680046	3	153000092	C	T	3:152996756:C:T	rs9289895	3	152996756	C	T	0.857227	E057,7_Enh;E058,7_Enh;E059,7_Enh;E119,7_Enh;E127,7_Enh		E057;E126;E127
38	previously not reported	RAP2B	3:153000092:C:T	rs4680046	3	153000092	C	T	3:152997569:G:T	rs4680044	3	152997569	G	T	0.859989	E025,7_Enh;E057,7_Enh;E126,7_Enh		E114
38	previously not reported	RAP2B	3:153000092:C:T	rs4680046	3	153000092	C	T	3:152997756:A:G	rs4680045	3	152997756	A	G	0.859989	E025,7_Enh;E057,7_Enh;E126,7_Enh
39	previously not reported	MLF1*	3:158333891:A:G	rs6799180	3	158333891	A	G	3:158286103:C:T	rs7613814	3	158286103	C	T	0.890442	E083,7_Enh	E083,7_Enh
39	previously not reported	MLF1*	3:158333891:A:G	rs6799180	3	158333891	A	G	3:158287455:A:G	rs2276773	3	158287455	A	G	0.890442	E083,7_Enh;E105,7_Enh;E107,7_Enh	E083,7_Enh;E105,7_Enh	E083	E083
39	previously not reported	MLF1*	3:158333891:A:G	rs6799180	3	158333891	A	G	3:158288810:C:G	rs9819631	3	158288810	C	G	0.894896	E001,1_TssA;E002,10_TssBiv;E003,10_TssBiv;E005,1_TssA;E006,1_TssA;E008,1_TssA;E009,1_TssA;E010,1_TssA;E011,1_TssA;E012,10_TssBiv;E013,1_TssA;E014,10_TssBiv;E015,10_TssBiv;E016,10_TssBiv;E017,1_TssA;E018,10_TssBiv;E019,10_TssBiv;E020,10_TssBiv;E021,1_TssA;E022,1_TssA;E023,1_TssA;E024,1_TssA;E025,1_TssA;E026,1_TssA;E027,1_TssA;E028,1_TssA;E029,11_BivFlnk;E030,11_BivFlnk;E031,1_TssA;E032,2_TssAFlnk;…	E083,1_TssA;E095,1_TssA;E104,1_TssA;E105,1_TssA	E003;E004;E005;E006;E007;E008;E021;E022;E028;E029;E032;E033;E034;E046;E050;E051;E055;E056;E057;E059;E080;E081;E082;E083;E084;E085;E086;E088;E089;E090;E091;E092;E093;E094;E097;E098;E100;E109;E114;E119;E120;E121;E122;E123;E124;E125;E126;E127;E128	E083
39	previously not reported	MLF1*	3:158333891:A:G	rs6799180	3	158333891	A	G	3:158290352:C:T	rs17629360	3	158290352	C	T	0.898123	E003,12_EnhBiv;E009,2_TssAFlnk;E010,7_Enh;E021,7_Enh;E022,7_Enh;E027,7_Enh;E054,7_Enh;E057,7_Enh;E068,1_TssA;E070,2_TssAFlnk;E071,7_Enh;E072,2_TssAFlnk;E073,1_TssA;E074,2_TssAFlnk;E076,1_TssA;E079,7_Enh;E081,7_Enh;E083,1_TssA;E086,1_TssA;E088,7_Enh;E089,7_Enh;E092,7_Enh;E095,1_TssA;E096,7_Enh;E097,7_Enh;E104,1_TssA;E105,2_TssAFlnk;E107,1_TssA;E108,2_TssAFlnk;E111,2_TssAFlnk	E083,1_TssA;E095,1_TssA;E104,1_TssA;E105,2_TssAFlnk	E083	E083
39	previously not reported	MLF1*	3:158333891:A:G	rs6799180	3	158333891	A	G	3:158290565:A:G	rs62287933	3	158290565	A	G	0.898123	E003,12_EnhBiv;E005,7_Enh;E022,7_Enh;E027,7_Enh;E054,7_Enh;E057,7_Enh;E068,1_TssA;E070,7_Enh;E071,7_Enh;E072,2_TssAFlnk;E073,1_TssA;E079,7_Enh;E081,7_Enh;E083,1_TssA;E089,7_Enh;E092,7_Enh;E094,7_Enh;E095,1_TssA;E096,7_Enh;E097,7_Enh;E104,1_TssA;E105,2_TssAFlnk;E107,1_TssA;E108,1_TssA;E111,7_Enh;E123,7_Enh	E083,1_TssA;E095,1_TssA;E104,1_TssA;E105,2_TssAFlnk	E083	E083
39	previously not reported	MLF1*	3:158333891:A:G	rs6799180	3	158333891	A	G	3:158290607:G:T	rs17629390	3	158290607	T	G	0.898123	E012,12_EnhBiv;E022,7_Enh;E027,7_Enh;E051,7_Enh;E053,7_Enh;E054,7_Enh;E068,1_TssA;E069,7_Enh;E070,7_Enh;E071,7_Enh;E072,2_TssAFlnk;E073,2_TssAFlnk;E079,7_Enh;E081,7_Enh;E083,1_TssA;E089,7_Enh;E095,2_TssAFlnk;E096,7_Enh;E097,7_Enh;E100,7_Enh;E104,1_TssA;E105,1_TssA;E107,1_TssA;E108,2_TssAFlnk;E111,7_Enh;E123,7_Enh;E125,7_Enh	E083,1_TssA;E095,2_TssAFlnk;E104,1_TssA;E105,1_TssA	E083	E083
39	previously not reported	MLF1*	3:158333891:A:G	rs6799180	3	158333891	A	G	3:158290717:C:T	rs17629414	3	158290717	T	C	0.898123	E012,12_EnhBiv;E022,7_Enh;E027,7_Enh;E051,7_Enh;E053,7_Enh;E054,7_Enh;E068,1_TssA;E069,7_Enh;E070,7_Enh;E071,7_Enh;E072,2_TssAFlnk;E073,2_TssAFlnk;E079,7_Enh;E081,7_Enh;E083,1_TssA;E089,7_Enh;E095,2_TssAFlnk;E096,7_Enh;E097,7_Enh;E100,7_Enh;E104,1_TssA;E105,1_TssA;E107,1_TssA;E108,2_TssAFlnk;E111,7_Enh;E123,7_Enh;E125,7_Enh	E083,1_TssA;E095,2_TssAFlnk;E104,1_TssA;E105,1_TssA	E083;E088	E083
39	previously not reported	MLF1*	3:158333891:A:G	rs6799180	3	158333891	A	G	3:158291055:G:T	rs4680445	3	158291055	T	G	0.898123	E072,7_Enh;E104,1_TssA;E105,1_TssA;E108,1_TssA;E120,1_TssA;E123,7_Enh	E104,1_TssA;E105,1_TssA	E004;E051;E088;E092
39	previously not reported	MLF1*	3:158333891:A:G	rs6799180	3	158333891	A	G	3:158295170:C:T	rs6779426	3	158295170	C	T	0.894101	E083,7_Enh	E083,7_Enh
39	previously not reported	MLF1*	3:158333891:A:G	rs6799180	3	158333891	A	G	3:158295171:C:T	rs6792449	3	158295171	T	C	0.894101	E083,7_Enh	E083,7_Enh
39	previously not reported	MLF1*	3:158333891:A:G	rs6799180	3	158333891	A	G	3:158296916:C:T	rs7631310	3	158296916	C	T	0.898123	E083,7_Enh	E083,7_Enh
39	previously not reported	MLF1*	3:158333891:A:G	rs6799180	3	158333891	A	G	3:158307511:C:T	rs6788285	3	158307511	C	T	0.898123	E065,7_Enh
39	previously not reported	MLF1*	3:158333891:A:G	rs6799180	3	158333891	A	G	3:158307512:A:G	rs6763812	3	158307512	A	G	0.898123	E065,7_Enh
39	previously not reported	MLF1*	3:158333891:A:G	rs6799180	3	158333891	A	G	3:158316650:A:G	rs12107643	3	158316650	G	A	0.976015	E052,7_Enh
39	previously not reported	MLF1*	3:158333891:A:G	rs6799180	3	158333891	A	G	3:158350118:C:T	rs4680449	3	158350118	T	C	0.991918	E001,7_Enh;E003,7_Enh;E007,7_Enh;E008,7_Enh;E009,7_Enh;E010,7_Enh;E012,7_Enh;E014,7_Enh;E015,2_TssAFlnk;E016,7_Enh;E018,7_Enh;E021,7_Enh;E024,7_Enh;E053,7_Enh;E054,7_Enh;E070,7_Enh		E007;E022
39	previously not reported	MLF1*	3:158333891:A:G	rs6799180	3	158333891	A	G	3:158362441:C:T	rs1864507	3	158362441	T	C	1	E001,1_TssA;E002,1_TssA;E003,1_TssA;E004,1_TssA;E005,1_TssA;E006,1_TssA;E007,1_TssA;E008,1_TssA;E009,1_TssA;E010,1_TssA;E011,1_TssA;E012,1_TssA;E013,1_TssA;E014,1_TssA;E015,1_TssA;E016,1_TssA;E017,1_TssA;E018,1_TssA;E019,1_TssA;E020,1_TssA;E021,1_TssA;E022,1_TssA;E023,1_TssA;E024,1_TssA;E025,1_TssA;E026,1_TssA;E027,1_TssA;E028,1_TssA;E029,1_TssA;E030,2_TssAFlnk;E031,1_TssA;E032,1_TssA;E033,1_TssA…	E095,1_TssA;E104,3_TxFlnk;E105,1_TssA	E003;E004;E005;E006;E007;E008;E017;E028;E029;E032;E033;E034;E046;E050;E051;E055;E056;E057;E059;E080;E081;E082;E083;E084;E085;E086;E089;E090;E091;E092;E093;E098;E100;E109;E116;E117;E118;E119;E120;E121;E122;E123;E124;E125;E126	E083
39	previously not reported	MLF1*	3:158333891:A:G	rs6799180	3	158333891	A	G	3:158365719:C:T	rs6781342	3	158365719	C	T	1	E076,6_EnhG
39	previously not reported	MLF1*	3:158333891:A:G	rs6799180	3	158333891	A	G	3:158366206:A:G	rs1864503	3	158366206	A	G	1	E122,6_EnhG
39	previously not reported	MLF1*	3:158333891:A:G	rs6799180	3	158333891	A	G	3:158366900:A:G	rs2303909	3	158366900	G	A	1	E028,6_EnhG;E080,6_EnhG;E122,6_EnhG
39	previously not reported	MLF1*	3:158333891:A:G	rs6799180	3	158333891	A	G	3:158368524:A:C	rs12639052	3	158368524	A	C	0.980091	E080,6_EnhG;E122,6_EnhG
39	previously not reported	MLF1*	3:158333891:A:G	rs6799180	3	158333891	A	G	3:158374391:D:I	rs34850894	3	158374391	D	I	1	E110,7_Enh;E114,6_EnhG
39	previously not reported	MLF1*	3:158333891:A:G	rs6799180	3	158333891	A	G	3:158374709:C:T	rs9819567	3	158374709	T	C	1	E066,6_EnhG;E110,7_Enh;E114,6_EnhG
39	previously not reported	MLF1*	3:158333891:A:G	rs6799180	3	158333891	A	G	3:158377554:G:T	rs4680452	3	158377554	G	T	1	E035,7_Enh;E041,6_EnhG;E050,6_EnhG;E051,2_TssAFlnk;E071,6_EnhG;E080,6_EnhG;E114,6_EnhG;E122,6_EnhG		E050;E122
39	previously not reported	MLF1*	3:158333891:A:G	rs6799180	3	158333891	A	G	3:158377797:C:G	rs4680453	3	158377797	C	G	1	E035,7_Enh;E050,6_EnhG;E051,7_Enh;E071,6_EnhG;E086,6_EnhG;E114,6_EnhG;E122,6_EnhG;E129,6_EnhG		E006;E017;E032;E033;E050;E051;E055;E056;E057;E059;E080;E081;E082;E083;E086;E088;E089;E090;E093;E097;E100;E120;E121;E122;E123;E125;E126;E128	E083
39	previously not reported	MLF1*	3:158333891:A:G	rs6799180	3	158333891	A	G	3:158388780:C:T	rs8455	3	158388780	T	C	1	E017,3_TxFlnk;E025,2_TssAFlnk;E036,7_Enh;E043,7_Enh;E048,7_Enh;E050,7_Enh;E051,7_Enh;E055,7_Enh;E085,6_EnhG;E088,1_TssA;E116,7_Enh;E122,1_TssA;E128,2_TssAFlnk;E129,2_TssAFlnk
39	previously not reported	MLF1*	3:158333891:A:G	rs6799180	3	158333891	A	G	3:158402791:D:I	rs138346088	3	158402791	D	I	1	E017,7_Enh;E026,7_Enh;E122,6_EnhG;E125,7_Enh;E129,7_Enh
39	previously not reported	MLF1*	3:158333891:A:G	rs6799180	3	158333891	A	G	3:158418014:A:G	rs6779431	3	158418014	A	G	0.987959	E025,7_Enh;E050,7_Enh;E051,7_Enh;E052,7_Enh;E117,7_Enh;E122,7_Enh;E123,6_EnhG;E126,7_Enh;E129,7_Enh
40	previously not reported	FNDC3B	3:171800256:A:G	rs4894803	3	171800256	A	G	3:171774601:C:G	rs17460016	3	171774601	G	C	0.806009	E004,7_Enh;E009,6_EnhG;E010,6_EnhG;E011,6_EnhG;E012,7_Enh;E013,6_EnhG;E018,7_Enh;E023,7_Enh;E025,2_TssAFlnk;E026,6_EnhG;E027,7_Enh;E028,6_EnhG;E029,7_Enh;E030,7_Enh;E036,6_EnhG;E037,7_Enh;E039,7_Enh;E040,7_Enh;E041,7_Enh;E042,7_Enh;E043,7_Enh;E044,7_Enh;E047,7_Enh;E049,6_EnhG;E050,7_Enh;E052,6_EnhG;E055,7_Enh;E061,7_Enh;E063,7_Enh;E066,7_Enh;E071,7_Enh;E076,7_Enh;E077,7_Enh;E078,7_Enh;E080,7_Enh;…	E104,7_Enh
40	previously not reported	FNDC3B	3:171800256:A:G	rs4894803	3	171800256	A	G	3:171785168:C:G	rs9647379	3	171785168	G	C	0.82157	E013,6_EnhG;E016,7_Enh;E017,7_Enh;E020,7_Enh;E023,7_Enh;E025,7_Enh;E026,6_EnhG;E027,6_EnhG;E028,6_EnhG;E029,7_Enh;E030,7_Enh;E033,7_Enh;E036,6_EnhG;E038,7_Enh;E039,7_Enh;E041,7_Enh;E043,7_Enh;E047,7_Enh;E048,7_Enh;E049,6_EnhG;E050,7_Enh;E051,7_Enh;E052,6_EnhG;E055,7_Enh;E057,6_EnhG;E063,7_Enh;E066,7_Enh;E075,7_Enh;E076,7_Enh;E077,7_Enh;E078,7_Enh;E082,7_Enh;E084,7_Enh;E085,7_Enh;E086,7_Enh;E087,7…	E105,7_Enh	E034;E093
40	previously not reported	FNDC3B	3:171800256:A:G	rs4894803	3	171800256	A	G	3:171800256:A:G	rs4894803	3	171800256	A	G	1	E013,6_EnhG;E017,6_EnhG;E023,7_Enh;E025,7_Enh;E026,6_EnhG;E027,6_EnhG;E028,6_EnhG;E049,6_EnhG;E052,7_Enh;E056,7_Enh;E063,7_Enh;E066,6_EnhG;E067,7_Enh;E068,7_Enh;E069,7_Enh;E071,7_Enh;E072,7_Enh;E074,7_Enh;E076,7_Enh;E077,7_Enh;E083,7_Enh;E086,7_Enh;E088,7_Enh;E090,7_Enh;E091,7_Enh;E092,7_Enh;E095,7_Enh;E097,7_Enh;E098,6_EnhG;E099,7_Enh;E100,7_Enh;E101,6_EnhG;E102,6_EnhG;E103,7_Enh;E104,7_Enh;E107…	E083,7_Enh;E095,7_Enh;E104,7_Enh	E006;E017;E028;E055;E056;E057;E059;E080;E083;E086;E088;E089;E090;E091;E092;E093;E094;E098;E100;E120;E121;E123;E125;E126;E128	E083
41	previously not reported	FGF12	3:192373761:A:C	rs4687352	3	192373761	A	C	3:192359833:C:G	rs1875735	3	192359833	C	G	0.869163	E083,7_Enh	E083,7_Enh	E006;E083;E117	E083
41	previously not reported	FGF12	3:192373761:A:C	rs4687352	3	192373761	A	C	3:192359938:C:T	rs1875736	3	192359938	C	T	0.97198	E083,7_Enh	E083,7_Enh	E006;E117
41	previously not reported	FGF12	3:192373761:A:C	rs4687352	3	192373761	A	C	3:192360059:A:G	rs1875737	3	192360059	A	G	0.944807	E083,7_Enh	E083,7_Enh	E006;E083;E117	E083
41	previously not reported	FGF12	3:192373761:A:C	rs4687352	3	192373761	A	C	3:192360122:A:G	rs1875738	3	192360122	A	G	0.968903	E083,7_Enh	E083,7_Enh	E006;E083;E117	E083
41	previously not reported	FGF12	3:192373761:A:C	rs4687352	3	192373761	A	C	3:192361064:D:I	rs5855442	3	192361064	D	I	0.902574	E083,7_Enh	E083,7_Enh
41	previously not reported	FGF12	3:192373761:A:C	rs4687352	3	192373761	A	C	3:192361854:C:G	rs12638325	3	192361854	G	C	0.955304	E083,7_Enh	E083,7_Enh	E117
41	previously not reported	FGF12	3:192373761:A:C	rs4687352	3	192373761	A	C	3:192362182:C:G	rs1503588	3	192362182	G	C	0.908581	E083,7_Enh	E083,7_Enh	E117
41	previously not reported	FGF12	3:192373761:A:C	rs4687352	3	192373761	A	C	3:192362210:A:G	rs1503589	3	192362210	A	G	0.903206	E083,7_Enh	E083,7_Enh	E117
41	previously not reported	FGF12	3:192373761:A:C	rs4687352	3	192373761	A	C	3:192362352:C:T	rs6768898	3	192362352	T	C	0.985949	E083,7_Enh	E083,7_Enh	E117
41	previously not reported	FGF12	3:192373761:A:C	rs4687352	3	192373761	A	C	3:192362656:A:G	rs9876194	3	192362656	G	A	0.902353	E083,7_Enh	E083,7_Enh	E117
41	previously not reported	FGF12	3:192373761:A:C	rs4687352	3	192373761	A	C	3:192363339:C:T	rs4592975	3	192363339	C	T	0.986728	E083,7_Enh	E083,7_Enh	E117
41	previously not reported	FGF12	3:192373761:A:C	rs4687352	3	192373761	A	C	3:192363417:A:G	rs4585145	3	192363417	G	A	0.955304	E083,7_Enh	E083,7_Enh	E117
41	previously not reported	FGF12	3:192373761:A:C	rs4687352	3	192373761	A	C	3:192363650:A:G	rs9881554	3	192363650	G	A	0.955304	E083,7_Enh	E083,7_Enh
41	previously not reported	FGF12	3:192373761:A:C	rs4687352	3	192373761	A	C	3:192363686:C:T	rs9881315	3	192363686	C	T	0.953703	E083,7_Enh	E083,7_Enh
41	previously not reported	FGF12	3:192373761:A:C	rs4687352	3	192373761	A	C	3:192366329:A:C	rs9868365	3	192366329	C	A	0.986728	E083,7_Enh	E083,7_Enh
41	previously not reported	FGF12	3:192373761:A:C	rs4687352	3	192373761	A	C	3:192366341:A:G	rs9291030	3	192366341	G	A	0.986728	E083,7_Enh	E083,7_Enh
41	previously not reported	FGF12	3:192373761:A:C	rs4687352	3	192373761	A	C	3:192367902:C:G	rs2174179	3	192367902	C	G	0.988285	E083,7_Enh	E083,7_Enh	E083	E083
41	previously not reported	FGF12	3:192373761:A:C	rs4687352	3	192373761	A	C	3:192369093:A:G	rs9809169	3	192369093	G	A	0.987501	E083,7_Enh	E083,7_Enh
41	previously not reported	FGF12	3:192373761:A:C	rs4687352	3	192373761	A	C	3:192370033:A:G	rs3898006	3	192370033	G	A	0.986727	E083,7_Enh	E083,7_Enh	E083	E083
41	previously not reported	FGF12	3:192373761:A:C	rs4687352	3	192373761	A	C	3:192370065:A:C	rs953603	3	192370065	C	A	0.906251	E083,7_Enh	E083,7_Enh	E083	E083
41	previously not reported	FGF12	3:192373761:A:C	rs4687352	3	192373761	A	C	3:192370340:A:G	rs7426991	3	192370340	G	A	0.987501	E001,7_Enh;E016,7_Enh;E083,7_Enh	E083,7_Enh	E083	E083
41	previously not reported	FGF12	3:192373761:A:C	rs4687352	3	192373761	A	C	3:192370532:A:G	rs9815063	3	192370532	G	A	0.987506	E001,7_Enh;E014,7_Enh;E015,7_Enh;E016,7_Enh;E018,7_Enh;E020,7_Enh;E083,7_Enh	E083,7_Enh	E008;E083	E083
41	previously not reported	FGF12	3:192373761:A:C	rs4687352	3	192373761	A	C	3:192370648:G:T	rs9834961	3	192370648	T	G	0.956787	E001,7_Enh;E008,7_Enh;E014,7_Enh;E015,7_Enh;E016,7_Enh;E018,7_Enh;E019,7_Enh;E020,7_Enh;E083,7_Enh	E083,7_Enh	E004;E008;E022;E083;E117	E083
41	previously not reported	FGF12	3:192373761:A:C	rs4687352	3	192373761	A	C	3:192370738:A:T	rs9852619	3	192370738	A	T	0.988285	E001,7_Enh;E008,7_Enh;E014,7_Enh;E015,7_Enh;E016,7_Enh;E018,7_Enh;E019,7_Enh;E020,7_Enh;E083,7_Enh	E083,7_Enh	E003;E004;E021;E022;E083;E117	E083
41	previously not reported	FGF12	3:192373761:A:C	rs4687352	3	192373761	A	C	3:192370870:C:T	rs9819020	3	192370870	C	T	0.988285	E001,7_Enh;E008,7_Enh;E014,7_Enh;E015,7_Enh;E016,7_Enh;E018,7_Enh;E019,7_Enh;E020,7_Enh;E083,7_Enh	E083,7_Enh	E083;E117	E083
41	previously not reported	FGF12	3:192373761:A:C	rs4687352	3	192373761	A	C	3:192371065:A:G	rs2366850	3	192371065	A	G	0.988285	E001,7_Enh;E015,7_Enh;E016,7_Enh;E018,7_Enh;E019,7_Enh;E020,7_Enh;E083,7_Enh	E083,7_Enh
41	previously not reported	FGF12	3:192373761:A:C	rs4687352	3	192373761	A	C	3:192371185:C:T	rs2366851	3	192371185	T	C	0.987501	E001,7_Enh;E015,7_Enh;E016,7_Enh;E018,7_Enh;E019,7_Enh;E020,7_Enh;E083,7_Enh	E083,7_Enh
41	previously not reported	FGF12	3:192373761:A:C	rs4687352	3	192373761	A	C	3:192371328:C:T	rs2366852	3	192371328	T	C	0.988285	E001,7_Enh;E016,7_Enh;E083,7_Enh	E083,7_Enh
41	previously not reported	FGF12	3:192373761:A:C	rs4687352	3	192373761	A	C	3:192371402:A:G	rs2886785	3	192371402	A	G	0.988285	E001,7_Enh;E083,7_Enh	E083,7_Enh
41	previously not reported	FGF12	3:192373761:A:C	rs4687352	3	192373761	A	C	3:192372110:A:G	rs9825096	3	192372110	G	A	0.906401	E083,7_Enh	E083,7_Enh
41	previously not reported	FGF12	3:192373761:A:C	rs4687352	3	192373761	A	C	3:192372207:D:I	rs11359433	3	192372207	I	T	0.98907	E083,7_Enh	E083,7_Enh
41	previously not reported	FGF12	3:192373761:A:C	rs4687352	3	192373761	A	C	3:192372585:A:G	rs7621372	3	192372585	G	A	0.957531	E083,7_Enh	E083,7_Enh	E083	E083
41	previously not reported	FGF12	3:192373761:A:C	rs4687352	3	192373761	A	C	3:192372772:A:G	rs1503595	3	192372772	A	G	0.903212	E004,7_Enh;E083,7_Enh	E083,7_Enh
41	previously not reported	FGF12	3:192373761:A:C	rs4687352	3	192373761	A	C	3:192372800:C:T	rs1503594	3	192372800	T	C	0.985186	E004,7_Enh;E083,7_Enh	E083,7_Enh
41	previously not reported	FGF12	3:192373761:A:C	rs4687352	3	192373761	A	C	3:192372820:G:T	rs1503593	3	192372820	T	G	0.953089	E004,7_Enh;E083,7_Enh	E083,7_Enh	E083	E083
41	previously not reported	FGF12	3:192373761:A:C	rs4687352	3	192373761	A	C	3:192373660:A:G	rs4234623	3	192373660	G	A	0.973038	E001,7_Enh;E083,7_Enh	E083,7_Enh	E083;E091;E117	E083
41	previously not reported	FGF12	3:192373761:A:C	rs4687352	3	192373761	A	C	3:192373666:A:G	rs4687351	3	192373666	G	A	0.973038	E001,7_Enh;E083,7_Enh	E083,7_Enh	E083;E117	E083
41	previously not reported	FGF12	3:192373761:A:C	rs4687352	3	192373761	A	C	3:192373671:C:T	rs2886786	3	192373671	C	T	0.94125	E001,7_Enh;E083,7_Enh	E083,7_Enh	E083;E117	E083
41	previously not reported	FGF12	3:192373761:A:C	rs4687352	3	192373761	A	C	3:192373673:C:T	rs2366853	3	192373673	C	T	0.973038	E001,7_Enh;E083,7_Enh	E083,7_Enh	E083;E117	E083
41	previously not reported	FGF12	3:192373761:A:C	rs4687352	3	192373761	A	C	3:192373761:A:C	rs4687352	3	192373761	A	C	1	E001,7_Enh;E083,7_Enh	E083,7_Enh	E083;E117	E083
41	previously not reported	FGF12	3:192373761:A:C	rs4687352	3	192373761	A	C	3:192373791:A:G	rs2886787	3	192373791	A	G	0.998439	E001,7_Enh;E083,7_Enh	E083,7_Enh	E083;E117	E083
41	previously not reported	FGF12	3:192373761:A:C	rs4687352	3	192373761	A	C	3:192373813:A:G	rs9868627	3	192373813	A	G	0.997657	E083,7_Enh	E083,7_Enh	E117
41	previously not reported	FGF12	3:192373761:A:C	rs4687352	3	192373761	A	C	3:192373817:A:G	rs9868628	3	192373817	A	G	0.914391	E083,7_Enh	E083,7_Enh
41	previously not reported	FGF12	3:192373761:A:C	rs4687352	3	192373761	A	C	3:192374022:C:G	rs4234624	3	192374022	G	C	0.955207	E083,7_Enh	E083,7_Enh
41	previously not reported	FGF12	3:192373761:A:C	rs4687352	3	192373761	A	C	3:192374368:C:G	rs9835809	3	192374368	C	G	0.983659	E004,7_Enh;E083,7_Enh;E105,7_Enh	E083,7_Enh;E105,7_Enh	E083;E117	E083
41	previously not reported	FGF12	3:192373761:A:C	rs4687352	3	192373761	A	C	3:192374485:A:T	rs9873551	3	192374485	A	T	0.954391	E083,7_Enh;E105,7_Enh	E083,7_Enh;E105,7_Enh	E083	E083
41	previously not reported	FGF12	3:192373761:A:C	rs4687352	3	192373761	A	C	3:192375440:C:T	rs9813078	3	192375440	C	T	0.954428	E083,7_Enh	E083,7_Enh
41	previously not reported	FGF12	3:192373761:A:C	rs4687352	3	192373761	A	C	3:192375843:A:C	rs6809426	3	192375843	A	C	0.946428	E083,7_Enh	E083,7_Enh
41	previously not reported	FGF12	3:192373761:A:C	rs4687352	3	192373761	A	C	3:192375852:A:G	rs6809430	3	192375852	A	G	0.946428	E083,7_Enh	E083,7_Enh
41	previously not reported	FGF12	3:192373761:A:C	rs4687352	3	192373761	A	C	3:192375865:C:T	rs6785550	3	192375865	C	T	0.946428	E083,7_Enh	E083,7_Enh
41	previously not reported	FGF12	3:192373761:A:C	rs4687352	3	192373761	A	C	3:192375881:C:T	rs6798455	3	192375881	T	C	0.946428	E083,7_Enh	E083,7_Enh
41	previously not reported	FGF12	3:192373761:A:C	rs4687352	3	192373761	A	C	3:192375982:C:T	rs6798557	3	192375982	T	C	0.84602	E083,7_Enh	E083,7_Enh
41	previously not reported	FGF12	3:192373761:A:C	rs4687352	3	192373761	A	C	3:192376137:C:T	rs6798763	3	192376137	T	C	0.8445	E083,7_Enh;E095,7_Enh	E083,7_Enh;E095,7_Enh	E083	E083
41	previously not reported	FGF12	3:192373761:A:C	rs4687352	3	192373761	A	C	3:192376139:A:C	rs6809774	3	192376139	A	C	0.953613	E083,7_Enh;E095,7_Enh	E083,7_Enh;E095,7_Enh	E083	E083
41	previously not reported	FGF12	3:192373761:A:C	rs4687352	3	192373761	A	C	3:192376619:C:T	rs7645453	3	192376619	T	C	0.932091	E083,7_Enh	E083,7_Enh
41	previously not reported	FGF12	3:192373761:A:C	rs4687352	3	192373761	A	C	3:192376632:C:T	rs7633689	3	192376632	C	T	0.931289	E083,7_Enh	E083,7_Enh
41	previously not reported	FGF12	3:192373761:A:C	rs4687352	3	192373761	A	C	3:192376925:C:T	rs6788998	3	192376925	C	T	0.954391	E083,7_Enh	E083,7_Enh
41	previously not reported	FGF12	3:192373761:A:C	rs4687352	3	192373761	A	C	3:192377208:A:G	rs6789503	3	192377208	G	A	0.8898	E083,7_Enh	E083,7_Enh
41	previously not reported	FGF12	3:192373761:A:C	rs4687352	3	192373761	A	C	3:192378518:A:G	rs61413473	3	192378518	A	G	0.952157	E083,7_Enh	E083,7_Enh
42	previously not reported	DLG1	3:196799232:D:I	rs143879787	3	196799232	I	C	3:196803647:C:T	rs12632559	3	196803647	T	C	0.993955	E009,6_EnhG;E010,2_TssAFlnk;E053,7_Enh;E054,7_Enh;E069,7_Enh;E072,7_Enh
42	previously not reported	DLG1	3:196799232:D:I	rs143879787	3	196799232	I	C	3:196911361:C:T	rs12152266	3	196911361	C	T	0.979074	E003,7_Enh;E014,7_Enh;E019,7_Enh;E020,7_Enh;E063,7_Enh;E067,7_Enh;E074,7_Enh;E087,1_TssA
42	previously not reported	DLG1	3:196799232:D:I	rs143879787	3	196799232	I	C	3:196939883:C:T	rs7616531	3	196939883	C	T	0.971247	E003,7_Enh;E004,7_Enh;E014,7_Enh;E015,7_Enh;E016,7_Enh;E018,7_Enh;E019,7_Enh;E020,7_Enh;E024,7_Enh;E057,6_EnhG;E074,7_Enh
43	previously not reported	SRD5A3	4:56123105:A:G	rs77422711	4	56123105	G	A	4:56123105:A:G	rs77422711	4	56123105	G	A	1	E005,7_Enh;E008,7_Enh;E009,7_Enh;E010,7_Enh;E011,7_Enh;E012,7_Enh;E013,7_Enh;E015,7_Enh;E016,7_Enh;E018,7_Enh;E019,7_Enh;E020,7_Enh;E021,7_Enh;E050,12_EnhBiv;E051,12_EnhBiv;E080,7_Enh;E083,7_Enh;E095,7_Enh;E099,7_Enh;E104,7_Enh	E083,7_Enh;E095,7_Enh;E104,7_Enh	E004;E005;E006;E050;E083;E122	E083
43	previously not reported	SRD5A3	4:56123105:A:G	rs77422711	4	56123105	G	A	4:56136027:G:T	rs13126307	4	56136027	T	G	0.896745	E013,7_Enh;E019,7_Enh;E020,7_Enh;E088,7_Enh;E096,7_Enh;E113,7_Enh;E122,7_Enh		E122
43	previously not reported	SRD5A3	4:56123105:A:G	rs77422711	4	56123105	G	A	4:56186000:C:T	rs35463994	4	56186000	C	T	0.84393	E014,7_Enh;E027,7_Enh;E033,7_Enh;E037,7_Enh;E039,7_Enh;E041,7_Enh;E048,7_Enh;E050,7_Enh;E122,7_Enh
44	previously not reported	LPHN3	4:62409801:C:G	rs28540500	4	62409801	G	C	4:62409714:A:T	rs28684820	4	62409714	T	A	1	E127,7_Enh		E028;E057
44	previously not reported	LPHN3	4:62409801:C:G	rs28540500	4	62409801	G	C	4:62409801:C:G	rs28540500	4	62409801	G	C	1	E019,7_Enh		E028;E057;E119
44	previously not reported	LPHN3	4:62409801:C:G	rs28540500	4	62409801	G	C	4:62409950:C:G	rs67283284	4	62409950	C	G	0.997298	E019,7_Enh		E028;E057;E117;E119
45	previously not reported	FGF5	4:81202048:G:T	rs36034102	4	81202048	G	T	4:81202048:G:T	rs36034102	4	81202048	G	T	1	E055,3_TxFlnk;E056,6_EnhG;E126,6_EnhG;E129,6_EnhG
46	previously not reported	PDLIM5	4:95506214:A:G	rs2172448	4	95506214	G	A	4:95500223:C:T	rs3805266	4	95500223	C	T	0.976854	E010,7_Enh;E017,7_Enh;E023,7_Enh;E025,7_Enh;E026,6_EnhG;E049,7_Enh;E052,7_Enh;E054,1_TssA;E129,7_Enh
46	previously not reported	PDLIM5	4:95506214:A:G	rs2172448	4	95506214	G	A	4:95503578:C:T	rs3843444	4	95503578	T	C	0.973419	E025,7_Enh;E026,6_EnhG;E049,6_EnhG;E052,7_Enh;E083,6_EnhG;E107,7_Enh;E114,7_Enh;E122,7_Enh;E129,7_Enh	E083,6_EnhG
46	previously not reported	PDLIM5	4:95506214:A:G	rs2172448	4	95506214	G	A	4:95510638:A:G	rs4634230	4	95510638	G	A	0.917575	E023,7_Enh;E025,7_Enh;E026,6_EnhG;E049,7_Enh;E052,7_Enh;E076,7_Enh;E083,7_Enh;E086,7_Enh;E126,7_Enh;E129,6_EnhG	E083,7_Enh	E055;E056;E086;E089;E090;E120;E121;E126;E128
46	previously not reported	PDLIM5	4:95506214:A:G	rs2172448	4	95506214	G	A	4:95514609:A:C	rs12500426	4	95514609	A	C	0.919763	E083,7_Enh;E095,6_EnhG	E083,7_Enh;E095,6_EnhG	E083	E083
46	previously not reported	PDLIM5	4:95506214:A:G	rs2172448	4	95506214	G	A	4:95517914:D:I	rs36227776	4	95517914	I	A	0.858129	E030,7_Enh
46	previously not reported	PDLIM5	4:95506214:A:G	rs2172448	4	95506214	G	A	4:95521358:C:G	rs12648941	4	95521358	C	G	0.847647	E065,7_Enh;E083,6_EnhG	E083,6_EnhG
47	previously not reported	MYOZ2*	4:120070079:A:T	rs78277783	4	120070079	T	A	4:120062451:A:G	rs62326299	4	120062451	A	G	0.970439	E039,7_Enh;E083,6_EnhG;E095,1_TssA;E104,1_TssA;E105,1_TssA	E083,6_EnhG;E095,1_TssA;E104,1_TssA;E105,1_TssA
47	previously not reported	MYOZ2*	4:120070079:A:T	rs78277783	4	120070079	T	A	4:120063158:A:G	rs55932281	4	120063158	A	G	0.970439	E018,7_Enh;E083,3_TxFlnk;E095,3_TxFlnk;E104,1_TssA;E105,1_TssA;E107,7_Enh;E108,7_Enh;E114,7_Enh	E083,3_TxFlnk;E095,3_TxFlnk;E104,1_TssA;E105,1_TssA
47	previously not reported	MYOZ2*	4:120070079:A:T	rs78277783	4	120070079	T	A	4:120063715:C:T	rs7694500	4	120063715	C	T	0.960698	E001,7_Enh;E083,7_Enh;E095,3_TxFlnk;E104,1_TssA;E105,3_TxFlnk;E107,7_Enh;E108,7_Enh	E083,7_Enh;E095,3_TxFlnk;E104,1_TssA;E105,3_TxFlnk	E083	E083
47	previously not reported	MYOZ2*	4:120070079:A:T	rs78277783	4	120070079	T	A	4:120063843:A:G	rs7694555	4	120063843	A	G	0.960698	E001,7_Enh;E083,7_Enh;E104,1_TssA;E105,3_TxFlnk	E083,7_Enh;E104,1_TssA;E105,3_TxFlnk
47	previously not reported	MYOZ2*	4:120070079:A:T	rs78277783	4	120070079	T	A	4:120063893:A:T	rs55724227	4	120063893	T	A	0.960698	E001,7_Enh;E083,7_Enh;E104,1_TssA;E105,3_TxFlnk	E083,7_Enh;E104,1_TssA;E105,3_TxFlnk
47	previously not reported	MYOZ2*	4:120070079:A:T	rs78277783	4	120070079	T	A	4:120065616:C:T	rs62326301	4	120065616	C	T	0.990124	E042,7_Enh;E083,2_TssAFlnk;E104,1_TssA;E105,1_TssA	E083,2_TssAFlnk;E104,1_TssA;E105,1_TssA
47	previously not reported	MYOZ2*	4:120070079:A:T	rs78277783	4	120070079	T	A	4:120065643:A:T	rs62326319	4	120065643	T	A	0.990124	E042,7_Enh;E083,2_TssAFlnk;E104,1_TssA;E105,1_TssA	E083,2_TssAFlnk;E104,1_TssA;E105,1_TssA
47	previously not reported	MYOZ2*	4:120070079:A:T	rs78277783	4	120070079	T	A	4:120068633:C:T	rs62326320	4	120068633	T	C	1	E083,7_Enh;E105,1_TssA	E083,7_Enh;E105,1_TssA
47	previously not reported	MYOZ2*	4:120070079:A:T	rs78277783	4	120070079	T	A	4:120068920:G:T	rs72910519	4	120068920	T	G	1	E083,7_Enh;E105,1_TssA	E083,7_Enh;E105,1_TssA
47	previously not reported	MYOZ2*	4:120070079:A:T	rs78277783	4	120070079	T	A	4:120069488:G:T	rs57070054	4	120069488	G	T	1	E083,7_Enh;E104,1_TssA;E105,1_TssA	E083,7_Enh;E104,1_TssA;E105,1_TssA
47	previously not reported	MYOZ2*	4:120070079:A:T	rs78277783	4	120070079	T	A	4:120070079:A:T	rs78277783	4	120070079	T	A	1	E023,7_Enh;E083,7_Enh;E104,1_TssA;E105,1_TssA	E083,7_Enh;E104,1_TssA;E105,1_TssA
47	previously not reported	MYOZ2*	4:120070079:A:T	rs78277783	4	120070079	T	A	4:120073343:D:I	rs201588948	4	120073343	I	A	0.995045	E083,7_Enh	E083,7_Enh
47	previously not reported	MYOZ2*	4:120070079:A:T	rs78277783	4	120070079	T	A	4:120084950:C:G	rs56083532	4	120084950	C	G	1	E121,7_Enh
47	previously not reported	MYOZ2*	4:120070079:A:T	rs55928104	4	120070079	T	A	4:120086847:D:I		4	120086847	D	I	0.995044			E092
47	previously not reported	MYOZ2*	4:120070079:A:T	rs78277783	4	120070079	T	A	4:120094880:C:T	rs113588712	4	120094880	T	C	0.990117	E022,7_Enh
47	previously not reported	MYOZ2*	4:120070079:A:T	rs78277783	4	120070079	T	A	4:120095288:A:G	rs4834761	4	120095288	G	A	0.990117	E095,7_Enh	E095,7_Enh
47	previously not reported	MYOZ2*	4:120070079:A:T	rs78277783	4	120070079	T	A	4:120099617:A:T	rs62326341	4	120099617	A	T	0.995044	E001,7_Enh
47	previously not reported	MYOZ2*	4:120070079:A:T	rs78277783	4	120070079	T	A	4:120099793:A:G	rs62326342	4	120099793	G	A	0.995044	E001,7_Enh
48	previously not reported	SLC12A7	5:1054197:C:T	rs4975572	5	1054197	C	T	5:1044848:G:T	rs200104480	5	1044848	G	T	0.888564	E098,7_Enh;E113,7_Enh
48	previously not reported	SLC12A7	5:1054197:C:T	rs4975572	5	1054197	C	T	5:1045069:G:T	rs114894897	5	1045069	G	T	0.937199	E098,7_Enh;E113,7_Enh
48	previously not reported	SLC12A7	5:1054197:C:T	rs4975572	5	1054197	C	T	5:1045217:A:G	rs115884040	5	1045217	A	G	0.8852	E098,7_Enh;E113,7_Enh
48	previously not reported	SLC12A7	5:1054197:C:T	rs4975572	5	1054197	C	T	5:1048986:C:T	rs62329233	5	1048986	T	C	0.921867	E063,7_Enh
48	previously not reported	SLC12A7	5:1054197:C:T	rs4975572	5	1054197	C	T	5:1053396:C:G	rs2241603	5	1053396	C	G	0.89063	E027,6_EnhG;E079,6_EnhG;E089,12_EnhBiv;E090,6_EnhG;E095,6_EnhG;E105,6_EnhG;E108,12_EnhBiv;E126,7_Enh	E095,6_EnhG;E105,6_EnhG	E114;E126;E127
48	previously not reported	SLC12A7	5:1054197:C:T	rs4975572	5	1054197	C	T	5:1054197:C:T	rs4975572	5	1054197	C	T	1	E025,7_Enh;E027,6_EnhG;E089,12_EnhBiv;E090,6_EnhG;E095,6_EnhG;E105,6_EnhG;E107,12_EnhBiv;E108,7_Enh;E126,7_Enh	E095,6_EnhG;E105,6_EnhG	E029
48	previously not reported	SLC12A7	5:1054197:C:T	rs4975572	5	1054197	C	T	5:1059610:A:G	rs13152999	5	1059610	G	A	0.827945	E009,6_EnhG;E022,6_EnhG;E066,6_EnhG
48	previously not reported	SLC12A7	5:1054197:C:T	rs4975572	5	1054197	C	T	5:1060379:A:G	rs35661060	5	1060379	G	A	0.885634	E009,6_EnhG;E010,6_EnhG;E022,6_EnhG;E066,6_EnhG;E113,6_EnhG
48	previously not reported	SLC12A7	5:1109592:C:G	rs4639275	5	1109592	C	G	5:1109592:C:G	rs4639275	5	1109592	C	G	1	E003,7_Enh;E022,6_EnhG;E024,7_Enh;E027,7_Enh;E029,11_BivFlnk;E031,7_Enh;E032,7_Enh;E033,2_TssAFlnk;E034,7_Enh;E035,7_Enh;E036,2_TssAFlnk;E038,7_Enh;E039,7_Enh;E040,7_Enh;E041,7_Enh;E042,7_Enh;E043,7_Enh;E044,2_TssAFlnk;E046,7_Enh;E047,7_Enh;E048,7_Enh;E050,7_Enh;E051,2_TssAFlnk;E056,12_EnhBiv;E059,7_Enh;E061,2_TssAFlnk;E062,1_TssA;E063,1_TssA;E066,2_TssAFlnk;E071,1_TssA;E075,7_Enh;E076,7_Enh;E077…	E083,7_Enh;E095,1_TssA;E104,7_Enh;E105,1_TssA	E032;E083	E083
49	previously not reported	SUB1	5:32629419:A:G	rs17441816	5	32629419	A	G	5:32616255:C:T	rs922000	5	32616255	C	T	0.902694	E095,7_Enh;E107,7_Enh	E095,7_Enh
49	previously not reported	SUB1	5:32629419:A:G	rs17441816	5	32629419	A	G	5:32616850:A:G	rs72739271	5	32616850	A	G	0.954519	E108,7_Enh
49	previously not reported	SUB1	5:32629419:A:G	rs10941014	5	32629419	A	G	5:32627541:C:G		5	32627541	G	C	0.995957			E003;E121
49	previously not reported	SUB1	5:32629419:A:G	rs10941015	5	32629419	A	G	5:32627752:A:G		5	32627752	A	G	0.995957			E017;E117
49	previously not reported	SUB1	5:32629419:A:G	rs17441816	5	32629419	A	G	5:32627910:A:G	rs12173152	5	32627910	A	G	0.993276	E017,7_Enh;E023,7_Enh;E025,7_Enh;E026,7_Enh;E052,7_Enh;E055,12_EnhBiv;E065,7_Enh;E066,7_Enh;E080,7_Enh;E095,7_Enh;E096,7_Enh;E100,7_Enh;E104,7_Enh;E107,7_Enh;E108,7_Enh;E117,2_TssAFlnk;E125,7_Enh;E126,7_Enh;E129,7_Enh	E095,7_Enh;E104,7_Enh	E017
49	previously not reported	SUB1	5:32629419:A:G	rs17441816	5	32629419	A	G	5:32628441:C:T	rs17441762	5	32628441	C	T	0.983843	E017,7_Enh;E018,7_Enh;E023,7_Enh;E025,7_Enh;E026,7_Enh;E027,7_Enh;E052,7_Enh;E063,7_Enh;E065,7_Enh;E066,2_TssAFlnk;E083,7_Enh;E095,7_Enh;E096,7_Enh;E097,7_Enh;E098,7_Enh;E100,7_Enh;E104,7_Enh;E105,7_Enh;E107,7_Enh;E108,7_Enh;E117,2_TssAFlnk;E129,7_Enh	E083,7_Enh;E095,7_Enh;E104,7_Enh;E105,7_Enh	E003;E017;E086;E117;E120;E121;E125;E128
49	previously not reported	SUB1	5:32629419:A:G	rs17441816	5	32629419	A	G	5:32629204:A:G	rs62368620	5	32629204	G	A	0.985201	E023,7_Enh;E063,7_Enh;E066,7_Enh;E117,7_Enh		E117
49	previously not reported	SUB1	5:32629419:A:G	rs17441816	5	32629419	A	G	5:32629361:G:T	rs17441792	5	32629361	T	G	0.993256	E023,7_Enh;E063,7_Enh;E066,7_Enh;E117,7_Enh
49	previously not reported	SUB1	5:32629419:A:G	rs17441816	5	32629419	A	G	5:32629419:A:G	rs17441816	5	32629419	A	G	1	E023,7_Enh;E063,7_Enh;E066,7_Enh;E117,7_Enh
49	previously not reported	SUB1	5:32629419:A:G	rs17441816	5	32629419	A	G	5:32631856:C:T	rs62368622	5	32631856	T	C	0.868408	E066,7_Enh;E118,7_Enh
49	previously not reported	SUB1	5:32775047:G:T	rs1173743	5	32775047	G	T	5:32775047:G:T	rs1173743	5	32775047	G	T	1	E023,6_EnhG;E049,6_EnhG
49	previously not reported	SUB1	5:32775047:G:T	rs1173743	5	32775047	G	T	5:32781581:D:I	rs34653545	5	32781581	D	I	0.975601	E026,6_EnhG;E049,7_Enh
49	previously not reported	SUB1	5:32775047:G:T	rs1173743	5	32775047	G	T	5:32782152:A:C	rs1173747	5	32782152	C	A	0.987841	E026,6_EnhG;E049,6_EnhG
49	previously not reported	SUB1	5:32775047:G:T	rs1173743	5	32775047	G	T	5:32789852:C:T	rs1173756	5	32789852	T	C	0.967403	E026,6_EnhG;E050,6_EnhG;E051,6_EnhG;E056,7_Enh;E057,7_Enh;E120,7_Enh;E121,7_Enh;E126,7_Enh;E128,7_Enh
49	previously not reported	SUB1	5:32775047:G:T	rs1173743	5	32775047	G	T	5:32804528:C:T	rs1173766	5	32804528	T	C	0.825764	E056,7_Enh;E063,7_Enh		E056;E090
49	previously not reported	SUB1	5:32775047:G:T	rs1173743	5	32775047	G	T	5:32805031:C:T	rs1173768	5	32805031	T	C	0.808743	E056,7_Enh;E117,7_Enh
50	previously not reported	HCN1	5:45864843:A:G	rs10039283	5	45864843	G	A	5:45403735:C:T	rs4133429	5	45403735	T	C	0.80941	E001,7_Enh;E003,7_Enh;E011,7_Enh;E014,7_Enh;E015,7_Enh;E016,7_Enh;E018,7_Enh;E019,7_Enh;E021,7_Enh		E004
50	previously not reported	HCN1	5:45864843:A:G	rs10039283	5	45864843	G	A	5:45427137:A:G	rs6892290	5	45427137	A	G	0.812134	E108,7_Enh
50	previously not reported	HCN1	5:45864843:A:G	rs10039283	5	45864843	G	A	5:45427173:C:T	rs6892594	5	45427173	C	T	0.804168	E108,7_Enh
50	previously not reported	HCN1	5:45864843:A:G	rs6451802	5	45864843	G	A	5:45441027:C:G		5	45441027	C	G	0.807775			E081
50	previously not reported	HCN1	5:45864843:A:G	rs10039283	5	45864843	G	A	5:45492205:A:G	rs6451804	5	45492205	A	G	0.827149	E084,7_Enh
50	previously not reported	HCN1	5:45864843:A:G	rs10039283	5	45864843	G	A	5:45534423:C:G	rs6451807	5	45534423	C	G	0.843279	E014,7_Enh;E020,7_Enh;E083,7_Enh	E083,7_Enh	E003;E004;E007;E021;E022
50	previously not reported	HCN1	5:45864843:A:G	rs10039283	5	45864843	G	A	5:45553387:C:T	rs1384732	5	45553387	C	T	0.8347	E011,7_Enh;E014,7_Enh;E019,7_Enh;E020,7_Enh
50	previously not reported	HCN1	5:45864843:A:G	rs10039283	5	45864843	G	A	5:45561903:A:G	rs1351720	5	45561903	G	A	0.884269	E001,7_Enh;E002,7_Enh;E003,7_Enh;E014,2_TssAFlnk;E015,7_Enh;E016,7_Enh;E018,7_Enh;E019,7_Enh;E020,7_Enh;E021,7_Enh;E024,7_Enh
50	previously not reported	HCN1	5:45864843:A:G	rs10039283	5	45864843	G	A	5:45603206:C:T	rs2696013	5	45603206	C	T	0.835341	E083,7_Enh	E083,7_Enh
50	previously not reported	HCN1	5:45864843:A:G	rs10039283	5	45864843	G	A	5:45622496:A:C	rs6893773	5	45622496	C	A	0.850794	E001,7_Enh;E014,7_Enh
50	previously not reported	HCN1	5:45864843:A:G	rs10039283	5	45864843	G	A	5:45722994:A:C	rs6892627	5	45722994	A	C	0.824126	E007,7_Enh
50	previously not reported	HCN1	5:45864843:A:G	rs10039283	5	45864843	G	A	5:45725597:C:T	rs7718785	5	45725597	C	T	0.809357	E003,7_Enh;E014,7_Enh;E016,7_Enh;E019,7_Enh;E020,7_Enh;E080,7_Enh
50	previously not reported	HCN1	5:45864843:A:G	rs7706116	5	45864843	G	A	5:45742624:G:T		5	45742624	G	T	0.829752			E004
50	previously not reported	HCN1	5:45864843:A:G	rs201166606	5	45864843	G	A	5:45743991:A:G		5	45743991	A	G	0.859124			E050;E080;E086;E116;E128
50	previously not reported	HCN1	5:45864843:A:G	rs10039283	5	45864843	G	A	5:45844263:D:I	rs34054119	5	45844263	D	I	0.950888	E001,7_Enh
50	previously not reported	HCN1	5:45864843:A:G	rs10039283	5	45864843	G	A	5:45956719:C:T	rs4502836	5	45956719	T	C	0.838846	E083,1_TssA	E083,1_TssA
50	previously not reported	HCN1	5:45864843:A:G	rs10039283	5	45864843	G	A	5:46053564:C:T	rs8188026	5	46053564	C	T	0.880689	E104,1_TssA	E104,1_TssA
50	previously not reported	HCN1	5:45864843:A:G	rs12186454	5	45864843	G	A	5:46067723:A:C		5	46067723	A	C	0.868165			E004
50	previously not reported	HCN1	5:45864843:A:G	rs13155082	5	45864843	G	A	5:46155237:A:G		5	46155237	A	G	0.818307			E118
50	previously not reported	HCN1	5:45864843:A:G	rs4975965	5	45864843	G	A	5:46290389:A:G		5	46290389	A	G	0.824985			E051
50	previously not reported	HCN1	5:45864843:A:G	rs150699607	5	45864843	G	A	5:46322174:A:G		5	46322174	A	G	0.822184			E005
50	previously not reported	HCN1	5:45864843:A:G	rs11950489	5	45864843	G	A	5:46323133:A:G		5	46323133	G	A	0.89668			E003;E005;E007;E034;E051;E080;E094;E097;E098;E120;E121;E122
50	previously not reported	HCN1	5:45864843:A:G	rs8175383	5	45864843	G	A	5:46325385:A:C		5	46325385	A	C	0.822553			E007;E028
50	previously not reported	HCN1	5:45864843:A:G	rs8185178	5	45864843	G	A	5:46339544:C:T		5	46339544	C	T	0.812838			E008;E022;E034;E046;E051;E057;E059;E081;E089;E093;E097;E098;E116
50	previously not reported	HCN1	5:45864843:A:G	rs8185186	5	45864843	G	A	5:46339658:A:G		5	46339658	G	A	0.822579			E005
50	previously not reported	HCN1	5:45864843:A:G	rs10070024	5	45864843	G	A	5:46340344:C:G		5	46340344	C	G	0.89486			E003;E008;E057;E084;E094;E098;E116;E118
50	previously not reported	HCN1	5:45864843:A:G	rs12652297	5	45864843	G	A	5:46346216:C:T		5	46346216	C	T	0.820276			E004;E005;E006;E007;E017;E029;E032;E034;E050;E051;E059;E080;E081;E083;E093;E094;E097;E098;E100	E083
50	previously not reported	HCN1	5:45864843:A:G	rs10941802	5	45864843	G	A	5:46346961:A:G		5	46346961	G	A	0.824958			E050;E080
50	previously not reported	HCN1	5:45864843:A:G	rs10039283	5	45864843	G	A	5:46347213:D:I	rs112215619	5	46347213	D	I	0.822541	E065,1_TssA;E112,7_Enh		E003;E004;E005;E006;E007;E008;E017;E021;E022;E029;E032;E033;E034;E046;E051;E055;E056;E057;E059;E080;E082;E083;E084;E085;E086;E088;E089;E090;E091;E092;E093;E094;E097;E098;E100;E109;E114;E116;E118;E119;E120;E121;E122;E123;E125;E126;E127;E128	E083
50	previously not reported	HCN1	5:45864843:A:G	rs10039283	5	45864843	G	A	5:46347215:C:G	rs199602276	5	46347215	G	C	0.822541	E065,1_TssA;E112,7_Enh		E003;E004;E005;E006;E007;E008;E017;E021;E022;E029;E032;E033;E034;E046;E051;E055;E056;E057;E059;E080;E082;E083;E084;E085;E086;E088;E089;E090;E091;E092;E093;E094;E097;E098;E100;E109;E114;E116;E118;E119;E121;E122;E125;E127;E128	E083
50	previously not reported	HCN1	5:45864843:A:G	rs10039283	5	45864843	G	A	5:46347216:C:G	rs200778473	5	46347216	G	C	0.822541	E065,1_TssA;E112,7_Enh		E003;E004;E005;E006;E007;E008;E017;E021;E022;E029;E032;E033;E034;E046;E051;E055;E056;E057;E059;E080;E082;E083;E084;E085;E086;E088;E089;E090;E091;E092;E093;E094;E097;E098;E100;E109;E114;E116;E118;E119;E121;E122;E125;E127	E083
50	previously not reported	HCN1	5:45864843:A:G	rs12652727	5	45864843	G	A	5:46353859:C:T		5	46353859	T	C	0.81511			E017
50	previously not reported	HCN1	5:45864843:A:G	rs10051501	5	45864843	G	A	5:46361167:A:G		5	46361167	G	A	0.818066			E003;E005;E006;E008;E057;E116;E118;E119;E123
50	previously not reported	HCN1	5:45864843:A:G	rs8185191	5	45864843	G	A	5:46369985:C:G		5	46369985	G	C	0.819155			E050
50	previously not reported	HCN1	5:45864843:A:G	rs28855077	5	45864843	G	A	5:46378957:G:T		5	46378957	T	G	0.817319			E117
50	previously not reported	HCN1	5:45864843:A:G	rs10039283	5	45864843	G	A	5:46382426:A:G	rs8185324	5	46382426	G	A	0.818605	E045,1_TssA		E017;E050;E051;E118;E128
50	previously not reported	HCN1	5:45864843:A:G	rs12518343	5	45864843	G	A	5:46385261:A:T		5	46385261	A	T	0.815819			E046
50	previously not reported	HCN1	5:45864843:A:G	rs12652570	5	45864843	G	A	5:46392210:C:T		5	46392210	C	T	0.821815			E017
50	previously not reported	HCN1	5:45864843:A:G	rs142355706	5	45864843	G	A	5:46392306:C:T		5	46392306	C	T	0.81853			E005
50	previously not reported	HCN1	5:45864843:A:G	rs8185366	5	45864843	G	A	5:46394116:C:G		5	46394116	G	C	0.892994			E003;E005;E017;E046;E050;E051;E057;E080;E094;E097;E109;E118
51	previously not reported	NR2F1	5:92455655:A:G	rs4869412	5	92455655	A	G	5:92454197:D:I	rs148081655	5	92454197	I	C	0.847961	E007,7_Enh;E017,7_Enh;E025,7_Enh;E028,7_Enh;E052,7_Enh;E055,7_Enh;E061,7_Enh;E080,7_Enh;E083,7_Enh;E088,7_Enh;E117,7_Enh;E118,7_Enh;E119,7_Enh;E120,7_Enh;E121,7_Enh;E122,7_Enh;E125,7_Enh;E127,7_Enh;E128,7_Enh	E083,7_Enh	E122
51	previously not reported	NR2F1	5:92455655:A:G	rs4869412	5	92455655	A	G	5:92455655:A:G	rs4869412	5	92455655	A	G	1	E009,7_Enh;E010,7_Enh;E015,7_Enh;E018,7_Enh;E019,7_Enh;E053,7_Enh;E054,7_Enh;E119,7_Enh		E007
51	previously not reported	NR2F1	5:92455655:A:G	rs4869412	5	92455655	A	G	5:92461247:A:T	rs7711868	5	92461247	T	A	0.992154	E004,7_Enh
51	previously not reported	NR2F1	5:92455655:A:G	rs4869412	5	92455655	A	G	5:92464416:C:T	rs12519773	5	92464416	T	C	0.979	E111,7_Enh
51	previously not reported	NR2F1	5:92455655:A:G	rs4869412	5	92455655	A	G	5:92482226:A:G	rs4242239	5	92482226	A	G	0.937611	E049,7_Enh;E052,7_Enh;E129,7_Enh
51	previously not reported	NR2F1	5:92455655:A:G	rs4869412	5	92455655	A	G	5:92488009:A:G	rs67779882	5	92488009	A	G	0.897134	E009,7_Enh;E028,7_Enh;E049,7_Enh;E052,7_Enh;E055,7_Enh;E057,7_Enh;E111,1_TssA;E119,7_Enh;E120,7_Enh;E126,7_Enh;E128,7_Enh;E129,7_Enh
51	previously not reported	NR2F1	5:92455655:A:G	rs4869412	5	92455655	A	G	5:92488062:A:G	rs66496757	5	92488062	A	G	0.897134	E009,7_Enh;E028,7_Enh;E049,7_Enh;E052,7_Enh;E055,7_Enh;E057,7_Enh;E111,1_TssA;E119,7_Enh;E120,7_Enh;E126,7_Enh;E128,7_Enh;E129,7_Enh
52	previously not reported	FER*	5:108210304:A:G	rs6889995	5	108210304	A	G	5:108108500:A:G	rs3805599	5	108108500	A	G	0.960159	E083,7_Enh;E087,7_Enh;E088,7_Enh;E097,7_Enh;E123,7_Enh	E083,7_Enh
52	previously not reported	FER*	5:108210304:A:G	rs6889995	5	108210304	A	G	5:108111333:A:G	rs1396444	5	108111333	G	A	0.960159	E053,7_Enh;E061,7_Enh;E087,7_Enh
52	previously not reported	FER*	5:108210304:A:G	rs6889995	5	108210304	A	G	5:108117869:A:G	rs62361341	5	108117869	G	A	0.954608	E023,7_Enh;E027,7_Enh;E028,7_Enh;E049,7_Enh;E052,7_Enh;E074,7_Enh;E076,7_Enh;E100,7_Enh;E104,7_Enh;E119,7_Enh	E104,7_Enh
52	previously not reported	FER*	5:108210304:A:G	rs6889995	5	108210304	A	G	5:108120958:A:G	rs2009646	5	108120958	G	A	0.960159	E027,6_EnhG;E057,6_EnhG;E111,6_EnhG;E127,6_EnhG
52	previously not reported	FER*	5:108210304:A:G	rs6889995	5	108210304	A	G	5:108121356:A:G	rs2113001	5	108121356	G	A	0.960159	E005,7_Enh;E017,6_EnhG;E027,6_EnhG;E028,6_EnhG;E057,6_EnhG;E058,6_EnhG;E083,7_Enh;E127,7_Enh	E083,7_Enh
52	previously not reported	FER*	5:108210304:A:G	rs6889995	5	108210304	A	G	5:108121764:A:T	rs7724385	5	108121764	A	T	0.960159	E005,7_Enh;E017,6_EnhG;E083,7_Enh;E090,6_EnhG;E117,7_Enh;E121,7_Enh;E127,7_Enh	E083,7_Enh
52	previously not reported	FER*	5:108210304:A:G	rs6889995	5	108210304	A	G	5:108123171:C:G	rs2081127	5	108123171	C	G	0.960159	E006,6_EnhG;E069,7_Enh;E071,1_TssA;E072,7_Enh;E074,7_Enh;E079,7_Enh;E089,12_EnhBiv;E090,7_Enh;E105,6_EnhG;E107,7_Enh;E108,7_Enh;E111,7_Enh	E105,6_EnhG
52	previously not reported	FER*	5:108210304:A:G	rs6889995	5	108210304	A	G	5:108123506:C:T	rs2081128	5	108123506	T	C	0.960159	E056,6_EnhG;E068,7_Enh;E069,7_Enh;E071,1_TssA;E072,7_Enh;E074,7_Enh;E076,7_Enh;E079,7_Enh;E089,7_Enh;E090,7_Enh;E095,7_Enh;E096,6_EnhG;E105,6_EnhG;E107,7_Enh;E108,2_TssAFlnk;E111,7_Enh;E120,7_Enh	E095,7_Enh;E105,6_EnhG	E034
52	previously not reported	FER*	5:108210304:A:G	rs6889995	5	108210304	A	G	5:108124084:C:T	rs13360253	5	108124084	C	T	0.960159	E017,6_EnhG;E021,7_Enh;E025,6_EnhG;E027,7_Enh;E028,7_Enh;E052,2_TssAFlnk;E055,6_EnhG;E056,6_EnhG;E063,7_Enh;E067,7_Enh;E068,1_TssA;E069,2_TssAFlnk;E071,2_TssAFlnk;E072,2_TssAFlnk;E073,2_TssAFlnk;E074,7_Enh;E076,7_Enh;E079,6_EnhG;E083,7_Enh;E090,7_Enh;E094,7_Enh;E095,7_Enh;E096,6_EnhG;E097,6_EnhG;E098,7_Enh;E105,7_Enh;E107,2_TssAFlnk;E108,2_TssAFlnk;E111,7_Enh;E119,7_Enh;E127,7_Enh	E083,7_Enh;E095,7_Enh;E105,7_Enh	E083;E089;E090;E094;E098;E100;E120;E121;E126	E083
52	previously not reported	FER*	5:108210304:A:G	rs6889995	5	108210304	A	G	5:108124235:D:I	rs111580201	5	108124235	D	I	0.927061	E027,7_Enh;E028,7_Enh;E052,2_TssAFlnk;E067,2_TssAFlnk;E068,7_Enh;E069,2_TssAFlnk;E071,7_Enh;E072,7_Enh;E073,2_TssAFlnk;E074,7_Enh;E076,7_Enh;E079,6_EnhG;E083,7_Enh;E090,7_Enh;E104,7_Enh;E107,7_Enh;E108,2_TssAFlnk;E111,7_Enh	E083,7_Enh;E104,7_Enh	E083	E083
52	previously not reported	FER*	5:108210304:A:G	rs6889995	5	108210304	A	G	5:108124779:A:G	rs62361344	5	108124779	G	A	0.960159	E027,7_Enh;E068,7_Enh;E069,7_Enh;E071,7_Enh;E072,7_Enh;E074,7_Enh;E083,7_Enh;E108,7_Enh;E111,7_Enh	E083,7_Enh
52	previously not reported	FER*	5:108210304:A:G	rs6889995	5	108210304	A	G	5:108125303:D:I	rs112328583	5	108125303	D	I	0.954139	E069,7_Enh
52	previously not reported	FER*	5:108210304:A:G	rs6889995	5	108210304	A	G	5:108127411:A:G	rs6888173	5	108127411	A	G	0.960159	E028,6_EnhG;E127,7_Enh
52	previously not reported	FER*	5:108210304:A:G	rs6889995	5	108210304	A	G	5:108128002:A:T	rs62361345	5	108128002	T	A	0.960159	E044,1_TssA;E057,7_Enh;E125,7_Enh;E127,7_Enh;E129,7_Enh		E028
52	previously not reported	FER*	5:108210304:A:G	rs6889995	5	108210304	A	G	5:108144429:A:G	rs6874773	5	108144429	G	A	0.960159	E114,7_Enh
52	previously not reported	FER*	5:108210304:A:G	rs6889995	5	108210304	A	G	5:108144458:C:T	rs6874497	5	108144458	C	T	0.960159	E114,7_Enh
52	previously not reported	FER*	5:108210304:A:G	rs6889995	5	108210304	A	G	5:108144662:A:G	rs6875158	5	108144662	G	A	0.960159	E114,7_Enh
52	previously not reported	FER*	5:108210304:A:G	rs6889995	5	108210304	A	G	5:108146126:C:T	rs4537096	5	108146126	C	T	0.960159	E079,7_Enh;E119,7_Enh
52	previously not reported	FER*	5:108210304:A:G	rs6889995	5	108210304	A	G	5:108147894:A:G	rs75196817	5	108147894	A	G	0.960159	E009,7_Enh;E016,7_Enh;E018,7_Enh
52	previously not reported	FER*	5:108210304:A:G	rs6889995	5	108210304	A	G	5:108148805:C:T	rs62363280	5	108148805	T	C	0.960159	E014,7_Enh;E016,7_Enh;E025,7_Enh;E076,7_Enh
52	previously not reported	FER*	5:108210304:A:G	rs6889995	5	108210304	A	G	5:108148835:C:T	rs62363281	5	108148835	C	T	0.960159	E014,7_Enh;E016,7_Enh;E025,7_Enh;E076,7_Enh
52	previously not reported	FER*	5:108210304:A:G	rs6889995	5	108210304	A	G	5:108149069:A:G	rs28633642	5	108149069	G	A	0.960159	E014,7_Enh;E016,7_Enh;E023,7_Enh;E025,1_TssA;E061,7_Enh;E076,7_Enh;E103,7_Enh		E089;E090
52	previously not reported	FER*	5:108210304:A:G	rs6889995	5	108210304	A	G	5:108149792:D:I	rs59660200	5	108149792	D	I	0.960159	E023,2_TssAFlnk;E025,2_TssAFlnk;E061,7_Enh;E076,7_Enh;E083,7_Enh;E103,7_Enh;E111,2_TssAFlnk	E083,7_Enh	E089;E090
52	previously not reported	FER*	5:108210304:A:G	rs6889995	5	108210304	A	G	5:108150158:G:T	rs9885265	5	108150158	G	T	0.960159	E017,7_Enh;E023,2_TssAFlnk;E025,2_TssAFlnk;E058,7_Enh;E061,7_Enh;E076,2_TssAFlnk;E094,7_Enh;E103,7_Enh;E111,1_TssA
52	previously not reported	FER*	5:108210304:A:G	rs6889995	5	108210304	A	G	5:108150188:G:T	rs9885428	5	108150188	T	G	0.960159	E017,7_Enh;E023,2_TssAFlnk;E025,2_TssAFlnk;E058,7_Enh;E061,7_Enh;E076,2_TssAFlnk;E094,7_Enh;E103,7_Enh;E111,1_TssA
52	previously not reported	FER*	5:108210304:A:G	rs6889995	5	108210304	A	G	5:108151711:C:G	rs57703314	5	108151711	G	C	0.960159	E076,7_Enh
52	previously not reported	FER*	5:108210304:A:G	rs6889995	5	108210304	A	G	5:108152069:C:T	rs75981347	5	108152069	T	C	0.960159	E018,7_Enh;E061,7_Enh
52	previously not reported	FER*	5:108210304:A:G	rs6889995	5	108210304	A	G	5:108153401:A:C	rs62363283	5	108153401	A	C	0.960159	E017,7_Enh;E025,7_Enh;E049,2_TssAFlnk;E052,7_Enh;E076,7_Enh;E078,7_Enh;E129,7_Enh
52	previously not reported	FER*	5:108210304:A:G	rs10050547	5	108210304	A	G	5:108156879:A:G		5	108156879	A	G	0.960159			E080
52	previously not reported	FER*	5:108210304:A:G	rs6889995	5	108210304	A	G	5:108162509:C:T	rs6876606	5	108162509	C	T	0.971705	E011,1_TssA
52	previously not reported	FER*	5:108210304:A:G	rs6889995	5	108210304	A	G	5:108164591:A:G	rs62363287	5	108164591	G	A	0.971705	E011,7_Enh
52	previously not reported	FER*	5:108210304:A:G	rs6889995	5	108210304	A	G	5:108165445:C:T	rs889269	5	108165445	T	C	0.971705	E011,7_Enh
52	previously not reported	FER*	5:108210304:A:G	rs6889995	5	108210304	A	G	5:108166136:C:T	rs13354622	5	108166136	T	C	0.971705	E011,7_Enh;E083,7_Enh;E095,7_Enh;E104,7_Enh	E083,7_Enh;E095,7_Enh;E104,7_Enh
52	previously not reported	FER*	5:108210304:A:G	rs6889995	5	108210304	A	G	5:108167061:A:G	rs6873917	5	108167061	A	G	0.971705	E011,7_Enh;E083,7_Enh	E083,7_Enh
52	previously not reported	FER*	5:108210304:A:G	rs6889995	5	108210304	A	G	5:108167682:A:T	rs4283844	5	108167682	A	T	0.971705	E010,7_Enh;E016,7_Enh;E020,7_Enh;E083,7_Enh	E083,7_Enh
52	previously not reported	FER*	5:108210304:A:G	rs6889995	5	108210304	A	G	5:108167897:D:I	rs5870332	5	108167897	I	G	0.971705	E008,7_Enh;E009,7_Enh;E010,7_Enh;E016,7_Enh;E020,7_Enh;E072,7_Enh;E083,7_Enh	E083,7_Enh
52	previously not reported	FER*	5:108210304:A:G	rs6889995	5	108210304	A	G	5:108167904:D:I	rs144311716	5	108167904	I	C	0.971705	E008,7_Enh;E009,7_Enh;E010,7_Enh;E016,7_Enh;E020,7_Enh;E072,7_Enh;E083,7_Enh	E083,7_Enh
52	previously not reported	FER*	5:108210304:A:G	rs6889995	5	108210304	A	G	5:108168142:A:G	rs4361568	5	108168142	A	G	0.965914	E001,7_Enh;E008,7_Enh;E009,7_Enh;E010,7_Enh;E014,7_Enh;E016,7_Enh;E020,7_Enh;E072,7_Enh;E083,7_Enh;E123,7_Enh	E083,7_Enh
52	previously not reported	FER*	5:108210304:A:G	rs6889995	5	108210304	A	G	5:108172540:A:T	rs6863046	5	108172540	A	T	0.971705	E014,7_Enh;E018,7_Enh;E024,7_Enh
52	previously not reported	FER*	5:108210304:A:G	rs6889995	5	108210304	A	G	5:108173003:A:G	rs9326750	5	108173003	G	A	0.977287	E018,7_Enh
52	previously not reported	FER*	5:108210304:A:G	rs6889995	5	108210304	A	G	5:108189715:C:T	rs13359423	5	108189715	T	C	0.971401	E087,7_Enh;E091,7_Enh
52	previously not reported	FER*	5:108210304:A:G	rs10039951	5	108210304	A	G	5:108190727:A:G		5	108190727	G	A	0.94275			E091
52	previously not reported	FER*	5:108210304:A:G	rs6889995	5	108210304	A	G	5:108194467:D:I	rs200932820	5	108194467	I	A	0.948715	E023,2_TssAFlnk;E025,2_TssAFlnk;E029,7_Enh;E030,7_Enh;E031,7_Enh;E036,7_Enh;E052,7_Enh;E083,7_Enh;E116,1_TssA;E124,7_Enh;E126,7_Enh;E127,7_Enh	E083,7_Enh	E118
52	previously not reported	FER*	5:108210304:A:G	rs6889995	5	108210304	A	G	5:108194472:C:T	rs200584255	5	108194472	T	C	0.948715	E023,2_TssAFlnk;E025,2_TssAFlnk;E029,7_Enh;E030,7_Enh;E031,7_Enh;E036,7_Enh;E052,7_Enh;E083,7_Enh;E116,1_TssA;E124,7_Enh;E126,7_Enh;E127,7_Enh	E083,7_Enh	E118
52	previously not reported	FER*	5:108210304:A:G	rs6889995	5	108210304	A	G	5:108203264:D:I	rs113463407	5	108203264	D	I	0.971401	E029,7_Enh;E030,7_Enh;E036,7_Enh;E124,2_TssAFlnk
52	previously not reported	FER*	5:108210304:A:G	rs6889995	5	108210304	A	G	5:108204013:A:G	rs62360779	5	108204013	A	G	0.971401	E029,7_Enh;E124,7_Enh
52	previously not reported	FER*	5:108210304:A:G	rs6889995	5	108210304	A	G	5:108208280:C:T	rs41508849	5	108208280	T	C	0.971401	E028,7_Enh;E058,7_Enh;E119,7_Enh;E127,7_Enh
52	previously not reported	FER*	5:108210304:A:G	rs6889995	5	108210304	A	G	5:108209206:A:G	rs79524055	5	108209206	G	A	1	E001,7_Enh;E013,7_Enh;E025,6_EnhG;E028,7_Enh;E055,7_Enh;E057,7_Enh;E058,7_Enh;E119,7_Enh;E120,6_EnhG;E127,2_TssAFlnk;E129,7_Enh		E028;E057;E127
52	previously not reported	FER*	5:108210304:A:G	rs6889995	5	108210304	A	G	5:108209488:C:T	rs62360783	5	108209488	C	T	1	E001,7_Enh;E005,7_Enh;E025,6_EnhG;E028,7_Enh;E057,7_Enh;E058,7_Enh;E119,7_Enh;E120,6_EnhG;E127,7_Enh;E129,7_Enh		E005
52	previously not reported	FER*	5:108210304:A:G	rs6889995	5	108210304	A	G	5:108209645:G:T	rs80034202	5	108209645	G	T	1	E025,6_EnhG;E028,7_Enh;E057,7_Enh;E058,7_Enh;E119,7_Enh;E120,7_Enh;E127,7_Enh		E005;E055;E119
52	previously not reported	FER*	5:108210304:A:G	rs6889995	5	108210304	A	G	5:108211588:G:T	rs6594341	5	108211588	G	T	1	E001,7_Enh;E023,7_Enh;E025,7_Enh
52	previously not reported	FER*	5:108210304:A:G	rs6889995	5	108210304	A	G	5:108211751:A:C	rs6594342	5	108211751	A	C	1	E001,7_Enh;E014,7_Enh;E015,7_Enh;E023,7_Enh;E025,7_Enh		E059
52	previously not reported	FER*	5:108210304:A:G	rs6889995	5	108210304	A	G	5:108219323:D:I	rs67264931	5	108219323	I	A	0.994213	E026,7_Enh;E087,7_Enh
52	previously not reported	FER*	5:108210304:A:G	rs6889995	5	108210304	A	G	5:108220116:A:G	rs9326752	5	108220116	A	G	0.994213	E025,7_Enh;E026,7_Enh;E053,7_Enh;E087,7_Enh;E122,7_Enh		E122
52	previously not reported	FER*	5:108210304:A:G	rs6889995	5	108210304	A	G	5:108220340:C:G	rs61170909	5	108220340	C	G	0.994213	E016,7_Enh;E023,1_TssA;E025,2_TssAFlnk;E026,7_Enh;E053,7_Enh;E054,7_Enh;E061,7_Enh;E087,7_Enh;E122,7_Enh;E125,7_Enh;E129,2_TssAFlnk		E122
52	previously not reported	FER*	5:108210304:A:G	rs6889995	5	108210304	A	G	5:108220732:C:G	rs62360793	5	108220732	G	C	0.994213	E004,7_Enh;E012,7_Enh;E015,7_Enh;E018,7_Enh;E023,1_TssA;E025,1_TssA;E026,7_Enh;E053,7_Enh;E054,7_Enh;E061,7_Enh;E080,7_Enh;E087,7_Enh;E088,7_Enh;E122,7_Enh;E125,7_Enh;E128,7_Enh;E129,2_TssAFlnk		E004;E006;E080;E083;E088;E089;E090;E100;E121;E122;E125;E128	E083
53	previously not reported	STARD4	5:111046342:C:T	rs67968533	5	111046342	T	C	5:111038874:A:G	rs56130093	5	111038874	A	G	0.804411	E035,7_Enh;E036,7_Enh;E050,7_Enh;E051,7_Enh;E093,7_Enh;E112,7_Enh;E115,7_Enh;E116,7_Enh
53	previously not reported	STARD4	5:111046342:C:T	rs67968533	5	111046342	T	C	5:111040973:A:G	rs17133665	5	111040973	A	G	0.883447	E011,7_Enh;E031,7_Enh;E032,7_Enh;E046,7_Enh;E050,7_Enh;E051,7_Enh;E093,2_TssAFlnk;E112,7_Enh;E115,3_TxFlnk		E004
53	previously not reported	STARD4	5:111046342:C:T	rs67968533	5	111046342	T	C	5:111056726:A:C	rs17842609	5	111056726	C	A	0.892649	E001,7_Enh;E002,7_Enh;E003,7_Enh;E004,7_Enh;E008,7_Enh;E009,7_Enh;E010,7_Enh;E011,7_Enh;E014,7_Enh;E015,7_Enh;E016,7_Enh;E018,7_Enh;E019,7_Enh;E020,7_Enh;E024,7_Enh;E030,7_Enh;E053,7_Enh;E054,7_Enh;E083,7_Enh	E083,7_Enh	E051
54	previously not reported	LOC101927421 - ZNF608	5:124343851:C:T	rs12654442	5	124343851	C	T	5:124341259:A:T	rs12517864	5	124341259	T	A	0.840974	E001,7_Enh;E002,7_Enh;E003,7_Enh;E009,7_Enh;E010,7_Enh;E011,7_Enh;E012,7_Enh;E014,7_Enh;E015,7_Enh;E016,7_Enh;E018,7_Enh;E019,7_Enh;E020,7_Enh;E024,7_Enh;E029,7_Enh;E031,7_Enh;E032,7_Enh;E036,7_Enh;E050,7_Enh;E051,7_Enh;E053,7_Enh;E063,1_TssA;E067,7_Enh;E068,1_TssA;E069,1_TssA;E070,7_Enh;E072,7_Enh;E074,7_Enh;E081,7_Enh;E084,7_Enh;E087,1_TssA;E088,7_Enh;E104,1_TssA;E115,7_Enh;E116,7_Enh;E124,7_Enh	E104,1_TssA	E032;E033;E050;E051;E081;E082;E086;E088;E122;E124
54	previously not reported	LOC101927421 - ZNF608	5:124343851:C:T	rs12654442	5	124343851	C	T	5:124342470:A:C	rs13171140	5	124342470	C	A	0.845254	E001,7_Enh;E004,7_Enh;E009,7_Enh;E010,7_Enh;E011,7_Enh;E012,7_Enh;E014,7_Enh;E015,7_Enh;E016,7_Enh;E018,7_Enh;E019,7_Enh;E020,7_Enh;E024,7_Enh;E031,2_TssAFlnk;E032,7_Enh;E033,7_Enh;E035,7_Enh;E036,7_Enh;E050,7_Enh;E081,7_Enh;E088,7_Enh;E093,7_Enh;E112,7_Enh;E115,7_Enh;E116,2_TssAFlnk		E032;E116
54	previously not reported	LOC101927421 - ZNF608	5:124343851:C:T	rs12654442	5	124343851	C	T	5:124343851:C:T	rs12654442	5	124343851	C	T	1	E031,7_Enh;E115,2_TssAFlnk
54	previously not reported	LOC101927421 - ZNF608	5:124343851:C:T	rs12654442	5	124343851	C	T	5:124347808:A:G	rs7442952	5	124347808	G	A	0.84137	E011,7_Enh;E027,7_Enh;E031,7_Enh;E032,7_Enh;E066,7_Enh;E083,7_Enh;E084,7_Enh;E087,7_Enh;E098,7_Enh;E110,7_Enh;E114,7_Enh;E115,7_Enh;E118,7_Enh	E083,7_Enh	E080;E083	E083
54	previously not reported	LOC101927421 - ZNF608	5:124343851:C:T	rs12654442	5	124343851	C	T	5:124347852:C:T	rs13190341	5	124347852	T	C	0.822262	E011,7_Enh;E027,7_Enh;E031,7_Enh;E032,7_Enh;E066,7_Enh;E083,7_Enh;E084,7_Enh;E087,7_Enh;E098,7_Enh;E110,7_Enh;E114,7_Enh;E115,7_Enh;E118,7_Enh	E083,7_Enh	E032;E080;E083;E089;E121	E083
54	previously not reported	LOC101927421 - ZNF608	5:124343851:C:T	rs12654442	5	124343851	C	T	5:124348767:G:T	rs4075524	5	124348767	T	G	0.835191	E008,7_Enh;E009,7_Enh;E011,7_Enh;E016,7_Enh;E019,7_Enh;E027,7_Enh;E028,7_Enh;E032,7_Enh;E058,7_Enh;E066,7_Enh;E080,7_Enh;E083,7_Enh;E084,7_Enh;E085,7_Enh;E086,7_Enh;E088,7_Enh;E098,7_Enh;E110,7_Enh;E114,2_TssAFlnk;E118,7_Enh;E119,7_Enh;E121,7_Enh;E127,2_TssAFlnk	E083,7_Enh	E057;E083;E088;E121	E083
54	previously not reported	LOC101927421 - ZNF608	5:124343851:C:T	rs12654442	5	124343851	C	T	5:124350034:A:G	rs4304077	5	124350034	G	A	0.839491	E001,7_Enh;E088,7_Enh;E115,7_Enh		E088
55	previously not reported	SLC27A6	5:128299279:C:T	rs2577531	5	128299279	T	C	5:128255275:C:T	rs2577478	5	128255275	T	C	0.850258	E083,7_Enh	E083,7_Enh
55	previously not reported	SLC27A6	5:128299279:C:T	rs2577531	5	128299279	T	C	5:128256587:D:I	rs2577479	5	128256587	D	I	0.955556	E023,7_Enh;E025,7_Enh;E049,7_Enh;E052,7_Enh;E055,7_Enh;E056,7_Enh;E057,7_Enh;E058,7_Enh;E080,7_Enh;E083,7_Enh;E117,7_Enh;E119,7_Enh;E120,7_Enh;E122,7_Enh;E127,7_Enh	E083,7_Enh	E083	E083
55	previously not reported	SLC27A6	5:128299279:C:T	rs2577531	5	128299279	T	C	5:128260961:C:T	rs2577486	5	128260961	T	C	0.850886	E083,7_Enh	E083,7_Enh
55	previously not reported	SLC27A6	5:128299279:C:T	rs2577531	5	128299279	T	C	5:128263205:A:G	rs4068750	5	128263205	A	G	0.912328	E029,7_Enh;E035,7_Enh;E036,7_Enh;E050,7_Enh;E051,2_TssAFlnk;E083,7_Enh;E122,7_Enh;E124,7_Enh	E083,7_Enh	E050
55	previously not reported	SLC27A6	5:128299279:C:T	rs2577531	5	128299279	T	C	5:128263241:C:T	rs4068751	5	128263241	C	T	0.905133	E029,7_Enh;E035,7_Enh;E036,7_Enh;E050,7_Enh;E051,2_TssAFlnk;E083,7_Enh;E122,7_Enh;E124,7_Enh	E083,7_Enh	E050
55	previously not reported	SLC27A6	5:128299279:C:T	rs2577531	5	128299279	T	C	5:128263252:A:G	rs4068752	5	128263252	A	G	0.905133	E029,7_Enh;E035,7_Enh;E036,7_Enh;E050,7_Enh;E051,2_TssAFlnk;E083,7_Enh;E122,7_Enh;E124,7_Enh	E083,7_Enh
55	previously not reported	SLC27A6	5:128299279:C:T	rs2577531	5	128299279	T	C	5:128263321:A:G	rs2526181	5	128263321	G	A	0.912328	E029,7_Enh;E035,7_Enh;E036,7_Enh;E050,7_Enh;E051,2_TssAFlnk;E083,7_Enh;E122,7_Enh;E124,7_Enh	E083,7_Enh	E050
55	previously not reported	SLC27A6	5:128299279:C:T	rs2577531	5	128299279	T	C	5:128263420:A:G	rs2526182	5	128263420	G	A	0.912328	E029,7_Enh;E030,7_Enh;E035,7_Enh;E036,7_Enh;E050,7_Enh;E051,7_Enh;E083,7_Enh;E122,7_Enh;E124,7_Enh	E083,7_Enh	E029;E050;E051;E124
55	previously not reported	SLC27A6	5:128299279:C:T	rs2577531	5	128299279	T	C	5:128263455:C:T	rs2577491	5	128263455	C	T	0.912328	E029,7_Enh;E030,7_Enh;E035,7_Enh;E036,7_Enh;E050,7_Enh;E051,7_Enh;E083,7_Enh;E122,7_Enh;E124,7_Enh	E083,7_Enh	E029;E050;E051;E117;E124
55	previously not reported	SLC27A6	5:128299279:C:T	rs2577531	5	128299279	T	C	5:128263814:C:G	rs2526183	5	128263814	G	C	0.910763	E029,7_Enh;E035,7_Enh;E036,7_Enh;E050,7_Enh;E051,2_TssAFlnk;E083,7_Enh;E124,7_Enh	E083,7_Enh
55	previously not reported	SLC27A6	5:128299279:C:T	rs2577531	5	128299279	T	C	5:128263862:C:T	rs2577493	5	128263862	C	T	0.850258	E029,7_Enh;E035,7_Enh;E036,7_Enh;E050,7_Enh;E051,2_TssAFlnk;E083,7_Enh;E124,7_Enh	E083,7_Enh
55	previously not reported	SLC27A6	5:128299279:C:T	rs2577531	5	128299279	T	C	5:128264067:D:I	rs113720787	5	128264067	D	I	0.956309	E029,7_Enh;E035,7_Enh;E036,7_Enh;E050,7_Enh;E051,7_Enh;E083,7_Enh;E124,7_Enh	E083,7_Enh
55	previously not reported	SLC27A6	5:128299279:C:T	rs2577531	5	128299279	T	C	5:128264198:C:T	rs2577494	5	128264198	C	T	0.912328	E029,7_Enh;E035,7_Enh;E036,7_Enh;E050,7_Enh;E051,7_Enh;E083,7_Enh;E124,7_Enh	E083,7_Enh
55	previously not reported	SLC27A6	5:128299279:C:T	rs2577531	5	128299279	T	C	5:128264238:C:T	rs2526184	5	128264238	T	C	0.911465	E029,7_Enh;E035,7_Enh;E036,7_Enh;E050,7_Enh;E051,7_Enh;E083,7_Enh;E124,7_Enh	E083,7_Enh
55	previously not reported	SLC27A6	5:128299279:C:T	rs2577531	5	128299279	T	C	5:128264677:A:C	rs2526185	5	128264677	C	A	0.912328	E029,7_Enh;E035,7_Enh;E036,7_Enh;E050,7_Enh;E051,7_Enh;E069,7_Enh;E083,7_Enh;E105,7_Enh;E124,7_Enh	E083,7_Enh;E105,7_Enh	E050;E123
55	previously not reported	SLC27A6	5:128299279:C:T	rs2577531	5	128299279	T	C	5:128264973:C:T	rs2577497	5	128264973	C	T	0.851021	E029,7_Enh;E036,7_Enh;E050,7_Enh;E051,7_Enh;E124,7_Enh
55	previously not reported	SLC27A6	5:128299279:C:T	rs2577531	5	128299279	T	C	5:128265120:C:G	rs2526186	5	128265120	C	G	0.912328	E036,7_Enh;E050,7_Enh;E051,7_Enh
55	previously not reported	SLC27A6	5:128299279:C:T	rs2577531	5	128299279	T	C	5:128265174:G:T	rs2577498	5	128265174	T	G	0.911558	E036,7_Enh;E050,7_Enh;E051,7_Enh
55	previously not reported	SLC27A6	5:128299279:C:T	rs2577531	5	128299279	T	C	5:128265295:C:T	rs2526187	5	128265295	C	T	0.91149	E051,7_Enh
55	previously not reported	SLC27A6	5:128299279:C:T	rs2577531	5	128299279	T	C	5:128265327:A:G	rs2526188	5	128265327	A	G	0.911532	E051,7_Enh
55	previously not reported	SLC27A6	5:128299279:C:T	rs2577531	5	128299279	T	C	5:128268831:C:T	rs12659481	5	128268831	C	T	0.911532	E080,7_Enh;E097,7_Enh		E123
55	previously not reported	SLC27A6	5:128299279:C:T	rs2577531	5	128299279	T	C	5:128269273:C:T	rs2577505	5	128269273	T	C	0.907384	E097,7_Enh
55	previously not reported	SLC27A6	5:128299279:C:T	rs2577531	5	128299279	T	C	5:128286806:D:I	rs2577394	5	128286806	D	I	0.913444	E005,7_Enh;E091,7_Enh
56	previously not reported	FGF18	5:170868622:C:T	rs78810186	5	170868622	C	T	5:170867231:G:T	rs61209923	5	170867231	G	T	0.851894	E003,7_Enh;E015,7_Enh;E019,7_Enh;E022,7_Enh;E083,7_Enh;E089,6_EnhG;E095,7_Enh;E105,7_Enh	E083,7_Enh;E095,7_Enh;E105,7_Enh
56	previously not reported	FGF18	5:170868622:C:T	rs78810186	5	170868622	C	T	5:170868622:C:T	rs78810186	5	170868622	C	T	1	E083,6_EnhG;E090,7_Enh;E095,7_Enh;E104,7_Enh;E105,7_Enh;E123,7_Enh	E083,6_EnhG;E095,7_Enh;E104,7_Enh;E105,7_Enh	E083;E123	E083
57	previously not reported	LINC01411	5:173764371:A:G	rs10035459	5	173764371	G	A	5:173764371:A:G		5	173764371	G	A	1			E004;E005;E084;E088
57	previously not reported	LINC01411	5:173764371:A:G	rs10041519	5	173764371	G	A	5:173764548:A:G		5	173764548	A	G	0.955329			E004;E005;E083;E084;E088;E117;E128	E083
57	previously not reported	LINC01411	5:173779209:A:T	rs4868384	5	173779209	A	TRUE	5:173779716:C:T	rs12513783	5	173779716	T	C	1	E005,7_Enh;E013,7_Enh;E025,7_Enh;E099,7_Enh		E128
57	previously not reported	LINC01411	5:173800675:C:T	rs185232000	5	173800675	C	T	5:173800675:C:T	rs185232000	5	173800675	C	T	1	E005,7_Enh;E013,7_Enh
57	previously not reported	LINC01411	5:173800675:C:T	rs185232000	5	173800675	C	T	5:173892033:A:G	rs141941717	5	173892033	G	A	0.83166	E005,7_Enh;E012,7_Enh;E015,7_Enh;E021,7_Enh;E074,7_Enh		E004;E022;E114
57	previously not reported	LINC01411	5:174150696:A:C	rs7447819	5	174150696	C	A	5:174150696:A:C	rs7447819	5	174150696	C	A	1	E001,10_TssBiv;E003,12_EnhBiv;E004,1_TssA;E005,2_TssAFlnk;E007,12_EnhBiv;E008,11_BivFlnk;E011,10_TssBiv;E012,12_EnhBiv;E013,1_TssA;E014,11_BivFlnk;E015,11_BivFlnk;E016,11_BivFlnk;E018,11_BivFlnk;E019,11_BivFlnk;E020,11_BivFlnk;E021,12_EnhBiv;E022,12_EnhBiv;E023,11_BivFlnk;E024,12_EnhBiv;E025,10_TssBiv;E027,2_TssAFlnk;E034,12_EnhBiv;E041,12_EnhBiv;E043,12_EnhBiv;E049,10_TssBiv;E050,12_EnhBiv;E051,…	E095,10_TssBiv;E104,1_TssA;E105,10_TssBiv	E004;E008;E091
58	previously not reported	DSP	6:7527269:A:G	rs72825038	6	7527269	G	A	6:7527269:A:G	rs72825038	6	7527269	G	A	1	E003,7_Enh;E005,7_Enh;E006,7_Enh;E007,7_Enh;E008,7_Enh;E015,7_Enh;E016,7_Enh;E022,7_Enh;E024,7_Enh;E029,12_EnhBiv;E030,11_BivFlnk;E036,7_Enh;E050,11_BivFlnk;E051,12_EnhBiv;E124,12_EnhBiv		E003;E022
58	previously not reported	DSP	6:7553063:G:T	rs75945653	6	7553063	T	G	6:7553063:G:T	rs75945653	6	7553063	T	G	1	E027,7_Enh;E028,7_Enh;E057,2_TssAFlnk;E058,2_TssAFlnk;E083,7_Enh;E118,6_EnhG;E119,2_TssAFlnk;E127,2_TssAFlnk	E083,7_Enh	E028;E127
58	previously not reported	DSP	6:7553063:G:T	rs75945653	6	7553063	T	G	6:7565727:A:T	rs17604693	6	7565727	A	T	0.844311	E087,7_Enh;E129,6_EnhG		E127
59	previously not reported	DEK	6:18227546:A:C	rs214502	6	18227546	A	C	6:18221471:G:T	rs214506	6	18221471	T	G	0.846923	E126,6_EnhG
59	previously not reported	DEK	6:18227546:A:C	rs214502	6	18227546	A	C	6:18227546:A:C	rs214502	6	18227546	A	C	1	E027,7_Enh;E049,7_Enh;E080,6_EnhG;E091,6_EnhG;E126,7_Enh		E005;E091;E123
59	previously not reported	DEK	6:18227546:A:C	rs214502	6	18227546	A	C	6:18241849:C:G	rs214509	6	18241849	G	C	0.867863	E014,6_EnhG;E016,6_EnhG;E019,6_EnhG;E023,7_Enh;E028,7_Enh;E033,6_EnhG;E039,7_Enh;E040,7_Enh;E041,6_EnhG;E042,7_Enh;E043,6_EnhG;E045,7_Enh;E049,7_Enh;E057,6_EnhG;E058,6_EnhG;E076,7_Enh;E116,6_EnhG;E118,6_EnhG;E119,7_Enh;E126,6_EnhG;E127,6_EnhG		E017;E028;E055;E056;E057;E093;E116;E118;E119;E122;E125;E126;E127;E128
59	previously not reported	DEK	6:18227546:A:C	rs214502	6	18227546	A	C	6:18254015:A:T	rs214523	6	18254015	A	T	0.977103	E006,6_EnhG;E095,6_EnhG;E104,7_Enh;E115,6_EnhG	E095,6_EnhG;E104,7_Enh
59	previously not reported	DEK	6:18227546:A:C	rs214502	6	18227546	A	C	6:18262119:C:T	rs214517	6	18262119	T	C	0.852259	E001,3_TxFlnk;E002,7_Enh;E003,3_TxFlnk;E004,7_Enh;E006,7_Enh;E007,6_EnhG;E008,2_TssAFlnk;E010,3_TxFlnk;E011,2_TssAFlnk;E012,2_TssAFlnk;E013,6_EnhG;E014,3_TxFlnk;E015,3_TxFlnk;E016,3_TxFlnk;E017,6_EnhG;E018,3_TxFlnk;E019,3_TxFlnk;E020,3_TxFlnk;E024,7_Enh;E025,7_Enh;E026,7_Enh;E027,6_EnhG;E028,6_EnhG;E029,7_Enh;E031,2_TssAFlnk;E032,7_Enh;E033,6_EnhG;E034,7_Enh;E035,7_Enh;E036,6_EnhG;E037,2_TssAFlnk…	E083,2_TssAFlnk;E095,6_EnhG;E104,7_Enh	E116
59	previously not reported	DEK	6:18227546:A:C	rs214502	6	18227546	A	C	6:18262906:C:T	rs214515	6	18262906	C	T	0.850205	E001,1_TssA;E002,1_TssA;E003,1_TssA;E004,1_TssA;E008,1_TssA;E009,3_TxFlnk;E010,3_TxFlnk;E011,1_TssA;E012,1_TssA;E013,3_TxFlnk;E014,1_TssA;E015,1_TssA;E016,1_TssA;E017,1_TssA;E018,1_TssA;E019,1_TssA;E020,3_TxFlnk;E023,1_TssA;E024,1_TssA;E025,1_TssA;E026,2_TssAFlnk;E027,2_TssAFlnk;E028,2_TssAFlnk;E029,7_Enh;E030,7_Enh;E031,7_Enh;E032,7_Enh;E033,2_TssAFlnk;E034,7_Enh;E035,7_Enh;E036,2_TssAFlnk;E037,…	E083,7_Enh;E104,1_TssA	E034;E116
59	previously not reported	DEK	6:18227546:A:C	rs214502	6	18227546	A	C	6:18267900:A:T	rs214567	6	18267900	A	T	0.972645	E107,7_Enh;E108,7_Enh;E118,12_EnhBiv;E123,7_Enh		E005;E091
59	previously not reported	DEK	6:18227546:A:C	rs214502	6	18227546	A	C	6:18276609:D:I	rs140822	6	18276609	D	I	0.966067	E009,12_EnhBiv;E014,12_EnhBiv
60	previously not reported	HDGFL1	6:22570189:C:T	rs6922960	6	22570189	T	C	6:22598259:C:T	rs7766436	6	22598259	C	T	0.822201	E088,7_Enh;E125,7_Enh;E129,7_Enh
61	previously not reported	LRRC16A	6:25351477:D:I	rs139915396	6	25351477	D	I	6:25348377:C:T	rs9986608	6	25348377	T	C	0.987493	E019,7_Enh
61	previously not reported	LRRC16A	6:25351477:D:I	rs139915396	6	25351477	D	I	6:25348399:A:G	rs9986335	6	25348399	A	G	0.987493	E019,7_Enh
61	previously not reported	LRRC16A	6:25351477:D:I	rs139915396	6	25351477	D	I	6:25349436:C:T	rs73399971	6	25349436	T	C	0.987493	E005,7_Enh;E022,7_Enh;E027,7_Enh;E059,7_Enh;E065,7_Enh		E005
61	previously not reported	LRRC16A	6:25351477:D:I	rs139915396	6	25351477	D	I	6:25351477:D:I	rs139915396	6	25351477	D	I	1	E009,7_Enh;E010,7_Enh;E041,7_Enh;E084,7_Enh;E088,7_Enh;E121,7_Enh
61	previously not reported	LRRC16A	6:25351477:D:I	rs139915396	6	25351477	D	I	6:25352637:C:T	rs11967836	6	25352637	T	C	0.994611	E033,7_Enh;E041,7_Enh;E047,7_Enh;E048,7_Enh;E050,7_Enh;E051,7_Enh;E053,7_Enh;E084,7_Enh;E085,7_Enh;E088,7_Enh;E101,7_Enh;E102,7_Enh		E084;E085;E109
61	previously not reported	LRRC16A	6:25351477:D:I	rs139915396	6	25351477	D	I	6:25355743:C:T	rs9461142	6	25355743	T	C	0.989217	E053,7_Enh;E065,7_Enh;E084,7_Enh;E085,7_Enh;E106,7_Enh
61	previously not reported	LRRC16A	6:25351477:D:I	rs139915396	6	25351477	D	I	6:25356440:C:T	rs9467475	6	25356440	T	C	0.987433	E053,7_Enh
61	previously not reported	LRRC16A	6:25351477:D:I	rs139915396	6	25351477	D	I	6:25357671:A:G	rs56930318	6	25357671	A	G	0.987433	E027,7_Enh;E028,7_Enh;E053,7_Enh;E058,7_Enh;E095,7_Enh;E119,7_Enh	E095,7_Enh
61	previously not reported	LRRC16A	6:25351477:D:I	rs139915396	6	25351477	D	I	6:25363132:A:G	rs57899991	6	25363132	A	G	0.865952	E015,7_Enh;E023,7_Enh;E026,7_Enh;E027,7_Enh;E028,7_Enh;E029,7_Enh;E049,7_Enh;E053,7_Enh;E065,7_Enh;E119,7_Enh
62	previously not reported	CDKN1A	6:36645968:C:G	rs730506	6	36645968	G	C	6:36645968:C:G	rs730506	6	36645968	G	C	1	E001,11_BivFlnk;E002,1_TssA;E003,12_EnhBiv;E005,7_Enh;E006,7_Enh;E007,2_TssAFlnk;E008,12_EnhBiv;E009,2_TssAFlnk;E010,2_TssAFlnk;E011,12_EnhBiv;E012,12_EnhBiv;E013,2_TssAFlnk;E014,12_EnhBiv;E015,2_TssAFlnk;E016,11_BivFlnk;E017,2_TssAFlnk;E018,12_EnhBiv;E019,12_EnhBiv;E020,11_BivFlnk;E021,7_Enh;E022,7_Enh;E023,2_TssAFlnk;E024,7_Enh;E025,2_TssAFlnk;E026,2_TssAFlnk;E027,2_TssAFlnk;E028,2_TssAFlnk;E02…	E083,7_Enh	E028;E032;E033;E057;E059;E083;E091;E100;E116	E083
62	previously not reported	CDKN1A	6:36645968:C:G	rs730506	6	36645968	G	C	6:36645988:C:G	rs4151702	6	36645988	G	C	0.998862	E001,11_BivFlnk;E002,1_TssA;E003,12_EnhBiv;E005,7_Enh;E006,7_Enh;E007,2_TssAFlnk;E008,12_EnhBiv;E009,2_TssAFlnk;E010,2_TssAFlnk;E011,12_EnhBiv;E012,12_EnhBiv;E013,2_TssAFlnk;E014,12_EnhBiv;E015,2_TssAFlnk;E016,11_BivFlnk;E017,2_TssAFlnk;E018,12_EnhBiv;E019,12_EnhBiv;E020,11_BivFlnk;E021,7_Enh;E022,7_Enh;E023,2_TssAFlnk;E024,7_Enh;E025,2_TssAFlnk;E026,2_TssAFlnk;E027,2_TssAFlnk;E028,2_TssAFlnk;E02…	E083,7_Enh	E028;E032;E057;E059;E080;E083;E100;E114;E117	E083
63	previously not reported	TFEB	6:41658889:C:T	rs1015149	6	41658889	C	T	6:41658112:C:G	rs9471627	6	41658112	G	C	0.80895	E006,6_EnhG;E027,6_EnhG;E055,6_EnhG;E069,6_EnhG;E071,6_EnhG;E072,6_EnhG;E074,6_EnhG;E100,7_Enh;E105,6_EnhG;E107,6_EnhG;E108,6_EnhG	E105,6_EnhG
63	previously not reported	TFEB	6:41658889:C:T	rs1015150	6	41658889	C	T	6:41659304:C:T		6	41659304	C	T	0.810914			E003;E004;E008
63	previously not reported	TFEB	6:41658889:C:T	rs1015149	6	41658889	C	T	6:41662843:C:G	rs7761800	6	41662843	G	C	0.838322	E005,7_Enh;E006,7_Enh;E017,7_Enh;E023,7_Enh;E025,7_Enh;E027,7_Enh;E032,6_EnhG;E046,7_Enh;E052,12_EnhBiv;E055,7_Enh;E056,7_Enh;E059,7_Enh;E062,7_Enh;E067,7_Enh;E068,7_Enh;E069,7_Enh;E071,7_Enh;E072,7_Enh;E073,7_Enh;E074,7_Enh;E079,6_EnhG;E084,6_EnhG;E091,7_Enh;E095,7_Enh;E100,7_Enh;E103,7_Enh;E107,7_Enh;E108,7_Enh;E113,6_EnhG;E121,7_Enh;E125,7_Enh;E129,7_Enh	E095,7_Enh	E055;E056;E088;E091;E100;E121;E123;E126;E128
63	previously not reported	TFEB	6:41658889:C:T	rs1015149	6	41658889	C	T	6:41662890:C:G	rs7775136	6	41662890	C	G	0.820899	E005,7_Enh;E006,7_Enh;E017,7_Enh;E023,7_Enh;E025,7_Enh;E027,7_Enh;E032,6_EnhG;E046,7_Enh;E052,12_EnhBiv;E055,7_Enh;E056,7_Enh;E059,7_Enh;E062,7_Enh;E067,7_Enh;E068,7_Enh;E069,7_Enh;E071,7_Enh;E072,7_Enh;E073,7_Enh;E074,7_Enh;E079,6_EnhG;E084,6_EnhG;E091,7_Enh;E095,7_Enh;E100,7_Enh;E103,7_Enh;E107,7_Enh;E108,7_Enh;E113,6_EnhG;E121,7_Enh;E125,7_Enh;E129,7_Enh	E095,7_Enh
64	previously not reported	RCAN2	6:46452619:C:T	rs871728	6	46452619	C	T	6:46440898:A:T	rs12199788	6	46440898	A	T	0.886286	E025,7_Enh;E052,7_Enh;E129,7_Enh
64	previously not reported	RCAN2	6:46452619:C:T	rs871728	6	46452619	C	T	6:46446047:A:T	rs7747957	6	46446047	T	A	0.916725	E004,7_Enh;E065,7_Enh
64	previously not reported	RCAN2	6:46452619:C:T	rs871728	6	46452619	C	T	6:46446357:C:T	rs17216694	6	46446357	C	T	0.920338	E004,7_Enh;E065,7_Enh
64	previously not reported	RCAN2	6:46452619:C:T	rs871728	6	46452619	C	T	6:46449737:D:I	rs34480019	6	46449737	D	I	0.918074	E011,7_Enh;E083,7_Enh	E083,7_Enh
64	previously not reported	RCAN2	6:46452619:C:T	rs871728	6	46452619	C	T	6:46452619:C:T	rs871728	6	46452619	C	T	1	E004,7_Enh;E011,7_Enh;E015,7_Enh;E016,7_Enh;E065,7_Enh;E067,7_Enh;E068,7_Enh;E069,7_Enh;E071,7_Enh;E074,7_Enh;E083,2_TssAFlnk;E087,7_Enh;E104,7_Enh;E107,7_Enh	E083,2_TssAFlnk;E104,7_Enh	E004;E083	E083
64	previously not reported	RCAN2	6:46452619:C:T	rs871728	6	46452619	C	T	6:46452830:A:G	rs947136	6	46452830	G	A	0.90465	E011,7_Enh;E068,7_Enh;E071,7_Enh;E074,7_Enh;E083,7_Enh;E087,7_Enh;E104,7_Enh	E083,7_Enh;E104,7_Enh
64	previously not reported	RCAN2	6:46452619:C:T	rs871728	6	46452619	C	T	6:46456536:C:T	rs9349362	6	46456536	C	T	0.91454	E024,7_Enh;E065,1_TssA;E083,7_Enh;E087,7_Enh;E107,7_Enh;E108,1_TssA	E083,7_Enh	E083	E083
64	previously not reported	RCAN2	6:46452619:C:T	rs871728	6	46452619	C	T	6:46459395:A:C	rs12214172	6	46459395	A	C	0.887204	E001,1_TssA;E002,10_TssBiv;E003,1_TssA;E004,1_TssA;E005,1_TssA;E006,1_TssA;E007,1_TssA;E008,1_TssA;E009,10_TssBiv;E010,10_TssBiv;E011,1_TssA;E012,10_TssBiv;E013,1_TssA;E014,1_TssA;E015,1_TssA;E016,1_TssA;E017,10_TssBiv;E018,1_TssA;E019,1_TssA;E020,1_TssA;E021,1_TssA;E022,1_TssA;E023,1_TssA;E024,1_TssA;E025,1_TssA;E026,1_TssA;E027,1_TssA;E028,10_TssBiv;E029,11_BivFlnk;E030,12_EnhBiv;E031,1_TssA;E0…	E083,1_TssA;E095,1_TssA;E104,1_TssA;E105,1_TssA	E003;E004;E007;E008;E021;E050;E059;E083;E088;E089;E092;E109;E118	E083
64	previously not reported	RCAN2	6:46452619:C:T	rs871728	6	46452619	C	T	6:46460147:A:T	rs9381458	6	46460147	T	A	0.957559	E001,11_BivFlnk;E002,10_TssBiv;E003,2_TssAFlnk;E004,2_TssAFlnk;E007,7_Enh;E008,1_TssA;E011,10_TssBiv;E014,11_BivFlnk;E015,11_BivFlnk;E016,10_TssBiv;E018,11_BivFlnk;E019,11_BivFlnk;E020,11_BivFlnk;E023,2_TssAFlnk;E024,1_TssA;E025,2_TssAFlnk;E026,10_TssBiv;E027,1_TssA;E035,10_TssBiv;E049,11_BivFlnk;E051,11_BivFlnk;E052,11_BivFlnk;E055,2_TssAFlnk;E056,1_TssA;E058,12_EnhBiv;E063,11_BivFlnk;E065,1_Tss…	E083,2_TssAFlnk;E095,1_TssA;E104,1_TssA;E105,1_TssA	E120
64	previously not reported	RCAN2	6:46452619:C:T	rs871728	6	46452619	C	T	6:46461236:C:T	rs7762445	6	46461236	T	C	0.866015	E087,7_Enh
64	previously not reported	RCAN2	6:46452619:C:T	rs871728	6	46452619	C	T	6:46468726:D:I	rs139696716	6	46468726	I	A	0.841316	E097,7_Enh;E100,7_Enh
64	previously not reported	RCAN2	6:46452619:C:T	rs871728	6	46452619	C	T	6:46469769:D:I	rs5875968	6	46469769	I	T	0.84192	E023,7_Enh;E052,7_Enh;E055,7_Enh;E108,7_Enh;E129,7_Enh		E055;E120
64	previously not reported	RCAN2	6:46452619:C:T	rs871728	6	46452619	C	T	6:46470309:A:T	rs9369622	6	46470309	T	A	0.855137	E023,7_Enh;E025,7_Enh;E049,7_Enh;E052,7_Enh;E055,7_Enh;E069,7_Enh;E097,7_Enh;E100,7_Enh;E107,7_Enh;E108,7_Enh;E111,7_Enh
64	previously not reported	RCAN2	6:46452619:C:T	rs871728	6	46452619	C	T	6:46473024:A:G	rs4714941	6	46473024	G	A	0.896121	E061,7_Enh;E074,7_Enh;E083,7_Enh;E107,7_Enh;E108,7_Enh	E083,7_Enh
64	previously not reported	RCAN2	6:46452619:C:T	rs871728	6	46452619	C	T	6:46475421:A:G	rs9395196	6	46475421	G	A	0.898374	E066,7_Enh;E077,7_Enh;E087,7_Enh;E102,7_Enh;E107,7_Enh;E110,7_Enh		E094;E098;E109
64	previously not reported	RCAN2	6:46452619:C:T	rs871728	6	46452619	C	T	6:46475884:C:T	rs1538995	6	46475884	C	T	0.898374	E006,7_Enh;E066,7_Enh;E087,7_Enh;E094,7_Enh;E095,7_Enh;E098,7_Enh;E100,7_Enh;E102,7_Enh;E104,7_Enh;E105,7_Enh;E106,7_Enh;E107,7_Enh;E108,7_Enh;E110,7_Enh	E095,7_Enh;E104,7_Enh;E105,7_Enh
64	previously not reported	RCAN2	6:46452619:C:T	rs871728	6	46452619	C	T	6:46477337:C:T	rs1881031	6	46477337	C	T	0.851599	E066,7_Enh;E068,7_Enh;E072,7_Enh;E074,7_Enh;E083,7_Enh;E095,7_Enh;E104,7_Enh;E107,7_Enh;E108,7_Enh;E110,7_Enh	E083,7_Enh;E095,7_Enh;E104,7_Enh
64	previously not reported	RCAN2	6:46452619:C:T	rs871728	6	46452619	C	T	6:46478934:A:G	rs2178050	6	46478934	G	A	0.846311	E023,7_Enh;E025,7_Enh;E026,7_Enh;E027,7_Enh;E049,7_Enh;E052,7_Enh;E055,7_Enh;E059,7_Enh;E061,7_Enh;E063,7_Enh;E065,7_Enh;E066,7_Enh;E067,7_Enh;E068,7_Enh;E069,7_Enh;E071,7_Enh;E072,7_Enh;E073,7_Enh;E074,7_Enh;E076,7_Enh;E077,7_Enh;E080,7_Enh;E083,7_Enh;E088,7_Enh;E092,7_Enh;E095,7_Enh;E097,7_Enh;E101,7_Enh;E105,7_Enh;E107,7_Enh;E108,7_Enh;E111,7_Enh;E120,7_Enh;E121,7_Enh;E126,7_Enh;E128,7_Enh;E12…	E083,7_Enh;E095,7_Enh;E105,7_Enh
64	previously not reported	RCAN2	6:46452619:C:T	rs871728	6	46452619	C	T	6:46485635:G:T	rs9357509	6	46485635	G	T	0.837018	E097,7_Enh
65	previously not reported	LOC101927686	6:113978255:C:T	rs111739590	6	113978255	C	T	6:113976471:D:I	rs148424867	6	113976471	D	I	0.969659	E026,7_Enh;E027,7_Enh;E049,7_Enh;E052,7_Enh;E057,7_Enh;E058,7_Enh;E114,7_Enh;E122,7_Enh;E127,7_Enh;E129,7_Enh		E119
65	previously not reported	LOC101927686	6:113978255:C:T	rs111739590	6	113978255	C	T	6:113977306:A:G	rs12201635	6	113977306	A	G	0.905176	E027,7_Enh;E053,7_Enh;E057,7_Enh;E058,7_Enh;E119,7_Enh;E127,7_Enh		E081;E119
65	previously not reported	LOC101927686	6:113978255:C:T	rs111739590	6	113978255	C	T	6:113982241:C:T	rs60286805	6	113982241	C	T	0.829155	E027,7_Enh;E029,7_Enh;E030,7_Enh;E031,7_Enh;E084,7_Enh;E085,7_Enh;E091,7_Enh;E110,7_Enh;E116,7_Enh;E118,7_Enh;E124,7_Enh		E084;E085;E109
65	previously not reported	LOC101927686	6:113978255:C:T	rs111739590	6	113978255	C	T	6:113984567:A:T	rs12205015	6	113984567	A	T	0.830588	E031,7_Enh;E032,7_Enh;E077,7_Enh;E080,7_Enh;E109,7_Enh;E116,2_TssAFlnk;E118,7_Enh
66	previously not reported	TCF21	6:134214525:C:G	rs12190287	6	134214525	C	G	6:134214525:C:G	rs12190287	6	134214525	C	G	1	E005,12_EnhBiv;E006,12_EnhBiv;E008,11_BivFlnk;E014,12_EnhBiv;E015,11_BivFlnk;E017,3_TxFlnk;E018,11_BivFlnk;E019,11_BivFlnk;E021,12_EnhBiv;E022,11_BivFlnk;E024,12_EnhBiv;E032,12_EnhBiv;E034,12_EnhBiv;E038,12_EnhBiv;E040,12_EnhBiv;E059,12_EnhBiv;E075,10_TssBiv;E076,10_TssBiv;E077,10_TssBiv;E078,10_TssBiv;E080,12_EnhBiv;E081,10_TssBiv;E084,10_TssBiv;E085,11_BivFlnk;E086,10_TssBiv;E088,10_TssBiv;E090…	E095,12_EnhBiv;E104,1_TssA;E105,7_Enh	E004;E006;E007;E021;E084;E088;E097
67	previously not reported	RP1-155D22.1	6:164532059:A:T	rs206708	6	164532059	T	A	6:164526945:D:I	rs206700	6	164526945	D	I	0.925605	E068,1_TssA;E083,2_TssAFlnk;E090,7_Enh;E095,1_TssA;E105,1_TssA;E123,1_TssA	E083,2_TssAFlnk;E095,1_TssA;E105,1_TssA	E083;E123	E083
67	previously not reported	RP1-155D22.1	6:164532059:A:T	rs206708	6	164532059	T	A	6:164528867:A:T	rs206705	6	164528867	A	T	0.950246	E013,7_Enh;E049,7_Enh;E052,7_Enh;E057,7_Enh;E058,7_Enh;E079,7_Enh;E083,7_Enh;E089,7_Enh;E090,7_Enh;E100,7_Enh;E107,7_Enh;E108,7_Enh;E120,7_Enh;E121,7_Enh;E123,7_Enh	E083,7_Enh	E004;E051;E083;E089;E090;E100;E120;E121;E125;E128	E083
67	previously not reported	RP1-155D22.1	6:164532059:A:T	rs206708	6	164532059	T	A	6:164531522:A:T	rs206707	6	164531522	T	A	0.998965	E027,7_Enh;E083,7_Enh;E090,7_Enh;E095,7_Enh;E096,7_Enh;E107,2_TssAFlnk;E108,7_Enh	E083,7_Enh;E095,7_Enh	E100
67	previously not reported	RP1-155D22.1	6:164532059:A:T	rs206708	6	164532059	T	A	6:164531794:D:I	rs169580	6	164531794	D	I	0.987104	E090,7_Enh;E095,7_Enh;E096,7_Enh;E100,7_Enh;E107,2_TssAFlnk;E108,7_Enh	E095,7_Enh	E088
67	previously not reported	RP1-155D22.1	6:164532059:A:T	rs206708	6	164532059	T	A	6:164533028:C:T	rs206710	6	164533028	T	C	0.984734	E089,7_Enh;E090,7_Enh		E083	E083
68	previously not reported	GET4	7:925949:A:G	rs10267796	7	925949	A	G	7:926077:A:G		7	926077	G	A	0.838802			E034
69	previously not reported	DGKB	7:14372009:A:G	rs55734480	7	14372009	G	A	7:14368977:A:G	rs13233548	7	14368977	A	G	0.814031	E009,7_Enh;E010,7_Enh;E053,7_Enh
69	previously not reported	DGKB	7:14372009:A:G	rs55734480	7	14372009	G	A	7:14372009:A:G	rs55734480	7	14372009	G	A	1	E014,7_Enh		E004;E008;E021;E022;E055;E056;E057;E083;E094;E098;E121;E125;E126;E128	E083
69	previously not reported	DGKB	7:14372009:A:G	rs12154315	7	14372009	G	A	7:14373714:C:T		7	14373714	C	T	0.983574			E124
69	previously not reported	DGKB	7:14453835:A:G	rs56352403	7	14453835	G	A	7:14453835:A:G	rs56352403	7	14453835	G	A	1	E011,7_Enh;E083,7_Enh	E083,7_Enh	E083	E083
69	previously not reported	DGKB	7:14453835:A:G	rs56352403	7	14453835	G	A	7:14454355:A:G	rs11761424	7	14454355	G	A	0.995821	E083,7_Enh	E083,7_Enh	E004;E083;E088	E083
69	previously not reported	DGKB	7:14453835:A:G	rs2116531	7	14453835	G	A	7:14454607:C:T		7	14454607	T	C	0.996656			E083	E083
69	previously not reported	DGKB	7:14453835:A:G	rs35469417	7	14453835	G	A	7:14456120:C:T		7	14456120	C	T	0.837759			E083	E083
69	previously not reported	DGKB	7:14453835:A:G	rs34886902	7	14453835	G	A	7:14456158:C:T		7	14456158	C	T	0.835102			E083	E083
69	previously not reported	DGKB	7:14453835:A:G	rs13233368	7	14453835	G	A	7:14456583:C:T		7	14456583	C	T	0.837759			E021;E083	E083
69	previously not reported	DGKB	7:14453835:A:G	rs73068026	7	14453835	G	A	7:14457610:A:G		7	14457610	A	G	0.837434			E083	E083
69	previously not reported	DGKB	7:14453835:A:G	rs56352403	7	14453835	G	A	7:14459826:A:T	rs13232324	7	14459826	T	A	0.828015	E053,7_Enh;E085,7_Enh		E088
69	previously not reported	DGKB	7:14453835:A:G	rs56352403	7	14453835	G	A	7:14460337:G:T	rs12535778	7	14460337	G	T	0.82816	E019,7_Enh;E053,7_Enh;E085,7_Enh;E088,7_Enh		E080
69	previously not reported	DGKB	7:14453835:A:G	rs56352403	7	14453835	G	A	7:14465110:A:G	rs1367777	7	14465110	A	G	0.804658	E011,7_Enh
70	previously not reported	PRPS1L1	7:18040476:A:C	rs4721679	7	18040476	A	C	7:18039252:C:T		7	18039252	T	C	0.845743			E123
70	previously not reported	PRPS1L1	7:18040476:A:C	rs6961768	7	18040476	A	C	7:18040129:C:T	rs58338223	7	18040129	C	T	0.984016	E091,1_TssA;E123,1_TssA
70	previously not reported	PRPS1L1	7:18040476:A:C	rs6961768	7	18040476	A	C	7:18040201:A:G	rs59309544	7	18040201	G	A	0.976582	E091,1_TssA;E123,1_TssA		E123
70	previously not reported	PRPS1L1	7:18040476:A:C	rs6961768	7	18040476	A	C	7:18040239:G:T	rs12699947	7	18040239	G	T	0.980185	E091,1_TssA;E123,1_TssA		E123
70	previously not reported	PRPS1L1	7:18040476:A:C	rs6961768	7	18040476	A	C	7:18040264:C:T	rs6957876	7	18040264	C	T	0.984039	E091,1_TssA;E123,1_TssA		E123
70	previously not reported	PRPS1L1	7:18040476:A:C	rs6961768	7	18040476	A	C	7:18040476:A:C	rs6961768	7	18040476	A	C	1	E091,1_TssA;E123,1_TssA		E123
71	previously not reported	DNAH11	7:21622494:C:T	rs62441680	7	21622494	T	C	7:21617089:G:T	rs7803297	7	21617089	G	T	0.924922	E006,7_Enh;E029,7_Enh;E124,7_Enh		E059
71	previously not reported	DNAH11	7:21622494:C:T	rs62441680	7	21622494	T	C	7:21619733:C:T	rs56106069	7	21619733	C	T	0.929539	E025,7_Enh;E027,7_Enh;E028,7_Enh;E029,7_Enh;E036,7_Enh;E057,7_Enh;E058,7_Enh;E061,7_Enh;E066,7_Enh;E080,7_Enh;E083,7_Enh;E107,7_Enh;E108,7_Enh;E116,7_Enh;E119,7_Enh;E121,7_Enh;E122,7_Enh;E124,2_TssAFlnk;E125,7_Enh;E127,7_Enh	E083,7_Enh	E006;E017;E028;E055;E057;E059;E083;E093;E098;E116;E119;E122;E125;E126	E083
71	previously not reported	DNAH11	7:21622494:C:T	rs62441680	7	21622494	T	C	7:21626856:A:G	rs11765753	7	21626856	A	G	0.800822	E036,7_Enh;E037,7_Enh;E041,7_Enh;E042,7_Enh;E043,7_Enh;E047,7_Enh;E083,7_Enh;E098,7_Enh	E083,7_Enh	E003;E004;E021;E083	E083
71	previously not reported	DNAH11	7:21622494:C:T	rs62441680	7	21622494	T	C	7:21628197:A:G	rs12670130	7	21628197	A	G	0.927814	E033,7_Enh;E039,7_Enh;E043,7_Enh;E047,7_Enh
71	previously not reported	DNAH11	7:21622494:C:T	rs62441680	7	21622494	T	C	7:21631753:C:T	rs62441720	7	21631753	C	T	0.912676	E012,7_Enh
71	previously not reported	DNAH11	7:21622494:C:T	rs62441680	7	21622494	T	C	7:21635205:A:T	rs11768411	7	21635205	A	T	0.907932	E059,7_Enh;E061,7_Enh
71	previously not reported	DNAH11	7:21622494:C:T	rs62441680	7	21622494	T	C	7:21635819:A:G	rs7809703	7	21635819	G	A	0.939944	E059,7_Enh;E061,7_Enh		E059
72	previously not reported	ELMO1	7:37398113:C:G	rs4720244	7	37398113	C	G	7:37398113:C:G	rs4720244	7	37398113	C	G	1	E004,7_Enh;E005,7_Enh;E011,7_Enh;E013,7_Enh;E035,7_Enh;E036,7_Enh;E041,7_Enh;E042,7_Enh;E043,7_Enh;E050,7_Enh;E051,7_Enh;E067,7_Enh;E068,7_Enh;E069,7_Enh;E071,7_Enh;E072,7_Enh;E074,7_Enh;E083,7_Enh;E123,7_Enh	E083,7_Enh
73	previously not reported	SEMA3A	7:83998676:C:T	rs62472627	7	83998676	T	C	7:83998676:C:T	rs62472627	7	83998676	T	C	1	E061,7_Enh		E059
74	previously not reported	CHRM2	7:136569416:C:T	rs1424569	7	136569416	T	C	7:136569416:C:T	rs1424569	7	136569416	T	C	1	E017,6_EnhG;E076,7_Enh;E083,2_TssAFlnk;E111,7_Enh	E083,2_TssAFlnk	E004;E006;E083;E088;E120;E121	E083
75	previously not reported	DLC1	8:13130478:C:T	rs1188285	8	13130478	C	T	8:13109861:C:T	rs970562	8	13109861	C	T	0.800207	E026,7_Enh;E052,7_Enh;E055,7_Enh;E066,7_Enh;E080,7_Enh;E083,7_Enh;E086,7_Enh;E092,7_Enh;E122,7_Enh;E125,7_Enh	E083,7_Enh
75	previously not reported	DLC1	8:13130478:C:T	rs1188285	8	13130478	C	T	8:13110302:C:G	rs1188269	8	13110302	C	G	0.802256	E023,7_Enh;E025,7_Enh;E026,7_Enh;E052,7_Enh;E055,7_Enh;E066,7_Enh;E080,7_Enh;E083,7_Enh;E086,7_Enh;E088,7_Enh;E092,7_Enh;E103,7_Enh;E122,7_Enh;E125,7_Enh;E126,7_Enh	E083,7_Enh	E006;E080;E083;E084;E086;E088;E089;E090;E122	E083
75	previously not reported	DLC1	8:13130478:C:T	rs1188285	8	13130478	C	T	8:13112475:D:I	rs33978356	8	13112475	D	I	0.816973	E023,7_Enh;E025,7_Enh;E026,7_Enh;E052,7_Enh;E055,7_Enh;E080,7_Enh;E083,7_Enh;E120,7_Enh;E122,7_Enh;E125,7_Enh;E126,7_Enh;E128,7_Enh;E129,7_Enh	E083,7_Enh
75	previously not reported	DLC1	8:13130478:C:T	rs1188285	8	13130478	C	T	8:13116272:G:T	rs1188296	8	13116272	G	T	0.834862	E013,7_Enh;E026,7_Enh;E052,7_Enh;E055,7_Enh;E080,7_Enh;E083,7_Enh;E085,7_Enh;E118,7_Enh;E122,7_Enh;E125,7_Enh;E126,7_Enh;E129,6_EnhG	E083,7_Enh
75	previously not reported	DLC1	8:13130478:C:T	rs1188285	8	13130478	C	T	8:13116615:C:T	rs1188297	8	13116615	C	T	0.835221	E026,7_Enh;E052,7_Enh;E055,7_Enh;E080,7_Enh;E083,7_Enh;E122,7_Enh;E129,6_EnhG	E083,7_Enh
75	previously not reported	DLC1	8:13130478:C:T	rs1188285	8	13130478	C	T	8:13125822:C:T	rs1188278	8	13125822	T	C	0.962225	E006,7_Enh;E017,6_EnhG;E026,7_Enh;E052,7_Enh;E055,7_Enh;E056,6_EnhG;E057,7_Enh;E080,7_Enh;E083,7_Enh;E118,7_Enh;E122,7_Enh;E125,7_Enh;E126,7_Enh;E129,6_EnhG	E083,7_Enh
75	previously not reported	DLC1	8:13130478:C:T	rs1188285	8	13130478	C	T	8:13126621:A:T	rs1209991	8	13126621	A	T	0.942998	E006,7_Enh;E017,6_EnhG;E052,6_EnhG;E055,6_EnhG;E056,6_EnhG;E080,6_EnhG;E083,7_Enh;E118,7_Enh;E122,6_EnhG;E125,6_EnhG;E129,6_EnhG	E083,7_Enh
75	previously not reported	DLC1	8:13130478:C:T	rs1188285	8	13130478	C	T	8:13128100:A:G	rs884058	8	13128100	A	G	0.850887	E005,7_Enh;E006,7_Enh;E013,7_Enh;E017,7_Enh;E023,7_Enh;E025,7_Enh;E026,7_Enh;E028,7_Enh;E049,7_Enh;E052,7_Enh;E055,7_Enh;E056,6_EnhG;E057,7_Enh;E058,7_Enh;E063,7_Enh;E065,7_Enh;E066,7_Enh;E076,7_Enh;E078,7_Enh;E080,7_Enh;E083,2_TssAFlnk;E088,7_Enh;E091,7_Enh;E092,7_Enh;E095,7_Enh;E097,7_Enh;E099,7_Enh;E102,7_Enh;E103,7_Enh;E104,7_Enh;E111,7_Enh;E114,7_Enh;E118,7_Enh;E119,7_Enh;E120,7_Enh;E121,2_T…	E083,2_TssAFlnk;E095,7_Enh;E104,7_Enh	E006;E017;E057;E080;E083;E086;E088;E091;E122;E127	E083
75	previously not reported	DLC1	8:13130478:C:T	rs1188285	8	13130478	C	T	8:13128224:A:G	rs884059	8	13128224	A	G	0.96564	E005,7_Enh;E006,7_Enh;E013,7_Enh;E017,7_Enh;E023,7_Enh;E025,7_Enh;E026,7_Enh;E028,7_Enh;E049,7_Enh;E052,7_Enh;E055,7_Enh;E056,6_EnhG;E057,7_Enh;E058,7_Enh;E063,7_Enh;E065,7_Enh;E066,7_Enh;E076,7_Enh;E078,7_Enh;E080,7_Enh;E083,2_TssAFlnk;E088,7_Enh;E091,7_Enh;E092,7_Enh;E095,7_Enh;E097,7_Enh;E099,7_Enh;E103,7_Enh;E104,7_Enh;E105,7_Enh;E110,7_Enh;E111,7_Enh;E114,7_Enh;E118,7_Enh;E119,7_Enh;E120,7_E…	E083,2_TssAFlnk;E095,7_Enh;E104,7_Enh;E105,7_Enh	E004;E005;E057;E083;E088;E122	E083
75	previously not reported	DLC1	8:13130478:C:T	rs1188285	8	13130478	C	T	8:13130478:C:T	rs1188285	8	13130478	C	T	1	E006,7_Enh;E017,7_Enh;E026,7_Enh;E052,7_Enh;E055,7_Enh;E056,7_Enh;E066,7_Enh;E080,7_Enh;E083,7_Enh;E114,7_Enh;E118,7_Enh;E122,2_TssAFlnk;E125,7_Enh;E126,7_Enh;E128,7_Enh;E129,7_Enh	E083,7_Enh
75	previously not reported	DLC1	8:13130478:C:T	rs1188285	8	13130478	C	T	8:13132137:A:G	rs1188283	8	13132137	A	G	0.9895	E017,1_TssA;E023,2_TssAFlnk;E025,1_TssA;E026,1_TssA;E049,7_Enh;E052,1_TssA;E055,1_TssA;E056,1_TssA;E063,7_Enh;E066,2_TssAFlnk;E068,1_TssA;E071,7_Enh;E076,7_Enh;E078,7_Enh;E080,1_TssA;E083,2_TssAFlnk;E084,7_Enh;E085,7_Enh;E088,7_Enh;E111,7_Enh;E114,1_TssA;E118,1_TssA;E120,1_TssA;E121,1_TssA;E122,1_TssA;E125,2_TssAFlnk;E126,1_TssA;E128,1_TssA;E129,2_TssAFlnk	E083,2_TssAFlnk	E090;E092;E118;E122
75	previously not reported	DLC1	8:13130478:C:T	rs1188285	8	13130478	C	T	8:13132322:D:I	rs2307746	8	13132322	I	T	0.988067	E017,1_TssA;E023,1_TssA;E025,1_TssA;E026,2_TssAFlnk;E049,7_Enh;E052,1_TssA;E055,1_TssA;E056,1_TssA;E063,7_Enh;E066,1_TssA;E068,1_TssA;E076,7_Enh;E080,1_TssA;E083,1_TssA;E084,7_Enh;E085,7_Enh;E088,7_Enh;E111,7_Enh;E114,1_TssA;E118,1_TssA;E120,1_TssA;E121,1_TssA;E122,1_TssA;E125,1_TssA;E126,1_TssA;E128,1_TssA;E129,1_TssA	E083,1_TssA	E006;E122
75	previously not reported	DLC1	8:13130478:C:T	rs1188285	8	13130478	C	T	8:13132534:C:G	rs1188282	8	13132534	C	G	0.9853	E017,1_TssA;E023,1_TssA;E025,1_TssA;E026,1_TssA;E049,2_TssAFlnk;E052,1_TssA;E055,1_TssA;E056,1_TssA;E058,7_Enh;E063,2_TssAFlnk;E066,1_TssA;E068,1_TssA;E076,7_Enh;E077,1_TssA;E078,1_TssA;E080,1_TssA;E083,1_TssA;E084,7_Enh;E085,7_Enh;E087,7_Enh;E088,2_TssAFlnk;E103,7_Enh;E108,7_Enh;E111,2_TssAFlnk;E114,1_TssA;E118,1_TssA;E120,1_TssA;E121,1_TssA;E122,1_TssA;E125,1_TssA;E126,1_TssA;E128,1_TssA;E129,1…	E083,1_TssA	E083;E092;E118;E122	E083
75	previously not reported	DLC1	8:13145524:A:T	rs118045325	8	13145524	A	T	8:13145524:A:T	rs118045325	8	13145524	A	T	1	E007,7_Enh;E023,7_Enh;E025,7_Enh		E089
75	previously not reported	DLC1	8:13145524:A:T	rs118045325	8	13145524	A	T	8:13172329:C:T	rs190497091	8	13172329	C	T	0.918254	E083,7_Enh	E083,7_Enh	E082;E083;E119	E083
75	previously not reported	DLC1	8:13369061:A:G	rs17222010	8	13369061	A	G	8:13369061:A:G	rs17222010	8	13369061	A	G	1	E023,2_TssAFlnk;E025,2_TssAFlnk;E026,7_Enh;E049,2_TssAFlnk;E055,7_Enh;E063,2_TssAFlnk;E065,1_TssA;E078,1_TssA;E083,2_TssAFlnk;E086,1_TssA;E088,2_TssAFlnk;E089,1_TssA;E090,1_TssA;E097,1_TssA;E104,1_TssA;E105,1_TssA;E111,1_TssA;E122,7_Enh;E126,7_Enh;E128,2_TssAFlnk;E129,7_Enh	E083,2_TssAFlnk;E104,1_TssA;E105,1_TssA	E083;E088;E089;E090;E097;E122	E083
76	previously not reported	MTUS1	8:17550623:A:G	rs4921804	8	17550623	G	A	8:17549552:A:T	rs6995151	8	17549552	T	A	0.949481	E027,1_TssA;E028,1_TssA;E057,2_TssAFlnk;E058,1_TssA;E061,7_Enh;E063,7_Enh;E067,1_TssA;E068,1_TssA;E069,7_Enh;E070,7_Enh;E071,3_TxFlnk;E072,7_Enh;E073,7_Enh;E074,2_TssAFlnk;E078,1_TssA;E081,7_Enh;E083,7_Enh;E090,7_Enh;E107,7_Enh;E108,7_Enh;E119,1_TssA;E122,2_TssAFlnk;E127,2_TssAFlnk	E083,7_Enh	E057;E083;E122	E083
76	previously not reported	MTUS1	8:17550623:A:G	rs4921804	8	17550623	G	A	8:17549923:G:T	rs12544256	8	17549923	G	T	0.962716	E027,1_TssA;E028,1_TssA;E057,1_TssA;E058,2_TssAFlnk;E061,7_Enh;E063,1_TssA;E067,1_TssA;E068,1_TssA;E069,1_TssA;E070,7_Enh;E071,2_TssAFlnk;E072,2_TssAFlnk;E073,2_TssAFlnk;E074,2_TssAFlnk;E081,7_Enh;E083,7_Enh;E094,7_Enh;E095,3_TxFlnk;E100,7_Enh;E104,7_Enh;E107,2_TssAFlnk;E108,2_TssAFlnk;E119,1_TssA;E122,1_TssA;E127,2_TssAFlnk	E083,7_Enh;E095,3_TxFlnk;E104,7_Enh	E021;E028;E057;E082;E083;E091;E100;E114;E119;E122	E083
76	previously not reported	MTUS1	8:17550623:A:G	rs4921804	8	17550623	G	A	8:17550205:G:T	rs4921803	8	17550205	G	T	0.967412	E027,1_TssA;E057,1_TssA;E058,1_TssA;E061,7_Enh;E063,1_TssA;E067,1_TssA;E068,2_TssAFlnk;E069,1_TssA;E070,7_Enh;E071,1_TssA;E072,1_TssA;E073,1_TssA;E074,2_TssAFlnk;E081,12_EnhBiv;E082,7_Enh;E083,7_Enh;E087,1_TssA;E095,1_TssA;E100,7_Enh;E107,7_Enh;E108,7_Enh;E119,1_TssA;E122,1_TssA;E127,1_TssA	E083,7_Enh;E095,1_TssA	E046;E081;E082;E083;E122	E083
76	previously not reported	MTUS1	8:17550623:A:G	rs4921804	8	17550623	G	A	8:17550280:C:T	rs4921557	8	17550280	T	C	0.925217	E027,1_TssA;E057,1_TssA;E058,1_TssA;E061,7_Enh;E063,1_TssA;E067,1_TssA;E068,2_TssAFlnk;E069,1_TssA;E070,7_Enh;E071,1_TssA;E072,1_TssA;E073,1_TssA;E074,2_TssAFlnk;E081,12_EnhBiv;E082,7_Enh;E083,7_Enh;E087,1_TssA;E095,1_TssA;E100,7_Enh;E107,7_Enh;E108,7_Enh;E119,1_TssA;E122,1_TssA;E127,1_TssA	E083,7_Enh;E095,1_TssA	E122
76	previously not reported	MTUS1	8:17550623:A:G	rs4921804	8	17550623	G	A	8:17550623:A:G	rs4921804	8	17550623	G	A	1	E061,7_Enh;E063,1_TssA;E067,1_TssA;E068,2_TssAFlnk;E069,1_TssA;E071,1_TssA;E072,1_TssA;E073,1_TssA;E074,1_TssA;E083,7_Enh;E095,1_TssA;E100,7_Enh;E104,1_TssA;E107,7_Enh;E108,7_Enh;E122,2_TssAFlnk	E083,7_Enh;E095,1_TssA;E104,1_TssA	E122
76	previously not reported	MTUS1	8:17550623:A:G	rs4921804	8	17550623	G	A	8:17550643:C:T	rs4921558	8	17550643	T	C	0.997728	E061,7_Enh;E063,1_TssA;E067,1_TssA;E068,2_TssAFlnk;E069,1_TssA;E071,1_TssA;E072,1_TssA;E073,1_TssA;E074,1_TssA;E083,7_Enh;E095,1_TssA;E100,7_Enh;E104,1_TssA;E107,7_Enh;E108,7_Enh;E122,2_TssAFlnk	E083,7_Enh;E095,1_TssA;E104,1_TssA	E122
76	previously not reported	MTUS1	8:17550623:A:G	rs4921804	8	17550623	G	A	8:17550982:C:G	rs7846560	8	17550982	G	C	0.966892	E039,7_Enh;E047,7_Enh;E061,7_Enh;E063,1_TssA;E065,7_Enh;E067,1_TssA;E068,2_TssAFlnk;E069,1_TssA;E071,1_TssA;E072,1_TssA;E073,1_TssA;E074,1_TssA;E078,1_TssA;E083,7_Enh;E088,7_Enh;E092,7_Enh;E095,3_TxFlnk;E100,2_TssAFlnk;E104,2_TssAFlnk;E107,2_TssAFlnk;E108,7_Enh;E122,2_TssAFlnk	E083,7_Enh;E095,3_TxFlnk;E104,2_TssAFlnk	E007;E083;E088;E122	E083
76	previously not reported	MTUS1	8:17550623:A:G	rs4921804	8	17550623	G	A	8:17552072:C:G	rs11780261	8	17552072	G	C	0.925032	E039,7_Enh;E043,7_Enh;E047,7_Enh;E059,7_Enh;E061,7_Enh;E063,1_TssA;E067,1_TssA;E068,1_TssA;E069,1_TssA;E071,1_TssA;E072,1_TssA;E073,1_TssA;E074,1_TssA;E078,1_TssA;E083,7_Enh;E090,7_Enh;E095,2_TssAFlnk;E096,7_Enh;E097,7_Enh;E100,7_Enh;E104,1_TssA;E105,7_Enh;E107,7_Enh;E108,2_TssAFlnk;E111,1_TssA;E122,2_TssAFlnk	E083,7_Enh;E095,2_TssAFlnk;E104,1_TssA;E105,7_Enh
76	previously not reported	MTUS1	8:17550623:A:G	rs4921804	8	17550623	G	A	8:17552782:C:G	rs6990651	8	17552782	G	C	0.923417	E017,7_Enh;E023,1_TssA;E025,2_TssAFlnk;E033,7_Enh;E034,7_Enh;E037,7_Enh;E038,7_Enh;E039,7_Enh;E041,7_Enh;E043,7_Enh;E047,7_Enh;E048,2_TssAFlnk;E052,7_Enh;E055,7_Enh;E059,7_Enh;E061,2_TssAFlnk;E063,1_TssA;E065,1_TssA;E067,1_TssA;E068,2_TssAFlnk;E069,1_TssA;E071,1_TssA;E072,1_TssA;E073,1_TssA;E074,1_TssA;E076,7_Enh;E078,1_TssA;E080,2_TssAFlnk;E083,2_TssAFlnk;E084,6_EnhG;E085,1_TssA;E086,7_Enh;E087,…	E083,2_TssAFlnk;E095,1_TssA;E104,1_TssA;E105,2_TssAFlnk	E089;E100;E122
76	previously not reported	MTUS1	8:17550623:A:G	rs4921804	8	17550623	G	A	8:17552994:A:G	rs34393160	8	17552994	A	G	0.928983	E013,7_Enh;E017,7_Enh;E023,2_TssAFlnk;E025,2_TssAFlnk;E033,7_Enh;E034,7_Enh;E037,7_Enh;E038,7_Enh;E039,7_Enh;E040,2_TssAFlnk;E041,2_TssAFlnk;E042,7_Enh;E043,7_Enh;E045,1_TssA;E047,2_TssAFlnk;E048,2_TssAFlnk;E052,7_Enh;E054,7_Enh;E055,7_Enh;E058,7_Enh;E059,7_Enh;E061,2_TssAFlnk;E063,2_TssAFlnk;E065,1_TssA;E067,1_TssA;E068,1_TssA;E069,1_TssA;E071,1_TssA;E072,1_TssA;E073,1_TssA;E074,1_TssA;E076,2_Ts…	E083,2_TssAFlnk;E095,1_TssA;E104,1_TssA;E105,1_TssA	E006;E017;E059;E080;E083;E084;E088;E089;E090;E092;E098;E100;E119;E121;E122	E083
77	previously not reported	XPO7	8:21775838:C:G	rs56317071	8	21775838	G	C	8:21775838:C:G	rs56317071	8	21775838	G	C	1	E001,1_TssA;E002,1_TssA;E003,1_TssA;E004,1_TssA;E005,1_TssA;E006,7_Enh;E007,1_TssA;E008,1_TssA;E009,1_TssA;E010,2_TssAFlnk;E011,1_TssA;E012,1_TssA;E013,2_TssAFlnk;E014,2_TssAFlnk;E015,1_TssA;E016,2_TssAFlnk;E018,1_TssA;E019,2_TssAFlnk;E020,1_TssA;E021,1_TssA;E022,1_TssA;E023,7_Enh;E024,1_TssA;E025,2_TssAFlnk;E026,7_Enh;E027,2_TssAFlnk;E028,7_Enh;E029,7_Enh;E030,2_TssAFlnk;E031,2_TssAFlnk;E032,2_T…	E083,7_Enh;E095,7_Enh;E104,1_TssA;E105,1_TssA	E003;E004;E007;E008;E021;E022;E028;E032;E033;E034;E046;E050;E056;E059;E084;E090;E091;E093;E097;E098;E109;E116;E123
78	previously not reported	RBPMS	8:30302465:C:T	rs4545054	8	30302465	T	C	8:30300915:C:T	rs6996887	8	30300915	C	T	0.973054	E003,7_Enh;E014,6_EnhG;E016,6_EnhG;E018,6_EnhG;E019,6_EnhG;E076,7_Enh;E083,7_Enh;E103,7_Enh;E111,6_EnhG	E083,7_Enh	E083	E083
78	previously not reported	RBPMS	8:30302465:C:T	rs4545054	8	30302465	T	C	8:30302465:C:T	rs4545054	8	30302465	T	C	1	E011,7_Enh;E013,6_EnhG;E014,6_EnhG;E015,6_EnhG;E016,6_EnhG;E017,6_EnhG;E019,6_EnhG;E020,6_EnhG;E024,6_EnhG;E027,6_EnhG;E036,7_Enh;E050,7_Enh;E076,7_Enh;E080,7_Enh;E083,7_Enh;E103,7_Enh;E110,7_Enh;E111,7_Enh;E118,6_EnhG	E083,7_Enh
78	previously not reported	RBPMS	8:30302465:C:T	rs4545054	8	30302465	T	C	8:30303833:A:C	rs4416792	8	30303833	A	C	0.980913	E001,6_EnhG;E002,7_Enh;E003,6_EnhG;E013,6_EnhG;E014,6_EnhG;E015,6_EnhG;E016,6_EnhG;E018,7_Enh;E019,6_EnhG;E020,6_EnhG;E024,6_EnhG;E035,7_Enh;E036,7_Enh;E050,7_Enh;E051,7_Enh;E058,7_Enh;E076,7_Enh;E083,7_Enh;E084,7_Enh;E085,7_Enh;E092,6_EnhG;E102,7_Enh;E103,7_Enh;E106,7_Enh;E111,7_Enh	E083,7_Enh	E006;E050;E080;E086;E109
78	previously not reported	RBPMS	8:30302465:C:T	rs4545054	8	30302465	T	C	8:30305180:A:G	rs13256027	8	30305180	G	A	0.983257	E001,6_EnhG;E013,6_EnhG;E014,6_EnhG;E015,7_Enh;E016,6_EnhG;E018,7_Enh;E019,6_EnhG;E020,6_EnhG;E024,6_EnhG;E035,7_Enh;E036,7_Enh;E050,7_Enh;E051,7_Enh;E055,7_Enh;E076,7_Enh;E083,7_Enh;E103,7_Enh;E111,7_Enh;E114,7_Enh	E083,7_Enh	E006
78	previously not reported	RBPMS	8:30302465:C:T	rs10954994	8	30302465	T	C	8:30306419:A:C		8	30306419	C	A	0.985643			E083;E088;E092;E093	E083
78	previously not reported	RBPMS	8:30302465:C:T	rs4545054	8	30302465	T	C	8:30310335:C:T	rs13275869	8	30310335	T	C	0.981653	E001,7_Enh;E002,7_Enh;E003,7_Enh;E004,7_Enh;E007,7_Enh;E011,7_Enh;E012,7_Enh;E013,6_EnhG;E014,7_Enh;E015,7_Enh;E016,7_Enh;E017,7_Enh;E018,7_Enh;E019,2_TssAFlnk;E020,7_Enh;E021,7_Enh;E024,7_Enh;E025,7_Enh;E027,7_Enh;E036,7_Enh;E050,7_Enh;E051,7_Enh;E053,7_Enh;E055,7_Enh;E056,7_Enh;E059,7_Enh;E061,7_Enh;E065,7_Enh;E066,7_Enh;E076,7_Enh;E078,2_TssAFlnk;E083,2_TssAFlnk;E084,7_Enh;E085,7_Enh;E086,7_En…	E083,2_TssAFlnk;E104,7_Enh;E105,7_Enh	E004;E006;E083;E097	E083
78	previously not reported	RBPMS	8:30302465:C:T	rs4545054	8	30302465	T	C	8:30316162:A:G	rs13248936	8	30316162	A	G	0.965237	E015,7_Enh;E017,6_EnhG;E018,7_Enh;E019,7_Enh;E023,7_Enh;E025,7_Enh;E027,7_Enh;E052,7_Enh;E055,7_Enh;E058,7_Enh;E076,7_Enh;E111,7_Enh;E114,7_Enh;E126,7_Enh;E129,7_Enh		E006;E008;E017;E055;E056;E119;E120;E126;E128
78	previously not reported	RBPMS	8:30302465:C:T	rs4545054	8	30302465	T	C	8:30322735:G:T	rs7824823	8	30322735	T	G	0.955868	E020,6_EnhG;E023,7_Enh;E025,7_Enh;E026,7_Enh;E027,6_EnhG;E028,7_Enh;E035,7_Enh;E050,7_Enh;E051,7_Enh;E055,7_Enh;E057,7_Enh;E058,7_Enh;E063,7_Enh;E066,7_Enh;E076,7_Enh;E078,7_Enh;E080,7_Enh;E083,7_Enh;E103,7_Enh;E111,7_Enh;E114,7_Enh;E117,7_Enh;E118,7_Enh;E119,7_Enh;E125,7_Enh;E127,7_Enh;E128,7_Enh;E129,7_Enh	E083,7_Enh	E117
78	previously not reported	RBPMS	8:30302465:C:T	rs4545054	8	30302465	T	C	8:30324803:C:T	rs4292648	8	30324803	C	T	0.961919	E003,6_EnhG;E008,7_Enh;E012,7_Enh;E013,6_EnhG;E014,6_EnhG;E015,6_EnhG;E016,6_EnhG;E017,6_EnhG;E018,7_Enh;E019,6_EnhG;E020,6_EnhG;E027,6_EnhG;E031,7_Enh;E032,7_Enh;E035,7_Enh;E036,7_Enh;E050,7_Enh;E051,7_Enh;E055,7_Enh;E056,7_Enh;E059,7_Enh;E061,7_Enh;E063,7_Enh;E065,7_Enh;E066,7_Enh;E076,7_Enh;E078,7_Enh;E080,7_Enh;E083,7_Enh;E090,7_Enh;E095,6_EnhG;E097,6_EnhG;E098,7_Enh;E103,7_Enh;E105,7_Enh;E10…	E083,7_Enh;E095,6_EnhG;E105,7_Enh	E059
78	previously not reported	RBPMS	8:30302465:C:T	rs4545054	8	30302465	T	C	8:30341945:A:G	rs6997017	8	30341945	A	G	0.904313	E013,6_EnhG;E016,6_EnhG;E017,7_Enh;E018,7_Enh;E023,7_Enh;E025,7_Enh;E051,7_Enh;E076,7_Enh;E083,7_Enh;E086,7_Enh;E088,7_Enh;E092,7_Enh;E103,7_Enh;E111,7_Enh;E114,6_EnhG;E118,7_Enh;E125,7_Enh;E126,7_Enh;E128,7_Enh	E083,7_Enh	E083;E086;E118	E083
78	previously not reported	RBPMS	8:30302465:C:T	rs4545054	8	30302465	T	C	8:30344150:D:I	rs148827958	8	30344150	I	A	0.900502	E016,6_EnhG;E017,6_EnhG;E022,7_Enh;E023,7_Enh;E025,7_Enh;E027,7_Enh;E055,6_EnhG;E063,7_Enh;E076,7_Enh;E095,7_Enh;E103,7_Enh;E111,7_Enh;E118,7_Enh;E128,7_Enh	E095,7_Enh	E090
78	previously not reported	RBPMS	8:30302465:C:T	rs4545054	8	30302465	T	C	8:30344444:C:T	rs4147357	8	30344444	T	C	0.901176	E001,7_Enh;E004,7_Enh;E014,7_Enh;E015,6_EnhG;E016,6_EnhG;E017,6_EnhG;E018,7_Enh;E019,7_Enh;E020,6_EnhG;E023,7_Enh;E024,7_Enh;E025,6_EnhG;E027,7_Enh;E049,7_Enh;E053,7_Enh;E061,7_Enh;E063,7_Enh;E076,7_Enh;E078,7_Enh;E080,7_Enh;E103,7_Enh;E111,7_Enh;E114,6_EnhG;E118,7_Enh;E128,7_Enh		E059;E080;E097;E118
78	previously not reported	RBPMS	8:30302465:C:T	rs4545054	8	30302465	T	C	8:30346587:A:G	rs13250304	8	30346587	G	A	0.900257	E014,6_EnhG;E016,6_EnhG;E076,6_EnhG		E006;E121
78	previously not reported	RBPMS	8:30302465:C:T	rs4545054	8	30302465	T	C	8:30349914:A:G	rs7840384	8	30349914	A	G	0.897997	E003,7_Enh;E014,6_EnhG;E016,6_EnhG;E017,6_EnhG;E018,7_Enh;E019,6_EnhG;E020,6_EnhG;E023,7_Enh;E027,6_EnhG;E054,7_Enh;E059,7_Enh;E061,7_Enh;E076,7_Enh;E078,7_Enh;E083,7_Enh;E103,7_Enh;E111,7_Enh;E114,7_Enh;E118,7_Enh;E128,7_Enh	E083,7_Enh
78	previously not reported	RBPMS	8:30302465:C:T	rs4545054	8	30302465	T	C	8:30352258:C:T	rs7812836	8	30352258	C	T	0.901102	E011,7_Enh;E012,7_Enh;E014,6_EnhG;E015,6_EnhG;E016,6_EnhG;E017,6_EnhG;E018,7_Enh;E019,7_Enh;E020,6_EnhG;E023,7_Enh;E024,6_EnhG;E027,6_EnhG;E055,7_Enh;E063,7_Enh;E065,7_Enh;E076,7_Enh;E083,7_Enh;E086,7_Enh;E092,7_Enh;E095,7_Enh;E103,7_Enh;E111,6_EnhG;E118,6_EnhG;E128,6_EnhG	E083,7_Enh;E095,7_Enh	E021
78	previously not reported	RBPMS	8:30302465:C:T	rs4545054	8	30302465	T	C	8:30365489:A:T	rs6997010	8	30365489	T	A	0.844235	E001,6_EnhG;E014,6_EnhG;E016,6_EnhG;E018,6_EnhG;E026,6_EnhG;E027,6_EnhG;E076,6_EnhG;E083,7_Enh;E103,7_Enh;E111,6_EnhG;E118,6_EnhG	E083,7_Enh
78	previously not reported	RBPMS	8:30302465:C:T	rs4545054	8	30302465	T	C	8:30366899:C:G	rs6468374	8	30366899	C	G	0.833475	E009,7_Enh;E010,7_Enh;E011,7_Enh;E012,7_Enh;E016,6_EnhG;E017,6_EnhG;E020,6_EnhG;E027,6_EnhG;E028,7_Enh;E057,7_Enh;E058,7_Enh;E065,6_EnhG;E076,6_EnhG;E078,6_EnhG;E080,6_EnhG;E083,7_Enh;E094,7_Enh;E095,6_EnhG;E103,7_Enh;E106,7_Enh;E110,7_Enh;E111,6_EnhG;E118,6_EnhG;E119,7_Enh;E122,7_Enh;E127,7_Enh	E083,7_Enh;E095,6_EnhG	E004;E005;E028;E057;E083;E094;E098;E117;E119	E083
78	previously not reported	RBPMS	8:30302465:C:T	rs4545054	8	30302465	T	C	8:30383013:A:G	rs2979531	8	30383013	A	G	0.811668	E014,6_EnhG;E015,6_EnhG;E016,7_Enh;E017,6_EnhG;E018,7_Enh;E019,7_Enh;E020,6_EnhG;E024,7_Enh;E026,7_Enh;E052,7_Enh;E076,7_Enh;E078,7_Enh;E083,7_Enh;E084,7_Enh;E085,7_Enh;E086,7_Enh;E092,7_Enh;E103,7_Enh;E110,7_Enh;E111,7_Enh;E114,7_Enh;E122,7_Enh;E125,7_Enh;E128,7_Enh;E129,7_Enh	E083,7_Enh	E017;E021;E084;E085;E109;E128
78	previously not reported	RBPMS	8:30302465:C:T	rs4545054	8	30302465	T	C	8:30387590:A:G	rs2979506	8	30387590	G	A	0.806919	E014,6_EnhG;E017,6_EnhG;E055,6_EnhG;E066,7_Enh;E076,6_EnhG
78	previously not reported	RBPMS	8:30302465:C:T	rs4545054	8	30302465	T	C	8:30388869:D:I	rs34237487	8	30388869	D	I	0.812581	E001,6_EnhG;E003,7_Enh;E011,7_Enh;E012,7_Enh;E013,6_EnhG;E014,6_EnhG;E015,6_EnhG;E016,6_EnhG;E017,6_EnhG;E018,7_Enh;E019,6_EnhG;E020,6_EnhG;E021,7_Enh;E023,6_EnhG;E024,7_Enh;E025,6_EnhG;E026,7_Enh;E027,6_EnhG;E028,7_Enh;E049,7_Enh;E052,2_TssAFlnk;E055,2_TssAFlnk;E056,7_Enh;E057,7_Enh;E058,7_Enh;E059,7_Enh;E066,2_TssAFlnk;E076,7_Enh;E077,7_Enh;E078,7_Enh;E080,7_Enh;E083,7_Enh;E084,7_Enh;E085,7_Enh…	E083,7_Enh;E095,7_Enh;E104,7_Enh;E105,7_Enh	E029;E055;E114;E119;E122
78	previously not reported	RBPMS	8:30302465:C:T	rs4545054	8	30302465	T	C	8:30390205:A:G	rs2979510	8	30390205	G	A	0.810961	E001,6_EnhG;E002,6_EnhG;E003,7_Enh;E008,7_Enh;E012,7_Enh;E014,6_EnhG;E015,6_EnhG;E016,6_EnhG;E017,6_EnhG;E018,7_Enh;E019,6_EnhG;E020,6_EnhG;E021,6_EnhG;E023,6_EnhG;E024,7_Enh;E025,6_EnhG;E026,7_Enh;E027,6_EnhG;E028,7_Enh;E052,7_Enh;E055,7_Enh;E056,7_Enh;E057,7_Enh;E058,7_Enh;E065,6_EnhG;E066,7_Enh;E076,6_EnhG;E077,7_Enh;E078,7_Enh;E083,7_Enh;E084,7_Enh;E085,7_Enh;E086,7_Enh;E087,7_Enh;E088,7_Enh;…	E083,7_Enh;E095,7_Enh	E028;E057;E084;E085;E114;E117;E119;E121;E127
78	previously not reported	RBPMS	8:30302465:C:T	rs4545054	8	30302465	T	C	8:30390284:C:T	rs2915589	8	30390284	C	T	0.814201	E001,6_EnhG;E002,6_EnhG;E003,7_Enh;E008,7_Enh;E012,7_Enh;E014,6_EnhG;E015,6_EnhG;E016,6_EnhG;E017,6_EnhG;E018,7_Enh;E019,6_EnhG;E020,6_EnhG;E021,6_EnhG;E023,6_EnhG;E024,7_Enh;E025,6_EnhG;E026,7_Enh;E027,6_EnhG;E028,7_Enh;E052,7_Enh;E055,7_Enh;E056,7_Enh;E057,7_Enh;E058,7_Enh;E065,6_EnhG;E066,7_Enh;E076,6_EnhG;E077,7_Enh;E078,7_Enh;E083,7_Enh;E084,7_Enh;E085,7_Enh;E086,7_Enh;E087,7_Enh;E088,7_Enh;…	E083,7_Enh;E095,7_Enh	E028;E057;E084;E085;E097;E114;E117;E119
78	previously not reported	RBPMS	8:30302465:C:T	rs4545054	8	30302465	T	C	8:30397315:G:T	rs2915593	8	30397315	T	G	0.834589	E001,7_Enh;E003,7_Enh;E005,7_Enh;E006,6_EnhG;E007,7_Enh;E008,7_Enh;E011,7_Enh;E012,7_Enh;E013,6_EnhG;E014,7_Enh;E015,7_Enh;E016,7_Enh;E017,6_EnhG;E018,7_Enh;E019,7_Enh;E020,7_Enh;E022,7_Enh;E023,7_Enh;E024,7_Enh;E025,7_Enh;E026,7_Enh;E027,7_Enh;E028,7_Enh;E052,7_Enh;E053,7_Enh;E055,7_Enh;E056,6_EnhG;E057,7_Enh;E058,7_Enh;E059,7_Enh;E065,7_Enh;E075,7_Enh;E076,7_Enh;E079,7_Enh;E083,7_Enh;E095,7_Enh…	E083,7_Enh;E095,7_Enh;E104,7_Enh
79	previously not reported	AZIN1*	8:103914366:A:C	rs565720	8	103914366	A	C	8:103914366:A:C	rs565720	8	103914366	A	C	1	E066,7_Enh
80	previously not reported	RP11-1082L8.3	8:125859817:A:C	rs35006907	8	125859817	C	A	8:125858521:A:G	rs72716972	8	125858521	G	A	0.885905	E023,7_Enh;E025,7_Enh;E027,7_Enh;E057,7_Enh;E058,7_Enh;E061,7_Enh;E083,7_Enh;E091,7_Enh;E095,7_Enh;E097,7_Enh;E119,7_Enh;E126,7_Enh;E127,7_Enh	E083,7_Enh;E095,7_Enh	E097;E121
80	previously not reported	RP11-1082L8.3	8:125859817:A:C	rs35006907	8	125859817	C	A	8:125859817:A:C	rs35006907	8	125859817	C	A	1	E005,7_Enh;E013,7_Enh;E017,7_Enh;E023,7_Enh;E025,7_Enh;E026,2_TssAFlnk;E027,7_Enh;E028,7_Enh;E029,7_Enh;E035,7_Enh;E036,2_TssAFlnk;E046,7_Enh;E049,7_Enh;E050,7_Enh;E051,2_TssAFlnk;E052,7_Enh;E055,7_Enh;E056,7_Enh;E057,7_Enh;E058,7_Enh;E059,7_Enh;E061,7_Enh;E063,7_Enh;E072,7_Enh;E079,7_Enh;E080,7_Enh;E083,7_Enh;E085,7_Enh;E089,7_Enh;E090,7_Enh;E091,7_Enh;E095,7_Enh;E096,7_Enh;E097,7_Enh;E098,7_Enh…	E083,7_Enh;E095,7_Enh;E104,7_Enh;E105,7_Enh	E006;E029;E033;E059;E083;E088;E091;E097;E098;E100;E120;E121;E122;E123	E083
80	previously not reported	RP11-1082L8.3	8:125859817:A:C	rs35006907	8	125859817	C	A	8:125859850:A:G	rs34866937	8	125859850	G	A	0.833357	E005,7_Enh;E013,7_Enh;E017,7_Enh;E023,7_Enh;E025,7_Enh;E026,2_TssAFlnk;E027,7_Enh;E028,7_Enh;E029,7_Enh;E035,7_Enh;E036,2_TssAFlnk;E046,7_Enh;E049,7_Enh;E050,7_Enh;E051,2_TssAFlnk;E052,7_Enh;E055,7_Enh;E056,7_Enh;E057,7_Enh;E058,7_Enh;E059,7_Enh;E061,7_Enh;E063,7_Enh;E072,7_Enh;E079,7_Enh;E080,7_Enh;E083,7_Enh;E085,7_Enh;E089,7_Enh;E090,7_Enh;E091,7_Enh;E095,7_Enh;E096,7_Enh;E097,7_Enh;E098,7_Enh…	E083,7_Enh;E095,7_Enh;E104,7_Enh;E105,7_Enh	E006;E029;E059;E083;E088;E090;E091;E097;E100;E120;E121;E122;E123	E083
80	previously not reported	RP11-1082L8.3	8:125859817:A:C	rs35006907	8	125859817	C	A	8:125861374:C:T	rs7461129	8	125861374	C	T	0.958987	E003,7_Enh;E005,7_Enh;E015,7_Enh;E018,7_Enh;E019,7_Enh;E020,7_Enh;E021,7_Enh;E023,7_Enh;E024,7_Enh;E025,7_Enh;E027,7_Enh;E028,7_Enh;E029,7_Enh;E035,7_Enh;E036,7_Enh;E049,7_Enh;E050,7_Enh;E051,7_Enh;E052,7_Enh;E053,7_Enh;E056,7_Enh;E057,2_TssAFlnk;E058,2_TssAFlnk;E061,7_Enh;E062,7_Enh;E063,7_Enh;E068,7_Enh;E071,7_Enh;E075,1_TssA;E077,2_TssAFlnk;E078,7_Enh;E083,7_Enh;E084,2_TssAFlnk;E085,2_TssAFlnk…	E083,7_Enh;E095,2_TssAFlnk;E104,7_Enh	E021;E050;E057;E083;E093;E123	E083
80	previously not reported	RP11-1082L8.3	8:125859817:A:C	rs35006907	8	125859817	C	A	8:125894151:C:T	rs28455756	8	125894151	C	T	0.893645	E057,7_Enh;E089,7_Enh;E120,7_Enh
81	previously not reported	PTK2	8:142006198:C:G	rs10106406	8	142006198	C	G	8:141718701:A:T	rs11776239	8	141718701	A	T	0.824171	E004,7_Enh;E009,7_Enh;E010,7_Enh;E011,7_Enh;E053,7_Enh;E054,6_EnhG;E065,7_Enh;E067,7_Enh;E068,7_Enh;E069,7_Enh;E071,7_Enh;E072,7_Enh;E073,7_Enh;E074,7_Enh;E078,7_Enh;E082,7_Enh;E085,7_Enh;E107,7_Enh;E126,6_EnhG		E083	E083
81	previously not reported	PTK2	8:142006198:C:G	rs10106406	8	142006198	C	G	8:141719251:A:G	rs11166995	8	141719251	A	G	0.850701	E004,7_Enh;E009,7_Enh;E010,7_Enh;E011,7_Enh;E052,7_Enh;E054,7_Enh;E067,7_Enh;E068,7_Enh;E069,7_Enh;E071,7_Enh;E072,7_Enh;E073,7_Enh;E074,7_Enh;E114,7_Enh;E126,6_EnhG		E056;E119
81	previously not reported	PTK2	8:142006198:C:G	rs10106406	8	142006198	C	G	8:141731000:A:G	rs11783573	8	141731000	A	G	0.872347	E057,7_Enh;E067,7_Enh;E074,7_Enh
81	previously not reported	PTK2	8:142006198:C:G	rs10106406	8	142006198	C	G	8:141735794:G:T	rs11783270	8	141735794	T	G	0.868545	E013,6_EnhG;E017,7_Enh;E023,7_Enh;E025,7_Enh;E026,7_Enh;E027,7_Enh;E028,7_Enh;E049,7_Enh;E052,2_TssAFlnk;E055,7_Enh;E056,7_Enh;E057,7_Enh;E058,7_Enh;E059,7_Enh;E061,7_Enh;E067,7_Enh;E068,7_Enh;E069,7_Enh;E071,7_Enh;E072,7_Enh;E073,7_Enh;E074,7_Enh;E076,7_Enh;E079,7_Enh;E080,6_EnhG;E090,6_EnhG;E092,6_EnhG;E097,7_Enh;E102,7_Enh;E103,7_Enh;E114,6_EnhG;E117,7_Enh;E119,7_Enh;E120,6_EnhG;E121,7_Enh;E12…		E028;E057;E059;E117;E121;E128
81	previously not reported	PTK2	8:142006198:C:G	rs10106406	8	142006198	C	G	8:141775337:C:T	rs4246124	8	141775337	C	T	0.874579	E017,7_Enh;E025,7_Enh;E049,7_Enh;E052,7_Enh;E055,7_Enh;E061,7_Enh;E067,7_Enh;E071,7_Enh;E074,7_Enh;E122,7_Enh;E125,7_Enh;E126,7_Enh;E128,7_Enh;E129,7_Enh		E006;E017;E055;E056;E100;E120;E121;E125;E128
81	previously not reported	PTK2	8:142006198:C:G	rs10106406	8	142006198	C	G	8:141788529:G:T	rs4246125	8	141788529	G	T	0.85942	E069,6_EnhG
81	previously not reported	PTK2	8:142006198:C:G	rs10106406	8	142006198	C	G	8:141829810:A:G	rs11166999	8	141829810	G	A	0.814174	E017,6_EnhG;E063,7_Enh;E070,7_Enh;E076,7_Enh;E078,7_Enh;E083,7_Enh;E084,6_EnhG;E085,7_Enh;E097,7_Enh;E103,7_Enh;E111,7_Enh	E083,7_Enh	E083;E097	E083
81	previously not reported	PTK2	8:142006198:C:G	rs10106406	8	142006198	C	G	8:141830437:A:T	rs7001489	8	141830437	A	T	0.814794	E017,6_EnhG;E063,7_Enh;E076,7_Enh;E097,7_Enh;E103,7_Enh
81	previously not reported	PTK2	8:142006198:C:G	rs10106406	8	142006198	C	G	8:141831241:C:T	rs7010459	8	141831241	T	C	0.811759	E076,7_Enh;E080,6_EnhG;E083,2_TssAFlnk;E097,6_EnhG;E098,7_Enh;E099,6_EnhG;E103,7_Enh;E107,7_Enh;E110,7_Enh	E083,2_TssAFlnk	E005;E083	E083
81	previously not reported	PTK2	8:142006198:C:G	rs10106406	8	142006198	C	G	8:141831989:C:T	rs9650572	8	141831989	C	T	0.814794	E076,7_Enh;E083,7_Enh;E097,7_Enh;E103,7_Enh;E107,7_Enh	E083,7_Enh
81	previously not reported	PTK2	8:142006198:C:G	rs10106406	8	142006198	C	G	8:141833530:A:G	rs6578139	8	141833530	G	A	0.814794	E083,7_Enh	E083,7_Enh
81	previously not reported	PTK2	8:142006198:C:G	rs10106406	8	142006198	C	G	8:141833566:D:I	rs5895648	8	141833566	I	C	0.901969	E083,7_Enh	E083,7_Enh
81	previously not reported	PTK2	8:142006198:C:G	rs10106406	8	142006198	C	G	8:141833581:D:I	rs5895649	8	141833581	D	I	0.88629	E083,7_Enh	E083,7_Enh
81	previously not reported	PTK2	8:142006198:C:G	rs10106406	8	142006198	C	G	8:141834000:A:G	rs7001591	8	141834000	G	A	0.814794	E025,7_Enh;E083,7_Enh;E126,7_Enh	E083,7_Enh
81	previously not reported	PTK2	8:142006198:C:G	rs10106406	8	142006198	C	G	8:141834110:A:T	rs6578140	8	141834110	T	A	0.814794	E025,7_Enh;E055,7_Enh;E083,7_Enh;E126,7_Enh	E083,7_Enh	E046;E126
81	previously not reported	PTK2	8:142006198:C:G	rs10106406	8	142006198	C	G	8:141839234:A:G	rs4961297	8	141839234	G	A	0.81307	E053,7_Enh;E054,6_EnhG;E071,7_Enh;E072,7_Enh;E074,7_Enh		E122
81	previously not reported	PTK2	8:142006198:C:G	rs10106406	8	142006198	C	G	8:141839387:D:I	rs11316427	8	141839387	I	T	0.81307	E053,7_Enh;E054,6_EnhG;E071,7_Enh;E072,7_Enh;E074,7_Enh
81	previously not reported	PTK2	8:142006198:C:G	rs4246127	8	142006198	C	G	8:141840645:A:G		8	141840645	G	A	0.807165			E034
81	previously not reported	PTK2	8:142006198:C:G	rs4246128	8	142006198	C	G	8:141840739:A:G		8	141840739	G	A	0.811828			E127
81	previously not reported	PTK2	8:142006198:C:G	rs10106406	8	142006198	C	G	8:141841577:A:G	rs13251663	8	141841577	A	G	0.81307	E025,7_Enh;E037,7_Enh;E069,7_Enh;E076,7_Enh;E114,7_Enh;E122,7_Enh;E126,7_Enh		E006;E007;E021;E028;E032;E033;E034;E046;E059;E080;E082;E083;E084;E088;E089;E090;E109;E114;E117;E119;E122;E123	E083
81	previously not reported	PTK2	8:142006198:C:G	rs10106406	8	142006198	C	G	8:141848241:A:G	rs6982216	8	141848241	G	A	0.818852	E006,7_Enh
81	previously not reported	PTK2	8:142006198:C:G	rs10106406	8	142006198	C	G	8:141854402:G:T	rs11167001	8	141854402	T	G	0.814041	E001,7_Enh;E014,6_EnhG;E018,7_Enh;E020,7_Enh;E085,7_Enh;E087,7_Enh		E084
81	previously not reported	PTK2	8:142006198:C:G	rs10106406	8	142006198	C	G	8:141854509:C:G	rs11167002	8	141854509	G	C	0.815285	E001,7_Enh;E014,6_EnhG;E018,7_Enh;E020,7_Enh;E085,7_Enh;E087,7_Enh		E084
81	previously not reported	PTK2	8:142006198:C:G	rs10106406	8	142006198	C	G	8:141854531:D:I	rs146710564	8	141854531	D	I	0.813288	E001,7_Enh;E014,6_EnhG;E018,7_Enh;E020,7_Enh;E085,7_Enh;E087,7_Enh
81	previously not reported	PTK2	8:142006198:C:G	rs10106406	8	142006198	C	G	8:141854956:C:T	rs13256088	8	141854956	T	C	0.813421	E001,7_Enh;E014,6_EnhG;E015,6_EnhG;E016,6_EnhG;E018,7_Enh;E019,6_EnhG;E020,6_EnhG;E085,7_Enh		E008
81	previously not reported	PTK2	8:142006198:C:G	rs10106406	8	142006198	C	G	8:141854964:C:T	rs13256101	8	141854964	T	C	0.814041	E001,7_Enh;E014,6_EnhG;E015,6_EnhG;E016,6_EnhG;E018,7_Enh;E019,6_EnhG;E020,6_EnhG;E085,7_Enh		E008
81	previously not reported	PTK2	8:142006198:C:G	rs10106406	8	142006198	C	G	8:141855093:C:T	rs11787521	8	141855093	C	T	0.814041	E001,2_TssAFlnk;E003,7_Enh;E008,7_Enh;E014,6_EnhG;E015,6_EnhG;E016,6_EnhG;E017,6_EnhG;E018,7_Enh;E019,7_Enh;E020,6_EnhG;E021,7_Enh;E022,7_Enh;E085,7_Enh;E100,7_Enh		E008
81	previously not reported	PTK2	8:142006198:C:G	rs10106406	8	142006198	C	G	8:141862562:C:T	rs11785111	8	141862562	T	C	0.819131	E087,7_Enh
81	previously not reported	PTK2	8:142006198:C:G	rs13282141	8	142006198	C	G	8:141862791:A:G		8	141862791	G	A	0.819131			E089
81	previously not reported	PTK2	8:142006198:C:G	rs10106406	8	142006198	C	G	8:141867516:A:T	rs13253993	8	141867516	T	A	0.818863	E013,6_EnhG;E056,6_EnhG;E061,7_Enh;E123,7_Enh		E004;E059;E091
81	previously not reported	PTK2	8:142006198:C:G	rs10106406	8	142006198	C	G	8:141873688:A:G	rs13271554	8	141873688	A	G	0.819687	E001,7_Enh;E002,7_Enh;E003,7_Enh;E004,7_Enh;E008,7_Enh;E014,6_EnhG;E015,6_EnhG;E016,7_Enh;E018,7_Enh;E019,7_Enh;E020,7_Enh;E021,7_Enh;E024,7_Enh;E052,7_Enh;E083,7_Enh;E125,6_EnhG;E129,6_EnhG	E083,7_Enh	E021
81	previously not reported	PTK2	8:142006198:C:G	rs10106406	8	142006198	C	G	8:141875162:G:T	rs13265942	8	141875162	T	G	0.805282	E020,7_Enh		E005
81	previously not reported	PTK2	8:142006198:C:G	rs10106406	8	142006198	C	G	8:141877028:A:G	rs7008498	8	141877028	A	G	0.820381	E028,7_Enh;E118,7_Enh
81	previously not reported	PTK2	8:142006198:C:G	rs10106406	8	142006198	C	G	8:141878414:C:T	rs9324536	8	141878414	T	C	0.822895	E001,7_Enh;E004,7_Enh;E028,6_EnhG;E066,7_Enh;E076,7_Enh;E114,7_Enh;E118,7_Enh		E006;E081;E082
81	previously not reported	PTK2	8:142006198:C:G	rs10106406	8	142006198	C	G	8:141883156:C:T	rs11167005	8	141883156	C	T	0.841994	E066,7_Enh		E081;E114
81	previously not reported	PTK2	8:142006198:C:G	rs10106406	8	142006198	C	G	8:141883233:A:G	rs11775840	8	141883233	A	G	0.842714	E066,7_Enh		E086
81	previously not reported	PTK2	8:142006198:C:G	rs10106406	8	142006198	C	G	8:141883529:A:G	rs4074812	8	141883529	G	A	0.843579	E066,7_Enh
81	previously not reported	PTK2	8:142006198:C:G	rs10106406	8	142006198	C	G	8:141883566:D:I	rs71308991	8	141883566	D	I	0.807107	E066,7_Enh
81	previously not reported	PTK2	8:142006198:C:G	rs10106406	8	142006198	C	G	8:141883751:A:G	rs4074813	8	141883751	G	A	0.833497	E066,7_Enh		E114;E125
81	previously not reported	PTK2	8:142006198:C:G	rs10106406	8	142006198	C	G	8:141890513:G:T	rs13258028	8	141890513	T	G	0.860456	E017,6_EnhG;E025,7_Enh;E028,6_EnhG;E063,7_Enh;E080,7_Enh;E083,7_Enh;E095,7_Enh;E100,7_Enh;E108,7_Enh;E113,7_Enh;E114,7_Enh;E123,6_EnhG	E083,7_Enh;E095,7_Enh	E003;E098;E117
81	previously not reported	PTK2	8:142006198:C:G	rs10106406	8	142006198	C	G	8:141891821:A:G	rs13261338	8	141891821	A	G	0.856988	E001,6_EnhG;E004,7_Enh;E008,7_Enh;E014,7_Enh;E015,6_EnhG;E016,6_EnhG;E017,6_EnhG;E019,7_Enh;E022,7_Enh;E055,6_EnhG;E056,6_EnhG;E065,6_EnhG;E080,6_EnhG;E098,7_Enh;E104,7_Enh;E109,7_Enh;E113,7_Enh	E104,7_Enh	E006
81	previously not reported	PTK2	8:142006198:C:G	rs7830394	8	142006198	C	G	8:141894741:A:G		8	141894741	A	G	0.857607			E021
81	previously not reported	PTK2	8:142006198:C:G	rs10106406	8	142006198	C	G	8:141895497:A:G	rs11167006	8	141895497	A	G	0.857607	E057,7_Enh		E057;E082
81	previously not reported	PTK2	8:142006198:C:G	rs10106406	8	142006198	C	G	8:141895696:C:G	rs11998619	8	141895696	C	G	0.848105	E057,7_Enh;E127,7_Enh		E057;E127
81	previously not reported	PTK2	8:142006198:C:G	rs10106406	8	142006198	C	G	8:141896254:A:G	rs1868280	8	141896254	G	A	0.848105	E057,7_Enh
81	previously not reported	PTK2	8:142006198:C:G	rs10106406	8	142006198	C	G	8:141898518:C:T	rs11991796	8	141898518	T	C	0.841547	E011,6_EnhG
81	previously not reported	PTK2	8:142006198:C:G	rs10106406	8	142006198	C	G	8:141904388:A:G	rs1448226	8	141904388	A	G	0.847319	E094,7_Enh;E118,7_Enh;E123,7_Enh		E123
81	previously not reported	PTK2	8:142006198:C:G	rs10106406	8	142006198	C	G	8:141905612:A:C	rs13258420	8	141905612	C	A	0.850696	E023,7_Enh
81	previously not reported	PTK2	8:142006198:C:G	rs10106406	8	142006198	C	G	8:141907217:A:G	rs11783743	8	141907217	A	G	0.84841	E009,7_Enh;E011,7_Enh;E019,7_Enh;E023,7_Enh;E026,7_Enh;E049,7_Enh;E052,7_Enh;E053,7_Enh;E054,7_Enh;E067,7_Enh;E068,7_Enh;E069,7_Enh;E070,7_Enh;E071,7_Enh;E072,7_Enh;E074,7_Enh;E076,7_Enh;E083,7_Enh;E086,7_Enh;E087,7_Enh;E088,7_Enh;E100,7_Enh;E103,7_Enh;E107,7_Enh;E108,7_Enh;E114,7_Enh;E118,7_Enh;E120,7_Enh;E121,7_Enh;E123,7_Enh	E083,7_Enh	E121;E123
81	previously not reported	PTK2	8:142006198:C:G	rs10106406	8	142006198	C	G	8:141911445:C:T	rs13255947	8	141911445	T	C	0.880464	E020,7_Enh;E083,7_Enh;E114,7_Enh	E083,7_Enh	E008;E082
81	previously not reported	PTK2	8:142006198:C:G	rs10106406	8	142006198	C	G	8:141916188:D:I	rs71308995	8	141916188	D	I	0.881961	E027,7_Enh;E103,7_Enh;E118,7_Enh		E057
81	previously not reported	PTK2	8:142006198:C:G	rs10106406	8	142006198	C	G	8:141916932:G:T	rs13250787	8	141916932	G	T	0.879824	E078,7_Enh;E083,7_Enh;E105,7_Enh;E118,7_Enh	E083,7_Enh;E105,7_Enh
81	previously not reported	PTK2	8:142006198:C:G	rs10106406	8	142006198	C	G	8:141917656:A:T	rs11774679	8	141917656	A	T	0.881229	E023,7_Enh;E083,7_Enh;E095,7_Enh	E083,7_Enh;E095,7_Enh
81	previously not reported	PTK2	8:142006198:C:G	rs10106406	8	142006198	C	G	8:141917894:G:T	rs11777839	8	141917894	G	T	0.881961	E006,7_Enh;E023,7_Enh;E063,7_Enh;E065,7_Enh;E069,7_Enh;E071,7_Enh;E074,7_Enh;E076,7_Enh;E088,7_Enh;E095,7_Enh;E097,7_Enh;E100,7_Enh;E104,7_Enh;E105,7_Enh	E095,7_Enh;E104,7_Enh;E105,7_Enh
81	previously not reported	PTK2	8:142006198:C:G	rs10106406	8	142006198	C	G	8:141918030:D:I	rs34237996	8	141918030	I	T	0.881961	E023,7_Enh;E053,7_Enh;E063,7_Enh;E065,7_Enh;E067,7_Enh;E068,7_Enh;E069,7_Enh;E071,7_Enh;E072,7_Enh;E073,7_Enh;E074,7_Enh;E076,7_Enh;E078,7_Enh;E081,7_Enh;E088,7_Enh;E097,7_Enh;E098,7_Enh;E100,7_Enh;E104,7_Enh;E105,7_Enh	E104,7_Enh;E105,7_Enh
81	previously not reported	PTK2	8:142006198:C:G	rs10106406	8	142006198	C	G	8:141918181:C:G	rs11167007	8	141918181	G	C	0.881961	E023,7_Enh;E053,7_Enh;E063,7_Enh;E065,7_Enh;E067,7_Enh;E068,7_Enh;E069,7_Enh;E071,7_Enh;E072,7_Enh;E073,7_Enh;E074,7_Enh;E076,7_Enh;E078,7_Enh;E081,7_Enh;E088,7_Enh;E097,7_Enh;E098,7_Enh;E100,7_Enh;E104,7_Enh;E105,7_Enh	E104,7_Enh;E105,7_Enh	E081;E082;E083;E088;E089;E090;E092;E126	E083
81	previously not reported	PTK2	8:142006198:C:G	rs10106406	8	142006198	C	G	8:141918720:A:C	rs13264974	8	141918720	C	A	0.881106	E008,7_Enh;E023,7_Enh;E027,7_Enh;E053,7_Enh;E054,7_Enh;E063,7_Enh;E065,7_Enh;E067,7_Enh;E068,7_Enh;E069,7_Enh;E071,7_Enh;E072,7_Enh;E073,7_Enh;E074,7_Enh;E081,7_Enh;E088,7_Enh;E090,7_Enh;E095,7_Enh;E098,7_Enh;E100,7_Enh;E104,7_Enh;E105,7_Enh;E106,7_Enh;E109,7_Enh	E095,7_Enh;E104,7_Enh;E105,7_Enh	E083	E083
81	previously not reported	PTK2	8:142006198:C:G	rs10106406	8	142006198	C	G	8:141918880:A:G	rs11778798	8	141918880	G	A	0.880464	E063,7_Enh;E065,7_Enh;E069,7_Enh;E071,7_Enh;E073,7_Enh;E074,7_Enh;E081,7_Enh;E083,7_Enh;E088,7_Enh;E090,7_Enh;E100,7_Enh;E109,7_Enh	E083,7_Enh	E088;E089
81	previously not reported	PTK2	8:142006198:C:G	rs10106406	8	142006198	C	G	8:141925310:C:T	rs13254151	8	141925310	T	C	0.879308	E069,7_Enh;E108,7_Enh;E114,7_Enh;E118,7_Enh;E120,6_EnhG		E021
81	previously not reported	PTK2	8:142006198:C:G	rs10106406	8	142006198	C	G	8:141926938:A:T	rs13273095	8	141926938	T	A	0.88132	E013,6_EnhG;E018,7_Enh;E061,7_Enh;E067,7_Enh;E068,7_Enh;E069,7_Enh;E083,7_Enh;E111,7_Enh;E118,7_Enh;E120,6_EnhG	E083,7_Enh
81	previously not reported	PTK2	8:142006198:C:G	rs10106406	8	142006198	C	G	8:141930146:C:G	rs11778436	8	141930146	C	G	0.88132	E001,7_Enh;E009,7_Enh;E010,7_Enh;E011,7_Enh;E014,7_Enh;E016,7_Enh;E018,7_Enh;E019,7_Enh;E020,7_Enh;E053,7_Enh;E054,7_Enh;E061,7_Enh;E066,7_Enh;E067,7_Enh;E068,7_Enh;E072,7_Enh;E085,7_Enh;E110,7_Enh;E114,7_Enh;E118,2_TssAFlnk;E122,7_Enh
81	previously not reported	PTK2	8:142006198:C:G	rs10106406	8	142006198	C	G	8:141932462:C:T	rs13253989	8	141932462	T	C	0.880557	E001,7_Enh;E003,7_Enh;E004,7_Enh;E007,7_Enh;E009,7_Enh;E010,7_Enh;E011,7_Enh;E012,7_Enh;E013,6_EnhG;E014,7_Enh;E015,7_Enh;E016,7_Enh;E017,6_EnhG;E019,7_Enh;E020,7_Enh;E023,7_Enh;E024,7_Enh;E025,7_Enh;E027,7_Enh;E028,6_EnhG;E049,7_Enh;E052,7_Enh;E053,7_Enh;E054,7_Enh;E055,7_Enh;E059,7_Enh;E061,7_Enh;E066,7_Enh;E067,7_Enh;E068,7_Enh;E069,7_Enh;E070,7_Enh;E071,2_TssAFlnk;E072,2_TssAFlnk;E073,7_Enh;E…	E083,7_Enh;E095,7_Enh	E007;E090;E118;E122
81	previously not reported	PTK2	8:142006198:C:G	rs10106406	8	142006198	C	G	8:141933513:C:T	rs11785722	8	141933513	T	C	0.88132	E006,7_Enh;E010,7_Enh;E013,6_EnhG;E025,6_EnhG;E027,7_Enh;E028,7_Enh;E055,7_Enh;E057,7_Enh;E058,6_EnhG;E061,7_Enh;E066,7_Enh;E067,7_Enh;E068,7_Enh;E069,7_Enh;E071,7_Enh;E072,7_Enh;E074,7_Enh;E076,7_Enh;E080,7_Enh;E087,7_Enh;E095,7_Enh;E097,7_Enh;E100,7_Enh;E114,7_Enh;E118,7_Enh;E119,7_Enh;E123,7_Enh;E127,6_EnhG	E095,7_Enh	E050
81	previously not reported	PTK2	8:142006198:C:G	rs10106406	8	142006198	C	G	8:141933729:A:C	rs11781505	8	141933729	C	A	0.881106	E006,7_Enh;E010,7_Enh;E012,7_Enh;E013,6_EnhG;E023,7_Enh;E027,7_Enh;E028,7_Enh;E057,7_Enh;E058,6_EnhG;E061,7_Enh;E066,7_Enh;E067,7_Enh;E068,7_Enh;E069,7_Enh;E071,7_Enh;E072,7_Enh;E074,7_Enh;E076,7_Enh;E080,7_Enh;E087,7_Enh;E094,7_Enh;E095,7_Enh;E097,7_Enh;E100,7_Enh;E114,7_Enh;E118,7_Enh;E119,7_Enh;E123,7_Enh;E127,6_EnhG	E095,7_Enh
81	previously not reported	PTK2	8:142006198:C:G	rs10106406	8	142006198	C	G	8:141937206:C:T	rs13250232	8	141937206	T	C	0.878003	E001,7_Enh;E004,7_Enh;E013,6_EnhG;E018,7_Enh;E058,7_Enh;E087,7_Enh;E114,7_Enh;E125,6_EnhG;E127,7_Enh
81	previously not reported	PTK2	8:142006198:C:G	rs11781072	8	142006198	C	G	8:141938139:C:T		8	141938139	C	T	0.88004			E083	E083
81	previously not reported	PTK2	8:142006198:C:G	rs10106406	8	142006198	C	G	8:141939856:D:I	rs35397973	8	141939856	D	I	0.83246	E071,7_Enh;E114,7_Enh
81	previously not reported	PTK2	8:142006198:C:G	rs10106406	8	142006198	C	G	8:141941169:D:I	rs59784776	8	141941169	I	C	0.820658	E017,6_EnhG;E065,7_Enh
81	previously not reported	PTK2	8:142006198:C:G	rs10106406	8	142006198	C	G	8:141941507:C:T	rs11784127	8	141941507	C	T	0.879184	E017,7_Enh;E114,7_Enh
81	previously not reported	PTK2	8:142006198:C:G	rs10106406	8	142006198	C	G	8:141941532:C:T	rs11774672	8	141941532	T	C	0.88004	E017,7_Enh;E114,7_Enh
81	previously not reported	PTK2	8:142006198:C:G	rs10106406	8	142006198	C	G	8:141942354:C:G	rs61307926	8	141942354	C	G	0.862454	E023,7_Enh;E061,7_Enh;E063,7_Enh
81	previously not reported	PTK2	8:142006198:C:G	rs10106406	8	142006198	C	G	8:141943029:G:T	rs11167008	8	141943029	T	G	0.876057	E023,7_Enh;E050,7_Enh;E061,7_Enh;E063,7_Enh		E114
81	previously not reported	PTK2	8:142006198:C:G	rs10106406	8	142006198	C	G	8:141943073:C:G	rs11167009	8	141943073	C	G	0.845888	E023,7_Enh;E050,7_Enh;E061,7_Enh;E063,7_Enh
81	previously not reported	PTK2	8:142006198:C:G	rs10106406	8	142006198	C	G	8:141944082:C:T	rs1349081	8	141944082	T	C	0.88184	E023,7_Enh
81	previously not reported	PTK2	8:142006198:C:G	rs10106406	8	142006198	C	G	8:141944095:D:I	rs59603876	8	141944095	D	I	0.822395	E023,7_Enh
81	previously not reported	PTK2	8:142006198:C:G	rs10106406	8	142006198	C	G	8:141946474:C:T	rs13279233	8	141946474	C	T	0.880679	E104,7_Enh;E114,7_Enh	E104,7_Enh
81	previously not reported	PTK2	8:142006198:C:G	rs10106406	8	142006198	C	G	8:141946962:D:I	rs34420883	8	141946962	D	I	0.860902	E087,7_Enh;E114,7_Enh
81	previously not reported	PTK2	8:142006198:C:G	rs10106406	8	142006198	C	G	8:141947285:C:T	rs9644449	8	141947285	T	C	0.881961	E051,7_Enh;E114,7_Enh
81	previously not reported	PTK2	8:142006198:C:G	rs10106406	8	142006198	C	G	8:141948448:A:G	rs11775547	8	141948448	A	G	0.88132	E003,7_Enh;E006,7_Enh;E007,7_Enh;E013,7_Enh;E017,7_Enh;E024,7_Enh;E049,7_Enh;E059,7_Enh;E065,7_Enh;E067,7_Enh;E070,7_Enh;E083,2_TssAFlnk;E084,7_Enh;E085,7_Enh;E088,7_Enh;E090,7_Enh;E095,7_Enh;E097,7_Enh;E098,7_Enh;E102,7_Enh;E104,7_Enh;E105,7_Enh;E107,7_Enh;E114,7_Enh;E117,7_Enh;E118,7_Enh	E083,2_TssAFlnk;E095,7_Enh;E104,7_Enh;E105,7_Enh	E083;E090	E083
81	previously not reported	PTK2	8:142006198:C:G	rs10106406	8	142006198	C	G	8:141950375:A:G	rs11777476	8	141950375	A	G	0.88004	E006,7_Enh;E017,7_Enh;E052,7_Enh;E055,7_Enh;E057,7_Enh;E069,7_Enh;E114,7_Enh;E122,7_Enh;E125,7_Enh;E128,7_Enh;E129,7_Enh
81	previously not reported	PTK2	8:142006198:C:G	rs10106406	8	142006198	C	G	8:141950534:C:T	rs11774024	8	141950534	C	T	0.88004	E006,7_Enh;E017,7_Enh;E055,7_Enh;E114,7_Enh;E125,7_Enh
81	previously not reported	PTK2	8:142006198:C:G	rs10106406	8	142006198	C	G	8:141950841:C:T	rs1992889	8	141950841	T	C	0.880587	E032,7_Enh;E114,7_Enh
81	previously not reported	PTK2	8:142006198:C:G	rs10106406	8	142006198	C	G	8:141954210:A:G	rs11167010	8	141954210	G	A	0.88004	E023,7_Enh;E025,6_EnhG;E026,7_Enh;E028,6_EnhG;E031,7_Enh;E032,7_Enh;E049,7_Enh;E051,7_Enh;E052,6_EnhG;E063,7_Enh;E066,7_Enh;E068,7_Enh;E076,7_Enh;E084,7_Enh;E086,7_Enh;E087,7_Enh;E088,7_Enh;E108,7_Enh;E114,7_Enh;E118,7_Enh;E122,6_EnhG;E125,7_Enh		E021;E082;E114;E122
81	previously not reported	PTK2	8:142006198:C:G	rs10093049	8	142006198	C	G	8:141957504:C:G		8	141957504	C	G	0.88132			E086;E109
81	previously not reported	PTK2	8:142006198:C:G	rs10106406	8	142006198	C	G	8:141960578:C:T	rs2166869	8	141960578	T	C	0.88132	E003,7_Enh;E005,6_EnhG;E006,6_EnhG;E021,7_Enh;E027,7_Enh;E071,7_Enh;E073,6_EnhG;E079,7_Enh;E095,7_Enh;E096,6_EnhG;E100,7_Enh;E104,7_Enh;E105,7_Enh;E107,7_Enh;E108,7_Enh	E095,7_Enh;E104,7_Enh;E105,7_Enh
81	previously not reported	PTK2	8:142006198:C:G	rs10106406	8	142006198	C	G	8:141961177:C:T	rs13269453	8	141961177	C	T	0.877881	E071,7_Enh;E081,7_Enh;E100,7_Enh
81	previously not reported	PTK2	8:142006198:C:G	rs10106406	8	142006198	C	G	8:141961179:A:G	rs13270490	8	141961179	A	G	0.87637	E071,7_Enh;E081,7_Enh;E100,7_Enh
81	previously not reported	PTK2	8:142006198:C:G	rs10106406	8	142006198	C	G	8:141962642:C:T	rs7843337	8	141962642	T	C	0.879091	E023,7_Enh;E025,7_Enh;E035,7_Enh;E036,7_Enh;E050,7_Enh;E051,2_TssAFlnk;E069,7_Enh;E071,7_Enh;E074,7_Enh;E076,7_Enh;E088,7_Enh;E114,6_EnhG;E116,7_Enh;E118,7_Enh;E122,7_Enh		E122
81	previously not reported	PTK2	8:142006198:C:G	rs10088980	8	142006198	C	G	8:141963690:C:G		8	141963690	C	G	0.88132			E006;E017;E118;E121
81	previously not reported	PTK2	8:142006198:C:G	rs10106406	8	142006198	C	G	8:141964183:C:T	rs11782313	8	141964183	C	T	0.88004	E006,7_Enh;E017,7_Enh;E023,7_Enh;E025,7_Enh;E026,7_Enh;E032,7_Enh;E035,7_Enh;E036,7_Enh;E049,7_Enh;E050,7_Enh;E051,7_Enh;E052,7_Enh;E056,7_Enh;E096,7_Enh;E100,7_Enh;E104,7_Enh;E114,6_EnhG;E116,7_Enh;E118,7_Enh;E121,7_Enh;E122,7_Enh;E126,7_Enh;E129,7_Enh	E104,7_Enh	E021
81	previously not reported	PTK2	8:142006198:C:G	rs10092810	8	142006198	C	G	8:141965154:C:T		8	141965154	T	C	0.882604			E122
81	previously not reported	PTK2	8:142006198:C:G	rs10106406	8	142006198	C	G	8:141965397:A:G	rs11992645	8	141965397	A	G	0.882604	E017,7_Enh;E023,2_TssAFlnk;E025,2_TssAFlnk;E031,2_TssAFlnk;E032,7_Enh;E033,7_Enh;E035,7_Enh;E036,7_Enh;E039,7_Enh;E041,7_Enh;E043,7_Enh;E046,7_Enh;E048,7_Enh;E049,7_Enh;E050,2_TssAFlnk;E051,2_TssAFlnk;E052,7_Enh;E055,7_Enh;E056,7_Enh;E063,7_Enh;E071,7_Enh;E072,7_Enh;E100,7_Enh;E110,7_Enh;E114,6_EnhG;E118,7_Enh;E122,2_TssAFlnk;E123,3_TxFlnk;E125,7_Enh;E126,7_Enh;E129,7_Enh		E006;E032;E033;E034;E046;E050;E051;E122;E123;E124;E126
81	previously not reported	PTK2	8:142006198:C:G	rs10106406	8	142006198	C	G	8:141965781:G:T	rs1375062	8	141965781	G	T	0.878968	E005,7_Enh;E006,7_Enh;E017,7_Enh;E023,2_TssAFlnk;E025,2_TssAFlnk;E031,2_TssAFlnk;E032,7_Enh;E033,2_TssAFlnk;E034,7_Enh;E035,2_TssAFlnk;E036,7_Enh;E037,7_Enh;E039,7_Enh;E040,7_Enh;E041,7_Enh;E042,7_Enh;E043,7_Enh;E044,7_Enh;E046,7_Enh;E047,7_Enh;E048,7_Enh;E049,7_Enh;E050,2_TssAFlnk;E051,2_TssAFlnk;E052,2_TssAFlnk;E055,7_Enh;E056,7_Enh;E057,7_Enh;E058,7_Enh;E063,2_TssAFlnk;E068,7_Enh;E071,7_Enh;E0…		E017;E032;E050;E051;E055;E056;E057;E059;E080;E089;E093;E097;E100;E116;E120;E121;E122;E123;E124;E125;E126;E128
81	previously not reported	PTK2	8:142006198:C:G	rs10106406	8	142006198	C	G	8:141965888:A:G	rs13259836	8	141965888	A	G	0.879609	E001,7_Enh;E002,7_Enh;E005,7_Enh;E006,7_Enh;E008,7_Enh;E013,6_EnhG;E015,7_Enh;E017,7_Enh;E019,7_Enh;E020,7_Enh;E023,2_TssAFlnk;E025,2_TssAFlnk;E026,7_Enh;E027,7_Enh;E028,7_Enh;E029,12_EnhBiv;E031,2_TssAFlnk;E032,2_TssAFlnk;E033,2_TssAFlnk;E034,7_Enh;E035,2_TssAFlnk;E036,2_TssAFlnk;E037,2_TssAFlnk;E038,7_Enh;E039,7_Enh;E040,7_Enh;E041,2_TssAFlnk;E042,7_Enh;E043,7_Enh;E044,7_Enh;E045,7_Enh;E046,7_E…	E095,7_Enh;E104,7_Enh;E105,7_Enh	E029;E032;E033;E034;E046;E050;E051;E055;E056;E057;E089;E109;E114;E120;E121;E122;E123;E124;E125;E126;E128
81	previously not reported	PTK2	8:142006198:C:G	rs10106406	8	142006198	C	G	8:141967351:A:G	rs11997937	8	141967351	G	A	0.823119	E002,7_Enh;E013,6_EnhG;E015,7_Enh;E025,7_Enh;E028,7_Enh;E035,7_Enh;E049,7_Enh;E050,7_Enh;E051,7_Enh;E055,7_Enh;E057,7_Enh;E058,7_Enh;E061,7_Enh;E095,7_Enh;E100,7_Enh;E118,7_Enh;E122,7_Enh;E125,7_Enh;E126,7_Enh;E127,7_Enh;E129,7_Enh	E095,7_Enh
81	previously not reported	PTK2	8:142006198:C:G	rs10106406	8	142006198	C	G	8:141969994:A:G	rs11775885	8	141969994	G	A	0.877303	E006,6_EnhG;E096,7_Enh;E118,7_Enh		E080;E118
81	previously not reported	PTK2	8:142006198:C:G	rs10089966	8	142006198	C	G	8:141972542:A:C		8	141972542	A	C	0.878577			E021
81	previously not reported	PTK2	8:142006198:C:G	rs10106406	8	142006198	C	G	8:141973152:C:T	rs13265704	8	141973152	C	T	0.877303	E001,7_Enh;E003,7_Enh;E014,1_TssA;E015,7_Enh;E016,7_Enh;E017,7_Enh;E018,7_Enh;E019,7_Enh;E020,7_Enh;E061,7_Enh;E063,7_Enh;E065,7_Enh;E080,7_Enh;E082,7_Enh;E083,7_Enh;E095,7_Enh;E100,7_Enh;E103,7_Enh;E105,7_Enh;E111,7_Enh;E122,7_Enh	E083,7_Enh;E095,7_Enh;E105,7_Enh	E083	E083
81	previously not reported	PTK2	8:142006198:C:G	rs10106406	8	142006198	C	G	8:141974134:C:G	rs9324537	8	141974134	C	G	0.861227	E001,7_Enh;E003,7_Enh;E004,7_Enh;E005,7_Enh;E008,7_Enh;E013,7_Enh;E014,7_Enh;E015,7_Enh;E016,7_Enh;E017,7_Enh;E018,7_Enh;E019,7_Enh;E020,7_Enh;E021,7_Enh;E022,7_Enh;E024,7_Enh;E027,7_Enh;E050,7_Enh;E051,7_Enh;E055,7_Enh;E071,7_Enh;E076,7_Enh;E079,7_Enh;E083,7_Enh;E088,7_Enh;E094,7_Enh;E097,7_Enh;E100,7_Enh;E104,7_Enh;E105,7_Enh;E107,7_Enh;E108,7_Enh;E114,7_Enh;E118,7_Enh;E122,7_Enh;E123,7_Enh;E12…	E083,7_Enh;E104,7_Enh;E105,7_Enh	E021;E050;E059;E122
81	previously not reported	PTK2	8:142006198:C:G	rs10106406	8	142006198	C	G	8:141975188:A:T	rs727944	8	141975188	T	A	0.879184	E005,7_Enh;E006,7_Enh;E013,7_Enh;E014,7_Enh;E015,7_Enh;E016,7_Enh;E018,7_Enh;E081,7_Enh;E083,7_Enh;E097,7_Enh;E105,7_Enh;E114,7_Enh;E118,7_Enh;E122,7_Enh	E083,7_Enh;E105,7_Enh
81	previously not reported	PTK2	8:142006198:C:G	rs10106406	8	142006198	C	G	8:141975457:C:T	rs4440675	8	141975457	T	C	0.970863	E001,7_Enh;E004,7_Enh;E005,7_Enh;E006,7_Enh;E013,7_Enh;E015,7_Enh;E016,7_Enh;E017,7_Enh;E028,7_Enh;E049,7_Enh;E057,7_Enh;E072,7_Enh;E079,7_Enh;E081,7_Enh;E083,7_Enh;E094,7_Enh;E096,7_Enh;E097,7_Enh;E100,7_Enh;E103,7_Enh;E105,7_Enh;E107,7_Enh;E108,7_Enh;E114,7_Enh;E118,7_Enh;E122,7_Enh;E127,7_Enh;E128,7_Enh	E083,7_Enh;E105,7_Enh	E005;E083	E083
81	previously not reported	PTK2	8:142006198:C:G	rs10106406	8	142006198	C	G	8:141976150:D:I	rs5895652	8	141976150	D	I	0.88004	E001,7_Enh;E015,7_Enh;E016,7_Enh;E028,7_Enh;E057,7_Enh;E072,7_Enh;E082,7_Enh;E083,7_Enh;E097,7_Enh;E103,7_Enh;E114,7_Enh;E118,7_Enh;E122,7_Enh;E127,7_Enh	E083,7_Enh	E057
81	previously not reported	PTK2	8:142006198:C:G	rs10106406	8	142006198	C	G	8:141976738:A:G	rs9324538	8	141976738	A	G	0.88004	E016,7_Enh;E018,7_Enh;E027,7_Enh;E028,7_Enh;E049,7_Enh;E057,7_Enh;E068,7_Enh;E069,7_Enh;E072,7_Enh;E076,7_Enh;E078,7_Enh;E082,7_Enh;E083,7_Enh;E087,7_Enh;E097,7_Enh;E103,7_Enh;E107,7_Enh;E108,7_Enh;E118,7_Enh;E122,7_Enh;E127,7_Enh	E083,7_Enh
81	previously not reported	PTK2	8:142006198:C:G	rs10106406	8	142006198	C	G	8:141976997:C:T	rs9324539	8	141976997	C	T	0.878328	E002,7_Enh;E016,7_Enh;E018,7_Enh;E019,7_Enh;E020,7_Enh;E025,7_Enh;E027,7_Enh;E028,7_Enh;E049,7_Enh;E052,7_Enh;E057,7_Enh;E058,7_Enh;E068,7_Enh;E069,7_Enh;E071,7_Enh;E072,7_Enh;E076,7_Enh;E077,7_Enh;E078,7_Enh;E081,7_Enh;E082,7_Enh;E083,7_Enh;E087,7_Enh;E092,7_Enh;E097,7_Enh;E103,7_Enh;E107,7_Enh;E108,7_Enh;E111,7_Enh;E118,7_Enh;E121,7_Enh;E122,7_Enh;E125,7_Enh;E127,7_Enh	E083,7_Enh	E003;E083;E121	E083
81	previously not reported	PTK2	8:142006198:C:G	rs10106406	8	142006198	C	G	8:141977920:C:T	rs11990900	8	141977920	C	T	0.879278	E015,7_Enh;E020,7_Enh;E024,7_Enh;E025,7_Enh;E027,7_Enh;E049,7_Enh;E056,7_Enh;E057,7_Enh;E081,7_Enh;E083,7_Enh;E087,7_Enh;E118,7_Enh;E122,7_Enh	E083,7_Enh
81	previously not reported	PTK2	8:142006198:C:G	rs10106406	8	142006198	C	G	8:141980942:D:I	rs71310808	8	141980942	I	T	0.896482	E118,7_Enh
81	previously not reported	PTK2	8:142006198:C:G	rs10106406	8	142006198	C	G	8:141980988:D:I	rs71310809	8	141980988	D	I	0.81814	E118,7_Enh
81	previously not reported	PTK2	8:142006198:C:G	rs10106406	8	142006198	C	G	8:141981197:G:T	rs11774305	8	141981197	T	G	0.894324	E118,7_Enh
81	previously not reported	PTK2	8:142006198:C:G	rs10106406	8	142006198	C	G	8:141981754:C:T	rs13253978	8	141981754	T	C	0.896482	E025,7_Enh;E118,7_Enh
81	previously not reported	PTK2	8:142006198:C:G	rs10106406	8	142006198	C	G	8:141981929:A:G	rs13278775	8	141981929	G	A	0.88132	E025,7_Enh;E084,7_Enh;E118,7_Enh
81	previously not reported	PTK2	8:142006198:C:G	rs10106406	8	142006198	C	G	8:141982481:A:G	rs8180999	8	141982481	G	A	0.880587	E006,7_Enh;E066,7_Enh;E084,7_Enh;E085,7_Enh;E118,7_Enh		E021
81	previously not reported	PTK2	8:142006198:C:G	rs10106406	8	142006198	C	G	8:141982653:C:T	rs8180948	8	141982653	T	C	0.896482	E066,7_Enh;E084,7_Enh;E085,7_Enh;E118,7_Enh
81	previously not reported	PTK2	8:142006198:C:G	rs10106406	8	142006198	C	G	8:141984881:D:I	rs11786859	8	141984881	D	I	0.881818	E001,6_EnhG;E004,7_Enh;E012,7_Enh;E014,7_Enh;E016,7_Enh;E018,7_Enh;E019,7_Enh;E023,2_TssAFlnk;E025,7_Enh;E026,7_Enh;E027,7_Enh;E049,7_Enh;E052,7_Enh;E055,7_Enh;E063,7_Enh;E066,7_Enh;E069,7_Enh;E071,7_Enh;E072,7_Enh;E076,7_Enh;E077,7_Enh;E082,7_Enh;E083,7_Enh;E084,7_Enh;E085,7_Enh;E087,7_Enh;E088,7_Enh;E097,7_Enh;E102,7_Enh;E103,7_Enh;E105,7_Enh;E106,7_Enh;E108,7_Enh;E109,7_Enh;E114,7_Enh;E118,7_E…	E083,7_Enh;E105,7_Enh	E055;E081;E083;E089;E090;E097;E100;E120;E126	E083
81	previously not reported	PTK2	8:142006198:C:G	rs1031262	8	142006198	C	G	8:141985905:G:T		8	141985905	T	G	0.894042			E005;E007;E083;E085	E083
81	previously not reported	PTK2	8:142006198:C:G	rs10106406	8	142006198	C	G	8:141991081:D:I	rs71310812	8	141991081	I	G	0.88132	E085,6_EnhG
81	previously not reported	PTK2	8:142006198:C:G	rs10106406	8	142006198	C	G	8:141991440:A:T	rs11167015	8	141991440	T	A	0.867791	E006,7_Enh;E017,6_EnhG;E025,7_Enh;E072,7_Enh;E078,7_Enh;E080,6_EnhG;E083,7_Enh;E084,7_Enh;E085,6_EnhG;E094,7_Enh;E095,7_Enh;E097,7_Enh;E098,7_Enh;E103,7_Enh;E104,7_Enh;E105,7_Enh;E106,6_EnhG;E108,7_Enh;E109,7_Enh;E110,7_Enh;E114,7_Enh;E118,7_Enh	E083,7_Enh;E095,7_Enh;E104,7_Enh;E105,7_Enh	E081;E084;E085;E092;E097
81	previously not reported	PTK2	8:142006198:C:G	rs10106406	8	142006198	C	G	8:141993696:C:T	rs13276704	8	141993696	C	T	0.863685	E084,7_Enh;E085,7_Enh;E097,7_Enh;E098,7_Enh		E080;E092
81	previously not reported	PTK2	8:142006198:C:G	rs10106406	8	142006198	C	G	8:141994240:C:T	rs13258775	8	141994240	T	C	0.882604	E006,7_Enh;E017,6_EnhG;E032,7_Enh;E066,7_Enh;E084,7_Enh;E085,7_Enh;E097,7_Enh;E098,7_Enh;E102,7_Enh;E104,7_Enh;E106,7_Enh;E109,7_Enh;E110,7_Enh;E114,6_EnhG;E118,6_EnhG	E104,7_Enh	E084;E094;E098;E114
81	previously not reported	PTK2	8:142006198:C:G	rs10106406	8	142006198	C	G	8:141994272:A:C	rs13251272	8	141994272	A	C	0.882514	E006,7_Enh;E017,6_EnhG;E032,7_Enh;E066,7_Enh;E084,7_Enh;E085,7_Enh;E097,7_Enh;E098,7_Enh;E102,7_Enh;E104,7_Enh;E106,7_Enh;E109,7_Enh;E110,7_Enh;E114,6_EnhG;E118,6_EnhG	E104,7_Enh	E084;E092;E094;E098
81	previously not reported	PTK2	8:142006198:C:G	rs10106406	8	142006198	C	G	8:141994393:G:T	rs11781807	8	141994393	T	G	0.936158	E006,7_Enh;E017,6_EnhG;E032,7_Enh;E066,7_Enh;E084,7_Enh;E085,7_Enh;E097,7_Enh;E098,7_Enh;E102,7_Enh;E104,7_Enh;E106,7_Enh;E109,7_Enh;E110,7_Enh;E114,6_EnhG;E118,6_EnhG	E104,7_Enh	E022;E084;E085;E088;E092;E094;E098;E109
81	previously not reported	PTK2	8:142006198:C:G	rs10106406	8	142006198	C	G	8:141995180:A:G	rs11167016	8	141995180	A	G	0.974726	E001,7_Enh;E003,7_Enh;E005,7_Enh;E006,7_Enh;E017,6_EnhG;E018,7_Enh;E020,7_Enh;E025,7_Enh;E027,7_Enh;E028,6_EnhG;E031,7_Enh;E032,7_Enh;E052,7_Enh;E055,7_Enh;E056,6_EnhG;E057,7_Enh;E063,7_Enh;E066,7_Enh;E068,7_Enh;E071,7_Enh;E076,7_Enh;E077,12_EnhBiv;E078,7_Enh;E084,7_Enh;E085,7_Enh;E090,6_EnhG;E094,7_Enh;E095,7_Enh;E096,7_Enh;E097,7_Enh;E098,7_Enh;E100,7_Enh;E102,7_Enh;E104,7_Enh;E105,7_Enh;E106,7…	E095,7_Enh;E104,7_Enh;E105,7_Enh	E120
81	previously not reported	PTK2	8:142006198:C:G	rs10106406	8	142006198	C	G	8:141997391:C:T	rs12334399	8	141997391	C	T	0.881106	E005,7_Enh;E006,7_Enh;E013,6_EnhG;E016,7_Enh;E018,7_Enh;E026,7_Enh;E031,7_Enh;E032,7_Enh;E049,7_Enh;E052,7_Enh;E057,7_Enh;E114,7_Enh;E118,6_EnhG;E119,7_Enh;E120,7_Enh;E121,7_Enh;E122,6_EnhG;E123,6_EnhG;E125,7_Enh;E126,7_Enh;E127,7_Enh;E128,7_Enh;E129,7_Enh		E121;E128
81	previously not reported	PTK2	8:142006198:C:G	rs10106406	8	142006198	C	G	8:141998014:A:G	rs11990541	8	141998014	A	G	0.882604	E001,7_Enh;E006,7_Enh;E013,6_EnhG;E015,6_EnhG;E017,7_Enh;E019,7_Enh;E025,7_Enh;E026,7_Enh;E028,7_Enh;E032,7_Enh;E049,7_Enh;E052,7_Enh;E057,7_Enh;E058,7_Enh;E083,7_Enh;E089,6_EnhG;E091,7_Enh;E095,7_Enh;E099,7_Enh;E100,7_Enh;E114,3_TxFlnk;E117,6_EnhG;E119,7_Enh;E120,7_Enh;E121,7_Enh;E122,7_Enh;E125,7_Enh;E126,7_Enh;E127,7_Enh;E129,7_Enh	E083,7_Enh;E095,7_Enh	E004;E005;E006;E017;E028;E055;E056;E057;E083;E091;E100;E114;E117;E119;E120;E121;E125;E126;E127;E128	E083
81	previously not reported	PTK2	8:142006198:C:G	rs10106406	8	142006198	C	G	8:141999108:D:I	rs34982618	8	141999108	D	I	0.873757	E013,6_EnhG;E127,7_Enh
81	previously not reported	PTK2	8:142006198:C:G	rs10106406	8	142006198	C	G	8:142000071:C:T	rs11167017	8	142000071	C	T	0.878849	E025,7_Enh;E047,7_Enh;E068,7_Enh;E071,7_Enh;E096,7_Enh;E114,7_Enh;E119,7_Enh		E008;E022
81	previously not reported	PTK2	8:142006198:C:G	rs10106406	8	142006198	C	G	8:142000187:A:T	rs7831770	8	142000187	T	A	0.862454	E025,7_Enh;E047,7_Enh;E068,7_Enh;E071,7_Enh;E096,7_Enh;E114,7_Enh;E119,7_Enh		E123
81	previously not reported	PTK2	8:142006198:C:G	rs10106406	8	142006198	C	G	8:142001948:A:G	rs11786709	8	142001948	G	A	0.888637	E001,7_Enh;E003,7_Enh;E005,7_Enh;E006,6_EnhG;E014,7_Enh;E015,7_Enh;E016,7_Enh;E017,7_Enh;E019,7_Enh;E020,7_Enh;E022,7_Enh;E027,7_Enh;E028,7_Enh;E053,7_Enh;E054,7_Enh;E057,7_Enh;E058,7_Enh;E063,7_Enh;E067,7_Enh;E068,7_Enh;E069,7_Enh;E071,7_Enh;E073,7_Enh;E078,7_Enh;E082,7_Enh;E088,7_Enh;E089,7_Enh;E095,7_Enh;E097,7_Enh;E108,7_Enh;E114,7_Enh;E120,7_Enh;E122,6_EnhG;E127,7_Enh	E095,7_Enh	E003;E004;E005;E021;E022;E091
81	previously not reported	PTK2	8:142006198:C:G	rs10106406	8	142006198	C	G	8:142002107:C:T	rs11780104	8	142002107	C	T	0.972414	E001,7_Enh;E003,7_Enh;E005,7_Enh;E006,6_EnhG;E015,7_Enh;E017,7_Enh;E022,7_Enh;E027,7_Enh;E053,7_Enh;E054,7_Enh;E058,7_Enh;E089,7_Enh;E095,7_Enh	E095,7_Enh
81	previously not reported	PTK2	8:142006198:C:G	rs10106406	8	142006198	C	G	8:142002897:A:C	rs1397381	8	142002897	A	C	0.896482	E001,6_EnhG;E014,7_Enh;E015,6_EnhG;E061,7_Enh;E080,7_Enh;E095,7_Enh;E105,7_Enh	E095,7_Enh;E105,7_Enh	E003;E080
81	previously not reported	PTK2	8:142006198:C:G	rs10106406	8	142006198	C	G	8:142003054:C:T	rs1397380	8	142003054	T	C	0.88132	E001,6_EnhG;E014,7_Enh;E015,6_EnhG;E061,7_Enh;E080,7_Enh;E083,7_Enh;E095,7_Enh;E118,7_Enh	E083,7_Enh;E095,7_Enh
81	previously not reported	PTK2	8:142006198:C:G	rs10106406	8	142006198	C	G	8:142003311:C:T	rs11167018	8	142003311	T	C	0.88132	E014,7_Enh;E015,7_Enh;E016,6_EnhG;E061,7_Enh;E080,7_Enh;E083,7_Enh;E091,7_Enh;E095,7_Enh;E118,7_Enh	E083,7_Enh;E095,7_Enh	E091
81	previously not reported	PTK2	8:142006198:C:G	rs10106406	8	142006198	C	G	8:142004114:C:T	rs7816620	8	142004114	T	C	0.881871	E016,7_Enh;E027,7_Enh;E066,7_Enh;E091,7_Enh;E095,7_Enh;E097,7_Enh;E103,7_Enh;E118,7_Enh	E095,7_Enh
81	previously not reported	PTK2	8:142006198:C:G	rs10106406	8	142006198	C	G	8:142004193:A:G	rs7813058	8	142004193	A	G	0.862824	E016,7_Enh;E027,7_Enh;E066,7_Enh;E091,7_Enh;E095,7_Enh;E097,7_Enh;E103,7_Enh;E118,7_Enh	E095,7_Enh
81	previously not reported	PTK2	8:142006198:C:G	rs10106406	8	142006198	C	G	8:142005392:A:G	rs11784642	8	142005392	G	A	0.882604	E091,7_Enh;E118,7_Enh		E091
81	previously not reported	PTK2	8:142006198:C:G	rs10106406	8	142006198	C	G	8:142005671:C:T	rs11782305	8	142005671	T	C	0.882604	E003,7_Enh;E015,7_Enh;E019,7_Enh;E020,7_Enh;E022,7_Enh;E032,7_Enh;E072,7_Enh;E091,7_Enh;E096,7_Enh;E097,7_Enh		E004;E091;E114
81	previously not reported	PTK2	8:142006198:C:G	rs10106406	8	142006198	C	G	8:142005742:A:C	rs11781597	8	142005742	A	C	0.897799	E003,7_Enh;E015,7_Enh;E019,7_Enh;E020,7_Enh;E022,7_Enh;E032,7_Enh;E072,7_Enh;E091,7_Enh;E096,7_Enh;E097,7_Enh		E004;E091
81	previously not reported	PTK2	8:142006198:C:G	rs10106406	8	142006198	C	G	8:142006198:C:G		8	142006198	C	G	1			E091
81	previously not reported	PTK2	8:142006198:C:G	rs10106406	8	142006198	C	G	8:142007743:D:I	rs11780030	8	142007743	D	I	0.881138	E017,6_EnhG;E023,7_Enh;E025,7_Enh;E028,6_EnhG;E049,7_Enh;E052,7_Enh;E055,6_EnhG;E057,6_EnhG;E058,7_Enh;E076,7_Enh;E095,7_Enh;E097,7_Enh;E098,7_Enh;E099,7_Enh;E100,7_Enh;E114,6_EnhG;E118,7_Enh;E122,7_Enh;E123,7_Enh;E125,7_Enh;E126,7_Enh;E128,7_Enh;E129,7_Enh	E095,7_Enh	E006;E017;E056;E057;E080;E100;E114;E117;E120;E122;E123;E124;E125;E126;E127;E128
81	previously not reported	PTK2	8:142006198:C:G	rs10106406	8	142006198	C	G	8:142009527:A:G	rs11785430	8	142009527	A	G	0.973183	E001,2_TssAFlnk;E003,2_TssAFlnk;E004,7_Enh;E009,2_TssAFlnk;E010,2_TssAFlnk;E011,1_TssA;E012,1_TssA;E013,1_TssA;E014,2_TssAFlnk;E015,2_TssAFlnk;E016,2_TssAFlnk;E017,1_TssA;E018,7_Enh;E019,2_TssAFlnk;E020,2_TssAFlnk;E023,2_TssAFlnk;E024,7_Enh;E025,2_TssAFlnk;E026,2_TssAFlnk;E027,2_TssAFlnk;E028,7_Enh;E033,12_EnhBiv;E038,12_EnhBiv;E039,7_Enh;E049,2_TssAFlnk;E052,2_TssAFlnk;E053,2_TssAFlnk;E054,1_Tss…	E083,7_Enh;E104,1_TssA;E105,7_Enh	E032;E089;E090;E117;E121;E123
81	previously not reported	PTK2	8:142006198:C:G	rs10093977	8	142006198	C	G	8:142010684:A:G		8	142010684	G	A	0.875223			E005;E006;E007;E008;E017;E028;E032;E046;E050;E051;E055;E056;E057;E059;E080;E081;E082;E083;E086;E088;E089;E090;E091;E092;E093;E097;E109;E118;E119;E120;E121;E122;E125	E083
81	previously not reported	PTK2	8:142006198:C:G	rs10098028	8	142006198	C	G	8:142011053:C:G		8	142011053	C	G	0.859897			E003;E004;E005;E006;E007;E017;E028;E032;E033;E055;E057;E059;E080;E081;E083;E085;E086;E088;E089;E090;E091;E092;E097;E098;E100;E118;E119;E121;E124;E125;E127;E128	E083
81	previously not reported	PTK2	8:142006198:C:G	rs10106406	8	142006198	C	G	8:142014531:C:T	rs1806949	8	142014531	T	C	0.811502	E005,7_Enh;E008,7_Enh;E013,7_Enh;E023,7_Enh;E025,7_Enh;E026,7_Enh;E028,7_Enh;E029,12_EnhBiv;E031,7_Enh;E032,12_EnhBiv;E033,12_EnhBiv;E035,7_Enh;E036,12_EnhBiv;E041,12_EnhBiv;E043,12_EnhBiv;E049,7_Enh;E050,12_EnhBiv;E051,12_EnhBiv;E052,7_Enh;E055,7_Enh;E056,7_Enh;E057,7_Enh;E063,7_Enh;E066,7_Enh;E069,7_Enh;E071,7_Enh;E078,7_Enh;E080,7_Enh;E090,7_Enh;E091,7_Enh;E092,7_Enh;E093,12_EnhBiv;E096,7_Enh;…		E022
82	previously not reported	TRPM3	9:73482647:A:T	rs6560168	9	73482647	T	A	9:73482647:A:T	rs6560168	9	73482647	T	A	1	E027,1_TssA;E052,1_TssA;E053,2_TssAFlnk;E054,1_TssA;E086,1_TssA;E087,1_TssA
83	previously not reported	SPATA31D5P - RASEF	9:85135915:A:C	rs7043482	9	85135915	A	C	9:85134671:A:G	rs1330828	9	85134671	A	G	0.913558	E076,7_Enh;E080,7_Enh;E086,7_Enh;E088,7_Enh;E092,7_Enh;E103,7_Enh
83	previously not reported	SPATA31D5P - RASEF	9:85135915:A:C	rs7043482	9	85135915	A	C	9:85134754:A:G	rs1330829	9	85134754	A	G	0.907737	E076,7_Enh;E080,7_Enh;E086,7_Enh;E088,7_Enh;E092,7_Enh;E103,7_Enh
83	previously not reported	SPATA31D5P - RASEF	9:85135915:A:C	rs7043482	9	85135915	A	C	9:85135643:A:G	rs1330830	9	85135643	G	A	0.865951	E086,7_Enh
84	previously not reported	ASTN2	9:119314851:C:T	rs1407243	9	119314851	C	T	9:119314851:C:T	rs1407243	9	119314851	C	T	1	E025,7_Enh;E124,7_Enh
84	previously not reported	ASTN2	9:119314851:C:T	rs10759849	9	119314851	C	T	9:119328189:C:T		9	119328189	C	T	0.874064			E006;E057
85	previously not reported	PLPP7	9:134203545:C:T	rs4584185	9	134203545	C	T	9:134203545:C:T	rs4584185	9	134203545	C	T	1	E005,7_Enh;E017,7_Enh;E089,7_Enh;E091,7_Enh
86	previously not reported	BEND7	10:13534234:C:T	rs7916672	10	13534234	C	T	10:13534234:C:T	rs7916672	10	13534234	C	T	1	E070,7_Enh
86	previously not reported	BEND7	10:13534234:C:T	rs7916672	10	13534234	C	T	10:13534851:A:G	rs2251555	10	13534851	A	G	0.867935	E023,1_TssA;E025,1_TssA;E026,1_TssA;E049,1_TssA;E063,1_TssA;E066,1_TssA;E070,7_Enh;E077,1_TssA;E078,1_TssA;E097,1_TssA;E101,1_TssA;E102,1_TssA;E103,1_TssA;E117,1_TssA;E128,1_TssA;E129,1_TssA
86	previously not reported	BEND7	10:13534234:C:T	rs7916672	10	13534234	C	T	10:13535359:C:G	rs7921099	10	13535359	C	G	0.866611	E025,1_TssA;E075,1_TssA;E077,2_TssAFlnk;E097,1_TssA;E101,1_TssA;E102,1_TssA;E128,1_TssA;E129,1_TssA
86	previously not reported	BEND7	10:13534234:C:T	rs7916672	10	13534234	C	T	10:13535398:C:T	rs7921105	10	13535398	C	T	0.867361	E025,1_TssA;E075,1_TssA;E077,2_TssAFlnk;E097,1_TssA;E101,1_TssA;E102,1_TssA;E128,1_TssA;E129,1_TssA		E109
86	previously not reported	BEND7	10:13534234:C:T	rs7898153	10	13534234	C	T	10:13540500:D:I		10	13540500	D	I	0.86405			E123
86	previously not reported	BEND7	10:13534234:C:T	rs7916672	10	13534234	C	T	10:13541724:D:I	rs113234105	10	13541724	D	I	0.861281	E123,7_Enh		E098
88	previously not reported	C10orf71	10:50510406:C:T	rs10776558	10	50510406	C	T	10:50507975:A:C	rs35326339	10	50507975	C	A	0.885491	E009,7_Enh;E011,7_Enh;E012,7_Enh;E016,7_Enh;E031,7_Enh;E032,7_Enh;E035,7_Enh;E036,7_Enh;E046,7_Enh;E050,7_Enh;E051,7_Enh;E069,7_Enh;E070,7_Enh;E075,7_Enh;E077,7_Enh;E083,1_TssA;E085,12_EnhBiv;E089,2_TssAFlnk;E090,2_TssAFlnk;E091,7_Enh;E092,7_Enh;E095,2_TssAFlnk;E096,7_Enh;E098,2_TssAFlnk;E100,1_TssA;E104,1_TssA;E105,2_TssAFlnk;E106,7_Enh;E107,3_TxFlnk;E108,2_TssAFlnk;E111,12_EnhBiv;E113,7_Enh;E11…	E083,1_TssA;E095,2_TssAFlnk;E104,1_TssA;E105,2_TssAFlnk	E007;E033;E050;E081;E083;E086;E089;E100;E116;E121;E123	E083
88	previously not reported	C10orf71	10:50510406:C:T	rs10776558	10	50510406	C	T	10:50510406:C:T		10	50510406	C	T	1			E100
88	previously not reported	C10orf71	10:50510406:C:T	rs10776558	10	50510406	C	T	10:50511149:A:G	rs2377964	10	50511149	G	A	0.874042	E083,7_Enh;E090,6_EnhG;E095,7_Enh;E100,7_Enh;E104,7_Enh;E105,7_Enh;E107,3_TxFlnk;E108,3_TxFlnk;E123,7_Enh	E083,7_Enh;E095,7_Enh;E104,7_Enh;E105,7_Enh
88	previously not reported	C10orf71	10:50510406:C:T	rs10776558	10	50510406	C	T	10:50516184:C:T	rs2889802	10	50516184	C	T	0.888306	E036,7_Enh;E046,7_Enh;E107,6_EnhG;E108,6_EnhG;E115,7_Enh		E005;E022;E046;E057;E091;E116;E119
88	previously not reported	C10orf71	10:50510406:C:T	rs10776558	10	50510406	C	T	10:50517194:A:G	rs870369	10	50517194	G	A	0.831599	E029,7_Enh;E034,7_Enh;E036,7_Enh;E046,7_Enh;E047,7_Enh;E107,6_EnhG;E115,7_Enh;E123,7_Enh
88	previously not reported	C10orf71	10:50510406:C:T	rs10857465	10	50510406	C	T	10:50518351:C:T		10	50518351	C	T	0.833109			E029;E032;E033;E046;E050;E051;E089;E116;E124
88	previously not reported	C10orf71	10:50510406:C:T	rs10776558	10	50510406	C	T	10:50529643:C:T	rs7919800	10	50529643	C	T	0.814536	E107,6_EnhG;E108,6_EnhG
88	previously not reported	C10orf71	10:50510406:C:T	rs10776558	10	50510406	C	T	10:50529690:C:T	rs7908002	10	50529690	T	C	0.814373	E107,6_EnhG;E108,6_EnhG
89	previously not reported	TMEM26	10:63194576:A:G	rs74813029	10	63194576	G	A	10:63167262:C:T	rs2139779	10	63167262	T	C	0.927273	E003,7_Enh;E004,7_Enh;E014,7_Enh;E019,7_Enh;E020,7_Enh;E021,7_Enh;E061,7_Enh;E066,7_Enh;E086,7_Enh;E088,2_TssAFlnk;E092,7_Enh;E115,7_Enh;E121,7_Enh;E126,7_Enh
89	previously not reported	TMEM26	10:63194576:A:G	rs17274653	10	63194576	G	A	10:63229696:C:T		10	63229696	C	T	0.965987			E086
89	previously not reported	TMEM26	10:63194576:A:G	rs72827253	10	63194576	G	A	10:63230568:C:T		10	63230568	C	T	0.965987			E090
89	previously not reported	TMEM26	10:63194576:A:G	rs74813029	10	63194576	G	A	10:63239304:A:G	rs7923758	10	63239304	A	G	0.932178	E019,7_Enh		E021
89	previously not reported	TMEM26	10:63194576:A:G	rs74813029	10	63194576	G	A	10:63240354:A:G	rs72827262	10	63240354	A	G	0.945425	E014,7_Enh;E019,7_Enh;E126,7_Enh
90	previously not reported	COL13A1	10:71559723:C:T	rs2642608	10	71559723	C	T	10:71558516:A:G	rs3104052	10	71558516	G	A	0.966091	E065,7_Enh;E093,7_Enh;E127,7_Enh
90	previously not reported	COL13A1	10:71559723:C:T	rs2642608	10	71559723	C	T	10:71558697:A:C	rs3108966	10	71558697	C	A	0.88463	E093,7_Enh;E127,7_Enh
90	previously not reported	COL13A1	10:71559723:C:T	rs2642608	10	71559723	C	T	10:71559089:A:G	rs2642609	10	71559089	G	A	0.965995	E093,7_Enh		E093
90	previously not reported	COL13A1	10:71559723:C:T	rs2642608	10	71559723	C	T	10:71559723:C:T	rs2642608	10	71559723	C	T	1	E001,7_Enh;E002,7_Enh;E004,7_Enh;E008,7_Enh;E013,7_Enh;E014,7_Enh;E015,7_Enh;E017,7_Enh;E018,12_EnhBiv;E019,12_EnhBiv;E020,7_Enh;E021,7_Enh;E022,7_Enh;E024,7_Enh;E085,7_Enh;E092,12_EnhBiv;E093,12_EnhBiv;E114,7_Enh		E004;E008;E022;E092;E119
90	previously not reported	COL13A1	10:71559723:C:T	rs2642608	10	71559723	C	T	10:71560033:C:T	rs2704506	10	71560033	C	T	0.906709	E002,7_Enh;E003,12_EnhBiv;E004,7_Enh;E008,7_Enh;E011,7_Enh;E013,7_Enh;E014,7_Enh;E015,7_Enh;E017,7_Enh;E018,12_EnhBiv;E019,12_EnhBiv;E020,7_Enh;E021,7_Enh;E024,7_Enh;E055,7_Enh;E066,7_Enh;E092,12_EnhBiv;E093,12_EnhBiv;E122,7_Enh		E003;E004;E006;E007;E008;E017;E021;E022;E028;E029;E032;E034;E046;E050;E051;E055;E056;E057;E059;E080;E081;E082;E083;E084;E085;E086;E088;E089;E090;E091;E092;E093;E094;E097;E098;E100;E109;E114;E116;E117;E118;E119;E120;E121;E122;E123;E124;E125;E126;E127;E128	E083
90	previously not reported	COL13A1	10:71559723:C:T	rs2642608	10	71559723	C	T	10:71560956:A:C	rs3108965	10	71560956	C	A	0.835723	E003,11_BivFlnk;E004,2_TssAFlnk;E006,7_Enh;E008,2_TssAFlnk;E011,1_TssA;E013,7_Enh;E014,2_TssAFlnk;E015,2_TssAFlnk;E016,1_TssA;E017,7_Enh;E018,12_EnhBiv;E019,11_BivFlnk;E020,12_EnhBiv;E021,7_Enh;E022,7_Enh;E024,7_Enh;E025,7_Enh;E028,7_Enh;E046,12_EnhBiv;E055,7_Enh;E056,7_Enh;E057,7_Enh;E083,7_Enh;E088,12_EnhBiv;E090,12_EnhBiv;E091,12_EnhBiv;E092,12_EnhBiv;E093,12_EnhBiv;E104,7_Enh;E105,7_Enh;E107,…	E083,7_Enh;E104,7_Enh;E105,7_Enh	E003;E004;E006;E007;E008;E022;E028;E050;E057;E059;E083;E091;E093;E100;E114;E126;E127;E128	E083
90	previously not reported	COL13A1	10:71559723:C:T	rs2642608	10	71559723	C	T	10:71563758:C:G	rs2642604	10	71563758	G	C	0.840238	E001,12_EnhBiv;E003,12_EnhBiv;E004,1_TssA;E006,3_TxFlnk;E009,12_EnhBiv;E013,2_TssAFlnk;E015,11_BivFlnk;E017,2_TssAFlnk;E018,12_EnhBiv;E020,12_EnhBiv;E021,12_EnhBiv;E022,12_EnhBiv;E024,12_EnhBiv;E025,2_TssAFlnk;E027,7_Enh;E028,7_Enh;E055,2_TssAFlnk;E056,2_TssAFlnk;E057,7_Enh;E065,7_Enh;E078,1_TssA;E079,7_Enh;E083,7_Enh;E088,11_BivFlnk;E089,12_EnhBiv;E090,12_EnhBiv;E092,11_BivFlnk;E098,7_Enh;E100,1…	E083,7_Enh	E017;E055;E056;E083;E088;E093;E121;E126	E083
90	previously not reported	COL13A1	10:71559723:C:T	rs2642608	10	71559723	C	T	10:71564500:C:T	rs2704503	10	71564500	C	T	0.910278	E004,7_Enh;E017,7_Enh;E024,7_Enh;E055,7_Enh;E056,7_Enh;E088,7_Enh;E092,7_Enh;E122,2_TssAFlnk
91	previously not reported	ZMIZ1	10:80898969:G:T	rs1769758	10	80898969	G	T	10:80897384:C:T	rs704000	10	80897384	C	T	0.898196	E001,7_Enh;E002,7_Enh;E003,7_Enh;E005,6_EnhG;E006,7_Enh;E007,7_Enh;E009,7_Enh;E011,7_Enh;E012,7_Enh;E013,7_Enh;E015,7_Enh;E016,7_Enh;E017,7_Enh;E019,7_Enh;E020,7_Enh;E021,7_Enh;E022,7_Enh;E023,7_Enh;E025,7_Enh;E026,7_Enh;E029,7_Enh;E030,7_Enh;E031,7_Enh;E032,12_EnhBiv;E033,7_Enh;E034,7_Enh;E035,2_TssAFlnk;E036,2_TssAFlnk;E037,7_Enh;E038,7_Enh;E039,2_TssAFlnk;E040,7_Enh;E041,2_TssAFlnk;E042,7_Enh;…	E083,7_Enh;E095,7_Enh;E104,7_Enh;E105,7_Enh	E006;E017;E022;E029;E050;E051;E055;E056;E083;E086;E089;E092;E093;E097;E100;E116;E120;E121;E122;E125;E128	E083
91	previously not reported	ZMIZ1	10:80898969:G:T	rs1769758	10	80898969	G	T	10:80897515:A:G	rs779671	10	80897515	G	A	0.948962	E001,7_Enh;E002,7_Enh;E003,7_Enh;E005,6_EnhG;E006,7_Enh;E007,7_Enh;E009,7_Enh;E011,7_Enh;E012,7_Enh;E013,7_Enh;E015,7_Enh;E016,7_Enh;E017,7_Enh;E022,7_Enh;E023,7_Enh;E024,7_Enh;E025,7_Enh;E026,7_Enh;E029,7_Enh;E030,7_Enh;E031,7_Enh;E032,12_EnhBiv;E033,2_TssAFlnk;E034,2_TssAFlnk;E035,2_TssAFlnk;E036,2_TssAFlnk;E037,7_Enh;E038,2_TssAFlnk;E039,2_TssAFlnk;E040,7_Enh;E041,2_TssAFlnk;E042,2_TssAFlnk;E0…	E083,7_Enh;E095,7_Enh;E104,7_Enh;E105,7_Enh	E003;E006;E046;E050;E051;E083;E089;E090;E092;E093;E100;E121;E125	E083
91	previously not reported	ZMIZ1	10:80898969:G:T	rs1769758	10	80898969	G	T	10:80898969:G:T	rs1769758	10	80898969	G	T	1	E011,7_Enh;E012,7_Enh;E013,7_Enh;E015,7_Enh;E017,7_Enh;E022,7_Enh;E023,7_Enh;E025,7_Enh;E026,7_Enh;E029,7_Enh;E030,7_Enh;E031,7_Enh;E032,7_Enh;E034,7_Enh;E035,7_Enh;E036,6_EnhG;E039,7_Enh;E042,7_Enh;E043,7_Enh;E046,7_Enh;E047,7_Enh;E049,7_Enh;E050,2_TssAFlnk;E051,2_TssAFlnk;E052,7_Enh;E055,6_EnhG;E056,6_EnhG;E059,7_Enh;E061,6_EnhG;E063,2_TssAFlnk;E067,7_Enh;E069,7_Enh;E070,7_Enh;E071,7_Enh;E074,7…	E083,7_Enh;E095,7_Enh;E104,7_Enh;E105,7_Enh	E006;E007;E017;E029;E055;E056;E059;E083;E084;E085;E086;E088;E089;E090;E091;E092;E093;E094;E097;E098;E100;E120;E121;E122;E123;E124;E125;E126;E128	E083
91	previously not reported	ZMIZ1	10:81178171:C:T	rs10824756	10	81178171	T	C	10:81178171:C:T		10	81178171	T	C	1			E080;E100;E114
91	previously not reported	ZMIZ1	10:81178171:C:T	rs10824757	10	81178171	T	C	10:81180767:C:T		10	81180767	C	T	0.98042			E083;E089	E083
91	previously not reported	ZMIZ1	10:81178171:C:T	rs10824756	10	81178171	T	C	10:81180962:C:T	rs11002969	10	81180962	C	T	0.97649	E003,7_Enh;E005,2_TssAFlnk;E006,6_EnhG;E017,6_EnhG;E022,7_Enh;E023,7_Enh;E025,7_Enh;E026,7_Enh;E027,6_EnhG;E029,7_Enh;E052,7_Enh;E053,6_EnhG;E054,6_EnhG;E055,6_EnhG;E056,7_Enh;E063,7_Enh;E066,7_Enh;E067,7_Enh;E068,7_Enh;E069,6_EnhG;E071,3_TxFlnk;E072,6_EnhG;E073,6_EnhG;E074,7_Enh;E076,7_Enh;E078,7_Enh;E079,7_Enh;E082,7_Enh;E083,7_Enh;E088,7_Enh;E089,6_EnhG;E090,7_Enh;E091,7_Enh;E092,6_EnhG;E094,7…	E083,7_Enh;E095,7_Enh;E104,7_Enh;E105,7_Enh	E007;E017;E051;E056;E081;E082;E083;E088;E089;E090;E120;E121;E125;E126;E128	E083
91	previously not reported	ZMIZ1	10:81178171:C:T	rs10824756	10	81178171	T	C	10:81181099:C:T	rs11598912	10	81181099	C	T	0.97649	E005,1_TssA;E006,6_EnhG;E017,6_EnhG;E023,7_Enh;E025,7_Enh;E026,7_Enh;E027,6_EnhG;E029,7_Enh;E049,7_Enh;E052,7_Enh;E053,6_EnhG;E054,6_EnhG;E055,6_EnhG;E056,7_Enh;E059,6_EnhG;E063,7_Enh;E066,7_Enh;E067,7_Enh;E068,7_Enh;E069,6_EnhG;E071,3_TxFlnk;E072,6_EnhG;E073,6_EnhG;E074,7_Enh;E076,7_Enh;E078,7_Enh;E079,7_Enh;E081,7_Enh;E082,7_Enh;E083,7_Enh;E088,7_Enh;E089,7_Enh;E090,7_Enh;E091,7_Enh;E092,6_EnhG…	E083,7_Enh;E095,7_Enh;E104,7_Enh;E105,7_Enh	E055;E083;E089;E090	E083
91	previously not reported	ZMIZ1	10:81178171:C:T	rs10824756	10	81178171	T	C	10:81182802:A:G	rs12360384	10	81182802	G	A	0.97649	E006,6_EnhG;E017,6_EnhG;E023,2_TssAFlnk;E025,6_EnhG;E026,7_Enh;E027,7_Enh;E049,6_EnhG;E052,7_Enh;E055,6_EnhG;E056,7_Enh;E059,6_EnhG;E063,7_Enh;E066,2_TssAFlnk;E067,7_Enh;E068,7_Enh;E069,6_EnhG;E071,6_EnhG;E072,6_EnhG;E074,7_Enh;E076,7_Enh;E083,7_Enh;E088,7_Enh;E089,6_EnhG;E090,6_EnhG;E092,6_EnhG;E097,7_Enh;E100,7_Enh;E107,7_Enh;E108,7_Enh;E111,6_EnhG;E118,7_Enh;E121,7_Enh;E126,6_EnhG;E128,6_EnhG;…	E083,7_Enh	E093;E097
91	previously not reported	ZMIZ1	10:81178171:C:T	rs10824756	10	81178171	T	C	10:81183428:A:G	rs71493603	10	81183428	A	G	0.946079	E055,6_EnhG;E066,1_TssA;E089,6_EnhG;E090,6_EnhG;E107,7_Enh;E108,7_Enh;E118,7_Enh
91	previously not reported	ZMIZ1	10:81178171:C:T	rs10824756	10	81178171	T	C	10:81184520:C:T	rs11592083	10	81184520	C	T	0.911393	E006,6_EnhG;E013,6_EnhG;E017,6_EnhG;E023,6_EnhG;E025,6_EnhG;E026,6_EnhG;E027,6_EnhG;E049,6_EnhG;E052,6_EnhG;E055,6_EnhG;E056,3_TxFlnk;E059,6_EnhG;E063,6_EnhG;E066,7_Enh;E067,7_Enh;E068,6_EnhG;E069,6_EnhG;E071,6_EnhG;E072,6_EnhG;E073,6_EnhG;E074,6_EnhG;E075,7_Enh;E076,6_EnhG;E077,7_Enh;E078,7_Enh;E083,7_Enh;E084,7_Enh;E085,6_EnhG;E088,6_EnhG;E089,6_EnhG;E090,6_EnhG;E091,7_Enh;E092,6_EnhG;E094,6_En…	E083,7_Enh;E095,7_Enh;E104,7_Enh;E105,7_Enh	E017;E055;E083;E084;E085;E086;E088;E089;E090;E092;E093;E094;E097;E098;E100;E109;E118;E121;E123;E125	E083
91	previously not reported	ZMIZ1	10:81178171:C:T	rs10824756	10	81178171	T	C	10:81186077:C:T	rs11002976	10	81186077	C	T	0.934463	E017,6_EnhG;E068,6_EnhG;E071,6_EnhG;E073,6_EnhG;E074,6_EnhG;E076,6_EnhG;E078,7_Enh;E083,7_Enh;E089,6_EnhG;E090,6_EnhG;E103,7_Enh;E111,6_EnhG	E083,7_Enh
91	previously not reported	ZMIZ1	10:81178171:C:T	rs10824756	10	81178171	T	C	10:81186229:A:C	rs11002978	10	81186229	C	A	0.934463	E068,6_EnhG;E076,6_EnhG;E078,7_Enh;E083,7_Enh;E103,7_Enh;E111,6_EnhG	E083,7_Enh
92	previously not reported	U3	10:88509088:A:T	rs117443987	10	88509088	T	A	10:88480992:A:G	rs4934253	10	88480992	G	A	0.900978	E004,7_Enh;E083,6_EnhG;E107,6_EnhG;E108,6_EnhG;E123,7_Enh	E083,6_EnhG
92	previously not reported	U3	10:88509088:A:T	rs117443987	10	88509088	T	A	10:88486374:A:G	rs17335168	10	88486374	A	G	0.887305	E077,7_Enh;E083,6_EnhG;E084,7_Enh;E085,7_Enh;E089,6_EnhG;E090,6_EnhG;E094,7_Enh;E095,6_EnhG;E098,7_Enh;E107,6_EnhG;E108,6_EnhG;E109,7_Enh;E118,7_Enh	E083,6_EnhG;E095,6_EnhG	E083;E088	E083
92	previously not reported	U3	10:88509088:A:T	rs117443987	10	88509088	T	A	10:88487754:A:G	rs17335189	10	88487754	A	G	0.92413	E005,7_Enh;E023,7_Enh;E063,7_Enh;E076,7_Enh;E083,6_EnhG;E084,7_Enh;E085,7_Enh;E086,7_Enh;E090,6_EnhG;E107,6_EnhG;E108,6_EnhG;E118,7_Enh	E083,6_EnhG
92	previously not reported	U3	10:88509088:A:T	rs117443987	10	88509088	T	A	10:88489575:C:T	rs111599968	10	88489575	C	T	0.92413	E005,7_Enh;E006,7_Enh;E066,7_Enh;E072,7_Enh;E074,7_Enh;E076,7_Enh;E083,6_EnhG;E089,6_EnhG;E090,6_EnhG;E095,6_EnhG;E103,7_Enh;E104,7_Enh;E105,6_EnhG;E107,6_EnhG;E108,6_EnhG;E111,6_EnhG	E083,6_EnhG;E095,6_EnhG;E104,7_Enh;E105,6_EnhG	E028;E083;E091;E118;E121	E083
92	previously not reported	U3	10:88509088:A:T	rs117443987	10	88509088	T	A	10:88494474:A:G	rs45468798	10	88494474	G	A	0.92413	E001,7_Enh;E015,7_Enh;E022,7_Enh;E027,7_Enh;E053,7_Enh;E054,7_Enh;E067,7_Enh;E073,7_Enh;E076,7_Enh;E078,7_Enh;E081,7_Enh;E083,6_EnhG;E085,7_Enh;E089,12_EnhBiv;E090,6_EnhG;E092,7_Enh;E095,6_EnhG;E097,7_Enh;E103,7_Enh;E104,7_Enh;E105,7_Enh;E107,6_EnhG;E108,6_EnhG;E111,7_Enh;E116,7_Enh;E121,6_EnhG;E123,7_Enh	E083,6_EnhG;E095,6_EnhG;E104,7_Enh;E105,7_Enh	E022;E083	E083
92	previously not reported	U3	10:88509088:A:T	rs117443987	10	88509088	T	A	10:88506903:C:T	rs112821441	10	88506903	T	C	1	E053,7_Enh;E092,7_Enh
92	previously not reported	U3	10:88509088:A:T	rs117443987	10	88509088	T	A	10:88511364:A:G	rs113493405	10	88511364	A	G	0.981213	E018,7_Enh;E102,7_Enh;E105,7_Enh;E106,7_Enh;E117,7_Enh	E105,7_Enh	E032;E033;E116;E127
92	previously not reported	U3	10:88509088:A:T	rs117443987	10	88509088	T	A	10:88511551:D:I	rs138950259	10	88511551	I	C	0.839081	E006,6_EnhG;E094,7_Enh;E098,7_Enh;E101,7_Enh;E102,7_Enh;E105,7_Enh;E106,7_Enh;E123,7_Enh	E105,7_Enh
92	previously not reported	U3	10:88509088:A:T	rs117443987	10	88509088	T	A	10:88515032:D:I	rs147459700	10	88515032	D	I	0.981213	E001,1_TssA;E002,1_TssA;E003,1_TssA;E004,1_TssA;E008,1_TssA;E009,1_TssA;E010,1_TssA;E011,1_TssA;E012,2_TssAFlnk;E013,1_TssA;E014,2_TssAFlnk;E015,1_TssA;E016,2_TssAFlnk;E017,1_TssA;E018,1_TssA;E019,1_TssA;E020,1_TssA;E021,1_TssA;E023,2_TssAFlnk;E024,1_TssA;E025,1_TssA;E026,2_TssAFlnk;E027,7_Enh;E028,2_TssAFlnk;E032,12_EnhBiv;E038,7_Enh;E041,7_Enh;E042,7_Enh;E043,7_Enh;E048,7_Enh;E049,2_TssAFlnk;E0…	E083,2_TssAFlnk	E003;E008;E034;E083;E088;E092	E083
92	previously not reported	U3	10:88509088:A:T	rs117443987	10	88509088	T	A	10:88518996:C:T	rs80299163	10	88518996	C	T	0.805995	E001,1_TssA;E002,1_TssA;E003,1_TssA;E004,1_TssA;E008,1_TssA;E009,1_TssA;E010,1_TssA;E011,1_TssA;E012,1_TssA;E013,1_TssA;E014,1_TssA;E015,1_TssA;E016,1_TssA;E017,1_TssA;E018,1_TssA;E019,1_TssA;E020,1_TssA;E021,1_TssA;E022,1_TssA;E023,1_TssA;E024,1_TssA;E025,2_TssAFlnk;E026,2_TssAFlnk;E027,1_TssA;E028,2_TssAFlnk;E029,12_EnhBiv;E032,12_EnhBiv;E037,7_Enh;E040,7_Enh;E043,7_Enh;E045,7_Enh;E049,2_TssAFl…	E083,7_Enh;E104,1_TssA;E105,1_TssA	E003;E021;E032;E080;E084;E090;E097;E116;E118;E123;E124
92	previously not reported	U3	10:88509088:A:T	rs117443987	10	88509088	T	A	10:88523810:A:G	rs113337982	10	88523810	A	G	0.805995	E001,7_Enh;E076,7_Enh;E097,7_Enh
92	previously not reported	U3	10:88509088:A:T	rs117443987	10	88509088	T	A	10:88526921:A:C	rs17231968	10	88526921	A	C	0.805995	E001,7_Enh;E003,7_Enh;E014,7_Enh;E016,7_Enh;E018,7_Enh;E019,7_Enh;E022,7_Enh;E068,7_Enh;E081,7_Enh
92	previously not reported	U3	10:88509088:A:T	rs117443987	10	88509088	T	A	10:88531140:A:C	rs112569535	10	88531140	A	C	0.812545	E001,7_Enh;E014,7_Enh;E016,7_Enh;E018,7_Enh;E019,7_Enh;E065,7_Enh;E076,7_Enh;E111,7_Enh;E116,7_Enh;E123,7_Enh
92	previously not reported	U3	10:88509088:A:T	rs117443987	10	88509088	T	A	10:88532176:C:T	rs111678403	10	88532176	C	T	0.812545	E016,7_Enh;E017,7_Enh;E076,7_Enh;E078,1_TssA;E095,7_Enh;E097,1_TssA;E107,7_Enh;E116,7_Enh;E123,7_Enh	E095,7_Enh	E123
92	previously not reported	U3	10:88509088:A:T	rs117443987	10	88509088	T	A	10:88535494:D:I	rs140527703	10	88535494	I	C	0.812545	E001,7_Enh;E003,7_Enh;E004,7_Enh;E005,7_Enh;E009,7_Enh;E010,7_Enh;E011,7_Enh;E012,7_Enh;E013,7_Enh;E014,7_Enh;E015,7_Enh;E016,7_Enh;E017,7_Enh;E018,7_Enh;E019,7_Enh;E020,7_Enh;E021,7_Enh;E023,7_Enh;E024,7_Enh;E025,7_Enh;E026,7_Enh;E027,7_Enh;E028,7_Enh;E049,7_Enh;E052,7_Enh;E053,7_Enh;E054,7_Enh;E055,7_Enh;E056,7_Enh;E058,7_Enh;E061,7_Enh;E065,7_Enh;E066,7_Enh;E067,7_Enh;E068,7_Enh;E069,7_Enh;E07…	E083,7_Enh;E095,7_Enh;E104,7_Enh;E105,7_Enh	E004;E006;E017;E059;E080;E081;E082;E086;E088;E089;E090;E097
92	previously not reported	U3	10:88509088:A:T	rs117443987	10	88509088	T	A	10:88536955:A:G	rs79494763	10	88536955	A	G	0.805995	E071,7_Enh;E076,7_Enh;E104,7_Enh;E123,7_Enh	E104,7_Enh
93	previously not reported	ADRB1	10:115782061:A:G	rs67234920	10	115782061	G	A	10:115781902:G:T	rs12771397	10	115781902	G	T	0.91675	E013,7_Enh;E023,12_EnhBiv;E053,2_TssAFlnk;E054,2_TssAFlnk;E063,7_Enh;E068,7_Enh;E069,7_Enh;E070,7_Enh;E071,7_Enh;E072,7_Enh;E073,7_Enh;E074,7_Enh;E082,7_Enh;E083,7_Enh;E088,7_Enh;E097,7_Enh	E083,7_Enh	E089;E090
93	previously not reported	ADRB1	10:115782061:A:G	rs67234920	10	115782061	G	A	10:115782061:A:G	rs67234920	10	115782061	G	A	1	E013,7_Enh;E023,2_TssAFlnk;E025,10_TssBiv;E053,2_TssAFlnk;E054,2_TssAFlnk;E063,2_TssAFlnk;E068,2_TssAFlnk;E069,7_Enh;E070,7_Enh;E071,2_TssAFlnk;E072,7_Enh;E073,7_Enh;E074,7_Enh;E082,7_Enh;E083,2_TssAFlnk;E088,7_Enh;E097,7_Enh;E108,7_Enh;E121,7_Enh	E083,2_TssAFlnk	E082;E083;E089;E090;E123	E083
93	previously not reported	ADRB1	10:115782061:A:G	rs10490905	10	115782061	G	A	10:115782271:A:G		10	115782271	A	G	0.993009			E006;E017;E055;E056;E081;E082;E083;E086;E088;E089;E090;E092;E097;E100;E123;E126	E083
93	previously not reported	ADRB1	10:115782061:A:G	rs67234920	10	115782061	G	A	10:115782367:C:T	rs77768243	10	115782367	T	C	0.994411	E006,7_Enh;E013,7_Enh;E023,12_EnhBiv;E025,10_TssBiv;E053,2_TssAFlnk;E054,2_TssAFlnk;E063,2_TssAFlnk;E067,7_Enh;E068,2_TssAFlnk;E069,7_Enh;E070,7_Enh;E071,2_TssAFlnk;E072,7_Enh;E073,7_Enh;E074,7_Enh;E082,7_Enh;E083,2_TssAFlnk;E088,7_Enh;E090,12_EnhBiv;E095,7_Enh;E097,7_Enh;E103,7_Enh;E105,7_Enh;E107,7_Enh;E108,7_Enh;E123,7_Enh;E127,7_Enh	E083,2_TssAFlnk;E095,7_Enh;E105,7_Enh	E006;E051;E056;E081;E083;E086;E088;E089;E090;E098;E100;E123;E126	E083
93	previously not reported	ADRB1	10:115782061:A:G	rs67234920	10	115782061	G	A	10:115782368:A:G	rs77334369	10	115782368	G	A	0.993017	E006,7_Enh;E013,7_Enh;E023,12_EnhBiv;E025,10_TssBiv;E053,2_TssAFlnk;E054,2_TssAFlnk;E063,2_TssAFlnk;E067,7_Enh;E068,2_TssAFlnk;E069,7_Enh;E070,7_Enh;E071,2_TssAFlnk;E072,7_Enh;E073,7_Enh;E074,7_Enh;E082,7_Enh;E083,2_TssAFlnk;E088,7_Enh;E090,12_EnhBiv;E095,7_Enh;E097,7_Enh;E103,7_Enh;E105,7_Enh;E107,7_Enh;E108,7_Enh;E123,7_Enh;E127,7_Enh	E083,2_TssAFlnk;E095,7_Enh;E105,7_Enh	E006;E051;E056;E081;E083;E086;E088;E089;E090;E098;E100;E123;E126	E083
93	previously not reported	ADRB1	10:115782061:A:G	rs67234920	10	115782061	G	A	10:115782424:C:G	rs67728379	10	115782424	C	G	0.994411	E023,2_TssAFlnk;E025,12_EnhBiv;E049,7_Enh;E053,2_TssAFlnk;E054,2_TssAFlnk;E063,7_Enh;E067,7_Enh;E068,7_Enh;E069,7_Enh;E070,7_Enh;E071,7_Enh;E072,7_Enh;E073,7_Enh;E074,7_Enh;E082,7_Enh;E083,2_TssAFlnk;E088,7_Enh;E091,7_Enh;E095,7_Enh;E097,7_Enh;E103,7_Enh;E105,7_Enh;E107,7_Enh;E108,7_Enh;E123,7_Enh	E083,2_TssAFlnk;E095,7_Enh;E105,7_Enh	E083;E088;E089;E090	E083
93	previously not reported	ADRB1	10:115782061:A:G	rs67234920	10	115782061	G	A	10:115783466:C:T	rs7069673	10	115783466	T	C	0.993009	E028,7_Enh;E029,7_Enh;E031,7_Enh;E053,7_Enh;E054,7_Enh;E061,7_Enh;E063,7_Enh;E083,7_Enh;E119,7_Enh;E124,7_Enh;E127,7_Enh	E083,7_Enh
93	previously not reported	ADRB1	10:115782061:A:G	rs67234920	10	115782061	G	A	10:115783832:C:T	rs7070157	10	115783832	T	C	0.994411	E028,7_Enh;E029,7_Enh;E030,7_Enh;E031,7_Enh;E032,7_Enh;E036,7_Enh;E041,7_Enh;E051,7_Enh;E053,7_Enh;E057,7_Enh;E058,7_Enh;E063,7_Enh;E083,7_Enh;E115,7_Enh;E116,7_Enh;E119,7_Enh;E124,7_Enh;E127,7_Enh	E083,7_Enh
93	previously not reported	ADRB1	10:115782061:A:G	rs67234920	10	115782061	G	A	10:115783950:A:G	rs11196593	10	115783950	G	A	0.983242	E028,7_Enh;E029,7_Enh;E030,7_Enh;E031,7_Enh;E032,7_Enh;E036,7_Enh;E041,7_Enh;E051,7_Enh;E053,7_Enh;E057,7_Enh;E058,7_Enh;E063,7_Enh;E083,7_Enh;E115,7_Enh;E116,7_Enh;E119,7_Enh;E124,7_Enh;E127,7_Enh	E083,7_Enh
94	previously not reported	FGFR2	10:123348662:G:T	rs2912774	10	123348662	T	G	10:123346116:A:G	rs2981575	10	123346116	G	A	0.941351	E014,6_EnhG;E018,7_Enh;E019,6_EnhG;E027,6_EnhG;E058,7_Enh;E067,7_Enh;E068,7_Enh;E071,7_Enh;E074,7_Enh;E076,7_Enh;E080,7_Enh;E103,7_Enh;E127,7_Enh
94	previously not reported	FGFR2	10:123348662:G:T	rs2912774	10	123348662	T	G	10:123348662:G:T	rs2912774	10	123348662	T	G	1	E016,6_EnhG;E027,7_Enh;E049,7_Enh;E057,1_TssA;E058,2_TssAFlnk;E066,7_Enh;E067,7_Enh;E069,7_Enh;E070,7_Enh;E071,7_Enh;E074,7_Enh;E076,7_Enh;E088,7_Enh;E092,7_Enh;E127,2_TssAFlnk		E088
94	previously not reported	FGFR2	10:123348662:G:T	rs2912774	10	123348662	T	G	10:123348902:C:T	rs2936870	10	123348902	T	C	0.981413	E014,6_EnhG;E016,6_EnhG;E019,6_EnhG;E027,2_TssAFlnk;E049,7_Enh;E057,1_TssA;E058,1_TssA;E066,7_Enh;E067,7_Enh;E069,7_Enh;E070,7_Enh;E071,7_Enh;E074,7_Enh;E076,7_Enh;E081,7_Enh;E088,7_Enh;E092,7_Enh;E127,2_TssAFlnk
94	previously not reported	FGFR2	10:123348662:G:T	rs2912774	10	123348662	T	G	10:123350216:A:C	rs2981584	10	123350216	A	C	0.970457	E003,6_EnhG;E004,7_Enh;E009,7_Enh;E011,12_EnhBiv;E014,6_EnhG;E015,6_EnhG;E016,6_EnhG;E018,7_Enh;E019,6_EnhG;E020,6_EnhG;E024,6_EnhG;E027,7_Enh;E051,7_Enh;E057,2_TssAFlnk;E058,7_Enh;E066,7_Enh;E068,7_Enh;E069,7_Enh;E070,7_Enh;E071,7_Enh;E072,7_Enh;E074,7_Enh;E080,7_Enh;E081,7_Enh;E088,7_Enh;E092,7_Enh;E103,7_Enh;E110,7_Enh;E127,7_Enh		E080
94	previously not reported	FGFR2	10:123348662:G:T	rs2912774	10	123348662	T	G	10:123350523:A:G	rs2981583	10	123350523	A	G	0.846593	E001,7_Enh;E003,6_EnhG;E004,7_Enh;E008,7_Enh;E009,7_Enh;E010,6_EnhG;E014,6_EnhG;E015,6_EnhG;E016,6_EnhG;E018,7_Enh;E019,6_EnhG;E020,6_EnhG;E021,7_Enh;E022,7_Enh;E024,6_EnhG;E027,2_TssAFlnk;E051,7_Enh;E057,2_TssAFlnk;E058,7_Enh;E068,7_Enh;E069,7_Enh;E070,7_Enh;E071,7_Enh;E072,7_Enh;E074,7_Enh;E080,7_Enh;E081,7_Enh;E086,7_Enh;E088,7_Enh;E097,7_Enh;E103,7_Enh;E110,7_Enh;E127,2_TssAFlnk		E007;E022;E050;E057;E088
94	previously not reported	FGFR2	10:123348662:G:T	rs2912774	10	123348662	T	G	10:123351302:A:G	rs2860197	10	123351302	G	A	0.914464	E003,6_EnhG;E012,3_TxFlnk;E014,6_EnhG;E015,6_EnhG;E016,6_EnhG;E018,7_Enh;E019,6_EnhG;E020,6_EnhG;E024,6_EnhG;E027,7_Enh;E057,1_TssA;E058,2_TssAFlnk;E067,7_Enh;E068,7_Enh;E069,7_Enh;E070,7_Enh;E071,7_Enh;E072,7_Enh;E074,7_Enh;E076,7_Enh;E082,7_Enh;E086,7_Enh;E103,7_Enh;E111,7_Enh;E127,2_TssAFlnk		E088
94	previously not reported	FGFR2	10:123348662:G:T	rs2912774	10	123348662	T	G	10:123351324:C:T	rs2420946	10	123351324	T	C	0.897268	E003,6_EnhG;E012,3_TxFlnk;E014,6_EnhG;E015,6_EnhG;E016,6_EnhG;E018,7_Enh;E019,6_EnhG;E020,6_EnhG;E024,6_EnhG;E027,7_Enh;E057,1_TssA;E058,2_TssAFlnk;E067,7_Enh;E068,7_Enh;E069,7_Enh;E070,7_Enh;E071,7_Enh;E072,7_Enh;E074,7_Enh;E076,7_Enh;E082,7_Enh;E086,7_Enh;E103,7_Enh;E111,7_Enh;E127,2_TssAFlnk		E022;E057;E088;E127
94	previously not reported	FGFR2	10:123348662:G:T	rs2912774	10	123348662	T	G	10:123352136:C:T	rs2162540	10	123352136	C	T	0.875844	E001,6_EnhG;E002,7_Enh;E003,6_EnhG;E008,6_EnhG;E012,3_TxFlnk;E014,6_EnhG;E015,6_EnhG;E016,6_EnhG;E018,6_EnhG;E019,6_EnhG;E020,3_TxFlnk;E021,6_EnhG;E024,6_EnhG;E027,3_TxFlnk;E057,2_TssAFlnk;E058,3_TxFlnk;E067,7_Enh;E068,7_Enh;E069,2_TssAFlnk;E070,11_BivFlnk;E071,7_Enh;E072,7_Enh;E073,3_TxFlnk;E074,6_EnhG;E076,7_Enh;E080,6_EnhG;E081,7_Enh;E082,6_EnhG;E086,6_EnhG;E092,6_EnhG;E094,7_Enh;E098,6_EnhG;E…
94	previously not reported	FGFR2	10:123348662:G:T	rs2912774	10	123348662	T	G	10:123353869:C:T	rs3135718	10	123353869	C	T	0.912762	E001,7_Enh;E003,6_EnhG;E008,6_EnhG;E010,7_Enh;E011,2_TssAFlnk;E012,3_TxFlnk;E014,3_TxFlnk;E015,6_EnhG;E016,3_TxFlnk;E018,2_TssAFlnk;E019,3_TxFlnk;E020,3_TxFlnk;E021,6_EnhG;E022,7_Enh;E024,3_TxFlnk;E026,7_Enh;E027,3_TxFlnk;E054,12_EnhBiv;E057,2_TssAFlnk;E058,2_TssAFlnk;E067,2_TssAFlnk;E068,1_TssA;E069,2_TssAFlnk;E070,2_TssAFlnk;E071,2_TssAFlnk;E072,2_TssAFlnk;E073,7_Enh;E074,2_TssAFlnk;E076,1_TssA…	E083,7_Enh;E104,1_TssA	E057;E080;E083;E086;E088	E083
95	previously not reported	MPPED2	11:30432176:C:T	rs553951	11	30432176	T	C	11:30409044:A:G	rs654996	11	30409044	A	G	0.992974	E053,7_Enh;E089,7_Enh;E090,7_Enh;E108,7_Enh
95	previously not reported	MPPED2	11:30432176:C:T	rs553951	11	30432176	T	C	11:30411628:A:G	rs589725	11	30411628	A	G	0.992968	E061,7_Enh
95	previously not reported	MPPED2	11:30432176:C:T	rs553951	11	30432176	T	C	11:30411657:C:T	rs590045	11	30411657	C	T	0.995314	E061,7_Enh
95	previously not reported	MPPED2	11:30432176:C:T	rs553951	11	30432176	T	C	11:30426510:C:T	rs533407	11	30426510	C	T	0.965684	E036,7_Enh;E046,7_Enh;E051,7_Enh
95	previously not reported	MPPED2	11:30432176:C:T	rs553951	11	30432176	T	C	11:30429759:G:T	rs549469	11	30429759	T	G	0.997655	E007,7_Enh;E014,12_EnhBiv;E015,12_EnhBiv;E022,7_Enh;E024,7_Enh;E059,7_Enh;E061,7_Enh;E095,7_Enh	E095,7_Enh
95	previously not reported	MPPED2	11:30432176:C:T	rs553951	11	30432176	T	C	11:30432176:C:T		11	30432176	T	C	1			E080
97	previously not reported	PCNXL3	11:65391317:A:G	rs12801636	11	65391317	G	A	11:65384727:C:T	rs12790427	11	65384727	C	T	0.954357	E001,7_Enh;E005,3_TxFlnk;E006,6_EnhG;E008,6_EnhG;E009,3_TxFlnk;E010,3_TxFlnk;E012,7_Enh;E013,6_EnhG;E015,6_EnhG;E016,1_TssA;E017,3_TxFlnk;E019,6_EnhG;E022,6_EnhG;E023,2_TssAFlnk;E024,6_EnhG;E025,3_TxFlnk;E026,2_TssAFlnk;E027,3_TxFlnk;E028,7_Enh;E029,6_EnhG;E030,6_EnhG;E031,6_EnhG;E032,7_Enh;E033,3_TxFlnk;E034,6_EnhG;E035,2_TssAFlnk;E036,2_TssAFlnk;E037,3_TxFlnk;E038,6_EnhG;E039,6_EnhG;E040,7_Enh;…	E083,7_Enh;E104,7_Enh;E105,6_EnhG	E021;E032;E051;E097
97	previously not reported	PCNXL3	11:65391317:A:G	rs12801636	11	65391317	G	A	11:65391317:A:G	rs12801636	11	65391317	G	A	1	E056,3_TxFlnk;E059,6_EnhG		E097
98	previously not reported	CRYAB	11:111776066:A:G	rs12808601	11	111776066	G	A	11:111776066:A:G	rs12808601	11	111776066	G	A	1	E026,7_Enh
98	previously not reported	CRYAB	11:111776066:A:G	rs12808601	11	111776066	G	A	11:111776891:A:G	rs1940391	11	111776891	G	A	1	E025,7_Enh
99	previously not reported	USP28	11:113666335:A:G	rs144789148	11	113666335	A	G	11:113696596:D:I	rs141144601	11	113696596	I	C	0.802011	E083,6_EnhG	E083,6_EnhG
101	previously not reported	SSPN	12:26306484:C:T	rs78518764	12	26306484	T	C	12:26306484:C:T	rs78518764	12	26306484	T	C	1	E010,7_Enh;E013,7_Enh;E017,7_Enh;E023,7_Enh;E025,7_Enh;E026,7_Enh;E027,7_Enh;E028,7_Enh;E031,7_Enh;E032,7_Enh;E049,7_Enh;E052,7_Enh;E055,7_Enh;E056,7_Enh;E057,7_Enh;E058,7_Enh;E059,7_Enh;E061,7_Enh;E068,7_Enh;E071,7_Enh;E076,7_Enh;E077,7_Enh;E080,7_Enh;E083,7_Enh;E085,7_Enh;E097,7_Enh;E098,7_Enh;E099,7_Enh;E101,7_Enh;E102,7_Enh;E103,7_Enh;E104,7_Enh;E107,7_Enh;E108,7_Enh;E114,7_Enh;E116,7_Enh;E11…	E083,7_Enh;E104,7_Enh	E005;E006;E017;E028;E055;E056;E057;E059;E080;E083;E086;E094;E097;E098;E100;E109;E114;E117;E118;E119;E120;E121;E122;E125;E126;E127;E128	E083
102	previously not reported	ARID2	12:46209520:C:T	rs76611452	12	46209520	C	T	12:46199798:C:T	rs78341918	12	46199798	T	C	1	E037,7_Enh;E107,7_Enh;E118,7_Enh
102	previously not reported	ARID2	12:46209520:C:T	rs76611452	12	46209520	C	T	12:46209520:C:T	rs76611452	12	46209520	C	T	1	E016,6_EnhG;E061,6_EnhG		E003;E004;E021
102	previously not reported	ARID2	12:46209520:C:T	rs76611452	12	46209520	C	T	12:46300100:C:T	rs75704921	12	46300100	C	T	0.962564	E122,7_Enh		E122
103	previously not reported	SRGAP1	12:64283014:A:G	rs17099893	12	64283014	G	A	12:64274616:G:T	rs75986290	12	64274616	T	G	0.968127	E083,7_Enh;E095,7_Enh;E104,7_Enh;E105,7_Enh	E083,7_Enh;E095,7_Enh;E104,7_Enh;E105,7_Enh	E083	E083
103	previously not reported	SRGAP1	12:64283014:A:G	rs17099893	12	64283014	G	A	12:64280324:A:G	rs75016538	12	64280324	A	G	0.922127	E006,7_Enh
103	previously not reported	SRGAP1	12:64283014:A:G	rs17099893	12	64283014	G	A	12:64281052:C:T	rs17099886	12	64281052	T	C	0.82092	E017,6_EnhG;E055,7_Enh;E095,7_Enh;E098,7_Enh;E114,6_EnhG	E095,7_Enh
103	previously not reported	SRGAP1	12:64283014:A:G	rs17099893	12	64283014	G	A	12:64283014:A:G	rs17099893	12	64283014	G	A	1	E005,7_Enh;E006,6_EnhG;E010,7_Enh;E017,6_EnhG;E023,7_Enh;E025,2_TssAFlnk;E026,7_Enh;E028,7_Enh;E052,7_Enh;E053,7_Enh;E055,3_TxFlnk;E056,2_TssAFlnk;E058,7_Enh;E063,7_Enh;E066,7_Enh;E067,7_Enh;E068,7_Enh;E071,7_Enh;E072,7_Enh;E074,7_Enh;E084,7_Enh;E091,7_Enh;E094,7_Enh;E095,7_Enh;E098,7_Enh;E106,7_Enh;E110,7_Enh;E114,2_TssAFlnk;E118,7_Enh;E119,7_Enh;E120,7_Enh;E121,7_Enh;E125,7_Enh;E126,7_Enh;E127,…	E095,7_Enh	E006;E017;E055;E088;E120;E121;E128
103	previously not reported	SRGAP1	12:64283014:A:G	rs17099893	12	64283014	G	A	12:64284283:A:G	rs4346062	12	64284283	A	G	0.911566	E002,7_Enh;E006,6_EnhG;E016,7_Enh;E017,6_EnhG;E020,7_Enh;E025,6_EnhG;E055,6_EnhG;E066,7_Enh;E084,7_Enh;E098,7_Enh;E114,2_TssAFlnk;E118,2_TssAFlnk		E086;E114;E128
103	previously not reported	SRGAP1	12:64283014:A:G	rs17099893	12	64283014	G	A	12:64287950:C:T	rs78010625	12	64287950	T	C	0.951364	E010,7_Enh;E018,7_Enh;E023,7_Enh;E029,7_Enh;E030,7_Enh;E066,7_Enh;E118,7_Enh;E124,7_Enh		E120
103	previously not reported	SRGAP1	12:64283014:A:G	rs17099893	12	64283014	G	A	12:64291478:A:G	rs75180182	12	64291478	G	A	0.901213	E001,7_Enh;E009,7_Enh;E010,7_Enh;E011,2_TssAFlnk;E014,7_Enh;E015,7_Enh;E018,7_Enh;E025,7_Enh;E066,7_Enh;E077,7_Enh;E078,7_Enh;E080,7_Enh;E088,7_Enh;E114,7_Enh;E122,7_Enh		E122
103	previously not reported	SRGAP1	12:64283014:A:G	rs17099893	12	64283014	G	A	12:64295914:C:G	rs76589239	12	64295914	G	C	0.978479	E025,7_Enh;E028,7_Enh;E066,7_Enh;E086,7_Enh;E114,7_Enh
103	previously not reported	SRGAP1	12:64283014:A:G	rs17099893	12	64283014	G	A	12:64306327:A:G	rs112054997	12	64306327	G	A	0.825332	E029,7_Enh;E055,7_Enh;E056,7_Enh;E083,7_Enh;E085,7_Enh;E097,7_Enh;E124,7_Enh	E083,7_Enh
103	previously not reported	SRGAP1	12:65042887:C:T	rs10784418	12	65042887	C	T	12:65012824:C:T	rs7968403	12	65012824	T	C	0.920363	E006,7_Enh;E014,7_Enh;E017,7_Enh;E023,2_TssAFlnk;E024,7_Enh;E025,2_TssAFlnk;E027,7_Enh;E028,7_Enh;E029,7_Enh;E030,2_TssAFlnk;E031,2_TssAFlnk;E032,7_Enh;E033,7_Enh;E034,7_Enh;E035,7_Enh;E036,2_TssAFlnk;E037,7_Enh;E038,7_Enh;E039,7_Enh;E040,7_Enh;E041,7_Enh;E042,7_Enh;E043,7_Enh;E044,6_EnhG;E045,7_Enh;E046,7_Enh;E047,7_Enh;E048,7_Enh;E049,7_Enh;E050,2_TssAFlnk;E051,2_TssAFlnk;E052,7_Enh;E056,7_Enh;…	E095,7_Enh;E104,7_Enh;E105,7_Enh	E032;E116;E122;E123;E124
103	previously not reported	SRGAP1	12:65042887:C:T	rs10784418	12	65042887	C	T	12:65017698:A:G	rs1245169	12	65017698	G	A	0.931986	E001,7_Enh;E002,7_Enh;E003,7_Enh;E006,7_Enh;E008,7_Enh;E014,7_Enh;E015,7_Enh;E016,7_Enh;E017,7_Enh;E018,7_Enh;E020,7_Enh;E021,7_Enh;E027,7_Enh;E028,7_Enh;E029,7_Enh;E030,7_Enh;E031,7_Enh;E032,7_Enh;E033,6_EnhG;E034,7_Enh;E035,7_Enh;E036,7_Enh;E037,7_Enh;E038,7_Enh;E039,7_Enh;E040,7_Enh;E041,7_Enh;E042,7_Enh;E043,7_Enh;E044,7_Enh;E045,7_Enh;E046,7_Enh;E047,7_Enh;E048,7_Enh;E050,7_Enh;E051,7_Enh;E0…	E083,7_Enh	E006;E116
103	previously not reported	SRGAP1	12:65042887:C:T	rs10784418	12	65042887	C	T	12:65017844:G:T	rs1245168	12	65017844	G	T	0.931986	E001,2_TssAFlnk;E002,7_Enh;E003,7_Enh;E006,7_Enh;E008,7_Enh;E014,7_Enh;E015,7_Enh;E016,7_Enh;E017,7_Enh;E018,7_Enh;E020,7_Enh;E021,7_Enh;E027,7_Enh;E028,7_Enh;E029,7_Enh;E030,7_Enh;E031,7_Enh;E032,7_Enh;E033,6_EnhG;E034,7_Enh;E035,7_Enh;E036,7_Enh;E037,7_Enh;E038,7_Enh;E039,2_TssAFlnk;E040,7_Enh;E041,7_Enh;E042,7_Enh;E043,7_Enh;E044,7_Enh;E045,7_Enh;E046,7_Enh;E047,7_Enh;E048,7_Enh;E050,7_Enh;E05…	E083,7_Enh	E008;E034;E046;E059;E097;E116;E122
103	previously not reported	SRGAP1	12:65042887:C:T	rs10784418	12	65042887	C	T	12:65018192:C:T	rs2682714	12	65018192	T	C	0.931986	E001,2_TssAFlnk;E006,7_Enh;E008,7_Enh;E014,7_Enh;E015,7_Enh;E016,7_Enh;E017,7_Enh;E018,7_Enh;E024,7_Enh;E027,7_Enh;E028,7_Enh;E029,7_Enh;E030,7_Enh;E031,7_Enh;E032,7_Enh;E033,7_Enh;E034,7_Enh;E035,7_Enh;E036,7_Enh;E037,7_Enh;E038,7_Enh;E039,7_Enh;E040,7_Enh;E041,7_Enh;E042,7_Enh;E043,7_Enh;E044,7_Enh;E045,7_Enh;E046,7_Enh;E047,7_Enh;E048,7_Enh;E050,7_Enh;E051,7_Enh;E059,7_Enh;E061,7_Enh;E076,7_En…	E083,7_Enh
103	previously not reported	SRGAP1	12:65042887:C:T	rs10784418	12	65042887	C	T	12:65018725:A:G	rs2701850	12	65018725	G	A	0.931986	E001,7_Enh;E005,7_Enh;E006,7_Enh;E012,7_Enh;E014,7_Enh;E015,7_Enh;E016,7_Enh;E017,7_Enh;E018,7_Enh;E024,7_Enh;E027,7_Enh;E028,7_Enh;E029,7_Enh;E030,2_TssAFlnk;E031,7_Enh;E032,7_Enh;E033,7_Enh;E034,7_Enh;E035,7_Enh;E036,7_Enh;E037,7_Enh;E038,7_Enh;E039,2_TssAFlnk;E040,7_Enh;E041,7_Enh;E042,7_Enh;E043,7_Enh;E044,7_Enh;E045,7_Enh;E046,7_Enh;E047,7_Enh;E048,7_Enh;E050,7_Enh;E051,7_Enh;E052,7_Enh;E061…	E083,7_Enh;E095,7_Enh	E006;E059
103	previously not reported	SRGAP1	12:65042887:C:T	rs10784418	12	65042887	C	T	12:65019723:G:T	rs2701849	12	65019723	G	T	0.931986	E001,7_Enh;E002,7_Enh;E003,7_Enh;E004,7_Enh;E005,7_Enh;E006,7_Enh;E009,2_TssAFlnk;E010,1_TssA;E011,7_Enh;E012,7_Enh;E013,7_Enh;E014,7_Enh;E015,7_Enh;E016,7_Enh;E017,1_TssA;E018,7_Enh;E020,7_Enh;E023,2_TssAFlnk;E024,7_Enh;E025,2_TssAFlnk;E026,2_TssAFlnk;E027,1_TssA;E028,1_TssA;E029,2_TssAFlnk;E030,2_TssAFlnk;E031,2_TssAFlnk;E032,2_TssAFlnk;E033,2_TssAFlnk;E034,2_TssAFlnk;E035,2_TssAFlnk;E036,2_Tss…	E095,2_TssAFlnk;E104,2_TssAFlnk	E005;E006;E017;E028;E029;E032;E033;E034;E046;E050;E051;E055;E056;E057;E059;E080;E082;E083;E084;E085;E086;E088;E089;E090;E091;E092;E093;E094;E097;E098;E100;E109;E114;E116;E117;E118;E119;E120;E121;E122;E123;E124;E125;E126;E127;E128	E083
103	previously not reported	SRGAP1	12:65042887:C:T	rs10784418	12	65042887	C	T	12:65026115:A:G	rs1147105	12	65026115	G	A	0.932265	E024,7_Enh;E027,6_EnhG;E029,6_EnhG;E030,7_Enh;E031,6_EnhG;E032,6_EnhG;E033,6_EnhG;E034,6_EnhG;E037,7_Enh;E038,6_EnhG;E039,6_EnhG;E040,7_Enh;E041,6_EnhG;E042,7_Enh;E043,6_EnhG;E044,6_EnhG;E045,7_Enh;E046,6_EnhG;E047,7_Enh;E048,7_Enh;E059,7_Enh;E061,6_EnhG;E065,6_EnhG;E076,7_Enh;E080,6_EnhG;E088,7_Enh;E094,7_Enh;E095,7_Enh;E096,7_Enh;E100,7_Enh;E104,7_Enh;E105,7_Enh;E106,6_EnhG;E111,7_Enh;E113,7_En…	E095,7_Enh;E104,7_Enh;E105,7_Enh
103	previously not reported	SRGAP1	12:65042887:C:T	rs10784418	12	65042887	C	T	12:65026342:A:G	rs1147107	12	65026342	A	G	0.922586	E005,6_EnhG;E017,6_EnhG;E024,7_Enh;E027,6_EnhG;E029,6_EnhG;E030,7_Enh;E031,6_EnhG;E032,6_EnhG;E033,6_EnhG;E034,6_EnhG;E037,7_Enh;E038,6_EnhG;E039,6_EnhG;E040,7_Enh;E041,6_EnhG;E042,7_Enh;E043,6_EnhG;E044,6_EnhG;E045,7_Enh;E046,6_EnhG;E047,7_Enh;E048,7_Enh;E059,7_Enh;E061,6_EnhG;E062,6_EnhG;E065,6_EnhG;E066,7_Enh;E074,7_Enh;E076,7_Enh;E078,7_Enh;E080,7_Enh;E081,1_TssA;E088,7_Enh;E094,6_EnhG;E095,7…	E095,7_Enh;E104,7_Enh;E105,7_Enh	E080
103	previously not reported	SRGAP1	12:65042887:C:T	rs10784418	12	65042887	C	T	12:65028887:C:T	rs2682719	12	65028887	C	T	0.977661	E013,7_Enh;E015,7_Enh;E020,7_Enh;E027,6_EnhG;E028,7_Enh;E032,7_Enh;E033,6_EnhG;E034,6_EnhG;E037,7_Enh;E038,6_EnhG;E039,6_EnhG;E040,7_Enh;E041,6_EnhG;E042,7_Enh;E043,6_EnhG;E044,6_EnhG;E045,7_Enh;E046,7_Enh;E047,7_Enh;E048,6_EnhG;E058,7_Enh;E065,7_Enh;E075,7_Enh;E078,7_Enh;E080,7_Enh;E083,7_Enh;E084,7_Enh;E095,7_Enh;E098,7_Enh;E101,7_Enh;E102,7_Enh;E105,7_Enh;E106,7_Enh;E110,7_Enh;E114,6_EnhG;E118…	E083,7_Enh;E095,7_Enh;E105,7_Enh
103	previously not reported	SRGAP1	12:65042887:C:T	rs10784418	12	65042887	C	T	12:65029900:D:I	rs111762481	12	65029900	I	G	0.915164	E031,6_EnhG;E032,7_Enh;E034,7_Enh;E037,7_Enh;E038,7_Enh;E039,7_Enh;E040,7_Enh;E041,7_Enh;E042,7_Enh;E043,7_Enh;E044,6_EnhG;E045,7_Enh;E046,6_EnhG;E047,7_Enh;E048,6_EnhG;E059,7_Enh;E061,7_Enh;E065,7_Enh;E075,7_Enh;E101,7_Enh;E102,7_Enh;E106,7_Enh;E114,7_Enh;E118,7_Enh		E021
103	previously not reported	SRGAP1	12:65042887:C:T	rs10784417	12	65042887	C	T	12:65031248:A:G		12	65031248	G	A	0.982092			E059
103	previously not reported	SRGAP1	12:65042887:C:T	rs10784418	12	65042887	C	T	12:65031846:A:G	rs11175483	12	65031846	G	A	0.982092	E029,7_Enh;E030,7_Enh;E031,7_Enh;E034,7_Enh;E039,7_Enh;E040,7_Enh;E043,7_Enh;E061,7_Enh;E083,7_Enh;E124,7_Enh	E083,7_Enh	E034
103	previously not reported	SRGAP1	12:65042887:C:T	rs10784418	12	65042887	C	T	12:65031906:A:G	rs11175484	12	65031906	G	A	0.982092	E029,7_Enh;E030,7_Enh;E031,7_Enh;E034,7_Enh;E039,7_Enh;E040,7_Enh;E043,7_Enh;E061,7_Enh;E083,7_Enh;E124,7_Enh	E083,7_Enh
103	previously not reported	SRGAP1	12:65042887:C:T	rs10784418	12	65042887	C	T	12:65034025:C:T	rs1383117	12	65034025	C	T	0.986545	E027,7_Enh;E029,6_EnhG;E030,7_Enh;E032,6_EnhG;E033,7_Enh;E034,7_Enh;E037,7_Enh;E039,7_Enh;E040,7_Enh;E041,7_Enh;E043,7_Enh;E044,7_Enh;E045,7_Enh;E047,7_Enh;E102,7_Enh;E106,7_Enh;E114,7_Enh		E033
103	previously not reported	SRGAP1	12:65042887:C:T	rs10784418	12	65042887	C	T	12:65034439:G:T	rs1716496	12	65034439	T	G	0.991045	E029,6_EnhG;E030,7_Enh;E033,7_Enh;E034,7_Enh;E037,7_Enh;E039,7_Enh;E040,7_Enh;E041,7_Enh;E042,7_Enh;E043,7_Enh;E044,7_Enh;E046,7_Enh;E047,7_Enh;E061,7_Enh
103	previously not reported	SRGAP1	12:65042887:C:T	rs10784418	12	65042887	C	T	12:65036318:C:T	rs7975455	12	65036318	C	T	0.991045	E034,7_Enh;E037,7_Enh;E038,7_Enh;E039,7_Enh;E041,7_Enh;E042,7_Enh;E043,7_Enh;E045,7_Enh;E047,7_Enh;E048,7_Enh
103	previously not reported	SRGAP1	12:65042887:C:T	rs10784418	12	65042887	C	T	12:65036731:C:T	rs1716490	12	65036731	C	T	0.991045	E032,7_Enh;E034,7_Enh;E037,7_Enh;E038,7_Enh;E039,7_Enh;E040,7_Enh;E041,7_Enh;E042,7_Enh;E043,7_Enh;E044,7_Enh;E045,7_Enh;E047,7_Enh;E048,7_Enh;E096,7_Enh;E098,7_Enh
103	previously not reported	SRGAP1	12:65042887:C:T	rs10784418	12	65042887	C	T	12:65038211:C:G	rs1716517	12	65038211	C	G	0.986545	E017,7_Enh;E027,7_Enh;E032,7_Enh;E033,6_EnhG;E034,7_Enh;E037,7_Enh;E038,7_Enh;E039,7_Enh;E040,7_Enh;E041,6_EnhG;E042,7_Enh;E043,7_Enh;E044,7_Enh;E045,7_Enh;E046,7_Enh;E047,7_Enh;E048,7_Enh;E061,6_EnhG;E063,7_Enh;E065,7_Enh;E091,7_Enh;E094,7_Enh;E098,7_Enh;E104,7_Enh;E110,7_Enh;E114,7_Enh	E104,7_Enh
103	previously not reported	SRGAP1	12:65042887:C:T	rs10784418	12	65042887	C	T	12:65042049:C:T	rs1797684	12	65042049	C	T	1	E027,6_EnhG;E028,7_Enh;E033,6_EnhG;E034,6_EnhG;E037,7_Enh;E038,7_Enh;E039,7_Enh;E040,7_Enh;E041,7_Enh;E042,7_Enh;E043,7_Enh;E044,7_Enh;E045,7_Enh;E046,6_EnhG;E047,7_Enh;E048,7_Enh;E059,7_Enh;E061,7_Enh;E062,6_EnhG;E065,7_Enh;E076,7_Enh;E091,7_Enh;E094,7_Enh;E095,7_Enh;E096,7_Enh;E098,7_Enh;E104,7_Enh;E105,7_Enh;E111,7_Enh;E113,7_Enh;E116,7_Enh	E095,7_Enh;E104,7_Enh;E105,7_Enh	E059;E124
103	previously not reported	SRGAP1	12:65042887:C:T	rs10784418	12	65042887	C	T	12:65042504:A:G	rs1795625	12	65042504	G	A	1	E033,6_EnhG;E034,6_EnhG;E037,7_Enh;E038,7_Enh;E039,7_Enh;E041,7_Enh;E043,7_Enh;E044,7_Enh;E046,6_EnhG;E059,7_Enh;E061,7_Enh;E083,7_Enh;E095,7_Enh;E098,7_Enh;E104,7_Enh;E105,7_Enh;E111,7_Enh;E113,7_Enh	E083,7_Enh;E095,7_Enh;E104,7_Enh;E105,7_Enh
103	previously not reported	SRGAP1	12:65042887:C:T	rs10784418	12	65042887	C	T	12:65042887:C:T		12	65042887	C	T	1			E034;E122
103	previously not reported	SRGAP1	12:65042887:C:T	rs10784418	12	65042887	C	T	12:65043065:C:T	rs2682716	12	65043065	C	T	1	E024,7_Enh;E033,6_EnhG;E034,6_EnhG;E037,7_Enh;E038,7_Enh;E039,7_Enh;E041,7_Enh;E043,6_EnhG;E046,6_EnhG;E059,7_Enh;E061,7_Enh;E065,7_Enh;E083,7_Enh;E090,6_EnhG;E095,7_Enh;E098,7_Enh;E104,7_Enh;E105,7_Enh;E111,7_Enh;E113,7_Enh	E083,7_Enh;E095,7_Enh;E104,7_Enh;E105,7_Enh
103	previously not reported	SRGAP1	12:65042887:C:T	rs10784418	12	65042887	C	T	12:65043403:A:G	rs1795624	12	65043403	G	A	1	E001,7_Enh;E003,7_Enh;E004,7_Enh;E008,7_Enh;E010,7_Enh;E014,7_Enh;E015,7_Enh;E016,7_Enh;E018,7_Enh;E021,7_Enh;E024,7_Enh;E027,6_EnhG;E032,6_EnhG;E033,6_EnhG;E034,6_EnhG;E037,7_Enh;E038,7_Enh;E039,7_Enh;E040,7_Enh;E041,6_EnhG;E043,6_EnhG;E044,6_EnhG;E046,6_EnhG;E047,7_Enh;E048,7_Enh;E059,7_Enh;E061,7_Enh;E063,7_Enh;E065,2_TssAFlnk;E080,7_Enh;E083,7_Enh;E090,6_EnhG;E091,7_Enh;E092,7_Enh;E095,7_Enh;…	E083,7_Enh;E095,7_Enh;E104,7_Enh;E105,7_Enh	E046;E083;E089;E090;E098	E083
103	previously not reported	SRGAP1	12:65042887:C:T	rs10784418	12	65042887	C	T	12:65044814:G:T	rs1797688	12	65044814	G	T	1	E001,7_Enh;E003,7_Enh;E014,7_Enh;E015,7_Enh;E017,7_Enh;E018,7_Enh;E019,7_Enh;E020,7_Enh;E021,7_Enh;E024,7_Enh;E025,7_Enh;E029,7_Enh;E031,6_EnhG;E032,6_EnhG;E033,6_EnhG;E034,7_Enh;E037,7_Enh;E038,7_Enh;E039,7_Enh;E040,7_Enh;E041,6_EnhG;E042,7_Enh;E043,7_Enh;E044,6_EnhG;E045,7_Enh;E046,7_Enh;E047,7_Enh;E048,7_Enh;E059,7_Enh;E061,7_Enh;E076,7_Enh;E077,7_Enh;E080,7_Enh;E083,7_Enh;E084,7_Enh;E085,7_En…	E083,7_Enh	E006;E017;E032;E055;E056;E059;E080;E081;E083;E084;E085;E088;E090;E092;E094;E098;E109;E114;E119;E121;E122;E125;E126;E128	E083
103	previously not reported	SRGAP1	12:65042887:C:T	rs10784418	12	65042887	C	T	12:65045034:G:T	rs1797689	12	65045034	T	G	1	E001,7_Enh;E014,7_Enh;E015,7_Enh;E017,7_Enh;E020,7_Enh;E025,7_Enh;E029,7_Enh;E031,6_EnhG;E032,6_EnhG;E033,6_EnhG;E034,7_Enh;E037,7_Enh;E038,7_Enh;E039,7_Enh;E040,7_Enh;E041,6_EnhG;E042,7_Enh;E043,7_Enh;E044,6_EnhG;E045,7_Enh;E046,7_Enh;E047,7_Enh;E048,7_Enh;E059,7_Enh;E061,7_Enh;E076,7_Enh;E077,7_Enh;E080,7_Enh;E083,2_TssAFlnk;E084,7_Enh;E085,7_Enh;E092,7_Enh;E095,7_Enh;E096,7_Enh;E101,7_Enh;E102…	E083,2_TssAFlnk;E095,7_Enh	E032;E083	E083
103	previously not reported	SRGAP1	12:65042887:C:T	rs10784418	12	65042887	C	T	12:65046691:A:C	rs1795622	12	65046691	C	A	0.973515	E008,7_Enh;E027,7_Enh;E029,7_Enh;E030,7_Enh;E032,7_Enh;E033,7_Enh;E034,7_Enh;E037,7_Enh;E038,7_Enh;E039,7_Enh;E040,7_Enh;E041,6_EnhG;E042,7_Enh;E043,7_Enh;E044,7_Enh;E046,7_Enh;E047,7_Enh;E048,7_Enh;E051,7_Enh;E059,7_Enh;E061,7_Enh;E076,7_Enh;E080,7_Enh;E082,7_Enh;E083,7_Enh;E092,6_EnhG;E095,7_Enh;E098,7_Enh;E101,7_Enh;E102,7_Enh;E103,7_Enh;E104,7_Enh;E106,7_Enh;E114,7_Enh;E122,7_Enh;E124,7_Enh	E083,7_Enh;E095,7_Enh;E104,7_Enh	E059;E083;E088;E114	E083
103	previously not reported	SRGAP1	12:65042887:C:T	rs10784418	12	65042887	C	T	12:65047179:A:T	rs2620730	12	65047179	T	A	0.973515	E027,7_Enh;E030,7_Enh;E032,7_Enh;E033,7_Enh;E034,7_Enh;E037,7_Enh;E038,7_Enh;E039,7_Enh;E040,7_Enh;E041,6_EnhG;E042,7_Enh;E043,7_Enh;E044,7_Enh;E045,7_Enh;E046,7_Enh;E047,7_Enh;E048,7_Enh;E059,7_Enh;E061,7_Enh;E065,7_Enh;E076,7_Enh;E080,7_Enh;E083,7_Enh;E091,7_Enh;E092,6_EnhG;E095,7_Enh;E105,7_Enh;E106,7_Enh;E113,7_Enh;E114,7_Enh	E083,7_Enh;E095,7_Enh;E105,7_Enh
103	previously not reported	SRGAP1	12:65042887:C:T	rs10784418	12	65042887	C	T	12:65049191:A:G	rs1797679	12	65049191	A	G	0.977987	E013,7_Enh;E030,7_Enh;E031,7_Enh;E033,7_Enh;E034,7_Enh;E037,7_Enh;E038,7_Enh;E039,7_Enh;E040,7_Enh;E041,7_Enh;E042,7_Enh;E043,7_Enh;E044,7_Enh;E045,7_Enh;E047,7_Enh;E048,7_Enh;E050,7_Enh;E051,7_Enh;E066,7_Enh;E083,7_Enh;E084,7_Enh;E085,7_Enh;E091,7_Enh;E102,7_Enh;E106,7_Enh;E109,7_Enh;E110,7_Enh;E114,7_Enh;E118,7_Enh;E120,7_Enh;E123,7_Enh;E125,7_Enh	E083,7_Enh	E057;E083;E091;E123	E083
103	previously not reported	SRGAP1	12:65042887:C:T	rs10784418	12	65042887	C	T	12:65050154:A:G	rs1797678	12	65050154	G	A	0.973515	E013,7_Enh;E032,6_EnhG;E033,7_Enh;E034,7_Enh;E037,7_Enh;E038,7_Enh;E039,7_Enh;E040,7_Enh;E041,7_Enh;E042,7_Enh;E043,7_Enh;E044,7_Enh;E045,7_Enh;E046,7_Enh;E047,7_Enh;E048,7_Enh;E061,7_Enh;E066,7_Enh;E080,7_Enh;E083,7_Enh;E085,7_Enh;E101,7_Enh;E102,7_Enh;E106,7_Enh;E109,7_Enh;E110,7_Enh;E114,7_Enh;E118,7_Enh;E122,7_Enh;E125,7_Enh	E083,7_Enh	E080
103	previously not reported	SRGAP1	12:65042887:C:T	rs10784418	12	65042887	C	T	12:65051920:C:T	rs1690259	12	65051920	C	T	0.969302	E027,7_Enh;E032,6_EnhG;E033,2_TssAFlnk;E034,7_Enh;E037,7_Enh;E038,6_EnhG;E039,6_EnhG;E040,7_Enh;E041,7_Enh;E042,7_Enh;E043,6_EnhG;E044,6_EnhG;E045,6_EnhG;E046,7_Enh;E047,7_Enh;E048,2_TssAFlnk;E059,7_Enh;E061,7_Enh;E065,7_Enh;E076,7_Enh;E080,7_Enh;E083,7_Enh;E094,7_Enh;E095,7_Enh;E096,7_Enh;E098,7_Enh;E102,7_Enh;E103,7_Enh;E104,7_Enh;E105,7_Enh;E110,7_Enh;E111,7_Enh;E113,7_Enh;E116,6_EnhG;E118,7_E…	E083,7_Enh;E095,7_Enh;E104,7_Enh;E105,7_Enh	E032;E033;E034;E046;E083	E083
103	previously not reported	SRGAP1	12:65042887:C:T	rs10784418	12	65042887	C	T	12:65052710:C:T	rs1272547	12	65052710	T	C	0.969302	E017,7_Enh;E026,7_Enh;E031,7_Enh;E032,6_EnhG;E033,7_Enh;E034,7_Enh;E036,7_Enh;E037,7_Enh;E038,7_Enh;E039,6_EnhG;E040,7_Enh;E041,7_Enh;E042,7_Enh;E043,6_EnhG;E044,6_EnhG;E045,7_Enh;E046,7_Enh;E047,7_Enh;E048,7_Enh;E051,7_Enh;E059,7_Enh;E061,7_Enh;E063,7_Enh;E065,7_Enh;E074,7_Enh;E076,7_Enh;E077,7_Enh;E078,7_Enh;E080,7_Enh;E083,7_Enh;E085,7_Enh;E088,7_Enh;E090,6_EnhG;E094,7_Enh;E095,7_Enh;E096,7_En…	E083,7_Enh;E095,7_Enh;E104,7_Enh
103	previously not reported	SRGAP1	12:65042887:C:T	rs10784418	12	65042887	C	T	12:65054758:A:C	rs1270837	12	65054758	A	C	0.964812	E003,7_Enh;E006,7_Enh;E032,6_EnhG;E033,7_Enh;E034,7_Enh;E037,2_TssAFlnk;E038,7_Enh;E039,7_Enh;E040,7_Enh;E041,7_Enh;E042,7_Enh;E043,7_Enh;E044,7_Enh;E045,7_Enh;E046,7_Enh;E047,7_Enh;E048,7_Enh;E059,7_Enh;E061,7_Enh;E062,6_EnhG;E065,7_Enh;E076,7_Enh;E083,7_Enh;E095,7_Enh;E098,7_Enh;E113,7_Enh;E114,7_Enh;E116,2_TssAFlnk	E083,7_Enh;E095,7_Enh	E034;E059;E083;E116	E083
103	previously not reported	SRGAP1	12:65042887:C:T	rs10784418	12	65042887	C	T	12:65055057:C:T	rs1270836	12	65055057	C	T	0.960493	E032,7_Enh;E034,7_Enh;E037,7_Enh;E038,7_Enh;E039,7_Enh;E040,7_Enh;E041,7_Enh;E042,7_Enh;E043,7_Enh;E044,7_Enh;E045,7_Enh;E046,7_Enh;E047,7_Enh;E048,7_Enh;E059,7_Enh;E061,7_Enh;E062,6_EnhG;E083,7_Enh;E095,7_Enh;E105,7_Enh;E113,7_Enh;E116,7_Enh	E083,7_Enh;E095,7_Enh;E105,7_Enh	E059
103	previously not reported	SRGAP1	12:65042887:C:T	rs10784418	12	65042887	C	T	12:65055315:C:T	rs1244878	12	65055315	C	T	0.964812	E032,7_Enh;E034,7_Enh;E037,7_Enh;E038,7_Enh;E039,7_Enh;E040,7_Enh;E041,7_Enh;E042,7_Enh;E043,7_Enh;E044,7_Enh;E045,7_Enh;E046,7_Enh;E047,7_Enh;E048,7_Enh;E059,7_Enh;E061,7_Enh;E083,7_Enh;E105,7_Enh;E116,7_Enh	E083,7_Enh;E105,7_Enh	E083	E083
103	previously not reported	SRGAP1	12:65042887:C:T	rs10784418	12	65042887	C	T	12:65055909:A:C	rs1690273	12	65055909	A	C	0.964812	E030,7_Enh;E032,7_Enh;E034,7_Enh;E037,7_Enh;E038,7_Enh;E039,7_Enh;E040,7_Enh;E041,7_Enh;E042,7_Enh;E043,7_Enh;E044,7_Enh;E046,7_Enh;E047,7_Enh;E048,7_Enh;E059,7_Enh;E061,7_Enh;E083,7_Enh;E102,7_Enh;E111,7_Enh;E116,7_Enh	E083,7_Enh	E059
103	previously not reported	SRGAP1	12:65042887:C:T	rs10784418	12	65042887	C	T	12:65056231:A:T	rs1690272	12	65056231	T	A	0.969302	E027,7_Enh;E028,7_Enh;E032,7_Enh;E034,7_Enh;E037,7_Enh;E038,7_Enh;E039,7_Enh;E040,7_Enh;E041,7_Enh;E042,7_Enh;E043,7_Enh;E044,7_Enh;E046,7_Enh;E047,7_Enh;E048,7_Enh;E059,7_Enh;E061,7_Enh;E083,7_Enh;E114,7_Enh;E116,7_Enh;E118,7_Enh	E083,7_Enh	E004;E059
103	previously not reported	SRGAP1	12:65042887:C:T	rs10784418	12	65042887	C	T	12:65057306:D:I	rs112394432	12	65057306	I	A	0.947957	E023,7_Enh;E027,7_Enh;E028,7_Enh;E029,7_Enh;E030,7_Enh;E033,7_Enh;E034,7_Enh;E037,7_Enh;E039,7_Enh;E040,7_Enh;E041,7_Enh;E042,7_Enh;E043,7_Enh;E044,7_Enh;E047,7_Enh;E061,7_Enh;E116,7_Enh;E117,7_Enh;E118,7_Enh;E124,7_Enh
103	previously not reported	SRGAP1	12:65042887:C:T	rs10784418	12	65042887	C	T	12:65057332:C:T	rs1795618	12	65057332	T	C	0.969302	E023,7_Enh;E027,7_Enh;E028,7_Enh;E029,7_Enh;E030,7_Enh;E033,7_Enh;E034,7_Enh;E037,7_Enh;E039,7_Enh;E040,7_Enh;E041,7_Enh;E042,7_Enh;E043,7_Enh;E044,7_Enh;E047,7_Enh;E061,7_Enh;E116,7_Enh;E117,7_Enh;E118,7_Enh;E124,7_Enh
103	previously not reported	SRGAP1	12:65042887:C:T	rs10784418	12	65042887	C	T	12:65058541:A:G	rs1245179	12	65058541	A	G	0.964812	E023,7_Enh;E027,7_Enh;E029,7_Enh;E030,2_TssAFlnk;E031,7_Enh;E032,7_Enh;E033,7_Enh;E034,7_Enh;E037,7_Enh;E038,7_Enh;E039,7_Enh;E040,7_Enh;E041,7_Enh;E042,7_Enh;E043,7_Enh;E044,7_Enh;E046,7_Enh;E047,7_Enh;E048,7_Enh;E051,7_Enh;E061,7_Enh;E062,7_Enh;E077,7_Enh;E100,7_Enh;E109,7_Enh;E114,7_Enh;E116,7_Enh;E117,7_Enh;E124,7_Enh
103	previously not reported	SRGAP1	12:65042887:C:T	rs10784418	12	65042887	C	T	12:65058612:A:G	rs1245180	12	65058612	A	G	0.964812	E023,7_Enh;E027,7_Enh;E029,7_Enh;E030,7_Enh;E031,7_Enh;E032,7_Enh;E033,7_Enh;E034,7_Enh;E037,7_Enh;E038,7_Enh;E039,7_Enh;E040,7_Enh;E041,7_Enh;E042,7_Enh;E043,7_Enh;E044,7_Enh;E046,7_Enh;E047,7_Enh;E048,7_Enh;E051,7_Enh;E061,7_Enh;E062,7_Enh;E076,7_Enh;E077,7_Enh;E097,7_Enh;E100,7_Enh;E109,7_Enh;E114,7_Enh;E116,7_Enh;E117,7_Enh;E122,7_Enh;E124,7_Enh
103	previously not reported	SRGAP1	12:65042887:C:T	rs10784418	12	65042887	C	T	12:65058626:C:G	rs1245181	12	65058626	G	C	0.964812	E023,7_Enh;E027,7_Enh;E029,7_Enh;E030,7_Enh;E031,7_Enh;E032,7_Enh;E033,7_Enh;E034,7_Enh;E037,7_Enh;E038,7_Enh;E039,7_Enh;E040,7_Enh;E041,7_Enh;E042,7_Enh;E043,7_Enh;E044,7_Enh;E046,7_Enh;E047,7_Enh;E048,7_Enh;E051,7_Enh;E061,7_Enh;E062,7_Enh;E076,7_Enh;E077,7_Enh;E097,7_Enh;E100,7_Enh;E109,7_Enh;E114,7_Enh;E116,7_Enh;E117,7_Enh;E122,7_Enh;E124,7_Enh
103	previously not reported	SRGAP1	12:65042887:C:T	rs10784418	12	65042887	C	T	12:65059192:A:G	rs1245183	12	65059192	A	G	0.969302	E016,7_Enh;E018,7_Enh;E020,7_Enh;E023,7_Enh;E027,7_Enh;E029,7_Enh;E030,7_Enh;E031,7_Enh;E032,7_Enh;E033,7_Enh;E034,7_Enh;E037,7_Enh;E038,7_Enh;E039,7_Enh;E040,7_Enh;E041,7_Enh;E042,7_Enh;E043,7_Enh;E044,7_Enh;E045,7_Enh;E046,7_Enh;E047,7_Enh;E048,7_Enh;E050,7_Enh;E051,7_Enh;E061,7_Enh;E062,7_Enh;E066,7_Enh;E077,7_Enh;E083,7_Enh;E086,7_Enh;E097,7_Enh;E100,7_Enh;E101,7_Enh;E102,7_Enh;E103,7_Enh;E10…	E083,7_Enh;E104,7_Enh	E008;E034;E117;E122
103	previously not reported	SRGAP1	12:65042887:C:T	rs10784418	12	65042887	C	T	12:65060288:C:G	rs1261880	12	65060288	G	C	0.969302	E001,7_Enh;E003,7_Enh;E011,7_Enh;E013,7_Enh;E015,7_Enh;E016,7_Enh;E017,7_Enh;E018,7_Enh;E020,7_Enh;E021,7_Enh;E026,7_Enh;E027,7_Enh;E029,7_Enh;E030,7_Enh;E031,7_Enh;E032,7_Enh;E033,2_TssAFlnk;E034,7_Enh;E035,7_Enh;E036,7_Enh;E037,7_Enh;E038,2_TssAFlnk;E039,2_TssAFlnk;E040,7_Enh;E041,2_TssAFlnk;E042,7_Enh;E043,7_Enh;E044,2_TssAFlnk;E045,2_TssAFlnk;E046,7_Enh;E047,2_TssAFlnk;E048,2_TssAFlnk;E049,7_…	E083,2_TssAFlnk;E095,7_Enh;E104,7_Enh	E006;E021;E032;E033;E034;E046;E083;E084;E088;E092;E094;E097;E116;E120;E121;E123;E128	E083
103	previously not reported	SRGAP1	12:65042887:C:T	rs10784418	12	65042887	C	T	12:65060364:A:G	rs1795621	12	65060364	G	A	0.969302	E001,7_Enh;E003,7_Enh;E011,7_Enh;E013,7_Enh;E015,7_Enh;E016,7_Enh;E017,7_Enh;E018,7_Enh;E020,7_Enh;E021,7_Enh;E026,7_Enh;E027,7_Enh;E029,7_Enh;E030,7_Enh;E031,7_Enh;E032,7_Enh;E033,2_TssAFlnk;E034,7_Enh;E035,7_Enh;E036,7_Enh;E037,7_Enh;E038,2_TssAFlnk;E039,2_TssAFlnk;E040,7_Enh;E041,2_TssAFlnk;E042,7_Enh;E043,7_Enh;E044,2_TssAFlnk;E045,2_TssAFlnk;E046,7_Enh;E047,2_TssAFlnk;E048,2_TssAFlnk;E049,7_…	E083,2_TssAFlnk;E095,7_Enh;E104,7_Enh	E004;E006;E032;E034;E046;E083;E092;E094;E098;E109;E123	E083
103	previously not reported	SRGAP1	12:65042887:C:T	rs10784418	12	65042887	C	T	12:65060976:G:T	rs1270437	12	65060976	T	G	0.964812	E001,7_Enh;E003,7_Enh;E006,7_Enh;E011,7_Enh;E014,7_Enh;E015,7_Enh;E016,7_Enh;E017,7_Enh;E018,7_Enh;E020,7_Enh;E024,7_Enh;E027,7_Enh;E030,7_Enh;E031,7_Enh;E032,7_Enh;E033,2_TssAFlnk;E034,7_Enh;E036,7_Enh;E037,7_Enh;E038,7_Enh;E039,7_Enh;E040,7_Enh;E041,7_Enh;E042,2_TssAFlnk;E043,7_Enh;E044,7_Enh;E045,7_Enh;E046,7_Enh;E047,7_Enh;E048,2_TssAFlnk;E050,7_Enh;E051,7_Enh;E059,7_Enh;E061,7_Enh;E062,7_Enh…	E083,7_Enh;E095,7_Enh;E104,7_Enh;E105,7_Enh	E123
103	previously not reported	SRGAP1	12:65042887:C:T	rs10784418	12	65042887	C	T	12:65061137:C:T	rs1245184	12	65061137	C	T	0.964812	E001,7_Enh;E003,7_Enh;E006,7_Enh;E011,7_Enh;E014,7_Enh;E015,7_Enh;E016,7_Enh;E018,7_Enh;E020,7_Enh;E024,7_Enh;E027,7_Enh;E030,7_Enh;E031,7_Enh;E032,7_Enh;E033,2_TssAFlnk;E034,7_Enh;E036,7_Enh;E037,7_Enh;E038,7_Enh;E039,7_Enh;E040,7_Enh;E041,7_Enh;E042,7_Enh;E043,7_Enh;E044,7_Enh;E045,7_Enh;E046,7_Enh;E047,7_Enh;E048,7_Enh;E050,7_Enh;E051,7_Enh;E059,7_Enh;E061,7_Enh;E062,7_Enh;E065,7_Enh;E075,7_En…	E083,7_Enh;E095,7_Enh;E104,7_Enh;E105,7_Enh
103	previously not reported	SRGAP1	12:65042887:C:T	rs10784418	12	65042887	C	T	12:65061265:C:T	rs1245185	12	65061265	C	T	0.964812	E001,7_Enh;E003,7_Enh;E011,7_Enh;E014,7_Enh;E015,7_Enh;E016,7_Enh;E018,7_Enh;E020,7_Enh;E024,7_Enh;E027,7_Enh;E030,7_Enh;E031,7_Enh;E032,7_Enh;E033,2_TssAFlnk;E034,7_Enh;E035,7_Enh;E036,7_Enh;E037,7_Enh;E038,7_Enh;E039,7_Enh;E040,7_Enh;E041,7_Enh;E042,7_Enh;E043,7_Enh;E044,7_Enh;E045,7_Enh;E046,7_Enh;E047,7_Enh;E048,7_Enh;E050,7_Enh;E051,7_Enh;E059,7_Enh;E061,7_Enh;E062,7_Enh;E065,7_Enh;E075,7_En…	E083,7_Enh;E095,7_Enh;E104,7_Enh;E105,7_Enh	E086
103	previously not reported	SRGAP1	12:65042887:C:T	rs10784418	12	65042887	C	T	12:65065169:C:T	rs1716506	12	65065169	C	T	0.964812	E001,7_Enh;E002,7_Enh;E003,7_Enh;E004,7_Enh;E005,7_Enh;E006,7_Enh;E008,7_Enh;E011,7_Enh;E013,7_Enh;E014,7_Enh;E015,7_Enh;E016,7_Enh;E017,7_Enh;E018,7_Enh;E019,7_Enh;E020,7_Enh;E023,7_Enh;E024,7_Enh;E025,7_Enh;E026,7_Enh;E027,7_Enh;E028,7_Enh;E029,7_Enh;E030,2_TssAFlnk;E031,7_Enh;E032,7_Enh;E033,2_TssAFlnk;E034,7_Enh;E035,7_Enh;E036,7_Enh;E037,2_TssAFlnk;E038,2_TssAFlnk;E039,2_TssAFlnk;E040,7_Enh;…	E083,7_Enh;E095,7_Enh;E104,7_Enh;E105,7_Enh	E004;E005;E006;E008;E028;E046;E055;E057;E059;E080;E083;E084;E085;E088;E091;E109;E114;E117;E119;E121;E122;E123;E124;E127;E128	E083
103	previously not reported	SRGAP1	12:65042887:C:T	rs10784418	12	65042887	C	T	12:65065191:C:T	rs1268914	12	65065191	T	C	0.969302	E001,7_Enh;E002,7_Enh;E003,7_Enh;E004,7_Enh;E005,7_Enh;E006,7_Enh;E008,7_Enh;E011,7_Enh;E013,7_Enh;E014,7_Enh;E015,7_Enh;E016,7_Enh;E017,7_Enh;E018,7_Enh;E019,7_Enh;E020,7_Enh;E023,7_Enh;E024,7_Enh;E025,7_Enh;E026,7_Enh;E027,7_Enh;E028,7_Enh;E029,7_Enh;E030,2_TssAFlnk;E031,7_Enh;E032,7_Enh;E033,2_TssAFlnk;E034,7_Enh;E035,7_Enh;E036,7_Enh;E037,2_TssAFlnk;E038,2_TssAFlnk;E039,2_TssAFlnk;E040,7_Enh;…	E083,7_Enh;E095,7_Enh;E104,7_Enh;E105,7_Enh	E004;E005;E006;E008;E017;E022;E028;E029;E034;E046;E055;E056;E057;E059;E080;E083;E084;E085;E088;E091;E092;E094;E097;E098;E109;E114;E117;E119;E120;E121;E122;E123;E124;E125;E126;E127;E128	E083
103	previously not reported	SRGAP1	12:65042887:C:T	rs10784418	12	65042887	C	T	12:65066245:A:T	rs1245186	12	65066245	T	A	0.964812	E005,7_Enh;E006,7_Enh;E011,7_Enh;E013,7_Enh;E015,7_Enh;E016,7_Enh;E021,7_Enh;E027,7_Enh;E028,7_Enh;E029,7_Enh;E030,7_Enh;E031,7_Enh;E032,7_Enh;E033,7_Enh;E034,7_Enh;E035,7_Enh;E036,7_Enh;E037,7_Enh;E038,2_TssAFlnk;E039,2_TssAFlnk;E040,7_Enh;E041,2_TssAFlnk;E042,2_TssAFlnk;E043,7_Enh;E044,7_Enh;E045,7_Enh;E046,7_Enh;E047,7_Enh;E048,7_Enh;E050,7_Enh;E051,7_Enh;E053,7_Enh;E057,7_Enh;E058,7_Enh;E059,…	E083,7_Enh;E095,7_Enh;E105,7_Enh	E117;E123
103	previously not reported	SRGAP1	12:65042887:C:T	rs10784418	12	65042887	C	T	12:65068811:A:G	rs1264485	12	65068811	A	G	0.951986	E002,7_Enh;E013,7_Enh;E015,7_Enh;E027,7_Enh;E029,7_Enh;E030,7_Enh;E031,7_Enh;E032,7_Enh;E033,7_Enh;E034,7_Enh;E035,7_Enh;E036,7_Enh;E037,7_Enh;E038,7_Enh;E039,7_Enh;E040,7_Enh;E041,7_Enh;E042,7_Enh;E043,7_Enh;E044,7_Enh;E045,7_Enh;E046,7_Enh;E047,7_Enh;E048,7_Enh;E051,7_Enh;E053,7_Enh;E054,7_Enh;E055,7_Enh;E059,7_Enh;E061,7_Enh;E062,7_Enh;E075,7_Enh;E077,7_Enh;E080,7_Enh;E083,7_Enh;E085,7_Enh;E09…	E083,7_Enh;E095,7_Enh;E104,7_Enh;E105,7_Enh	E100;E118
103	previously not reported	SRGAP1	12:65042887:C:T	rs10784418	12	65042887	C	T	12:65068834:C:G	rs1245187	12	65068834	C	G	0.947289	E002,7_Enh;E013,7_Enh;E015,7_Enh;E027,7_Enh;E029,7_Enh;E030,7_Enh;E031,7_Enh;E032,7_Enh;E033,7_Enh;E034,7_Enh;E035,7_Enh;E036,7_Enh;E037,7_Enh;E038,7_Enh;E039,7_Enh;E040,7_Enh;E041,7_Enh;E042,7_Enh;E043,7_Enh;E044,7_Enh;E045,7_Enh;E046,7_Enh;E047,7_Enh;E048,7_Enh;E051,7_Enh;E053,7_Enh;E054,7_Enh;E055,7_Enh;E059,7_Enh;E061,7_Enh;E062,7_Enh;E075,7_Enh;E077,7_Enh;E080,7_Enh;E083,7_Enh;E085,7_Enh;E09…	E083,7_Enh;E095,7_Enh;E104,7_Enh;E105,7_Enh	E100;E118
103	previously not reported	SRGAP1	12:65042887:C:T	rs10784418	12	65042887	C	T	12:65072628:A:G	rs1244873	12	65072628	A	G	0.951364	E006,7_Enh;E018,7_Enh;E027,7_Enh;E028,7_Enh;E029,7_Enh;E030,7_Enh;E031,7_Enh;E032,7_Enh;E033,7_Enh;E034,7_Enh;E035,7_Enh;E037,2_TssAFlnk;E038,2_TssAFlnk;E039,7_Enh;E040,7_Enh;E041,7_Enh;E042,7_Enh;E043,7_Enh;E044,7_Enh;E045,7_Enh;E046,7_Enh;E047,7_Enh;E048,7_Enh;E050,7_Enh;E051,7_Enh;E057,7_Enh;E058,7_Enh;E061,7_Enh;E062,7_Enh;E076,7_Enh;E077,7_Enh;E078,7_Enh;E083,7_Enh;E090,7_Enh;E093,7_Enh;E095…	E083,7_Enh;E095,7_Enh	E123
103	previously not reported	SRGAP1	12:65042887:C:T	rs10784418	12	65042887	C	T	12:65075332:G:T	rs1244869	12	65075332	T	G	0.917041	E001,7_Enh;E004,7_Enh;E005,7_Enh;E011,7_Enh;E013,7_Enh;E015,7_Enh;E016,7_Enh;E017,7_Enh;E024,7_Enh;E027,7_Enh;E029,7_Enh;E030,7_Enh;E031,7_Enh;E032,7_Enh;E033,2_TssAFlnk;E034,7_Enh;E036,7_Enh;E037,7_Enh;E038,2_TssAFlnk;E039,2_TssAFlnk;E040,7_Enh;E041,2_TssAFlnk;E042,2_TssAFlnk;E043,7_Enh;E044,7_Enh;E045,7_Enh;E046,7_Enh;E047,7_Enh;E048,2_TssAFlnk;E050,7_Enh;E051,7_Enh;E059,7_Enh;E061,7_Enh;E062,7…	E083,7_Enh;E095,7_Enh;E104,7_Enh;E105,7_Enh	E004;E006;E033;E034;E116
103	previously not reported	SRGAP1	12:65042887:C:T	rs10784418	12	65042887	C	T	12:65076498:G:T	rs2682728	12	65076498	G	T	0.917041	E001,7_Enh;E004,7_Enh;E011,7_Enh;E013,7_Enh;E014,7_Enh;E015,7_Enh;E016,2_TssAFlnk;E017,7_Enh;E018,7_Enh;E019,7_Enh;E020,7_Enh;E024,7_Enh;E026,7_Enh;E027,7_Enh;E029,7_Enh;E030,7_Enh;E032,7_Enh;E033,7_Enh;E034,7_Enh;E037,7_Enh;E038,7_Enh;E039,7_Enh;E040,7_Enh;E041,7_Enh;E042,7_Enh;E043,7_Enh;E044,7_Enh;E045,7_Enh;E046,7_Enh;E047,7_Enh;E048,7_Enh;E053,7_Enh;E055,7_Enh;E059,7_Enh;E061,7_Enh;E062,7_En…	E083,7_Enh;E095,7_Enh	E003;E004;E005;E006;E008;E017;E021;E022;E034;E055;E056;E059;E080;E082;E083;E084;E085;E086;E088;E089;E090;E091;E092;E094;E097;E098;E100;E109;E114;E120;E121;E122;E123;E124;E125;E126;E128	E083
103	previously not reported	SRGAP1	12:65042887:C:T	rs10784418	12	65042887	C	T	12:65081229:G:T	rs1797677	12	65081229	T	G	0.938298	E011,7_Enh;E025,7_Enh;E030,6_EnhG;E031,6_EnhG;E033,6_EnhG;E034,6_EnhG;E037,7_Enh;E038,6_EnhG;E039,7_Enh;E040,7_Enh;E041,6_EnhG;E042,7_Enh;E043,6_EnhG;E044,6_EnhG;E046,6_EnhG;E047,7_Enh;E048,6_EnhG;E055,7_Enh;E056,7_Enh;E076,7_Enh;E080,6_EnhG;E090,6_EnhG;E093,7_Enh;E118,7_Enh;E120,7_Enh;E121,7_Enh;E126,7_Enh;E128,7_Enh
104	previously not reported	MIR6074	12:66394664:C:T	rs4026608	12	66394664	C	T	12:66394664:C:T	rs4026608	12	66394664	C	T	1	E005,7_Enh;E057,7_Enh;E119,7_Enh
104	previously not reported	MIR6074	12:66394664:C:T	rs4026608	12	66394664	C	T	12:66396656:D:I	rs34550199	12	66396656	D	I	0.955796	E052,2_TssAFlnk;E058,7_Enh;E127,7_Enh;E129,7_Enh
104	previously not reported	MIR6074	12:66394664:C:T	rs4026608	12	66394664	C	T	12:66398427:A:C	rs2086404	12	66398427	A	C	0.931446	E116,7_Enh
104	previously not reported	MIR6074	12:66394664:C:T	rs4026608	12	66394664	C	T	12:66398933:A:C	rs899844	12	66398933	A	C	0.955195	E005,7_Enh;E007,7_Enh;E058,7_Enh;E083,7_Enh;E116,7_Enh;E118,7_Enh	E083,7_Enh	E083	E083
104	previously not reported	MIR6074	12:66394664:C:T	rs10878359	12	66394664	C	T	12:66404624:C:T		12	66404624	T	C	0.969526			E127
104	previously not reported	MIR6074	12:66394664:C:T	rs4026608	12	66394664	C	T	12:66409705:C:G	rs7979129	12	66409705	C	G	0.909955	E013,7_Enh;E025,7_Enh;E055,7_Enh;E088,7_Enh;E126,7_Enh		E083	E083
104	previously not reported	MIR6074	12:66394664:C:T	rs4026608	12	66394664	C	T	12:66409715:A:C	rs7979034	12	66409715	A	C	0.916233	E013,7_Enh;E025,7_Enh;E055,7_Enh;E088,7_Enh;E126,7_Enh		E083	E083
104	previously not reported	MIR6074	12:66394664:C:T	rs4026608	12	66394664	C	T	12:66412130:A:G	rs1480470	12	66412130	A	G	0.839763	E025,7_Enh;E026,7_Enh;E055,7_Enh;E056,7_Enh;E118,7_Enh;E126,7_Enh
105	previously not reported	SLC6A15	12:84806298:A:G	rs10862858	12	84806298	A	G	12:84806298:A:G		12	84806298	A	G	1			E089;E090
106	previously not reported	HCFC2	12:104503806:A:G	rs2629745	12	104503806	A	G	12:104503806:A:G	rs2629745	12	104503806	A	G	1	E023,7_Enh;E066,7_Enh;E087,7_Enh;E107,7_Enh		E109
107	previously not reported	RIC8B	12:107166122:C:G	rs3759310	12	107166122	C	G	12:107065258:A:G	rs1922436	12	107065258	A	G	0.800566	E007,7_Enh;E010,6_EnhG;E012,7_Enh;E028,7_Enh;E053,7_Enh;E054,7_Enh;E093,7_Enh;E112,7_Enh;E116,7_Enh
107	previously not reported	RIC8B	12:107166122:C:G	rs3759310	12	107166122	C	G	12:107081599:A:C	rs4346064	12	107081599	C	A	0.916774	E084,7_Enh		E084;E085
107	previously not reported	RIC8B	12:107166122:C:G	rs10778503	12	107166122	C	G	12:107090616:C:T		12	107090616	C	T	0.800417			E082;E088
107	previously not reported	RIC8B	12:107166122:C:G	rs3759310	12	107166122	C	G	12:107117521:A:G	rs754184	12	107117521	A	G	0.828715	E001,7_Enh;E003,7_Enh;E004,7_Enh;E007,7_Enh;E012,7_Enh;E015,7_Enh;E016,7_Enh;E018,7_Enh;E019,7_Enh;E020,7_Enh;E024,7_Enh;E077,7_Enh;E083,7_Enh;E084,7_Enh;E085,7_Enh;E102,7_Enh	E083,7_Enh	E022;E084
107	previously not reported	RIC8B	12:107166122:C:G	rs3759310	12	107166122	C	G	12:107144328:A:G	rs12424114	12	107144328	A	G	0.930862	E037,7_Enh;E042,7_Enh;E074,1_TssA
107	previously not reported	RIC8B	12:107166122:C:G	rs10672489	12	107166122	C	G	12:107158887:D:I		12	107158887	D	I	0.870794			E088
107	previously not reported	RIC8B	12:107166122:C:G	rs10778508	12	107166122	C	G	12:107159405:C:T		12	107159405	C	T	0.944253			E007
107	previously not reported	RIC8B	12:107166122:C:G	rs3759310	12	107166122	C	G	12:107160169:A:G	rs7486905	12	107160169	G	A	0.872684	E001,7_Enh;E002,7_Enh;E003,7_Enh;E006,7_Enh;E007,7_Enh;E008,7_Enh;E009,7_Enh;E010,7_Enh;E012,7_Enh;E014,7_Enh;E015,7_Enh;E016,7_Enh;E018,7_Enh;E019,7_Enh;E020,7_Enh;E021,7_Enh;E022,7_Enh;E023,7_Enh;E024,7_Enh;E027,7_Enh;E033,7_Enh;E039,7_Enh;E047,7_Enh;E052,7_Enh;E053,7_Enh;E054,7_Enh;E063,7_Enh;E066,7_Enh;E067,7_Enh;E068,7_Enh;E071,7_Enh;E073,7_Enh;E080,7_Enh;E083,7_Enh;E086,7_Enh;E088,7_Enh;E09…	E083,7_Enh;E095,7_Enh;E104,7_Enh	E083;E086;E090;E117;E123;E124;E125;E128	E083
107	previously not reported	RIC8B	12:107166122:C:G	rs10778510	12	107166122	C	G	12:107162965:A:G		12	107162965	G	A	0.851288			E003;E004;E007;E008;E017;E021;E022;E055;E056;E057;E081;E088;E093;E098;E100;E114;E125;E126;E128
107	previously not reported	RIC8B	12:107166122:C:G	rs3759310	12	107166122	C	G	12:107165669:C:T	rs3910854	12	107165669	T	C	0.859681	E001,7_Enh;E009,7_Enh;E011,7_Enh;E014,7_Enh;E015,7_Enh;E016,7_Enh;E018,7_Enh;E019,7_Enh;E020,7_Enh;E049,7_Enh;E066,7_Enh;E077,7_Enh;E083,7_Enh;E102,7_Enh;E114,7_Enh;E118,7_Enh	E083,7_Enh
107	previously not reported	RIC8B	12:107166122:C:G	rs3759310	12	107166122	C	G	12:107166122:C:G	rs3759310	12	107166122	C	G	1	E011,7_Enh;E016,7_Enh;E019,7_Enh;E020,7_Enh;E049,7_Enh;E066,7_Enh;E083,7_Enh;E114,7_Enh;E118,7_Enh	E083,7_Enh	E032
107	previously not reported	RIC8B	12:107166122:C:G	rs3759310	12	107166122	C	G	12:107171808:A:G	rs4964489	12	107171808	A	G	0.866143	E018,7_Enh;E020,6_EnhG;E037,7_Enh;E044,6_EnhG;E054,6_EnhG;E066,7_Enh;E068,1_TssA;E080,7_Enh;E083,7_Enh;E085,7_Enh;E109,7_Enh;E110,7_Enh;E114,2_TssAFlnk;E116,1_TssA;E117,7_Enh;E118,7_Enh;E123,7_Enh	E083,7_Enh
107	previously not reported	RIC8B	12:107166122:C:G	rs3759310	12	107166122	C	G	12:107184363:G:T	rs2044304	12	107184363	T	G	0.845763	E049,7_Enh;E061,7_Enh;E110,7_Enh
107	previously not reported	RIC8B	12:107166122:C:G	rs10861665	12	107166122	C	G	12:107193836:C:T		12	107193836	T	C	0.846405			E083	E083
107	previously not reported	RIC8B	12:107166122:C:G	rs10507214	12	107166122	C	G	12:107194461:A:G		12	107194461	G	A	0.846405			E059
107	previously not reported	RIC8B	12:107166122:C:G	rs3759310	12	107166122	C	G	12:107195929:A:C	rs11113116	12	107195929	C	A	0.884457	E080,7_Enh;E083,1_TssA;E103,7_Enh;E107,7_Enh;E108,7_Enh	E083,1_TssA	E080;E083	E083
107	previously not reported	RIC8B	12:107166122:C:G	rs3759310	12	107166122	C	G	12:107196825:C:T	rs66716938	12	107196825	T	C	0.867952	E083,7_Enh;E095,7_Enh;E100,7_Enh;E105,7_Enh;E107,7_Enh;E108,7_Enh	E083,7_Enh;E095,7_Enh;E105,7_Enh	E083	E083
107	previously not reported	RIC8B	12:107166122:C:G	rs3759310	12	107166122	C	G	12:107198611:A:G	rs12369214	12	107198611	G	A	0.978131	E011,7_Enh;E014,6_EnhG;E080,7_Enh;E083,7_Enh;E102,7_Enh;E105,7_Enh;E107,7_Enh	E083,7_Enh;E105,7_Enh	E004;E021;E109
107	previously not reported	RIC8B	12:107166122:C:G	rs3759310	12	107166122	C	G	12:107239947:A:G	rs1579808	12	107239947	G	A	0.929325	E057,7_Enh;E058,7_Enh;E127,7_Enh		E005;E046;E123
108	previously not reported	UBE3B	12:109976893:G:T	rs2004359	12	109976893	G	T	12:109888158:D:I	rs3217162	12	109888158	I	G	0.82539	E046,6_EnhG;E075,7_Enh;E076,6_EnhG;E094,6_EnhG;E096,6_EnhG;E101,6_EnhG;E102,2_TssAFlnk;E103,7_Enh;E106,6_EnhG;E111,6_EnhG;E118,7_Enh		E003;E004;E007;E046;E050;E083;E086;E093;E114;E117;E118	E083
108	previously not reported	UBE3B	12:109976893:G:T	rs2004359	12	109976893	G	T	12:109895168:C:G	rs2338104	12	109895168	C	G	0.93156	E009,6_EnhG;E015,6_EnhG;E016,6_EnhG;E017,6_EnhG;E018,6_EnhG;E019,6_EnhG;E020,6_EnhG;E023,6_EnhG;E024,6_EnhG;E026,6_EnhG;E046,6_EnhG;E049,6_EnhG;E071,6_EnhG;E074,6_EnhG;E076,6_EnhG;E103,6_EnhG;E111,6_EnhG
108	previously not reported	UBE3B	12:109976893:G:T	rs2004359	12	109976893	G	T	12:109896165:C:T	rs7313797	12	109896165	T	C	0.850514	E001,7_Enh;E002,7_Enh;E003,7_Enh;E004,7_Enh;E005,6_EnhG;E006,6_EnhG;E007,7_Enh;E008,7_Enh;E009,6_EnhG;E010,6_EnhG;E011,6_EnhG;E012,7_Enh;E013,6_EnhG;E014,2_TssAFlnk;E015,2_TssAFlnk;E016,7_Enh;E017,6_EnhG;E018,2_TssAFlnk;E019,2_TssAFlnk;E020,3_TxFlnk;E021,7_Enh;E022,7_Enh;E023,6_EnhG;E024,7_Enh;E025,7_Enh;E026,6_EnhG;E027,6_EnhG;E046,6_EnhG;E049,2_TssAFlnk;E052,6_EnhG;E053,6_EnhG;E055,6_EnhG;E056,…	E095,6_EnhG;E105,6_EnhG	E003;E006;E017;E022;E055;E056;E080;E097;E098;E116;E121;E122;E125;E126;E128
108	previously not reported	UBE3B	12:109976893:G:T	rs2004359	12	109976893	G	T	12:109896988:D:I	rs34714183	12	109896988	D	I	0.947176	E001,7_Enh;E003,7_Enh;E004,7_Enh;E005,6_EnhG;E007,7_Enh;E008,7_Enh;E009,6_EnhG;E010,6_EnhG;E011,7_Enh;E012,7_Enh;E013,6_EnhG;E014,2_TssAFlnk;E015,2_TssAFlnk;E016,7_Enh;E017,3_TxFlnk;E018,7_Enh;E019,2_TssAFlnk;E020,2_TssAFlnk;E021,7_Enh;E023,6_EnhG;E024,7_Enh;E025,2_TssAFlnk;E026,3_TxFlnk;E027,6_EnhG;E046,6_EnhG;E049,2_TssAFlnk;E052,6_EnhG;E055,2_TssAFlnk;E056,7_Enh;E061,6_EnhG;E063,6_EnhG;E065,7_…	E083,7_Enh;E104,7_Enh	E003;E006;E008;E017;E055;E097
108	previously not reported	UBE3B	12:109976893:G:T	rs2004359	12	109976893	G	T	12:109898732:A:G	rs1558804	12	109898732	A	G	0.850514	E001,7_Enh;E002,7_Enh;E003,7_Enh;E005,6_EnhG;E006,6_EnhG;E008,6_EnhG;E009,6_EnhG;E010,7_Enh;E011,6_EnhG;E012,7_Enh;E013,6_EnhG;E014,7_Enh;E015,7_Enh;E016,7_Enh;E017,6_EnhG;E018,7_Enh;E019,7_Enh;E020,7_Enh;E021,7_Enh;E022,7_Enh;E023,7_Enh;E024,7_Enh;E025,7_Enh;E026,6_EnhG;E027,6_EnhG;E028,7_Enh;E029,7_Enh;E030,7_Enh;E034,6_EnhG;E036,6_EnhG;E046,7_Enh;E049,2_TssAFlnk;E050,7_Enh;E051,6_EnhG;E052,6_E…	E083,7_Enh;E095,7_Enh;E104,7_Enh;E105,7_Enh	E083;E100;E123	E083
108	previously not reported	UBE3B	12:109976893:G:T	rs2004359	12	109976893	G	T	12:109904318:C:T	rs918106	12	109904318	C	T	0.947858	E003,6_EnhG;E005,6_EnhG;E006,6_EnhG;E009,6_EnhG;E015,6_EnhG;E017,6_EnhG;E018,6_EnhG;E023,7_Enh;E025,6_EnhG;E026,6_EnhG;E027,6_EnhG;E028,6_EnhG;E034,6_EnhG;E046,6_EnhG;E049,6_EnhG;E052,6_EnhG;E055,6_EnhG;E056,3_TxFlnk;E059,6_EnhG;E061,6_EnhG;E062,6_EnhG;E063,6_EnhG;E065,7_Enh;E068,6_EnhG;E069,6_EnhG;E071,7_Enh;E072,6_EnhG;E073,6_EnhG;E074,7_Enh;E076,7_Enh;E077,6_EnhG;E078,6_EnhG;E079,6_EnhG;E080,6…	E083,7_Enh;E095,6_EnhG;E104,7_Enh;E105,6_EnhG	E003;E005;E083;E097;E120;E121	E083
108	previously not reported	UBE3B	12:109976893:G:T	rs2004359	12	109976893	G	T	12:109905368:A:C	rs6606725	12	109905368	C	A	0.882254	E005,6_EnhG;E006,6_EnhG;E015,6_EnhG;E022,6_EnhG;E023,6_EnhG;E025,6_EnhG;E026,6_EnhG;E027,6_EnhG;E028,6_EnhG;E046,6_EnhG;E049,6_EnhG;E052,6_EnhG;E055,6_EnhG;E056,6_EnhG;E063,6_EnhG;E065,6_EnhG;E067,6_EnhG;E068,6_EnhG;E069,6_EnhG;E073,6_EnhG;E075,7_Enh;E076,6_EnhG;E077,6_EnhG;E078,6_EnhG;E080,6_EnhG;E083,7_Enh;E089,6_EnhG;E090,6_EnhG;E091,6_EnhG;E092,6_EnhG;E095,6_EnhG;E096,6_EnhG;E097,6_EnhG;E100,…	E083,7_Enh;E095,6_EnhG;E104,7_Enh;E105,6_EnhG
108	previously not reported	UBE3B	12:109976893:G:T	rs2004359	12	109976893	G	T	12:109909011:A:G	rs2058804	12	109909011	A	G	0.952216	E025,6_EnhG;E027,7_Enh;E039,6_EnhG;E043,6_EnhG;E046,6_EnhG;E055,6_EnhG;E056,6_EnhG;E063,6_EnhG;E065,6_EnhG;E071,6_EnhG;E080,6_EnhG;E128,6_EnhG		E091
108	previously not reported	UBE3B	12:109976893:G:T	rs2004359	12	109976893	G	T	12:109920071:G:T	rs1543896	12	109920071	G	T	0.99012	E118,7_Enh
108	previously not reported	UBE3B	12:109976893:G:T	rs2004359	12	109976893	G	T	12:109925489:A:G	rs2241215	12	109925489	A	G	0.99012	E080,6_EnhG
108	previously not reported	UBE3B	12:109976893:G:T	rs2004359	12	109976893	G	T	12:109937534:A:G	rs7298565	12	109937534	G	A	1	E005,6_EnhG		E021
108	previously not reported	UBE3B	12:109976893:G:T	rs2004359	12	109976893	G	T	12:109938857:A:G	rs2241213	12	109938857	A	G	0.984596	E006,6_EnhG		E051
108	previously not reported	UBE3B	12:109976893:G:T	rs2004359	12	109976893	G	T	12:109950144:A:G	rs2241210	12	109950144	A	G	0.979609	E080,6_EnhG;E097,7_Enh;E113,6_EnhG		E097;E119
108	previously not reported	UBE3B	12:109976893:G:T	rs10675153	12	109976893	G	T	12:109957692:D:I		12	109957692	D	I	0.9838			E083;E122	E083
108	previously not reported	UBE3B	12:109976893:G:T	rs2004359	12	109976893	G	T	12:109957694:D:I	rs11442869	12	109957694	D	I	1	E005,6_EnhG;E013,6_EnhG;E017,6_EnhG;E023,7_Enh;E025,6_EnhG;E026,7_Enh;E049,7_Enh;E052,6_EnhG;E061,6_EnhG;E063,6_EnhG;E068,6_EnhG;E071,6_EnhG;E077,6_EnhG;E083,7_Enh;E090,6_EnhG;E091,6_EnhG;E095,7_Enh;E097,7_Enh;E104,7_Enh;E105,7_Enh;E107,6_EnhG;E108,6_EnhG;E113,6_EnhG;E122,7_Enh;E125,7_Enh;E126,7_Enh;E128,6_EnhG;E129,6_EnhG	E083,7_Enh;E095,7_Enh;E104,7_Enh;E105,7_Enh	E122
108	previously not reported	UBE3B	12:109976893:G:T	rs2004359	12	109976893	G	T	12:109960962:C:T	rs7956788	12	109960962	T	C	0.983192	E007,7_Enh;E012,7_Enh;E024,6_EnhG;E053,6_EnhG;E054,6_EnhG;E067,6_EnhG;E068,6_EnhG;E069,6_EnhG;E070,6_EnhG;E071,6_EnhG;E072,6_EnhG;E073,6_EnhG;E074,6_EnhG;E081,7_Enh;E082,6_EnhG;E083,7_Enh;E089,6_EnhG;E090,6_EnhG;E095,6_EnhG;E105,6_EnhG;E111,6_EnhG	E083,7_Enh;E095,6_EnhG;E105,6_EnhG	E007;E081;E082;E083;E089;E098;E121	E083
108	previously not reported	UBE3B	12:109976893:G:T	rs2004359	12	109976893	G	T	12:109962795:C:G	rs2241208	12	109962795	G	C	0.95009	E005,7_Enh;E007,7_Enh;E009,6_EnhG;E010,6_EnhG;E011,7_Enh;E012,7_Enh;E016,7_Enh;E024,6_EnhG;E083,7_Enh;E091,6_EnhG;E099,6_EnhG	E083,7_Enh	E007;E083	E083
108	previously not reported	UBE3B	12:109976893:G:T	rs2004359	12	109976893	G	T	12:109973273:C:T	rs2058807	12	109973273	T	C	1	E113,6_EnhG
108	previously not reported	UBE3B	12:109976893:G:T	rs2004359	12	109976893	G	T	12:109975211:A:T	rs1543897	12	109975211	A	T	0.979076	E083,7_Enh	E083,7_Enh	E118;E119;E124
108	previously not reported	UBE3B	12:109976893:G:T	rs2004359	12	109976893	G	T	12:109976893:G:T	rs2004359	12	109976893	G	T	1	E013,7_Enh;E017,7_Enh;E049,7_Enh;E052,7_Enh;E120,7_Enh;E125,7_Enh;E126,7_Enh
108	previously not reported	UBE3B	12:109976893:G:T	rs2004359	12	109976893	G	T	12:109980516:C:T	rs7956536	12	109980516	C	T	0.984596	E046,7_Enh;E052,7_Enh;E055,7_Enh;E056,7_Enh;E080,7_Enh;E118,7_Enh;E120,7_Enh;E121,7_Enh;E122,7_Enh		E021
108	previously not reported	UBE3B	12:109976893:G:T	rs2004359	12	109976893	G	T	12:109981184:D:I	rs5800864	12	109981184	D	I	0.905448	E046,7_Enh;E052,7_Enh;E055,7_Enh;E120,7_Enh;E121,7_Enh		E121
108	previously not reported	UBE3B	12:109976893:G:T	rs2004359	12	109976893	G	T	12:109981678:C:T	rs731178	12	109981678	C	T	0.983902	E046,7_Enh;E120,7_Enh;E121,7_Enh
108	previously not reported	UBE3B	12:109976893:G:T	rs2004359	12	109976893	G	T	12:109984561:A:G	rs6606732	12	109984561	G	A	0.983902	E046,7_Enh
108	previously not reported	UBE3B	12:109976893:G:T	rs2004359	12	109976893	G	T	12:109986918:C:G	rs888194	12	109986918	C	G	0.839214	E028,7_Enh;E046,7_Enh;E054,12_EnhBiv;E056,12_EnhBiv;E068,7_Enh;E071,7_Enh;E072,7_Enh;E118,12_EnhBiv		E059
108	previously not reported	UBE3B	12:109976893:G:T	rs1075467	12	109976893	G	T	12:109986935:A:G		12	109986935	G	A	0.983902			E059
108	previously not reported	UBE3B	12:109976893:G:T	rs2004359	12	109976893	G	T	12:109987838:A:G	rs4766611	12	109987838	A	G	0.980426	E006,12_EnhBiv;E007,7_Enh;E009,7_Enh;E010,7_Enh;E024,7_Enh;E046,7_Enh;E057,12_EnhBiv;E066,7_Enh;E084,12_EnhBiv;E085,12_EnhBiv;E089,12_EnhBiv;E118,12_EnhBiv		E003;E093
108	previously not reported	UBE3B	12:109976893:G:T	rs2004359	12	109976893	G	T	12:109988891:G:T	rs7304862	12	109988891	T	G	0.97763	E062,7_Enh		E114
108	previously not reported	UBE3B	12:109976893:G:T	rs10850358	12	109976893	G	T	12:109991050:A:G		12	109991050	A	G	0.975509			E003;E022;E080;E097;E109
108	previously not reported	UBE3B	12:109976893:G:T	rs2004359	12	109976893	G	T	12:109993603:A:C	rs11067231	12	109993603	C	A	0.975389	E005,7_Enh;E007,7_Enh;E022,7_Enh;E053,7_Enh;E054,7_Enh;E066,7_Enh;E080,7_Enh;E081,12_EnhBiv;E095,7_Enh;E098,7_Enh;E107,7_Enh;E108,7_Enh;E113,7_Enh;E118,7_Enh	E095,7_Enh	E022
108	previously not reported	UBE3B	12:109976893:G:T	rs2004359	12	109976893	G	T	12:109993976:C:G	rs877710	12	109993976	C	G	0.975389	E005,7_Enh;E007,7_Enh;E054,7_Enh;E066,7_Enh;E080,7_Enh;E081,7_Enh;E095,7_Enh;E098,7_Enh;E100,7_Enh;E104,7_Enh;E107,7_Enh;E108,7_Enh;E113,7_Enh;E118,7_Enh	E095,7_Enh;E104,7_Enh	E022;E080;E081;E082;E090
108	previously not reported	UBE3B	12:109976893:G:T	rs2004359	12	109976893	G	T	12:109994870:A:T	rs9593	12	109994870	A	T	0.975389	E022,6_EnhG;E066,7_Enh;E080,6_EnhG;E098,7_Enh		E034
108	previously not reported	UBE3B	12:109976893:G:T	rs2004359	12	109976893	G	T	12:109995097:A:G	rs888192	12	109995097	A	G	0.975389	E022,6_EnhG;E066,7_Enh;E079,7_Enh;E080,6_EnhG;E089,6_EnhG;E098,7_Enh		E080;E089;E109;E121
108	previously not reported	UBE3B	12:109976893:G:T	rs2004359	12	109976893	G	T	12:109996343:A:C	rs2058806	12	109996343	C	A	0.97397	E006,7_Enh;E056,6_EnhG;E066,7_Enh;E075,7_Enh;E077,7_Enh;E079,6_EnhG;E080,6_EnhG;E084,7_Enh;E085,6_EnhG;E101,7_Enh;E102,7_Enh;E106,7_Enh;E118,6_EnhG;E125,7_Enh		E109
108	previously not reported	UBE3B	12:109976893:G:T	rs2004359	12	109976893	G	T	12:109997645:C:G	rs7964021	12	109997645	G	C	0.941122	E059,6_EnhG;E066,6_EnhG
108	previously not reported	UBE3B	12:109976893:G:T	rs2004359	12	109976893	G	T	12:109998097:A:G	rs7953014	12	109998097	A	G	0.971155	E059,6_EnhG;E066,6_EnhG		E080
108	previously not reported	UBE3B	12:109976893:G:T	rs2004359	12	109976893	G	T	12:109998591:C:T	rs2058805	12	109998591	T	C	0.986617	E022,6_EnhG;E059,6_EnhG;E061,7_Enh;E071,7_Enh;E072,6_EnhG;E074,6_EnhG		E034;E059;E080;E081
108	previously not reported	UBE3B	12:109976893:G:T	rs2004359	12	109976893	G	T	12:110000193:C:T	rs7134594	12	110000193	C	T	0.970458	E059,6_EnhG
108	previously not reported	UBE3B	12:109976893:G:T	rs2004359	12	109976893	G	T	12:110001195:A:G	rs736344	12	110001195	A	G	0.971174	E026,7_Enh;E049,7_Enh;E059,6_EnhG;E073,6_EnhG;E095,7_Enh;E105,6_EnhG;E129,7_Enh	E095,7_Enh;E105,6_EnhG
108	previously not reported	UBE3B	12:109976893:G:T	rs2004359	12	109976893	G	T	12:110004960:C:T	rs874170	12	110004960	C	T	0.981687	E066,6_EnhG
108	previously not reported	UBE3B	12:109976893:G:T	rs2004359	12	109976893	G	T	12:110013639:G:T	rs6606734	12	110013639	T	G	0.851258	E005,6_EnhG;E006,6_EnhG;E009,6_EnhG;E013,6_EnhG;E024,6_EnhG;E028,6_EnhG;E043,6_EnhG;E057,6_EnhG;E058,6_EnhG;E061,6_EnhG;E066,2_TssAFlnk;E075,6_EnhG;E079,6_EnhG;E080,6_EnhG;E094,7_Enh;E096,6_EnhG;E110,7_Enh;E115,6_EnhG;E116,6_EnhG;E118,6_EnhG;E119,6_EnhG		E094
108	previously not reported	UBE3B	12:109976893:G:T	rs2004359	12	109976893	G	T	12:110015893:A:G	rs7954144	12	110015893	A	G	0.981687	E006,6_EnhG;E066,6_EnhG;E086,7_Enh;E118,6_EnhG
109	previously not reported	TESC	12:117491824:A:G	rs10850747	12	117491824	A	G	12:117490510:A:G		12	117490510	A	G	0.969483			E083;E116	E083
109	previously not reported	TESC	12:117491824:A:G	rs7972416	12	117491824	A	G	12:117491201:C:T	rs6490105	12	117491201	T	C	0.969483	E001,7_Enh;E002,7_Enh;E003,7_Enh;E009,7_Enh;E010,7_Enh;E011,7_Enh;E014,7_Enh;E015,7_Enh;E016,7_Enh;E018,7_Enh;E019,7_Enh;E020,7_Enh;E021,7_Enh;E022,7_Enh;E024,7_Enh;E027,7_Enh;E029,7_Enh;E030,7_Enh;E032,7_Enh;E036,6_EnhG;E068,1_TssA;E080,7_Enh;E083,7_Enh;E093,7_Enh;E095,7_Enh;E098,7_Enh;E105,7_Enh;E107,12_EnhBiv;E110,7_Enh;E116,7_Enh;E124,7_Enh	E083,7_Enh;E095,7_Enh;E105,7_Enh	E003;E083	E083
109	previously not reported	TESC	12:117491824:A:G	rs7972416	12	117491824	A	G	12:117491536:C:T	rs6490106	12	117491536	C	T	0.953795	E002,7_Enh;E003,7_Enh;E010,7_Enh;E014,7_Enh;E016,7_Enh;E018,7_Enh;E019,7_Enh;E021,7_Enh;E022,7_Enh;E024,7_Enh;E029,7_Enh;E030,7_Enh;E032,7_Enh;E036,6_EnhG;E068,1_TssA;E080,7_Enh;E081,7_Enh;E083,7_Enh;E093,7_Enh;E095,7_Enh;E098,7_Enh;E105,7_Enh;E110,7_Enh;E113,7_Enh;E116,7_Enh;E124,7_Enh	E083,7_Enh;E095,7_Enh;E105,7_Enh	E033;E050;E083;E093;E118	E083
109	previously not reported	TESC	12:117491824:A:G	rs7972416	12	117491824	A	G	12:117491548:C:T	rs6490107	12	117491548	C	T	0.970141	E002,7_Enh;E003,7_Enh;E010,7_Enh;E014,7_Enh;E016,7_Enh;E018,7_Enh;E019,7_Enh;E021,7_Enh;E022,7_Enh;E024,7_Enh;E029,7_Enh;E030,7_Enh;E032,7_Enh;E036,6_EnhG;E068,1_TssA;E080,7_Enh;E081,7_Enh;E083,7_Enh;E093,7_Enh;E095,7_Enh;E098,7_Enh;E105,7_Enh;E110,7_Enh;E113,7_Enh;E116,7_Enh;E124,7_Enh	E083,7_Enh;E095,7_Enh;E105,7_Enh	E050;E083;E093;E118	E083
109	previously not reported	TESC	12:117491824:A:G	rs7972416	12	117491824	A	G	12:117491824:A:G	rs7972416	12	117491824	A	G	1	E024,7_Enh;E029,7_Enh;E030,7_Enh;E036,6_EnhG;E083,7_Enh;E098,6_EnhG;E105,7_Enh;E113,7_Enh;E124,7_Enh	E083,7_Enh;E105,7_Enh	E022;E083;E088	E083
109	previously not reported	TESC	12:117491824:A:G	rs7972416	12	117491824	A	G	12:117492256:A:G	rs11837022	12	117492256	G	A	0.996305	E029,7_Enh;E030,7_Enh;E036,6_EnhG;E083,7_Enh;E098,6_EnhG;E124,7_Enh	E083,7_Enh	E114
109	previously not reported	TESC	12:117491824:A:G	rs7972416	12	117491824	A	G	12:117493071:C:G	rs11611741	12	117493071	C	G	0.972389	E030,7_Enh;E036,6_EnhG;E083,7_Enh	E083,7_Enh
110	previously not reported	FREM2	13:39261151:G:T	rs9634754	13	39261151	T	G	13:39237319:C:T	rs2442343	13	39237319	T	C	0.856069	E025,7_Enh;E053,7_Enh;E054,7_Enh;E080,7_Enh;E083,7_Enh;E088,7_Enh;E097,7_Enh	E083,7_Enh
110	previously not reported	FREM2	13:39261151:G:T	rs9634754	13	39261151	T	G	13:39238669:C:T	rs930659	13	39238669	C	T	0.876249	E053,7_Enh;E054,7_Enh;E088,7_Enh;E127,7_Enh		E059
110	previously not reported	FREM2	13:39261151:G:T	rs2122208	13	39261151	T	G	13:39242025:A:T		13	39242025	T	A	0.857385			E057;E081;E082;E088
110	previously not reported	FREM2	13:39261151:G:T	rs9634754	13	39261151	T	G	13:39245188:A:T	rs2197879	13	39245188	A	T	0.879408	E023,7_Enh;E027,7_Enh;E053,7_Enh;E111,7_Enh		E057
110	previously not reported	FREM2	13:39261151:G:T	rs9634754	13	39261151	T	G	13:39246126:A:G	rs2442379	13	39246126	A	G	0.880779	E025,7_Enh;E103,7_Enh;E111,7_Enh
110	previously not reported	FREM2	13:39261151:G:T	rs9634754	13	39261151	T	G	13:39255703:D:I	rs5802953	13	39255703	I	A	0.997334	E005,7_Enh;E009,7_Enh;E023,7_Enh;E054,7_Enh;E063,7_Enh;E076,7_Enh;E080,7_Enh		E080
110	previously not reported	FREM2	13:39261151:G:T	rs9634754	13	39261151	T	G	13:39256023:C:T	rs2496418	13	39256023	C	T	0.959187	E023,7_Enh;E080,7_Enh		E080
110	previously not reported	FREM2	13:39261151:G:T	rs9634754	13	39261151	T	G	13:39260130:A:G	rs2442373	13	39260130	A	G	0.911535	E001,1_TssA;E002,1_TssA;E003,1_TssA;E009,1_TssA;E010,2_TssAFlnk;E011,1_TssA;E012,1_TssA;E013,1_TssA;E014,1_TssA;E015,1_TssA;E016,1_TssA;E018,1_TssA;E019,1_TssA;E020,1_TssA;E024,1_TssA;E027,2_TssAFlnk;E028,7_Enh;E050,12_EnhBiv;E053,2_TssAFlnk;E054,1_TssA;E057,7_Enh;E061,7_Enh;E065,1_TssA;E066,7_Enh;E070,7_Enh;E071,7_Enh;E080,7_Enh;E083,2_TssAFlnk;E084,1_TssA;E085,2_TssAFlnk;E086,1_TssA;E088,12_Enh…	E083,2_TssAFlnk	E008;E050;E059;E082;E086;E088;E090;E091;E109;E127
110	previously not reported	FREM2	13:39261151:G:T	rs9634754	13	39261151	T	G	13:39261151:G:T	rs9634754	13	39261151	T	G	1	E001,1_TssA;E002,1_TssA;E003,1_TssA;E004,1_TssA;E005,1_TssA;E006,2_TssAFlnk;E007,1_TssA;E008,1_TssA;E009,1_TssA;E010,1_TssA;E011,1_TssA;E012,1_TssA;E013,1_TssA;E014,1_TssA;E015,1_TssA;E016,1_TssA;E018,1_TssA;E019,1_TssA;E020,1_TssA;E021,1_TssA;E022,1_TssA;E023,2_TssAFlnk;E024,1_TssA;E025,10_TssBiv;E026,10_TssBiv;E027,1_TssA;E028,1_TssA;E032,12_EnhBiv;E034,12_EnhBiv;E035,10_TssBiv;E036,10_TssBiv;E…	E083,1_TssA;E095,1_TssA;E104,1_TssA;E105,1_TssA	E003;E004;E005;E006;E007;E008;E021;E022;E028;E050;E051;E057;E059;E080;E081;E082;E083;E084;E085;E086;E088;E089;E090;E091;E092;E093;E097;E098;E100;E109;E114;E119;E125;E127;E128	E083
110	previously not reported	FREM2	13:39261151:G:T	rs9634754	13	39261151	T	G	13:39264690:C:T	rs2496425	13	39264690	T	C	0.819128	E080,1_TssA;E108,6_EnhG		E091;E127
111	previously not reported	FGF14	13:102878269:C:T	rs9513995	13	102878269	C	T	13:102865481:A:G	rs1413086	13	102865481	A	G	0.91441	E001,7_Enh;E003,7_Enh;E004,7_Enh;E009,7_Enh;E010,7_Enh;E012,7_Enh;E014,7_Enh;E015,7_Enh;E016,7_Enh;E018,7_Enh;E019,7_Enh;E020,7_Enh;E024,7_Enh;E053,7_Enh;E054,7_Enh;E088,7_Enh		E021;E022
111	previously not reported	FGF14	13:102878269:C:T	rs9513995	13	102878269	C	T	13:102865676:A:G	rs1413087	13	102865676	A	G	0.899124	E001,7_Enh;E003,7_Enh;E009,7_Enh;E010,7_Enh;E012,7_Enh;E014,7_Enh;E015,7_Enh;E016,7_Enh;E018,7_Enh;E019,7_Enh;E020,7_Enh;E024,7_Enh;E053,7_Enh;E054,7_Enh
111	previously not reported	FGF14	13:102878269:C:T	rs1928513	13	102878269	C	T	13:102872104:A:G		13	102872104	G	A	0.813132			E082
111	previously not reported	FGF14	13:102878269:C:T	rs9518662	13	102878269	C	T	13:102873409:C:T		13	102873409	C	T	0.87421			E005
111	previously not reported	FGF14	13:102878269:C:T	rs9513995	13	102878269	C	T	13:102878269:C:T	rs9513995	13	102878269	C	T	1	E066,7_Enh
111	previously not reported	FGF14	13:102878269:C:T	rs9513995	13	102878269	C	T	13:102878419:C:T	rs1336695	13	102878419	C	T	0.998643	E066,7_Enh
111	previously not reported	FGF14	13:102878269:C:T	rs9513995	13	102878269	C	T	13:102878449:C:G	rs1336693	13	102878449	G	C	0.919629	E066,7_Enh
111	previously not reported	FGF14	13:102878269:C:T	rs1336691	13	102878269	C	T	13:102880121:A:G		13	102880121	G	A	0.866052			E082
111	previously not reported	FGF14	13:102878269:C:T	rs9513995	13	102878269	C	T	13:102881101:C:T	rs1952608	13	102881101	T	C	0.867328	E087,7_Enh
111	previously not reported	FGF14	13:102878269:C:T	rs9513995	13	102878269	C	T	13:102884015:A:G	rs7317530	13	102884015	G	A	0.867328	E066,7_Enh		E119
111	previously not reported	FGF14	13:102878269:C:T	rs9513995	13	102878269	C	T	13:102888367:C:T	rs2149865	13	102888367	T	C	0.86208	E014,7_Enh;E016,7_Enh;E066,7_Enh;E087,7_Enh;E091,7_Enh;E118,7_Enh		E119
111	previously not reported	FGF14	13:102878269:C:T	rs9513995	13	102878269	C	T	13:102891966:A:T	rs3904750	13	102891966	T	A	0.86224	E025,7_Enh;E061,7_Enh
111	previously not reported	FGF14	13:102878269:C:T	rs7989386	13	102878269	C	T	13:102910234:A:C		13	102910234	A	C	0.827737			E022
111	previously not reported	FGF14	13:102878269:C:T	rs9513995	13	102878269	C	T	13:102911464:A:T	rs1336715	13	102911464	A	T	0.827961	E068,7_Enh
112	previously not reported	ARHGEF40	14:21545230:A:G	rs12885183	14	21545230	A	G	14:21544274:C:T	rs1243473	14	21544274	T	C	0.849183	E113,6_EnhG;E118,6_EnhG
112	previously not reported	ARHGEF40	14:21545230:A:G	rs12885183	14	21545230	A	G	14:21548158:A:G	rs3827910	14	21548158	A	G	0.867075	E030,7_Enh		E055;E056
112	previously not reported	ARHGEF40	14:21545230:A:G	rs12885183	14	21545230	A	G	14:21553545:A:T	rs12885295	14	21553545	T	A	0.858649	E006,6_EnhG;E017,6_EnhG;E023,6_EnhG;E025,6_EnhG;E026,6_EnhG;E027,6_EnhG;E028,7_Enh;E029,6_EnhG;E030,2_TssAFlnk;E055,3_TxFlnk;E056,6_EnhG;E057,6_EnhG;E058,6_EnhG;E063,6_EnhG;E066,6_EnhG;E076,6_EnhG;E077,6_EnhG;E080,6_EnhG;E083,7_Enh;E084,6_EnhG;E085,6_EnhG;E094,6_EnhG;E095,6_EnhG;E099,6_EnhG;E105,6_EnhG;E110,7_Enh;E113,6_EnhG;E114,6_EnhG;E118,6_EnhG;E119,7_Enh;E121,6_EnhG;E124,6_EnhG;E125,6_EnhG;E…	E083,7_Enh;E095,6_EnhG;E105,6_EnhG	E029;E055;E057;E083;E084;E085;E088;E092;E109;E124;E126	E083
114	previously not reported	AKAP6	14:32923336:A:G	rs10130628	14	32923336	G	A	14:32908548:A:G		14	32908548	A	G	0.825374			E118
114	previously not reported	AKAP6	14:32923336:A:G	rs3784192	14	32923336	G	A	14:32922842:C:G	rs8005914	14	32922842	G	C	0.951703	E005,7_Enh;E057,7_Enh;E076,7_Enh;E083,7_Enh;E088,7_Enh	E083,7_Enh
114	previously not reported	AKAP6	14:32923336:A:G	rs3784192	14	32923336	G	A	14:32922993:C:T	rs8010075	14	32922993	C	T	0.990593	E005,7_Enh;E057,7_Enh;E076,7_Enh;E083,7_Enh;E088,7_Enh	E083,7_Enh
114	previously not reported	AKAP6	14:32923336:A:G	rs3784192	14	32923336	G	A	14:32923080:C:T	rs8011444	14	32923080	T	C	0.849704	E005,7_Enh;E028,7_Enh;E057,7_Enh;E076,7_Enh;E083,7_Enh;E088,7_Enh;E118,7_Enh	E083,7_Enh	E057;E091;E119;E121;E126
114	previously not reported	AKAP6	14:32923336:A:G	rs3784192	14	32923336	G	A	14:32923336:A:G	rs3784192	14	32923336	G	A	1	E005,7_Enh;E025,7_Enh;E026,7_Enh;E027,7_Enh;E028,7_Enh;E052,2_TssAFlnk;E057,2_TssAFlnk;E061,7_Enh;E072,7_Enh;E076,7_Enh;E080,7_Enh;E083,2_TssAFlnk;E088,7_Enh;E103,7_Enh;E104,7_Enh;E118,7_Enh;E119,7_Enh;E127,7_Enh;E129,7_Enh	E083,2_TssAFlnk;E104,7_Enh	E005;E006;E028;E055;E056;E057;E059;E083;E084;E086;E091;E100;E119;E120;E121;E126;E127	E083
114	previously not reported	AKAP6	14:32923336:A:G	rs3784192	14	32923336	G	A	14:32923441:A:T	rs3784193	14	32923441	T	A	0.863699	E005,7_Enh;E023,7_Enh;E025,7_Enh;E026,7_Enh;E027,7_Enh;E028,7_Enh;E052,2_TssAFlnk;E055,7_Enh;E057,7_Enh;E058,7_Enh;E061,7_Enh;E072,7_Enh;E076,7_Enh;E080,7_Enh;E083,7_Enh;E088,7_Enh;E103,7_Enh;E104,7_Enh;E111,7_Enh;E118,7_Enh;E119,7_Enh;E120,7_Enh;E127,7_Enh;E129,7_Enh	E083,7_Enh;E104,7_Enh	E006;E021;E057;E059;E083;E091;E126	E083
114	previously not reported	AKAP6	14:32923336:A:G	rs3784192	14	32923336	G	A	14:32923626:C:T	rs3784194	14	32923626	C	T	0.969188	E005,7_Enh;E013,7_Enh;E021,7_Enh;E022,7_Enh;E023,7_Enh;E025,7_Enh;E026,7_Enh;E027,7_Enh;E028,7_Enh;E052,7_Enh;E055,7_Enh;E057,2_TssAFlnk;E058,7_Enh;E059,7_Enh;E061,7_Enh;E072,7_Enh;E073,7_Enh;E076,7_Enh;E080,7_Enh;E083,2_TssAFlnk;E088,7_Enh;E104,7_Enh;E111,7_Enh;E118,7_Enh;E119,7_Enh;E120,7_Enh;E127,7_Enh;E129,7_Enh	E083,2_TssAFlnk;E104,7_Enh	E006;E017;E028;E055;E056;E057;E059;E080;E083;E091;E100;E119;E121;E126;E127	E083
114	previously not reported	AKAP6	14:32923336:A:G	rs3784192	14	32923336	G	A	14:32923677:C:T	rs3825751	14	32923677	C	T	0.96975	E005,7_Enh;E013,7_Enh;E021,7_Enh;E022,7_Enh;E023,7_Enh;E025,7_Enh;E026,7_Enh;E027,7_Enh;E028,7_Enh;E052,7_Enh;E055,7_Enh;E057,2_TssAFlnk;E058,7_Enh;E059,7_Enh;E061,7_Enh;E072,7_Enh;E073,7_Enh;E076,7_Enh;E080,7_Enh;E083,2_TssAFlnk;E088,7_Enh;E104,7_Enh;E111,7_Enh;E118,7_Enh;E119,7_Enh;E120,7_Enh;E127,7_Enh;E129,7_Enh	E083,2_TssAFlnk;E104,7_Enh	E006;E028;E055;E057;E059;E080;E083;E091;E100;E119;E126	E083
114	previously not reported	AKAP6	14:32923336:A:G	rs145451266	14	32923336	G	A	14:32923824:D:I		14	32923824	D	I	0.847402			E083	E083
114	previously not reported	AKAP6	14:32923336:A:G	rs3784192	14	32923336	G	A	14:32925334:A:G	rs28594748	14	32925334	G	A	0.920094	E083,7_Enh;E103,7_Enh	E083,7_Enh
114	previously not reported	AKAP6	14:32923336:A:G	rs3784192	14	32923336	G	A	14:32925732:G:T	rs28504132	14	32925732	T	G	0.916746	E083,7_Enh;E103,7_Enh	E083,7_Enh
114	previously not reported	AKAP6	14:32923336:A:G	rs3784192	14	32923336	G	A	14:32926953:G:T	rs1957022	14	32926953	T	G	0.890586	E001,7_Enh;E013,7_Enh;E017,7_Enh;E026,7_Enh;E049,7_Enh;E052,7_Enh;E068,7_Enh;E071,7_Enh;E074,7_Enh;E083,7_Enh;E088,7_Enh;E103,7_Enh;E111,7_Enh;E126,7_Enh;E128,7_Enh;E129,7_Enh	E083,7_Enh	E004;E005;E006;E017;E055;E056;E083;E088;E091;E092;E097;E120;E121;E125;E126;E128	E083
114	previously not reported	AKAP6	14:32923336:A:G	rs6571521	14	32923336	G	A	14:32928828:C:T		14	32928828	C	T	0.876707			E090
115	previously not reported	NFKBIA	14:35871217:A:G	rs8904	14	35871217	G	A	14:35871093:C:T	rs696	14	35871093	C	T	0.968533	E004,1_TssA;E005,6_EnhG;E006,6_EnhG;E011,3_TxFlnk;E013,6_EnhG;E015,3_TxFlnk;E017,3_TxFlnk;E023,3_TxFlnk;E024,6_EnhG;E025,3_TxFlnk;E026,3_TxFlnk;E027,3_TxFlnk;E028,3_TxFlnk;E029,3_TxFlnk;E030,3_TxFlnk;E031,3_TxFlnk;E032,3_TxFlnk;E033,3_TxFlnk;E034,3_TxFlnk;E035,3_TxFlnk;E036,3_TxFlnk;E037,3_TxFlnk;E038,3_TxFlnk;E039,3_TxFlnk;E040,3_TxFlnk;E041,3_TxFlnk;E042,3_TxFlnk;E043,3_TxFlnk;E044,3_TxFlnk;E04…	E083,7_Enh;E095,3_TxFlnk;E104,1_TssA;E105,3_TxFlnk	E033;E034;E046;E080;E097;E109;E116;E119;E124
115	previously not reported	NFKBIA	14:35871217:A:G	rs8904	14	35871217	G	A	14:35871217:A:G	rs8904	14	35871217	G	A	1	E004,1_TssA;E005,6_EnhG;E006,6_EnhG;E011,3_TxFlnk;E013,6_EnhG;E015,3_TxFlnk;E017,3_TxFlnk;E018,6_EnhG;E023,3_TxFlnk;E024,6_EnhG;E025,3_TxFlnk;E026,3_TxFlnk;E028,3_TxFlnk;E029,3_TxFlnk;E030,3_TxFlnk;E031,3_TxFlnk;E032,3_TxFlnk;E033,3_TxFlnk;E034,3_TxFlnk;E035,3_TxFlnk;E036,3_TxFlnk;E037,3_TxFlnk;E038,3_TxFlnk;E039,3_TxFlnk;E040,3_TxFlnk;E041,3_TxFlnk;E042,3_TxFlnk;E043,3_TxFlnk;E044,3_TxFlnk;E045,…	E083,7_Enh;E095,3_TxFlnk;E104,1_TssA;E105,3_TxFlnk	E006;E017;E028;E029;E033;E034;E046;E055;E056;E057;E080;E083;E086;E088;E089;E090;E092;E097;E098;E100;E109;E119;E120;E121;E122;E124;E125;E126	E083
116	previously not reported	SYNE2	14:64457638:G:T	rs1255908	14	64457638	T	G	14:64404187:A:T	rs61984073	14	64404187	T	A	0.803649	E033,7_Enh;E034,7_Enh;E037,7_Enh;E038,7_Enh;E039,7_Enh;E040,7_Enh;E041,7_Enh;E042,7_Enh;E043,7_Enh;E044,7_Enh;E045,7_Enh;E047,7_Enh;E048,7_Enh;E079,7_Enh;E091,7_Enh;E094,7_Enh;E095,7_Enh;E105,7_Enh;E112,6_EnhG;E113,7_Enh;E115,7_Enh;E116,2_TssAFlnk	E095,7_Enh;E105,7_Enh
116	previously not reported	SYNE2	14:64457638:G:T	rs1255908	14	64457638	T	G	14:64404436:C:G	rs2094833	14	64404436	G	C	0.803059	E033,7_Enh;E034,7_Enh;E037,7_Enh;E038,7_Enh;E039,7_Enh;E040,7_Enh;E041,7_Enh;E042,7_Enh;E043,7_Enh;E044,7_Enh;E046,7_Enh;E047,7_Enh;E048,7_Enh;E057,7_Enh;E059,7_Enh;E061,7_Enh;E091,7_Enh;E094,7_Enh;E113,7_Enh;E115,7_Enh;E116,2_TssAFlnk;E119,7_Enh
116	previously not reported	SYNE2	14:64457638:G:T	rs1255908	14	64457638	T	G	14:64408135:A:C	rs2184292	14	64408135	A	C	0.804115	E033,7_Enh;E037,7_Enh;E038,7_Enh;E039,7_Enh;E040,7_Enh;E041,7_Enh;E042,6_EnhG;E043,7_Enh;E044,7_Enh;E047,7_Enh;E048,7_Enh;E087,7_Enh		E034
116	previously not reported	SYNE2	14:64457638:G:T	rs1255908	14	64457638	T	G	14:64420998:A:G	rs1255873	14	64420998	A	G	0.81052	E001,7_Enh;E003,7_Enh;E014,7_Enh;E015,7_Enh;E016,6_EnhG;E018,7_Enh;E019,7_Enh;E021,7_Enh		E127
116	previously not reported	SYNE2	14:64457638:G:T	rs2792201	14	64457638	T	G	14:64423187:A:C		14	64423187	C	A	0.808596			E017;E028;E055;E056;E057;E119;E120;E121;E125;E126;E127;E128
116	previously not reported	SYNE2	14:64457638:G:T	rs1255877	14	64457638	T	G	14:64425415:C:G		14	64425415	G	C	0.800611			E034
116	previously not reported	SYNE2	14:64457638:G:T	rs1255879	14	64457638	T	G	14:64425742:C:T		14	64425742	C	T	0.844489			E032
116	previously not reported	SYNE2	14:64457638:G:T	rs1255908	14	64457638	T	G	14:64429351:A:C	rs1255885	14	64429351	A	C	0.876239	E080,7_Enh;E082,7_Enh;E088,7_Enh;E092,7_Enh		E088
116	previously not reported	SYNE2	14:64457638:G:T	rs1255908	14	64457638	T	G	14:64430267:G:T	rs1255887	14	64430267	G	T	0.876239	E003,7_Enh;E008,7_Enh;E014,7_Enh;E015,7_Enh;E016,7_Enh;E018,7_Enh;E019,7_Enh;E020,7_Enh;E052,7_Enh;E081,7_Enh;E082,7_Enh;E083,7_Enh;E086,7_Enh;E087,7_Enh;E088,7_Enh;E092,7_Enh;E101,7_Enh;E102,7_Enh;E103,7_Enh;E106,7_Enh;E110,7_Enh	E083,7_Enh	E081;E082;E088
116	previously not reported	SYNE2	14:64457638:G:T	rs1255908	14	64457638	T	G	14:64439841:A:G	rs1262237	14	64439841	G	A	0.851347	E078,7_Enh;E082,7_Enh;E092,7_Enh;E097,7_Enh;E116,7_Enh
116	previously not reported	SYNE2	14:64457638:G:T	rs1255908	14	64457638	T	G	14:64441477:D:I	rs72348396	14	64441477	I	C	0.913585	E061,7_Enh
116	previously not reported	SYNE2	14:64457638:G:T	rs1255908	14	64457638	T	G	14:64442639:G:T	rs1272156	14	64442639	G	T	0.874692	E059,7_Enh
116	previously not reported	SYNE2	14:64457638:G:T	rs1255908	14	64457638	T	G	14:64448080:D:I	rs142668183	14	64448080	D	I	0.950822	E116,7_Enh
116	previously not reported	SYNE2	14:64457638:G:T	rs1255900	14	64457638	T	G	14:64450120:A:G		14	64450120	A	G	0.951498			E127
116	previously not reported	SYNE2	14:64457638:G:T	rs1255908	14	64457638	T	G	14:64458960:D:I	rs34907122	14	64458960	D	I	0.833317	E027,7_Enh;E046,6_EnhG;E058,7_Enh;E079,6_EnhG;E116,6_EnhG
117	previously not reported	FLRT2	14:86041160:A:G	rs17712080	14	86041160	G	A	14:86033518:D:I	rs35403029	14	86033518	I	G	0.936754	E017,7_Enh;E023,7_Enh;E025,7_Enh;E026,7_Enh;E028,7_Enh;E049,7_Enh;E052,7_Enh;E055,7_Enh;E057,7_Enh;E058,7_Enh;E061,7_Enh;E071,7_Enh;E080,7_Enh;E082,7_Enh;E090,6_EnhG;E097,7_Enh;E098,7_Enh;E108,7_Enh;E119,7_Enh;E120,7_Enh;E121,7_Enh;E122,7_Enh;E125,7_Enh;E126,7_Enh;E127,7_Enh;E128,7_Enh;E129,7_Enh		E127
117	previously not reported	FLRT2	14:86041160:A:G	rs17712080	14	86041160	G	A	14:86033979:A:T	rs7154489	14	86033979	A	T	0.844035	E017,7_Enh;E025,7_Enh;E052,7_Enh;E055,7_Enh;E098,7_Enh;E119,7_Enh;E121,7_Enh;E122,7_Enh;E125,7_Enh;E126,7_Enh;E127,6_EnhG;E128,7_Enh;E129,7_Enh
117	previously not reported	FLRT2	14:86041160:A:G	rs17712080	14	86041160	G	A	14:86041160:A:G	rs17712080	14	86041160	G	A	1	E001,7_Enh;E012,7_Enh;E013,6_EnhG;E014,7_Enh;E015,7_Enh;E016,7_Enh;E018,7_Enh;E019,7_Enh;E020,7_Enh;E025,7_Enh;E026,7_Enh;E027,7_Enh;E028,7_Enh;E049,7_Enh;E052,7_Enh;E083,7_Enh;E107,7_Enh;E119,7_Enh;E120,7_Enh;E121,7_Enh	E083,7_Enh
117	previously not reported	FLRT2	14:86041160:A:G	rs17712080	14	86041160	G	A	14:86044090:A:C	rs61992706	14	86044090	C	A	0.94057	E003,7_Enh;E005,7_Enh;E013,6_EnhG;E015,7_Enh;E017,7_Enh;E024,7_Enh;E025,6_EnhG;E049,7_Enh;E052,7_Enh;E053,7_Enh;E055,7_Enh;E059,7_Enh;E061,7_Enh;E066,7_Enh;E068,7_Enh;E069,7_Enh;E070,7_Enh;E072,7_Enh;E073,7_Enh;E080,6_EnhG;E081,7_Enh;E082,7_Enh;E083,7_Enh;E090,6_EnhG;E098,6_EnhG;E104,7_Enh;E107,7_Enh;E108,7_Enh;E120,7_Enh;E121,7_Enh;E122,7_Enh;E125,7_Enh;E129,7_Enh	E083,7_Enh;E104,7_Enh	E083	E083
117	previously not reported	FLRT2	14:86041160:A:G	rs17712080	14	86041160	G	A	14:86044520:D:I	rs34699317	14	86044520	I	A	0.905836	E005,7_Enh;E013,6_EnhG;E049,7_Enh;E061,7_Enh;E066,7_Enh;E069,7_Enh;E070,7_Enh;E073,7_Enh;E080,6_EnhG;E081,7_Enh;E083,7_Enh;E090,6_EnhG;E098,6_EnhG;E107,7_Enh;E108,7_Enh;E121,7_Enh	E083,7_Enh
117	previously not reported	FLRT2	14:86041160:A:G	rs10483979	14	86041160	G	A	14:86045291:A:T		14	86045291	A	T	0.844007			E005
117	previously not reported	FLRT2	14:86041160:A:G	rs17712080	14	86041160	G	A	14:86045620:C:T	rs12587114	14	86045620	T	C	0.81098	E005,7_Enh;E013,7_Enh;E026,7_Enh;E049,7_Enh;E053,7_Enh;E054,7_Enh;E069,7_Enh;E070,7_Enh;E073,7_Enh;E081,7_Enh;E090,6_EnhG;E107,7_Enh;E121,7_Enh;E129,7_Enh
117	previously not reported	FLRT2	14:86041160:A:G	rs17712080	14	86041160	G	A	14:86045809:A:G	rs61992726	14	86045809	G	A	0.83014	E005,7_Enh;E013,7_Enh;E026,7_Enh;E049,7_Enh;E053,7_Enh;E054,7_Enh;E069,7_Enh;E070,7_Enh;E073,7_Enh;E081,7_Enh;E090,7_Enh;E121,7_Enh;E129,7_Enh
117	previously not reported	FLRT2	14:86041160:A:G	rs17712080	14	86041160	G	A	14:86045899:A:G	rs55989920	14	86045899	G	A	0.818312	E005,7_Enh;E013,7_Enh;E026,7_Enh;E049,7_Enh;E053,7_Enh;E054,7_Enh;E069,7_Enh;E070,7_Enh;E073,7_Enh;E081,7_Enh;E090,7_Enh;E121,7_Enh;E129,7_Enh
117	previously not reported	FLRT2	14:86041160:A:G	rs17712080	14	86041160	G	A	14:86048187:A:G	rs1473706	14	86048187	G	A	0.804755	E049,7_Enh;E097,7_Enh;E120,7_Enh;E121,7_Enh
118	previously not reported	RP11-1070N10.3	14:95983975:A:G	rs179145	14	95983975	G	A	14:95983975:A:G	rs179145	14	95983975	G	A	1	E006,7_Enh;E007,12_EnhBiv;E009,12_EnhBiv;E012,12_EnhBiv;E013,7_Enh;E015,12_EnhBiv;E017,7_Enh;E018,11_BivFlnk;E021,12_EnhBiv;E022,12_EnhBiv;E023,2_TssAFlnk;E025,2_TssAFlnk;E026,7_Enh;E027,7_Enh;E029,7_Enh;E030,7_Enh;E031,7_Enh;E032,7_Enh;E033,7_Enh;E034,7_Enh;E035,2_TssAFlnk;E036,7_Enh;E037,7_Enh;E038,7_Enh;E039,7_Enh;E040,7_Enh;E041,7_Enh;E042,7_Enh;E043,7_Enh;E044,7_Enh;E045,7_Enh;E046,7_Enh;E04…	E083,7_Enh;E095,7_Enh;E104,7_Enh;E105,7_Enh	E006;E008;E032;E055;E056;E083;E084;E085;E089;E090;E091;E092;E093;E097;E098;E109;E121	E083
119	previously not reported	MARK3	14:103851272:A:G	rs3759579	14	103851272	A	G	14:103851272:A:G	rs3759579	14	103851272	A	G	1	E001,1_TssA;E002,1_TssA;E003,1_TssA;E004,1_TssA;E005,2_TssAFlnk;E006,2_TssAFlnk;E007,1_TssA;E008,1_TssA;E009,1_TssA;E010,1_TssA;E011,1_TssA;E012,1_TssA;E013,1_TssA;E014,1_TssA;E015,1_TssA;E016,1_TssA;E017,2_TssAFlnk;E018,1_TssA;E019,1_TssA;E020,1_TssA;E021,1_TssA;E022,2_TssAFlnk;E023,2_TssAFlnk;E024,1_TssA;E025,1_TssA;E026,1_TssA;E027,2_TssAFlnk;E028,1_TssA;E029,2_TssAFlnk;E030,2_TssAFlnk;E031,2_…	E083,1_TssA;E095,1_TssA;E104,1_TssA;E105,1_TssA	E003;E006;E007;E029;E032;E033;E034;E050;E055;E056;E057;E059;E082;E083;E086;E088;E089;E091;E092;E097;E100;E118;E119;E121;E124;E126;E127;E128	E083
120	previously not reported	RBPMS2	15:65035979:A:G	rs3935716	15	65035979	A	G	15:64697614:A:G	rs7169480	15	64697614	A	G	0.870496	E017,6_EnhG;E029,6_EnhG;E036,6_EnhG;E114,6_EnhG;E117,6_EnhG;E118,7_Enh
120	previously not reported	RBPMS2	15:65035979:A:G	rs8027197	15	65035979	A	G	15:64700558:C:G		15	64700558	C	G	0.87546			E003;E021;E022;E091
120	previously not reported	RBPMS2	15:65035979:A:G	rs3935716	15	65035979	A	G	15:64701369:A:G	rs7183632	15	64701369	G	A	0.874896	E080,6_EnhG;E123,6_EnhG
120	previously not reported	RBPMS2	15:65035979:A:G	rs141667851	15	65035979	A	G	15:64704844:D:I		15	64704844	D	I	0.850413			E127
120	previously not reported	RBPMS2	15:65035979:A:G	rs3935716	15	65035979	A	G	15:64731679:A:G	rs2101225	15	64731679	G	A	0.884259	E033,7_Enh;E035,7_Enh;E036,7_Enh;E050,7_Enh;E051,7_Enh		E050;E051
120	previously not reported	RBPMS2	15:65035979:A:G	rs3935716	15	65035979	A	G	15:64735527:A:G	rs936689	15	64735527	G	A	0.888648	E017,7_Enh;E025,7_Enh;E026,7_Enh;E027,7_Enh;E028,7_Enh;E033,7_Enh;E036,7_Enh;E037,7_Enh;E038,7_Enh;E039,7_Enh;E040,7_Enh;E041,7_Enh;E042,7_Enh;E043,7_Enh;E048,7_Enh;E050,7_Enh;E051,7_Enh;E052,7_Enh;E055,7_Enh;E057,7_Enh;E058,7_Enh;E076,7_Enh;E077,7_Enh;E078,7_Enh;E084,7_Enh;E099,7_Enh;E109,7_Enh;E110,7_Enh;E114,7_Enh;E116,2_TssAFlnk;E117,7_Enh;E119,7_Enh;E121,7_Enh;E122,7_Enh;E123,7_Enh;E125,7_En…		E084;E121;E125;E128
120	previously not reported	RBPMS2	15:65035979:A:G	rs10685830	15	65035979	A	G	15:64736206:D:I		15	64736206	D	I	0.887929			E005;E028;E057;E109;E116;E117;E122;E123
120	previously not reported	RBPMS2	15:65035979:A:G	rs3935716	15	65035979	A	G	15:64736287:C:T	rs7162324	15	64736287	T	C	0.887929	E013,7_Enh;E017,7_Enh;E023,7_Enh;E025,7_Enh;E026,2_TssAFlnk;E027,7_Enh;E028,7_Enh;E033,7_Enh;E035,7_Enh;E036,7_Enh;E037,7_Enh;E038,7_Enh;E039,7_Enh;E040,7_Enh;E041,7_Enh;E042,7_Enh;E043,7_Enh;E045,7_Enh;E047,7_Enh;E048,7_Enh;E049,7_Enh;E050,7_Enh;E051,7_Enh;E052,7_Enh;E055,7_Enh;E057,7_Enh;E076,7_Enh;E077,7_Enh;E078,7_Enh;E085,7_Enh;E103,7_Enh;E110,7_Enh;E114,2_TssAFlnk;E116,2_TssAFlnk;E117,2_Tss…		E005;E028;E034;E056;E057;E114;E116;E117;E119;E120;E121;E122;E123;E125;E128
120	previously not reported	RBPMS2	15:65035979:A:G	rs3935716	15	65035979	A	G	15:64739630:A:C	rs12916779	15	64739630	C	A	0.897564	E036,7_Enh;E037,7_Enh;E038,6_EnhG;E040,7_Enh;E048,7_Enh;E050,7_Enh;E051,7_Enh;E066,6_EnhG;E116,7_Enh		E116
120	previously not reported	RBPMS2	15:65035979:A:G	rs3935716	15	65035979	A	G	15:64751162:A:G	rs4442756	15	64751162	A	G	0.889664	E036,7_Enh;E039,7_Enh;E049,7_Enh;E050,7_Enh;E051,7_Enh;E080,7_Enh;E123,7_Enh		E057;E086
120	previously not reported	RBPMS2	15:65035979:A:G	rs3935716	15	65035979	A	G	15:64755580:A:G	rs12101509	15	64755580	A	G	0.888967	E003,7_Enh;E010,7_Enh;E011,1_TssA;E012,7_Enh;E016,7_Enh;E017,7_Enh;E024,7_Enh;E027,7_Enh;E029,7_Enh;E032,7_Enh;E033,7_Enh;E034,7_Enh;E035,7_Enh;E036,7_Enh;E037,7_Enh;E038,7_Enh;E039,7_Enh;E040,7_Enh;E041,7_Enh;E042,7_Enh;E043,7_Enh;E044,7_Enh;E046,7_Enh;E047,7_Enh;E048,7_Enh;E049,7_Enh;E050,7_Enh;E051,7_Enh;E053,7_Enh;E054,7_Enh;E059,7_Enh;E061,7_Enh;E066,7_Enh;E067,7_Enh;E069,7_Enh;E070,1_TssA;E…	E095,7_Enh;E104,7_Enh	E116
120	previously not reported	RBPMS2	15:65035979:A:G	rs3935716	15	65035979	A	G	15:64756886:D:I	rs11428331	15	64756886	D	I	0.816407	E001,7_Enh;E010,7_Enh;E012,7_Enh;E014,7_Enh;E016,7_Enh;E017,7_Enh;E018,7_Enh;E019,7_Enh;E020,7_Enh;E023,7_Enh;E025,7_Enh;E026,7_Enh;E027,7_Enh;E028,6_EnhG;E029,7_Enh;E031,7_Enh;E032,7_Enh;E033,7_Enh;E034,7_Enh;E035,7_Enh;E036,6_EnhG;E037,7_Enh;E038,7_Enh;E039,7_Enh;E040,7_Enh;E041,2_TssAFlnk;E042,7_Enh;E043,7_Enh;E044,7_Enh;E045,7_Enh;E046,7_Enh;E047,7_Enh;E048,7_Enh;E049,7_Enh;E050,7_Enh;E051,2_…	E083,7_Enh;E095,7_Enh;E104,7_Enh;E105,7_Enh	E088;E116
120	previously not reported	RBPMS2	15:65035979:A:G	rs3935716	15	65035979	A	G	15:64770652:C:T	rs2470895	15	64770652	C	T	0.892947	E017,7_Enh;E023,7_Enh;E029,7_Enh;E039,7_Enh;E041,7_Enh;E043,7_Enh;E049,7_Enh;E050,7_Enh;E066,7_Enh;E124,7_Enh
120	previously not reported	RBPMS2	15:65035979:A:G	rs3935716	15	65035979	A	G	15:64775834:A:C	rs574205	15	64775834	C	A	0.892997	E006,6_EnhG;E066,7_Enh;E084,7_Enh;E085,6_EnhG;E086,7_Enh;E094,7_Enh;E098,7_Enh;E114,6_EnhG;E118,7_Enh
120	previously not reported	RBPMS2	15:65035979:A:G	rs3935716	15	65035979	A	G	15:64776614:C:T	rs594815	15	64776614	C	T	0.892997	E066,7_Enh;E098,7_Enh
120	previously not reported	RBPMS2	15:65035979:A:G	rs3935716	15	65035979	A	G	15:64783725:A:G	rs477966	15	64783725	A	G	0.892997	E038,7_Enh;E039,7_Enh;E041,7_Enh;E043,7_Enh;E047,7_Enh;E048,7_Enh;E071,7_Enh
120	previously not reported	RBPMS2	15:65035979:A:G	rs3935716	15	65035979	A	G	15:64793617:A:G	rs576926	15	64793617	A	G	0.894356	E013,6_EnhG;E017,6_EnhG;E027,6_EnhG;E028,6_EnhG;E029,6_EnhG;E033,7_Enh;E034,6_EnhG;E036,6_EnhG;E037,7_Enh;E038,7_Enh;E039,7_Enh;E040,7_Enh;E041,7_Enh;E042,6_EnhG;E043,7_Enh;E044,6_EnhG;E045,7_Enh;E047,7_Enh;E048,7_Enh;E050,6_EnhG;E051,7_Enh;E053,7_Enh;E054,6_EnhG;E055,6_EnhG;E056,6_EnhG;E062,6_EnhG;E063,6_EnhG;E067,7_Enh;E068,6_EnhG;E069,6_EnhG;E070,7_Enh;E071,7_Enh;E072,7_Enh;E073,7_Enh;E074,7_E…	E104,7_Enh	E055;E056;E081;E083;E090;E093;E109	E083
120	previously not reported	RBPMS2	15:65035979:A:G	rs3935716	15	65035979	A	G	15:64798745:C:T	rs61477175	15	64798745	C	T	0.885396	E006,6_EnhG;E033,7_Enh;E034,7_Enh;E038,7_Enh;E039,7_Enh;E041,7_Enh
120	previously not reported	RBPMS2	15:65035979:A:G	rs3935716	15	65035979	A	G	15:64801068:D:I	rs35976269	15	64801068	D	I	0.891724	E032,7_Enh;E033,7_Enh;E037,7_Enh;E039,7_Enh;E043,7_Enh;E047,7_Enh;E050,7_Enh;E051,7_Enh;E069,7_Enh;E077,7_Enh;E080,7_Enh;E084,7_Enh;E093,7_Enh;E097,7_Enh;E116,7_Enh		E007
120	previously not reported	RBPMS2	15:65035979:A:G	rs3935716	15	65035979	A	G	15:64802691:C:G	rs650399	15	64802691	C	G	0.901179	E006,6_EnhG;E033,7_Enh;E037,7_Enh;E038,7_Enh;E039,7_Enh;E041,7_Enh;E043,7_Enh;E047,7_Enh;E048,7_Enh;E071,7_Enh;E095,7_Enh;E097,7_Enh	E095,7_Enh	E021
120	previously not reported	RBPMS2	15:65035979:A:G	rs3935716	15	65035979	A	G	15:64803250:C:T	rs486330	15	64803250	C	T	0.892281	E033,7_Enh;E037,7_Enh;E038,7_Enh;E039,7_Enh;E041,7_Enh;E043,7_Enh;E047,7_Enh;E048,7_Enh
120	previously not reported	RBPMS2	15:65035979:A:G	rs3935716	15	65035979	A	G	15:64804862:A:T	rs620171	15	64804862	T	A	0.861433	E033,7_Enh;E038,7_Enh;E039,7_Enh;E041,7_Enh;E043,7_Enh;E047,7_Enh;E048,7_Enh;E051,7_Enh;E067,7_Enh;E068,7_Enh
120	previously not reported	RBPMS2	15:65035979:A:G	rs3935716	15	65035979	A	G	15:64814727:C:G	rs556972	15	64814727	C	G	0.893049	E009,7_Enh;E010,7_Enh;E011,2_TssAFlnk;E013,7_Enh;E014,7_Enh;E016,7_Enh;E018,7_Enh;E020,7_Enh;E023,7_Enh;E025,7_Enh;E026,7_Enh;E027,7_Enh;E028,7_Enh;E033,7_Enh;E037,7_Enh;E038,7_Enh;E039,7_Enh;E041,7_Enh;E043,7_Enh;E047,7_Enh;E048,7_Enh;E049,7_Enh;E050,7_Enh;E051,7_Enh;E052,7_Enh;E053,7_Enh;E057,7_Enh;E061,7_Enh;E067,7_Enh;E068,7_Enh;E069,7_Enh;E071,7_Enh;E072,7_Enh;E074,7_Enh;E076,7_Enh;E078,7_En…	E083,7_Enh	E028;E088;E090;E117;E119;E128
120	previously not reported	RBPMS2	15:65035979:A:G	rs3935716	15	65035979	A	G	15:64829234:C:T	rs7170579	15	64829234	C	T	0.890344	E017,7_Enh;E050,7_Enh;E055,7_Enh;E058,7_Enh;E110,7_Enh;E122,7_Enh
120	previously not reported	RBPMS2	15:65035979:A:G	rs3935716	15	65035979	A	G	15:64829781:A:G	rs8036485	15	64829781	G	A	0.812766	E017,7_Enh;E050,7_Enh;E110,7_Enh;E122,7_Enh		E050
120	previously not reported	RBPMS2	15:65035979:A:G	rs3935716	15	65035979	A	G	15:64837514:C:T	rs483355	15	64837514	C	T	0.887047	E043,7_Enh;E047,7_Enh;E051,6_EnhG;E080,7_Enh;E097,6_EnhG;E098,7_Enh;E105,7_Enh	E105,7_Enh	E080;E083;E118	E083
120	previously not reported	RBPMS2	15:65035979:A:G	rs3935716	15	65035979	A	G	15:64843760:A:G	rs6494480	15	64843760	G	A	0.814901	E043,7_Enh;E050,7_Enh
120	previously not reported	RBPMS2	15:65035979:A:G	rs3935716	15	65035979	A	G	15:64844372:G:T	rs8036775	15	64844372	G	T	0.814901	E039,7_Enh;E043,7_Enh;E050,7_Enh		E080
120	previously not reported	RBPMS2	15:65035979:A:G	rs3935716	15	65035979	A	G	15:64849904:G:T	rs6494481	15	64849904	G	T	0.813616	E122,7_Enh
120	previously not reported	RBPMS2	15:65035979:A:G	rs3935716	15	65035979	A	G	15:64850939:D:I	rs498806	15	64850939	D	I	0.889396	E011,7_Enh;E013,7_Enh;E017,7_Enh;E023,7_Enh;E025,7_Enh;E026,7_Enh;E033,7_Enh;E037,7_Enh;E039,7_Enh;E040,7_Enh;E041,7_Enh;E043,7_Enh;E047,7_Enh;E048,7_Enh;E049,7_Enh;E050,7_Enh;E051,7_Enh;E052,7_Enh;E061,7_Enh;E063,7_Enh;E066,7_Enh;E067,7_Enh;E077,7_Enh;E078,7_Enh;E080,7_Enh;E084,7_Enh;E085,7_Enh;E101,7_Enh;E102,7_Enh;E107,7_Enh;E110,7_Enh;E114,7_Enh;E116,7_Enh;E118,7_Enh;E120,7_Enh;E121,7_Enh;E12…		E084;E085;E109;E114;E122
120	previously not reported	RBPMS2	15:65035979:A:G	rs3935716	15	65035979	A	G	15:64851132:C:T	rs500641	15	64851132	C	T	0.891071	E011,7_Enh;E013,7_Enh;E017,7_Enh;E020,7_Enh;E023,7_Enh;E024,7_Enh;E025,7_Enh;E026,7_Enh;E033,7_Enh;E037,7_Enh;E039,7_Enh;E040,7_Enh;E041,7_Enh;E043,7_Enh;E048,7_Enh;E049,7_Enh;E050,7_Enh;E051,7_Enh;E061,7_Enh;E063,7_Enh;E066,7_Enh;E067,7_Enh;E077,7_Enh;E078,7_Enh;E080,7_Enh;E084,7_Enh;E085,7_Enh;E101,7_Enh;E102,7_Enh;E107,7_Enh;E110,7_Enh;E114,7_Enh;E116,7_Enh;E118,7_Enh;E120,7_Enh;E121,7_Enh;E12…		E017;E080;E084;E085;E109;E116;E120;E121;E122;E123;E128
120	previously not reported	RBPMS2	15:65035979:A:G	rs3935716	15	65035979	A	G	15:64853654:D:I	rs3985666	15	64853654	I	A	0.817414	E037,7_Enh;E039,7_Enh;E041,7_Enh;E043,7_Enh;E051,7_Enh;E080,7_Enh;E081,7_Enh;E082,7_Enh;E084,7_Enh;E085,7_Enh;E097,7_Enh;E123,7_Enh		E123
120	previously not reported	RBPMS2	15:65035979:A:G	rs3935716	15	65035979	A	G	15:64854511:A:G	rs686634	15	64854511	A	G	0.896225	E033,6_EnhG;E039,7_Enh;E041,7_Enh;E050,7_Enh;E051,7_Enh;E069,7_Enh;E070,7_Enh;E071,7_Enh;E074,7_Enh;E080,7_Enh;E081,7_Enh;E085,7_Enh;E102,7_Enh;E123,6_EnhG		E033;E080;E123
120	previously not reported	RBPMS2	15:65035979:A:G	rs3935716	15	65035979	A	G	15:64856394:C:T	rs2733382	15	64856394	C	T	0.892322	E001,7_Enh;E002,7_Enh;E024,7_Enh;E115,7_Enh;E116,7_Enh;E123,6_EnhG		E004;E008;E022;E123
120	previously not reported	RBPMS2	15:65035979:A:G	rs3935716	15	65035979	A	G	15:64857043:C:T	rs2733381	15	64857043	T	C	0.892392	E032,7_Enh;E116,7_Enh
120	previously not reported	RBPMS2	15:65035979:A:G	rs3935716	15	65035979	A	G	15:64858492:A:G	rs637748	15	64858492	A	G	0.891733	E005,7_Enh;E006,6_EnhG;E012,7_Enh;E015,7_Enh;E017,6_EnhG;E018,7_Enh;E021,7_Enh;E022,7_Enh;E024,7_Enh;E029,7_Enh;E032,7_Enh;E034,7_Enh;E039,7_Enh;E041,7_Enh;E050,7_Enh;E051,7_Enh;E063,7_Enh;E071,7_Enh;E079,7_Enh;E083,7_Enh;E084,7_Enh;E085,6_EnhG;E095,7_Enh;E097,7_Enh;E100,7_Enh;E101,7_Enh;E104,7_Enh;E106,7_Enh;E107,7_Enh;E109,7_Enh;E110,7_Enh;E113,7_Enh;E114,7_Enh;E116,6_EnhG;E117,7_Enh;E123,3_TxF…	E083,7_Enh;E095,7_Enh;E104,7_Enh	E021;E091;E123
120	previously not reported	RBPMS2	15:65035979:A:G	rs3935716	15	65035979	A	G	15:64862638:A:T	rs561055	15	64862638	A	T	0.893649	E039,7_Enh;E041,7_Enh;E043,7_Enh;E048,7_Enh;E050,7_Enh;E051,7_Enh		E034
120	previously not reported	RBPMS2	15:65035979:A:G	rs3935716	15	65035979	A	G	15:64862910:G:T	rs563766	15	64862910	G	T	0.892985	E032,7_Enh;E039,7_Enh;E050,7_Enh;E051,7_Enh
120	previously not reported	RBPMS2	15:65035979:A:G	rs3935716	15	65035979	A	G	15:64877707:G:T	rs567065	15	64877707	T	G	0.912135	E006,7_Enh;E017,7_Enh;E025,7_Enh;E027,7_Enh;E028,7_Enh;E033,7_Enh;E034,7_Enh;E037,7_Enh;E038,7_Enh;E039,7_Enh;E041,7_Enh;E043,7_Enh;E047,7_Enh;E048,7_Enh;E049,7_Enh;E050,7_Enh;E051,7_Enh;E052,7_Enh;E055,7_Enh;E063,7_Enh;E067,7_Enh;E087,7_Enh;E102,7_Enh;E114,7_Enh;E126,7_Enh;E129,7_Enh		E121
120	previously not reported	RBPMS2	15:65035979:A:G	rs3935716	15	65035979	A	G	15:64884386:C:T	rs2733384	15	64884386	T	C	0.893537	E080,7_Enh
120	previously not reported	RBPMS2	15:65035979:A:G	rs3935716	15	65035979	A	G	15:64886743:C:G	rs693645	15	64886743	C	G	0.886128	E037,7_Enh;E039,7_Enh;E048,7_Enh
120	previously not reported	RBPMS2	15:65035979:A:G	rs3935716	15	65035979	A	G	15:64886748:C:G	rs2044560	15	64886748	C	G	0.886718	E037,7_Enh;E039,7_Enh;E048,7_Enh
120	previously not reported	RBPMS2	15:65035979:A:G	rs3935716	15	65035979	A	G	15:64886749:C:G	rs28375144	15	64886749	C	G	0.887436	E037,7_Enh;E039,7_Enh;E048,7_Enh
120	previously not reported	RBPMS2	15:65035979:A:G	rs3935716	15	65035979	A	G	15:64886757:A:T	rs634866	15	64886757	T	A	0.887436	E037,7_Enh;E039,7_Enh;E048,7_Enh
120	previously not reported	RBPMS2	15:65035979:A:G	rs3935716	15	65035979	A	G	15:64888243:A:C	rs520694	15	64888243	A	C	0.894252	E001,7_Enh;E033,7_Enh;E034,7_Enh;E037,7_Enh;E039,7_Enh;E041,7_Enh;E043,7_Enh;E044,7_Enh;E047,7_Enh;E050,7_Enh;E057,7_Enh
120	previously not reported	RBPMS2	15:65035979:A:G	rs3935716	15	65035979	A	G	15:64889129:C:T	rs685068	15	64889129	C	T	0.893537	E001,7_Enh;E003,7_Enh;E009,7_Enh;E010,7_Enh;E011,7_Enh;E012,7_Enh;E014,7_Enh;E016,7_Enh;E018,7_Enh;E019,7_Enh;E020,7_Enh;E023,7_Enh;E024,7_Enh;E025,2_TssAFlnk;E027,7_Enh;E029,7_Enh;E032,7_Enh;E033,2_TssAFlnk;E034,1_TssA;E035,2_TssAFlnk;E036,7_Enh;E037,2_TssAFlnk;E038,2_TssAFlnk;E039,2_TssAFlnk;E040,2_TssAFlnk;E041,2_TssAFlnk;E042,1_TssA;E043,2_TssAFlnk;E044,2_TssAFlnk;E045,1_TssA;E046,2_TssAFlnk;…	E083,7_Enh;E095,7_Enh;E104,7_Enh;E105,7_Enh	E006;E007;E032;E033;E034;E046;E050;E051;E080;E084;E085;E088;E097;E109;E116;E122
120	previously not reported	RBPMS2	15:65035979:A:G	rs3935716	15	65035979	A	G	15:64892133:C:T	rs588379	15	64892133	C	T	0.891504	E001,7_Enh;E013,7_Enh;E016,7_Enh;E017,7_Enh;E023,7_Enh;E024,7_Enh;E025,7_Enh;E026,7_Enh;E027,7_Enh;E028,7_Enh;E029,7_Enh;E033,7_Enh;E034,7_Enh;E037,7_Enh;E038,7_Enh;E039,7_Enh;E040,7_Enh;E041,7_Enh;E042,7_Enh;E043,7_Enh;E045,7_Enh;E047,7_Enh;E048,7_Enh;E049,7_Enh;E050,7_Enh;E051,7_Enh;E053,7_Enh;E054,7_Enh;E055,7_Enh;E057,7_Enh;E058,7_Enh;E059,7_Enh;E061,7_Enh;E070,7_Enh;E071,7_Enh;E072,7_Enh;E07…		E006;E017;E028;E055;E056;E057;E059;E091;E094;E114;E116;E117;E119;E122;E125;E126;E127;E128
120	previously not reported	RBPMS2	15:65035979:A:G	rs3935716	15	65035979	A	G	15:64892237:C:T	rs1665897	15	64892237	C	T	0.89217	E001,7_Enh;E005,7_Enh;E006,7_Enh;E017,7_Enh;E023,7_Enh;E024,7_Enh;E025,7_Enh;E026,7_Enh;E027,7_Enh;E028,7_Enh;E029,7_Enh;E033,7_Enh;E034,7_Enh;E037,7_Enh;E038,7_Enh;E039,7_Enh;E040,7_Enh;E041,7_Enh;E042,7_Enh;E043,7_Enh;E045,7_Enh;E046,7_Enh;E047,7_Enh;E048,7_Enh;E049,7_Enh;E050,7_Enh;E051,7_Enh;E053,7_Enh;E054,7_Enh;E057,7_Enh;E058,7_Enh;E059,7_Enh;E061,7_Enh;E070,7_Enh;E071,7_Enh;E081,7_Enh;E09…		E028;E034;E057;E059;E116;E119;E125;E128
120	previously not reported	RBPMS2	15:65035979:A:G	rs3935716	15	65035979	A	G	15:64895319:G:T	rs633275	15	64895319	T	G	0.893587	E001,7_Enh;E002,7_Enh;E026,7_Enh;E033,7_Enh;E034,7_Enh;E035,7_Enh;E036,7_Enh;E037,7_Enh;E038,7_Enh;E039,7_Enh;E041,7_Enh;E043,7_Enh;E045,7_Enh;E047,7_Enh;E048,7_Enh;E050,7_Enh;E051,7_Enh;E057,7_Enh;E058,7_Enh;E061,7_Enh;E127,7_Enh		E021;E034;E080;E123
120	previously not reported	RBPMS2	15:65035979:A:G	rs3935716	15	65035979	A	G	15:64895746:G:T	rs525039	15	64895746	G	T	0.893587	E033,7_Enh;E034,7_Enh;E035,7_Enh;E036,7_Enh;E038,7_Enh;E039,7_Enh;E041,7_Enh;E043,7_Enh;E045,7_Enh;E047,7_Enh;E048,7_Enh;E050,7_Enh;E051,7_Enh
120	previously not reported	RBPMS2	15:65035979:A:G	rs3935716	15	65035979	A	G	15:64907290:A:G	rs589190	15	64907290	A	G	0.892934	E034,7_Enh;E038,7_Enh;E039,7_Enh;E041,7_Enh;E043,7_Enh
120	previously not reported	RBPMS2	15:65035979:A:G	rs3935716	15	65035979	A	G	15:64907406:C:T	rs589690	15	64907406	C	T	0.893587	E033,7_Enh;E034,7_Enh;E038,7_Enh;E039,7_Enh;E040,7_Enh;E041,7_Enh;E042,7_Enh;E043,7_Enh;E045,7_Enh;E047,7_Enh;E048,7_Enh;E051,7_Enh;E093,7_Enh		E017;E123
120	previously not reported	RBPMS2	15:65035979:A:G	rs3935716	15	65035979	A	G	15:64908871:A:G	rs8043506	15	64908871	A	G	0.893587	E034,7_Enh;E037,7_Enh;E038,7_Enh;E039,7_Enh;E041,7_Enh;E043,7_Enh;E048,7_Enh
120	previously not reported	RBPMS2	15:65035979:A:G	rs3935716	15	65035979	A	G	15:64909301:C:G	rs8024055	15	64909301	C	G	0.88654	E034,7_Enh;E037,7_Enh;E038,7_Enh;E039,7_Enh;E041,7_Enh;E043,7_Enh;E048,7_Enh
120	previously not reported	RBPMS2	15:65035979:A:G	rs3935716	15	65035979	A	G	15:64910003:A:G	rs2593698	15	64910003	A	G	0.88654	E003,7_Enh;E008,7_Enh;E014,7_Enh;E018,7_Enh;E019,7_Enh;E033,7_Enh;E034,7_Enh;E037,7_Enh;E038,7_Enh;E039,7_Enh;E041,7_Enh;E043,7_Enh;E048,7_Enh;E074,7_Enh
120	previously not reported	RBPMS2	15:65035979:A:G	rs3935716	15	65035979	A	G	15:64910945:G:T	rs571441	15	64910945	G	T	0.892871	E001,7_Enh;E003,7_Enh;E005,7_Enh;E014,12_EnhBiv;E015,7_Enh;E016,7_Enh;E017,7_Enh;E018,7_Enh;E021,7_Enh;E022,7_Enh;E024,7_Enh;E027,7_Enh;E033,7_Enh;E034,7_Enh;E035,7_Enh;E036,7_Enh;E037,7_Enh;E038,7_Enh;E039,7_Enh;E040,7_Enh;E041,7_Enh;E043,7_Enh;E046,7_Enh;E047,7_Enh;E048,7_Enh;E050,7_Enh;E051,7_Enh;E058,7_Enh;E067,7_Enh;E068,7_Enh;E069,7_Enh;E070,7_Enh;E071,7_Enh;E073,7_Enh;E074,7_Enh;E076,7_Enh…	E095,7_Enh;E105,7_Enh	E003;E051;E055;E056;E080;E081;E083;E088;E126	E083
120	previously not reported	RBPMS2	15:65035979:A:G	rs3935716	15	65035979	A	G	15:64917035:G:T	rs575996	15	64917035	T	G	0.910157	E027,6_EnhG;E033,7_Enh;E034,7_Enh;E035,7_Enh;E037,7_Enh;E038,7_Enh;E039,7_Enh;E040,7_Enh;E041,7_Enh;E042,7_Enh;E043,7_Enh;E044,7_Enh;E045,7_Enh;E046,7_Enh;E047,7_Enh;E048,7_Enh;E050,7_Enh;E051,7_Enh;E073,7_Enh;E081,7_Enh;E093,6_EnhG;E098,7_Enh;E100,7_Enh;E112,7_Enh;E116,7_Enh
120	previously not reported	RBPMS2	15:65035979:A:G	rs3935716	15	65035979	A	G	15:64928651:C:G	rs680910	15	64928651	C	G	0.88426	E009,7_Enh;E010,7_Enh;E011,7_Enh;E012,7_Enh;E016,7_Enh;E017,7_Enh;E018,7_Enh;E019,7_Enh;E020,7_Enh;E023,7_Enh;E024,7_Enh;E025,7_Enh;E027,7_Enh;E037,7_Enh;E038,7_Enh;E039,7_Enh;E040,7_Enh;E041,7_Enh;E047,7_Enh;E048,7_Enh;E050,7_Enh;E051,7_Enh;E053,7_Enh;E054,7_Enh;E058,7_Enh;E066,7_Enh;E067,7_Enh;E068,7_Enh;E069,7_Enh;E070,2_TssAFlnk;E071,7_Enh;E072,7_Enh;E073,7_Enh;E074,7_Enh;E076,7_Enh;E077,2_Ts…	E083,7_Enh	E007;E085;E088;E090
120	previously not reported	RBPMS2	15:65035979:A:G	rs3935716	15	65035979	A	G	15:64930248:A:G	rs636553	15	64930248	G	A	0.853798	E084,7_Enh
120	previously not reported	RBPMS2	15:65035979:A:G	rs3935716	15	65035979	A	G	15:64933982:G:T	rs4777499	15	64933982	G	T	0.866212	E029,7_Enh;E030,7_Enh;E037,7_Enh;E039,7_Enh;E040,7_Enh;E041,7_Enh;E046,7_Enh;E084,7_Enh;E085,7_Enh;E110,7_Enh;E118,7_Enh;E124,7_Enh
120	previously not reported	RBPMS2	15:65035979:A:G	rs3935716	15	65035979	A	G	15:64936786:C:G	rs2414852	15	64936786	G	C	0.866413	E038,7_Enh;E039,7_Enh;E040,7_Enh;E041,7_Enh;E045,7_Enh;E047,7_Enh;E048,7_Enh;E084,7_Enh;E085,7_Enh;E102,7_Enh;E118,7_Enh
120	previously not reported	RBPMS2	15:65035979:A:G	rs10851736	15	65035979	A	G	15:64940718:C:T		15	64940718	T	C	0.866389			E092;E114;E116
120	previously not reported	RBPMS2	15:65035979:A:G	rs3935716	15	65035979	A	G	15:64940891:A:G	rs8037182	15	64940891	G	A	0.865142	E033,7_Enh;E037,7_Enh;E039,7_Enh;E116,7_Enh
120	previously not reported	RBPMS2	15:65035979:A:G	rs3935716	15	65035979	A	G	15:64965815:G:T	rs11071803	15	64965815	T	G	0.912819	E080,6_EnhG		E123;E127
120	previously not reported	RBPMS2	15:65035979:A:G	rs3935716	15	65035979	A	G	15:64975763:C:G	rs11071804	15	64975763	C	G	0.916117	E054,6_EnhG;E055,6_EnhG;E063,6_EnhG;E070,6_EnhG;E083,7_Enh;E095,7_Enh;E104,7_Enh;E113,6_EnhG	E083,7_Enh;E095,7_Enh;E104,7_Enh	E055;E091;E120;E126;E128
120	previously not reported	RBPMS2	15:65035979:A:G	rs3935716	15	65035979	A	G	15:64978552:D:I	rs142778808	15	64978552	I	A	0.922711	E003,6_EnhG;E019,6_EnhG;E020,6_EnhG;E089,6_EnhG;E092,6_EnhG;E097,7_Enh		E003;E004;E006;E007;E008;E017;E021;E022;E028;E029;E032;E033;E034;E046;E050;E051;E055;E056;E057;E059;E080;E081;E082;E083;E086;E088;E089;E090;E091;E092;E093;E094;E097;E098;E100;E109;E114;E116;E117;E118;E119;E120;E121;E122;E123;E124;E125;E126;E127	E083
120	previously not reported	RBPMS2	15:65035979:A:G	rs3935716	15	65035979	A	G	15:64979291:C:G	rs7403751	15	64979291	G	C	0.820907	E003,6_EnhG;E011,6_EnhG;E019,6_EnhG;E020,6_EnhG;E053,6_EnhG;E063,6_EnhG;E068,6_EnhG;E071,6_EnhG;E073,6_EnhG;E074,7_Enh;E078,6_EnhG;E088,6_EnhG;E090,6_EnhG;E097,7_Enh;E107,6_EnhG;E108,6_EnhG;E111,6_EnhG		E004;E008;E021;E032;E090;E097;E124
120	previously not reported	RBPMS2	15:65035979:A:G	rs3935716	15	65035979	A	G	15:64995737:C:T	rs8038016	15	64995737	C	T	0.913645	E001,1_TssA;E002,1_TssA;E003,2_TssAFlnk;E004,1_TssA;E005,2_TssAFlnk;E006,1_TssA;E007,1_TssA;E008,3_TxFlnk;E009,1_TssA;E010,1_TssA;E011,1_TssA;E012,1_TssA;E013,2_TssAFlnk;E014,2_TssAFlnk;E015,2_TssAFlnk;E016,2_TssAFlnk;E017,1_TssA;E018,2_TssAFlnk;E019,2_TssAFlnk;E020,1_TssA;E021,1_TssA;E022,1_TssA;E023,1_TssA;E024,2_TssAFlnk;E025,1_TssA;E026,1_TssA;E027,1_TssA;E028,2_TssAFlnk;E029,2_TssAFlnk;E030,…	E083,1_TssA;E095,1_TssA;E104,1_TssA;E105,2_TssAFlnk	E003;E004;E006;E007;E008;E017;E021;E022;E028;E029;E032;E033;E034;E046;E051;E055;E056;E057;E059;E080;E081;E082;E083;E084;E085;E086;E088;E089;E090;E091;E092;E093;E097;E098;E100;E109;E114;E116;E117;E118;E119;E120;E121;E122;E123;E124;E125;E126;E128	E083
120	previously not reported	RBPMS2	15:65035979:A:G	rs11635211	15	65035979	A	G	15:65016298:A:C		15	65016298	A	C	0.924609			E046
120	previously not reported	RBPMS2	15:65035979:A:G	rs3935716	15	65035979	A	G	15:65034268:D:I	rs57758351	15	65034268	I	C	0.831168	E022,6_EnhG;E076,7_Enh;E095,6_EnhG;E103,7_Enh;E105,6_EnhG;E111,6_EnhG	E095,6_EnhG;E105,6_EnhG
120	previously not reported	RBPMS2	15:65035979:A:G	rs3935716	15	65035979	A	G	15:65035979:A:G	rs3935716	15	65035979	A	G	1	E022,6_EnhG;E076,7_Enh;E078,7_Enh;E089,7_Enh;E090,7_Enh;E095,6_EnhG;E105,6_EnhG;E111,6_EnhG	E095,6_EnhG;E105,6_EnhG	E083	E083
120	previously not reported	RBPMS2	15:65035979:A:G	rs3935716	15	65035979	A	G	15:65039719:C:T	rs4474637	15	65039719	C	T	0.939818	E006,7_Enh;E022,6_EnhG;E027,7_Enh;E035,7_Enh;E036,7_Enh;E050,7_Enh;E051,7_Enh;E056,12_EnhBiv;E063,7_Enh;E076,7_Enh;E083,7_Enh;E089,7_Enh;E093,7_Enh;E095,2_TssAFlnk;E103,7_Enh;E104,2_TssAFlnk;E105,2_TssAFlnk;E107,12_EnhBiv;E108,12_EnhBiv;E111,6_EnhG;E112,7_Enh;E113,7_Enh	E083,7_Enh;E095,2_TssAFlnk;E104,2_TssAFlnk;E105,2_TssAFlnk
120	previously not reported	RBPMS2	15:65035979:A:G	rs3935716	15	65035979	A	G	15:65040445:G:T	rs11632113	15	65040445	T	G	0.979465	E022,6_EnhG;E027,7_Enh;E076,6_EnhG;E078,7_Enh;E083,7_Enh;E089,6_EnhG;E093,7_Enh;E095,3_TxFlnk;E103,7_Enh;E104,7_Enh;E105,3_TxFlnk;E107,7_Enh;E108,7_Enh;E111,6_EnhG	E083,7_Enh;E095,3_TxFlnk;E104,7_Enh;E105,3_TxFlnk
120	previously not reported	RBPMS2	15:65035979:A:G	rs3935716	15	65035979	A	G	15:65040928:C:T	rs12911708	15	65040928	C	T	0.830405	E017,7_Enh;E022,6_EnhG;E027,7_Enh;E028,12_EnhBiv;E055,12_EnhBiv;E058,12_EnhBiv;E076,6_EnhG;E078,7_Enh;E083,7_Enh;E089,6_EnhG;E092,6_EnhG;E093,7_Enh;E095,3_TxFlnk;E103,7_Enh;E104,2_TssAFlnk;E105,3_TxFlnk;E107,6_EnhG;E108,7_Enh;E111,3_TxFlnk;E121,7_Enh;E127,12_EnhBiv	E083,7_Enh;E095,3_TxFlnk;E104,2_TssAFlnk;E105,3_TxFlnk
120	previously not reported	RBPMS2	15:65035979:A:G	rs3935716	15	65035979	A	G	15:65041044:A:C	rs6494492	15	65041044	C	A	0.827687	E017,7_Enh;E022,6_EnhG;E023,12_EnhBiv;E027,7_Enh;E028,12_EnhBiv;E052,7_Enh;E055,12_EnhBiv;E058,12_EnhBiv;E076,7_Enh;E080,7_Enh;E083,2_TssAFlnk;E089,6_EnhG;E092,6_EnhG;E093,7_Enh;E095,3_TxFlnk;E099,7_Enh;E103,7_Enh;E104,1_TssA;E105,2_TssAFlnk;E107,6_EnhG;E108,7_Enh;E111,3_TxFlnk;E121,7_Enh;E127,12_EnhBiv	E083,2_TssAFlnk;E095,3_TxFlnk;E104,1_TssA;E105,2_TssAFlnk	E093
120	previously not reported	RBPMS2	15:65035979:A:G	rs3935716	15	65035979	A	G	15:65041622:A:C	rs6494493	15	65041622	C	A	0.966615	E013,7_Enh;E017,7_Enh;E022,6_EnhG;E023,12_EnhBiv;E025,7_Enh;E027,7_Enh;E052,7_Enh;E055,12_EnhBiv;E056,12_EnhBiv;E057,7_Enh;E058,12_EnhBiv;E063,7_Enh;E076,7_Enh;E080,7_Enh;E083,7_Enh;E084,7_Enh;E086,7_Enh;E092,6_EnhG;E095,1_TssA;E099,7_Enh;E103,7_Enh;E104,1_TssA;E105,1_TssA;E107,7_Enh;E108,7_Enh;E111,6_EnhG;E119,7_Enh;E120,7_Enh;E121,7_Enh;E125,7_Enh;E127,12_EnhBiv;E129,7_Enh	E083,7_Enh;E095,1_TssA;E104,1_TssA;E105,1_TssA	E006;E017;E028;E055;E056;E057;E080;E083;E089;E090;E092;E097;E100;E119;E120;E121;E125;E126;E127;E128	E083
120	previously not reported	RBPMS2	15:65035979:A:G	rs3935716	15	65035979	A	G	15:65043534:D:I	rs113044919	15	65043534	D	I	0.845542	E001,6_EnhG;E003,7_Enh;E015,6_EnhG;E022,6_EnhG;E076,7_Enh;E083,7_Enh;E095,7_Enh;E103,7_Enh;E111,2_TssAFlnk;E118,12_EnhBiv	E083,7_Enh;E095,7_Enh
120	previously not reported	RBPMS2	15:65035979:A:G	rs3935716	15	65035979	A	G	15:65044910:A:G	rs12914109	15	65044910	A	G	0.980849	E022,7_Enh;E032,7_Enh;E083,7_Enh;E103,7_Enh;E105,7_Enh;E111,7_Enh	E083,7_Enh;E105,7_Enh
120	previously not reported	RBPMS2	15:65035979:A:G	rs3935716	15	65035979	A	G	15:65045291:C:G	rs7403350	15	65045291	G	C	0.980849	E015,6_EnhG;E022,7_Enh;E032,7_Enh;E083,7_Enh;E093,7_Enh;E095,7_Enh;E103,7_Enh;E104,7_Enh;E105,7_Enh;E107,7_Enh;E111,6_EnhG;E116,7_Enh	E083,7_Enh;E095,7_Enh;E104,7_Enh;E105,7_Enh	E083	E083
120	previously not reported	RBPMS2	15:65035979:A:G	rs3935716	15	65035979	A	G	15:65048309:A:G	rs7403071	15	65048309	G	A	0.963281	E022,6_EnhG;E032,7_Enh;E083,7_Enh;E092,7_Enh;E095,7_Enh;E104,7_Enh;E105,7_Enh;E111,7_Enh	E083,7_Enh;E095,7_Enh;E104,7_Enh;E105,7_Enh	E022;E032
120	previously not reported	RBPMS2	15:65035979:A:G	rs3935716	15	65035979	A	G	15:65048912:C:T	rs7180635	15	65048912	C	T	0.964	E032,7_Enh
120	previously not reported	RBPMS2	15:65035979:A:G	rs3935716	15	65035979	A	G	15:65051190:C:T	rs1385950	15	65051190	C	T	0.9767	E001,6_EnhG;E003,7_Enh;E015,6_EnhG;E022,6_EnhG;E083,7_Enh;E095,7_Enh;E103,7_Enh;E105,7_Enh;E107,7_Enh;E111,7_Enh	E083,7_Enh;E095,7_Enh;E105,7_Enh
120	previously not reported	RBPMS2	15:65035979:A:G	rs3935716	15	65035979	A	G	15:65055182:C:G	rs4777571	15	65055182	C	G	0.971795	E003,7_Enh;E008,6_EnhG;E015,6_EnhG;E022,6_EnhG;E076,7_Enh;E078,7_Enh;E083,7_Enh;E095,7_Enh;E103,7_Enh;E104,7_Enh;E105,7_Enh;E107,7_Enh;E111,3_TxFlnk	E083,7_Enh;E095,7_Enh;E104,7_Enh;E105,7_Enh	E083	E083
120	previously not reported	RBPMS2	15:65035979:A:G	rs10851739	15	65035979	A	G	15:65056043:A:G		15	65056043	G	A	0.975261			E083	E083
120	previously not reported	RBPMS2	15:65035979:A:G	rs3935716	15	65035979	A	G	15:65058128:A:G	rs7182488	15	65058128	G	A	0.971823	E105,7_Enh	E105,7_Enh
120	previously not reported	RBPMS2	15:65035979:A:G	rs3935716	15	65035979	A	G	15:65059220:A:T	rs1976112	15	65059220	T	A	0.958417	E032,7_Enh;E095,7_Enh;E103,7_Enh;E104,7_Enh;E111,6_EnhG	E095,7_Enh;E104,7_Enh
120	previously not reported	RBPMS2	15:65035979:A:G	rs1008917	15	65035979	A	G	15:65059651:C:T		15	65059651	T	C	0.960465			E008;E021;E022;E032;E046;E091;E116;E123
120	previously not reported	RBPMS2	15:65035979:A:G	rs3935716	15	65035979	A	G	15:65060028:C:G	rs12899738	15	65060028	C	G	0.959749	E003,6_EnhG;E013,6_EnhG;E015,6_EnhG;E021,6_EnhG;E022,7_Enh;E024,7_Enh;E032,7_Enh;E046,7_Enh;E076,7_Enh;E083,7_Enh;E103,7_Enh;E111,6_EnhG;E116,7_Enh	E083,7_Enh
120	previously not reported	RBPMS2	15:65035979:A:G	rs3935716	15	65035979	A	G	15:65064585:C:T	rs4777561	15	65064585	T	C	0.947327	E001,2_TssAFlnk;E003,2_TssAFlnk;E004,7_Enh;E008,2_TssAFlnk;E014,2_TssAFlnk;E015,2_TssAFlnk;E016,2_TssAFlnk;E018,2_TssAFlnk;E019,2_TssAFlnk;E020,2_TssAFlnk;E021,2_TssAFlnk;E024,7_Enh;E063,7_Enh;E083,7_Enh;E095,7_Enh;E105,7_Enh;E111,7_Enh;E123,7_Enh	E083,7_Enh;E095,7_Enh;E105,7_Enh	E003;E004;E008;E021;E022;E083;E086;E114	E083
120	previously not reported	RBPMS2	15:65035979:A:G	rs3935716	15	65035979	A	G	15:65066017:A:G	rs4777553	15	65066017	A	G	0.949433	E001,1_TssA;E002,1_TssA;E003,2_TssAFlnk;E004,1_TssA;E005,7_Enh;E008,1_TssA;E009,2_TssAFlnk;E010,7_Enh;E011,1_TssA;E012,12_EnhBiv;E013,1_TssA;E014,2_TssAFlnk;E015,2_TssAFlnk;E016,2_TssAFlnk;E018,2_TssAFlnk;E019,2_TssAFlnk;E020,3_TxFlnk;E021,1_TssA;E022,2_TssAFlnk;E024,2_TssAFlnk;E053,7_Enh;E054,7_Enh;E063,7_Enh;E075,10_TssBiv;E076,1_TssA;E078,10_TssBiv;E083,2_TssAFlnk;E085,10_TssBiv;E091,7_Enh;E09…	E083,2_TssAFlnk;E095,1_TssA;E104,1_TssA;E105,2_TssAFlnk	E004;E022;E032;E034;E083;E090	E083
120	previously not reported	RBPMS2	15:65035979:A:G	rs3935716	15	65035979	A	G	15:65075895:A:G	rs11071810	15	65075895	G	A	0.975317	E022,7_Enh;E063,7_Enh;E066,7_Enh;E095,7_Enh	E095,7_Enh
120	previously not reported	RBPMS2	15:65035979:A:G	rs3935716	15	65035979	A	G	15:65088162:A:T	rs11629849	15	65088162	T	A	0.968394	E022,7_Enh
120	previously not reported	RBPMS2	15:65035979:A:G	rs3935716	15	65035979	A	G	15:65100154:G:T	rs4777601	15	65100154	G	T	0.935921	E001,1_TssA;E003,2_TssAFlnk;E006,7_Enh;E007,7_Enh;E008,1_TssA;E009,7_Enh;E010,7_Enh;E012,7_Enh;E014,7_Enh;E015,1_TssA;E016,1_TssA;E018,1_TssA;E019,2_TssAFlnk;E020,7_Enh;E021,7_Enh;E022,1_TssA;E024,1_TssA;E056,12_EnhBiv;E076,1_TssA;E078,1_TssA;E083,7_Enh;E089,12_EnhBiv;E092,7_Enh;E097,7_Enh;E103,7_Enh;E111,2_TssAFlnk	E083,7_Enh	E003;E004;E007;E008;E021;E022
121	previously not reported	CORO2B	15:69021265:D:I	rs11330601	15	69021265	I	T	15:69021147:C:G	rs7163396	15	69021147	G	C	0.865408	E080,7_Enh;E083,7_Enh;E095,7_Enh;E105,7_Enh	E083,7_Enh;E095,7_Enh;E105,7_Enh
121	previously not reported	CORO2B	15:69021265:D:I	rs11330601	15	69021265	I	T	15:69021194:G:T	rs7163417	15	69021194	G	T	0.997401	E080,7_Enh;E083,7_Enh;E095,7_Enh;E105,7_Enh	E083,7_Enh;E095,7_Enh;E105,7_Enh
121	previously not reported	CORO2B	15:69021265:D:I	rs11330601	15	69021265	I	T	15:69021265:D:I	rs11330601	15	69021265	I	T	1	E053,7_Enh;E080,7_Enh;E083,7_Enh;E095,7_Enh;E105,7_Enh	E083,7_Enh;E095,7_Enh;E105,7_Enh
122	previously not reported	HCN4	15:73664723:A:T	rs8039168	15	73664723	A	T	15:73661687:G:T	rs7172796	15	73661687	T	G	0.843732	E001,10_TssBiv;E002,1_TssA;E003,10_TssBiv;E004,10_TssBiv;E005,11_BivFlnk;E006,12_EnhBiv;E007,10_TssBiv;E008,1_TssA;E009,11_BivFlnk;E010,11_BivFlnk;E011,10_TssBiv;E012,11_BivFlnk;E013,1_TssA;E014,10_TssBiv;E015,10_TssBiv;E016,10_TssBiv;E018,10_TssBiv;E019,10_TssBiv;E020,10_TssBiv;E021,1_TssA;E022,11_BivFlnk;E024,11_BivFlnk;E027,12_EnhBiv;E034,12_EnhBiv;E035,12_EnhBiv;E040,12_EnhBiv;E050,12_EnhBiv;…	E083,2_TssAFlnk;E095,12_EnhBiv;E104,1_TssA;E105,11_BivFlnk	E003;E004;E007;E008;E021;E022;E082;E083	E083
122	previously not reported	HCN4	15:73664723:A:T	rs8039168	15	73664723	A	T	15:73662855:A:G	rs11630367	15	73662855	A	G	0.986279	E001,12_EnhBiv;E005,12_EnhBiv;E008,12_EnhBiv;E014,12_EnhBiv;E015,12_EnhBiv;E016,12_EnhBiv;E020,12_EnhBiv;E021,12_EnhBiv;E022,7_Enh;E024,12_EnhBiv;E080,12_EnhBiv;E083,12_EnhBiv;E095,12_EnhBiv;E105,7_Enh	E083,12_EnhBiv;E095,12_EnhBiv;E105,7_Enh	E004;E083	E083
122	previously not reported	HCN4	15:73664723:A:T	rs8039168	15	73664723	A	T	15:73663314:A:G	rs8038766	15	73663314	A	G	0.995827	E001,12_EnhBiv;E015,12_EnhBiv;E020,12_EnhBiv;E022,7_Enh;E083,7_Enh	E083,7_Enh
122	previously not reported	HCN4	15:73664723:A:T	rs8039168	15	73664723	A	T	15:73663632:A:G	rs7172808	15	73663632	A	G	0.998608	E015,12_EnhBiv;E020,12_EnhBiv;E083,7_Enh	E083,7_Enh
122	previously not reported	HCN4	15:73664723:A:T	rs8039168	15	73664723	A	T	15:73663903:A:T	rs7173389	15	73663903	A	T	0.998608	E014,12_EnhBiv;E015,12_EnhBiv;E019,12_EnhBiv;E020,12_EnhBiv;E022,7_Enh;E083,7_Enh	E083,7_Enh
122	previously not reported	HCN4	15:73664723:A:T	rs8039168	15	73664723	A	T	15:73664041:A:G	rs7174098	15	73664041	G	A	0.899587	E002,7_Enh;E003,7_Enh;E005,7_Enh;E014,12_EnhBiv;E015,12_EnhBiv;E016,12_EnhBiv;E018,12_EnhBiv;E019,12_EnhBiv;E020,12_EnhBiv;E021,7_Enh;E022,7_Enh;E024,7_Enh;E083,7_Enh	E083,7_Enh
122	previously not reported	HCN4	15:73664723:A:T	rs8039168	15	73664723	A	T	15:73664310:G:T	rs8035896	15	73664310	T	G	0.997217	E001,7_Enh;E002,7_Enh;E003,7_Enh;E005,7_Enh;E010,12_EnhBiv;E012,12_EnhBiv;E014,7_Enh;E015,7_Enh;E016,12_EnhBiv;E018,12_EnhBiv;E019,7_Enh;E020,12_EnhBiv;E021,7_Enh;E022,7_Enh;E024,7_Enh;E056,12_EnhBiv;E083,7_Enh	E083,7_Enh	E003;E004;E008;E022;E083	E083
122	previously not reported	HCN4	15:73664723:A:T	rs8039168	15	73664723	A	T	15:73664723:A:T	rs8039168	15	73664723	A	T	1	E001,7_Enh;E002,7_Enh;E003,7_Enh;E012,12_EnhBiv;E014,7_Enh;E015,7_Enh;E016,12_EnhBiv;E018,12_EnhBiv;E019,7_Enh;E020,12_EnhBiv;E024,7_Enh;E083,7_Enh	E083,7_Enh
122	previously not reported	HCN4	15:73664723:A:T	rs8039168	15	73664723	A	T	15:73664741:G:T	rs8040533	15	73664741	T	G	1	E001,7_Enh;E002,7_Enh;E003,7_Enh;E012,12_EnhBiv;E014,7_Enh;E015,7_Enh;E016,12_EnhBiv;E018,12_EnhBiv;E019,7_Enh;E020,12_EnhBiv;E024,7_Enh;E083,7_Enh	E083,7_Enh
122	previously not reported	HCN4	15:73664723:A:T	rs8039168	15	73664723	A	T	15:73665506:G:T	rs4489968	15	73665506	T	G	1	E083,7_Enh	E083,7_Enh
122	previously not reported	HCN4	15:73664723:A:T	rs8039168	15	73664723	A	T	15:73665945:D:I	rs112762162	15	73665945	D	I	0.887765	E005,7_Enh;E022,7_Enh;E083,7_Enh;E095,7_Enh	E083,7_Enh;E095,7_Enh
123	previously not reported	ALPK3	15:85372645:A:T	rs6496452	15	85372645	A	T	15:85275636:D:I	rs11372563	15	85275636	D	I	0.825983	E006,7_Enh;E023,7_Enh;E025,7_Enh;E029,7_Enh;E032,7_Enh;E034,7_Enh;E037,7_Enh;E038,7_Enh;E039,7_Enh;E041,7_Enh;E043,7_Enh;E049,7_Enh;E114,7_Enh;E116,7_Enh;E120,7_Enh;E129,7_Enh
123	previously not reported	ALPK3	15:85372645:A:T	rs6496452	15	85372645	A	T	15:85276935:C:T	rs58581703	15	85276935	C	T	0.842661	E006,7_Enh;E018,7_Enh;E024,7_Enh;E025,7_Enh;E029,7_Enh;E030,7_Enh;E031,7_Enh;E032,7_Enh;E033,7_Enh;E034,7_Enh;E037,7_Enh;E038,7_Enh;E039,7_Enh;E040,7_Enh;E041,7_Enh;E042,7_Enh;E043,7_Enh;E045,7_Enh;E047,7_Enh;E048,7_Enh;E049,7_Enh;E084,7_Enh;E085,7_Enh;E093,7_Enh;E101,7_Enh;E106,7_Enh;E112,7_Enh;E114,2_TssAFlnk;E116,7_Enh;E117,7_Enh;E118,7_Enh;E123,7_Enh;E124,7_Enh;E129,7_Enh
123	previously not reported	ALPK3	15:85372645:A:T	rs6496452	15	85372645	A	T	15:85277888:A:G	rs8028490	15	85277888	G	A	0.83191	E001,7_Enh;E003,7_Enh;E005,7_Enh;E006,7_Enh;E013,7_Enh;E015,7_Enh;E024,7_Enh;E029,7_Enh;E030,2_TssAFlnk;E031,7_Enh;E032,7_Enh;E033,7_Enh;E034,7_Enh;E035,7_Enh;E036,7_Enh;E037,7_Enh;E038,7_Enh;E039,7_Enh;E040,7_Enh;E041,7_Enh;E042,7_Enh;E043,2_TssAFlnk;E044,7_Enh;E045,7_Enh;E046,7_Enh;E047,7_Enh;E048,7_Enh;E050,7_Enh;E051,7_Enh;E057,7_Enh;E062,7_Enh;E063,7_Enh;E075,7_Enh;E077,7_Enh;E080,7_Enh;E084…		E093;E114
123	previously not reported	ALPK3	15:85372645:A:T	rs6496452	15	85372645	A	T	15:85355113:A:C	rs11073731	15	85355113	C	A	0.825151	E030,7_Enh;E063,7_Enh		E098
123	previously not reported	ALPK3	15:85372645:A:T	rs6496452	15	85372645	A	T	15:85355494:C:T	rs8037423	15	85355494	C	T	0.828673	E063,7_Enh;E092,7_Enh;E118,7_Enh		E083	E083
123	previously not reported	ALPK3	15:85372645:A:T	rs6496452	15	85372645	A	T	15:85361960:C:T	rs4633690	15	85361960	C	T	0.858097	E001,2_TssAFlnk;E003,7_Enh;E004,2_TssAFlnk;E005,7_Enh;E006,7_Enh;E007,7_Enh;E008,1_TssA;E009,7_Enh;E010,7_Enh;E011,3_TxFlnk;E012,2_TssAFlnk;E013,2_TssAFlnk;E014,2_TssAFlnk;E015,2_TssAFlnk;E016,2_TssAFlnk;E017,12_EnhBiv;E018,2_TssAFlnk;E019,2_TssAFlnk;E020,2_TssAFlnk;E021,7_Enh;E022,7_Enh;E023,7_Enh;E024,7_Enh;E025,7_Enh;E026,7_Enh;E027,7_Enh;E033,2_TssAFlnk;E036,7_Enh;E041,7_Enh;E043,7_Enh;E044,7…	E083,2_TssAFlnk;E095,2_TssAFlnk;E104,2_TssAFlnk;E105,1_TssA	E004;E005;E006;E017;E021;E022;E055;E059;E080;E083;E084;E085;E086;E088;E089;E090;E091;E092;E093;E094;E098;E100;E114;E117;E118;E120;E121;E122;E123;E126;E128	E083
123	previously not reported	ALPK3	15:85372645:A:T	rs6496452	15	85372645	A	T	15:85361977:G:T	rs2879828	15	85361977	G	T	0.9079	E001,2_TssAFlnk;E003,7_Enh;E004,2_TssAFlnk;E005,7_Enh;E006,7_Enh;E007,7_Enh;E008,1_TssA;E009,7_Enh;E010,7_Enh;E011,3_TxFlnk;E012,2_TssAFlnk;E013,2_TssAFlnk;E014,2_TssAFlnk;E015,2_TssAFlnk;E016,2_TssAFlnk;E017,12_EnhBiv;E018,2_TssAFlnk;E019,2_TssAFlnk;E020,2_TssAFlnk;E021,7_Enh;E022,7_Enh;E023,7_Enh;E024,7_Enh;E025,7_Enh;E026,7_Enh;E027,7_Enh;E033,2_TssAFlnk;E036,7_Enh;E041,7_Enh;E043,7_Enh;E044,7…	E083,2_TssAFlnk;E095,2_TssAFlnk;E104,2_TssAFlnk;E105,1_TssA	E004;E005;E006;E017;E021;E022;E055;E059;E080;E083;E084;E085;E086;E088;E089;E090;E091;E092;E093;E094;E098;E100;E117;E118;E120;E121;E122;E123;E125;E128	E083
123	previously not reported	ALPK3	15:85372645:A:T	rs6496452	15	85372645	A	T	15:85363348:A:G	rs6496441	15	85363348	A	G	0.85861	E005,7_Enh;E009,7_Enh;E011,3_TxFlnk;E013,6_EnhG;E052,7_Enh;E053,7_Enh;E063,7_Enh;E065,7_Enh;E066,7_Enh;E071,7_Enh;E076,7_Enh;E078,7_Enh;E080,6_EnhG;E083,2_TssAFlnk;E084,7_Enh;E085,6_EnhG;E089,2_TssAFlnk;E090,3_TxFlnk;E091,7_Enh;E092,7_Enh;E095,2_TssAFlnk;E096,7_Enh;E098,7_Enh;E100,2_TssAFlnk;E103,7_Enh;E104,7_Enh;E105,2_TssAFlnk;E107,3_TxFlnk;E108,2_TssAFlnk;E111,2_TssAFlnk;E113,7_Enh;E118,7_Enh;…	E083,2_TssAFlnk;E095,2_TssAFlnk;E104,7_Enh;E105,2_TssAFlnk	E083	E083
123	previously not reported	ALPK3	15:85372645:A:T	rs6496452	15	85372645	A	T	15:85363708:C:T	rs11854291	15	85363708	T	C	0.858289	E011,3_TxFlnk;E013,6_EnhG;E076,7_Enh;E080,6_EnhG;E083,7_Enh;E084,7_Enh;E085,6_EnhG;E089,7_Enh;E090,6_EnhG;E095,7_Enh;E100,7_Enh;E103,7_Enh;E105,7_Enh;E107,3_TxFlnk;E108,2_TssAFlnk;E111,7_Enh;E118,7_Enh;E120,6_EnhG;E121,7_Enh;E122,7_Enh	E083,7_Enh;E095,7_Enh;E105,7_Enh
123	previously not reported	ALPK3	15:85372645:A:T	rs6496452	15	85372645	A	T	15:85371944:G:T	rs7183401	15	85371944	G	T	0.927644	E002,7_Enh;E003,7_Enh;E021,6_EnhG;E023,7_Enh;E025,7_Enh;E029,7_Enh;E030,2_TssAFlnk;E063,7_Enh;E065,7_Enh;E078,7_Enh;E080,6_EnhG;E083,7_Enh;E088,7_Enh;E089,6_EnhG;E090,6_EnhG;E092,6_EnhG;E095,6_EnhG;E097,2_TssAFlnk;E098,7_Enh;E103,7_Enh;E104,7_Enh;E107,3_TxFlnk;E108,6_EnhG;E111,2_TssAFlnk;E118,12_EnhBiv;E123,7_Enh	E083,7_Enh;E095,6_EnhG;E104,7_Enh	E080;E083;E088;E089;E090;E091;E092;E097;E098;E100;E114;E120;E121	E083
123	previously not reported	ALPK3	15:85372645:A:T	rs6496452	15	85372645	A	T	15:85372645:A:T	rs6496452	15	85372645	A	T	1	E011,6_EnhG;E018,7_Enh;E030,7_Enh;E080,6_EnhG;E083,7_Enh;E090,6_EnhG;E095,6_EnhG;E097,7_Enh;E107,6_EnhG;E108,6_EnhG;E123,2_TssAFlnk	E083,7_Enh;E095,6_EnhG	E123
124	previously not reported	LINC00924 - NR2F2	15:96460899:C:T	rs62008078	15	96460899	T	C	15:96464805:C:T	rs12916136	15	96464805	C	T	0.871468	E010,7_Enh;E123,7_Enh		E083;E123	E083
125	previously not reported	SPSB3	16:1828030:A:G	rs35816944	16	1828030	G	A	16:1828030:A:G	rs35816944	16	1828030	G	A	1	E006,6_EnhG;E022,6_EnhG;E027,6_EnhG;E032,6_EnhG;E055,3_TxFlnk;E056,3_TxFlnk;E059,3_TxFlnk;E079,6_EnhG;E085,6_EnhG		E055;E056;E059;E098;E118
125	previously not reported	SPSB3	16:1828030:A:G	rs35816944	16	1828030	G	A	16:1838604:C:T	rs33933410	16	1838604	C	T	0.932959	E022,6_EnhG;E027,7_Enh;E055,6_EnhG;E056,3_TxFlnk;E057,6_EnhG;E058,3_TxFlnk;E059,6_EnhG;E066,6_EnhG;E079,6_EnhG;E119,7_Enh;E127,6_EnhG		E118
126	previously not reported	SRL	16:4282284:A:C	rs79321945	16	4282284	C	A	16:4281391:G:T	rs11864324	16	4281391	T	G	0.995597	E022,7_Enh;E083,7_Enh;E089,7_Enh;E090,6_EnhG;E095,7_Enh;E100,7_Enh;E105,7_Enh;E107,7_Enh;E108,7_Enh	E083,7_Enh;E095,7_Enh;E105,7_Enh	E008;E083;E100	E083
126	previously not reported	SRL	16:4282284:A:C	rs79321945	16	4282284	C	A	16:4281666:C:T	rs75023450	16	4281666	C	T	0.981013	E022,7_Enh;E083,7_Enh;E089,7_Enh;E090,6_EnhG;E095,7_Enh;E100,7_Enh;E107,3_TxFlnk;E108,2_TssAFlnk	E083,7_Enh;E095,7_Enh	E083;E089;E100;E121	E083
126	previously not reported	SRL	16:4282284:A:C	rs79321945	16	4282284	C	A	16:4282284:A:C	rs79321945	16	4282284	C	A	1	E083,7_Enh;E089,7_Enh;E090,7_Enh;E095,7_Enh;E096,7_Enh;E100,7_Enh;E105,1_TssA;E107,2_TssAFlnk;E108,2_TssAFlnk;E121,7_Enh	E083,7_Enh;E095,7_Enh;E105,1_TssA	E083;E097	E083
126	previously not reported	SRL	16:4282284:A:C	rs79321945	16	4282284	C	A	16:4283042:A:G	rs75928020	16	4283042	G	A	0.976666	E012,7_Enh;E027,7_Enh;E055,12_EnhBiv;E057,12_EnhBiv;E083,2_TssAFlnk;E089,7_Enh;E090,7_Enh;E092,7_Enh;E093,7_Enh;E095,7_Enh;E100,7_Enh;E105,7_Enh;E107,2_TssAFlnk;E108,2_TssAFlnk;E120,7_Enh;E121,7_Enh;E123,12_EnhBiv	E083,2_TssAFlnk;E095,7_Enh;E105,7_Enh	E082;E083;E086;E088;E089;E090;E092;E097;E100;E120;E121;E123	E083
127	previously not reported	MYH11*	16:15834729:C:T	rs72772025	16	15834729	C	T	16:15708256:D:I	rs35388673	16	15708256	D	I	0.822058	E013,6_EnhG		E021;E055;E057;E091;E125
127	previously not reported	MYH11*	16:15834729:C:T	rs72772025	16	15834729	C	T	16:15768249:A:G	rs35694612	16	15768249	G	A	0.803494	E029,7_Enh;E030,7_Enh;E032,6_EnhG;E033,6_EnhG;E034,7_Enh;E037,7_Enh;E038,7_Enh;E039,7_Enh;E040,7_Enh;E041,7_Enh;E042,7_Enh;E043,7_Enh;E044,6_EnhG;E045,7_Enh;E046,7_Enh;E047,7_Enh;E048,7_Enh;E050,7_Enh;E051,7_Enh;E053,6_EnhG;E054,7_Enh;E057,6_EnhG;E058,6_EnhG;E059,7_Enh;E061,7_Enh;E067,7_Enh;E068,7_Enh;E069,7_Enh;E071,7_Enh;E072,7_Enh;E074,7_Enh;E078,7_Enh;E118,6_EnhG;E124,7_Enh
127	previously not reported	MYH11*	16:15834729:C:T	rs72772025	16	15834729	C	T	16:15803467:C:T	rs12443661	16	15803467	C	T	0.855015	E111,6_EnhG
128	previously not reported	LOC101927480 - LINC02140	16:54598337:A:G	rs1389527	16	54598337	G	A	16:54594986:A:G		16	54594986	G	A	0.908461			E007;E080;E127
128	previously not reported	LOC101927480 - LINC02140	16:54598337:A:G	rs1186819	16	54598337	G	A	16:54598180:A:G		16	54598180	A	G	0.973248			E119
128	previously not reported	LOC101927480 - LINC02140	16:54598337:A:G	rs1186818	16	54598337	G	A	16:54598337:A:G	rs1186818	16	54598337	G	A	1	E092,7_Enh
128	previously not reported	LOC101927480 - LINC02140	16:54598337:A:G	rs1186818	16	54598337	G	A	16:54598514:A:G	rs1186817	16	54598514	G	A	0.973248	E092,7_Enh		E092
128	previously not reported	LOC101927480 - LINC02140	16:54598337:A:G	rs1186818	16	54598337	G	A	16:54599272:C:T	rs1186816	16	54599272	C	T	0.967249	E007,7_Enh;E010,7_Enh
128	previously not reported	LOC101927480 - LINC02140	16:54598337:A:G	rs1186818	16	54598337	G	A	16:54599293:A:G	rs1186815	16	54599293	G	A	0.967249	E007,7_Enh;E010,7_Enh		E120;E121
128	previously not reported	LOC101927480 - LINC02140	16:54598337:A:G	rs1186818	16	54598337	G	A	16:54599346:A:G	rs1186814	16	54599346	G	A	0.970368	E007,7_Enh;E010,7_Enh		E120;E121
128	previously not reported	LOC101927480 - LINC02140	16:54598337:A:G	rs5816960	16	54598337	G	A	16:54599824:D:I		16	54599824	I	T	0.970368			E120;E121
128	previously not reported	LOC101927480 - LINC02140	16:54598337:A:G	rs1186809	16	54598337	G	A	16:54600156:A:G		16	54600156	G	A	0.970368			E120;E121
128	previously not reported	LOC101927480 - LINC02140	16:54598337:A:G	rs1186818	16	54598337	G	A	16:54600280:A:G	rs1186808	16	54600280	G	A	0.970368	E005,7_Enh;E121,7_Enh		E121
129	previously not reported	CNOT1	16:58584772:G:T	rs7199856	16	58584772	G	T	16:58547511:D:I	rs150728296	16	58547511	D	I	0.962832	E118,7_Enh;E123,7_Enh;E125,7_Enh		E056
129	previously not reported	CNOT1	16:58584772:G:T	rs7199856	16	58584772	G	T	16:58549204:C:G	rs1646010	16	58549204	G	C	0.981086	E001,1_TssA;E002,1_TssA;E003,1_TssA;E004,1_TssA;E005,1_TssA;E006,1_TssA;E007,1_TssA;E008,1_TssA;E009,3_TxFlnk;E010,3_TxFlnk;E011,1_TssA;E012,1_TssA;E013,1_TssA;E014,1_TssA;E015,1_TssA;E016,1_TssA;E017,2_TssAFlnk;E018,1_TssA;E019,1_TssA;E020,1_TssA;E021,1_TssA;E022,3_TxFlnk;E023,1_TssA;E024,1_TssA;E025,1_TssA;E026,1_TssA;E027,1_TssA;E028,1_TssA;E029,1_TssA;E030,2_TssAFlnk;E031,2_TssAFlnk;E032,2_Ts…	E083,1_TssA;E095,1_TssA;E104,3_TxFlnk;E105,1_TssA	E003;E004;E006;E007;E008;E017;E021;E022;E028;E029;E032;E033;E034;E046;E050;E051;E055;E056;E057;E059;E080;E081;E082;E083;E084;E085;E086;E088;E089;E090;E091;E092;E093;E094;E097;E098;E100;E109;E114;E116;E117;E118;E119;E120;E121;E122;E123;E124;E125;E126;E127;E128	E083
129	previously not reported	CNOT1	16:58584772:G:T	rs7199856	16	58584772	G	T	16:58551360:C:G	rs37034	16	58551360	C	G	0.990884	E085,6_EnhG;E116,6_EnhG;E117,6_EnhG;E118,6_EnhG		E034
129	previously not reported	CNOT1	16:58584772:G:T	rs7199856	16	58584772	G	T	16:58553348:C:T	rs37036	16	58553348	T	C	0.99274	E116,3_TxFlnk
129	previously not reported	CNOT1	16:58584772:G:T	rs7199856	16	58584772	G	T	16:58553723:D:I	rs67563986	16	58553723	D	I	0.988133	E116,3_TxFlnk
129	previously not reported	CNOT1	16:58584772:G:T	rs37051	16	58584772	G	T	16:58558102:C:T		16	58558102	C	T	0.992738			E034
129	previously not reported	CNOT1	16:58584772:G:T	rs37053	16	58584772	G	T	16:58558707:C:T		16	58558707	T	C	0.994548			E114
129	previously not reported	CNOT1	16:58584772:G:T	rs37056	16	58584772	G	T	16:58560877:A:G		16	58560877	G	A	0.993615			E021;E127
129	previously not reported	CNOT1	16:58584772:G:T	rs7199856	16	58584772	G	T	16:58561954:C:T	rs37057	16	58561954	T	C	0.9927	E094,6_EnhG;E110,7_Enh
129	previously not reported	CNOT1	16:58584772:G:T	rs35216733	16	58584772	G	T	16:58565409:D:I		16	58565409	I	T	0.993615			E022
129	previously not reported	CNOT1	16:58584772:G:T	rs40188	16	58584772	G	T	16:58567761:A:T		16	58567761	T	A	0.993615			E100
129	previously not reported	CNOT1	16:58584772:G:T	rs7199856	16	58584772	G	T	16:58571189:C:T	rs2243463	16	58571189	T	C	0.998177	E094,6_EnhG
129	previously not reported	CNOT1	16:58584772:G:T	rs246196	16	58584772	G	T	16:58574253:C:T		16	58574253	T	C	0.998177			E034
129	previously not reported	CNOT1	16:58584772:G:T	rs246258	16	58584772	G	T	16:58579274:C:T		16	58579274	C	T	0.998177			E033;E094;E123
129	previously not reported	CNOT1	16:58584772:G:T	rs37041	16	58584772	G	T	16:58579886:C:T		16	58579886	T	C	0.999087			E032
129	previously not reported	CNOT1	16:58584772:G:T	rs7199856	16	58584772	G	T	16:58582949:C:T	rs12596546	16	58582949	C	T	0.999087	E049,6_EnhG;E083,6_EnhG;E107,7_Enh;E111,7_Enh	E083,6_EnhG
129	previously not reported	CNOT1	16:58584772:G:T	rs7199856	16	58584772	G	T	16:58583975:A:G	rs1549607	16	58583975	A	G	0.998175	E108,6_EnhG
129	previously not reported	CNOT1	16:58584772:G:T	rs7199856	16	58584772	G	T	16:58584772:G:T	rs7199856	16	58584772	G	T	1	E103,6_EnhG;E108,6_EnhG
129	previously not reported	CNOT1	16:58584772:G:T	rs7199856	16	58584772	G	T	16:58585369:A:C	rs7184114	16	58585369	C	A	0.840529	E078,6_EnhG;E103,6_EnhG;E107,6_EnhG
129	previously not reported	CNOT1	16:58584772:G:T	rs8053455	16	58584772	G	T	16:58591708:C:T		16	58591708	T	C	0.998173			E021
129	previously not reported	CNOT1	16:58584772:G:T	rs7199856	16	58584772	G	T	16:58597289:C:G	rs1981960	16	58597289	C	G	0.993621	E023,6_EnhG;E025,6_EnhG;E028,7_Enh;E049,6_EnhG;E052,6_EnhG;E055,7_Enh;E058,6_EnhG;E119,7_Enh;E120,6_EnhG;E122,6_EnhG;E125,7_Enh;E126,7_Enh;E127,7_Enh;E129,6_EnhG		E006;E028;E055;E056;E057;E059;E091;E119;E125;E127;E128
129	previously not reported	CNOT1	16:58584772:G:T	rs7199856	16	58584772	G	T	16:58597291:A:T	rs1981961	16	58597291	A	T	0.993621	E023,6_EnhG;E025,6_EnhG;E028,7_Enh;E049,6_EnhG;E052,6_EnhG;E055,7_Enh;E058,6_EnhG;E119,7_Enh;E120,6_EnhG;E122,6_EnhG;E125,7_Enh;E126,7_Enh;E127,7_Enh;E129,6_EnhG		E006;E028;E055;E056;E057;E059;E091;E119;E121;E125;E127;E128
129	previously not reported	CNOT1	16:58584772:G:T	rs7199856	16	58584772	G	T	16:58610750:A:C	rs6499962	16	58610750	A	C	0.997261	E087,7_Enh
129	previously not reported	CNOT1	16:58584772:G:T	rs9932944	16	58584772	G	T	16:58616165:C:T		16	58616165	C	T	0.997261			E118
129	previously not reported	CNOT1	16:58584772:G:T	rs7199856	16	58584772	G	T	16:58617920:A:G	rs28667004	16	58617920	G	A	0.997261	E023,6_EnhG;E030,6_EnhG;E066,6_EnhG
129	previously not reported	CNOT1	16:58584772:G:T	rs7199856	16	58584772	G	T	16:58618300:A:T	rs35239829	16	58618300	T	A	0.997261	E023,6_EnhG;E030,6_EnhG
129	previously not reported	CNOT1	16:58584772:G:T	rs950843	16	58584772	G	T	16:58620885:C:T		16	58620885	C	T	0.998173			E005
129	previously not reported	CNOT1	16:58584772:G:T	rs7199856	16	58584772	G	T	16:58625385:C:T	rs12925702	16	58625385	C	T	0.995444	E066,6_EnhG;E118,6_EnhG
129	previously not reported	CNOT1	16:58584772:G:T	rs7199856	16	58584772	G	T	16:58625756:A:T	rs8051650	16	58625756	A	T	0.995444	E066,7_Enh;E118,6_EnhG
129	previously not reported	CNOT1	16:58584772:G:T	rs7199856	16	58584772	G	T	16:58628445:C:T	rs2897253	16	58628445	C	T	0.995444	E029,6_EnhG		E109
129	previously not reported	CNOT1	16:58584772:G:T	rs7199856	16	58584772	G	T	16:58629324:D:I	rs57122392	16	58629324	I	C	0.838848	E050,6_EnhG
129	previously not reported	CNOT1	16:58584772:G:T	rs7199856	16	58584772	G	T	16:58630167:C:T	rs9935054	16	58630167	T	C	0.998173	E062,6_EnhG		E100
129	previously not reported	CNOT1	16:58584772:G:T	rs7199856	16	58584772	G	T	16:58634751:A:C	rs4496133	16	58634751	C	A	0.995444	E042,6_EnhG;E044,6_EnhG;E046,6_EnhG;E047,7_Enh;E053,6_EnhG;E071,7_Enh;E074,7_Enh;E080,7_Enh;E094,6_EnhG;E110,7_Enh;E114,6_EnhG
129	previously not reported	CNOT1	16:58584772:G:T	rs7199856	16	58584772	G	T	16:58635162:C:T	rs12232402	16	58635162	T	C	0.998173	E034,6_EnhG;E038,7_Enh;E041,6_EnhG;E046,7_Enh;E047,7_Enh;E053,6_EnhG;E080,7_Enh;E110,7_Enh
129	previously not reported	CNOT1	16:58584772:G:T	rs7199856	16	58584772	G	T	16:58635233:C:G	rs12232436	16	58635233	G	C	0.998173	E024,6_EnhG;E034,6_EnhG;E038,7_Enh;E041,6_EnhG;E046,7_Enh;E080,7_Enh;E110,7_Enh
129	previously not reported	CNOT1	16:58584772:G:T	rs7199856	16	58584772	G	T	16:58636871:A:G	rs7205071	16	58636871	G	A	0.998173	E032,7_Enh;E034,7_Enh;E037,7_Enh;E039,7_Enh;E040,7_Enh;E041,7_Enh;E042,7_Enh;E043,7_Enh;E044,7_Enh;E045,7_Enh;E047,7_Enh;E048,7_Enh;E049,7_Enh;E066,7_Enh;E080,7_Enh;E106,6_EnhG;E110,7_Enh;E114,6_EnhG
129	previously not reported	CNOT1	16:58584772:G:T	rs7199856	16	58584772	G	T	16:58637528:C:G	rs4784051	16	58637528	C	G	0.995444	E006,7_Enh;E013,6_EnhG;E017,7_Enh;E027,7_Enh;E028,7_Enh;E032,7_Enh;E034,7_Enh;E036,6_EnhG;E037,7_Enh;E038,7_Enh;E039,7_Enh;E040,7_Enh;E041,7_Enh;E042,2_TssAFlnk;E043,7_Enh;E044,7_Enh;E045,7_Enh;E047,7_Enh;E048,7_Enh;E049,7_Enh;E050,7_Enh;E051,7_Enh;E052,7_Enh;E055,7_Enh;E059,7_Enh;E066,7_Enh;E068,7_Enh;E074,7_Enh;E076,7_Enh;E077,7_Enh;E080,7_Enh;E081,1_TssA;E083,7_Enh;E087,7_Enh;E094,7_Enh;E097,7…	E083,7_Enh;E104,7_Enh	E006;E022;E028;E033;E034;E050;E083;E097;E098;E116;E124;E125	E083
[truncated: 1,421 more rows]
