# Supplementary material for: Multi-ancestry GWAS of the electrocardiographic PR interval identifies 202 loci underlying cardiac conduction
Source: Nat Commun. 2020 May 21;11:2542. doi: 10.1038/s41467-020-15706-x (PMC7242331; doi:10.1038/s41467-020-15706-x)
Supplement: Supplementary file 19 — Supplementary Data 16 [file 41467_2020_15706_MOESM19_ESM.xlsx]

## Sheet: SD16 HiC
Supplementary Data 16 HiC results for all lead and conditionally independent variants or their proxies (r2>0.8) within previously not reported (a) and previously reported loci (b) for PR interval.
Position, base pair position in build 37; r2, r-squared between the lead or conditionally independent variant and the proxy variant.
* These loci reached genome-wide significance in the European ancestry meta-analysis and were borderline genome-wide significant in the multi-ancestry meta-analysis (P<5.4×10-7).
LocusID	Nearest gene	rsID	MarkerName	Variant Type	Chr	Position	MarkerName of proxy variant	r2	Left ventricle HiC interactor	Left ventricle best HiC locus interactor	RegulomeDB score of left ventricle best HiC locus interactor
(a) previously not reported loci
1	HSPG2	rs7529220	1:22282619:C:T	lead	1	22282619	1:22282619:C:T	1	USP48;UBR4	USP48	4
1		rs7529220	1:22282619:C:T	lead	1	22282619	1:22282117:A:C	0.888103	USP48;UBR4	USP48	4
1		rs7529220	1:22282619:C:T	lead	1	22282619	1:22283583:A:G	0.935455	USP48;UBR4	USP48	4
1		rs7529220	1:22282619:C:T	lead	1	22282619	1:22278790:A:G	0.873752	USP48;HNRNPR	USP48	5
1		rs7529220	1:22282619:C:T	lead	1	22282619	1:22279191:A:G	0.873752	USP48;HNRNPR	USP48	5
1		rs7529220	1:22282619:C:T	lead	1	22282619	1:22279280:A:C	0.872715	USP48;HNRNPR	USP48	5
1		rs7529220	1:22282619:C:T	lead	1	22282619	1:22281664:A:G	0.873891	USP48;UBR4	USP48	5
1		rs7529220	1:22282619:C:T	lead	1	22282619	1:22281690:A:G	0.871305	USP48;UBR4	USP48	5
1		rs7529220	1:22282619:C:T	lead	1	22282619	1:22281718:A:T	0.873891	USP48;UBR4	USP48	5
1		rs7529220	1:22282619:C:T	lead	1	22282619	1:22281759:A:G	0.874582	USP48;UBR4	USP48	5
2	AIM1L	rs12031946	1:26679041:C:T	lead	1	26679041	1:26679041:C:T	1	STMN1;NCMAP;PDIK1L;CEP85;GALE	STMN1	4
3	MAP7D1	rs1475267	1:36620801:C:G	lead	1	36620801	1:36620801:C:G	1	SNIP1;STK40;THRAP3;OSCP1;RRAGC;LINC01137;NDUFS5;PSMB2	SNIP1	2b
3		rs1475267	1:36620801:C:G	lead	1	36620801	1:36622730:C:T	0.96646	SNIP1;STK40;THRAP3;OSCP1;RRAGC;LINC01137;NDUFS5;PSMB2	SNIP1	2b
3		rs1475267	1:36620801:C:G	lead	1	36620801	1:36636095:D:I	0.893223	SNIP1;STK40;THRAP3;OSCP1;RRAGC;LINC01137;NDUFS5;PSMB2	SNIP1	5
5	SSBP3	rs603901	1:54741767:C:T	lead	1	54741767	1:54742078:A:G	0.995477	SSBP3;MROH7;TTC4;CYB5RL;PLPP3;PARS2;TXNDC12;DAB1;GPX7	SSBP3	4
5		rs603901	1:54741767:C:T	lead	1	54741767	1:54741767:C:T	1	SSBP3;MROH7;TTC4;CYB5RL;PLPP3;PARS2;TXNDC12;DAB1;GPX7	SSBP3	5
5		rs603901	1:54741767:C:T	lead	1	54741767	1:54742471:C:T	0.987387	SSBP3;MROH7;TTC4;CYB5RL;PLPP3;PARS2;TXNDC12;DAB1;GPX7	SSBP3	5
5		rs603901	1:54741767:C:T	lead	1	54741767	1:54742618:A:G	0.880537	SSBP3;MROH7;TTC4;CYB5RL;PLPP3;PARS2;TXNDC12;DAB1;GPX7	SSBP3	5
6	NFIA	rs6587924	1:61895257:A:C	lead	1	61895257	1:61909126:A:G	0.838329	NFIA;HSD52;CYP2J2;MIR4711;PATJ;TACSTD2;MGC34796;MYSM1;C1orf87	NFIA	3a
6		rs6587924	1:61895257:A:C	lead	1	61895257	1:61886744:C:T	0.887054	NFIA;HSD52;CYP2J2;MIR4711;PATJ;TACSTD2;MGC34796;MYSM1;C1orf87	NFIA	5
6		rs6587924	1:61895257:A:C	lead	1	61895257	1:61897967:A:G	0.924737	NFIA;HSD52;CYP2J2;MIR4711;PATJ;TACSTD2;MGC34796;MYSM1;C1orf87	NFIA	5
6		rs6587924	1:61895257:A:C	lead	1	61895257	1:61899519:A:G	0.925632	NFIA;HSD52;CYP2J2;MIR4711;PATJ;TACSTD2;MGC34796;MYSM1;C1orf87	NFIA	5
7	CDC7	rs13447455	1:91966445:A:G	lead	1	91966445	1:91965850:C:T	0.944475	TGFBR3;RPAP2;BRDT;GFI1;KIAA1107;BTBD8;EPHX4;EVI5;FAM69A;ZNF644;TMED5;HFM1;CCDC18-AS1;RPL5;GTF2B;GBP3;FNBP1L;GCLM;GBP7;ABCD3;ABCA4;CCDC18;GBP2;DNTTIP2	TGFBR3	1f
7		rs13447455	1:91966445:A:G	lead	1	91966445	1:91966445:A:G	1	TGFBR3;RPAP2;BRDT;GFI1;KIAA1107;BTBD8;EPHX4;EVI5;FAM69A;ZNF644;TMED5;HFM1;CCDC18-AS1;RPL5;GTF2B;GBP3;FNBP1L;GCLM;GBP7;ABCD3;ABCA4;CCDC18;GBP2;DNTTIP2	TGFBR3	4
8	GJA5	rs112057010	1:146598683:A:G	conditional	1	146598683	1:146764675:D:I	0.837205	PDE4DIP	PDE4DIP	2b
8		rs112057010	1:146598683:A:G	conditional	1	146598683	1:146570006:C:T	0.928223	ACP6	PDE4DIP	3a
8		rs112057010	1:146598683:A:G	conditional	1	146598683	1:146578201:D:I	0.933157	ACP6	PDE4DIP	3a
8		rs112057010	1:146598683:A:G	conditional	1	146598683	1:146578226:C:T	0.928223	ACP6	PDE4DIP	3a
8		rs112057010	1:146598683:A:G	conditional	1	146598683	1:146582724:C:G	0.952619	ACP6	PDE4DIP	3a
8		rs112057010	1:146598683:A:G	conditional	1	146598683	1:146745375:G:T	0.847013	ACP6;BCL9;PDE4DIP;GJA8;LOC728989	PDE4DIP	3a
8		rs112057010	1:146598683:A:G	conditional	1	146598683	1:146570076:A:G	0.928223	ACP6	PDE4DIP	4
8		rs112057010	1:146598683:A:G	conditional	1	146598683	1:146575945:A:C	0.952797	ACP6	PDE4DIP	4
8		rs112057010	1:146598683:A:G	conditional	1	146598683	1:146578261:A:C	0.928223	ACP6	PDE4DIP	4
8		rs112057010	1:146598683:A:G	conditional	1	146598683	1:146578263:D:I	0.924266	ACP6	PDE4DIP	4
8		rs112057010	1:146598683:A:G	conditional	1	146598683	1:146578307:A:T	0.928223	ACP6	PDE4DIP	4
8		rs112057010	1:146598683:A:G	conditional	1	146598683	1:146579535:A:C	0.928223	ACP6	PDE4DIP	4
8		rs112057010	1:146598683:A:G	conditional	1	146598683	1:146579574:C:T	0.928223	ACP6	PDE4DIP	4
8		rs112057010	1:146598683:A:G	conditional	1	146598683	1:146581676:C:T	0.947495	ACP6	PDE4DIP	4
8		rs112057010	1:146598683:A:G	conditional	1	146598683	1:146581801:A:G	0.947495	ACP6	PDE4DIP	4
8		rs112057010	1:146598683:A:G	conditional	1	146598683	1:146585825:A:G	0.947495	ACP6	PDE4DIP	4
8		rs112057010	1:146598683:A:G	conditional	1	146598683	1:146595897:G:T	0.979272	ACP6	PDE4DIP	4
8		rs112057010	1:146598683:A:G	conditional	1	146598683	1:146788870:C:T	0.832351	PDE4DIP	PDE4DIP	4
8		rs112057010	1:146598683:A:G	conditional	1	146598683	1:146570268:C:T	0.933497	ACP6	PDE4DIP	5
8		rs112057010	1:146598683:A:G	conditional	1	146598683	1:146577525:A:G	0.928223	ACP6	PDE4DIP	5
8		rs112057010	1:146598683:A:G	conditional	1	146598683	1:146577541:D:I	0.928223	ACP6	PDE4DIP	5
8		rs112057010	1:146598683:A:G	conditional	1	146598683	1:146577579:CCT-C:CCTCT	0.922273	ACP6	PDE4DIP	5
8		rs112057010	1:146598683:A:G	conditional	1	146598683	1:146577889:C:T	0.928223	ACP6	PDE4DIP	5
8		rs112057010	1:146598683:A:G	conditional	1	146598683	1:146579688:A:G	0.928223	ACP6	PDE4DIP	5
8		rs112057010	1:146598683:A:G	conditional	1	146598683	1:146581857:C:T	0.947495	ACP6	PDE4DIP	5
8		rs112057010	1:146598683:A:G	conditional	1	146598683	1:146582876:D:I	0.947495	ACP6	PDE4DIP	5
8		rs112057010	1:146598683:A:G	conditional	1	146598683	1:146583429:A:G	0.895273	ACP6	PDE4DIP	5
8		rs112057010	1:146598683:A:G	conditional	1	146598683	1:146583568:A:G	0.947495	ACP6	PDE4DIP	5
8		rs112057010	1:146598683:A:G	conditional	1	146598683	1:146583569:A:T	0.947495	ACP6	PDE4DIP	5
8		rs112057010	1:146598683:A:G	conditional	1	146598683	1:146588768:A:G	0.947495	ACP6	PDE4DIP	5
8		rs112057010	1:146598683:A:G	conditional	1	146598683	1:146589293:A:C	0.928223	ACP6	PDE4DIP	5
8		rs112057010	1:146598683:A:G	conditional	1	146598683	1:146589420:C:G	0.928223	ACP6	PDE4DIP	5
8		rs112057010	1:146598683:A:G	conditional	1	146598683	1:146591674:C:T	0.947495	ACP6	PDE4DIP	5
8		rs112057010	1:146598683:A:G	conditional	1	146598683	1:146592098:C:T	0.947495	ACP6	PDE4DIP	5
8		rs112057010	1:146598683:A:G	conditional	1	146598683	1:146592123:C:T	0.947495	ACP6	PDE4DIP	5
8		rs112057010	1:146598683:A:G	conditional	1	146598683	1:146592296:C:T	0.984075	ACP6	PDE4DIP	5
8		rs112057010	1:146598683:A:G	conditional	1	146598683	1:146637585:C:T	0.927237	PDE4DIP	PDE4DIP	5
8		rs112057010	1:146598683:A:G	conditional	1	146598683	1:146736092:C:T	0.842092	ACP6;BCL9;PDE4DIP;GJA8;LOC728989	PDE4DIP	5
8		rs112057010	1:146598683:A:G	conditional	1	146598683	1:146736548:G:T	0.847013	ACP6;BCL9;PDE4DIP;GJA8;LOC728989	PDE4DIP	5
8		rs112057010	1:146598683:A:G	conditional	1	146598683	1:146741537:G:T	0.847013	ACP6;BCL9;PDE4DIP;GJA8;LOC728989	PDE4DIP	5
8		rs112057010	1:146598683:A:G	conditional	1	146598683	1:146749181:C:T	0.842092	ACP6;BCL9;PDE4DIP;GJA8;LOC728989	PDE4DIP	5
8		rs112057010	1:146598683:A:G	conditional	1	146598683	1:146749611:C:T	0.842092	ACP6;BCL9;PDE4DIP;GJA8;LOC728989	PDE4DIP	5
8		rs112057010	1:146598683:A:G	conditional	1	146598683	1:146759306:C:T	0.832363	ACP6;BCL9;PDE4DIP;GJA8;LOC728989	PDE4DIP	5
8		rs112057010	1:146598683:A:G	conditional	1	146598683	1:146760908:D:I	0.837205	PDE4DIP	PDE4DIP	5
8		rs112057010	1:146598683:A:G	conditional	1	146598683	1:146767770:C:T	0.837205	PDE4DIP	PDE4DIP	5
8		rs112057010	1:146598683:A:G	conditional	1	146598683	1:146769253:D:I	0.837205	PDE4DIP	PDE4DIP	5
8		rs112057010	1:146598683:A:G	conditional	1	146598683	1:146769990:C:G	0.837205	PDE4DIP	PDE4DIP	5
8		rs112057010	1:146598683:A:G	conditional	1	146598683	1:146773253:C:T	0.837205	PDE4DIP	PDE4DIP	5
8		rs112057010	1:146598683:A:G	conditional	1	146598683	1:146775112:D:I	0.837205	PDE4DIP	PDE4DIP	5
8		rs112057010	1:146598683:A:G	conditional	1	146598683	1:146785157:A:G	0.832351	PDE4DIP	PDE4DIP	5
8		rs112057010	1:146598683:A:G	conditional	1	146598683	1:146788287:A:G	0.832351	PDE4DIP	PDE4DIP	5
8		rs112057010	1:146598683:A:G	conditional	1	146598683	1:146790598:A:G	0.832351	PDE4DIP	PDE4DIP	5
8		rs112057010	1:146598683:A:G	conditional	1	146598683	1:146791020:A:G	0.832351	PDE4DIP	PDE4DIP	5
8		rs112057010	1:146598683:A:G	conditional	1	146598683	1:146791101:C:G	0.832351	PDE4DIP	PDE4DIP	5
8		rs112057010	1:146598683:A:G	conditional	1	146598683	1:146799262:G:T	0.832351	PDE4DIP	PDE4DIP	5
9	DPT	rs531706	1:168692137:C:G	lead	1	168692137	1:168689291:A:C	0.992239	LINC00626;SLC19A2;CCDC181;NME7;SELP;ATP1B1;XCL1;ADCY10;SCYL3;TIPRL;POGK;ANKRD36BP1;DCAF6;LOC100505918;MROH9;POU2F1;KIFAP3;VAMP4;METTL11B;XCL2	LINC00626	3a
9		rs531706	1:168692137:C:G	lead	1	168692137	1:168692244:C:T	0.84395	LINC00626;SLC19A2;CCDC181;NME7;SELP;ATP1B1;XCL1;ADCY10;SCYL3;TIPRL;POGK;ANKRD36BP1;DCAF6;LOC100505918;MROH9;POU2F1;KIFAP3;VAMP4;METTL11B;XCL2	LINC00626	5
9		rs531706	1:168692137:C:G	lead	1	168692137	1:168692515:C:G	0.843436	LINC00626;SLC19A2;CCDC181;NME7;SELP;ATP1B1;XCL1;ADCY10;SCYL3;TIPRL;POGK;ANKRD36BP1;DCAF6;LOC100505918;MROH9;POU2F1;KIFAP3;VAMP4;METTL11B;XCL2	LINC00626	5
10	PRRX1	rs61824886	1:170615660:C:G	lead	1	170615660	1:170592385:C:T	0.81668	KIFAP3;METTL11B;SCYL3;PRRX1;MIR3119-2;LINC01142;SELL;MROH9;PIGC;SLC19A2;PRRC2C;C1orf112;DPT;ANKRD36BP1;CCDC181;GORAB;DNM3;LOC100505918;FMO1;TNFSF4;XCL2;LOC100506023;SLC9C2;TBX19	KIFAP3	4
10		rs61824886	1:170615660:C:G	lead	1	170615660	1:170582610:A:G	0.937401	KIFAP3;METTL11B;SCYL3;PRRX1;MIR3119-2;LINC01142;SELL;MROH9;PIGC;SLC19A2;PRRC2C;C1orf112;DPT;ANKRD36BP1;CCDC181;GORAB;DNM3;LOC100505918;FMO1;TNFSF4;XCL2;LOC100506023;SLC9C2;TBX19	KIFAP3	5
10		rs61824886	1:170615660:C:G	lead	1	170615660	1:170583409:C:T	0.815099	KIFAP3;METTL11B;SCYL3;PRRX1;MIR3119-2;LINC01142;SELL;MROH9;PIGC;SLC19A2;PRRC2C;C1orf112;DPT;ANKRD36BP1;CCDC181;GORAB;DNM3;LOC100505918;FMO1;TNFSF4;XCL2;LOC100506023;SLC9C2;TBX19	KIFAP3	5
10		rs61824886	1:170615660:C:G	lead	1	170615660	1:170583499:C:G	0.937401	KIFAP3;METTL11B;SCYL3;PRRX1;MIR3119-2;LINC01142;SELL;MROH9;PIGC;SLC19A2;PRRC2C;C1orf112;DPT;ANKRD36BP1;CCDC181;GORAB;DNM3;LOC100505918;FMO1;TNFSF4;XCL2;LOC100506023;SLC9C2;TBX19	KIFAP3	5
10		rs61824886	1:170615660:C:G	lead	1	170615660	1:170586551:C:G	0.895001	KIFAP3;METTL11B;SCYL3;PRRX1;MIR3119-2;LINC01142;SELL;MROH9;PIGC;SLC19A2;PRRC2C;C1orf112;DPT;ANKRD36BP1;CCDC181;GORAB;DNM3;LOC100505918;FMO1;TNFSF4;XCL2;LOC100506023;SLC9C2;TBX19	KIFAP3	5
10		rs61824886	1:170615660:C:G	lead	1	170615660	1:170590849:A:G	0.902156	KIFAP3;METTL11B;SCYL3;PRRX1;MIR3119-2;LINC01142;SELL;MROH9;PIGC;SLC19A2;PRRC2C;C1orf112;DPT;ANKRD36BP1;CCDC181;GORAB;DNM3;LOC100505918;FMO1;TNFSF4;XCL2;LOC100506023;SLC9C2;TBX19	KIFAP3	5
10		rs61824886	1:170615660:C:G	lead	1	170615660	1:170597122:C:G	0.805864	KIFAP3;METTL11B;SCYL3;PRRX1;MIR3119-2;LINC01142;SELL;MROH9;PIGC;SLC19A2;PRRC2C;C1orf112;DPT;ANKRD36BP1;CCDC181;GORAB;DNM3;LOC100505918;FMO1;TNFSF4;XCL2;LOC100506023;SLC9C2;TBX19	KIFAP3	5
10		rs61824886	1:170615660:C:G	lead	1	170615660	1:170611354:A:G	0.951019	KIFAP3;METTL11B;MROH9;MIR3119-2;PIGC;MPZL1;SELP;PRRC2C;CCDC181;C1orf112;XCL1	KIFAP3	5
10		rs61824886	1:170615660:C:G	lead	1	170615660	1:170616727:A:C	0.837762	KIFAP3;METTL11B;MROH9;MIR3119-2;PIGC;MPZL1;SELP;PRRC2C;CCDC181;C1orf112;XCL1	KIFAP3	5
10		rs61817383	1:170665348:C:T	conditional	1	170665348	1:170662120:A:G	0.985301	METTL11B;KIFAP3;MIR3119-2;DPT;SCYL3;MROH9;GORAB;XCL1;F5;FMO6P;FASLG	METTL11B	2b
10		rs61817383	1:170665348:C:T	conditional	1	170665348	1:170671541:A:G	0.870537	METTL11B;KIFAP3;MIR3119-2;DPT;SCYL3;MROH9;GORAB;XCL1;F5;FMO6P;FASLG	METTL11B	4
10		rs61817383	1:170665348:C:T	conditional	1	170665348	1:170645774:C:G	0.869784	METTL11B;KIFAP3;MIR3119-2;DPT;SCYL3;MROH9;GORAB;XCL1;F5;FMO6P;FASLG	METTL11B	5
10		rs61817383	1:170665348:C:T	conditional	1	170665348	1:170665348:C:T	1	METTL11B;KIFAP3;MIR3119-2;DPT;SCYL3;MROH9;GORAB;XCL1;F5;FMO6P;FASLG	METTL11B	5
10		rs61817383	1:170665348:C:T	conditional	1	170665348	1:170686662:C:T	0.852695	METTL11B;KIFAP3;MIR3119-2;SCYL3;FASLG;SELL;GORAB;XCL2;C1orf105;SLC19A2;LINC01142;PRRX1;LINC00626;F5;PRRC2C;CCDC181;C1orf112;MIR3120;TNFSF18;PIGC	METTL11B	5
10		rs61817383	1:170665348:C:T	conditional	1	170665348	1:170692104:C:T	0.847662	METTL11B;KIFAP3;MIR3119-2;SCYL3;FASLG;SELL;GORAB;XCL2;C1orf105;SLC19A2;LINC01142;PRRX1;LINC00626;F5;PRRC2C;CCDC181;C1orf112;MIR3120;TNFSF18;PIGC	METTL11B	5
10		rs61817383	1:170665348:C:T	conditional	1	170665348	1:170699149:A:G	0.847662	METTL11B;KIFAP3;MIR3119-2;SCYL3;FASLG;SELL;GORAB;XCL2;C1orf105;SLC19A2;LINC01142;PRRX1;LINC00626;F5;PRRC2C;CCDC181;C1orf112;MIR3120;TNFSF18;PIGC	METTL11B	5
11	C1orf98	rs819636	1:200271408:C:T	lead	1	200271408	1:200271408:C:T	1	DENND1B;NEK7;MIR181B1;LINC00862	DENND1B	4
12	HLX	rs6678632	1:221138612:C:T	lead	1	221138612	1:221140832:C:T	0.996062	C1orf140;AURKAPS1;DISP1;HLX;HHIPL2;MIA3;SLC30A10;TGFB2-AS1	C1orf140	2b
12		rs6678632	1:221138612:C:T	lead	1	221138612	1:221135671:A:G	0.994484	C1orf140;AURKAPS1;DISP1;HLX;HHIPL2;MIA3;SLC30A10;TGFB2-AS1	C1orf140	4
12		rs6678632	1:221138612:C:T	lead	1	221138612	1:221126914:A:G	0.954625	C1orf140;AURKAPS1;DISP1;HLX;HHIPL2;MIA3;SLC30A10;TGFB2-AS1	C1orf140	5
12		rs6678632	1:221138612:C:T	lead	1	221138612	1:221136787:C:T	0.992896	C1orf140;AURKAPS1;DISP1;HLX;HHIPL2;MIA3;SLC30A10;TGFB2-AS1	C1orf140	5
13	ADCK3	rs3768419	1:227173477:C:G	lead	1	227173477	1:227183434:C:T	0.883858	CDC42BPA;PSEN2;COQ8A;ZNF678;TAF5L;ENAH;RHOU	CDC42BPA	2a
13		rs3768419	1:227173477:C:G	lead	1	227173477	1:227175967:D:I	0.994518	CDC42BPA;PSEN2;COQ8A;ZNF678;TAF5L;ENAH;RHOU	CDC42BPA	2b
13		rs3768419	1:227173477:C:G	lead	1	227173477	1:227181838:G:T	0.883858	CDC42BPA;PSEN2;COQ8A;ZNF678;TAF5L;ENAH;RHOU	CDC42BPA	2b
13		rs3768419	1:227173477:C:G	lead	1	227173477	1:227198434:D:I	0.852816	CDC42BPA;PSEN2;COQ8A;ZNF678;TAF5L;ENAH;RHOU	CDC42BPA	3a
13		rs3768419	1:227173477:C:G	lead	1	227173477	1:227171584:D:I	0.827186	CDC42BPA;PSEN2;COQ8A;ZNF678;TAF5L;ENAH;RHOU	CDC42BPA	4
13		rs3768419	1:227173477:C:G	lead	1	227173477	1:227172903:A:G	0.879298	CDC42BPA;PSEN2;COQ8A;ZNF678;TAF5L;ENAH;RHOU	CDC42BPA	4
13		rs3768419	1:227173477:C:G	lead	1	227173477	1:227172935:C:G	0.864723	CDC42BPA;PSEN2;COQ8A;ZNF678;TAF5L;ENAH;RHOU	CDC42BPA	4
13		rs3768419	1:227173477:C:G	lead	1	227173477	1:227173477:C:G	1	CDC42BPA;PSEN2;COQ8A;ZNF678;TAF5L;ENAH;RHOU	CDC42BPA	4
13		rs3768419	1:227173477:C:G	lead	1	227173477	1:227173892:A:T	0.890113	CDC42BPA;PSEN2;COQ8A;ZNF678;TAF5L;ENAH;RHOU	CDC42BPA	4
13		rs3768419	1:227173477:C:G	lead	1	227173477	1:227174210:C:T	0.901467	CDC42BPA;PSEN2;COQ8A;ZNF678;TAF5L;ENAH;RHOU	CDC42BPA	4
13		rs3768419	1:227173477:C:G	lead	1	227173477	1:227176162:C:G	0.891154	CDC42BPA;PSEN2;COQ8A;ZNF678;TAF5L;ENAH;RHOU	CDC42BPA	4
13		rs3768419	1:227173477:C:G	lead	1	227173477	1:227176164:D:I	0.90986	CDC42BPA;PSEN2;COQ8A;ZNF678;TAF5L;ENAH;RHOU	CDC42BPA	4
13		rs3768419	1:227173477:C:G	lead	1	227173477	1:227181554:C:G	0.879768	CDC42BPA;PSEN2;COQ8A;ZNF678;TAF5L;ENAH;RHOU	CDC42BPA	4
13		rs3768419	1:227173477:C:G	lead	1	227173477	1:227181923:C:T	0.805382	CDC42BPA;PSEN2;COQ8A;ZNF678;TAF5L;ENAH;RHOU	CDC42BPA	4
13		rs3768419	1:227173477:C:G	lead	1	227173477	1:227190233:A:G	0.859854	CDC42BPA;PSEN2;COQ8A;ZNF678;TAF5L;ENAH;RHOU	CDC42BPA	4
13		rs3768419	1:227173477:C:G	lead	1	227173477	1:227174823:D:I	0.995429	CDC42BPA;PSEN2;COQ8A;ZNF678;TAF5L;ENAH;RHOU	CDC42BPA	5
13		rs3768419	1:227173477:C:G	lead	1	227173477	1:227175245:D:I	0.816899	CDC42BPA;PSEN2;COQ8A;ZNF678;TAF5L;ENAH;RHOU	CDC42BPA	5
13		rs3768419	1:227173477:C:G	lead	1	227173477	1:227175367:G:T	0.846975	CDC42BPA;PSEN2;COQ8A;ZNF678;TAF5L;ENAH;RHOU	CDC42BPA	5
13		rs3768419	1:227173477:C:G	lead	1	227173477	1:227177061:C:T	0.994518	CDC42BPA;PSEN2;COQ8A;ZNF678;TAF5L;ENAH;RHOU	CDC42BPA	5
13		rs3768419	1:227173477:C:G	lead	1	227173477	1:227177193:A:G	0.969351	CDC42BPA;PSEN2;COQ8A;ZNF678;TAF5L;ENAH;RHOU	CDC42BPA	5
13		rs3768419	1:227173477:C:G	lead	1	227173477	1:227177293:A:G	0.993599	CDC42BPA;PSEN2;COQ8A;ZNF678;TAF5L;ENAH;RHOU	CDC42BPA	5
13		rs3768419	1:227173477:C:G	lead	1	227173477	1:227177444:A:G	0.900337	CDC42BPA;PSEN2;COQ8A;ZNF678;TAF5L;ENAH;RHOU	CDC42BPA	5
13		rs3768419	1:227173477:C:G	lead	1	227173477	1:227178962:C:T	0.883858	CDC42BPA;PSEN2;COQ8A;ZNF678;TAF5L;ENAH;RHOU	CDC42BPA	5
13		rs3768419	1:227173477:C:G	lead	1	227173477	1:227179501:D:I	0.883858	CDC42BPA;PSEN2;COQ8A;ZNF678;TAF5L;ENAH;RHOU	CDC42BPA	5
13		rs3768419	1:227173477:C:G	lead	1	227173477	1:227180947:A:C	0.994518	CDC42BPA;PSEN2;COQ8A;ZNF678;TAF5L;ENAH;RHOU	CDC42BPA	5
13		rs3768419	1:227173477:C:G	lead	1	227173477	1:227180981:C:T	0.994518	CDC42BPA;PSEN2;COQ8A;ZNF678;TAF5L;ENAH;RHOU	CDC42BPA	5
13		rs3768419	1:227173477:C:G	lead	1	227173477	1:227183125:C:T	0.882034	CDC42BPA;PSEN2;COQ8A;ZNF678;TAF5L;ENAH;RHOU	CDC42BPA	5
13		rs3768419	1:227173477:C:G	lead	1	227173477	1:227188371:A:C	0.859854	CDC42BPA;PSEN2;COQ8A;ZNF678;TAF5L;ENAH;RHOU	CDC42BPA	5
13		rs3768419	1:227173477:C:G	lead	1	227173477	1:227189969:C:T	0.883858	CDC42BPA;PSEN2;COQ8A;ZNF678;TAF5L;ENAH;RHOU	CDC42BPA	5
13		rs3768419	1:227173477:C:G	lead	1	227173477	1:227192579:A:C	0.876418	CDC42BPA;PSEN2;COQ8A;ZNF678;TAF5L;ENAH;RHOU	CDC42BPA	5
13		rs3768419	1:227173477:C:G	lead	1	227173477	1:227197685:A:G	0.87563	CDC42BPA;PSEN2;COQ8A;ZNF678;TAF5L;ENAH;RHOU	CDC42BPA	5
13		rs3768419	1:227173477:C:G	lead	1	227173477	1:227197875:A:G	0.874778	CDC42BPA;PSEN2;COQ8A;ZNF678;TAF5L;ENAH;RHOU	CDC42BPA	5
14	SIPA1L2	rs1285678	1:232712145:A:G	lead	1	232712145	1:232712430:C:T	0.916979	SIPA1L2;PCNX2;NTPCR;EXOC8;EGLN1;LINC00582;DISC2;DISC1;MIR4671;SLC35F3;IRF2BP2;TSNAX-DISC1;GALNT2;GNPAT;LINC01354;TARBP1	SIPA1L2	5
15	RYR2	rs10802580	1:237194922:A:G	lead	1	237194922	1:237194922:A:G	1	RYR2;MTR;LINC01132	RYR2	4
16	SMYD3	rs28468565	1:246157144:A:G	lead	1	246157144	1:246154092:C:T	0.981328	KIF26B;EFCAB2;SMYD3;COX20;LOC339529;CEP170	KIF26B	2a
16		rs28468565	1:246157144:A:G	lead	1	246157144	1:246161494:C:T	0.958984	KIF26B;SMYD3;AHCTF1;SH3BP5L	KIF26B	2b
16		rs28468565	1:246157144:A:G	lead	1	246157144	1:246154535:A:G	0.981328	KIF26B;EFCAB2;SMYD3;COX20;LOC339529;CEP170	KIF26B	3a
16		rs28468565	1:246157144:A:G	lead	1	246157144	1:246154599:C:T	0.981328	KIF26B;EFCAB2;SMYD3;COX20;LOC339529;CEP170	KIF26B	3a
16		rs28468565	1:246157144:A:G	lead	1	246157144	1:246153941:C:T	0.981328	KIF26B;EFCAB2;SMYD3;COX20;LOC339529;CEP170	KIF26B	4
16		rs28468565	1:246157144:A:G	lead	1	246157144	1:246154139:C:T	0.981328	KIF26B;EFCAB2;SMYD3;COX20;LOC339529;CEP170	KIF26B	4
16		rs28468565	1:246157144:A:G	lead	1	246157144	1:246154664:A:G	0.981328	KIF26B;EFCAB2;SMYD3;COX20;LOC339529;CEP170	KIF26B	4
16		rs28468565	1:246157144:A:G	lead	1	246157144	1:246163381:C:T	0.980059	KIF26B;SMYD3;AHCTF1;SH3BP5L	KIF26B	4
16		rs28468565	1:246157144:A:G	lead	1	246157144	1:246164839:D:I	0.971289	KIF26B;SMYD3;AHCTF1;SH3BP5L	KIF26B	4
16		rs28468565	1:246157144:A:G	lead	1	246157144	1:246148910:G:T	0.966356	KIF26B;EFCAB2;SMYD3;COX20;LOC339529;CEP170	KIF26B	5
16		rs28468565	1:246157144:A:G	lead	1	246157144	1:246152864:C:T	0.960987	KIF26B;EFCAB2;SMYD3;COX20;LOC339529;CEP170	KIF26B	5
16		rs28468565	1:246157144:A:G	lead	1	246157144	1:246153034:A:G	0.961725	KIF26B;EFCAB2;SMYD3;COX20;LOC339529;CEP170	KIF26B	5
16		rs28468565	1:246157144:A:G	lead	1	246157144	1:246153048:A:C	0.961725	KIF26B;EFCAB2;SMYD3;COX20;LOC339529;CEP170	KIF26B	5
16		rs28468565	1:246157144:A:G	lead	1	246157144	1:246154336:C:T	0.981328	KIF26B;EFCAB2;SMYD3;COX20;LOC339529;CEP170	KIF26B	5
16		rs28468565	1:246157144:A:G	lead	1	246157144	1:246154427:A:C	0.981328	KIF26B;EFCAB2;SMYD3;COX20;LOC339529;CEP170	KIF26B	5
16		rs28468565	1:246157144:A:G	lead	1	246157144	1:246155107:G:T	0.951477	KIF26B;EFCAB2;SMYD3;COX20;LOC339529;CEP170	KIF26B	5
16		rs28468565	1:246157144:A:G	lead	1	246157144	1:246155112:A:G	0.951477	KIF26B;EFCAB2;SMYD3;COX20;LOC339529;CEP170	KIF26B	5
16		rs28468565	1:246157144:A:G	lead	1	246157144	1:246157628:C:G	0.997101	KIF26B;EFCAB2;SMYD3;COX20;LOC339529;CEP170	KIF26B	5
16		rs28468565	1:246157144:A:G	lead	1	246157144	1:246157698:C:G	0.993496	KIF26B;EFCAB2;SMYD3;COX20;LOC339529;CEP170	KIF26B	5
16		rs28468565	1:246157144:A:G	lead	1	246157144	1:246157722:C:T	0.958008	KIF26B;EFCAB2;SMYD3;COX20;LOC339529;CEP170	KIF26B	5
16		rs28468565	1:246157144:A:G	lead	1	246157144	1:246157723:A:G	0.959348	KIF26B;EFCAB2;SMYD3;COX20;LOC339529;CEP170	KIF26B	5
16		rs28468565	1:246157144:A:G	lead	1	246157144	1:246159654:C:T	0.990614	KIF26B;EFCAB2;SMYD3;COX20;LOC339529;CEP170	KIF26B	5
16		rs28468565	1:246157144:A:G	lead	1	246157144	1:246161101:G:T	0.959675	KIF26B;SMYD3;AHCTF1;SH3BP5L	KIF26B	5
17	LINC01249	rs12616546	2:4824622:A:G	lead	2	4824622	2:4824982:G:T	0.974845	LINC00487;LINC01249;LOC400940;MYT1L	LINC00487	5
17		rs12616546	2:4824622:A:G	lead	2	4824622	2:4824992:C:T	0.972356	LINC00487;LINC01249;LOC400940;MYT1L	LINC00487	5
18	STRN	rs17496249	2:37102249:A:G	lead	2	37102249	2:37117073:C:T	0.861126	HEATR5B;CDKL4;HNRNPLL;VIT;PRKD3	HEATR5B	1d
18		rs17496249	2:37102249:A:G	lead	2	37102249	2:37117502:C:G	0.877844	HEATR5B;CDKL4;HNRNPLL;VIT;PRKD3	HEATR5B	1f
18		rs17496249	2:37102249:A:G	lead	2	37102249	2:37067137:A:G	0.889741	HEATR5B;PRKD3;RMDN2;LOC728730	HEATR5B	5
18		rs17496249	2:37102249:A:G	lead	2	37102249	2:37068428:C:T	0.887082	HEATR5B;PRKD3;RMDN2;LOC728730	HEATR5B	5
18		rs17496249	2:37102249:A:G	lead	2	37102249	2:37081212:D:I	0.908343	HEATR5B;CDKL4;HNRNPLL;VIT;PRKD3	HEATR5B	5
18		rs17496249	2:37102249:A:G	lead	2	37102249	2:37097009:C:T	0.955285	HEATR5B;CDKL4;HNRNPLL;VIT;PRKD3	HEATR5B	5
20	EPAS1	rs11894252	2:46533376:C:T	lead	2	46533376	2:46534338:A:G	0.986041	TMEM247;EPAS1;PIGF;PREPL;PRKCE;MCFD2;FBXO11;PPP1R21;MSH2;RHOQ;SOCS5;STPG4;MIR559	TMEM247	3a
20		rs11894252	2:46533376:C:T	lead	2	46533376	2:46533552:G:T	1	TMEM247;EPAS1;PIGF;PREPL;PRKCE;MCFD2;FBXO11;PPP1R21;MSH2;RHOQ;SOCS5;STPG4;MIR559	TMEM247	4
20		rs11894252	2:46533376:C:T	lead	2	46533376	2:46533376:C:T	1	TMEM247;EPAS1;PIGF;PREPL;PRKCE;MCFD2;FBXO11;PPP1R21;MSH2;RHOQ;SOCS5;STPG4;MIR559	TMEM247	5
20		rs11894252	2:46533376:C:T	lead	2	46533376	2:46537604:A:G	0.976516	TMEM247;EPAS1;PIGF;PREPL;PRKCE;MCFD2;FBXO11;PPP1R21;MSH2;RHOQ;SOCS5;STPG4;MIR559	TMEM247	5
22	SPTBN1	rs4519566	2:54824815:A:G	lead	2	54824815	2:54801591:A:T	0.822451	SPTBN1;RPL23AP32;C2orf73;PSME4;TSPYL6;ACYP2;EML6;ASB3;MTIF2;RPS27A	SPTBN1	1f
22		rs4519566	2:54824815:A:G	lead	2	54824815	2:54801856:A:G	0.814111	SPTBN1;RPL23AP32;C2orf73;PSME4;TSPYL6;ACYP2;EML6;ASB3;MTIF2;RPS27A	SPTBN1	1f
22		rs4519566	2:54824815:A:G	lead	2	54824815	2:54798272:C:T	0.817955	SPTBN1;C2orf73;RPL23AP32;PSME4;TSPYL6;ACYP2;EML6;MTIF2;MIR3682;RTN4	SPTBN1	2b
22		rs4519566	2:54824815:A:G	lead	2	54824815	2:54805409:C:T	0.819195	SPTBN1;RPL23AP32;C2orf73;PSME4;TSPYL6;ACYP2;EML6;ASB3;MTIF2;RPS27A	SPTBN1	2b
22		rs4519566	2:54824815:A:G	lead	2	54824815	2:54805443:G:T	0.819839	SPTBN1;RPL23AP32;C2orf73;PSME4;TSPYL6;ACYP2;EML6;ASB3;MTIF2;RPS27A	SPTBN1	2b
22		rs4519566	2:54824815:A:G	lead	2	54824815	2:54805587:C:T	0.829712	SPTBN1;RPL23AP32;C2orf73;PSME4;TSPYL6;ACYP2;EML6;ASB3;MTIF2;RPS27A	SPTBN1	2b
22		rs4519566	2:54824815:A:G	lead	2	54824815	2:54805607:C:T	0.818741	SPTBN1;RPL23AP32;C2orf73;PSME4;TSPYL6;ACYP2;EML6;ASB3;MTIF2;RPS27A	SPTBN1	2b
22		rs4519566	2:54824815:A:G	lead	2	54824815	2:54813546:A:G	0.975704	SPTBN1;RPL23AP32;C2orf73;PSME4;TSPYL6;ACYP2;EML6;ASB3;MTIF2;RPS27A	SPTBN1	2b
22		rs4519566	2:54824815:A:G	lead	2	54824815	2:54824815:A:G	1	SPTBN1;RPL23AP32;C2orf73;PSME4;TSPYL6;ACYP2;EML6;ASB3;MTIF2;RPS27A	SPTBN1	2b
22		rs4519566	2:54824815:A:G	lead	2	54824815	2:54808191:C:T	0.85531	SPTBN1;RPL23AP32;C2orf73;PSME4;TSPYL6;ACYP2;EML6;ASB3;MTIF2;RPS27A	SPTBN1	3a
22		rs4519566	2:54824815:A:G	lead	2	54824815	2:54788276:C:T	0.892778	SPTBN1;C2orf73;RPL23AP32;PSME4;TSPYL6;ACYP2;EML6;MTIF2;MIR3682;RTN4	SPTBN1	4
22		rs4519566	2:54824815:A:G	lead	2	54824815	2:54789232:C:T	0.909039	SPTBN1;C2orf73;RPL23AP32;PSME4;TSPYL6;ACYP2;EML6;MTIF2;MIR3682;RTN4	SPTBN1	4
22		rs4519566	2:54824815:A:G	lead	2	54824815	2:54795929:A:G	0.895867	SPTBN1;C2orf73;RPL23AP32;PSME4;TSPYL6;ACYP2;EML6;MTIF2;MIR3682;RTN4	SPTBN1	4
22		rs4519566	2:54824815:A:G	lead	2	54824815	2:54797798:C:T	0.889873	SPTBN1;C2orf73;RPL23AP32;PSME4;TSPYL6;ACYP2;EML6;MTIF2;MIR3682;RTN4	SPTBN1	4
22		rs4519566	2:54824815:A:G	lead	2	54824815	2:54800128:G:T	0.816203	SPTBN1;RPL23AP32;C2orf73;PSME4;TSPYL6;ACYP2;EML6;ASB3;MTIF2;RPS27A	SPTBN1	4
22		rs4519566	2:54824815:A:G	lead	2	54824815	2:54802206:C:T	0.820573	SPTBN1;RPL23AP32;C2orf73;PSME4;TSPYL6;ACYP2;EML6;ASB3;MTIF2;RPS27A	SPTBN1	4
22		rs4519566	2:54824815:A:G	lead	2	54824815	2:54802514:C:G	0.808343	SPTBN1;RPL23AP32;C2orf73;PSME4;TSPYL6;ACYP2;EML6;ASB3;MTIF2;RPS27A	SPTBN1	4
22		rs4519566	2:54824815:A:G	lead	2	54824815	2:54805069:D:I	0.816686	SPTBN1;RPL23AP32;C2orf73;PSME4;TSPYL6;ACYP2;EML6;ASB3;MTIF2;RPS27A	SPTBN1	4
22		rs4519566	2:54824815:A:G	lead	2	54824815	2:54806047:A:G	0.811566	SPTBN1;RPL23AP32;C2orf73;PSME4;TSPYL6;ACYP2;EML6;ASB3;MTIF2;RPS27A	SPTBN1	4
22		rs4519566	2:54824815:A:G	lead	2	54824815	2:54806049:A:G	0.811566	SPTBN1;RPL23AP32;C2orf73;PSME4;TSPYL6;ACYP2;EML6;ASB3;MTIF2;RPS27A	SPTBN1	4
22		rs4519566	2:54824815:A:G	lead	2	54824815	2:54806712:A:G	0.972347	SPTBN1;RPL23AP32;C2orf73;PSME4;TSPYL6;ACYP2;EML6;ASB3;MTIF2;RPS27A	SPTBN1	4
22		rs4519566	2:54824815:A:G	lead	2	54824815	2:54823130:D:I	0.994941	SPTBN1;RPL23AP32;C2orf73;PSME4;TSPYL6;ACYP2;EML6;ASB3;MTIF2;RPS27A	SPTBN1	4
22		rs4519566	2:54824815:A:G	lead	2	54824815	2:54801065:D:I	0.820475	SPTBN1;RPL23AP32;C2orf73;PSME4;TSPYL6;ACYP2;EML6;ASB3;MTIF2;RPS27A	SPTBN1	5
22		rs4519566	2:54824815:A:G	lead	2	54824815	2:54801074:A:T	0.820475	SPTBN1;RPL23AP32;C2orf73;PSME4;TSPYL6;ACYP2;EML6;ASB3;MTIF2;RPS27A	SPTBN1	5
22		rs4519566	2:54824815:A:G	lead	2	54824815	2:54803671:A:C	0.816175	SPTBN1;RPL23AP32;C2orf73;PSME4;TSPYL6;ACYP2;EML6;ASB3;MTIF2;RPS27A	SPTBN1	5
22		rs4519566	2:54824815:A:G	lead	2	54824815	2:54805218:A:C	0.81733	SPTBN1;RPL23AP32;C2orf73;PSME4;TSPYL6;ACYP2;EML6;ASB3;MTIF2;RPS27A	SPTBN1	5
22		rs4519566	2:54824815:A:G	lead	2	54824815	2:54805749:A:G	0.819579	SPTBN1;RPL23AP32;C2orf73;PSME4;TSPYL6;ACYP2;EML6;ASB3;MTIF2;RPS27A	SPTBN1	5
22		rs4519566	2:54824815:A:G	lead	2	54824815	2:54805776:A:G	0.819127	SPTBN1;RPL23AP32;C2orf73;PSME4;TSPYL6;ACYP2;EML6;ASB3;MTIF2;RPS27A	SPTBN1	5
22		rs4519566	2:54824815:A:G	lead	2	54824815	2:54805854:C:T	0.820034	SPTBN1;RPL23AP32;C2orf73;PSME4;TSPYL6;ACYP2;EML6;ASB3;MTIF2;RPS27A	SPTBN1	5
22		rs4519566	2:54824815:A:G	lead	2	54824815	2:54818895:C:T	0.873148	SPTBN1;RPL23AP32;C2orf73;PSME4;TSPYL6;ACYP2;EML6;ASB3;MTIF2;RPS27A	SPTBN1	5
22		rs4519566	2:54824815:A:G	lead	2	54824815	2:54824396:A:G	0.997464	SPTBN1;RPL23AP32;C2orf73;PSME4;TSPYL6;ACYP2;EML6;ASB3;MTIF2;RPS27A	SPTBN1	5
23	LINC01812 - C1D	rs7584373	2:68079211:A:G	lead	2	68079211	2:68081340:C:T	0.832878	MIR4778;SPRED2;MEIS1-AS3;ARHGAP25	MIR4778	4
23		rs7584373	2:68079211:A:G	lead	2	68079211	2:68079211:A:G	1	MEIS1-AS3;MIR4778;ETAA1;SPRED2;LINC01829;ACTR2;C1D;LINC02245;CEP68	MIR4778	5
24	FHL2 - LOC285000	rs13006682	2:106104856:C:T	lead	2	106104856	2:106104856:C:T	1	SULT1C3	SULT1C3	4
25	NCKAP5	rs17816356	2:134326085:A:C	lead	2	134326085	2:134326085:A:C	1	LYPD1;C2orf27A	LYPD1	2b
27	LINC01473 - ZC3H15	rs138711926	2:187033804:A:G	lead	2	187033804	2:186819257:A:T	0.831667	FSIP2;FAM171B;COL3A1;CALCRL;DIRC1;ZC3H15	FSIP2	5
28	SDPR	rs58577564	2:192723128:A:T	lead	2	192723128	2:192725908:C:T	0.902862	SLC40A1;MYO1B	SLC40A1	4
29*	BMPR2	rs2103208	2:203373030:A:G	lead	2	203373030	2:203273559:A:G	0.988342	NBEAL1	NBEAL1	2b
29		rs2103208	2:203373030:A:G	lead	2	203373030	2:203377077:A:G	1	NOP58;ICOS;SNORD11;CD28;NBEAL1	NBEAL1	3a
29		rs2103208	2:203373030:A:G	lead	2	203373030	2:203307477:C:T	0.996131	ICA1L;NBEAL1;MPP4;CTLA4;SUMO1;SNORD11;NOP58;ICOS;CDK15;CD28;BMPR2	NBEAL1	4
29		rs2103208	2:203373030:A:G	lead	2	203373030	2:203375701:C:T	1	NOP58;ICOS;SNORD11;CD28;NBEAL1	NBEAL1	4
29		rs2103208	2:203373030:A:G	lead	2	203373030	2:203274963:C:T	0.992229	NBEAL1	NBEAL1	5
29		rs2103208	2:203373030:A:G	lead	2	203373030	2:203297068:G:T	0.996131	ICA1L;NBEAL1;MPP4;CTLA4;SUMO1;SNORD11;NOP58;ICOS;CDK15;CD28;BMPR2	NBEAL1	5
29		rs2103208	2:203373030:A:G	lead	2	203373030	2:203304750:C:G	0.992229	ICA1L;NBEAL1;MPP4;CTLA4;SUMO1;SNORD11;NOP58;ICOS;CDK15;CD28;BMPR2	NBEAL1	5
30*	AC007563.5	rs6435953	2:217628087:C:T	lead	2	217628087	2:217630886:D:I	0.919634	IGFBP5;DIRC3;RUFY4;TNS1;RPL37A;TNP1;CXCR2;CXCR2P1;IGFBP2	IGFBP5	2b
30		rs6435953	2:217628087:C:T	lead	2	217628087	2:217619192:D:I	0.955318	IGFBP5;DIRC3;RUFY4;TNS1;RPL37A;TNP1;CXCR2;CXCR2P1;IGFBP2	IGFBP5	3a
30		rs6435953	2:217628087:C:T	lead	2	217628087	2:217619195:A:T	0.962773	IGFBP5;DIRC3;RUFY4;TNS1;RPL37A;TNP1;CXCR2;CXCR2P1;IGFBP2	IGFBP5	4
30		rs6435953	2:217628087:C:T	lead	2	217628087	2:217619253:C:T	0.962773	IGFBP5;DIRC3;RUFY4;TNS1;RPL37A;TNP1;CXCR2;CXCR2P1;IGFBP2	IGFBP5	4
30		rs6435953	2:217628087:C:T	lead	2	217628087	2:217631840:C:T	0.891514	IGFBP5;DIRC3;RUFY4;TNS1;RPL37A;TNP1;CXCR2;CXCR2P1;IGFBP2	IGFBP5	4
30		rs6435953	2:217628087:C:T	lead	2	217628087	2:217616804:C:T	0.947948	IGFBP5;DIRC3;RUFY4;TNS1;RPL37A;TNP1;CXCR2;CXCR2P1;IGFBP2	IGFBP5	5
30		rs6435953	2:217628087:C:T	lead	2	217628087	2:217618897:C:G	0.955318	IGFBP5;DIRC3;RUFY4;TNS1;RPL37A;TNP1;CXCR2;CXCR2P1;IGFBP2	IGFBP5	5
30		rs6435953	2:217628087:C:T	lead	2	217628087	2:217619036:C:T	0.955318	IGFBP5;DIRC3;RUFY4;TNS1;RPL37A;TNP1;CXCR2;CXCR2P1;IGFBP2	IGFBP5	5
30		rs6435953	2:217628087:C:T	lead	2	217628087	2:217619060:A:C	0.962773	IGFBP5;DIRC3;RUFY4;TNS1;RPL37A;TNP1;CXCR2;CXCR2P1;IGFBP2	IGFBP5	5
30		rs6435953	2:217628087:C:T	lead	2	217628087	2:217619858:D:I	0.970315	IGFBP5;DIRC3;RUFY4;TNS1;RPL37A;TNP1;CXCR2;CXCR2P1;IGFBP2	IGFBP5	5
30		rs6435953	2:217628087:C:T	lead	2	217628087	2:217631338:C:T	0.919634	IGFBP5;DIRC3;RUFY4;TNS1;RPL37A;TNP1;CXCR2;CXCR2P1;IGFBP2	IGFBP5	5
30		rs6435953	2:217628087:C:T	lead	2	217628087	2:217632085:A:G	0.869803	IGFBP5;DIRC3;RUFY4;TNS1;RPL37A;TNP1;CXCR2;CXCR2P1;IGFBP2	IGFBP5	5
32	LSM3	rs6442433	3:14275759:C:G	lead	3	14275759	3:14276494:A:G	0.989168	GRIP2;WNT7A;C3orf20	GRIP2	2b
32		rs6442433	3:14275759:C:G	lead	3	14275759	3:14273414:C:G	0.827418	GRIP2;WNT7A;C3orf20	GRIP2	4
32		rs6442433	3:14275759:C:G	lead	3	14275759	3:14273464:C:T	0.990716	GRIP2;WNT7A;C3orf20	GRIP2	4
32		rs6442433	3:14275759:C:G	lead	3	14275759	3:14273472:C:T	0.990716	GRIP2;WNT7A;C3orf20	GRIP2	4
32		rs6442433	3:14275759:C:G	lead	3	14275759	3:14274293:C:T	0.894373	GRIP2;WNT7A;C3orf20	GRIP2	4
32		rs6442433	3:14275759:C:G	lead	3	14275759	3:14275759:C:G	1	GRIP2;WNT7A;C3orf20	GRIP2	4
32		rs6442433	3:14275759:C:G	lead	3	14275759	3:14276982:A:G	0.990716	GRIP2;WNT7A;C3orf20	GRIP2	4
33	THRB	rs60325252	3:24465080:C:T	lead	3	24465080	3:24465080:C:T	1	MIR4792;THRB;LRRC3B;LINC00691;TOP2B;ZNF385D;RPL15	MIR4792	5
33		rs60325252	3:24465080:C:T	lead	3	24465080	3:24463235:C:T	0.968778	MIR4792;THRB;LRRC3B;LINC00691;TOP2B;ZNF385D;RPL15	MIR4792	5
33		rs60325252	3:24465080:C:T	lead	3	24465080	3:24464955:A:G	0.963106	MIR4792;THRB;LRRC3B;LINC00691;TOP2B;ZNF385D;RPL15	MIR4792	5
33		rs60325252	3:24465080:C:T	lead	3	24465080	3:24475162:C:T	0.943135	MIR4792;THRB;LRRC3B;LINC00691;TOP2B;ZNF385D;RPL15	MIR4792	5
33		rs60325252	3:24465080:C:T	lead	3	24465080	3:24475505:D:I	0.967703	MIR4792;THRB;LRRC3B;LINC00691;TOP2B;ZNF385D;RPL15	MIR4792	5
34	TRAK1	rs11921457	3:42103045:G:T	lead	3	42103045	3:42103045:G:T	1	CTNNB1;TRAK1;EIF1B;ZNF619;ZNF621;ENTPD3-AS1;TCAIM;XIRP1	CTNNB1	5
35	LAMB2	rs9865051	3:49166069:C:T	lead	3	49166069	3:49054692:C:T	0.888907	CCDC51	ZNF589;CCDC51	1b
35		rs9865051	3:49166069:C:T	lead	3	49166069	3:49166069:C:T	1	CCDC51	ZNF589;CCDC51	1f
35		rs9865051	3:49166069:C:T	lead	3	49166069	3:48837182:C:T	0.901453	ZNF589;PFKFB4;KLHL18;CCDC51;RBM5;MIR4787;GNAI2	ZNF589;CCDC51	1f
35		rs9865051	3:49166069:C:T	lead	3	49166069	3:49070499:C:T	0.9135	CCDC51	ZNF589;CCDC51	1f
35		rs9865051	3:49166069:C:T	lead	3	49166069	3:49508976:C:T	0.832815	-	ZNF589;CCDC51	2b
35		rs9865051	3:49166069:C:T	lead	3	49166069	3:49093377:A:G	0.91556	NCKIPSD;QRICH1;GMPPB;MIR4271;PFKFB4;SMARCC1;SETD2;CCDC51;IQCF2;RHOA	ZNF589;CCDC51	3a
35		rs9865051	3:49166069:C:T	lead	3	49166069	3:49053219:A:G	0.888832	CCDC51	ZNF589;CCDC51	4
35		rs9865051	3:49166069:C:T	lead	3	49166069	3:49425167:A:G	0.836905	-	ZNF589;CCDC51	4
35		rs9865051	3:49166069:C:T	lead	3	49166069	3:48838364:C:T	0.905734	ZNF589;PFKFB4;KLHL18;CCDC51;RBM5;MIR4787;GNAI2	ZNF589;CCDC51	5
35		rs9865051	3:49166069:C:T	lead	3	49166069	3:49088127:D:I	0.881249	NCKIPSD;QRICH1;GMPPB;MIR4271;PFKFB4;SMARCC1;SETD2;CCDC51;IQCF2;RHOA	ZNF589;CCDC51	5
35		rs9865051	3:49166069:C:T	lead	3	49166069	3:49448423:A:G	0.835919	QRICH1;CCDC51	ZNF589;CCDC51	5
35		rs9865051	3:49166069:C:T	lead	3	49166069	3:49510931:A:G	0.820046	-	ZNF589;CCDC51	5
36	ADCY5	rs1000368	3:123117165:C:T	lead	3	123117165	3:123117165:C:T	1	ADCY5	ADCY5;LINC02035	5
36		rs1000368	3:123117165:C:T	lead	3	123117165	3:123121286:A:G	0.926863	LINC02035;GOLGB1	ADCY5;LINC02035	5
36		rs1000368	3:123117165:C:T	lead	3	123117165	3:123122637:A:T	0.917823	LINC02035;GOLGB1	ADCY5;LINC02035	5
36		rs1000368	3:123117165:C:T	lead	3	123117165	3:123124824:C:G	0.925762	LINC02035;GOLGB1	ADCY5;LINC02035	5
36		rs1000368	3:123117165:C:T	lead	3	123117165	3:123125779:A:G	0.913866	LINC02035;GOLGB1	ADCY5;LINC02035	5
36		rs1000368	3:123117165:C:T	lead	3	123117165	3:123126268:C:T	0.940157	LINC02035;GOLGB1	ADCY5;LINC02035	5
37	TSC22D2	rs201481721	3:150176904:D:I	lead	3	150176904	3:150202023:C:T	0.841109	TSC22D2;MBNL1;PFN2;AADACP1;RNF13	TSC22D2	5
38	RAP2B	rs4680046	3:153000092:C:T	lead	3	153000092	3:152992193:D:I	0.854308	RAP2B;AADACP1;C3orf79;EIF2A;ARHGEF26;CLRN1-AS1;SUCNR1;MME;KCNAB1	RAP2B	3a
38		rs4680046	3:153000092:C:T	lead	3	153000092	3:152999507:A:T	0.861258	RAP2B;AADACP1;C3orf79;EIF2A;ARHGEF26;CLRN1-AS1;SUCNR1;MME;KCNAB1	RAP2B	3b
38		rs4680046	3:153000092:C:T	lead	3	153000092	3:152986534:C:G	0.823806	RAP2B;AADACP1;C3orf79;EIF2A;ARHGEF26;CLRN1-AS1;SUCNR1;MME;KCNAB1	RAP2B	5
38		rs4680046	3:153000092:C:T	lead	3	153000092	3:152986756:D:I	0.820402	RAP2B;AADACP1;C3orf79;EIF2A;ARHGEF26;CLRN1-AS1;SUCNR1;MME;KCNAB1	RAP2B	5
38		rs4680046	3:153000092:C:T	lead	3	153000092	3:152986817:A:C	0.863005	RAP2B;AADACP1;C3orf79;EIF2A;ARHGEF26;CLRN1-AS1;SUCNR1;MME;KCNAB1	RAP2B	5
38		rs4680046	3:153000092:C:T	lead	3	153000092	3:152987467:A:C	0.820676	RAP2B;AADACP1;C3orf79;EIF2A;ARHGEF26;CLRN1-AS1;SUCNR1;MME;KCNAB1	RAP2B	5
38		rs4680046	3:153000092:C:T	lead	3	153000092	3:152989224:A:G	0.822852	RAP2B;AADACP1;C3orf79;EIF2A;ARHGEF26;CLRN1-AS1;SUCNR1;MME;KCNAB1	RAP2B	5
38		rs4680046	3:153000092:C:T	lead	3	153000092	3:152992240:C:T	0.854436	RAP2B;AADACP1;C3orf79;EIF2A;ARHGEF26;CLRN1-AS1;SUCNR1;MME;KCNAB1	RAP2B	5
38		rs4680046	3:153000092:C:T	lead	3	153000092	3:152992359:A:T	0.854995	RAP2B;AADACP1;C3orf79;EIF2A;ARHGEF26;CLRN1-AS1;SUCNR1;MME;KCNAB1	RAP2B	5
38		rs4680046	3:153000092:C:T	lead	3	153000092	3:152996756:C:T	0.857227	RAP2B;AADACP1;C3orf79;EIF2A;ARHGEF26;CLRN1-AS1;SUCNR1;MME;KCNAB1	RAP2B	5
38		rs4680046	3:153000092:C:T	lead	3	153000092	3:152997569:G:T	0.859989	RAP2B;AADACP1;C3orf79;EIF2A;ARHGEF26;CLRN1-AS1;SUCNR1;MME;KCNAB1	RAP2B	5
38		rs4680046	3:153000092:C:T	lead	3	153000092	3:152997756:A:G	0.859989	RAP2B;AADACP1;C3orf79;EIF2A;ARHGEF26;CLRN1-AS1;SUCNR1;MME;KCNAB1	RAP2B	5
38		rs4680046	3:153000092:C:T	lead	3	153000092	3:152997867:A:C	0.984886	RAP2B;AADACP1;C3orf79;EIF2A;ARHGEF26;CLRN1-AS1;SUCNR1;MME;KCNAB1	RAP2B	5
38		rs4680046	3:153000092:C:T	lead	3	153000092	3:152998712:G:T	0.859158	RAP2B;AADACP1;C3orf79;EIF2A;ARHGEF26;CLRN1-AS1;SUCNR1;MME;KCNAB1	RAP2B	5
38		rs4680046	3:153000092:C:T	lead	3	153000092	3:153000787:C:T	0.859011	ARHGEF26;SERP1;C3orf79;AADACP1;RAP2B;MBNL1;MIR548H2;IGSF10;DHX36;SIAH2	RAP2B	5
39*	MLF1	rs6799180	3:158333891:A:G	lead	3	158333891	3:158350118:C:T	0.991918	PQLC2L;IFT80;B3GALNT1;TIPARP;CCNL1;C3orf33;MLF1;KCNAB1	PQLC2L;MFSD1	1f
39		rs6799180	3:158333891:A:G	lead	3	158333891	3:158382093:A:G	1	MFSD1;IQCJ-SCHIP1;MLF1;SCHIP1;SCARNA7;B3GALNT1;OTOL1;TIPARP;KCNAB1-AS2;IL12A;ARL14;PLCH1	PQLC2L;MFSD1	1f
39		rs6799180	3:158333891:A:G	lead	3	158333891	3:158406915:A:G	1	MFSD1;SCARNA7;PQLC2L;KCNAB1;SCHIP1;LINC00881;MIR15B;IFT80;SHOX2;C3orf80;NMD3;SSR3;GFM1	PQLC2L;MFSD1	1f
39		rs6799180	3:158333891:A:G	lead	3	158333891	3:158336068:D:I	1	PQLC2L;IFT80;B3GALNT1;TIPARP;CCNL1;C3orf33;MLF1;KCNAB1	PQLC2L;MFSD1	3a
39		rs6799180	3:158333891:A:G	lead	3	158333891	3:158288810:C:G	0.894896	CCNL1;TIPARP;GFM1;SCHIP1;MIR15B;LINC00881;PQLC2L;PLCH1;IFT80;KPNA4;KCNAB1;C3orf33;IQCJ-SCHIP1	PQLC2L;MFSD1	4
39		rs6799180	3:158333891:A:G	lead	3	158333891	3:158290352:C:T	0.898123	CCNL1;TIPARP;GFM1;SCHIP1;MIR15B;LINC00881;PQLC2L;PLCH1;IFT80;KPNA4;KCNAB1;C3orf33;IQCJ-SCHIP1	PQLC2L;MFSD1	4
39		rs6799180	3:158333891:A:G	lead	3	158333891	3:158290565:A:G	0.898123	CCNL1;TIPARP;GFM1;SCHIP1;MIR15B;LINC00881;PQLC2L;PLCH1;IFT80;KPNA4;KCNAB1;C3orf33;IQCJ-SCHIP1	PQLC2L;MFSD1	4
39		rs6799180	3:158333891:A:G	lead	3	158333891	3:158290607:G:T	0.898123	CCNL1;TIPARP;GFM1;SCHIP1;MIR15B;LINC00881;PQLC2L;PLCH1;IFT80;KPNA4;KCNAB1;C3orf33;IQCJ-SCHIP1	PQLC2L;MFSD1	4
39		rs6799180	3:158333891:A:G	lead	3	158333891	3:158290717:C:T	0.898123	CCNL1;TIPARP;GFM1;SCHIP1;MIR15B;LINC00881;PQLC2L;PLCH1;IFT80;KPNA4;KCNAB1;C3orf33;IQCJ-SCHIP1	PQLC2L;MFSD1	4
39		rs6799180	3:158333891:A:G	lead	3	158333891	3:158362441:C:T	1	MFSD1;IQCJ-SCHIP1;MLF1;SCHIP1;SCARNA7;B3GALNT1;OTOL1;TIPARP;KCNAB1-AS2;IL12A;ARL14;PLCH1	PQLC2L;MFSD1	4
39		rs6799180	3:158333891:A:G	lead	3	158333891	3:158377554:G:T	1	MFSD1;IQCJ-SCHIP1;MLF1;SCHIP1;SCARNA7;B3GALNT1;OTOL1;TIPARP;KCNAB1-AS2;IL12A;ARL14;PLCH1	PQLC2L;MFSD1	4
39		rs6799180	3:158333891:A:G	lead	3	158333891	3:158377797:C:G	1	MFSD1;IQCJ-SCHIP1;MLF1;SCHIP1;SCARNA7;B3GALNT1;OTOL1;TIPARP;KCNAB1-AS2;IL12A;ARL14;PLCH1	PQLC2L;MFSD1	4
39		rs6799180	3:158333891:A:G	lead	3	158333891	3:158394013:A:G	1	MFSD1;IQCJ-SCHIP1;MLF1;SCHIP1;SCARNA7;B3GALNT1;OTOL1;TIPARP;KCNAB1-AS2;IL12A;ARL14;PLCH1	PQLC2L;MFSD1	4
39		rs6799180	3:158333891:A:G	lead	3	158333891	3:158291055:G:T	0.898123	CCNL1;TIPARP;GFM1;SCHIP1;MIR15B;LINC00881;PQLC2L;PLCH1;IFT80;KPNA4;KCNAB1;C3orf33;IQCJ-SCHIP1	PQLC2L;MFSD1	5
39		rs6799180	3:158333891:A:G	lead	3	158333891	3:158307511:C:T	0.898123	CCNL1;TIPARP;GFM1;SCHIP1;MIR15B;LINC00881;PQLC2L;PLCH1;IFT80;KPNA4;KCNAB1;C3orf33;IQCJ-SCHIP1	PQLC2L;MFSD1	5
39		rs6799180	3:158333891:A:G	lead	3	158333891	3:158307512:A:G	0.898123	CCNL1;TIPARP;GFM1;SCHIP1;MIR15B;LINC00881;PQLC2L;PLCH1;IFT80;KPNA4;KCNAB1;C3orf33;IQCJ-SCHIP1	PQLC2L;MFSD1	5
39		rs6799180	3:158333891:A:G	lead	3	158333891	3:158310153:A:G	0.898123	CCNL1;TIPARP;GFM1;SCHIP1;MIR15B;LINC00881;PQLC2L;PLCH1;IFT80;KPNA4;KCNAB1;C3orf33;IQCJ-SCHIP1	PQLC2L;MFSD1	5
39		rs6799180	3:158333891:A:G	lead	3	158333891	3:158313583:C:T	0.893681	CCNL1;TIPARP;GFM1;SCHIP1;MIR15B;LINC00881;PQLC2L;PLCH1;IFT80;KPNA4;KCNAB1;C3orf33;IQCJ-SCHIP1	PQLC2L;MFSD1	5
39		rs6799180	3:158333891:A:G	lead	3	158333891	3:158316650:A:G	0.976015	CCNL1;TIPARP;GFM1;SCHIP1;MIR15B;LINC00881;PQLC2L;PLCH1;IFT80;KPNA4;KCNAB1;C3orf33;IQCJ-SCHIP1	PQLC2L;MFSD1	5
39		rs6799180	3:158333891:A:G	lead	3	158333891	3:158335738:A:G	1	PQLC2L;IFT80;B3GALNT1;TIPARP;CCNL1;C3orf33;MLF1;KCNAB1	PQLC2L;MFSD1	5
39		rs6799180	3:158333891:A:G	lead	3	158333891	3:158336158:D:I	1	PQLC2L;IFT80;B3GALNT1;TIPARP;CCNL1;C3orf33;MLF1;KCNAB1	PQLC2L;MFSD1	5
39		rs6799180	3:158333891:A:G	lead	3	158333891	3:158336399:A:G	1	PQLC2L;IFT80;B3GALNT1;TIPARP;CCNL1;C3orf33;MLF1;KCNAB1	PQLC2L;MFSD1	5
39		rs6799180	3:158333891:A:G	lead	3	158333891	3:158336517:A:G	1	PQLC2L;IFT80;B3GALNT1;TIPARP;CCNL1;C3orf33;MLF1;KCNAB1	PQLC2L;MFSD1	5
39		rs6799180	3:158333891:A:G	lead	3	158333891	3:158365719:C:T	1	MFSD1;IQCJ-SCHIP1;MLF1;SCHIP1;SCARNA7;B3GALNT1;OTOL1;TIPARP;KCNAB1-AS2;IL12A;ARL14;PLCH1	PQLC2L;MFSD1	5
39		rs6799180	3:158333891:A:G	lead	3	158333891	3:158422506:A:G	1	MFSD1;SCARNA7;PQLC2L;KCNAB1;SCHIP1;LINC00881;MIR15B;IFT80;SHOX2;C3orf80;NMD3;SSR3;GFM1	PQLC2L;MFSD1	5
40	FNDC3B	rs4894803	3:171800256:A:G	lead	3	171800256	3:171785168:C:G	0.82157	FNDC3B;PLD1;TMEM212;TNIK;GHSR;TERC;SLC2A2;LOC100128164;NCEH1;PRKCI;CLDN11	FNDC3B	3a
40		rs4894803	3:171800256:A:G	lead	3	171800256	3:171800256:A:G	1	FNDC3B;PLD1;SLC2A2;NCEH1;SKIL	FNDC3B	4
40		rs4894803	3:171800256:A:G	lead	3	171800256	3:171774601:C:G	0.806009	FNDC3B;PLD1;TMEM212;TNIK;GHSR;TERC;SLC2A2;LOC100128164;NCEH1;PRKCI;CLDN11	FNDC3B	5
41	FGF12	rs4687352	3:192373761:A:C	lead	3	192373761	3:192359938:C:T	0.97198	FGF12;ATP13A4;OPA1;APOD;OPA1-AS1;TP63;LINC00884;HRASLS;CLDN1;MGC2889;OSTN;IL1RAP;P3H2	FGF12	3a
41		rs4687352	3:192373761:A:C	lead	3	192373761	3:192363339:C:T	0.986728	FGF12;OPA1;MGC2889;ATP13A4;ATP13A5;CLDN1;CCDC50;ATP13A3;TP63	FGF12	3a
41		rs4687352	3:192373761:A:C	lead	3	192373761	3:192370648:G:T	0.956787	FGF12;OPA1;MGC2889;ATP13A4;ATP13A5;CLDN1;CCDC50;ATP13A3;TP63	FGF12	3a
41		rs4687352	3:192373761:A:C	lead	3	192373761	3:192359833:C:G	0.869163	FGF12;ATP13A4;OPA1;APOD;OPA1-AS1;TP63;LINC00884;HRASLS;CLDN1;MGC2889;OSTN;IL1RAP;P3H2	FGF12	4
41		rs4687352	3:192373761:A:C	lead	3	192373761	3:192363417:A:G	0.955304	FGF12;OPA1;MGC2889;ATP13A4;ATP13A5;CLDN1;CCDC50;ATP13A3;TP63	FGF12	4
41		rs4687352	3:192373761:A:C	lead	3	192373761	3:192370738:A:T	0.988285	FGF12;OPA1;MGC2889;ATP13A4;ATP13A5;CLDN1;CCDC50;ATP13A3;TP63	FGF12	4
41		rs4687352	3:192373761:A:C	lead	3	192373761	3:192370870:C:T	0.988285	FGF12;OPA1;MGC2889;ATP13A4;ATP13A5;CLDN1;CCDC50;ATP13A3;TP63	FGF12	4
41		rs4687352	3:192373761:A:C	lead	3	192373761	3:192373660:A:G	0.973038	FGF12;OPA1;MGC2889;ATP13A4;ATP13A5;CLDN1;CCDC50;ATP13A3;TP63	FGF12	4
41		rs4687352	3:192373761:A:C	lead	3	192373761	3:192373666:A:G	0.973038	FGF12;OPA1;MGC2889;ATP13A4;ATP13A5;CLDN1;CCDC50;ATP13A3;TP63	FGF12	4
41		rs4687352	3:192373761:A:C	lead	3	192373761	3:192373671:C:T	0.94125	FGF12;OPA1;MGC2889;ATP13A4;ATP13A5;CLDN1;CCDC50;ATP13A3;TP63	FGF12	4
41		rs4687352	3:192373761:A:C	lead	3	192373761	3:192373673:C:T	0.973038	FGF12;OPA1;MGC2889;ATP13A4;ATP13A5;CLDN1;CCDC50;ATP13A3;TP63	FGF12	4
41		rs4687352	3:192373761:A:C	lead	3	192373761	3:192373761:A:C	1	FGF12;OPA1;MGC2889;ATP13A4;ATP13A5;CLDN1;CCDC50;ATP13A3;TP63	FGF12	5
41		rs4687352	3:192373761:A:C	lead	3	192373761	3:192360059:A:G	0.944807	FGF12;OPA1;MGC2889;ATP13A4;ATP13A5;CLDN1;CCDC50;ATP13A3;TP63	FGF12	5
41		rs4687352	3:192373761:A:C	lead	3	192373761	3:192360122:A:G	0.968903	FGF12;OPA1;MGC2889;ATP13A4;ATP13A5;CLDN1;CCDC50;ATP13A3;TP63	FGF12	5
41		rs4687352	3:192373761:A:C	lead	3	192373761	3:192363650:A:G	0.955304	FGF12;OPA1;MGC2889;ATP13A4;ATP13A5;CLDN1;CCDC50;ATP13A3;TP63	FGF12	5
41		rs4687352	3:192373761:A:C	lead	3	192373761	3:192363686:C:T	0.953703	FGF12;OPA1;MGC2889;ATP13A4;ATP13A5;CLDN1;CCDC50;ATP13A3;TP63	FGF12	5
41		rs4687352	3:192373761:A:C	lead	3	192373761	3:192366059:C:G	0.904059	FGF12;OPA1;MGC2889;ATP13A4;ATP13A5;CLDN1;CCDC50;ATP13A3;TP63	FGF12	5
41		rs4687352	3:192373761:A:C	lead	3	192373761	3:192370033:A:G	0.986727	FGF12;OPA1;MGC2889;ATP13A4;ATP13A5;CLDN1;CCDC50;ATP13A3;TP63	FGF12	5
41		rs4687352	3:192373761:A:C	lead	3	192373761	3:192370065:A:C	0.906251	FGF12;OPA1;MGC2889;ATP13A4;ATP13A5;CLDN1;CCDC50;ATP13A3;TP63	FGF12	5
41		rs4687352	3:192373761:A:C	lead	3	192373761	3:192371185:C:T	0.987501	FGF12;OPA1;MGC2889;ATP13A4;ATP13A5;CLDN1;CCDC50;ATP13A3;TP63	FGF12	5
41		rs4687352	3:192373761:A:C	lead	3	192373761	3:192371328:C:T	0.988285	FGF12;OPA1;MGC2889;ATP13A4;ATP13A5;CLDN1;CCDC50;ATP13A3;TP63	FGF12	5
41		rs4687352	3:192373761:A:C	lead	3	192373761	3:192372110:A:G	0.906401	FGF12;OPA1;MGC2889;ATP13A4;ATP13A5;CLDN1;CCDC50;ATP13A3;TP63	FGF12	5
41		rs4687352	3:192373761:A:C	lead	3	192373761	3:192372585:A:G	0.957531	FGF12;OPA1;MGC2889;ATP13A4;ATP13A5;CLDN1;CCDC50;ATP13A3;TP63	FGF12	5
41		rs4687352	3:192373761:A:C	lead	3	192373761	3:192374368:C:G	0.983659	FGF12;OPA1;MGC2889;ATP13A4;ATP13A5;CLDN1;CCDC50;ATP13A3;TP63	FGF12	5
41		rs4687352	3:192373761:A:C	lead	3	192373761	3:192374485:A:T	0.954391	FGF12;OPA1;MGC2889;ATP13A4;ATP13A5;CLDN1;CCDC50;ATP13A3;TP63	FGF12	5
41		rs4687352	3:192373761:A:C	lead	3	192373761	3:192375209:D:I	0.867815	FGF12;OPA1;MGC2889;ATP13A4;ATP13A5;CLDN1;CCDC50;ATP13A3;TP63	FGF12	5
41		rs4687352	3:192373761:A:C	lead	3	192373761	3:192376137:C:T	0.8445	FGF12;OPA1;MGC2889;ATP13A4;ATP13A5;CLDN1;CCDC50;ATP13A3;TP63	FGF12	5
41		rs4687352	3:192373761:A:C	lead	3	192373761	3:192376139:A:C	0.953613	FGF12;OPA1;MGC2889;ATP13A4;ATP13A5;CLDN1;CCDC50;ATP13A3;TP63	FGF12	5
42	DLG1	rs143879787	3:196799232:D:I	lead	3	196799232	3:196799232:D:I	1	BDH1;PCYT1A	BDH1;TCTEX1D2	5
42		rs143879787	3:196799232:D:I	lead	3	196799232	3:196939883:C:T	0.971247	BDH1;MUC20;WDR53	BDH1;TCTEX1D2	5
42		rs143879787	3:196799232:D:I	lead	3	196799232	3:197011680:A:G	0.962812	TCTEX1D2;LRCH3;WDR53;TNK2	BDH1;TCTEX1D2	5
43	SRD5A3	rs77422711	4:56123105:A:G	lead	4	56123105	4:56123105:A:G	1	KDR;LNX1;KIT;PDGFRA;CLOCK;EXOC1;DANCR;SRP72	KDR	5
43		rs77422711	4:56123105:A:G	lead	4	56123105	4:56136027:G:T	0.896745	KDR;LNX1;KIT;PDGFRA;CLOCK;EXOC1;DANCR;SRP72	KDR	5
44	LPHN3	rs28540500	4:62409801:C:G	lead	4	62409801	4:62409950:C:G	0.997298	ADGRL3	ADGRL3	3a
44		rs28540500	4:62409801:C:G	lead	4	62409801	4:62409801:C:G	1	ADGRL3	ADGRL3	4
46	PDLIM5	rs2172448	4:95506214:A:G	lead	4	95506214	4:95500223:C:T	0.976854	PDLIM5;HPGDS;BMPR1B	PDLIM5	5
46		rs2172448	4:95506214:A:G	lead	4	95506214	4:95509763:A:G	0.935608	PDLIM5;HPGDS;BMPR1B	PDLIM5	5
46		rs2172448	4:95506214:A:G	lead	4	95506214	4:95510638:A:G	0.917575	PDLIM5;HPGDS;BMPR1B	PDLIM5	5
47*	MYOZ2	rs78277783	4:120070079:A:T	lead	4	120070079	4:120062451:A:G	0.970439	SEC24D;USP53;SYNPO2;QRFPR;PRDM5;ANXA5;EXOSC9;METTL14;C4orf3;NDNF	SEC24D;MYOZ2	5
47		rs78277783	4:120070079:A:T	lead	4	120070079	4:120068633:C:T	1	SEC24D;USP53;SYNPO2;QRFPR;PRDM5;ANXA5;EXOSC9;METTL14;C4orf3;NDNF	SEC24D;MYOZ2	5
47		rs78277783	4:120070079:A:T	lead	4	120070079	4:120069488:G:T	1	SEC24D;USP53;SYNPO2;QRFPR;PRDM5;ANXA5;EXOSC9;METTL14;C4orf3;NDNF	SEC24D;MYOZ2	5
47		rs78277783	4:120070079:A:T	lead	4	120070079	4:120094880:C:T	0.990117	MYOZ2;SEC24D;SYNPO2;USP53;NDNF;METTL14;PRDM5	SEC24D;MYOZ2	5
47		rs78277783	4:120070079:A:T	lead	4	120070079	4:120095288:A:G	0.990117	MYOZ2;SEC24D;SYNPO2;USP53;NDNF;METTL14;PRDM5	SEC24D;MYOZ2	5
49	SUB1	rs17441816	5:32629419:A:G	lead	5	32629419	5:32627752:A:G	0.995957	SLC45A2;ZFR	SLC45A2	2b
49		rs17441816	5:32629419:A:G	lead	5	32629419	5:32627910:A:G	0.993276	SLC45A2;ZFR	SLC45A2	2b
49		rs17441816	5:32629419:A:G	lead	5	32629419	5:32627541:C:G	0.995957	SLC45A2;ZFR	SLC45A2	4
49		rs17441816	5:32629419:A:G	lead	5	32629419	5:32628441:C:T	0.983843	SLC45A2;ZFR	SLC45A2	4
49		rs17441816	5:32629419:A:G	lead	5	32629419	5:32629204:A:G	0.985201	SLC45A2;ZFR	SLC45A2	5
49		rs17441816	5:32629419:A:G	lead	5	32629419	5:32631856:C:T	0.868408	SLC45A2;ZFR	SLC45A2	5
49		rs1173743	5:32775047:G:T	conditional	5	32775047	5:32804528:C:T	0.825764	TTC23L;CDH6;ADAMTS12;SLC45A2;RXFP3;PRLR	TTC23L	5
50	HCN1	rs10039283	5:45864843:A:G	lead	5	45864843	5:45534423:C:G	0.843279	PAIP1	PAIP1	4
50		rs10039283	5:45864843:A:G	lead	5	45864843	5:45403735:C:T	0.80941	MRPS30	PAIP1	5
50		rs10039283	5:45864843:A:G	lead	5	45864843	5:45427173:C:T	0.804168	MRPS30	PAIP1	5
50		rs10039283	5:45864843:A:G	lead	5	45864843	5:45561903:A:G	0.884269	MRPS30;PAIP1	PAIP1	5
50		rs10039283	5:45864843:A:G	lead	5	45864843	5:45622496:A:C	0.850794	PAIP1	PAIP1	5
50		rs10039283	5:45864843:A:G	lead	5	45864843	5:45712185:D:I	0.804393	MRPS30	PAIP1	5
50		rs10039283	5:45864843:A:G	lead	5	45864843	5:45725597:C:T	0.809357	MRPS30;PAIP1	PAIP1	5
50		rs10039283	5:45864843:A:G	lead	5	45864843	5:45748871:D:I	0.822062	MRPS30;PAIP1	PAIP1	5
50		rs10039283	5:45864843:A:G	lead	5	45864843	5:45893362:C:T	0.949616	MRPS30	PAIP1	5
50		rs10039283	5:45864843:A:G	lead	5	45864843	5:45893456:A:G	0.992783	MRPS30	PAIP1	5
50		rs10039283	5:45864843:A:G	lead	5	45864843	5:45900317:A:G	0.989915	MRPS30	PAIP1	5
50		rs10039283	5:45864843:A:G	lead	5	45864843	5:45945301:A:G	0.938136	HCN1;PAIP1;FGF10	PAIP1	5
50		rs10039283	5:45864843:A:G	lead	5	45864843	5:45945880:C:T	0.987743	HCN1;PAIP1;FGF10	PAIP1	5
50		rs10039283	5:45864843:A:G	lead	5	45864843	5:46078122:A:T	0.888521	HCN1;MRPS30;ANXA2R	PAIP1	5
50		rs10039283	5:45864843:A:G	lead	5	45864843	5:46078410:C:T	0.886631	HCN1;MRPS30;ANXA2R	PAIP1	5
50		rs10039283	5:45864843:A:G	lead	5	45864843	5:46097487:A:G	0.855462	PAIP1;HMGCS1	PAIP1	5
50		rs10039283	5:45864843:A:G	lead	5	45864843	5:46125490:A:T	0.898585	HCN1;MRPS30;PAIP1	PAIP1	5
50		rs10039283	5:45864843:A:G	lead	5	45864843	5:46125600:A:G	0.828321	HCN1;MRPS30;PAIP1	PAIP1	5
50		rs10039283	5:45864843:A:G	lead	5	45864843	5:46194080:D:I	0.817095	FGF10;MRPS30	PAIP1	5
50		rs10039283	5:45864843:A:G	lead	5	45864843	5:46215658:G:T	0.815711	HCN1;MRPS30;FGF10;PAIP1	PAIP1	5
50		rs10039283	5:45864843:A:G	lead	5	45864843	5:46325385:A:C	0.822553	FGF10;PAIP1	PAIP1	5
50		rs10039283	5:45864843:A:G	lead	5	45864843	5:46340344:C:G	0.89486	FGF10;PAIP1	PAIP1	5
51	NR2F1	rs4869412	5:92455655:A:G	lead	5	92455655	5:92450649:A:G	0.991357	NR2F1-AS1;MCTP1;KIAA0825;ADGRV1	NR2F1-AS1;ADGRV1	5
51		rs4869412	5:92455655:A:G	lead	5	92455655	5:92461247:A:T	0.992154	NR2F1-AS1;MCTP1;KIAA0825;ADGRV1	NR2F1-AS1;ADGRV1	5
51		rs4869412	5:92455655:A:G	lead	5	92455655	5:92488009:A:G	0.897134	ADGRV1;NR2F1-AS1;KIAA0825;CETN3;ARRDC3-AS1;FAM172A	NR2F1-AS1;ADGRV1	5
51		rs4869412	5:92455655:A:G	lead	5	92455655	5:92488062:A:G	0.897134	ADGRV1;NR2F1-AS1;KIAA0825;CETN3;ARRDC3-AS1;FAM172A	NR2F1-AS1;ADGRV1	5
51		rs4869412	5:92455655:A:G	lead	5	92455655	5:92493318:C:T	0.89271	ADGRV1;NR2F1-AS1;KIAA0825;CETN3;ARRDC3-AS1;FAM172A	NR2F1-AS1;ADGRV1	5
52*	FER	rs6889995	5:108210304:A:G	lead	5	108210304	5:108128002:A:T	0.960159	TMEM232	TMEM232	3a
52		rs6889995	5:108210304:A:G	lead	5	108210304	5:108211751:A:C	1	TMEM232;FBXL17;PJA2;LINC01023;LINC01848;FER	TMEM232	3a
52		rs6889995	5:108210304:A:G	lead	5	108210304	5:108220732:C:G	0.994213	TMEM232;FBXL17;PJA2;LINC01023;LINC01848;FER	TMEM232	3a
52		rs6889995	5:108210304:A:G	lead	5	108210304	5:108124084:C:T	0.960159	TMEM232	TMEM232	4
52		rs6889995	5:108210304:A:G	lead	5	108210304	5:108149069:A:G	0.960159	TMEM232	TMEM232	4
52		rs6889995	5:108210304:A:G	lead	5	108210304	5:108209206:A:G	1	TMEM232;FBXL17;PJA2;LINC01023;LINC01848;FER	TMEM232	4
52		rs6889995	5:108210304:A:G	lead	5	108210304	5:108209645:G:T	1	TMEM232;FBXL17;PJA2;LINC01023;LINC01848;FER	TMEM232	4
52		rs6889995	5:108210304:A:G	lead	5	108210304	5:108106624:D:I	0.944058	PJA2;TMEM232;MAN2A1;CAMK4	TMEM232	5
52		rs6889995	5:108210304:A:G	lead	5	108210304	5:108108500:A:G	0.960159	PJA2;TMEM232;MAN2A1;CAMK4	TMEM232	5
52		rs6889995	5:108210304:A:G	lead	5	108210304	5:108116551:D:I	0.928008	PJA2;TMEM232;MAN2A1;CAMK4	TMEM232	5
52		rs6889995	5:108210304:A:G	lead	5	108210304	5:108121356:A:G	0.960159	TMEM232	TMEM232	5
52		rs6889995	5:108210304:A:G	lead	5	108210304	5:108121764:A:T	0.960159	TMEM232	TMEM232	5
52		rs6889995	5:108210304:A:G	lead	5	108210304	5:108123506:C:T	0.960159	TMEM232	TMEM232	5
52		rs6889995	5:108210304:A:G	lead	5	108210304	5:108124235:D:I	0.927061	TMEM232	TMEM232	5
52		rs6889995	5:108210304:A:G	lead	5	108210304	5:108124439:C:T	0.954972	TMEM232	TMEM232	5
52		rs6889995	5:108210304:A:G	lead	5	108210304	5:108124482:C:T	0.954972	TMEM232	TMEM232	5
52		rs6889995	5:108210304:A:G	lead	5	108210304	5:108128959:C:T	0.95444	TMEM232	TMEM232	5
52		rs6889995	5:108210304:A:G	lead	5	108210304	5:108145010:C:T	0.960159	TMEM232	TMEM232	5
52		rs6889995	5:108210304:A:G	lead	5	108210304	5:108145817:C:T	0.960159	TMEM232	TMEM232	5
52		rs6889995	5:108210304:A:G	lead	5	108210304	5:108151711:C:G	0.960159	TMEM232	TMEM232	5
52		rs6889995	5:108210304:A:G	lead	5	108210304	5:108152069:C:T	0.960159	TMEM232	TMEM232	5
52		rs6889995	5:108210304:A:G	lead	5	108210304	5:108156879:A:G	0.960159	TMEM232	TMEM232	5
52		rs6889995	5:108210304:A:G	lead	5	108210304	5:108164591:A:G	0.971705	PJA2;TMEM232;MAN2A1	TMEM232	5
52		rs6889995	5:108210304:A:G	lead	5	108210304	5:108172540:A:T	0.971705	PJA2;TMEM232;MAN2A1	TMEM232	5
52		rs6889995	5:108210304:A:G	lead	5	108210304	5:108178451:A:G	0.977287	PJA2;TMEM232;MAN2A1	TMEM232	5
52		rs6889995	5:108210304:A:G	lead	5	108210304	5:108186813:G:T	0.948715	PJA2;TMEM232;MAN2A1	TMEM232	5
52		rs6889995	5:108210304:A:G	lead	5	108210304	5:108196668:C:T	0.971401	PJA2;TMEM232;MAN2A1	TMEM232	5
52		rs6889995	5:108210304:A:G	lead	5	108210304	5:108205139:A:C	0.971401	TMEM232;FBXL17;PJA2;LINC01023;LINC01848;FER	TMEM232	5
52		rs6889995	5:108210304:A:G	lead	5	108210304	5:108208280:C:T	0.971401	TMEM232;FBXL17;PJA2;LINC01023;LINC01848;FER	TMEM232	5
52		rs6889995	5:108210304:A:G	lead	5	108210304	5:108209488:C:T	1	TMEM232;FBXL17;PJA2;LINC01023;LINC01848;FER	TMEM232	5
52		rs6889995	5:108210304:A:G	lead	5	108210304	5:108213168:A:G	1	TMEM232;FBXL17;PJA2;LINC01023;LINC01848;FER	TMEM232	5
53	STARD4	rs67968533	5:111046342:C:T	lead	5	111046342	5:111040973:A:G	0.883447	NREP;EPB41L4A-AS1;STARD4-AS1;CAMK4;NREP-AS1;EPB41L4A;APC	NREP	5
53		rs67968533	5:111046342:C:T	lead	5	111046342	5:111042364:A:C	0.818646	NREP;EPB41L4A-AS1;STARD4-AS1;CAMK4;NREP-AS1;EPB41L4A;APC	NREP	5
53		rs67968533	5:111046342:C:T	lead	5	111046342	5:111056726:A:C	0.892649	NREP;EPB41L4A-AS1;STARD4-AS1;CAMK4;NREP-AS1;EPB41L4A;APC	NREP	5
54	LOC101927421 - ZNF608	rs12654442	5:124343851:C:T	lead	5	124343851	5:124341259:A:T	0.840974	ZNF608;GRAMD2B;LOC100505841;CEP120;SNCAIP;ZNF474;LOX;SNX2;ALDH7A1	ZNF608	2b
54		rs12654442	5:124343851:C:T	lead	5	124343851	5:124347852:C:T	0.822262	ZNF608;GRAMD2B;LOC100505841;CEP120;SNCAIP;ZNF474;LOX;SNX2;ALDH7A1	ZNF608	2b
54		rs12654442	5:124343851:C:T	lead	5	124343851	5:124348767:G:T	0.835191	ZNF608;GRAMD2B;LOC100505841;CEP120;SNCAIP;ZNF474;LOX;SNX2;ALDH7A1	ZNF608	2b
54		rs12654442	5:124343851:C:T	lead	5	124343851	5:124342470:A:C	0.845254	ZNF608;GRAMD2B;LOC100505841;CEP120;SNCAIP;ZNF474;LOX;SNX2;ALDH7A1	ZNF608	4
54		rs12654442	5:124343851:C:T	lead	5	124343851	5:124347808:A:G	0.84137	ZNF608;GRAMD2B;LOC100505841;CEP120;SNCAIP;ZNF474;LOX;SNX2;ALDH7A1	ZNF608	4
54		rs12654442	5:124343851:C:T	lead	5	124343851	5:124350034:A:G	0.839491	ZNF608;GRAMD2B;LOC100505841;CEP120;SNCAIP;ZNF474;LOX;SNX2;ALDH7A1	ZNF608	5
54		rs12654442	5:124343851:C:T	lead	5	124343851	5:124351539:A:G	0.828038	ZNF608;GRAMD2B;LOC100505841;CEP120;SNCAIP;ZNF474;LOX;SNX2;ALDH7A1	ZNF608	5
55	SLC27A6	rs2577531	5:128299279:C:T	lead	5	128299279	5:128263420:A:G	0.912328	ADAMTS19;SLC27A6;KIAA1024L;CTXN3;MIR4460;PRRC1;RAPGEF6	ADAMTS19	4
55		rs2577531	5:128299279:C:T	lead	5	128299279	5:128263455:C:T	0.912328	ADAMTS19;SLC27A6;KIAA1024L;CTXN3;MIR4460;PRRC1;RAPGEF6	ADAMTS19	4
55		rs2577531	5:128299279:C:T	lead	5	128299279	5:128264677:A:C	0.912328	ADAMTS19;SLC27A6;KIAA1024L;CTXN3;MIR4460;PRRC1;RAPGEF6	ADAMTS19	4
55		rs2577531	5:128299279:C:T	lead	5	128299279	5:128257127:C:T	0.84791	ADAMTS19;SLC27A6;KIAA1024L;CTXN3;MIR4460;PRRC1;RAPGEF6	ADAMTS19	5
55		rs2577531	5:128299279:C:T	lead	5	128299279	5:128263321:A:G	0.912328	ADAMTS19;SLC27A6;KIAA1024L;CTXN3;MIR4460;PRRC1;RAPGEF6	ADAMTS19	5
55		rs2577531	5:128299279:C:T	lead	5	128299279	5:128263814:C:G	0.910763	ADAMTS19;SLC27A6;KIAA1024L;CTXN3;MIR4460;PRRC1;RAPGEF6	ADAMTS19	5
55		rs2577531	5:128299279:C:T	lead	5	128299279	5:128263862:C:T	0.850258	ADAMTS19;SLC27A6;KIAA1024L;CTXN3;MIR4460;PRRC1;RAPGEF6	ADAMTS19	5
55		rs2577531	5:128299279:C:T	lead	5	128299279	5:128268831:C:T	0.911532	ADAMTS19;SLC27A6;KIAA1024L;CTXN3;MIR4460;PRRC1;RAPGEF6	ADAMTS19	5
56	FGF18	rs78810186	5:170868622:C:T	lead	5	170868622	5:170868622:C:T	1	BNIP1;UBTD2;SNORA74B;CPEB4;SH3PXD2B	BNIP1	5
56		rs78810186	5:170868622:C:T	lead	5	170868622	5:170867231:G:T	0.851894	BNIP1;UBTD2;SNORA74B;CPEB4;SH3PXD2B	BNIP1	5
57	LINC01411	rs4868384	5:173779209:A:T	lead	5	173779209	5:173779716:C:T	1	NSG2;LOC285593;MIR4634;DRD1;CPLX2;LINC01951;RAB24;CPEB4;C5orf47	NSG2	5
57		rs7447819	5:174150696:A:C	conditional	5	174150696	5:174150696:A:C	1	ATP6V0E1	ATP6V0E1	2b
57		rs10035459	5:173764371:A:G	conditional	5	173764371	5:173764371:A:G	1	NSG2;LOC285593;MIR4634;DRD1;CPLX2;LINC01951;RAB24;CPEB4;C5orf47	NSG2	3a
57		rs10035459	5:173764371:A:G	conditional	5	173764371	5:173764548:A:G	0.955329	NSG2;LOC285593;MIR4634;DRD1;CPLX2;LINC01951;RAB24;CPEB4;C5orf47	NSG2	4
57		rs185232000	5:173800675:C:T	conditional	5	173800675	5:173892033:A:G	0.83166	LINC01951;MIR4634;NSG2;CPLX2	LINC01951	4
58	DSP	rs72825038	6:7527269:A:G	lead	6	7527269	6:7527269:A:G	1	RIOK1;SNRNP48;CAGE1;GCNT2;MIR3691;PPP1R3G;MIR5689	RIOK1	5
58		rs75945653	6:7553063:G:T	conditional	6	7553063	6:7553063:G:T	1	RIOK1;SNRNP48;CAGE1;GCNT2;MIR3691;PPP1R3G;MIR5689	RIOK1	5
59	DEK	rs214502	6:18227546:A:C	lead	6	18227546	6:18221471:G:T	0.846923	FAM8A1;NHLRC1;ID4;NUP153;GMPR;E2F3;MBOAT1;KIF13A;DTNBP1	FAM8A1	4
59		rs214502	6:18227546:A:C	lead	6	18227546	6:18227546:A:C	1	FAM8A1;NHLRC1;ID4;NUP153;GMPR;E2F3;MBOAT1;KIF13A;DTNBP1	FAM8A1	5
59		rs214502	6:18227546:A:C	lead	6	18227546	6:18218989:A:G	0.968049	FAM8A1;NHLRC1;ID4;NUP153;GMPR;E2F3;MBOAT1;KIF13A;DTNBP1	FAM8A1	5
60	HDGFL1	rs6922960	6:22570189:C:T	lead	6	22570189	6:22570189:C:T	1	PRL;CDKAL1;E2F3;DCDC2;CASC15;CARMIL1;SOX4;GPLD1	PRL	5
61	LRRC16A	rs139915396	6:25351477:D:I	lead	6	25351477	6:25351477:D:I	1	CARMIL1;OR2B6;ZSCAN31;ZNF165	CARMIL1	5
61		rs139915396	6:25351477:D:I	lead	6	25351477	6:25346944:D:I	0.835466	CARMIL1;OR2B6;ZSCAN31;ZNF165	CARMIL1	5
61		rs139915396	6:25351477:D:I	lead	6	25351477	6:25347646:G:T	0.839117	CARMIL1;OR2B6;ZSCAN31;ZNF165	CARMIL1	5
61		rs139915396	6:25351477:D:I	lead	6	25351477	6:25363132:A:G	0.865952	CARMIL1;SLC17A2;HIST1H2AK	CARMIL1	5
62	CDKN1A	rs730506	6:36645968:C:G	lead	6	36645968	6:36645968:C:G	1	SRSF3;NUDT3	SRSF3	4
62		rs730506	6:36645968:C:G	lead	6	36645968	6:36645988:C:G	0.998862	SRSF3;NUDT3	SRSF3	4
63	TFEB	rs1015149	6:41658889:C:T	lead	6	41658889	6:41662890:C:G	0.820899	KCNK5;KIF6;GTPBP2	KCNK5	2b
63		rs1015149	6:41658889:C:T	lead	6	41658889	6:41662843:C:G	0.838322	KCNK5;KIF6;GTPBP2	KCNK5	4
63		rs1015149	6:41658889:C:T	lead	6	41658889	6:41658889:C:T	1	KCNK5;KIF6;GTPBP2	KCNK5	5
63		rs1015149	6:41658889:C:T	lead	6	41658889	6:41659304:C:T	0.810914	KCNK5;KIF6;GTPBP2	KCNK5	5
64	RCAN2	rs871728	6:46452619:C:T	lead	6	46452619	6:46459395:A:C	0.887204	ENPP4;MEP1A;RCAN2;TNFRSF21;SUPT3H;ADGRF5;ADGRF1;ADGRF4;CLIC5;AARS2	ENPP4	4
64		rs871728	6:46452619:C:T	lead	6	46452619	6:46460147:A:T	0.957559	ENPP4;MEP1A;RCAN2;TNFRSF21;SUPT3H;ADGRF5;ADGRF1;ADGRF4;CLIC5;AARS2	ENPP4	4
64		rs871728	6:46452619:C:T	lead	6	46452619	6:46469769:D:I	0.84192	ENPP4;MEP1A;RCAN2;TNFRSF21;SUPT3H;ADGRF5;ADGRF1;ADGRF4;CLIC5;AARS2	ENPP4	4
64		rs871728	6:46452619:C:T	lead	6	46452619	6:46446357:C:T	0.920338	ENPP4;MEP1A;RCAN2;TNFRSF21;SUPT3H;ADGRF5;ADGRF1;ADGRF4;CLIC5;AARS2	ENPP4	5
64		rs871728	6:46452619:C:T	lead	6	46452619	6:46452619:C:T	1	ENPP4;MEP1A;RCAN2;TNFRSF21;SUPT3H;ADGRF5;ADGRF1;ADGRF4;CLIC5;AARS2	ENPP4	5
64		rs871728	6:46452619:C:T	lead	6	46452619	6:46455599:C:T	0.994837	ENPP4;MEP1A;RCAN2;TNFRSF21;SUPT3H;ADGRF5;ADGRF1;ADGRF4;CLIC5;AARS2	ENPP4	5
64		rs871728	6:46452619:C:T	lead	6	46452619	6:46456536:C:T	0.91454	ENPP4;MEP1A;RCAN2;TNFRSF21;SUPT3H;ADGRF5;ADGRF1;ADGRF4;CLIC5;AARS2	ENPP4	5
64		rs871728	6:46452619:C:T	lead	6	46452619	6:46461236:C:T	0.866015	ENPP4;MEP1A;RCAN2;TNFRSF21;SUPT3H;ADGRF5;ADGRF1;ADGRF4;CLIC5;AARS2	ENPP4	5
64		rs871728	6:46452619:C:T	lead	6	46452619	6:46463255:G:T	0.956811	ENPP4;MEP1A;RCAN2;TNFRSF21;SUPT3H;ADGRF5;ADGRF1;ADGRF4;CLIC5;AARS2	ENPP4	5
64		rs871728	6:46452619:C:T	lead	6	46452619	6:46464887:A:G	0.855703	ENPP4;MEP1A;RCAN2;TNFRSF21;SUPT3H;ADGRF5;ADGRF1;ADGRF4;CLIC5;AARS2	ENPP4	5
64		rs871728	6:46452619:C:T	lead	6	46452619	6:46475421:A:G	0.898374	ENPP4;MEP1A;RCAN2;TNFRSF21;SUPT3H;ADGRF5;ADGRF1;ADGRF4;CLIC5;AARS2	ENPP4	5
64		rs871728	6:46452619:C:T	lead	6	46452619	6:46478934:A:G	0.846311	ENPP4;MEP1A;RCAN2;TNFRSF21;SUPT3H;ADGRF5;ADGRF1;ADGRF4;CLIC5;AARS2	ENPP4	5
65	LOC101927686	rs111739590	6:113978255:C:T	lead	6	113978255	6:113984567:A:T	0.830588	FLJ34503;FYN;WISP3;RFPL4B;MARCKS;LAMA4;FAM229B;REV3L;SLC16A10;AMD1	FLJ34503	5
66	TCF21	rs12190287	6:134214525:C:G	lead	6	134214525	6:134214525:C:G	1	TAAR1;TAAR8;VNN2;HMGA1P7;MYB;TAAR6;VNN1;ENPP1;STX7;PEX7;EYA4;MED23	TAAR1	3a
67	RP1-155D22.1	rs206708	6:164532059:A:T	lead	6	164532059	6:164528867:A:T	0.950246	CAHM;PACRG-AS1;C6orf118;PRKN;PACRG;AGPAT4;AGPAT4-IT1;DKFZp451B082	CAHM	3a
67		rs206708	6:164532059:A:T	lead	6	164532059	6:164526945:D:I	0.925605	CAHM;PACRG-AS1;C6orf118;PRKN;PACRG;AGPAT4;AGPAT4-IT1;DKFZp451B082	CAHM	5
67		rs206708	6:164532059:A:T	lead	6	164532059	6:164533028:C:T	0.984734	CAHM;PACRG-AS1;C6orf118;PRKN;PACRG;AGPAT4;AGPAT4-IT1;DKFZp451B082	CAHM	5
69	DGKB	rs56352403	7:14453835:A:G	lead	7	14453835	7:14454355:A:G	0.995821	ETV1;ARL4A;SCIN;SOSTDC1;DGKB;ISPD;THSD7A	ETV1	5
69		rs55734480	7:14372009:A:G	conditional	7	14372009	7:14372009:A:G	1	ETV1;ARL4A;SCIN;THSD7A;DGKB;AGR2	ETV1	2b
70	PRPS1L1	rs6961768	7:18040476:A:C	lead	7	18040476	7:18040239:G:T	0.980185	HDAC9;ANKMY2;AGR2;ISPD;RPL23P8;ABCB5;MIR3146	HDAC9	3a
70		rs6961768	7:18040476:A:C	lead	7	18040476	7:18040264:C:T	0.984039	HDAC9;ANKMY2;AGR2;ISPD;RPL23P8;ABCB5;MIR3146	HDAC9	3a
70		rs6961768	7:18040476:A:C	lead	7	18040476	7:18040476:A:C	1	HDAC9;ANKMY2;AGR2;ISPD;RPL23P8;ABCB5;MIR3146	HDAC9	4
70		rs6961768	7:18040476:A:C	lead	7	18040476	7:18040201:A:G	0.976582	HDAC9;ANKMY2;AGR2;ISPD;RPL23P8;ABCB5;MIR3146	HDAC9	5
71	DNAH11	rs62441680	7:21622494:C:T	lead	7	21622494	7:21619733:C:T	0.929539	ABCB5;RAPGEF5;CDCA7L;KLHL7;MACC1-AS1;SP8;DNAH11;RPL23P8;HDAC9;CCDC126;MPP6;FAM221A;STK31;TMEM196;TRA2A;ITGB8	ABCB5	2b
71		rs62441680	7:21622494:C:T	lead	7	21622494	7:21626856:A:G	0.800822	ABCB5;RAPGEF5;CDCA7L;KLHL7;MACC1-AS1;SP8;DNAH11;RPL23P8;HDAC9;CCDC126;MPP6;FAM221A;STK31;TMEM196;TRA2A;ITGB8	ABCB5	4
71		rs62441680	7:21622494:C:T	lead	7	21622494	7:21624324:C:T	0.916976	ABCB5;RAPGEF5;CDCA7L;KLHL7;MACC1-AS1;SP8;DNAH11;RPL23P8;HDAC9;CCDC126;MPP6;FAM221A;STK31;TMEM196;TRA2A;ITGB8	ABCB5	5
71		rs62441680	7:21622494:C:T	lead	7	21622494	7:21628197:A:G	0.927814	ABCB5;RAPGEF5;CDCA7L;KLHL7;MACC1-AS1;SP8;DNAH11;RPL23P8;HDAC9;CCDC126;MPP6;FAM221A;STK31;TMEM196;TRA2A;ITGB8	ABCB5	5
74	CHRM2	rs1424569	7:136569416:C:T	lead	7	136569416	7:136569416:C:T	1	CHRM2;SLC13A4;WDR91;STMP1;LRGUK;LOC349160	CHRM2	5
75	DLC1	rs1188285	8:13130478:C:T	lead	8	13130478	8:13128100:A:G	0.850887	DLC1;C8orf48	DLC1	3a
75		rs1188285	8:13130478:C:T	lead	8	13130478	8:13132137:A:G	0.9895	DLC1;C8orf48	DLC1	3a
75		rs1188285	8:13130478:C:T	lead	8	13130478	8:13110302:C:G	0.802256	DLC1;C8orf48;KIAA1456;MIR3926-2	DLC1	5
75		rs1188285	8:13130478:C:T	lead	8	13130478	8:13128224:A:G	0.96564	DLC1;C8orf48	DLC1	5
75		rs1188285	8:13130478:C:T	lead	8	13130478	8:13132534:C:G	0.9853	DLC1;C8orf48	DLC1	5
75		rs118045325	8:13145524:A:T	conditional	8	13145524	8:13172329:C:T	0.918254	DLC1;C8orf48	DLC1	3a
75		rs118045325	8:13145524:A:T	conditional	8	13145524	8:13145524:A:T	1	DLC1;C8orf48	DLC1	5
75		rs17222010	8:13369061:A:G	conditional	8	13369061	8:13369061:A:G	1	DLC1;KIAA1456;MIR3926-2;C8orf48;LINC00681	DLC1	5
76	MTUS1	rs4921804	8:17550623:A:G	lead	8	17550623	8:17552994:A:G	0.928983	MTMR7;FGL1;LZTS1;MTUS1;PCM1;SLC7A2;FGF20	MTMR7	2b
76		rs4921804	8:17550623:A:G	lead	8	17550623	8:17549552:A:T	0.949481	MTMR7;FGL1;LZTS1;MTUS1;PCM1;SLC7A2;FGF20	MTMR7	4
76		rs4921804	8:17550623:A:G	lead	8	17550623	8:17549923:G:T	0.962716	MTMR7;FGL1;LZTS1;MTUS1;PCM1;SLC7A2;FGF20	MTMR7	4
76		rs4921804	8:17550623:A:G	lead	8	17550623	8:17550623:A:G	1	MTMR7;FGL1;LZTS1;MTUS1;PCM1;SLC7A2;FGF20	MTMR7	4
76		rs4921804	8:17550623:A:G	lead	8	17550623	8:17550205:G:T	0.967412	MTMR7;FGL1;LZTS1;MTUS1;PCM1;SLC7A2;FGF20	MTMR7	5
76		rs4921804	8:17550623:A:G	lead	8	17550623	8:17550280:C:T	0.925217	MTMR7;FGL1;LZTS1;MTUS1;PCM1;SLC7A2;FGF20	MTMR7	5
76		rs4921804	8:17550623:A:G	lead	8	17550623	8:17550643:C:T	0.997728	MTMR7;FGL1;LZTS1;MTUS1;PCM1;SLC7A2;FGF20	MTMR7	5
76		rs4921804	8:17550623:A:G	lead	8	17550623	8:17550982:C:G	0.966892	MTMR7;FGL1;LZTS1;MTUS1;PCM1;SLC7A2;FGF20	MTMR7	5
76		rs4921804	8:17550623:A:G	lead	8	17550623	8:17552782:C:G	0.923417	MTMR7;FGL1;LZTS1;MTUS1;PCM1;SLC7A2;FGF20	MTMR7	5
77	XPO7	rs56317071	8:21775838:C:G	lead	8	21775838	8:21775838:C:G	1	INTS10;LINC02153;LZTS1-AS1;LGI3;CSGALNACT1;LZTS1;PSD3	INTS10	2b
78	RBPMS	rs4545054	8:30302465:C:T	lead	8	30302465	8:30322735:G:T	0.955868	INTS9;MBOAT4;KIF13B;SARAF;RBPMS;HMBOX1;FBXO16;DUSP4	INTS9	3a
78		rs4545054	8:30302465:C:T	lead	8	30302465	8:30303833:A:C	0.980913	RBPMS;SARAF;HMBOX1;MBOAT4;ZNF395	INTS9	4
78		rs4545054	8:30302465:C:T	lead	8	30302465	8:30310335:C:T	0.981653	RBPMS;SARAF;HMBOX1;MBOAT4;ZNF395	INTS9	4
78		rs4545054	8:30302465:C:T	lead	8	30302465	8:30341945:A:G	0.904313	INTS9;MBOAT4;KIF13B;SARAF;RBPMS;HMBOX1;FBXO16;DUSP4	INTS9	4
78		rs4545054	8:30302465:C:T	lead	8	30302465	8:30366899:C:G	0.833475	MBOAT4;RBPMS;SARAF;HMBOX1;KIF13B;SCARA3;SMIM18;EXTL3;SCARA5;PPP2CB;INTS9	INTS9	4
78		rs4545054	8:30302465:C:T	lead	8	30302465	8:30302465:C:T	1	RBPMS;SARAF;HMBOX1;MBOAT4;ZNF395	INTS9	5
78		rs4545054	8:30302465:C:T	lead	8	30302465	8:30306419:A:C	0.985643	RBPMS;SARAF;HMBOX1;MBOAT4;ZNF395	INTS9	5
78		rs4545054	8:30302465:C:T	lead	8	30302465	8:30316162:A:G	0.965237	RBPMS;SARAF;HMBOX1;MBOAT4;ZNF395	INTS9	5
78		rs4545054	8:30302465:C:T	lead	8	30302465	8:30324803:C:T	0.961919	INTS9;MBOAT4;KIF13B;SARAF;RBPMS;HMBOX1;FBXO16;DUSP4	INTS9	5
78		rs4545054	8:30302465:C:T	lead	8	30302465	8:30344444:C:T	0.901176	INTS9;MBOAT4;KIF13B;SARAF;RBPMS;HMBOX1;FBXO16;DUSP4	INTS9	5
78		rs4545054	8:30302465:C:T	lead	8	30302465	8:30346587:A:G	0.900257	INTS9;MBOAT4;KIF13B;SARAF;RBPMS;HMBOX1;FBXO16;DUSP4	INTS9	5
78		rs4545054	8:30302465:C:T	lead	8	30302465	8:30349914:A:G	0.897997	INTS9;MBOAT4;KIF13B;SARAF;RBPMS;HMBOX1;FBXO16;DUSP4	INTS9	5
78		rs4545054	8:30302465:C:T	lead	8	30302465	8:30352258:C:T	0.901102	INTS9;MBOAT4;KIF13B;SARAF;RBPMS;HMBOX1;FBXO16;DUSP4	INTS9	5
78		rs4545054	8:30302465:C:T	lead	8	30302465	8:30383013:A:G	0.811668	MBOAT4;RBPMS;SARAF;HMBOX1;KIF13B;SCARA3;SMIM18;EXTL3;SCARA5;PPP2CB;INTS9	INTS9	5
78		rs4545054	8:30302465:C:T	lead	8	30302465	8:30388869:D:I	0.812581	MBOAT4;RBPMS;SARAF;HMBOX1;KIF13B;SCARA3;SMIM18;EXTL3;SCARA5;PPP2CB;INTS9	INTS9	5
78		rs4545054	8:30302465:C:T	lead	8	30302465	8:30390205:A:G	0.810961	MBOAT4;RBPMS;SARAF;HMBOX1;KIF13B;SCARA3;SMIM18;EXTL3;SCARA5;PPP2CB;INTS9	INTS9	5
78		rs4545054	8:30302465:C:T	lead	8	30302465	8:30390284:C:T	0.814201	MBOAT4;RBPMS;SARAF;HMBOX1;KIF13B;SCARA3;SMIM18;EXTL3;SCARA5;PPP2CB;INTS9	INTS9	5
80	RP11-1082L8.3	rs35006907	8:125859817:A:C	lead	8	125859817	8:125859817:A:C	1	TATDN1;PVT1	TATDN1	4
80		rs35006907	8:125859817:A:C	lead	8	125859817	8:125859850:A:G	0.833357	TATDN1;PVT1	TATDN1	4
80		rs35006907	8:125859817:A:C	lead	8	125859817	8:125861374:C:T	0.958987	TATDN1;PVT1	TATDN1	4
80		rs35006907	8:125859817:A:C	lead	8	125859817	8:125867834:A:T	0.95064	TATDN1;PVT1	TATDN1	5
80		rs35006907	8:125859817:A:C	lead	8	125859817	8:125876444:A:G	0.915084	TATDN1;PVT1	TATDN1	5
80		rs35006907	8:125859817:A:C	lead	8	125859817	8:125894151:C:T	0.893645	LINC00964;MTSS1;TATDN1;RNF139;SQLE	TATDN1	5
81	PTK2	rs10106406	8:142006198:C:G	lead	8	142006198	8:141962642:C:T	0.879091	DENND3;PTK2;SLC45A4	PTK2;DENND3	1d
81		rs10106406	8:142006198:C:G	lead	8	142006198	8:141719251:A:G	0.850701	PTK2;DENND3;LINC01300;TRAPPC9	PTK2;DENND3	1f
81		rs10106406	8:142006198:C:G	lead	8	142006198	8:141834000:A:G	0.814794	DENND3;SLC45A4	PTK2;DENND3	1f
81		rs10106406	8:142006198:C:G	lead	8	142006198	8:141883156:C:T	0.841994	PTK2;DENND3	PTK2;DENND3	1f
81		rs10106406	8:142006198:C:G	lead	8	142006198	8:141918880:A:G	0.880464	PTK2;DENND3	PTK2;DENND3	1f
81		rs10106406	8:142006198:C:G	lead	8	142006198	8:142000187:A:T	0.862454	PTK2;DENND3	PTK2;DENND3	1f
81		rs10106406	8:142006198:C:G	lead	8	142006198	8:142009527:A:G	0.973183	PTK2;DENND3	PTK2;DENND3	1f
81		rs10106406	8:142006198:C:G	lead	8	142006198	8:141867516:A:T	0.818863	DENND3;PTK2	PTK2;DENND3	2b
81		rs10106406	8:142006198:C:G	lead	8	142006198	8:142001948:A:G	0.888637	PTK2;DENND3	PTK2;DENND3	2b
81		rs10106406	8:142006198:C:G	lead	8	142006198	8:142005742:A:C	0.897799	PTK2;DENND3	PTK2;DENND3	2b
81		rs10106406	8:142006198:C:G	lead	8	142006198	8:141841577:A:G	0.81307	DENND3;PTK2	PTK2;DENND3	3a
81		rs10106406	8:142006198:C:G	lead	8	142006198	8:141862562:C:T	0.819131	DENND3;PTK2	PTK2;DENND3	3a
81		rs10106406	8:142006198:C:G	lead	8	142006198	8:141960578:C:T	0.88132	DENND3;PTK2;SLC45A4	PTK2;DENND3	3a
81		rs10106406	8:142006198:C:G	lead	8	142006198	8:141831241:C:T	0.811759	DENND3;SLC45A4	PTK2;DENND3	4
81		rs10106406	8:142006198:C:G	lead	8	142006198	8:141890513:G:T	0.860456	PTK2;DENND3	PTK2;DENND3	4
81		rs10106406	8:142006198:C:G	lead	8	142006198	8:141916188:D:I	0.881961	PTK2;DENND3	PTK2;DENND3	4
81		rs10106406	8:142006198:C:G	lead	8	142006198	8:141963690:C:G	0.88132	DENND3;PTK2;SLC45A4	PTK2;DENND3	4
81		rs10106406	8:142006198:C:G	lead	8	142006198	8:141965397:A:G	0.882604	DENND3;PTK2;SLC45A4	PTK2;DENND3	4
81		rs10106406	8:142006198:C:G	lead	8	142006198	8:141965781:G:T	0.878968	DENND3;PTK2;SLC45A4	PTK2;DENND3	4
81		rs10106406	8:142006198:C:G	lead	8	142006198	8:141965888:A:G	0.879609	DENND3;PTK2;SLC45A4	PTK2;DENND3	4
81		rs10106406	8:142006198:C:G	lead	8	142006198	8:141969994:A:G	0.877303	DENND3;PTK2;SLC45A4	PTK2;DENND3	4
81		rs10106406	8:142006198:C:G	lead	8	142006198	8:141974134:C:G	0.861227	DENND3;PTK2;SLC45A4	PTK2;DENND3	4
81		rs10106406	8:142006198:C:G	lead	8	142006198	8:141998014:A:G	0.882604	DENND3;PTK2;SLC45A4	PTK2;DENND3	4
81		rs10106406	8:142006198:C:G	lead	8	142006198	8:142002897:A:C	0.896482	PTK2;DENND3	PTK2;DENND3	4
81		rs10106406	8:142006198:C:G	lead	8	142006198	8:142005671:C:T	0.882604	PTK2;DENND3	PTK2;DENND3	4
81		rs10106406	8:142006198:C:G	lead	8	142006198	8:142007743:D:I	0.881138	PTK2;DENND3	PTK2;DENND3	4
81		rs10106406	8:142006198:C:G	lead	8	142006198	8:142010684:A:G	0.875223	PTK2;DENND3	PTK2;DENND3	4
81		rs10106406	8:142006198:C:G	lead	8	142006198	8:142011053:C:G	0.859897	PTK2;DENND3	PTK2;DENND3	4
81		rs10106406	8:142006198:C:G	lead	8	142006198	8:141718701:A:T	0.824171	PTK2;DENND3;LINC01300;TRAPPC9	PTK2;DENND3	5
81		rs10106406	8:142006198:C:G	lead	8	142006198	8:141735794:G:T	0.868545	PTK2;CHRAC1	PTK2;DENND3	5
81		rs10106406	8:142006198:C:G	lead	8	142006198	8:141775337:C:T	0.874579	DENND3;SLC45A4;PTK2	PTK2;DENND3	5
81		rs10106406	8:142006198:C:G	lead	8	142006198	8:141829810:A:G	0.814174	DENND3;SLC45A4	PTK2;DENND3	5
81		rs10106406	8:142006198:C:G	lead	8	142006198	8:141833530:A:G	0.814794	DENND3;SLC45A4	PTK2;DENND3	5
81		rs10106406	8:142006198:C:G	lead	8	142006198	8:141834110:A:T	0.814794	DENND3;SLC45A4	PTK2;DENND3	5
81		rs10106406	8:142006198:C:G	lead	8	142006198	8:141839234:A:G	0.81307	DENND3;SLC45A4	PTK2;DENND3	5
81		rs10106406	8:142006198:C:G	lead	8	142006198	8:141875162:G:T	0.805282	DENND3;PTK2	PTK2;DENND3	5
81		rs10106406	8:142006198:C:G	lead	8	142006198	8:141878414:C:T	0.822895	DENND3;PTK2	PTK2;DENND3	5
81		rs10106406	8:142006198:C:G	lead	8	142006198	8:141883751:A:G	0.833497	PTK2;DENND3	PTK2;DENND3	5
81		rs10106406	8:142006198:C:G	lead	8	142006198	8:141895696:C:G	0.848105	PTK2;DENND3	PTK2;DENND3	5
81		rs10106406	8:142006198:C:G	lead	8	142006198	8:141898518:C:T	0.841547	PTK2;DENND3	PTK2;DENND3	5
81		rs10106406	8:142006198:C:G	lead	8	142006198	8:141904388:A:G	0.847319	PTK2;DENND3	PTK2;DENND3	5
81		rs10106406	8:142006198:C:G	lead	8	142006198	8:141907217:A:G	0.84841	PTK2;DENND3	PTK2;DENND3	5
81		rs10106406	8:142006198:C:G	lead	8	142006198	8:141918181:C:G	0.881961	PTK2;DENND3	PTK2;DENND3	5
81		rs10106406	8:142006198:C:G	lead	8	142006198	8:141972542:A:C	0.878577	DENND3;PTK2;SLC45A4	PTK2;DENND3	5
81		rs10106406	8:142006198:C:G	lead	8	142006198	8:141975188:A:T	0.879184	DENND3;PTK2;SLC45A4	PTK2;DENND3	5
81		rs10106406	8:142006198:C:G	lead	8	142006198	8:141975457:C:T	0.970863	DENND3;PTK2;SLC45A4	PTK2;DENND3	5
81		rs10106406	8:142006198:C:G	lead	8	142006198	8:141976997:C:T	0.878328	DENND3;PTK2;SLC45A4	PTK2;DENND3	5
81		rs10106406	8:142006198:C:G	lead	8	142006198	8:141980988:D:I	0.81814	DENND3;PTK2;SLC45A4	PTK2;DENND3	5
81		rs10106406	8:142006198:C:G	lead	8	142006198	8:141981197:G:T	0.894324	DENND3;PTK2;SLC45A4	PTK2;DENND3	5
81		rs10106406	8:142006198:C:G	lead	8	142006198	8:141981929:A:G	0.88132	DENND3;PTK2;SLC45A4	PTK2;DENND3	5
81		rs10106406	8:142006198:C:G	lead	8	142006198	8:141984881:D:I	0.881818	DENND3;PTK2;SLC45A4	PTK2;DENND3	5
81		rs10106406	8:142006198:C:G	lead	8	142006198	8:141985905:G:T	0.894042	DENND3;PTK2;SLC45A4	PTK2;DENND3	5
81		rs10106406	8:142006198:C:G	lead	8	142006198	8:141990421:G:T	0.880587	DENND3;PTK2;SLC45A4	PTK2;DENND3	5
81		rs10106406	8:142006198:C:G	lead	8	142006198	8:141991440:A:T	0.867791	DENND3;PTK2;SLC45A4	PTK2;DENND3	5
81		rs10106406	8:142006198:C:G	lead	8	142006198	8:141994240:C:T	0.882604	DENND3;PTK2;SLC45A4	PTK2;DENND3	5
81		rs10106406	8:142006198:C:G	lead	8	142006198	8:141994271:D:I	0.974291	DENND3;PTK2;SLC45A4	PTK2;DENND3	5
81		rs10106406	8:142006198:C:G	lead	8	142006198	8:141994272:A:C	0.882514	DENND3;PTK2;SLC45A4	PTK2;DENND3	5
81		rs10106406	8:142006198:C:G	lead	8	142006198	8:141994393:G:T	0.936158	DENND3;PTK2;SLC45A4	PTK2;DENND3	5
81		rs10106406	8:142006198:C:G	lead	8	142006198	8:142000071:C:T	0.878849	PTK2;DENND3	PTK2;DENND3	5
81		rs10106406	8:142006198:C:G	lead	8	142006198	8:142002107:C:T	0.972414	PTK2;DENND3	PTK2;DENND3	5
81		rs10106406	8:142006198:C:G	lead	8	142006198	8:142003054:C:T	0.88132	PTK2;DENND3	PTK2;DENND3	5
81		rs10106406	8:142006198:C:G	lead	8	142006198	8:142005392:A:G	0.882604	PTK2;DENND3	PTK2;DENND3	5
81		rs10106406	8:142006198:C:G	lead	8	142006198	8:142006198:C:G	1	PTK2;DENND3	PTK2;DENND3	5
81		rs10106406	8:142006198:C:G	lead	8	142006198	8:142014531:C:T	0.811502	PTK2;DENND3	PTK2;DENND3	5
83	SPATA31D5P - RASEF	rs7043482	9:85135915:A:C	lead	9	85135915	9:85134754:A:G	0.907737	TLE4;RASEF;TLE1	TLE4	5
84	ASTN2	rs1407243	9:119314851:C:T	lead	9	119314851	9:119328189:C:T	0.874064	PAPPA;ATP6V1G1;MIR455;ASTN2-AS1;KIF12	PAPPA	5
86	BEND7	rs7916672	10:13534234:C:T	lead	10	13534234	10:13534234:C:T	1	NUDT5	NUDT5	2b
86		rs7916672	10:13534234:C:T	lead	10	13534234	10:13534851:A:G	0.867935	NUDT5	NUDT5	4
86		rs7916672	10:13534234:C:T	lead	10	13534234	10:13542761:C:T	0.825557	NUDT5	NUDT5	4
86		rs7916672	10:13534234:C:T	lead	10	13534234	10:13535398:C:T	0.867361	NUDT5	NUDT5	5
87	CCDC7	rs2947080	10:32847962:C:G	lead	10	32847962	10:32916310:A:G	0.956704	CCDC7;LYZL2;MTPAP;JCAD;PARD3;MAP3K8	CCDC7	3b
87		rs2947080	10:32847962:C:G	lead	10	32847962	10:32847962:C:G	1	PARD3;CCDC7	CCDC7	5
88	CEFIP	rs10776558	10:50510406:C:T	lead	10	50510406	10:50507975:A:C	0.885491	WDFY4;LRRC18;SGMS1;MIR4294;FRMPD2;PRKG1;CSTF2T;ARHGAP22	WDFY4	2b
88		rs10776558	10:50510406:C:T	lead	10	50510406	10:50516184:C:T	0.888306	WDFY4;LRRC18;SGMS1;MIR4294;FRMPD2;PRKG1;CSTF2T;ARHGAP22	WDFY4	4
88		rs10776558	10:50510406:C:T	lead	10	50510406	10:50518351:C:T	0.833109	WDFY4;LRRC18;SGMS1;MIR4294;FRMPD2;PRKG1;CSTF2T;ARHGAP22	WDFY4	4
88		rs10776558	10:50510406:C:T	lead	10	50510406	10:50510406:C:T	1	WDFY4;LRRC18;SGMS1;MIR4294;FRMPD2;PRKG1;CSTF2T;ARHGAP22	WDFY4	5
88		rs10776558	10:50510406:C:T	lead	10	50510406	10:50534599:A:G	0.852006	VSTM4;MIR4294;ZNF488;CEFIP;ARHGAP22;PRKG1;WDFY4	WDFY4	5
89	TMEM26	rs74813029	10:63194576:A:G	lead	10	63194576	10:63229696:C:T	0.965987	RHOBTB1;ZNF365;CABCOCO1;ANK3;CDK1;TMEM26	RHOBTB1;ZNF365	5
89		rs74813029	10:63194576:A:G	lead	10	63194576	10:63230568:C:T	0.965987	RHOBTB1;ZNF365;CABCOCO1;ANK3;CDK1;TMEM26	RHOBTB1;ZNF365	5
89		rs74813029	10:63194576:A:G	lead	10	63194576	10:63233954:C:T	0.933678	RHOBTB1;ZNF365;CABCOCO1;ANK3;CDK1;TMEM26	RHOBTB1;ZNF365	5
89		rs74813029	10:63194576:A:G	lead	10	63194576	10:63240354:A:G	0.945425	ZNF365;CABCOCO1;ARID5B;TMEM26;RHOBTB1;ANK3;LINC01553;FAM133CP;FAM13C;BICC1	RHOBTB1;ZNF365	5
90	COL13A1	rs2642608	10:71559723:C:T	lead	10	71559723	10:71560033:C:T	0.906709	MCU	MCU	4
90		rs2642608	10:71559723:C:T	lead	10	71559723	10:71560956:A:C	0.835723	MCU	MCU	4
90		rs2642608	10:71559723:C:T	lead	10	71559723	10:71563758:C:G	0.840238	MCU	MCU	4
90		rs2642608	10:71559723:C:T	lead	10	71559723	10:71564500:C:T	0.910278	MCU	MCU	5
91	ZMIZ1	rs1769758	10:80898969:G:T	lead	10	80898969	10:80897384:C:T	0.898196	LINC00856;ZMIZ1-AS1;DLG5	LINC00856	2b
91		rs1769758	10:80898969:G:T	lead	10	80898969	10:80898969:G:T	1	LINC00856;ZMIZ1-AS1;DLG5	LINC00856	2b
91		rs1769758	10:80898969:G:T	lead	10	80898969	10:80897515:A:G	0.948962	LINC00856;ZMIZ1-AS1;DLG5	LINC00856	4
91		rs10824756	10:81178171:C:T	conditional	10	81178171	10:81180962:C:T	0.97649	ZCCHC24;TMEM254	ZCCHC24	1f
91		rs10824756	10:81178171:C:T	conditional	10	81178171	10:81184520:C:T	0.911393	ZCCHC24;TMEM254	ZCCHC24	2b
91		rs10824756	10:81178171:C:T	conditional	10	81178171	10:81182802:A:G	0.97649	ZCCHC24;TMEM254	ZCCHC24	3a
91		rs10824756	10:81178171:C:T	conditional	10	81178171	10:81178171:C:T	1	ZCCHC24;TMEM254	ZCCHC24	5
91		rs10824756	10:81178171:C:T	conditional	10	81178171	10:81180767:C:T	0.98042	ZCCHC24;TMEM254	ZCCHC24	5
91		rs10824756	10:81178171:C:T	conditional	10	81178171	10:81181099:C:T	0.97649	ZCCHC24;TMEM254	ZCCHC24	5
92	U3	rs117443987	10:88509088:A:T	lead	10	88509088	10:88535494:D:I	0.812545	CH25H;FLJ37201;MIR107;LIPM	CH25H	4
92		rs117443987	10:88509088:A:T	lead	10	88509088	10:88526921:A:C	0.805995	CH25H;FLJ37201;MIR107;LIPM	CH25H	5
92		rs117443987	10:88509088:A:T	lead	10	88509088	10:88532176:C:T	0.812545	CH25H;FLJ37201;MIR107;LIPM	CH25H	5
93	ADRB1	rs67234920	10:115782061:A:G	lead	10	115782061	10:115782271:A:G	0.993009	PLEKHS1;NHLRC2;DCLRE1A;CCDC186;ADRB1;MIR4295;ABLIM1;TDRD1;TRUB1;ATRNL1;CASP7	PLEKHS1	5
93		rs67234920	10:115782061:A:G	lead	10	115782061	10:115782367:C:T	0.994411	PLEKHS1;NHLRC2;DCLRE1A;CCDC186;ADRB1;MIR4295;ABLIM1;TDRD1;TRUB1;ATRNL1;CASP7	PLEKHS1	5
93		rs67234920	10:115782061:A:G	lead	10	115782061	10:115782368:A:G	0.993017	PLEKHS1;NHLRC2;DCLRE1A;CCDC186;ADRB1;MIR4295;ABLIM1;TDRD1;TRUB1;ATRNL1;CASP7	PLEKHS1	5
93		rs67234920	10:115782061:A:G	lead	10	115782061	10:115782424:C:G	0.994411	PLEKHS1;NHLRC2;DCLRE1A;CCDC186;ADRB1;MIR4295;ABLIM1;TDRD1;TRUB1;ATRNL1;CASP7	PLEKHS1	5
93		rs67234920	10:115782061:A:G	lead	10	115782061	10:115783832:C:T	0.994411	PLEKHS1;NHLRC2;DCLRE1A;CCDC186;ADRB1;MIR4295;ABLIM1;TDRD1;TRUB1;ATRNL1;CASP7	PLEKHS1	5
93		rs67234920	10:115782061:A:G	lead	10	115782061	10:115783950:A:G	0.983242	PLEKHS1;NHLRC2;DCLRE1A;CCDC186;ADRB1;MIR4295;ABLIM1;TDRD1;TRUB1;ATRNL1;CASP7	PLEKHS1	5
94	FGFR2	rs2912774	10:123348662:G:T	lead	10	123348662	10:123353869:C:T	0.912762	OAT;C10orf120;IKZF5;FGFR2;INPP5F;DMBT1;TACC2	OAT	3a
94		rs2912774	10:123348662:G:T	lead	10	123348662	10:123348662:G:T	1	OAT;C10orf120;IKZF5;FGFR2;INPP5F;DMBT1;TACC2	OAT	5
94		rs2912774	10:123348662:G:T	lead	10	123348662	10:123348902:C:T	0.981413	OAT;C10orf120;IKZF5;FGFR2;INPP5F;DMBT1;TACC2	OAT	5
94		rs2912774	10:123348662:G:T	lead	10	123348662	10:123350216:A:C	0.970457	OAT;C10orf120;IKZF5;FGFR2;INPP5F;DMBT1;TACC2	OAT	5
94		rs2912774	10:123348662:G:T	lead	10	123348662	10:123350523:A:G	0.846593	OAT;C10orf120;IKZF5;FGFR2;INPP5F;DMBT1;TACC2	OAT	5
94		rs2912774	10:123348662:G:T	lead	10	123348662	10:123351302:A:G	0.914464	OAT;C10orf120;IKZF5;FGFR2;INPP5F;DMBT1;TACC2	OAT	5
94		rs2912774	10:123348662:G:T	lead	10	123348662	10:123351324:C:T	0.897268	OAT;C10orf120;IKZF5;FGFR2;INPP5F;DMBT1;TACC2	OAT	5
94		rs2912774	10:123348662:G:T	lead	10	123348662	10:123352136:C:T	0.875844	OAT;C10orf120;IKZF5;FGFR2;INPP5F;DMBT1;TACC2	OAT	5
95	MPPED2	rs553951	11:30432176:C:T	lead	11	30432176	11:30429759:G:T	0.997655	MPPED2;EIF3M;RCN1;ARL14EP;LINC00678;KCNA4;METTL15;CSTF3;CCDC73;MIR610	MPPED2	5
99	USP28	rs144789148	11:113666335:A:G	lead	11	113666335	11:113696596:D:I	0.802011	NNMT;PTS	NNMT	5
101	SSPN	rs78518764	12:26306484:C:T	lead	12	26306484	12:26306484:C:T	1	ITPR2;INTS13;SSPN;STK38L;LMNTD1;REP15;KRAS;BHLHE41;BCAT1;PPFIBP1;LRMP;C12orf71	ITPR2	3a
102	ARID2	rs76611452	12:46209520:C:T	lead	12	46209520	12:46300100:C:T	0.962564	RNY5;ASB8;ARID2;LINC00938;SLC38A2;ANO6;SENP1;RAPGEF3;COL2A1;OR8S1;PCED1B	RNY5	2c
102		rs76611452	12:46209520:C:T	lead	12	46209520	12:46209520:C:T	1	ARID2;ANO6;RNY5;CCDC184;LINC00938;TEX49;TWF1;OR8S1	RNY5	5
103	SRGAP1	rs17099893	12:64283014:A:G	lead	12	64283014	12:64283014:A:G	1	XPOT;C12orf66;C12orf56;MON2;LEMD3;SRGAP1;PPM1H;TBK1;TMEM5;MIRLET7I;LINC01465;GRIP1;HMGA2;GNS	XPOT	4
103		rs17099893	12:64283014:A:G	lead	12	64283014	12:64287950:C:T	0.951364	XPOT;C12orf66;C12orf56;MON2;LEMD3;SRGAP1;PPM1H;TBK1;TMEM5;MIRLET7I;LINC01465;GRIP1;HMGA2;GNS	XPOT	4
103		rs17099893	12:64283014:A:G	lead	12	64283014	12:64274616:G:T	0.968127	MON2;C12orf66	XPOT	5
103		rs17099893	12:64283014:A:G	lead	12	64283014	12:64284283:A:G	0.911566	XPOT;C12orf66;C12orf56;MON2;LEMD3;SRGAP1;PPM1H;TBK1;TMEM5;MIRLET7I;LINC01465;GRIP1;HMGA2;GNS	XPOT	5
103		rs10784418	12:65042887:C:T	conditional	12	65042887	12:65054758:A:C	0.964812	FAM19A2;MON2;RASSF3;MIRLET7I;LLPH;TMBIM4;PPM1H;DYRK2;CAND1;LINC01465	FAM19A2	2b
103		rs10784418	12:65042887:C:T	conditional	12	65042887	12:65044814:G:T	1	FAM19A2;MON2;RASSF3;MIRLET7I;LLPH;TMBIM4;PPM1H;DYRK2;CAND1;LINC01465	FAM19A2	3a
103		rs10784418	12:65042887:C:T	conditional	12	65042887	12:65075332:G:T	0.917041	FAM19A2;MON2;RASSF3;MIRLET7I;LLPH;TMBIM4;PPM1H;DYRK2;CAND1;LINC01465	FAM19A2	3a
103		rs10784418	12:65042887:C:T	conditional	12	65042887	12:65012824:C:T	0.920363	LINC01465;LLPH;CAND1;DYRK2;MIRLET7I	FAM19A2	4
103		rs10784418	12:65042887:C:T	conditional	12	65042887	12:65017844:G:T	0.931986	LINC01465;LLPH;CAND1;DYRK2;MIRLET7I	FAM19A2	4
103		rs10784418	12:65042887:C:T	conditional	12	65042887	12:65019723:G:T	0.931986	LINC01465;LLPH;CAND1;DYRK2;MIRLET7I	FAM19A2	4
103		rs10784418	12:65042887:C:T	conditional	12	65042887	12:65049191:A:G	0.977987	FAM19A2;MON2;RASSF3;MIRLET7I;LLPH;TMBIM4;PPM1H;DYRK2;CAND1;LINC01465	FAM19A2	4
103		rs10784418	12:65042887:C:T	conditional	12	65042887	12:65050154:A:G	0.973515	FAM19A2;MON2;RASSF3;MIRLET7I;LLPH;TMBIM4;PPM1H;DYRK2;CAND1;LINC01465	FAM19A2	4
103		rs10784418	12:65042887:C:T	conditional	12	65042887	12:65051920:C:T	0.969302	FAM19A2;MON2;RASSF3;MIRLET7I;LLPH;TMBIM4;PPM1H;DYRK2;CAND1;LINC01465	FAM19A2	4
103		rs10784418	12:65042887:C:T	conditional	12	65042887	12:65060288:C:G	0.969302	FAM19A2;MON2;RASSF3;MIRLET7I;LLPH;TMBIM4;PPM1H;DYRK2;CAND1;LINC01465	FAM19A2	4
103		rs10784418	12:65042887:C:T	conditional	12	65042887	12:65060364:A:G	0.969302	FAM19A2;MON2;RASSF3;MIRLET7I;LLPH;TMBIM4;PPM1H;DYRK2;CAND1;LINC01465	FAM19A2	4
103		rs10784418	12:65042887:C:T	conditional	12	65042887	12:65065169:C:T	0.964812	FAM19A2;MON2;RASSF3;MIRLET7I;LLPH;TMBIM4;PPM1H;DYRK2;CAND1;LINC01465	FAM19A2	4
103		rs10784418	12:65042887:C:T	conditional	12	65042887	12:65065191:C:T	0.969302	FAM19A2;MON2;RASSF3;MIRLET7I;LLPH;TMBIM4;PPM1H;DYRK2;CAND1;LINC01465	FAM19A2	4
103		rs10784418	12:65042887:C:T	conditional	12	65042887	12:65066245:A:T	0.964812	FAM19A2;MON2;RASSF3;MIRLET7I;LLPH;TMBIM4;PPM1H;DYRK2;CAND1;LINC01465	FAM19A2	4
103		rs10784418	12:65042887:C:T	conditional	12	65042887	12:65076498:G:T	0.917041	FAM19A2;MON2;RASSF3;MIRLET7I;LLPH;TMBIM4;PPM1H;DYRK2;CAND1;LINC01465	FAM19A2	4
103		rs10784418	12:65042887:C:T	conditional	12	65042887	12:65017698:A:G	0.931986	LINC01465;LLPH;CAND1;DYRK2;MIRLET7I	FAM19A2	5
103		rs10784418	12:65042887:C:T	conditional	12	65042887	12:65026342:A:G	0.922586	LINC01465;LLPH;CAND1;DYRK2;MIRLET7I	FAM19A2	5
103		rs10784418	12:65042887:C:T	conditional	12	65042887	12:65042049:C:T	1	FAM19A2;MON2;RASSF3;MIRLET7I;LLPH;TMBIM4;PPM1H;DYRK2;CAND1;LINC01465	FAM19A2	5
103		rs10784418	12:65042887:C:T	conditional	12	65042887	12:65043403:A:G	1	FAM19A2;MON2;RASSF3;MIRLET7I;LLPH;TMBIM4;PPM1H;DYRK2;CAND1;LINC01465	FAM19A2	5
103		rs10784418	12:65042887:C:T	conditional	12	65042887	12:65052710:C:T	0.969302	FAM19A2;MON2;RASSF3;MIRLET7I;LLPH;TMBIM4;PPM1H;DYRK2;CAND1;LINC01465	FAM19A2	5
103		rs10784418	12:65042887:C:T	conditional	12	65042887	12:65055057:C:T	0.960493	FAM19A2;MON2;RASSF3;MIRLET7I;LLPH;TMBIM4;PPM1H;DYRK2;CAND1;LINC01465	FAM19A2	5
103		rs10784418	12:65042887:C:T	conditional	12	65042887	12:65055909:A:C	0.964812	FAM19A2;MON2;RASSF3;MIRLET7I;LLPH;TMBIM4;PPM1H;DYRK2;CAND1;LINC01465	FAM19A2	5
103		rs10784418	12:65042887:C:T	conditional	12	65042887	12:65056231:A:T	0.969302	FAM19A2;MON2;RASSF3;MIRLET7I;LLPH;TMBIM4;PPM1H;DYRK2;CAND1;LINC01465	FAM19A2	5
103		rs10784418	12:65042887:C:T	conditional	12	65042887	12:65061265:C:T	0.964812	FAM19A2;MON2;RASSF3;MIRLET7I;LLPH;TMBIM4;PPM1H;DYRK2;CAND1;LINC01465	FAM19A2	5
103		rs10784418	12:65042887:C:T	conditional	12	65042887	12:65068811:A:G	0.951986	FAM19A2;MON2;RASSF3;MIRLET7I;LLPH;TMBIM4;PPM1H;DYRK2;CAND1;LINC01465	FAM19A2	5
103		rs10784418	12:65042887:C:T	conditional	12	65042887	12:65068834:C:G	0.947289	FAM19A2;MON2;RASSF3;MIRLET7I;LLPH;TMBIM4;PPM1H;DYRK2;CAND1;LINC01465	FAM19A2	5
103		rs10784418	12:65042887:C:T	conditional	12	65042887	12:65072628:A:G	0.951364	FAM19A2;MON2;RASSF3;MIRLET7I;LLPH;TMBIM4;PPM1H;DYRK2;CAND1;LINC01465	FAM19A2	5
104	MIR6074	rs4026608	12:66394664:C:T	lead	12	66394664	12:66404624:C:T	0.969526	LINC02389;WIF1;LEMD3;TBC1D30;MSRB3;CPM;AVPR1A;XPOT;TMEM5	LINC02389	5
104		rs4026608	12:66394664:C:T	lead	12	66394664	12:66409705:C:G	0.909955	LINC02389;WIF1;LEMD3;TBC1D30;MSRB3;CPM;AVPR1A;XPOT;TMEM5	LINC02389	5
104		rs4026608	12:66394664:C:T	lead	12	66394664	12:66409715:A:C	0.916233	LINC02389;WIF1;LEMD3;TBC1D30;MSRB3;CPM;AVPR1A;XPOT;TMEM5	LINC02389	5
104		rs4026608	12:66394664:C:T	lead	12	66394664	12:66412130:A:G	0.839763	LINC02389;WIF1;LEMD3;TBC1D30;MSRB3;CPM;AVPR1A;XPOT;TMEM5	LINC02389	5
106	HCFC2	rs2629745	12:104503806:A:G	lead	12	104503806	12:104503806:A:G	1	C12orf45;ALDH1L2;TXNRD1;TTC41P;WASHC3;ARL1;SLC41A2	C12orf45	5
107	RIC8B	rs3759310	12:107166122:C:G	lead	12	107166122	12:107065258:A:G	0.800566	RIC8B;NT5DC3;TXNRD1;TMEM263	RIC8B	3a
107		rs3759310	12:107166122:C:G	lead	12	107166122	12:107129474:D:I	0.921031	RIC8B;BTBD11	RIC8B	3a
107		rs3759310	12:107166122:C:G	lead	12	107166122	12:107090616:C:T	0.800417	RIC8B;PWP1;CRY1;MIR3922;SART3;RFX4	RIC8B	4
107		rs3759310	12:107166122:C:G	lead	12	107166122	12:107162965:A:G	0.851288	RIC8B;POLR3B;C12orf45;RFX4;NT5DC3;TTC41P;TMEM263;C12orf75;CKAP4	RIC8B	4
107		rs3759310	12:107166122:C:G	lead	12	107166122	12:107184363:G:T	0.845763	RIC8B;POLR3B;C12orf45;RFX4;NT5DC3;TTC41P;TMEM263;C12orf75;CKAP4	RIC8B	4
107		rs3759310	12:107166122:C:G	lead	12	107166122	12:107205413:C:T	0.838843	RIC8B;LOC100505978;APPL2;POLR3B;RFX4;TXNRD1;C12orf75;TMEM263;SVOP;CMKLR1;UBE3B;KCTD10;SELPLG;TTC41P;CKAP4;C12orf45;SSH1;WASHC4	RIC8B	4
107		rs3759310	12:107166122:C:G	lead	12	107166122	12:107239947:A:G	0.929325	RIC8B;LOC100505978;APPL2;POLR3B;RFX4;TXNRD1;C12orf75;TMEM263;SVOP;CMKLR1;UBE3B;KCTD10;SELPLG;TTC41P;CKAP4;C12orf45;SSH1;WASHC4	RIC8B	4
107		rs3759310	12:107166122:C:G	lead	12	107166122	12:107070425:A:T	0.910752	RIC8B;NT5DC3;TXNRD1;TMEM263	RIC8B	5
107		rs3759310	12:107166122:C:G	lead	12	107166122	12:107081599:A:C	0.916774	RIC8B;PWP1;CRY1;MIR3922;SART3;RFX4	RIC8B	5
107		rs3759310	12:107166122:C:G	lead	12	107166122	12:107090201:C:T	0.90625	RIC8B;PWP1;CRY1;MIR3922;SART3;RFX4	RIC8B	5
107		rs3759310	12:107166122:C:G	lead	12	107166122	12:107092299:A:G	0.939517	RIC8B;PWP1;CRY1;MIR3922;SART3;RFX4	RIC8B	5
107		rs3759310	12:107166122:C:G	lead	12	107166122	12:107117521:A:G	0.828715	RIC8B;PWP1;CRY1;MIR3922;SART3;RFX4	RIC8B	5
107		rs3759310	12:107166122:C:G	lead	12	107166122	12:107129108:A:G	0.978144	RIC8B;BTBD11	RIC8B	5
107		rs3759310	12:107166122:C:G	lead	12	107166122	12:107158887:D:I	0.870794	RIC8B;BTBD11	RIC8B	5
107		rs3759310	12:107166122:C:G	lead	12	107166122	12:107160169:A:G	0.872684	RIC8B;POLR3B;C12orf45;RFX4;NT5DC3;TTC41P;TMEM263;C12orf75;CKAP4	RIC8B	5
107		rs3759310	12:107166122:C:G	lead	12	107166122	12:107165669:C:T	0.859681	RIC8B;POLR3B;C12orf45;RFX4;NT5DC3;TTC41P;TMEM263;C12orf75;CKAP4	RIC8B	5
107		rs3759310	12:107166122:C:G	lead	12	107166122	12:107198611:A:G	0.978131	RIC8B;POLR3B;C12orf45;RFX4;NT5DC3;TTC41P;TMEM263;C12orf75;CKAP4	RIC8B	5
108	UBE3B	rs2004359	12:109976893:G:T	lead	12	109976893	12:109896165:C:T	0.850514	UBE3B;SSH1;FAM222A;SELPLG;RIC8B;PPP1CC;CORO1C;FAM222A-AS1;ATXN2;MAPKAPK5-AS1;ASCL4;MYO1H	UBE3B;KCTD10	1b
108		rs2004359	12:109976893:G:T	lead	12	109976893	12:109960962:C:T	0.983192	KCTD10;UBE3B;MYO1H;GLTP;RIC8B;FAM222A-AS1;ARPC3;SART3;TRPV4;TRAFD1;BRAP;WSCD2	UBE3B;KCTD10	1d
108		rs2004359	12:109976893:G:T	lead	12	109976893	12:109993603:A:C	0.975389	KCTD10;UBE3B;MYO1H;GLTP;RIC8B;FAM222A-AS1;ARPC3;SART3;TRPV4;TRAFD1;BRAP;WSCD2	UBE3B;KCTD10	1d
108		rs2004359	12:109976893:G:T	lead	12	109976893	12:109895168:C:G	0.93156	UBE3B;SSH1;FAM222A;SELPLG;RIC8B;PPP1CC;CORO1C;FAM222A-AS1;ATXN2;MAPKAPK5-AS1;ASCL4;MYO1H	UBE3B;KCTD10	1f
108		rs2004359	12:109976893:G:T	lead	12	109976893	12:109898732:A:G	0.850514	UBE3B;SSH1;FAM222A;SELPLG;RIC8B;PPP1CC;CORO1C;FAM222A-AS1;ATXN2;MAPKAPK5-AS1;ASCL4;MYO1H	UBE3B;KCTD10	1f
108		rs2004359	12:109976893:G:T	lead	12	109976893	12:109904318:C:T	0.947858	UBE3B;SSH1;FAM222A;SELPLG;RIC8B;PPP1CC;CORO1C;FAM222A-AS1;ATXN2;MAPKAPK5-AS1;ASCL4;MYO1H	UBE3B;KCTD10	1f
108		rs2004359	12:109976893:G:T	lead	12	109976893	12:109925489:A:G	0.99012	UBE3B;FAM222A-AS1;MYO1H;HECTD4;KCTD10;CMKLR1;GLTP	UBE3B;KCTD10	1f
108		rs2004359	12:109976893:G:T	lead	12	109976893	12:109962795:C:G	0.95009	KCTD10;UBE3B;MYO1H;GLTP;RIC8B;FAM222A-AS1;ARPC3;SART3;TRPV4;TRAFD1;BRAP;WSCD2	UBE3B;KCTD10	1f
108		rs2004359	12:109976893:G:T	lead	12	109976893	12:109965512:C:G	0.979076	KCTD10;UBE3B;MYO1H;GLTP;RIC8B;FAM222A-AS1;ARPC3;SART3;TRPV4;TRAFD1;BRAP;WSCD2	UBE3B;KCTD10	1f
108		rs2004359	12:109976893:G:T	lead	12	109976893	12:109973273:C:T	1	KCTD10;UBE3B;MYO1H;GLTP;RIC8B;FAM222A-AS1;ARPC3;SART3;TRPV4;TRAFD1;BRAP;WSCD2	UBE3B;KCTD10	1f
108		rs2004359	12:109976893:G:T	lead	12	109976893	12:109975211:A:T	0.979076	KCTD10;UBE3B;MYO1H;GLTP;RIC8B;FAM222A-AS1;ARPC3;SART3;TRPV4;TRAFD1;BRAP;WSCD2	UBE3B;KCTD10	1f
108		rs2004359	12:109976893:G:T	lead	12	109976893	12:109980516:C:T	0.984596	KCTD10;UBE3B;MYO1H;GLTP;RIC8B;FAM222A-AS1;ARPC3;SART3;TRPV4;TRAFD1;BRAP;WSCD2	UBE3B;KCTD10	1f
108		rs2004359	12:109976893:G:T	lead	12	109976893	12:109986918:C:G	0.839214	KCTD10;UBE3B;MYO1H;GLTP;RIC8B;FAM222A-AS1;ARPC3;SART3;TRPV4;TRAFD1;BRAP;WSCD2	UBE3B;KCTD10	1f
108		rs2004359	12:109976893:G:T	lead	12	109976893	12:109986935:A:G	0.983902	KCTD10;UBE3B;MYO1H;GLTP;RIC8B;FAM222A-AS1;ARPC3;SART3;TRPV4;TRAFD1;BRAP;WSCD2	UBE3B;KCTD10	1f
108		rs2004359	12:109976893:G:T	lead	12	109976893	12:109987838:A:G	0.980426	KCTD10;UBE3B;MYO1H;GLTP;RIC8B;FAM222A-AS1;ARPC3;SART3;TRPV4;TRAFD1;BRAP;WSCD2	UBE3B;KCTD10	1f
108		rs2004359	12:109976893:G:T	lead	12	109976893	12:109993976:C:G	0.975389	KCTD10;UBE3B;MYO1H;GLTP;RIC8B;FAM222A-AS1;ARPC3;SART3;TRPV4;TRAFD1;BRAP;WSCD2	UBE3B;KCTD10	1f
108		rs2004359	12:109976893:G:T	lead	12	109976893	12:109994870:A:T	0.975389	KCTD10;UBE3B;MYO1H;GLTP;RIC8B;FAM222A-AS1;ARPC3;SART3;TRPV4;TRAFD1;BRAP;WSCD2	UBE3B;KCTD10	1f
108		rs2004359	12:109976893:G:T	lead	12	109976893	12:109995097:A:G	0.975389	KCTD10;UBE3B;MYO1H;GLTP;RIC8B;FAM222A-AS1;ARPC3;SART3;TRPV4;TRAFD1;BRAP;WSCD2	UBE3B;KCTD10	1f
108		rs2004359	12:109976893:G:T	lead	12	109976893	12:109997645:C:G	0.941122	KCTD10;UBE3B;MYO1H;GLTP;RIC8B;FAM222A-AS1;ARPC3;SART3;TRPV4;TRAFD1;BRAP;WSCD2	UBE3B;KCTD10	1f
108		rs2004359	12:109976893:G:T	lead	12	109976893	12:109888158:D:I	0.82539	UBE3B;SSH1;FAM222A;SELPLG;RIC8B;PPP1CC;CORO1C;FAM222A-AS1;ATXN2;MAPKAPK5-AS1;ASCL4;MYO1H	UBE3B;KCTD10	2a
108		rs2004359	12:109976893:G:T	lead	12	109976893	12:109896988:D:I	0.947176	UBE3B;SSH1;FAM222A;SELPLG;RIC8B;PPP1CC;CORO1C;FAM222A-AS1;ATXN2;MAPKAPK5-AS1;ASCL4;MYO1H	UBE3B;KCTD10	4
108		rs2004359	12:109976893:G:T	lead	12	109976893	12:109996343:A:C	0.97397	KCTD10;UBE3B;MYO1H;GLTP;RIC8B;FAM222A-AS1;ARPC3;SART3;TRPV4;TRAFD1;BRAP;WSCD2	UBE3B;KCTD10	4
108		rs2004359	12:109976893:G:T	lead	12	109976893	12:109973979:C:G	0.984596	KCTD10;UBE3B;MYO1H;GLTP;RIC8B;FAM222A-AS1;ARPC3;SART3;TRPV4;TRAFD1;BRAP;WSCD2	UBE3B;KCTD10	5
108		rs2004359	12:109976893:G:T	lead	12	109976893	12:109974931:C:T	0.983902	KCTD10;UBE3B;MYO1H;GLTP;RIC8B;FAM222A-AS1;ARPC3;SART3;TRPV4;TRAFD1;BRAP;WSCD2	UBE3B;KCTD10	5
108		rs2004359	12:109976893:G:T	lead	12	109976893	12:109981184:D:I	0.905448	KCTD10;UBE3B;MYO1H;GLTP;RIC8B;FAM222A-AS1;ARPC3;SART3;TRPV4;TRAFD1;BRAP;WSCD2	UBE3B;KCTD10	5
108		rs2004359	12:109976893:G:T	lead	12	109976893	12:109988891:G:T	0.97763	KCTD10;UBE3B;MYO1H;GLTP;RIC8B;FAM222A-AS1;ARPC3;SART3;TRPV4;TRAFD1;BRAP;WSCD2	UBE3B;KCTD10	5
108		rs2004359	12:109976893:G:T	lead	12	109976893	12:109991050:A:G	0.975509	KCTD10;UBE3B;MYO1H;GLTP;RIC8B;FAM222A-AS1;ARPC3;SART3;TRPV4;TRAFD1;BRAP;WSCD2	UBE3B;KCTD10	5
108		rs2004359	12:109976893:G:T	lead	12	109976893	12:109998097:A:G	0.971155	KCTD10;UBE3B;MYO1H;GLTP;RIC8B;FAM222A-AS1;ARPC3;SART3;TRPV4;TRAFD1;BRAP;WSCD2	UBE3B;KCTD10	5
108		rs2004359	12:109976893:G:T	lead	12	109976893	12:109998591:C:T	0.986617	KCTD10;UBE3B;MYO1H;GLTP;RIC8B;FAM222A-AS1;ARPC3;SART3;TRPV4;TRAFD1;BRAP;WSCD2	UBE3B;KCTD10	5
110	FREM2	rs9634754	13:39261151:G:T	lead	13	39261151	13:39245188:A:T	0.879408	SUPT20H;TRPC4;LINC00547;SERTM1;CSNK1A1L;CCDC169-SOHLH2;COG6;MTRF1;FOXO1	SUPT20H	3a
110		rs9634754	13:39261151:G:T	lead	13	39261151	13:39256023:C:T	0.959187	SUPT20H;TRPC4;LINC00547;SERTM1;CSNK1A1L;CCDC169-SOHLH2;COG6;MTRF1;FOXO1	SUPT20H	3a
110		rs9634754	13:39261151:G:T	lead	13	39261151	13:39260130:A:G	0.911535	SUPT20H;TRPC4;LINC00547;SERTM1;CSNK1A1L;CCDC169-SOHLH2;COG6;MTRF1;FOXO1	SUPT20H	3a
110		rs9634754	13:39261151:G:T	lead	13	39261151	13:39261151:G:T	1	SUPT20H;TRPC4;LINC00547;SERTM1;CSNK1A1L;CCDC169-SOHLH2;COG6;MTRF1;FOXO1	SUPT20H	4
110		rs9634754	13:39261151:G:T	lead	13	39261151	13:39238669:C:T	0.876249	TRPC4;FREM2;CSNK1A1L;SPART-AS1	SUPT20H	5
110		rs9634754	13:39261151:G:T	lead	13	39261151	13:39242025:A:T	0.857385	SUPT20H;TRPC4;LINC00547;SERTM1;CSNK1A1L;CCDC169-SOHLH2;COG6;MTRF1;FOXO1	SUPT20H	5
110		rs9634754	13:39261151:G:T	lead	13	39261151	13:39255703:D:I	0.997334	SUPT20H;TRPC4;LINC00547;SERTM1;CSNK1A1L;CCDC169-SOHLH2;COG6;MTRF1;FOXO1	SUPT20H	5
111	FGF14	rs9513995	13:102878269:C:T	lead	13	102878269	13:102888367:C:T	0.86208	MIR4705;FGF14;FGF14-IT1;TPP2;MIR548AS;GPR183;MIR2681;NALCN	MIR4705	3a
111		rs9513995	13:102878269:C:T	lead	13	102878269	13:102891966:A:T	0.86224	MIR4705;FGF14;FGF14-IT1;TPP2;MIR548AS;GPR183;MIR2681;NALCN	MIR4705	3a
111		rs9513995	13:102878269:C:T	lead	13	102878269	13:102872104:A:G	0.813132	FGF14;FGF14-IT1;MIR4705;MIR2681;SLC10A2	MIR4705	5
111		rs9513995	13:102878269:C:T	lead	13	102878269	13:102880121:A:G	0.866052	MIR4705;FGF14;FGF14-IT1;TPP2;MIR548AS;GPR183;MIR2681;NALCN	MIR4705	5
111		rs9513995	13:102878269:C:T	lead	13	102878269	13:102882436:D:I	0.848556	MIR4705;FGF14;FGF14-IT1;TPP2;MIR548AS;GPR183;MIR2681;NALCN	MIR4705	5
111		rs9513995	13:102878269:C:T	lead	13	102878269	13:102884015:A:G	0.867328	MIR4705;FGF14;FGF14-IT1;TPP2;MIR548AS;GPR183;MIR2681;NALCN	MIR4705	5
112	ARHGEF40	rs12885183	14:21545230:A:G	lead	14	21545230	14:21553545:A:T	0.858649	NDRG2;TTC5;OSGEP	NDRG2	2c
112		rs12885183	14:21545230:A:G	lead	14	21545230	14:21544274:C:T	0.849183	NDRG2;TTC5;OSGEP	NDRG2	5
112		rs12885183	14:21545230:A:G	lead	14	21545230	14:21548158:A:G	0.867075	NDRG2;TTC5;OSGEP	NDRG2	5
114	AKAP6	rs3784192	14:32923336:A:G	lead	14	32923336	14:32923336:A:G	1	GPR33;AKAP6;HEATR5A;DTD2;LOC100506071;NUBPL;ARHGAP5-AS1;SPTSSA;PPP2R3C	GPR33	2b
114		rs3784192	14:32923336:A:G	lead	14	32923336	14:32923626:C:T	0.969188	GPR33;AKAP6;HEATR5A;DTD2;LOC100506071;NUBPL;ARHGAP5-AS1;SPTSSA;PPP2R3C	GPR33	2b
114		rs3784192	14:32923336:A:G	lead	14	32923336	14:32923677:C:T	0.96975	GPR33;AKAP6;HEATR5A;DTD2;LOC100506071;NUBPL;ARHGAP5-AS1;SPTSSA;PPP2R3C	GPR33	3a
114		rs3784192	14:32923336:A:G	lead	14	32923336	14:32923441:A:T	0.863699	GPR33;AKAP6;HEATR5A;DTD2;LOC100506071;NUBPL;ARHGAP5-AS1;SPTSSA;PPP2R3C	GPR33	4
114		rs3784192	14:32923336:A:G	lead	14	32923336	14:32926953:G:T	0.890586	GPR33;AKAP6;HEATR5A;DTD2;LOC100506071;NUBPL;ARHGAP5-AS1;SPTSSA;PPP2R3C	GPR33	4
114		rs3784192	14:32923336:A:G	lead	14	32923336	14:32908548:A:G	0.825374	AKAP6;GPR33;ARHGAP5-AS1;DTD2;HEATR5A;NUBPL;LOC100506071;HECTD1	GPR33	5
114		rs3784192	14:32923336:A:G	lead	14	32923336	14:32923080:C:T	0.849704	GPR33;AKAP6;HEATR5A;DTD2;LOC100506071;NUBPL;ARHGAP5-AS1;SPTSSA;PPP2R3C	GPR33	5
115	NFKBIA	rs8904	14:35871217:A:G	lead	14	35871217	14:35871093:C:T	0.968533	FAM177A1	FAM177A1	4
115		rs8904	14:35871217:A:G	lead	14	35871217	14:35871217:A:G	1	FAM177A1	FAM177A1	4
116	SYNE2	rs1255908	14:64457638:G:T	lead	14	64457638	14:64458960:D:I	0.833317	ESR2;SYNE2;PRKCH	ESR2	3a
116		rs1255908	14:64457638:G:T	lead	14	64457638	14:64404187:A:T	0.803649	SYNE2;PPP1R36;HIF1A-AS2;MTHFD1;HIF1A;GPHN;LINC00643	ESR2	4
116		rs1255908	14:64457638:G:T	lead	14	64457638	14:64408135:A:C	0.804115	SYNE2;PPP1R36;HIF1A-AS2;MTHFD1;HIF1A;GPHN;LINC00643	ESR2	5
116		rs1255908	14:64457638:G:T	lead	14	64457638	14:64423187:A:C	0.808596	SYNE2;PPP1R36;HIF1A-AS2;MTHFD1;HIF1A;GPHN;LINC00643	ESR2	5
116		rs1255908	14:64457638:G:T	lead	14	64457638	14:64425415:C:G	0.800611	SYNE2;PPP1R36;HIF1A-AS2;MTHFD1;HIF1A;GPHN;LINC00643	ESR2	5
116		rs1255908	14:64457638:G:T	lead	14	64457638	14:64425499:D:I	0.839234	SYNE2;PPP1R36;HIF1A-AS2;MTHFD1;HIF1A;GPHN;LINC00643	ESR2	5
116		rs1255908	14:64457638:G:T	lead	14	64457638	14:64430267:G:T	0.876239	SYNE2;PPP1R36;HIF1A-AS2;MTHFD1;HIF1A;GPHN;LINC00643	ESR2	5
116		rs1255908	14:64457638:G:T	lead	14	64457638	14:64433941:C:T	0.84786	SYNE2;PPP1R36;HIF1A-AS2;MTHFD1;HIF1A;GPHN;LINC00643	ESR2	5
116		rs1255908	14:64457638:G:T	lead	14	64457638	14:64444876:A:G	0.947157	ESR2;SYNE2;PRKCH	ESR2	5
116		rs1255908	14:64457638:G:T	lead	14	64457638	14:64448080:D:I	0.950822	ESR2;SYNE2;PRKCH	ESR2	5
116		rs1255908	14:64457638:G:T	lead	14	64457638	14:64469270:G:T	0.824957	ESR2;SYNE2;PRKCH	ESR2	5
116		rs1255908	14:64457638:G:T	lead	14	64457638	14:64474121:C:T	0.816885	ESR2;SYNE2;PRKCH	ESR2	5
117	FLRT2	rs17712080	14:86041160:A:G	lead	14	86041160	14:86033518:D:I	0.936754	LINC00911;LINC01148;FLRT2	LINC00911;LINC01148	5
117		rs17712080	14:86041160:A:G	lead	14	86041160	14:86041160:A:G	1	LINC01148;LINC00911	LINC00911;LINC01148	5
117		rs17712080	14:86041160:A:G	lead	14	86041160	14:86044090:A:C	0.94057	LINC01148;LINC00911	LINC00911;LINC01148	5
117		rs17712080	14:86041160:A:G	lead	14	86041160	14:86045291:A:T	0.844007	LINC01148;LINC00911	LINC00911;LINC01148	5
117		rs17712080	14:86041160:A:G	lead	14	86041160	14:86045620:C:T	0.81098	LINC01148;LINC00911	LINC00911;LINC01148	5
118	RP11-1070N10.3	rs179145	14:95983975:A:G	lead	14	95983975	14:95983975:A:G	1	DICER1;ATG2B;AK7	DICER1	4
119	MARK3	rs3759579	14:103851272:A:G	lead	14	103851272	14:103851272:A:G	1	MARK3;EIF5;RCOR1;PPP2R5C;XRCC3;LINC00605;TRAF3;ZNF839;TNFAIP2;TDRD9	MARK3	4
120	RBPMS2	rs3935716	15:65035979:A:G	lead	15	65035979	15:64736287:C:T	0.887929	OAZ2;ANKDD1A;CLPX;CSNK1G1;RPS27L;SPG21	OAZ2;ANKDD1A;TLN2	1f
120		rs3935716	15:65035979:A:G	lead	15	65035979	15:64856394:C:T	0.892322	OAZ2;CSNK1G1;SPG21;SNX1;APH1B;VPS13C	OAZ2;ANKDD1A;TLN2	1f
120		rs3935716	15:65035979:A:G	lead	15	65035979	15:64965815:G:T	0.912819	ANKDD1A;USP3;SNX1;CSNK1G1;MTFMT;PPIB;KBTBD13;SPG21	OAZ2;ANKDD1A;TLN2	1f
120		rs3935716	15:65035979:A:G	lead	15	65035979	15:65040928:C:T	0.830405	TLN2;PDCD7	OAZ2;ANKDD1A;TLN2	1f
120		rs3935716	15:65035979:A:G	lead	15	65035979	15:65055182:C:G	0.971795	TLN2;PDCD7	OAZ2;ANKDD1A;TLN2	1f
120		rs3935716	15:65035979:A:G	lead	15	65035979	15:65059651:C:T	0.960465	TLN2;PDCD7	OAZ2;ANKDD1A;TLN2	1f
120		rs3935716	15:65035979:A:G	lead	15	65035979	15:64854511:A:G	0.896225	OAZ2;CSNK1G1;SPG21;SNX1;APH1B;VPS13C	OAZ2;ANKDD1A;TLN2	2c
120		rs3935716	15:65035979:A:G	lead	15	65035979	15:64736206:D:I	0.887929	OAZ2;ANKDD1A;CLPX;CSNK1G1;RPS27L;SPG21	OAZ2;ANKDD1A;TLN2	3a
120		rs3935716	15:65035979:A:G	lead	15	65035979	15:64814727:C:G	0.893049	ANKDD1A;USP3-AS1;USP3;SPG21	OAZ2;ANKDD1A;TLN2	3a
120		rs3935716	15:65035979:A:G	lead	15	65035979	15:64850939:D:I	0.889396	OAZ2;CSNK1G1;SPG21;SNX1;APH1B;VPS13C	OAZ2;ANKDD1A;TLN2	3a
120		rs3935716	15:65035979:A:G	lead	15	65035979	15:65018526:C:T	0.926753	OAZ2;ANKDD1A;PDCD7;LACTB;SPG21	OAZ2;ANKDD1A;TLN2	3a
120		rs3935716	15:65035979:A:G	lead	15	65035979	15:64756886:D:I	0.816407	OAZ2;ANKDD1A;CLPX;CSNK1G1;RPS27L;SPG21	OAZ2;ANKDD1A;TLN2	4
120		rs3935716	15:65035979:A:G	lead	15	65035979	15:64851132:C:T	0.891071	OAZ2;CSNK1G1;SPG21;SNX1;APH1B;VPS13C	OAZ2;ANKDD1A;TLN2	4
120		rs3935716	15:65035979:A:G	lead	15	65035979	15:64975763:C:G	0.916117	ANKDD1A;USP3;SNX1;CSNK1G1;MTFMT;PPIB;KBTBD13;SPG21	OAZ2;ANKDD1A;TLN2	4
120		rs3935716	15:65035979:A:G	lead	15	65035979	15:64978552:D:I	0.922711	ANKDD1A;USP3;SNX1;CSNK1G1;MTFMT;PPIB;KBTBD13;SPG21	OAZ2;ANKDD1A;TLN2	4
120		rs3935716	15:65035979:A:G	lead	15	65035979	15:64979291:C:G	0.820907	ANKDD1A;USP3;SNX1;CSNK1G1;MTFMT;PPIB;KBTBD13;SPG21	OAZ2;ANKDD1A;TLN2	4
120		rs3935716	15:65035979:A:G	lead	15	65035979	15:64995737:C:T	0.913645	ANKDD1A;USP3;SNX1;CSNK1G1;MTFMT;PPIB;KBTBD13;SPG21	OAZ2;ANKDD1A;TLN2	4
120		rs3935716	15:65035979:A:G	lead	15	65035979	15:65041622:A:C	0.966615	TLN2;PDCD7	OAZ2;ANKDD1A;TLN2	4
120		rs3935716	15:65035979:A:G	lead	15	65035979	15:64697614:A:G	0.870496	RAB11A	OAZ2;ANKDD1A;TLN2	5
120		rs3935716	15:65035979:A:G	lead	15	65035979	15:64700558:C:G	0.87546	RAB11A	OAZ2;ANKDD1A;TLN2	5
120		rs3935716	15:65035979:A:G	lead	15	65035979	15:64704844:D:I	0.850413	RAB11A	OAZ2;ANKDD1A;TLN2	5
120		rs3935716	15:65035979:A:G	lead	15	65035979	15:64731679:A:G	0.884259	OAZ2;ANKDD1A;CLPX;CSNK1G1;RPS27L;SPG21	OAZ2;ANKDD1A;TLN2	5
120		rs3935716	15:65035979:A:G	lead	15	65035979	15:64735527:A:G	0.888648	OAZ2;ANKDD1A;CLPX;CSNK1G1;RPS27L;SPG21	OAZ2;ANKDD1A;TLN2	5
120		rs3935716	15:65035979:A:G	lead	15	65035979	15:64751162:A:G	0.889664	OAZ2;ANKDD1A;CLPX;CSNK1G1;RPS27L;SPG21	OAZ2;ANKDD1A;TLN2	5
120		rs3935716	15:65035979:A:G	lead	15	65035979	15:64793617:A:G	0.894356	DIS3L;ANKDD1A;C2CD4A	OAZ2;ANKDD1A;TLN2	5
120		rs3935716	15:65035979:A:G	lead	15	65035979	15:64803250:C:T	0.892281	ANKDD1A;USP3-AS1;USP3;SPG21	OAZ2;ANKDD1A;TLN2	5
120		rs3935716	15:65035979:A:G	lead	15	65035979	15:64804862:A:T	0.861433	ANKDD1A;USP3-AS1;USP3;SPG21	OAZ2;ANKDD1A;TLN2	5
120		rs3935716	15:65035979:A:G	lead	15	65035979	15:64829781:A:G	0.812766	ANKDD1A;USP3-AS1;USP3;SPG21	OAZ2;ANKDD1A;TLN2	5
120		rs3935716	15:65035979:A:G	lead	15	65035979	15:64853654:D:I	0.817414	OAZ2;CSNK1G1;SPG21;SNX1;APH1B;VPS13C	OAZ2;ANKDD1A;TLN2	5
120		rs3935716	15:65035979:A:G	lead	15	65035979	15:64857043:C:T	0.892392	OAZ2;CSNK1G1;SPG21;SNX1;APH1B;VPS13C	OAZ2;ANKDD1A;TLN2	5
120		rs3935716	15:65035979:A:G	lead	15	65035979	15:64858492:A:G	0.891733	OAZ2;CSNK1G1;SPG21;SNX1;APH1B;VPS13C	OAZ2;ANKDD1A;TLN2	5
120		rs3935716	15:65035979:A:G	lead	15	65035979	15:64869429:D:I	0.866034	OAZ2;CSNK1G1;SPG21;SNX1;APH1B;VPS13C	OAZ2;ANKDD1A;TLN2	5
120		rs3935716	15:65035979:A:G	lead	15	65035979	15:64872537:A:G	0.893599	OAZ2;CSNK1G1;SPG21;SNX1;APH1B;VPS13C	OAZ2;ANKDD1A;TLN2	5
120		rs3935716	15:65035979:A:G	lead	15	65035979	15:64872545:A:G	0.911469	OAZ2;CSNK1G1;SPG21;SNX1;APH1B;VPS13C	OAZ2;ANKDD1A;TLN2	5
120		rs3935716	15:65035979:A:G	lead	15	65035979	15:64940718:C:T	0.866389	PPIB;RAB8B	OAZ2;ANKDD1A;TLN2	5
120		rs3935716	15:65035979:A:G	lead	15	65035979	15:65008034:C:T	0.829131	OAZ2;ANKDD1A;PDCD7;LACTB;SPG21	OAZ2;ANKDD1A;TLN2	5
120		rs3935716	15:65035979:A:G	lead	15	65035979	15:65035979:A:G	1	OAZ2;ANKDD1A;PDCD7;LACTB;SPG21	OAZ2;ANKDD1A;TLN2	5
120		rs3935716	15:65035979:A:G	lead	15	65035979	15:65039719:C:T	0.939818	OAZ2;ANKDD1A;PDCD7;LACTB;SPG21	OAZ2;ANKDD1A;TLN2	5
120		rs3935716	15:65035979:A:G	lead	15	65035979	15:65040445:G:T	0.979465	TLN2;PDCD7	OAZ2;ANKDD1A;TLN2	5
120		rs3935716	15:65035979:A:G	lead	15	65035979	15:65041044:A:C	0.827687	TLN2;PDCD7	OAZ2;ANKDD1A;TLN2	5
120		rs3935716	15:65035979:A:G	lead	15	65035979	15:65043534:D:I	0.845542	TLN2;PDCD7	OAZ2;ANKDD1A;TLN2	5
120		rs3935716	15:65035979:A:G	lead	15	65035979	15:65048309:A:G	0.963281	TLN2;PDCD7	OAZ2;ANKDD1A;TLN2	5
120		rs3935716	15:65035979:A:G	lead	15	65035979	15:65051190:C:T	0.9767	TLN2;PDCD7	OAZ2;ANKDD1A;TLN2	5
120		rs3935716	15:65035979:A:G	lead	15	65035979	15:65056043:A:G	0.975261	TLN2;PDCD7	OAZ2;ANKDD1A;TLN2	5
120		rs3935716	15:65035979:A:G	lead	15	65035979	15:65060028:C:G	0.959749	TLN2;PDCD7	OAZ2;ANKDD1A;TLN2	5
120		rs3935716	15:65035979:A:G	lead	15	65035979	15:65064585:C:T	0.947327	TLN2;PDCD7	OAZ2;ANKDD1A;TLN2	5
120		rs3935716	15:65035979:A:G	lead	15	65035979	15:65066017:A:G	0.949433	TLN2;PDCD7	OAZ2;ANKDD1A;TLN2	5
121	CORO2B	rs11330601	15:69021265:D:I	lead	15	69021265	15:69021147:C:G	0.865408	MIR548H4;LRRC49	MIR548H4	5
121		rs11330601	15:69021265:D:I	lead	15	69021265	15:69021194:G:T	0.997401	MIR548H4;LRRC49	MIR548H4	5
122	HCN4	rs8039168	15:73664723:A:T	lead	15	73664723	15:73661687:G:T	0.843732	REC114;CD276	REC114	3a
122		rs8039168	15:73664723:A:T	lead	15	73664723	15:73662855:A:G	0.986279	REC114;CD276	REC114	5
122		rs8039168	15:73664723:A:T	lead	15	73664723	15:73663314:A:G	0.995827	REC114;CD276	REC114	5
122		rs8039168	15:73664723:A:T	lead	15	73664723	15:73663632:A:G	0.998608	REC114;CD276	REC114	5
122		rs8039168	15:73664723:A:T	lead	15	73664723	15:73663903:A:T	0.998608	REC114;CD276	REC114	5
122		rs8039168	15:73664723:A:T	lead	15	73664723	15:73664041:A:G	0.899587	REC114;CD276	REC114	5
122		rs8039168	15:73664723:A:T	lead	15	73664723	15:73664310:G:T	0.997217	REC114;CD276	REC114	5
122		rs8039168	15:73664723:A:T	lead	15	73664723	15:73665506:G:T	1	REC114;CD276	REC114	5
123	ALPK3	rs6496452	15:85372645:A:T	lead	15	85372645	15:85372645:A:T	1	SCAND2P;NMB;PDE8A;ALPK3;ZSCAN2;LINC00933;ZNF592;AKAP13;TM6SF1;SAXO2	SCAND2P	1d
123		rs6496452	15:85372645:A:T	lead	15	85372645	15:85363348:A:G	0.85861	SCAND2P;NMB;PDE8A;ALPK3;ZSCAN2;LINC00933;ZNF592;AKAP13;TM6SF1;SAXO2	SCAND2P	1f
123		rs6496452	15:85372645:A:T	lead	15	85372645	15:85371944:G:T	0.927644	SCAND2P;NMB;PDE8A;ALPK3;ZSCAN2;LINC00933;ZNF592;AKAP13;TM6SF1;SAXO2	SCAND2P	1f
123		rs6496452	15:85372645:A:T	lead	15	85372645	15:85361977:G:T	0.9079	SCAND2P;NMB;PDE8A;ALPK3;ZSCAN2;LINC00933;ZNF592;AKAP13;TM6SF1;SAXO2	SCAND2P	3a
123		rs6496452	15:85372645:A:T	lead	15	85372645	15:85361960:C:T	0.858097	SCAND2P;NMB;PDE8A;ALPK3;ZSCAN2;LINC00933;ZNF592;AKAP13;TM6SF1;SAXO2	SCAND2P	4
123		rs6496452	15:85372645:A:T	lead	15	85372645	15:85276935:C:T	0.842661	ALPK3	SCAND2P	5
123		rs6496452	15:85372645:A:T	lead	15	85372645	15:85277888:A:G	0.83191	ALPK3	SCAND2P	5
123		rs6496452	15:85372645:A:T	lead	15	85372645	15:85355113:A:C	0.825151	ALPK3;SEC11A;NMB;PDE8A;LINC00933;LINC00052;AKAP13	SCAND2P	5
123		rs6496452	15:85372645:A:T	lead	15	85372645	15:85355494:C:T	0.828673	ALPK3;SEC11A;NMB;PDE8A;LINC00933;LINC00052;AKAP13	SCAND2P	5
124	LINC00924 - NR2F2	rs62008078	15:96460899:C:T	lead	15	96460899	15:96460899:C:T	1	MIR1469;LINC00924;MIR4714;LOC440311;ARRDC4;LINC01197;IGF1R	MIR1469	2b
124		rs62008078	15:96460899:C:T	lead	15	96460899	15:96460704:C:T	0.997284	MIR1469;LINC00924;MIR4714;LOC440311;ARRDC4;LINC01197;IGF1R	MIR1469	5
124		rs62008078	15:96460899:C:T	lead	15	96460899	15:96464805:C:T	0.871468	MIR1469;LINC00924;MIR4714;LOC440311;ARRDC4;LINC01197;IGF1R	MIR1469	5
126	SRL	rs79321945	16:4282284:A:C	lead	16	4282284	16:4283042:A:G	0.976666	ADCY9	ADCY9	4
126		rs79321945	16:4282284:A:C	lead	16	4282284	16:4281391:G:T	0.995597	ADCY9	ADCY9	5
126		rs79321945	16:4282284:A:C	lead	16	4282284	16:4281666:C:T	0.981013	ADCY9	ADCY9	5
126		rs79321945	16:4282284:A:C	lead	16	4282284	16:4282284:A:C	1	ADCY9	ADCY9	5
127*	MYH11	rs72772025	16:15834729:C:T	lead	16	15834729	16:15834729:C:T	1	ABCC1;PDXDC1;MYH11;MPV17L;MKL2;FOPNL	PDXDC1;ABCC1	5
127		rs72772025	16:15834729:C:T	lead	16	15834729	16:15708256:D:I	0.822058	PDXDC1;MPV17L;MYH11;MKL2;C16orf45;NTAN1;ABCC1	PDXDC1;ABCC1	5
128	LOC101927480 - LINC02140	rs1186818	16:54598337:A:G	lead	16	54598337	16:54600280:A:G	0.970368	RPGRIP1L;CRNDE;IRX5;IRX3;CASC16;FTO;CES5A;CHD9;MT1B;LINC00919	RPGRIP1L	4
128		rs1186818	16:54598337:A:G	lead	16	54598337	16:54598180:A:G	0.973248	IRX5;IRX3;CES5A;FTO;RPGRIP1L;CRNDE;AMFR;DKFZP434H168;IRX6;RBL2;SLC6A2;LPCAT2	RPGRIP1L	5
128		rs1186818	16:54598337:A:G	lead	16	54598337	16:54599272:C:T	0.967249	IRX5;IRX3;CES5A;FTO;RPGRIP1L;CRNDE;AMFR;DKFZP434H168;IRX6;RBL2;SLC6A2;LPCAT2	RPGRIP1L	5
128		rs1186818	16:54598337:A:G	lead	16	54598337	16:54599293:A:G	0.967249	IRX5;IRX3;CES5A;FTO;RPGRIP1L;CRNDE;AMFR;DKFZP434H168;IRX6;RBL2;SLC6A2;LPCAT2	RPGRIP1L	5
128		rs1186818	16:54598337:A:G	lead	16	54598337	16:54599346:A:G	0.970368	IRX5;IRX3;CES5A;FTO;RPGRIP1L;CRNDE;AMFR;DKFZP434H168;IRX6;RBL2;SLC6A2;LPCAT2	RPGRIP1L	5
128		rs1186818	16:54598337:A:G	lead	16	54598337	16:54599642:A:T	0.970368	IRX5;IRX3;CES5A;FTO;RPGRIP1L;CRNDE;AMFR;DKFZP434H168;IRX6;RBL2;SLC6A2;LPCAT2	RPGRIP1L	5
128		rs1186818	16:54598337:A:G	lead	16	54598337	16:54599824:D:I	0.970368	IRX5;IRX3;CES5A;FTO;RPGRIP1L;CRNDE;AMFR;DKFZP434H168;IRX6;RBL2;SLC6A2;LPCAT2	RPGRIP1L	5
128		rs1186818	16:54598337:A:G	lead	16	54598337	16:54600156:A:G	0.970368	RPGRIP1L;CRNDE;IRX5;IRX3;CASC16;FTO;CES5A;CHD9;MT1B;LINC00919	RPGRIP1L	5
129	CNOT1	rs7199856	16:58584772:G:T	lead	16	58584772	16:58597289:C:G	0.993621	SLC38A7;GINS3;PRSS54;CSNK2A2;KIFC3;NUDT21;FAM192A;MT1B;CCDC113;ADGRG1;LPCAT2;POLR2C;CNOT1;BBS2;AMFR	SLC38A7;CNOT1;CSNK2A2	4
129		rs7199856	16:58584772:G:T	lead	16	58584772	16:58597291:A:T	0.993621	SLC38A7;GINS3;PRSS54;CSNK2A2;KIFC3;NUDT21;FAM192A;MT1B;CCDC113;ADGRG1;LPCAT2;POLR2C;CNOT1;BBS2;AMFR	SLC38A7;CNOT1;CSNK2A2	4
129		rs7199856	16:58584772:G:T	lead	16	58584772	16:58637528:C:G	0.995444	CNOT1;CSNK2A2;MT1DP;CCDC113;PRSS54	SLC38A7;CNOT1;CSNK2A2	4
129		rs7199856	16:58584772:G:T	lead	16	58584772	16:58652654:A:G	0.994535	CSNK2A2;CETP;GINS3;CNOT1;KIFC3	SLC38A7;CNOT1;CSNK2A2	4
129		rs7199856	16:58584772:G:T	lead	16	58584772	16:58664065:G:T	0.923627	CSNK2A2;CETP;GINS3;CNOT1;KIFC3	SLC38A7;CNOT1;CSNK2A2	4
129		rs7199856	16:58584772:G:T	lead	16	58584772	16:58567761:A:T	0.993615	SLC38A7;GINS3;PRSS54;CSNK2A2;KIFC3;NUDT21;FAM192A;MT1B;CCDC113;ADGRG1;LPCAT2;POLR2C;CNOT1;BBS2;AMFR	SLC38A7;CNOT1;CSNK2A2	5
129		rs7199856	16:58584772:G:T	lead	16	58584772	16:58571189:C:T	0.998177	SLC38A7;GINS3;PRSS54;CSNK2A2;KIFC3;NUDT21;FAM192A;MT1B;CCDC113;ADGRG1;LPCAT2;POLR2C;CNOT1;BBS2;AMFR	SLC38A7;CNOT1;CSNK2A2	5
129		rs7199856	16:58584772:G:T	lead	16	58584772	16:58577138:A:C	0.998175	SLC38A7;GINS3;PRSS54;CSNK2A2;KIFC3;NUDT21;FAM192A;MT1B;CCDC113;ADGRG1;LPCAT2;POLR2C;CNOT1;BBS2;AMFR	SLC38A7;CNOT1;CSNK2A2	5
129		rs7199856	16:58584772:G:T	lead	16	58584772	16:58579886:C:T	0.999087	SLC38A7;GINS3;PRSS54;CSNK2A2;KIFC3;NUDT21;FAM192A;MT1B;CCDC113;ADGRG1;LPCAT2;POLR2C;CNOT1;BBS2;AMFR	SLC38A7;CNOT1;CSNK2A2	5
129		rs7199856	16:58584772:G:T	lead	16	58584772	16:58616165:C:T	0.997261	CNOT1;CSNK2A2;MT1DP;CCDC113;PRSS54	SLC38A7;CNOT1;CSNK2A2	5
129		rs7199856	16:58584772:G:T	lead	16	58584772	16:58620885:C:T	0.998173	CNOT1;CSNK2A2;MT1DP;CCDC113;PRSS54	SLC38A7;CNOT1;CSNK2A2	5
129		rs7199856	16:58584772:G:T	lead	16	58584772	16:58622178:A:G	0.993628	CNOT1;CSNK2A2;MT1DP;CCDC113;PRSS54	SLC38A7;CNOT1;CSNK2A2	5
129		rs7199856	16:58584772:G:T	lead	16	58584772	16:58622596:D:I	0.995444	CNOT1;CSNK2A2;MT1DP;CCDC113;PRSS54	SLC38A7;CNOT1;CSNK2A2	5
129		rs7199856	16:58584772:G:T	lead	16	58584772	16:58630167:C:T	0.998173	CNOT1;CSNK2A2;MT1DP;CCDC113;PRSS54	SLC38A7;CNOT1;CSNK2A2	5
129		rs7199856	16:58584772:G:T	lead	16	58584772	16:58630414:A:G	0.998173	CNOT1;CSNK2A2;MT1DP;CCDC113;PRSS54	SLC38A7;CNOT1;CSNK2A2	5
129		rs7199856	16:58584772:G:T	lead	16	58584772	16:58634751:A:C	0.995444	CNOT1;CSNK2A2;MT1DP;CCDC113;PRSS54	SLC38A7;CNOT1;CSNK2A2	5
129		rs7199856	16:58584772:G:T	lead	16	58584772	16:58638768:C:T	0.995444	CNOT1;CSNK2A2;MT1DP;CCDC113;PRSS54	SLC38A7;CNOT1;CSNK2A2	5
129		rs7199856	16:58584772:G:T	lead	16	58584772	16:58642571:D:I	0.977671	CSNK2A2;CETP;GINS3;CNOT1;KIFC3	SLC38A7;CNOT1;CSNK2A2	5
129		rs7199856	16:58584772:G:T	lead	16	58584772	16:58645954:D:I	0.993635	CSNK2A2;CETP;GINS3;CNOT1;KIFC3	SLC38A7;CNOT1;CSNK2A2	5
129		rs7199856	16:58584772:G:T	lead	16	58584772	16:58646004:C:T	0.993635	CSNK2A2;CETP;GINS3;CNOT1;KIFC3	SLC38A7;CNOT1;CSNK2A2	5
129		rs7199856	16:58584772:G:T	lead	16	58584772	16:58655356:C:T	0.993616	CSNK2A2;CETP;GINS3;CNOT1;KIFC3	SLC38A7;CNOT1;CSNK2A2	5
129		rs7199856	16:58584772:G:T	lead	16	58584772	16:58661456:C:T	0.990902	CSNK2A2;CETP;GINS3;CNOT1;KIFC3	SLC38A7;CNOT1;CSNK2A2	5
129		rs7199856	16:58584772:G:T	lead	16	58584772	16:58666389:A:G	0.985434	CSNK2A2;CETP;GINS3;CNOT1;KIFC3	SLC38A7;CNOT1;CSNK2A2	5
130	LINC01082 - IRF8	rs13336880	16:86122524:A:G	conditional	16	86122524	16:86122524:A:G	1	FLJ30679	FLJ30679	5
130		rs13336880	16:86122524:A:G	conditional	16	86122524	16:86122195:D:I	0.980419	FLJ30679	FLJ30679	5
130		rs13336880	16:86122524:A:G	conditional	16	86122524	16:86122201:A:G	0.980419	FLJ30679	FLJ30679	5
130		rs13336880	16:86122524:A:G	conditional	16	86122524	16:86122210:C:T	0.980419	FLJ30679	FLJ30679	5
130		rs13336880	16:86122524:A:G	conditional	16	86122524	16:86122622:A:G	0.891535	FLJ30679	FLJ30679	5
133	EFCAB5	rs55866125	17:28312993:C:T	lead	17	28312993	17:28293948:C:G	0.968081	EFCAB5;EVI2A;CRYBA1;CPD;SPAG5-AS1;RAB11FIP4;SEZ6;ANKRD13B;SSH2;SLC6A4;NF1;GOSR1;TMIGD1;PROCA1;KSR1;TEFM;LRRC37B;TMEM98	EFCAB5	1f
133		rs55866125	17:28312993:C:T	lead	17	28312993	17:28296327:G:T	0.968866	EFCAB5;EVI2A;CRYBA1;CPD;SPAG5-AS1;RAB11FIP4;SEZ6;ANKRD13B;SSH2;SLC6A4;NF1;GOSR1;TMIGD1;PROCA1;KSR1;TEFM;LRRC37B;TMEM98	EFCAB5	1f
133		rs55866125	17:28312993:C:T	lead	17	28312993	17:28300144:C:T	0.968866	EFCAB5;EVI2A;CRYBA1;CPD;SPAG5-AS1;RAB11FIP4;SEZ6;ANKRD13B;SSH2;SLC6A4;NF1;GOSR1;TMIGD1;PROCA1;KSR1;TEFM;LRRC37B;TMEM98	EFCAB5	3a
133		rs55866125	17:28312993:C:T	lead	17	28312993	17:28368196:A:G	0.95673	EFCAB5;GOSR1;RAB11FIP4;SPACA3;SLC6A4;ANKRD13B;CRYBA1;TMIGD1;SSH2;DHRS13;FAM222B;OMG;BLMH	EFCAB5	3b
133		rs55866125	17:28312993:C:T	lead	17	28312993	17:28256807:C:G	0.815062	EFCAB5;CRYBA1;BLMH;ANKRD13B;RAB11FIP4;MIR3184;SSH2;TAOK1;NF1;MIR4523;TMIGD1;SLC6A4;PIPOX;MYO18A;SPAG5-AS1;CPD;SUZ12P1;PHF12;NSRP1;NOS2;EVI2A;KSR1;SLC46A1	EFCAB5	4
133		rs55866125	17:28312993:C:T	lead	17	28312993	17:28257660:A:G	0.920352	EFCAB5;CRYBA1;BLMH;ANKRD13B;RAB11FIP4;MIR3184;SSH2;TAOK1;NF1;MIR4523;TMIGD1;SLC6A4;PIPOX;MYO18A;SPAG5-AS1;CPD;SUZ12P1;PHF12;NSRP1;NOS2;EVI2A;KSR1;SLC46A1	EFCAB5	4
133		rs55866125	17:28312993:C:T	lead	17	28312993	17:28255827:D:I	0.802455	EFCAB5;CRYBA1;BLMH;ANKRD13B;RAB11FIP4;MIR3184;SSH2;TAOK1;NF1;MIR4523;TMIGD1;SLC6A4;PIPOX;MYO18A;SPAG5-AS1;CPD;SUZ12P1;PHF12;NSRP1;NOS2;EVI2A;KSR1;SLC46A1	EFCAB5	5
133		rs55866125	17:28312993:C:T	lead	17	28312993	17:28263067:C:G	0.949153	EFCAB5;CRYBA1;BLMH;ANKRD13B;RAB11FIP4;MIR3184;SSH2;TAOK1;NF1;MIR4523;TMIGD1;SLC6A4;PIPOX;MYO18A;SPAG5-AS1;CPD;SUZ12P1;PHF12;NSRP1;NOS2;EVI2A;KSR1;SLC46A1	EFCAB5	5
133		rs55866125	17:28312993:C:T	lead	17	28312993	17:28270350:C:T	0.952883	EFCAB5;CRYBA1;BLMH;ANKRD13B;RAB11FIP4;MIR3184;SSH2;TAOK1;NF1;MIR4523;TMIGD1;SLC6A4;PIPOX;MYO18A;SPAG5-AS1;CPD;SUZ12P1;PHF12;NSRP1;NOS2;EVI2A;KSR1;SLC46A1	EFCAB5	5
133		rs55866125	17:28312993:C:T	lead	17	28312993	17:28271207:C:T	0.953625	EFCAB5;CRYBA1;BLMH;ANKRD13B;RAB11FIP4;MIR3184;SSH2;TAOK1;NF1;MIR4523;TMIGD1;SLC6A4;PIPOX;MYO18A;SPAG5-AS1;CPD;SUZ12P1;PHF12;NSRP1;NOS2;EVI2A;KSR1;SLC46A1	EFCAB5	5
133		rs55866125	17:28312993:C:T	lead	17	28312993	17:28281437:A:G	0.966589	EFCAB5;EVI2A;CRYBA1;CPD;SPAG5-AS1;RAB11FIP4;SEZ6;ANKRD13B;SSH2;SLC6A4;NF1;GOSR1;TMIGD1;PROCA1;KSR1;TEFM;LRRC37B;TMEM98	EFCAB5	5
133		rs55866125	17:28312993:C:T	lead	17	28312993	17:28289818:C:T	0.968866	EFCAB5;EVI2A;CRYBA1;CPD;SPAG5-AS1;RAB11FIP4;SEZ6;ANKRD13B;SSH2;SLC6A4;NF1;GOSR1;TMIGD1;PROCA1;KSR1;TEFM;LRRC37B;TMEM98	EFCAB5	5
133		rs55866125	17:28312993:C:T	lead	17	28312993	17:28312993:C:T	1	EFCAB5;EVI2A;CRYBA1;CPD;SPAG5-AS1;RAB11FIP4;SEZ6;ANKRD13B;SSH2;SLC6A4;NF1;GOSR1;TMIGD1;PROCA1;KSR1;TEFM;LRRC37B;TMEM98	EFCAB5	5
133		rs55866125	17:28312993:C:T	lead	17	28312993	17:28378276:C:T	0.955122	EFCAB5;GOSR1;RAB11FIP4;SPACA3;SLC6A4;ANKRD13B;CRYBA1;TMIGD1;SSH2;DHRS13;FAM222B;OMG;BLMH	EFCAB5	5
133		rs55866125	17:28312993:C:T	lead	17	28312993	17:28406018:C:T	0.939798	BLMH;SLC6A4;EFCAB5;TMIGD1;CPD;MYO18A;CRYBA1;GOSR1;NF1;ANKRD13B	EFCAB5	5
133		rs55866125	17:28312993:C:T	lead	17	28312993	17:28408070:C:T	0.937444	BLMH;SLC6A4;EFCAB5;TMIGD1;CPD;MYO18A;CRYBA1;GOSR1;NF1;ANKRD13B	EFCAB5	5
133		rs55866125	17:28312993:C:T	lead	17	28312993	17:28408217:C:T	0.937492	BLMH;SLC6A4;EFCAB5;TMIGD1;CPD;MYO18A;CRYBA1;GOSR1;NF1;ANKRD13B	EFCAB5	5
133		rs55866125	17:28312993:C:T	lead	17	28312993	17:28410124:C:T	0.95631	BLMH;SLC6A4;EFCAB5;TMIGD1;CPD;MYO18A;CRYBA1;GOSR1;NF1;ANKRD13B	EFCAB5	5
135	CSHL1	rs2006122	17:61987405:A:T	lead	17	61987405	17:61993137:A:G	0.9398	TEX2	TEX2	1d
135		rs2006122	17:61987405:A:T	lead	17	61987405	17:61993701:C:T	0.938687	TEX2	TEX2	4
135		rs2006122	17:61987405:A:T	lead	17	61987405	17:61966764:C:G	0.828957	TEX2	TEX2	5
135		rs2006122	17:61987405:A:T	lead	17	61987405	17:61966765:C:T	0.828957	TEX2	TEX2	5
135		rs2006122	17:61987405:A:T	lead	17	61987405	17:61979993:A:C	0.852303	TEX2	TEX2	5
135		rs2006122	17:61987405:A:T	lead	17	61987405	17:61987405:A:T	1	TEX2	TEX2	5
136	PRKCA	rs9909004	17:64306133:C:T	lead	17	64306133	17:64321567:C:T	0.807481	BPTF;MIR3064;CACNG5;MIR4524A;AXIN2;ABCA8;NOL11;CEP95;MIR4315-1	BPTF	3a
136		rs9909004	17:64306133:C:T	lead	17	64306133	17:64307014:A:G	0.99685	CEP95;GNA13;FAM20A;AMZ2P1;TEX2;CACNG5;CACNG4;BPTF;ARSG;ABCA5;TANC2	BPTF	4
136		rs9909004	17:64306133:C:T	lead	17	64306133	17:64301842:A:G	0.882926	CEP95;GNA13;FAM20A;AMZ2P1;TEX2;CACNG5;CACNG4;BPTF;ARSG;ABCA5;TANC2	BPTF	5
136		rs9909004	17:64306133:C:T	lead	17	64306133	17:64302652:A:G	0.883759	CEP95;GNA13;FAM20A;AMZ2P1;TEX2;CACNG5;CACNG4;BPTF;ARSG;ABCA5;TANC2	BPTF	5
136		rs9909004	17:64306133:C:T	lead	17	64306133	17:64303793:C:T	0.99685	CEP95;GNA13;FAM20A;AMZ2P1;TEX2;CACNG5;CACNG4;BPTF;ARSG;ABCA5;TANC2	BPTF	5
136		rs9909004	17:64306133:C:T	lead	17	64306133	17:64306133:C:T	1	CEP95;GNA13;FAM20A;AMZ2P1;TEX2;CACNG5;CACNG4;BPTF;ARSG;ABCA5;TANC2	BPTF	5
136		rs9909004	17:64306133:C:T	lead	17	64306133	17:64307611:A:C	0.901498	CEP95;GNA13;FAM20A;AMZ2P1;TEX2;CACNG5;CACNG4;BPTF;ARSG;ABCA5;TANC2	BPTF	5
136		rs9909004	17:64306133:C:T	lead	17	64306133	17:64307982:C:T	0.856508	CEP95;GNA13;FAM20A;AMZ2P1;TEX2;CACNG5;CACNG4;BPTF;ARSG;ABCA5;TANC2	BPTF	5
136		rs9909004	17:64306133:C:T	lead	17	64306133	17:64308473:C:T	0.854453	CEP95;GNA13;FAM20A;AMZ2P1;TEX2;CACNG5;CACNG4;BPTF;ARSG;ABCA5;TANC2	BPTF	5
136		rs9909004	17:64306133:C:T	lead	17	64306133	17:64311249:C:T	0.84783	CEP95;GNA13;FAM20A;AMZ2P1;TEX2;CACNG5;CACNG4;BPTF;ARSG;ABCA5;TANC2	BPTF	5
136		rs9909004	17:64306133:C:T	lead	17	64306133	17:64315569:C:T	0.807582	CEP95;GNA13;FAM20A;AMZ2P1;TEX2;CACNG5;CACNG4;BPTF;ARSG;ABCA5;TANC2	BPTF	5
136		rs9909004	17:64306133:C:T	lead	17	64306133	17:64318357:C:G	0.807481	CEP95;GNA13;FAM20A;AMZ2P1;TEX2;CACNG5;CACNG4;BPTF;ARSG;ABCA5;TANC2	BPTF	5
137*	CASKIN2	rs7501873	17:73505172:A:G	lead	17	73505172	17:73505172:A:G	1	MIR3678;KCTD2;TNRC6C;ST6GALNAC2	MIR3678	4
137		rs7501873	17:73505172:A:G	lead	17	73505172	17:73504911:C:T	1	MIR3678;KCTD2;TNRC6C;ST6GALNAC2	MIR3678	4
137		rs7501873	17:73505172:A:G	lead	17	73505172	17:73509280:D:I	1	MIR3678;KCTD2;TNRC6C;ST6GALNAC2	MIR3678	4
137		rs7501873	17:73505172:A:G	lead	17	73505172	17:73502118:A:G	0.988166	MIR3678;KCTD2;TNRC6C;ST6GALNAC2	MIR3678	5
137		rs7501873	17:73505172:A:G	lead	17	73505172	17:73505411:A:T	1	MIR3678;KCTD2;TNRC6C;ST6GALNAC2	MIR3678	5
137		rs7501873	17:73505172:A:G	lead	17	73505172	17:73506608:D:I	1	MIR3678;KCTD2;TNRC6C;ST6GALNAC2	MIR3678	5
137		rs7501873	17:73505172:A:G	lead	17	73505172	17:73508787:A:G	1	MIR3678;KCTD2;TNRC6C;ST6GALNAC2	MIR3678	5
137		rs7501873	17:73505172:A:G	lead	17	73505172	17:73510012:A:T	0.98819	MIR3678;KCTD2;TNRC6C;ST6GALNAC2	MIR3678	5
138	AC100791.2	rs745570	17:77781725:A:G	lead	17	77781725	17:77781725:A:G	1	TBC1D16;CYTH1;RNF213;C1QTNF1-AS1;ENGASE;MGAT5B;SLC38A10	TBC1D16	2b
138		rs745570	17:77781725:A:G	lead	17	77781725	17:77781387:C:T	0.995344	TBC1D16;CYTH1;RNF213;C1QTNF1-AS1;ENGASE;MGAT5B;SLC38A10	TBC1D16	4
138		rs745570	17:77781725:A:G	lead	17	77781725	17:77790135:C:T	0.869462	TBC1D16;CYTH1;RNF213;C1QTNF1-AS1;ENGASE;MGAT5B;SLC38A10	TBC1D16	4
138		rs745570	17:77781725:A:G	lead	17	77781725	17:77768654:A:C	0.92351	TBC1D16;CYTH1;RNF213;C1QTNF1-AS1;ENGASE;MGAT5B;SLC38A10	TBC1D16	5
139	CDH2	rs11083300	18:26339589:C:G	lead	18	26339589	18:26315899:A:G	0.941356	CDH2;MIR302F	CDH2	2b
139		rs11083300	18:26339589:C:G	lead	18	26339589	18:26379150:A:G	0.860016	DSG3;CDH2;AQP4;CHST9;DSG1;DSC2;DSG2-AS1;MIR302F;KCTD1;B4GALT6;DSG2;SS18;TAF4B	CDH2	3a
139		rs11083300	18:26339589:C:G	lead	18	26339589	18:26451082:C:G	0.809907	DSC2;DSG1	CDH2	3a
139		rs11083300	18:26339589:C:G	lead	18	26339589	18:26315799:C:G	0.846751	CDH2;MIR302F	CDH2	4
139		rs11083300	18:26339589:C:G	lead	18	26339589	18:26379240:A:G	0.868756	DSG3;CDH2;AQP4;CHST9;DSG1;DSC2;DSG2-AS1;MIR302F;KCTD1;B4GALT6;DSG2;SS18;TAF4B	CDH2	4
139		rs11083300	18:26339589:C:G	lead	18	26339589	18:26404772:C:T	0.84849	KCTD1;CDH2;SLC25A52;MIR302F	CDH2	4
139		rs11083300	18:26339589:C:G	lead	18	26339589	18:26437593:C:T	0.846092	KCTD1;CDH2;SLC25A52;MIR302F	CDH2	4
139		rs11083300	18:26339589:C:G	lead	18	26339589	18:26264343:A:G	0.820095	MIR302F;CDH2;DSC3;AQP4;KCTD1;DSG2	CDH2	5
139		rs11083300	18:26339589:C:G	lead	18	26339589	18:26264421:C:G	0.821463	MIR302F;CDH2;DSC3;AQP4;KCTD1;DSG2	CDH2	5
139		rs11083300	18:26339589:C:G	lead	18	26339589	18:26264471:A:G	0.820779	MIR302F;CDH2;DSC3;AQP4;KCTD1;DSG2	CDH2	5
139		rs11083300	18:26339589:C:G	lead	18	26339589	18:26266935:C:G	0.837707	MIR302F;CDH2;DSC3;AQP4;KCTD1;DSG2	CDH2	5
139		rs11083300	18:26339589:C:G	lead	18	26339589	18:26267775:D:I	0.839826	MIR302F;CDH2;DSC3;AQP4;KCTD1;DSG2	CDH2	5
139		rs11083300	18:26339589:C:G	lead	18	26339589	18:26270166:A:G	0.838319	MIR302F;CDH2;DSC3;AQP4;KCTD1;DSG2	CDH2	5
139		rs11083300	18:26339589:C:G	lead	18	26339589	18:26284332:C:G	0.833067	CDH2;MIR302F	CDH2	5
139		rs11083300	18:26339589:C:G	lead	18	26339589	18:26294805:A:T	0.844214	CDH2;MIR302F	CDH2	5
139		rs11083300	18:26339589:C:G	lead	18	26339589	18:26314436:C:T	0.942077	CDH2;MIR302F	CDH2	5
139		rs11083300	18:26339589:C:G	lead	18	26339589	18:26322005:G:T	0.922234	PCAT18;DSG2;KCTD1;MIR302F;DSC3	CDH2	5
139		rs11083300	18:26339589:C:G	lead	18	26339589	18:26375403:A:G	0.85879	DSG3;CDH2;AQP4;CHST9;DSG1;DSC2;DSG2-AS1;MIR302F;KCTD1;B4GALT6;DSG2;SS18;TAF4B	CDH2	5
139		rs11083300	18:26339589:C:G	lead	18	26339589	18:26389201:G:T	0.868154	DSG3;CDH2;AQP4;CHST9;DSG1;DSC2;DSG2-AS1;MIR302F;KCTD1;B4GALT6;DSG2;SS18;TAF4B	CDH2	5
139		rs11083300	18:26339589:C:G	lead	18	26339589	18:26404958:A:G	0.867411	KCTD1;CDH2;SLC25A52;MIR302F	CDH2	5
139		rs11083300	18:26339589:C:G	lead	18	26339589	18:26411727:A:G	0.85766	KCTD1;CDH2;SLC25A52;MIR302F	CDH2	5
139		rs11083300	18:26339589:C:G	lead	18	26339589	18:26415610:C:T	0.85766	KCTD1;CDH2;SLC25A52;MIR302F	CDH2	5
139		rs11083300	18:26339589:C:G	lead	18	26339589	18:26434227:A:G	0.846108	KCTD1;CDH2;SLC25A52;MIR302F	CDH2	5
140	GAREM	rs982521	18:30029141:C:T	lead	18	30029141	18:30019340:C:T	0.808238	ZNF24;DSG2-AS1;ASXL3;MEP1B;MAPRE2;NOL4	ZNF24	3a
140		rs982521	18:30029141:C:T	lead	18	30029141	18:30026924:A:G	0.822687	ZNF24;DSG2-AS1;ASXL3;MEP1B;MAPRE2;NOL4	ZNF24	3a
140		rs982521	18:30029141:C:T	lead	18	30029141	18:30030339:C:T	0.974775	ZNF24;DSG2-AS1;ASXL3;MEP1B;MAPRE2;NOL4	ZNF24	3a
140		rs982521	18:30029141:C:T	lead	18	30029141	18:30007510:A:G	0.873325	ZNF24;DSG2-AS1;ASXL3;MEP1B;MAPRE2;NOL4	ZNF24	5
140		rs982521	18:30029141:C:T	lead	18	30029141	18:30007743:C:T	0.873325	ZNF24;DSG2-AS1;ASXL3;MEP1B;MAPRE2;NOL4	ZNF24	5
140		rs982521	18:30029141:C:T	lead	18	30029141	18:30009759:A:G	0.873325	ZNF24;DSG2-AS1;ASXL3;MEP1B;MAPRE2;NOL4	ZNF24	5
140		rs982521	18:30029141:C:T	lead	18	30029141	18:30017332:C:T	0.874969	ZNF24;DSG2-AS1;ASXL3;MEP1B;MAPRE2;NOL4	ZNF24	5
140		rs982521	18:30029141:C:T	lead	18	30029141	18:30020635:A:G	0.807924	ZNF24;DSG2-AS1;ASXL3;MEP1B;MAPRE2;NOL4	ZNF24	5
140		rs982521	18:30029141:C:T	lead	18	30029141	18:30029141:C:T	1	ZNF24;DSG2-AS1;ASXL3;MEP1B;MAPRE2;NOL4	ZNF24	5
140		rs982521	18:30029141:C:T	lead	18	30029141	18:30030605:C:T	0.973936	ZNF24;DSG2-AS1;ASXL3;MEP1B;MAPRE2;NOL4	ZNF24	5
141	DTNA	rs1786595	18:32399259:C:T	lead	18	32399259	18:32400516:G:T	0.988878	DTNA;MAPRE2;GAREM1;C18orf21;NOL4;ZSCAN30;RPRD1A;ZNF24;ASXL3;ZNF397	DTNA	1d
141		rs1786595	18:32399259:C:T	lead	18	32399259	18:32407987:A:G	0.844378	DTNA;MAPRE2;GAREM1;C18orf21;NOL4;ZSCAN30;RPRD1A;ZNF24;ASXL3;ZNF397	DTNA	1f
141		rs1786595	18:32399259:C:T	lead	18	32399259	18:32408202:C:G	0.893385	DTNA;MAPRE2;GAREM1;C18orf21;NOL4;ZSCAN30;RPRD1A;ZNF24;ASXL3;ZNF397	DTNA	1f
141		rs1786595	18:32399259:C:T	lead	18	32399259	18:32421639:A:G	0.851194	DTNA;MAPRE2;GAREM1;C18orf21;NOL4;ZSCAN30;RPRD1A;ZNF24;ASXL3;ZNF397	DTNA	1f
141		rs1786595	18:32399259:C:T	lead	18	32399259	18:32422326:C:T	0.850154	DTNA;MAPRE2;GAREM1;C18orf21;NOL4;ZSCAN30;RPRD1A;ZNF24;ASXL3;ZNF397	DTNA	1f
141		rs1786595	18:32399259:C:T	lead	18	32399259	18:32428928:A:G	0.856408	DTNA;MAPRE2;GAREM1;C18orf21;NOL4;ZSCAN30;RPRD1A;ZNF24;ASXL3;ZNF397	DTNA	1f
141		rs1786595	18:32399259:C:T	lead	18	32399259	18:32414905:A:G	0.811769	DTNA;MAPRE2;GAREM1;C18orf21;NOL4;ZSCAN30;RPRD1A;ZNF24;ASXL3;ZNF397	DTNA	5
141		rs1786595	18:32399259:C:T	lead	18	32399259	18:32424519:D:I	0.839049	DTNA;MAPRE2;GAREM1;C18orf21;NOL4;ZSCAN30;RPRD1A;ZNF24;ASXL3;ZNF397	DTNA	5
144	ZNF358	rs113394178	19:7581244:A:C	lead	19	7581244	19:7581244:A:C	1	CLEC4GP1;ZNF266;ADGRE4P;MIR1181	CLEC4GP1	4
145	TMEM59L	rs111551996	19:18733355:G:T	lead	19	18733355	19:18733355:G:T	1	HOMER3	HOMER3	5
146	RNF24 - SMOX	rs16989138	20:4031653:A:G	lead	20	4031653	20:4031439:G:T	0.853196	UBOX5-AS1;PCNA-AS1;UBOX5;LINC00658	UBOX5-AS1	4
146		rs16989138	20:4031653:A:G	lead	20	4031653	20:4031653:A:G	1	UBOX5-AS1;PCNA-AS1;UBOX5;LINC00658	UBOX5-AS1	5
147	KIAA1755	rs6023939	20:36832526:A:C	lead	20	36832526	20:36842836:C:T	0.857149	RPRD1B;LINC00489;CTNNBL1;GHRH;TGM2;MANBAL;LOC100287792;VSTM2L;KIAA1755;MROH8;DLGAP4	RPRD1B	3a
147		rs6023939	20:36832526:A:C	lead	20	36832526	20:36832526:A:C	1	RPRD1B;CTNNBL1;LINC00489;MANBAL;LOC100287792;MROH8;GHRH;KIAA1755;RBM12;UQCC1;ROMO1;RBL1;TGM2;BLCAP;PHF20	RPRD1B	5
147		rs6023939	20:36832526:A:C	lead	20	36832526	20:36833268:A:T	0.998359	RPRD1B;CTNNBL1;LINC00489;MANBAL;LOC100287792;MROH8;GHRH;KIAA1755;RBM12;UQCC1;ROMO1;RBL1;TGM2;BLCAP;PHF20	RPRD1B	5
148	DERL3	rs2070464	22:24183875:A:G	lead	22	24183875	22:24183875:A:G	1	BCR;LRP5L;CABIN1;SEZ6L	BCR	5
148		rs2070464	22:24183875:A:G	lead	22	24183875	22:24187115:A:G	0.832401	BCR;LRP5L;CABIN1;SEZ6L	BCR	5
148		rs2070464	22:24183875:A:G	lead	22	24183875	22:24187123:A:G	0.832401	BCR;LRP5L;CABIN1;SEZ6L	BCR	5
149	PHF5A	rs9607805	22:41854446:C:T	lead	22	41854446	22:41913477:C:T	0.821918	TOB2;GTPBP1;DNAJB7;TNRC6B;DDX17;MCHR1;RPS19BP1;PNPLA5;MIR4766;XRCC6;CACNA1I;ZC3H7B;L3MBTL2;LOC100130899;POLDIP3;MKL1	TOB2	2b
149		rs9607805	22:41854446:C:T	lead	22	41854446	22:41925535:C:T	0.821356	XRCC6;TOB2;MIR4766;NPTXR;CACNA1I;DMC1;DNAJB7;CBY1;RPS19BP1;ADSL;MCAT	TOB2	3a
149		rs9607805	22:41854446:C:T	lead	22	41854446	22:41830212:A:G	0.84734	TOB2;DDX17;RBX1;MGAT3	TOB2	5
149		rs9607805	22:41854446:C:T	lead	22	41854446	22:41854446:C:T	1	POLR3H;DNAJB7;ARFGAP3;XRCC6;MGAT3;MKL1;MCHR1;TNRC6B;ADSL;TEF;PDGFB;SNORD43;GTPBP1;TAB1;RBX1;L3MBTL2;TTLL1;ZC3H7B	TOB2	5
(b) previously reported loci
1	SKI	rs2503715	1:2144107:A:G	lead	1	2144107	1:2144107:A:G	1	MORN1	MORN1	4
2	MACF1	rs57214150	1:39654372:C:G	lead	1	39654372	1:39703847:A:G	0.846574	MACF1;PABPC4;INPP5B;SNIP1;CAP1;RIMS3	MACF1	1f
2		rs57214150	1:39654372:C:G	lead	1	39654372	1:39578986:A:G	0.878945	MACF1;KIAA0754;EPHA10;PABPC4;PPIEL;MTF1;RLF;RIMS3;CAP1;HPCAL4;MRPS15;POU3F1;RRAGC	MACF1	2b
2		rs57214150	1:39654372:C:G	lead	1	39654372	1:39679402:C:T	0.990897	MACF1;PPIEL;INPP5B;GNL2;THRAP3;OSCP1;C1orf109;SNIP1;EPHA10;NFYC;PABPC4	MACF1	2b
2		rs57214150	1:39654372:C:G	lead	1	39654372	1:39728647:C:G	0.890604	MACF1;KIAA0754;PABPC4;PPIEL;SLFNL1-AS1;AKIRIN1;RLF;NDUFS5;POU3F1;GNL2;RRAGC;MIR5581;STK40;PPT1;SNIP1;TRIT1;SF3A3;CTPS1;PPIE;NT5C1A;INPP5B	MACF1	2b
2		rs57214150	1:39654372:C:G	lead	1	39654372	1:39748662:A:G	0.987257	MACF1;KIAA0754;PABPC4;PPIEL;SLFNL1-AS1;AKIRIN1;RLF;NDUFS5;POU3F1;GNL2;RRAGC;MIR5581;STK40;PPT1;SNIP1;TRIT1;SF3A3;CTPS1;PPIE;NT5C1A;INPP5B	MACF1	2b
2		rs57214150	1:39654372:C:G	lead	1	39654372	1:39874539:G:T	0.949023	MACF1;GNL2;NDUFS5	MACF1	2b
2		rs57214150	1:39654372:C:G	lead	1	39654372	1:39578352:D:I	0.874078	MACF1;KIAA0754;EPHA10;PABPC4;PPIEL;MTF1;RLF;RIMS3;CAP1;HPCAL4;MRPS15;POU3F1;RRAGC	MACF1	2c
2		rs57214150	1:39654372:C:G	lead	1	39654372	1:39571992:G:T	0.866165	MACF1;KIAA0754;EPHA10;PABPC4;PPIEL;MTF1;RLF;RIMS3;CAP1;HPCAL4;MRPS15;POU3F1;RRAGC	MACF1	3a
2		rs57214150	1:39654372:C:G	lead	1	39654372	1:39716844:D:I	0.979957	MACF1;PABPC4;INPP5B;SNIP1;CAP1;RIMS3	MACF1	3a
2		rs57214150	1:39654372:C:G	lead	1	39654372	1:39820310:C:T	0.914179	MACF1;KIAA0754;PABPC4;RRAGC;POU3F1;AKIRIN1;PPIEL;C1orf109;RLF;NDUFS5;GNL2;RHBDL2;HEYL;NFYC;PPIE;SNIP1;PPT1	MACF1	3a
2		rs57214150	1:39654372:C:G	lead	1	39654372	1:39868621:D:I	0.949023	MACF1;GNL2;NDUFS5	MACF1	3a
2		rs57214150	1:39654372:C:G	lead	1	39654372	1:39616690:C:G	0.951512	MACF1;PABPC4;PPIEL;KIAA0754;POU3F1;AKIRIN1;TRAPPC3;RRAGC;HEYL;RLF;MFSD2A;GNL2	MACF1	4
2		rs57214150	1:39654372:C:G	lead	1	39654372	1:39649198:A:T	0.990897	MACF1;PPIEL;INPP5B;GNL2;THRAP3;OSCP1;C1orf109;SNIP1;EPHA10;NFYC;PABPC4	MACF1	4
2		rs57214150	1:39654372:C:G	lead	1	39654372	1:39662508:A:G	0.990873	MACF1;PPIEL;INPP5B;GNL2;THRAP3;OSCP1;C1orf109;SNIP1;EPHA10;NFYC;PABPC4	MACF1	4
2		rs57214150	1:39654372:C:G	lead	1	39654372	1:39662618:A:G	0.989062	MACF1;PPIEL;INPP5B;GNL2;THRAP3;OSCP1;C1orf109;SNIP1;EPHA10;NFYC;PABPC4	MACF1	4
2		rs57214150	1:39654372:C:G	lead	1	39654372	1:39683298:C:T	0.989062	MACF1;PABPC4;INPP5B;SNIP1;CAP1;RIMS3	MACF1	4
2		rs57214150	1:39654372:C:G	lead	1	39654372	1:39748271:A:G	0.983663	MACF1;KIAA0754;PABPC4;PPIEL;SLFNL1-AS1;AKIRIN1;RLF;NDUFS5;POU3F1;GNL2;RRAGC;MIR5581;STK40;PPT1;SNIP1;TRIT1;SF3A3;CTPS1;PPIE;NT5C1A;INPP5B	MACF1	4
2		rs57214150	1:39654372:C:G	lead	1	39654372	1:39837102:C:T	0.954437	MACF1;KIAA0754;PABPC4;RRAGC;POU3F1;AKIRIN1;PPIEL;C1orf109;RLF;NDUFS5;GNL2;RHBDL2;HEYL;NFYC;PPIE;SNIP1;PPT1	MACF1	4
2		rs57214150	1:39654372:C:G	lead	1	39654372	1:39857192:A:G	0.949031	MACF1;GNL2;NDUFS5	MACF1	4
2		rs57214150	1:39654372:C:G	lead	1	39654372	1:39870793:C:T	0.949023	MACF1;GNL2;NDUFS5	MACF1	4
2		rs57214150	1:39654372:C:G	lead	1	39654372	1:39576621:G:T	0.88249	MACF1;KIAA0754;EPHA10;PABPC4;PPIEL;MTF1;RLF;RIMS3;CAP1;HPCAL4;MRPS15;POU3F1;RRAGC	MACF1	5
2		rs57214150	1:39654372:C:G	lead	1	39654372	1:39578532:A:G	0.875696	MACF1;KIAA0754;EPHA10;PABPC4;PPIEL;MTF1;RLF;RIMS3;CAP1;HPCAL4;MRPS15;POU3F1;RRAGC	MACF1	5
2		rs57214150	1:39654372:C:G	lead	1	39654372	1:39590409:G:T	0.949588	MACF1;KIAA0754;EPHA10;PABPC4;PPIEL;MTF1;RLF;RIMS3;CAP1;HPCAL4;MRPS15;POU3F1;RRAGC	MACF1	5
2		rs57214150	1:39654372:C:G	lead	1	39654372	1:39609298:A:T	0.831782	MACF1;PABPC4;PPIEL;KIAA0754;POU3F1;AKIRIN1;TRAPPC3;RRAGC;HEYL;RLF;MFSD2A;GNL2	MACF1	5
2		rs57214150	1:39654372:C:G	lead	1	39654372	1:39618556:A:G	0.979957	MACF1;PABPC4;PPIEL;KIAA0754;POU3F1;AKIRIN1;TRAPPC3;RRAGC;HEYL;RLF;MFSD2A;GNL2	MACF1	5
2		rs57214150	1:39654372:C:G	lead	1	39654372	1:39639653:C:T	0.990873	MACF1;PABPC4;PPIEL;KIAA0754;POU3F1;AKIRIN1;TRAPPC3;RRAGC;HEYL;RLF;MFSD2A;GNL2	MACF1	5
2		rs57214150	1:39654372:C:G	lead	1	39654372	1:39639744:A:C	0.990873	MACF1;PABPC4;PPIEL;KIAA0754;POU3F1;AKIRIN1;TRAPPC3;RRAGC;HEYL;RLF;MFSD2A;GNL2	MACF1	5
2		rs57214150	1:39654372:C:G	lead	1	39654372	1:39643382:A:G	0.990873	MACF1;PPIEL;INPP5B;GNL2;THRAP3;OSCP1;C1orf109;SNIP1;EPHA10;NFYC;PABPC4	MACF1	5
2		rs57214150	1:39654372:C:G	lead	1	39654372	1:39711930:C:T	0.989062	MACF1;PABPC4;INPP5B;SNIP1;CAP1;RIMS3	MACF1	5
2		rs57214150	1:39654372:C:G	lead	1	39654372	1:39719519:C:T	0.846574	MACF1;PABPC4;INPP5B;SNIP1;CAP1;RIMS3	MACF1	5
2		rs57214150	1:39654372:C:G	lead	1	39654372	1:39722214:A:G	0.981923	MACF1;KIAA0754;PABPC4;PPIEL;SLFNL1-AS1;AKIRIN1;RLF;NDUFS5;POU3F1;GNL2;RRAGC;MIR5581;STK40;PPT1;SNIP1;TRIT1;SF3A3;CTPS1;PPIE;NT5C1A;INPP5B	MACF1	5
2		rs57214150	1:39654372:C:G	lead	1	39654372	1:39736334:C:G	0.981873	MACF1;KIAA0754;PABPC4;PPIEL;SLFNL1-AS1;AKIRIN1;RLF;NDUFS5;POU3F1;GNL2;RRAGC;MIR5581;STK40;PPT1;SNIP1;TRIT1;SF3A3;CTPS1;PPIE;NT5C1A;INPP5B	MACF1	5
2		rs57214150	1:39654372:C:G	lead	1	39654372	1:39770949:D:I	0.979957	MACF1;PPIEL;RRAGC;KIAA0754;POU3F1;MTF1;INPP5B;NT5C1A;GNL2;SMAP2	MACF1	5
2		rs57214150	1:39654372:C:G	lead	1	39654372	1:39801815:A:C	0.956297	MACF1;KIAA0754;PABPC4;RRAGC;POU3F1;AKIRIN1;PPIEL;C1orf109;RLF;NDUFS5;GNL2;RHBDL2;HEYL;NFYC;PPIE;SNIP1;PPT1	MACF1	5
2		rs57214150	1:39654372:C:G	lead	1	39654372	1:39815344:A:G	0.95625	MACF1;KIAA0754;PABPC4;RRAGC;POU3F1;AKIRIN1;PPIEL;C1orf109;RLF;NDUFS5;GNL2;RHBDL2;HEYL;NFYC;PPIE;SNIP1;PPT1	MACF1	5
2		rs57214150	1:39654372:C:G	lead	1	39654372	1:39819503:A:G	0.949031	MACF1;KIAA0754;PABPC4;RRAGC;POU3F1;AKIRIN1;PPIEL;C1orf109;RLF;NDUFS5;GNL2;RHBDL2;HEYL;NFYC;PPIE;SNIP1;PPT1	MACF1	5
2		rs57214150	1:39654372:C:G	lead	1	39654372	1:39833535:A:G	0.956244	MACF1;KIAA0754;PABPC4;RRAGC;POU3F1;AKIRIN1;PPIEL;C1orf109;RLF;NDUFS5;GNL2;RHBDL2;HEYL;NFYC;PPIE;SNIP1;PPT1	MACF1	5
2		rs57214150	1:39654372:C:G	lead	1	39654372	1:39867055:C:T	0.949023	MACF1;GNL2;NDUFS5	MACF1	5
2		rs57214150	1:39654372:C:G	lead	1	39654372	1:39880319:G:T	0.952634	MACF1;PPIEL;KIAA0754;AKIRIN1;RRAGC;POU3F1;GNL2;MTF1;INPP5B;OSCP1;RIMKLA;NDUFS5;EPHA10	MACF1	5
2		rs57214150	1:39654372:C:G	lead	1	39654372	1:39881468:A:T	0.949031	MACF1;PPIEL;KIAA0754;AKIRIN1;RRAGC;POU3F1;GNL2;MTF1;INPP5B;OSCP1;RIMKLA;NDUFS5;EPHA10	MACF1	5
2		rs57214150	1:39654372:C:G	lead	1	39654372	1:39883020:D:I	0.949023	MACF1;PPIEL;KIAA0754;AKIRIN1;RRAGC;POU3F1;GNL2;MTF1;INPP5B;OSCP1;RIMKLA;NDUFS5;EPHA10	MACF1	5
2		rs57214150	1:39654372:C:G	lead	1	39654372	1:39885763:A:G	0.952634	MACF1;PPIEL;KIAA0754;AKIRIN1;RRAGC;POU3F1;GNL2;MTF1;INPP5B;OSCP1;RIMKLA;NDUFS5;EPHA10	MACF1	5
2		rs57214150	1:39654372:C:G	lead	1	39654372	1:39922426:A:G	0.869098	MACF1;AKIRIN1;EPHA10;MTF1	MACF1	5
2		rs57214150	1:39654372:C:G	lead	1	39654372	1:39923732:C:T	0.874496	MACF1;AKIRIN1;EPHA10;MTF1	MACF1	5
2		rs57214150	1:39654372:C:G	lead	1	39654372	1:39936799:D:I	0.871029	MACF1;AKIRIN1;EPHA10;MTF1	MACF1	5
2		rs57214150	1:39654372:C:G	lead	1	39654372	1:39940499:C:T	0.869298	MACF1;AKIRIN1;EPHA10;MTF1	MACF1	5
3	EPS15	rs72690486	1:51220017:G:T	lead	1	51220017	1:51436946:A:G	0.966276	ZCCHC11;OSBPL9;MIR761;TXNDC12;FAF1;SHISAL2A;C1orf185;SCP2	ZCCHC11	2b
3		rs72690486	1:51220017:G:T	lead	1	51220017	1:51440463:A:G	0.966276	FAF1;TRABD2B;SCP2	ZCCHC11	3a
3		rs72690486	1:51220017:G:T	lead	1	51220017	1:50892870:A:G	0.860678	BEND5;AGBL4;OSBPL9	ZCCHC11	4
3		rs72690486	1:51220017:G:T	lead	1	51220017	1:51485823:C:T	0.966276	FAF1	ZCCHC11	4
3		rs72690486	1:51220017:G:T	lead	1	51220017	1:51528881:C:G	0.931443	C1orf185;FAF1;GLIS1;DMRTA2;OSBPL9	ZCCHC11	4
3		rs72690486	1:51220017:G:T	lead	1	51220017	1:50916964:G:T	0.934777	BEND5;AGBL4;OSBPL9	ZCCHC11	5
3		rs72690486	1:51220017:G:T	lead	1	51220017	1:50991452:C:T	0.860678	SKINT1L;NRDC	ZCCHC11	5
3		rs72690486	1:51220017:G:T	lead	1	51220017	1:51346055:C:T	0.934728	FAF1;TXNDC12;TRABD2B;OSBPL9;NRDC;CPT2	ZCCHC11	5
3		rs72690486	1:51220017:G:T	lead	1	51220017	1:51383369:A:G	0.966276	OSBPL9	ZCCHC11	5
3		rs72690486	1:51220017:G:T	lead	1	51220017	1:51439506:A:T	1	ZCCHC11;OSBPL9;MIR761;TXNDC12;FAF1;SHISAL2A;C1orf185;SCP2	ZCCHC11	5
3		rs72690486	1:51220017:G:T	lead	1	51220017	1:51449880:C:T	0.966276	FAF1;TRABD2B;SCP2	ZCCHC11	5
3		rs72690486	1:51220017:G:T	lead	1	51220017	1:51527684:G:T	0.931443	C1orf185;FAF1;GLIS1;DMRTA2;OSBPL9	ZCCHC11	5
5	KCND3	rs776293589	1:112462949:D:I	conditional	1	112462949	-	-	SYCP1;CTTNBP2NL;C1orf162;PIFO	SYCP1	3a
5		rs776293589	1:112462949:D:I	conditional	1	112462949	1:112454822:C:T	0.836896	SYCP1;CTTNBP2NL;C1orf162;PIFO	SYCP1	5
5		rs776293589	1:112462949:D:I	conditional	1	112462949	1:112470474:C:T	0.803254	SYCP1;CTTNBP2NL;C1orf162;PIFO	SYCP1	5
5		rs776293589	1:112462949:D:I	conditional	1	112462949	1:112471029:C:G	0.809364	SYCP1;CTTNBP2NL;C1orf162;PIFO	SYCP1	5
7	OBSCN	rs287606	1:228450868:A:G	lead	1	228450868	1:228463433:C:T	0.906117	OBSCN-AS1;H3F3A	OBSCN-AS1	2b
7		rs287606	1:228450868:A:G	lead	1	228450868	1:228440468:G:T	0.991674	OBSCN-AS1;H3F3A	OBSCN-AS1	3a
7		rs287606	1:228450868:A:G	lead	1	228450868	1:228428805:A:G	0.965039	OBSCN;SDE2;RAB4A	OBSCN-AS1	5
7		rs287606	1:228450868:A:G	lead	1	228450868	1:228429593:A:G	0.968236	OBSCN;SDE2;RAB4A	OBSCN-AS1	5
7		rs287606	1:228450868:A:G	lead	1	228450868	1:228435855:C:T	0.994787	OBSCN;SDE2;RAB4A	OBSCN-AS1	5
7		rs287606	1:228450868:A:G	lead	1	228450868	1:228438045:A:G	0.968236	OBSCN;SDE2;RAB4A	OBSCN-AS1	5
7		rs287606	1:228450868:A:G	lead	1	228450868	1:228452289:A:G	0.989594	OBSCN-AS1;H3F3A	OBSCN-AS1	5
7		rs287606	1:228450868:A:G	lead	1	228450868	1:228452367:C:T	0.990629	OBSCN-AS1;H3F3A	OBSCN-AS1	5
7		rs287606	1:228450868:A:G	lead	1	228450868	1:228454023:G:T	0.99582	OBSCN-AS1;H3F3A	OBSCN-AS1	5
7		rs287606	1:228450868:A:G	lead	1	228450868	1:228454215:C:T	0.991666	OBSCN-AS1;H3F3A	OBSCN-AS1	5
7		rs287606	1:228450868:A:G	lead	1	228450868	1:228454330:A:G	0.996865	OBSCN-AS1;H3F3A	OBSCN-AS1	5
7		rs287606	1:228450868:A:G	lead	1	228450868	1:228454979:A:T	0.990629	OBSCN-AS1;H3F3A	OBSCN-AS1	5
7		rs287606	1:228450868:A:G	lead	1	228450868	1:228456943:C:T	0.977202	OBSCN-AS1;H3F3A	OBSCN-AS1	5
7		rs287606	1:228450868:A:G	lead	1	228450868	1:228460217:C:T	0.960824	OBSCN-AS1;H3F3A	OBSCN-AS1	5
8	ID2	rs6730558	2:8756183:C:T	lead	2	8756183	2:8756183:C:T	1	LOC100506274;LINC00298	LOC100506274	4
8		rs6730558	2:8756183:C:T	lead	2	8756183	2:8743368:C:T	0.817673	LOC100506274;LINC00298	LOC100506274	5
8		rs6730558	2:8756183:C:T	lead	2	8756183	2:8762414:G:T	0.814928	LOC100506274;CMPK2;LINC00298	LOC100506274	5
8		rs80025787	2:8788633:A:G	conditional	2	8788633	2:8785947:C:G	1	LOC100506274;CMPK2;LINC00298	LOC100506274	5
9	SLC8A1	rs17026114	2:40743183:A:G	lead	2	40743183	2:40739349:C:T	0.947255	SLC8A1;SLC8A1-AS1;TMEM178A;COX7A2L;EML4;LOC375196;C2orf91;MTA3;LOC728730;THUMPD2;KCNG3;HAAO;RMDN2	SLC8A1	5
9		rs17026114	2:40743183:A:G	lead	2	40743183	2:40739357:D:I	0.947255	SLC8A1;SLC8A1-AS1;TMEM178A;COX7A2L;EML4;LOC375196;C2orf91;MTA3;LOC728730;THUMPD2;KCNG3;HAAO;RMDN2	SLC8A1	5
9		rs17026114	2:40743183:A:G	lead	2	40743183	2:40739378:G:T	0.947255	SLC8A1;SLC8A1-AS1;TMEM178A;COX7A2L;EML4;LOC375196;C2orf91;MTA3;LOC728730;THUMPD2;KCNG3;HAAO;RMDN2	SLC8A1	5
9		rs17026114	2:40743183:A:G	lead	2	40743183	2:40739772:G:T	0.896709	SLC8A1;SLC8A1-AS1;TMEM178A;COX7A2L;EML4;LOC375196;C2orf91;MTA3;LOC728730;THUMPD2;KCNG3;HAAO;RMDN2	SLC8A1	5
9		rs17026114	2:40743183:A:G	lead	2	40743183	2:40755643:C:T	0.955163	SLC8A1;SLC8A1-AS1;TMEM178A;COX7A2L;EML4;LOC375196;C2orf91;MTA3;LOC728730;THUMPD2;KCNG3;HAAO;RMDN2	SLC8A1	5
9		rs17026114	2:40743183:A:G	lead	2	40743183	2:40760965:C:T	0.806065	SLC8A1;SLC8A1-AS1;CDKL4;CYP1B1;SOS1;MTA3;THUMPD2;OXER1	SLC8A1	5
10	MEIS1	rs3891585	2:66756976:A:G	lead	2	66756976	2:66756270:A:G	0.914403	MEIS1-AS3;C1D;PPP3R1;ETAA1;LINC02245;ACTR2;AFTPH;LINC01829;SPRED2;GKN1;CEP68;VPS54	MEIS1-AS3	4
10		rs3891585	2:66756976:A:G	lead	2	66756976	2:66756413:A:G	0.93308	MEIS1-AS3;C1D;PPP3R1;ETAA1;LINC02245;ACTR2;AFTPH;LINC01829;SPRED2;GKN1;CEP68;VPS54	MEIS1-AS3	4
10		rs3891585	2:66756976:A:G	lead	2	66756976	2:66782467:C:T	0.866532	MEIS1-AS3;C1D;ETAA1;LINC01829;AFTPH;PPP3R1;PROKR1;VPS54;MIR3126;SPRED2;ACTR2;ARHGAP25	MEIS1-AS3	4
10		rs3891585	2:66756976:A:G	lead	2	66756976	2:66752251:A:G	0.93458	MEIS1-AS3;C1D;PPP3R1;ETAA1;LINC02245;ACTR2;AFTPH;LINC01829;SPRED2;GKN1;CEP68;VPS54	MEIS1-AS3	5
10		rs3891585	2:66756976:A:G	lead	2	66756976	2:66760311:A:G	0.911806	MEIS1-AS3;C1D;ETAA1;LINC01829;AFTPH;PPP3R1;PROKR1;VPS54;MIR3126;SPRED2;ACTR2;ARHGAP25	MEIS1-AS3	5
10		rs3891585	2:66756976:A:G	lead	2	66756976	2:66771047:A:G	0.8666	MEIS1-AS3;C1D;ETAA1;LINC01829;AFTPH;PPP3R1;PROKR1;VPS54;MIR3126;SPRED2;ACTR2;ARHGAP25	MEIS1-AS3	5
10		rs3891585	2:66756976:A:G	lead	2	66756976	2:66772962:C:T	0.881705	MEIS1-AS3;C1D;ETAA1;LINC01829;AFTPH;PPP3R1;PROKR1;VPS54;MIR3126;SPRED2;ACTR2;ARHGAP25	MEIS1-AS3	5
10		rs3891585	2:66756976:A:G	lead	2	66756976	2:66756976:A:G	1	MEIS1-AS3;C1D;PPP3R1;ETAA1;LINC02245;ACTR2;AFTPH;LINC01829;SPRED2;GKN1;CEP68;VPS54	MEIS1-AS3	5
10		rs115610217	2:66794095:C:T	conditional	2	66794095	2:66794095:C:T	1	MEIS1-AS3;C1D;ETAA1;LINC01829;AFTPH;PPP3R1;PROKR1;VPS54;MIR3126;SPRED2;ACTR2;ARHGAP25	MEIS1-AS3	5
10		rs11896827	2:67042071:C:T	conditional	2	67042071	2:67042218:C:G	0.983815	MIR4778;ETAA1;PPP3R1;C1D;SPRED2;ACTR2;AFTPH;LINC01829;ARHGAP25;PROKR1	MIR4778	2c
11	TMEM182	rs2732814	2:103415494:A:G	lead	2	103415494	2:103412817:C:T	0.991283	TMEM182;MFSD9;CHST10;SNORD89	TMEM182	2b
11		rs2732814	2:103415494:A:G	lead	2	103415494	2:103405529:A:G	0.992071	TMEM182;MFSD9;CHST10;SNORD89	TMEM182	3a
11		rs2732814	2:103415494:A:G	lead	2	103415494	2:103420157:A:G	0.989687	TMEM182;MFSD9;CHST10;SNORD89	TMEM182	3a
11		rs2732814	2:103415494:A:G	lead	2	103415494	2:103404980:D:I	0.99206	TMEM182;MFSD9;CHST10;SNORD89	TMEM182	4
11		rs2732814	2:103415494:A:G	lead	2	103415494	2:103420231:A:G	0.825881	TMEM182;MFSD9;CHST10;SNORD89	TMEM182	4
11		rs2732814	2:103415494:A:G	lead	2	103415494	2:103390000:D:I	0.843727	TMEM182;MRPS9;RFX8;MAP4K4	TMEM182	5
11		rs2732814	2:103415494:A:G	lead	2	103415494	2:103396430:C:G	0.878459	TMEM182;MRPS9;RFX8;MAP4K4	TMEM182	5
11		rs2732814	2:103415494:A:G	lead	2	103415494	2:103407586:A:G	0.994438	TMEM182;MFSD9;CHST10;SNORD89	TMEM182	5
11		rs2732814	2:103415494:A:G	lead	2	103415494	2:103409627:A:G	0.99841	TMEM182;MFSD9;CHST10;SNORD89	TMEM182	5
11		rs2732814	2:103415494:A:G	lead	2	103415494	2:103410479:C:T	0.999205	TMEM182;MFSD9;CHST10;SNORD89	TMEM182	5
11		rs2732814	2:103415494:A:G	lead	2	103415494	2:103412060:C:T	0.998412	TMEM182;MFSD9;CHST10;SNORD89	TMEM182	5
11		rs2732814	2:103415494:A:G	lead	2	103415494	2:103412425:G:T	0.999206	TMEM182;MFSD9;CHST10;SNORD89	TMEM182	5
11		rs2732814	2:103415494:A:G	lead	2	103415494	2:103419659:A:G	0.940679	TMEM182;MFSD9;CHST10;SNORD89	TMEM182	5
11		rs2540277	2:103426177:C:T	conditional	2	103426177	2:103426177:C:T	1	TMEM182;MFSD9;CHST10;SNORD89	TMEM182	3a
12	FIGN	rs1531447	2:164347757:A:C	lead	2	164347757	2:164380849:D:I	0.809429	SCN3A;AHCTF1P1;GRB14;SNORA70F;TTC21B	COBLL1;SCN3A	5
12		rs1531447	2:164347757:A:C	lead	2	164347757	2:164381648:C:G	0.863456	SCN3A;AHCTF1P1;GRB14;SNORA70F;TTC21B	COBLL1;SCN3A	5
12		rs1531447	2:164347757:A:C	lead	2	164347757	2:164392993:A:T	0.829687	SCN3A;AHCTF1P1;GRB14;SNORA70F;TTC21B	COBLL1;SCN3A	5
12		rs1531447	2:164347757:A:C	lead	2	164347757	2:164347757:A:C	1	COBLL1;GRB14;SNORA70F;FIGN;SCN1A;SCN3A;GALNT3;SCN2A;SLC4A10;SCN7A;TTC21B-AS1	COBLL1;SCN3A	5
12		rs970953	2:164514239:C:T	conditional	2	164514239	2:164538904:D:I	0.879667	CSRNP3;GRB14;COBLL1;TTC21B	CSRNP3	5
12		rs970953	2:164514239:C:T	conditional	2	164514239	2:164539038:C:G	0.879667	CSRNP3;GRB14;COBLL1;TTC21B	CSRNP3	5
13	TTN/ CCDC141	rs7564036	2:179704973:A:G	conditional	2	179704973	2:179622850:C:T	0.876337	TTN;CCDC141;SESTD1;CERKL;ZNF385B;MIR1258	TTN	5
13		rs17362588	2:179721046:A:G	conditional	2	179721046	2:179770998:A:G	0.874339	TTN;SESTD1;CCDC141;MIR1258;CERKL;HAGLR	TTN	5
14	EOMES	rs612129	3:27987232:A:C	lead	3	27987232	3:27981652:G:T	0.845292	NEK10;ZCWPW2;CMC1;NGLY1;SLC4A7	NEK10	4
15	SCN5A/ SCN10A	rs6801957	3:38767315:C:T	lead	3	38767315	3:38767315:C:T	1	SCN5A;SCN11A;OXSR1;XYLB;EXOG;ACVR2B;CTNNB1;MOBP;WDR48;STAC	SCN5A	4
15		rs6801957	3:38767315:C:T	lead	3	38767315	3:38771925:C:G	0.96309	SCN5A;SCN11A;OXSR1;XYLB;EXOG;ACVR2B;CTNNB1;MOBP;WDR48;STAC	SCN5A	4
15		rs6801957	3:38767315:C:T	lead	3	38767315	3:38777554:G:T	0.940435	SCN5A;SCN11A;OXSR1;XYLB;EXOG;ACVR2B;CTNNB1;MOBP;WDR48;STAC	SCN5A	5
15		rs143756608	3:37481631:D:I	conditional	3	37481631	3:37481631:D:I	1	MIR26A1;PLCD1;CTDSPL;XIRP1	MIR26A1	5
15		rs11707849	3:37671815:C:T	conditional	3	37671815	3:37855067:A:G	1	ITGA9;MIR26A1;C3orf35;GOLGA4;ACAA1	ITGA9	4
15		rs11707849	3:37671815:C:T	conditional	3	37671815	3:37653677:C:T	1	C3orf35;ITGA9	ITGA9	5
15		rs2364658	3:37789382:C:G	conditional	3	37789382	3:37777368:C:T	0.851101	ITGA9;C3orf35;GOLGA4;MIR26A1;MLH1;EPM2AIP1	ITGA9	5
15		rs192231913	3:37987685:C:T	conditional	3	37987685	3:37987685:C:T	1	MIR26A1;GOLGA4;C3orf35;EXOG;ITGA9	MIR26A1	4
15		rs192231913	3:37987685:C:T	conditional	3	37987685	3:38050815:A:G	1	ITGA9;SCN5A;LRRFIP2	MIR26A1	5
15		rs186985210	3:38430346:C:T	conditional	3	38430346	3:37124083:A:C	1	MLH1;LRRFIP2;C3orf35;MIR26A1	MLH1	3a
15		rs186985210	3:38430346:C:T	conditional	3	38430346	3:36459885:G:T	1	CX3CR1;STAC	MLH1	5
15		rs186985210	3:38430346:C:T	conditional	3	38430346	3:37593690:A:G	1	ITGA9;MIR26A1	MLH1	5
15		rs186985210	3:38430346:C:T	conditional	3	38430346	3:37713709:C:T	1	ITGA9;MIR26A1;C3orf35;GOLGA4;MLH1	MLH1	5
15		rs186985210	3:38430346:C:T	conditional	3	38430346	3:37860559:A:G	1	ITGA9;MIR26A1;C3orf35;GOLGA4;ACAA1	MLH1	5
15		rs186985210	3:38430346:C:T	conditional	3	38430346	3:38501339:G:T	1	ACAA1;CCR8;XYLB	MLH1	5
15		rs186985210	3:38430346:C:T	conditional	3	38430346	3:39724002:A:T	1	MYRIP;ZNF621;ENTPD3	MLH1	5
15		rs186985210	3:38430346:C:T	conditional	3	38430346	3:40169832:C:G	1	TRAK1;ULK4;MOBP;CCDC13-AS1;ZNF662	MLH1	5
15		rs150713732	3:38484841:A:C	conditional	3	38484841	3:38484841:A:C	1	ACAA1;CCR8;XYLB	ACAA1;SCN5A	5
15		rs150713732	3:38484841:A:C	conditional	3	38484841	3:38484838:G:T	1	ACAA1;CCR8;XYLB	ACAA1;SCN5A	5
15		rs150713732	3:38484841:A:C	conditional	3	38484841	3:38484840:G:T	1	ACAA1;CCR8;XYLB	ACAA1;SCN5A	5
15		rs150713732	3:38484841:A:C	conditional	3	38484841	3:38584650:A:T	0.810142	SCN5A;CTNNB1	ACAA1;SCN5A	5
15		rs148458221	3:38496634:A:G	conditional	3	38496634	3:38496634:A:G	1	ACAA1;CCR8;XYLB	ACAA1	2b
15		rs503327	3:38524363:C:T	conditional	3	38524363	3:38524363:C:T	1	SCN5A;OXSR1;SCN11A;ACAA1;XYLB;TTC21A;WDR48	SCN5A	5
15		rs12497866	3:38575865:C:T	conditional	3	38575865	3:38578264:A:G	0.974933	SCN5A;CTNNB1	SCN5A	4
15		rs12497866	3:38575865:C:T	conditional	3	38575865	3:38576390:C:T	0.970641	SCN5A;CTNNB1	SCN5A	5
15		rs12497866	3:38575865:C:T	conditional	3	38575865	3:38577362:A:C	0.994999	SCN5A;CTNNB1	SCN5A	5
15		rs12497866	3:38575865:C:T	conditional	3	38575865	3:38577679:A:G	0.974933	SCN5A;CTNNB1	SCN5A	5
15		rs12497866	3:38575865:C:T	conditional	3	38575865	3:38581435:A:G	0.975014	SCN5A;CTNNB1	SCN5A	5
15		rs12497866	3:38575865:C:T	conditional	3	38575865	3:38583041:C:T	0.994999	SCN5A;CTNNB1	SCN5A	5
15		rs12497866	3:38575865:C:T	conditional	3	38575865	3:38584647:D:I	0.994999	SCN5A;CTNNB1	SCN5A	5
15		rs12497866	3:38575865:C:T	conditional	3	38575865	3:38585434:C:T	0.950642	SCN5A;CTNNB1	SCN5A	5
15		rs12497866	3:38575865:C:T	conditional	3	38575865	3:38586706:A:C	0.964953	SCN5A;CTNNB1	SCN5A	5
15		rs12497866	3:38575865:C:T	conditional	3	38575865	3:38587093:C:T	0.980067	SCN5A;CTNNB1	SCN5A	5
15		rs12497866	3:38575865:C:T	conditional	3	38575865	3:38587308:D:I	0.960014	SCN5A;CTNNB1	SCN5A	5
15		rs12497866	3:38575865:C:T	conditional	3	38575865	3:38589408:C:T	0.960014	SCN5A;CTNNB1	SCN5A	5
15		rs12497866	3:38575865:C:T	conditional	3	38575865	3:38590275:A:G	0.97508	SCN5A;CTNNB1	SCN5A	5
15		rs12497866	3:38575865:C:T	conditional	3	38575865	3:38575865:C:T	1	SCN5A;CTNNB1	SCN5A	5
15		rs58454174	3:38615533:C:T	conditional	3	38615533	3:38647047:C:T	0.888211	-	SCN5A	2b
15		rs58454174	3:38615533:C:T	conditional	3	38615533	3:38630311:A:C	0.926784	SCN5A;SCN11A;EXOG	SCN5A	5
15		rs58454174	3:38615533:C:T	conditional	3	38615533	3:38638390:C:G	0.934121	SCN5A;SCN11A;EXOG	SCN5A	5
15		rs58454174	3:38615533:C:T	conditional	3	38615533	3:38646423:C:T	0.845503	-	SCN5A	5
15		rs58454174	3:38615533:C:T	conditional	3	38615533	3:38647642:G:T	0.888211	-	SCN5A	5
15		rs58454174	3:38615533:C:T	conditional	3	38615533	3:38615533:C:T	1	SCN5A;SCN11A;EXOG	SCN5A	5
15		rs41312411	3:38621237:C:G	conditional	3	38621237	3:38621237:C:G	1	SCN5A;SCN11A;EXOG	SCN5A	5
15		rs41312411	3:38621237:C:G	conditional	3	38621237	3:38631723:D:I	0.959021	SCN5A;SCN11A;EXOG	SCN5A	5
15		rs41312411	3:38621237:C:G	conditional	3	38621237	3:38631838:C:T	0.967423	SCN5A;SCN11A;EXOG	SCN5A	5
15		rs41312411	3:38621237:C:G	conditional	3	38621237	3:38633923:C:G	0.967423	SCN5A;SCN11A;EXOG	SCN5A	5
15		rs71323670	3:38625154:C:T	conditional	3	38625154	3:38625154:C:T	1	SCN5A;SCN11A;EXOG	SCN5A	4
15		rs71323670	3:38625154:C:T	conditional	3	38625154	3:38624842:C:T	0.991982	SCN5A;SCN11A;EXOG	SCN5A	4
15		rs71323670	3:38625154:C:T	conditional	3	38625154	3:38627825:A:G	0.896625	SCN5A;SCN11A;EXOG	SCN5A	5
15		rs71323670	3:38625154:C:T	conditional	3	38625154	3:38645752:A:G	0.983988	-	SCN5A	5
15		rs71323670	3:38625154:C:T	conditional	3	38625154	3:38645999:C:T	0.983988	-	SCN5A	5
15		rs41314746	3:38675715:C:T	conditional	3	38675715	3:38675715:C:T	1	-	EXOG	4
15		rs41314746	3:38675715:C:T	conditional	3	38675715	3:38691175:C:T	1	EXOG;SCN11A;ACAA1;RPSA;OXSR1;MLH1;C3orf35;PLCD1;DLEC1;MYRIP;XYLB;GOLGA4;EPM2AIP1	EXOG	4
15		rs41314746	3:38675715:C:T	conditional	3	38675715	3:38671021:C:T	1	-	EXOG	5
15		rs41314746	3:38675715:C:T	conditional	3	38675715	3:38695871:A:G	1	EXOG;SCN11A;ACAA1;RPSA;OXSR1;MLH1;C3orf35;PLCD1;DLEC1;MYRIP;XYLB;GOLGA4;EPM2AIP1	EXOG	5
15		rs7427574	3:38684835:C:G	conditional	3	38684835	3:38684835:C:G	1	EXOG;SCN11A;ACAA1;RPSA;OXSR1;MLH1;C3orf35;PLCD1;DLEC1;MYRIP;XYLB;GOLGA4;EPM2AIP1	EXOG	5
15		rs7427574	3:38684835:C:G	conditional	3	38684835	3:38676579:D:I	0.824031	-	EXOG	5
15		rs7427574	3:38684835:C:G	conditional	3	38684835	3:38681356:C:T	0.921444	EXOG;SCN11A;ACAA1;RPSA;OXSR1;MLH1;C3orf35;PLCD1;DLEC1;MYRIP;XYLB;GOLGA4;EPM2AIP1	EXOG	5
15		rs7427574	3:38684835:C:G	conditional	3	38684835	3:38682271:A:T	0.992732	EXOG;SCN11A;ACAA1;RPSA;OXSR1;MLH1;C3orf35;PLCD1;DLEC1;MYRIP;XYLB;GOLGA4;EPM2AIP1	EXOG	5
15		rs7427574	3:38684835:C:G	conditional	3	38684835	3:38686192:C:T	1	EXOG;SCN11A;ACAA1;RPSA;OXSR1;MLH1;C3orf35;PLCD1;DLEC1;MYRIP;XYLB;GOLGA4;EPM2AIP1	EXOG	5
15		rs7427574	3:38684835:C:G	conditional	3	38684835	3:38686894:C:G	0.928398	EXOG;SCN11A;ACAA1;RPSA;OXSR1;MLH1;C3orf35;PLCD1;DLEC1;MYRIP;XYLB;GOLGA4;EPM2AIP1	EXOG	5
15		rs7427574	3:38684835:C:G	conditional	3	38684835	3:38687740:C:T	0.99275	EXOG;SCN11A;ACAA1;RPSA;OXSR1;MLH1;C3orf35;PLCD1;DLEC1;MYRIP;XYLB;GOLGA4;EPM2AIP1	EXOG	5
15		rs7373492	3:38687369:C:T	conditional	3	38687369	3:38687369:C:T	1	EXOG;SCN11A;ACAA1;RPSA;OXSR1;MLH1;C3orf35;PLCD1;DLEC1;MYRIP;XYLB;GOLGA4;EPM2AIP1	EXOG	5
15		rs7373492	3:38687369:C:T	conditional	3	38687369	3:38684397:A:T	1	EXOG;SCN11A;ACAA1;RPSA;OXSR1;MLH1;C3orf35;PLCD1;DLEC1;MYRIP;XYLB;GOLGA4;EPM2AIP1	EXOG	5
15		rs7373492	3:38687369:C:T	conditional	3	38687369	3:38699265:D:I	0.959527	EXOG;SCN11A;ACAA1;RPSA;OXSR1;MLH1;C3orf35;PLCD1;DLEC1;MYRIP;XYLB;GOLGA4;EPM2AIP1	EXOG	5
15		rs79271809	3:38712306:C:T	conditional	3	38712306	3:38722809:A:G	0.951618	SCN11A;EXOG;SCN5A;OXSR1;ITGA9;ACAA1;XYLB	SCN11A	5
15		rs75559840	3:38742389:A:G	conditional	3	38742389	3:38742389:A:G	1	SCN11A;EXOG;SCN5A;OXSR1;ITGA9;ACAA1;XYLB	SCN11A	5
15		rs9637536	3:38800873:A:G	conditional	3	38800873	3:38800873:A:G	1	SCN11A	SCN11A	5
15		rs9637536	3:38800873:A:G	conditional	3	38800873	3:38800182:C:T	1	SCN11A	SCN11A	5
17	SLC25A26	rs1084537	3:66362206:C:T	lead	3	66362206	3:66354911:C:G	0.82973	PSMD6-AS2;LRIG1;FAM19A4;PRICKLE2-AS2	PSMD6-AS2	5
17		rs1084537	3:66362206:C:T	lead	3	66362206	3:66354569:A:G	0.825888	PSMD6-AS2;LRIG1;FAM19A4;PRICKLE2-AS2	PSMD6-AS2	5
18	FRMD4B	rs6795775	3:69402801:C:T	lead	3	69402801	3:69403918:C:T	0.995997	FRMD4B;MITF;FOXP1;MIR1284;LINC00870;LRIG1	FRMD4B	1f
18		rs6795775	3:69402801:C:T	lead	3	69402801	3:69411596:G:T	0.841032	FRMD4B;MITF;FOXP1;MIR1284;LINC00870;LRIG1	FRMD4B	1f
18		rs6795775	3:69402801:C:T	lead	3	69402801	3:69413121:A:G	0.805134	FRMD4B;MITF;FOXP1;MIR1284;LINC00870;LRIG1	FRMD4B	1f
18		rs6795775	3:69402801:C:T	lead	3	69402801	3:69402923:G:T	0.948493	FRMD4B;MITF;FOXP1;MIR1284;LINC00870;LRIG1	FRMD4B	2b
18		rs6795775	3:69402801:C:T	lead	3	69402801	3:69413324:A:G	0.800721	FRMD4B;MITF;FOXP1;MIR1284;LINC00870;LRIG1	FRMD4B	2b
18		rs6795775	3:69402801:C:T	lead	3	69402801	3:69413329:G:T	0.866013	FRMD4B;MITF;FOXP1;MIR1284;LINC00870;LRIG1	FRMD4B	2b
18		rs6795775	3:69402801:C:T	lead	3	69402801	3:69402801:C:T	1	FRMD4B;MITF;FOXP1;MIR1284;LINC00870;LRIG1	FRMD4B	3a
18		rs6795775	3:69402801:C:T	lead	3	69402801	3:69404178:D:I	0.871845	FRMD4B;MITF;FOXP1;MIR1284;LINC00870;LRIG1	FRMD4B	3a
18		rs6795775	3:69402801:C:T	lead	3	69402801	3:69402165:C:T	0.969903	FRMD4B;MITF;FOXP1;MIR1284;LINC00870;LRIG1	FRMD4B	5
18		rs6795775	3:69402801:C:T	lead	3	69402801	3:69402489:G:T	0.950483	FRMD4B;MITF;FOXP1;MIR1284;LINC00870;LRIG1	FRMD4B	5
18		rs6795775	3:69402801:C:T	lead	3	69402801	3:69404078:C:T	0.995997	FRMD4B;MITF;FOXP1;MIR1284;LINC00870;LRIG1	FRMD4B	5
18		rs6795775	3:69402801:C:T	lead	3	69402801	3:69404572:A:C	0.909816	FRMD4B;MITF;FOXP1;MIR1284;LINC00870;LRIG1	FRMD4B	5
18		rs6795775	3:69402801:C:T	lead	3	69402801	3:69404575:C:T	0.991341	FRMD4B;MITF;FOXP1;MIR1284;LINC00870;LRIG1	FRMD4B	5
18		rs6795775	3:69402801:C:T	lead	3	69402801	3:69406527:A:C	0.837853	FRMD4B;MITF;FOXP1;MIR1284;LINC00870;LRIG1	FRMD4B	5
18		rs6795775	3:69402801:C:T	lead	3	69402801	3:69406781:A:G	0.888719	FRMD4B;MITF;FOXP1;MIR1284;LINC00870;LRIG1	FRMD4B	5
18		rs6795775	3:69402801:C:T	lead	3	69402801	3:69406802:A:T	0.888719	FRMD4B;MITF;FOXP1;MIR1284;LINC00870;LRIG1	FRMD4B	5
18		rs6795775	3:69402801:C:T	lead	3	69402801	3:69411662:C:T	0.841649	FRMD4B;MITF;FOXP1;MIR1284;LINC00870;LRIG1	FRMD4B	5
18		rs6795775	3:69402801:C:T	lead	3	69402801	3:69413028:A:C	0.848126	FRMD4B;MITF;FOXP1;MIR1284;LINC00870;LRIG1	FRMD4B	5
19	FOXP1	rs74537277	3:71296578:C:G	lead	3	71296578	3:71296579:C:T	1	FOXP1;MITF;MIR1284;MIR3136;EBLN2;PPP4R2	FOXP1	4
19		rs74537277	3:71296578:C:G	lead	3	71296578	3:71296578:C:G	1	FOXP1;MITF;MIR1284;MIR3136;EBLN2;PPP4R2	FOXP1	4
19		rs74537277	3:71296578:C:G	lead	3	71296578	3:71296302:C:G	0.993225	FOXP1;MITF;MIR1284;MIR3136;EBLN2;PPP4R2	FOXP1	5
19		rs74537277	3:71296578:C:G	lead	3	71296578	3:71302918:A:C	0.857305	FOXP1;MITF;MIR1284;MIR3136;EBLN2;PPP4R2	FOXP1	5
20	PDZRN3	rs4677294	3:73554922:A:T	lead	3	73554922	3:73565946:D:I	0.824247	PDZRN3;LINC00870;PPP4R2;GXYLT2;FOXP1;EIF4E3	PDZRN3	4
20		rs4677294	3:73554922:A:T	lead	3	73554922	3:73554286:C:T	0.855375	PDZRN3;FOXP1;LINC00870;GXYLT2;EBLN2;EIF4E3;PPP4R2;MIR1284;LINC00960;CNTN3	PDZRN3	5
20		rs4677294	3:73554922:A:T	lead	3	73554922	3:73568127:A:T	0.886628	PDZRN3;LINC00870;PPP4R2;GXYLT2;FOXP1;EIF4E3	PDZRN3	5
20		rs6801287	3:73637638:C:T	conditional	3	73637638	3:73640392:A:T	0.985402	PDZRN3;LINC00870;EIF4E3;EBLN2	PDZRN3	3a
20		rs6801287	3:73637638:C:T	conditional	3	73637638	3:73651469:C:T	0.9658	PDZRN3;LINC00870;EIF4E3;EBLN2	PDZRN3	4
20		rs6801287	3:73637638:C:T	conditional	3	73637638	3:73637638:C:T	1	PDZRN3	PDZRN3	5
20		rs6801287	3:73637638:C:T	conditional	3	73637638	3:73639587:C:T	1	PDZRN3	PDZRN3	5
20		rs6801287	3:73637638:C:T	conditional	3	73637638	3:73640701:A:G	0.990244	PDZRN3;LINC00870;EIF4E3;EBLN2	PDZRN3	5
20		rs6801287	3:73637638:C:T	conditional	3	73637638	3:73640815:A:G	0.975737	PDZRN3;LINC00870;EIF4E3;EBLN2	PDZRN3	5
20		rs6801287	3:73637638:C:T	conditional	3	73637638	3:73641358:A:G	1	PDZRN3;LINC00870;EIF4E3;EBLN2	PDZRN3	5
20		rs6801287	3:73637638:C:T	conditional	3	73637638	3:73641630:A:G	0.975737	PDZRN3;LINC00870;EIF4E3;EBLN2	PDZRN3	5
20		rs6801287	3:73637638:C:T	conditional	3	73637638	3:73642931:C:T	0.975737	PDZRN3;LINC00870;EIF4E3;EBLN2	PDZRN3	5
20		rs4603898	3:73721093:A:G	conditional	3	73721093	3:73733397:A:T	0.87737	PDZRN3;EIF4E3;FOXP1	PDZRN3	5
20		rs586936	3:73862616:A:G	conditional	3	73862616	3:73862616:A:G	1	PDZRN3	PDZRN3	3a
21	PHLDB2	rs2137897	3:111643561:C:T	lead	3	111643561	3:111643561:C:T	1	PHLDB2;PLCXD2;TMPRSS7;NAA50;BTLA;USF3;ATG3;ZBTB20;SLC9C1;CD200R1;CCDC191;NECTIN3-AS1;DRD3;NEPRO	PHLDB2	4
21		rs2137897	3:111643561:C:T	lead	3	111643561	3:111649568:G:T	0.98611	PHLDB2;PLCXD2;TMPRSS7;NAA50;BTLA;USF3;ATG3;ZBTB20;SLC9C1;CD200R1;CCDC191;NECTIN3-AS1;DRD3;NEPRO	PHLDB2	5
21		rs2137897	3:111643561:C:T	lead	3	111643561	3:111649569:C:T	0.98611	PHLDB2;PLCXD2;TMPRSS7;NAA50;BTLA;USF3;ATG3;ZBTB20;SLC9C1;CD200R1;CCDC191;NECTIN3-AS1;DRD3;NEPRO	PHLDB2	5
21		rs10511302	3:111687756:C:T	conditional	3	111687756	3:111687756:C:T	1	PHLDB2;PLCXD2;TMPRSS7;CD200R1;CD200;NAA50;ATG3;CD96;SLC9C1;MIR4796;DRD3;ZBED2;CFAP44;NECTIN3-AS1;BTLA;USF3	PHLDB2	1f
21		rs10511302	3:111687756:C:T	conditional	3	111687756	3:111696795:D:I	0.905187	PHLDB2;PLCXD2;TMPRSS7;CD200R1;CD200;NAA50;ATG3;CD96;SLC9C1;MIR4796;DRD3;ZBED2;CFAP44;NECTIN3-AS1;BTLA;USF3	PHLDB2	3a
21		rs10511302	3:111687756:C:T	conditional	3	111687756	3:111690302:D:I	0.996161	PHLDB2;PLCXD2;TMPRSS7;CD200R1;CD200;NAA50;ATG3;CD96;SLC9C1;MIR4796;DRD3;ZBED2;CFAP44;NECTIN3-AS1;BTLA;USF3	PHLDB2	5
21		rs10511302	3:111687756:C:T	conditional	3	111687756	3:111690768:A:G	0.992322	PHLDB2;PLCXD2;TMPRSS7;CD200R1;CD200;NAA50;ATG3;CD96;SLC9C1;MIR4796;DRD3;ZBED2;CFAP44;NECTIN3-AS1;BTLA;USF3	PHLDB2	5
22	CCNL1	rs6441111	3:156821808:C:T	lead	3	156821808	3:156821808:C:T	1	SSR3;TIPARP;KCNAB1;PA2G4P4;KCNAB1-AS1;DHX36;KCNAB1-AS2;MLF1;SCHIP1;VEPH1	SSR3	2b
22		rs6441111	3:156821808:C:T	lead	3	156821808	3:156827227:C:T	0.81361	SSR3;TIPARP;KCNAB1;PA2G4P4;KCNAB1-AS1;DHX36;KCNAB1-AS2;MLF1;SCHIP1;VEPH1	SSR3	4
24	PPARGC1A	rs2970854	4:23826958:G:T	lead	4	23826958	4:23826958:G:T	1	ZCCHC4;PPARGC1A;CCDC149;DHX15;MIR573;SOD3;SEL1L3;ANAPC4	ZCCHC4	5
24		rs11734408	4:23882519:A:G	conditional	4	23882519	4:23876186:A:G	0.921967	MIR573;SEPSECS;PPARGC1A;LGI2;ADGRA3;KCNIP4-IT1	MIR573	3a
24		rs11734408	4:23882519:A:G	conditional	4	23882519	4:23880985:C:T	0.987389	MIR573;SOD3;PPARGC1A;PI4K2B;CCDC149;ZCCHC4	MIR573	4
24		rs11734408	4:23882519:A:G	conditional	4	23882519	4:23887454:G:T	0.979021	MIR573;SOD3;PPARGC1A;PI4K2B;CCDC149;ZCCHC4	MIR573	5
24		rs11734408	4:23882519:A:G	conditional	4	23882519	4:23882519:A:G		MIR573;SOD3;PPARGC1A;PI4K2B;CCDC149;ZCCHC4	MIR573	5
25	ARHGAP24	rs2624021	4:86657420:A:T	lead	4	86657420	4:86683729:G:T	0.977994	ARHGAP24;MIR4451;HPSE;WDFY3	ARHGAP24	3a
25		rs2624021	4:86657420:A:T	lead	4	86657420	4:86699726:A:C	0.901971	ARHGAP24;MIR4451;HPSE;WDFY3	ARHGAP24	3a
25		rs2624021	4:86657420:A:T	lead	4	86657420	4:86663055:A:T	0.994839	ARHGAP24;PKD2;ABCG2;WDFY3	ARHGAP24	4
25		rs2624021	4:86657420:A:T	lead	4	86657420	4:86664940:A:T	0.828836	ARHGAP24;PKD2;ABCG2;WDFY3	ARHGAP24	4
25		rs2624021	4:86657420:A:T	lead	4	86657420	4:86683121:C:T	0.978735	ARHGAP24;MIR4451;HPSE;WDFY3	ARHGAP24	4
25		rs2624021	4:86657420:A:T	lead	4	86657420	4:86683560:C:G	0.825891	ARHGAP24;MIR4451;HPSE;WDFY3	ARHGAP24	4
25		rs2624021	4:86657420:A:T	lead	4	86657420	4:86634349:A:G	0.809503	ARHGAP24;ABCG2;MIR4451	ARHGAP24	5
25		rs2624021	4:86657420:A:T	lead	4	86657420	4:86639646:A:C	0.950165	ARHGAP24;ABCG2;MIR4451	ARHGAP24	5
25		rs2624021	4:86657420:A:T	lead	4	86657420	4:86644336:C:T	0.948768	ARHGAP24;PKD2;ABCG2;WDFY3	ARHGAP24	5
25		rs2624021	4:86657420:A:T	lead	4	86657420	4:86647657:G:T	0.949515	ARHGAP24;PKD2;ABCG2;WDFY3	ARHGAP24	5
25		rs2624021	4:86657420:A:T	lead	4	86657420	4:86660244:A:C	0.862917	ARHGAP24;PKD2;ABCG2;WDFY3	ARHGAP24	5
25		rs2624021	4:86657420:A:T	lead	4	86657420	4:86661377:D:I	0.917501	ARHGAP24;PKD2;ABCG2;WDFY3	ARHGAP24	5
25		rs2624021	4:86657420:A:T	lead	4	86657420	4:86674199:G:T	0.94843	ARHGAP24;PKD2;ABCG2;WDFY3	ARHGAP24	5
25		rs2624021	4:86657420:A:T	lead	4	86657420	4:86681216:D:I	0.988956	ARHGAP24;MIR4451;HPSE;WDFY3	ARHGAP24	5
25		rs2624021	4:86657420:A:T	lead	4	86657420	4:86690556:A:G	0.971385	ARHGAP24;MIR4451;HPSE;WDFY3	ARHGAP24	5
26	AFF1	rs442177	4:88030261:G:T	lead	4	88030261	4:88018408:A:G	0.861984	AFF1-AS1;AFF1;IBSP;DMP1;ABCG2;HSD17B11;WDFY3;MAPK10;KLHL8;PPM1K;SPP1;FAM13A	AFF1-AS1	2b
26		rs442177	4:88030261:G:T	lead	4	88030261	4:88008782:A:G	0.861951	AFF1-AS1;AFF1;IBSP;DMP1;ABCG2;HSD17B11;WDFY3;MAPK10;KLHL8;PPM1K;SPP1;FAM13A	AFF1-AS1	3a
26		rs442177	4:88030261:G:T	lead	4	88030261	4:88051908:A:G	0.856062	AFF1-AS1;AFF1;SPP1;NAP1L5;C4orf36;FAM13A;ABCG2;KLHL8;PTPN13;PPM1K	AFF1-AS1	3a
26		rs442177	4:88030261:G:T	lead	4	88030261	4:88000423:C:G	0.925272	AFF1-AS1;AFF1;IBSP;DMP1;ABCG2;HSD17B11;WDFY3;MAPK10;KLHL8;PPM1K;SPP1;FAM13A	AFF1-AS1	4
26		rs442177	4:88030261:G:T	lead	4	88030261	4:88008614:A:G	0.935852	AFF1-AS1;AFF1;IBSP;DMP1;ABCG2;HSD17B11;WDFY3;MAPK10;KLHL8;PPM1K;SPP1;FAM13A	AFF1-AS1	4
26		rs442177	4:88030261:G:T	lead	4	88030261	4:88018489:C:G	0.937501	AFF1-AS1;AFF1;IBSP;DMP1;ABCG2;HSD17B11;WDFY3;MAPK10;KLHL8;PPM1K;SPP1;FAM13A	AFF1-AS1	4
26		rs442177	4:88030261:G:T	lead	4	88030261	4:88021500:A:T	0.9417	AFF1-AS1;AFF1;IBSP;DMP1;ABCG2;HSD17B11;WDFY3;MAPK10;KLHL8;PPM1K;SPP1;FAM13A	AFF1-AS1	4
26		rs442177	4:88030261:G:T	lead	4	88030261	4:88023228:D:I	0.949208	AFF1-AS1;AFF1;IBSP;DMP1;ABCG2;HSD17B11;WDFY3;MAPK10;KLHL8;PPM1K;SPP1;FAM13A	AFF1-AS1	4
26		rs442177	4:88030261:G:T	lead	4	88030261	4:88040406:A:G	0.844379	AFF1-AS1;AFF1;SPP1;NAP1L5;C4orf36;FAM13A;ABCG2;KLHL8;PTPN13;PPM1K	AFF1-AS1	4
26		rs442177	4:88030261:G:T	lead	4	88030261	4:88052219:C:T	0.857207	AFF1-AS1;AFF1;SPP1;NAP1L5;C4orf36;FAM13A;ABCG2;KLHL8;PTPN13;PPM1K	AFF1-AS1	4
26		rs442177	4:88030261:G:T	lead	4	88030261	4:88005203:A:G	0.933814	AFF1-AS1;AFF1;IBSP;DMP1;ABCG2;HSD17B11;WDFY3;MAPK10;KLHL8;PPM1K;SPP1;FAM13A	AFF1-AS1	5
26		rs442177	4:88030261:G:T	lead	4	88030261	4:88027650:A:G	0.971648	AFF1-AS1;AFF1;IBSP;DMP1;ABCG2;HSD17B11;WDFY3;MAPK10;KLHL8;PPM1K;SPP1;FAM13A	AFF1-AS1	5
26		rs442177	4:88030261:G:T	lead	4	88030261	4:88049850:C:T	0.86485	AFF1-AS1;AFF1;SPP1;NAP1L5;C4orf36;FAM13A;ABCG2;KLHL8;PTPN13;PPM1K	AFF1-AS1	5
26		rs442177	4:88030261:G:T	lead	4	88030261	4:88030261:G:T	1	AFF1-AS1;AFF1;IBSP;DMP1;ABCG2;HSD17B11;WDFY3;MAPK10;KLHL8;PPM1K;SPP1;FAM13A	AFF1-AS1	5
27	CAMK2D	rs4834347	4:114425934:A:C	lead	4	114425934	4:114425934:A:C	1	CAMK2D;UGT8	CAMK2D	5
27		rs4834347	4:114425934:A:C	lead	4	114425934	4:114408111:C:T	0.976187	CAMK2D;UGT8	CAMK2D	5
29	FAT1	rs74772720	4:187623099:A:C	lead	4	187623099	4:187623099:A:C	1	FAT1;LINC01060;SORBS2;TRIML1	FAT1	5
29		rs74772720	4:187623099:A:C	lead	4	187623099	4:187623171:A:G	0.919863	FAT1;LINC01060;SORBS2;TRIML1	FAT1	5
29		rs74772720	4:187623099:A:C	lead	4	187623099	4:187623172:C:G	0.919863	FAT1;LINC01060;SORBS2;TRIML1	FAT1	5
29		rs74772720	4:187623099:A:C	lead	4	187623099	4:187627011:C:T	0.842466	FAT1;LINC01060;SORBS2;TRIML1	FAT1	5
29		rs74772720	4:187623099:A:C	lead	4	187623099	4:187630989:A:C	0.843053	FAT1;LINC01060;SORBS2;TRIML1	FAT1	5
29		rs74772720	4:187623099:A:C	lead	4	187623099	4:187635239:C:T	0.834393	FAT1;LINC01060;SORBS2;TRIML1	FAT1	5
29		rs2584345	4:187527818:C:T	conditional	4	187527818	4:187527818:C:T	1	LINC01060;ZFP42	LINC01060	2b
29		rs2584345	4:187527818:C:T	conditional	4	187527818	4:187533367:D:I	0.873523	LINC01060;ZFP42	LINC01060	5
29		rs2584345	4:187527818:C:T	conditional	4	187527818	4:187534542:D:I	0.859933	LINC01060;ZFP42	LINC01060	5
29		rs2584345	4:187527818:C:T	conditional	4	187527818	4:187536345:D:I	0.98559	LINC01060;ZFP42	LINC01060	5
29		rs2584345	4:187527818:C:T	conditional	4	187527818	4:187543654:C:T	0.971064	LINC01060;ZFP42	LINC01060	5
30	PAM	rs114555443	5:102128958:C:T	lead	5	102128958	5:102100576:C:T	0.932899	GIN1;PAM;NUDT12;C5orf30;PPIP5K2	GIN1;PAM	5
30		rs114555443	5:102128958:C:T	lead	5	102128958	5:102143311:A:G	0.936925	PAM	GIN1;PAM	5
31	NR3C1/ ARHGAP26	rs1037100	5:142938663:A:G	lead	5	142938663	5:142944230:C:G	0.993346	NR3C1;MIR5197;HMHB1;NDFIP1;ARHGAP26;ARHGAP26-AS1;SH3RF2;FGF1;PCDH12;DIAPH1;PLAC8L1;POU4F3	NR3C1	4
31		rs1037100	5:142938663:A:G	lead	5	142938663	5:142934764:C:T	0.961846	NR3C1;MIR5197;HMHB1;NDFIP1;ARHGAP26;ARHGAP26-AS1;SH3RF2;FGF1;PCDH12;DIAPH1;PLAC8L1;POU4F3	NR3C1	4
31		rs1037100	5:142938663:A:G	lead	5	142938663	5:142938663:A:G	1	NR3C1;MIR5197;HMHB1;NDFIP1;ARHGAP26;ARHGAP26-AS1;SH3RF2;FGF1;PCDH12;DIAPH1;PLAC8L1;POU4F3	NR3C1	5
32	NKX2-5/ ATP6V0E1/ C5orf41/ BNIP1/ CREBRF	rs29795	5:172577403:A:G	lead	5	172577403	5:172566959:D:I	0.95639	CPEB4;ATP6V0E1;FGF18;NKX2-5;SNORA74B;CREBRF;LOC285593;NEURL1B;UBTD2;SH3PXD2B;C5orf47	BNIP1;CPEB4	4
32		rs29795	5:172577403:A:G	lead	5	172577403	5:172481089:C:T	0.81994	BNIP1;SH3PXD2B;LOC285593;DUSP1	BNIP1;CPEB4	4
32		rs29795	5:172577403:A:G	lead	5	172577403	5:172484041:C:T	0.910012	BNIP1;SH3PXD2B;LOC285593;DUSP1	BNIP1;CPEB4	4
32		rs29795	5:172577403:A:G	lead	5	172577403	5:172480336:C:T	0.811019	BNIP1;SH3PXD2B;LOC285593;DUSP1	BNIP1;CPEB4	5
32		rs29795	5:172577403:A:G	lead	5	172577403	5:172482382:D:I	0.934166	BNIP1;SH3PXD2B;LOC285593;DUSP1	BNIP1;CPEB4	5
32		rs29795	5:172577403:A:G	lead	5	172577403	5:172486169:A:G	0.944642	BNIP1;SH3PXD2B;LOC285593;DUSP1	BNIP1;CPEB4	5
32		rs29795	5:172577403:A:G	lead	5	172577403	5:172487895:C:G	0.946128	BNIP1;SH3PXD2B;LOC285593;DUSP1	BNIP1;CPEB4	5
32		rs29795	5:172577403:A:G	lead	5	172577403	5:172492449:C:T	0.957975	BNIP1;SH3PXD2B;LOC285593;DUSP1	BNIP1;CPEB4	5
32		rs29795	5:172577403:A:G	lead	5	172577403	5:172499424:A:G	0.953403	BNIP1;SH3PXD2B;LOC285593;DUSP1	BNIP1;CPEB4	5
32		rs29795	5:172577403:A:G	lead	5	172577403	5:172499587:A:G	0.953403	BNIP1;SH3PXD2B;LOC285593;DUSP1	BNIP1;CPEB4	5
32		rs29795	5:172577403:A:G	lead	5	172577403	5:172518874:A:G	0.953398	BNIP1;SH3PXD2B;LOC285593;DUSP1	BNIP1;CPEB4	5
32		rs29795	5:172577403:A:G	lead	5	172577403	5:172528551:A:G	0.957168	ATP6V0E1;CPEB4;SNORA74B;SH3PXD2B;LINC01951;LOC285593;GABRP;DUSP1	BNIP1;CPEB4	5
32		rs29795	5:172577403:A:G	lead	5	172577403	5:172528699:A:G	0.957199	ATP6V0E1;CPEB4;SNORA74B;SH3PXD2B;LINC01951;LOC285593;GABRP;DUSP1	BNIP1;CPEB4	5
32		rs29795	5:172577403:A:G	lead	5	172577403	5:172529791:C:T	0.957939	ATP6V0E1;CPEB4;SNORA74B;SH3PXD2B;LINC01951;LOC285593;GABRP;DUSP1	BNIP1;CPEB4	5
32		rs29795	5:172577403:A:G	lead	5	172577403	5:172530477:A:G	0.957939	ATP6V0E1;CPEB4;SNORA74B;SH3PXD2B;LINC01951;LOC285593;GABRP;DUSP1	BNIP1;CPEB4	5
32		rs29795	5:172577403:A:G	lead	5	172577403	5:172530561:C:T	0.957939	ATP6V0E1;CPEB4;SNORA74B;SH3PXD2B;LINC01951;LOC285593;GABRP;DUSP1	BNIP1;CPEB4	5
32		rs29795	5:172577403:A:G	lead	5	172577403	5:172558196:A:G	0.956435	ATP6V0E1;CPEB4;SNORA74B;SH3PXD2B;LINC01951;LOC285593;GABRP;DUSP1	BNIP1;CPEB4	5
32		rs29795	5:172577403:A:G	lead	5	172577403	5:172570220:C:T	0.977687	CPEB4;ATP6V0E1;FGF18;NKX2-5;SNORA74B;CREBRF;LOC285593;NEURL1B;UBTD2;SH3PXD2B;C5orf47	BNIP1;CPEB4	5
32		rs29795	5:172577403:A:G	lead	5	172577403	5:172574590:D:I	0.977612	CPEB4;ATP6V0E1;FGF18;NKX2-5;SNORA74B;CREBRF;LOC285593;NEURL1B;UBTD2;SH3PXD2B;C5orf47	BNIP1;CPEB4	5
32		rs29795	5:172577403:A:G	lead	5	172577403	5:172586480:D:I	0.970274	CPEB4;ATP6V0E1;FGF18;NKX2-5;SNORA74B;CREBRF;LOC285593;NEURL1B;UBTD2;SH3PXD2B;C5orf47	BNIP1;CPEB4	5
32		rs393562	5:172494876:A:G	conditional	5	172494876	5:172420385:A:G	0.860057	BNIP1;CPEB4;SH3PXD2B;UBTD2;MSX2	BNIP1	5
32		rs954635	5:172647847:A:T	conditional	5	172647847	5:172662024:C:T	0.885094	BNIP1;SH3PXD2B;SNORA74B;LOC285593;DUSP1;UBTD2;CPEB4	BNIP1	2b
32		rs954635	5:172647847:A:T	conditional	5	172647847	5:172664163:A:G	0.861678	BNIP1;SH3PXD2B;SNORA74B;LOC285593;DUSP1;UBTD2;CPEB4	BNIP1	2b
32		rs954635	5:172647847:A:T	conditional	5	172647847	5:172669771:A:G	0.801732	BNIP1;SH3PXD2B;SNORA74B;LOC285593;DUSP1;UBTD2;CPEB4	BNIP1	3a
32		rs954635	5:172647847:A:T	conditional	5	172647847	5:172670745:G:T	0.802755	BNIP1;SH3PXD2B;SNORA74B;LOC285593;DUSP1;UBTD2;CPEB4	BNIP1	4
33	C6orf195	rs4959193	6:2575907:A:G	lead	6	2575907			FOXC1;GMDS-AS1	FOXC1	5
34	SLC35F1	rs11153730	6:118667522:C:T	lead	6	118667522	6:118639387:A:T	0.874033	PLN;BRD7P3;SELENOKP3;CEP85L;TBC1D32;NT5DC1;DSE;MIR548B;GOPC	PLN	5
34		rs11153730	6:118667522:C:T	lead	6	118667522	6:118634698:A:C	0.811833	PLN;BRD7P3;SELENOKP3;CEP85L;TBC1D32;NT5DC1;DSE;MIR548B;GOPC	PLN	5
34		rs11153730	6:118667522:C:T	lead	6	118667522	6:118635079:C:G	0.807804	PLN;BRD7P3;SELENOKP3;CEP85L;TBC1D32;NT5DC1;DSE;MIR548B;GOPC	PLN	5
34		rs11153730	6:118667522:C:T	lead	6	118667522	6:118642268:D:I	0.870759	PLN;BRD7P3;SELENOKP3;KPNA5;CEP85L;ASF1A;GOPC;FAM162B;COL10A1;RFX6;RSPH4A	PLN	5
34		rs794856	6:119011982:G:T	conditional	6	119011982	6:119005471:C:T	1	SELENOKP3;DCBLD1;SLC35F1;GOPC;BRD7P3;NUS1;TRAPPC3L;FRK;ASF1A;ROS1;GJA1;RSPH4A;KPNA5	SELENOKP3	5
34		rs794856	6:119011982:G:T	conditional	6	119011982	6:119003236:D:I	1	SELENOKP3;DCBLD1;SLC35F1;GOPC;BRD7P3;NUS1;TRAPPC3L;FRK;ASF1A;ROS1;GJA1;RSPH4A;KPNA5	SELENOKP3	5
35	GJA1	rs7759673	6:121771621:A:T	conditional	6	121771621	6:121781390:C:T	0.916132	HSF2;SERINC1	HSF2	3a
35		rs7759673	6:121771621:A:T	conditional	6	121771621	6:121778862:G:T	0.919433	HSF2;SERINC1	HSF2	5
35		rs7759673	6:121771621:A:T	conditional	6	121771621	6:121771621:A:T	1	HSF2;SERINC1	HSF2	5
35		rs35299721	6:123738460:D:I	conditional	6	123738460	6:123738460:D:I	1	TRDN;TPD52L1;FABP7;NCOA7;RNF217;NKAIN2;PKIB;HEY2;HSF2;TRMT11	CLVS2;TRDN	5
35		rs35299721	6:123738460:D:I	conditional	6	123738460	6:123705043:A:G	0.896102	CLVS2;TPD52L1;PKIB	CLVS2;TRDN	5
36	TBX20/ HERPUD2	rs235397	7:35372749:C:T	conditional	7	35372749	7:35377407:A:G	0.980598	LOC401324;NPSR1-AS1;BBS9;DPY19L2P1;NPSR1;MIR1200	LOC401324	5
36		rs235397	7:35372749:C:T	conditional	7	35372749	7:35372040:A:G	0.919657	LOC401324;NPSR1-AS1;BBS9;DPY19L2P1;NPSR1;MIR1200	LOC401324	5
36		rs235397	7:35372749:C:T	conditional	7	35372749	7:35372134:D:I	0.947708	LOC401324;NPSR1-AS1;BBS9;DPY19L2P1;NPSR1;MIR1200	LOC401324	5
37	CAV1/ CAV2	rs3807989	7:116186241:A:G	lead	7	116186241	7:116186241:A:G	1	CAV2;TES;CAPZA2;MDFIC;MET;TFEC;ST7;LSM8	CAV2	3a
37		rs3807989	7:116186241:A:G	lead	7	116186241	7:116198621:A:G	0.976314	CAV2;TES;CAPZA2;MDFIC;MET;TFEC;ST7;LSM8	CAV2	5
37		rs36199027	7:116050535:C:T	conditional	7	116050535	7:116078382:A:T	0.973083	CAPZA2;CAV2;CAV1;TES	CAPZA2;CAV2;CAV1	2b
37		rs36199027	7:116050535:C:T	conditional	7	116050535	7:116083544:C:T	0.973083	CAV2;TES;CAV1;CAPZA2;TFEC;FOXP2;MET;MDFIC	CAPZA2;CAV2;CAV1	2b
37		rs36199027	7:116050535:C:T	conditional	7	116050535	7:116135920:D:I	0.959338	CAV1;TES;CAV2;CAPZA2;MET;MDFIC;FOXP2;TFEC;ST7;ST7-AS2;MIR3666	CAPZA2;CAV2;CAV1	2b
37		rs36199027	7:116050535:C:T	conditional	7	116050535	7:116142458:A:G	0.922866	CAV1;TES;CAV2;CAPZA2;MET;MDFIC;FOXP2;TFEC;ST7;ST7-AS2;MIR3666	CAPZA2;CAV2;CAV1	2b
37		rs36199027	7:116050535:C:T	conditional	7	116050535	7:116075363:A:G	0.973083	CAPZA2;CAV2;CAV1;TES	CAPZA2;CAV2;CAV1	3a
37		rs36199027	7:116050535:C:T	conditional	7	116050535	7:116090300:A:G	0.973083	CAV2;TES;CAV1;CAPZA2;TFEC;FOXP2;MET;MDFIC	CAPZA2;CAV2;CAV1	3a
37		rs36199027	7:116050535:C:T	conditional	7	116050535	7:116101588:A:G	0.973083	CAV2;TES;CAV1;CAPZA2;TFEC;FOXP2;MET;MDFIC	CAPZA2;CAV2;CAV1	3a
37		rs36199027	7:116050535:C:T	conditional	7	116050535	7:116104867:A:T	0.973083	CAV2;TES;CAV1;CAPZA2;TFEC;FOXP2;MET;MDFIC	CAPZA2;CAV2;CAV1	3a
37		rs36199027	7:116050535:C:T	conditional	7	116050535	7:116104911:C:G	0.973083	CAV2;TES;CAV1;CAPZA2;TFEC;FOXP2;MET;MDFIC	CAPZA2;CAV2;CAV1	3a
37		rs36199027	7:116050535:C:T	conditional	7	116050535	7:116106360:C:T	0.973083	CAV2;TES;CAV1;CAPZA2;TFEC;FOXP2;MET;MDFIC	CAPZA2;CAV2;CAV1	3a
37		rs36199027	7:116050535:C:T	conditional	7	116050535	7:116106361:D:I	0.973083	CAV2;TES;CAV1;CAPZA2;TFEC;FOXP2;MET;MDFIC	CAPZA2;CAV2;CAV1	3a
37		rs36199027	7:116050535:C:T	conditional	7	116050535	7:116109293:A:G	0.973083	CAV2;TES;CAV1;CAPZA2;TFEC;FOXP2;MET;MDFIC	CAPZA2;CAV2;CAV1	3a
37		rs36199027	7:116050535:C:T	conditional	7	116050535	7:116117587:A:T	0.973083	CAV2;TES;CAV1;CAPZA2;TFEC;FOXP2;MET;MDFIC	CAPZA2;CAV2;CAV1	3a
37		rs36199027	7:116050535:C:T	conditional	7	116050535	7:116125834:G:T	0.973083	CAV1;TES;CAV2;CAPZA2;MET;MDFIC;FOXP2;TFEC;ST7;ST7-AS2;MIR3666	CAPZA2;CAV2;CAV1	3a
37		rs36199027	7:116050535:C:T	conditional	7	116050535	7:116187106:A:G	0.847144	CAV2;TES;CAPZA2;MDFIC;MET;TFEC;ST7;LSM8	CAPZA2;CAV2;CAV1	3a
37		rs36199027	7:116050535:C:T	conditional	7	116050535	7:116187690:A:C	0.860663	CAV2;TES;CAPZA2;MDFIC;MET;TFEC;ST7;LSM8	CAPZA2;CAV2;CAV1	3a
37		rs36199027	7:116050535:C:T	conditional	7	116050535	7:116039918:C:T	1	CAV2;CAV1;CAPZA2;TES;MET;ST7-AS2;ANKRD7;TFEC;FOXP2;MDFIC;CFTR	CAPZA2;CAV2;CAV1	4
37		rs36199027	7:116050535:C:T	conditional	7	116050535	7:116040828:C:G	1	CAPZA2;CAV2;CAV1;TES	CAPZA2;CAV2;CAV1	4
37		rs36199027	7:116050535:C:T	conditional	7	116050535	7:116078406:A:T	0.973083	CAPZA2;CAV2;CAV1;TES	CAPZA2;CAV2;CAV1	4
37		rs36199027	7:116050535:C:T	conditional	7	116050535	7:116095623:A:C	0.973083	CAV2;TES;CAV1;CAPZA2;TFEC;FOXP2;MET;MDFIC	CAPZA2;CAV2;CAV1	4
37		rs36199027	7:116050535:C:T	conditional	7	116050535	7:116108489:A:G	0.973083	CAV2;TES;CAV1;CAPZA2;TFEC;FOXP2;MET;MDFIC	CAPZA2;CAV2;CAV1	4
37		rs36199027	7:116050535:C:T	conditional	7	116050535	7:116117056:G:T	0.837524	CAV2;TES;CAV1;CAPZA2;TFEC;FOXP2;MET;MDFIC	CAPZA2;CAV2;CAV1	4
37		rs36199027	7:116050535:C:T	conditional	7	116050535	7:116132670:A:G	0.959338	CAV1;TES;CAV2;CAPZA2;MET;MDFIC;FOXP2;TFEC;ST7;ST7-AS2;MIR3666	CAPZA2;CAV2;CAV1	4
37		rs36199027	7:116050535:C:T	conditional	7	116050535	7:116134633:A:T	0.959338	CAV1;TES;CAV2;CAPZA2;MET;MDFIC;FOXP2;TFEC;ST7;ST7-AS2;MIR3666	CAPZA2;CAV2;CAV1	4
37		rs36199027	7:116050535:C:T	conditional	7	116050535	7:116134701:A:G	0.959338	CAV1;TES;CAV2;CAPZA2;MET;MDFIC;FOXP2;TFEC;ST7;ST7-AS2;MIR3666	CAPZA2;CAV2;CAV1	4
37		rs36199027	7:116050535:C:T	conditional	7	116050535	7:116140149:G:T	0.891552	CAV1;TES;CAV2;CAPZA2;MET;MDFIC;FOXP2;TFEC;ST7;ST7-AS2;MIR3666	CAPZA2;CAV2;CAV1	4
37		rs36199027	7:116050535:C:T	conditional	7	116050535	7:116150137:G:T	0.933644	CAV1;TES;CAV2;CAPZA2;MET;MDFIC;FOXP2;TFEC;ST7;ST7-AS2;MIR3666	CAPZA2;CAV2;CAV1	4
37		rs36199027	7:116050535:C:T	conditional	7	116050535	7:116178992:C:T	0.921231	CAV2;TES;CAPZA2;MDFIC;MET;TFEC;ST7;LSM8	CAPZA2;CAV2;CAV1	4
37		rs36199027	7:116050535:C:T	conditional	7	116050535	7:116182232:C:G	0.921231	CAV2;TES;CAPZA2;MDFIC;MET;TFEC;ST7;LSM8	CAPZA2;CAV2;CAV1	4
37		rs36199027	7:116050535:C:T	conditional	7	116050535	7:116200380:A:G	0.860663	TES;CAV1;CAV2;TFEC;CAPZA2;MET;ST7;ST7-AS2;PPP1R3A;FOXP2;MDFIC	CAPZA2;CAV2;CAV1	4
37		rs36199027	7:116050535:C:T	conditional	7	116050535	7:116068266:A:C	0.973083	CAPZA2;CAV2;CAV1;TES	CAPZA2;CAV2;CAV1	5
37		rs36199027	7:116050535:C:T	conditional	7	116050535	7:116079711:C:T	0.973083	CAPZA2;CAV2;CAV1;TES	CAPZA2;CAV2;CAV1	5
37		rs36199027	7:116050535:C:T	conditional	7	116050535	7:116100384:A:G	0.973083	CAV2;TES;CAV1;CAPZA2;TFEC;FOXP2;MET;MDFIC	CAPZA2;CAV2;CAV1	5
37		rs36199027	7:116050535:C:T	conditional	7	116050535	7:116100844:G:T	0.973083	CAV2;TES;CAV1;CAPZA2;TFEC;FOXP2;MET;MDFIC	CAPZA2;CAV2;CAV1	5
37		rs36199027	7:116050535:C:T	conditional	7	116050535	7:116104045:C:T	0.973083	CAV2;TES;CAV1;CAPZA2;TFEC;FOXP2;MET;MDFIC	CAPZA2;CAV2;CAV1	5
37		rs36199027	7:116050535:C:T	conditional	7	116050535	7:116104454:A:G	0.973083	CAV2;TES;CAV1;CAPZA2;TFEC;FOXP2;MET;MDFIC	CAPZA2;CAV2;CAV1	5
37		rs36199027	7:116050535:C:T	conditional	7	116050535	7:116104458:A:G	0.973083	CAV2;TES;CAV1;CAPZA2;TFEC;FOXP2;MET;MDFIC	CAPZA2;CAV2;CAV1	5
37		rs36199027	7:116050535:C:T	conditional	7	116050535	7:116109019:A:G	0.973083	CAV2;TES;CAV1;CAPZA2;TFEC;FOXP2;MET;MDFIC	CAPZA2;CAV2;CAV1	5
37		rs36199027	7:116050535:C:T	conditional	7	116050535	7:116109062:G:T	0.973083	CAV2;TES;CAV1;CAPZA2;TFEC;FOXP2;MET;MDFIC	CAPZA2;CAV2;CAV1	5
37		rs36199027	7:116050535:C:T	conditional	7	116050535	7:116110375:C:G	0.973083	CAV2;TES;CAV1;CAPZA2;TFEC;FOXP2;MET;MDFIC	CAPZA2;CAV2;CAV1	5
37		rs36199027	7:116050535:C:T	conditional	7	116050535	7:116110732:C:T	0.973083	CAV2;TES;CAV1;CAPZA2;TFEC;FOXP2;MET;MDFIC	CAPZA2;CAV2;CAV1	5
37		rs36199027	7:116050535:C:T	conditional	7	116050535	7:116110768:C:T	0.973083	CAV2;TES;CAV1;CAPZA2;TFEC;FOXP2;MET;MDFIC	CAPZA2;CAV2;CAV1	5
37		rs36199027	7:116050535:C:T	conditional	7	116050535	7:116116687:C:T	0.973083	CAV2;TES;CAV1;CAPZA2;TFEC;FOXP2;MET;MDFIC	CAPZA2;CAV2;CAV1	5
37		rs36199027	7:116050535:C:T	conditional	7	116050535	7:116117896:C:T	0.973083	CAV2;TES;CAV1;CAPZA2;TFEC;FOXP2;MET;MDFIC	CAPZA2;CAV2;CAV1	5
37		rs36199027	7:116050535:C:T	conditional	7	116050535	7:116118336:A:G	0.973083	CAV2;TES;CAV1;CAPZA2;TFEC;FOXP2;MET;MDFIC	CAPZA2;CAV2;CAV1	5
37		rs36199027	7:116050535:C:T	conditional	7	116050535	7:116119002:A:G	0.973083	CAV2;TES;CAV1;CAPZA2;TFEC;FOXP2;MET;MDFIC	CAPZA2;CAV2;CAV1	5
37		rs36199027	7:116050535:C:T	conditional	7	116050535	7:116119345:G:T	0.973083	CAV2;TES;CAV1;CAPZA2;TFEC;FOXP2;MET;MDFIC	CAPZA2;CAV2;CAV1	5
37		rs36199027	7:116050535:C:T	conditional	7	116050535	7:116128270:A:G	0.959338	CAV1;TES;CAV2;CAPZA2;MET;MDFIC;FOXP2;TFEC;ST7;ST7-AS2;MIR3666	CAPZA2;CAV2;CAV1	5
37		rs36199027	7:116050535:C:T	conditional	7	116050535	7:116130783:C:G	0.959338	CAV1;TES;CAV2;CAPZA2;MET;MDFIC;FOXP2;TFEC;ST7;ST7-AS2;MIR3666	CAPZA2;CAV2;CAV1	5
37		rs36199027	7:116050535:C:T	conditional	7	116050535	7:116133246:A:G	0.959338	CAV1;TES;CAV2;CAPZA2;MET;MDFIC;FOXP2;TFEC;ST7;ST7-AS2;MIR3666	CAPZA2;CAV2;CAV1	5
37		rs36199027	7:116050535:C:T	conditional	7	116050535	7:116137049:G:T	0.946343	CAV1;TES;CAV2;CAPZA2;MET;MDFIC;FOXP2;TFEC;ST7;ST7-AS2;MIR3666	CAPZA2;CAV2;CAV1	5
37		rs36199027	7:116050535:C:T	conditional	7	116050535	7:116137677:A:G	0.946343	CAV1;TES;CAV2;CAPZA2;MET;MDFIC;FOXP2;TFEC;ST7;ST7-AS2;MIR3666	CAPZA2;CAV2;CAV1	5
37		rs36199027	7:116050535:C:T	conditional	7	116050535	7:116138569:C:T	0.946343	CAV1;TES;CAV2;CAPZA2;MET;MDFIC;FOXP2;TFEC;ST7;ST7-AS2;MIR3666	CAPZA2;CAV2;CAV1	5
37		rs36199027	7:116050535:C:T	conditional	7	116050535	7:116138576:C:T	0.946343	CAV1;TES;CAV2;CAPZA2;MET;MDFIC;FOXP2;TFEC;ST7;ST7-AS2;MIR3666	CAPZA2;CAV2;CAV1	5
37		rs36199027	7:116050535:C:T	conditional	7	116050535	7:116138599:C:T	0.946343	CAV1;TES;CAV2;CAPZA2;MET;MDFIC;FOXP2;TFEC;ST7;ST7-AS2;MIR3666	CAPZA2;CAV2;CAV1	5
37		rs36199027	7:116050535:C:T	conditional	7	116050535	7:116144369:C:T	0.933644	CAV1;TES;CAV2;CAPZA2;MET;MDFIC;FOXP2;TFEC;ST7;ST7-AS2;MIR3666	CAPZA2;CAV2;CAV1	5
37		rs36199027	7:116050535:C:T	conditional	7	116050535	7:116154783:C:T	0.933644	CAV1;TES;CAV2;CAPZA2;MET;MDFIC;FOXP2;TFEC;ST7;ST7-AS2;MIR3666	CAPZA2;CAV2;CAV1	5
37		rs36199027	7:116050535:C:T	conditional	7	116050535	7:116160022:A:G	0.933644	CAV2;TES;CAPZA2;MDFIC;MET;TFEC;ST7;LSM8	CAPZA2;CAV2;CAV1	5
37		rs36199027	7:116050535:C:T	conditional	7	116050535	7:116173046:C:T	0.921231	CAV2;TES;CAPZA2;MDFIC;MET;TFEC;ST7;LSM8	CAPZA2;CAV2;CAV1	5
37		rs36199027	7:116050535:C:T	conditional	7	116050535	7:116179834:A:G	0.921231	CAV2;TES;CAPZA2;MDFIC;MET;TFEC;ST7;LSM8	CAPZA2;CAV2;CAV1	5
37		rs36199027	7:116050535:C:T	conditional	7	116050535	7:116180735:A:C	0.921231	CAV2;TES;CAPZA2;MDFIC;MET;TFEC;ST7;LSM8	CAPZA2;CAV2;CAV1	5
37		rs36199027	7:116050535:C:T	conditional	7	116050535	7:116190469:A:G	0.860663	CAV2;TES;CAPZA2;MDFIC;MET;TFEC;ST7;LSM8	CAPZA2;CAV2;CAV1	5
37		rs36199027	7:116050535:C:T	conditional	7	116050535	7:116195841:A:G	0.860663	CAV2;TES;CAPZA2;MDFIC;MET;TFEC;ST7;LSM8	CAPZA2;CAV2;CAV1	5
37		rs36199027	7:116050535:C:T	conditional	7	116050535	7:116197572:A:T	0.860663	CAV2;TES;CAPZA2;MDFIC;MET;TFEC;ST7;LSM8	CAPZA2;CAV2;CAV1	5
38	MKLN1	rs35680304	7:130973495:C:T	lead	7	130973495	7:130973495:C:T	1	LINC-PINT;MIR29A;ZC3HC1;MKLN1;STRIP2	LINC-PINT	3a
38		rs35680304	7:130973495:C:T	lead	7	130973495	7:130963771:A:G	0.854785	LINC-PINT;MIR29A;ZC3HC1;MKLN1;STRIP2	LINC-PINT	5
38		rs35680304	7:130973495:C:T	lead	7	130973495	7:130964537:A:G	0.856944	LINC-PINT;MIR29A;ZC3HC1;MKLN1;STRIP2	LINC-PINT	5
39	FGFR1	rs881299	8:38332249:C:T	lead	8	38332249	8:38324426:A:C	0.883825	TACC1	TACC1	2b
39		rs881299	8:38332249:C:T	lead	8	38332249	8:38323765:C:G	0.890856	TACC1	TACC1	4
39		rs881299	8:38332249:C:T	lead	8	38332249	8:38325411:A:G	0.877105	TACC1	TACC1	4
39		rs881299	8:38332249:C:T	lead	8	38332249	8:38326046:A:G	0.876318	TACC1	TACC1	4
39		rs881299	8:38332249:C:T	lead	8	38332249	8:38326404:C:T	0.915482	TACC1	TACC1	4
39		rs881299	8:38332249:C:T	lead	8	38332249	8:38327806:D:I	0.902603	TACC1	TACC1	4
39		rs881299	8:38332249:C:T	lead	8	38332249	8:38329650:C:T	0.865389	TACC1	TACC1	4
39		rs881299	8:38332249:C:T	lead	8	38332249	8:38327308:G:T	0.877892	TACC1	TACC1	5
39		rs881299	8:38332249:C:T	lead	8	38332249	8:38327630:A:C	0.902603	TACC1	TACC1	5
39		rs881299	8:38332249:C:T	lead	8	38332249	8:38328302:A:G	0.904129	TACC1	TACC1	5
39		rs881299	8:38332249:C:T	lead	8	38332249	8:38340137:A:G	0.8347	TACC1	TACC1	5
40	ZFPM2	rs72671655	8:106347897:A:T	lead	8	106347897	8:106347897:A:T	1	ZFPM2;LRP12;OXR1;BAALC;ODF1	ZFPM2	3a
40		rs2342797	8:106324274:C:T	conditional	8	106324274	8:106338217:A:G	0.98515	ZFPM2;LRP12;OXR1;BAALC;ODF1	ZFPM2	5
40		rs2342797	8:106324274:C:T	conditional	8	106324274	8:106357522:C:T	0.96285	ZFPM2;LRP12;OXR1;BAALC;ODF1	ZFPM2	5
40		rs2342797	8:106324274:C:T	conditional	8	106324274	8:106381366:A:G	0.98515	ZFPM2	ZFPM2	5
40		rs7003261	8:106519305:C:T	conditional	8	106519305	8:106530523:G:T	0.952219	ZFPM2;ABRA;BAALC;LRP12;KLF10	ZFPM2	2b
40		rs7003261	8:106519305:C:T	conditional	8	106519305	8:106522973:D:I	0.961812	ZFPM2;ABRA;BAALC;LRP12;KLF10	ZFPM2	3a
40		rs7003261	8:106519305:C:T	conditional	8	106519305	8:106529881:C:G	0.952219	ZFPM2;ABRA;BAALC;LRP12;KLF10	ZFPM2	5
40		rs7003261	8:106519305:C:T	conditional	8	106519305	8:106528643:D:I	0.956892	ZFPM2;ABRA;BAALC;LRP12;KLF10	ZFPM2	5
40		rs7003261	8:106519305:C:T	conditional	8	106519305	8:106533330:A:G	0.957146	ZFPM2;ABRA;BAALC;LRP12;KLF10	ZFPM2	5
40		rs7003261	8:106519305:C:T	conditional	8	106519305	8:106533619:A:G	0.957146	ZFPM2;ABRA;BAALC;LRP12;KLF10	ZFPM2	5
40		rs7003261	8:106519305:C:T	conditional	8	106519305	8:106533629:D:I	0.957146	ZFPM2;ABRA;BAALC;LRP12;KLF10	ZFPM2	5
40		rs7003261	8:106519305:C:T	conditional	8	106519305	8:106521027:D:I	0.960756	ZFPM2;ABRA;BAALC;LRP12;KLF10	ZFPM2	5
40		rs7003261	8:106519305:C:T	conditional	8	106519305	8:106521845:A:G	0.961812	ZFPM2;ABRA;BAALC;LRP12;KLF10	ZFPM2	5
40		rs7003261	8:106519305:C:T	conditional	8	106519305	8:106523185:A:G	0.970811	ZFPM2;ABRA;BAALC;LRP12;KLF10	ZFPM2	5
40		rs7003261	8:106519305:C:T	conditional	8	106519305	8:106521091:A:T	0.980431	ZFPM2;ABRA;BAALC;LRP12;KLF10	ZFPM2	5
40		rs7003261	8:106519305:C:T	conditional	8	106519305	8:106533564:D:I	0.985266	ZFPM2;ABRA;BAALC;LRP12;KLF10	ZFPM2	5
40		rs7003261	8:106519305:C:T	conditional	8	106519305	8:106517072:A:G	0.990155	ZFPM2	ZFPM2	5
41	KLHL38	rs4871397	8:124635197:C:G	lead	8	124635197	8:124635197:C:G	1	TATDN1;MTSS1	TATDN1	4
41		rs17337621	8:124542519:C:G	conditional	8	124542519	8:124551122:A:G	0.960337	FAM91A1;KLHL38;TRMT12;RNF139;ANXA13;TMEM65;SQLE;ZNF572	FAM91A1	2b
41		rs17337621	8:124542519:C:G	conditional	8	124542519	8:124552133:C:T	0.960337	FAM91A1;KLHL38;TRMT12;RNF139;ANXA13;TMEM65;SQLE;ZNF572	FAM91A1	4
41		rs17337621	8:124542519:C:G	conditional	8	124542519	8:124554317:A:T	0.94155	FAM91A1;KLHL38;TRMT12;RNF139;ANXA13;TMEM65;SQLE;ZNF572	FAM91A1	4
41		rs17337621	8:124542519:C:G	conditional	8	124542519	8:124542519:C:G	1	FAM91A1;KLHL38;TRMT12;RNF139;ANXA13;TMEM65;SQLE;ZNF572	FAM91A1	4
41		rs17337621	8:124542519:C:G	conditional	8	124542519	8:124548626:A:G	1	FAM91A1;KLHL38;TRMT12;RNF139;ANXA13;TMEM65;SQLE;ZNF572	FAM91A1	5
41		rs17337621	8:124542519:C:G	conditional	8	124542519	8:124551975:A:G	0.960337	FAM91A1;KLHL38;TRMT12;RNF139;ANXA13;TMEM65;SQLE;ZNF572	FAM91A1	5
41		rs17337621	8:124542519:C:G	conditional	8	124542519	8:124554516:D:I	0.960337	FAM91A1;KLHL38;TRMT12;RNF139;ANXA13;TMEM65;SQLE;ZNF572	FAM91A1	5
41		rs17337621	8:124542519:C:G	conditional	8	124542519	8:124555246:C:T	0.960337	FAM91A1;KLHL38;TRMT12;RNF139;ANXA13;TMEM65;SQLE;ZNF572	FAM91A1	5
43	ZNF438	rs793090	10:31324285:A:G	lead	10	31324285	10:31321419:D:I	0.817582	ZEB1;ARHGAP12;MTPAP;EPC1	ZEB1	2a
43		rs793090	10:31324285:A:G	lead	10	31324285	10:31328126:A:G	0.979187	ZEB1;ARHGAP12;MTPAP;EPC1	ZEB1	3a
43		rs793090	10:31324285:A:G	lead	10	31324285	10:31323226:A:T	0.92053	ZEB1;ARHGAP12;MTPAP;EPC1	ZEB1	4
43		rs793090	10:31324285:A:G	lead	10	31324285	10:31325624:C:G	0.921263	ZEB1;ARHGAP12;MTPAP;EPC1	ZEB1	4
43		rs793090	10:31324285:A:G	lead	10	31324285	10:31324883:A:T	1	ZEB1;ARHGAP12;MTPAP;EPC1	ZEB1	5
43		rs793090	10:31324285:A:G	lead	10	31324285	10:31341885:A:G	0.847056	ZEB1;ARHGAP12;MTPAP;EPC1	ZEB1	5
43		rs793090	10:31324285:A:G	lead	10	31324285	10:31324285:A:G	1	ZEB1;ARHGAP12;MTPAP;EPC1	ZEB1	5
44	SYNPO2L	rs2395137	10:76847993:C:G	conditional	10	76847993	10:76878025:A:G	0.949203	AP3M1	AP3M1	2b
44		rs2395137	10:76847993:C:G	conditional	10	76847993	10:76899011:A:G	0.949203	AP3M1;CAMK2G;VCL;ADK;PLAU;FUT11;PPP3CB;NDST2	AP3M1	3a
44		rs2395137	10:76847993:C:G	conditional	10	76847993	10:76846378:C:T	0.811763	AP3M1	AP3M1	4
44		rs2395137	10:76847993:C:G	conditional	10	76847993	10:76848524:C:T	0.992058	AP3M1	AP3M1	4
44		rs2395137	10:76847993:C:G	conditional	10	76847993	10:76904137:A:G	0.949203	AP3M1;CAMK2G;VCL;ADK;PLAU;FUT11;PPP3CB;NDST2	AP3M1	4
44		rs2395137	10:76847993:C:G	conditional	10	76847993	10:76846870:A:G	0.816321	AP3M1	AP3M1	5
44		rs2395137	10:76847993:C:G	conditional	10	76847993	10:76853963:D:I	0.941937	AP3M1	AP3M1	5
44		rs2395137	10:76847993:C:G	conditional	10	76847993	10:76854564:C:T	1	AP3M1	AP3M1	5
44		rs2395137	10:76847993:C:G	conditional	10	76847993	10:76861680:C:T	0.972361	AP3M1	AP3M1	5
44		rs2395137	10:76847993:C:G	conditional	10	76847993	10:76879562:G:T	0.945572	AP3M1	AP3M1	5
44		rs2395137	10:76847993:C:G	conditional	10	76847993	10:76896562:C:T	0.949203	AP3M1;CAMK2G;VCL;ADK;PLAU;FUT11;PPP3CB;NDST2	AP3M1	5
44		rs2395137	10:76847993:C:G	conditional	10	76847993	10:76905698:A:T	0.949203	AP3M1;CAMK2G;VCL;ADK;PLAU;FUT11;PPP3CB;NDST2	AP3M1	5
44		rs2395137	10:76847993:C:G	conditional	10	76847993	10:76911816:D:I	0.938021	AP3M1;CAMK2G;VCL;ADK;PLAU;FUT11;PPP3CB;NDST2	AP3M1	5
44		rs2395137	10:76847993:C:G	conditional	10	76847993	10:76919809:D:I	0.949203	AP3M1;CAMK2G;VCL;ADK;PLAU;FUT11;PPP3CB;NDST2	AP3M1	5
44		rs2395137	10:76847993:C:G	conditional	10	76847993	10:76921068:C:T	0.949203	AP3M1;ADK;PLAU;PPP3CB	AP3M1	5
44		rs2395137	10:76847993:C:G	conditional	10	76847993	10:76925771:C:T	0.949203	AP3M1;ADK;PLAU;PPP3CB	AP3M1	5
44		rs2395137	10:76847993:C:G	conditional	10	76847993	10:76926703:C:T	0.949203	AP3M1;ADK;PLAU;PPP3CB	AP3M1	5
44		rs2395137	10:76847993:C:G	conditional	10	76847993	10:76944947:A:G	0.949203	AP3M1;ADK;PLAU;PPP3CB	AP3M1	5
44		rs1359037	10:77690754:C:T	conditional	10	77690754	10:77686741:C:G	0.994392	ZNF503-AS2;AP3M1;KCNMA1;POLR3A;LINC00856;LRMDA;FUT11	ZNF503-AS2	2a
44		rs2395137	10:76847993:C:G	conditional	10	76847993	10:76847993:C:G	1	AP3M1	AP3M1	5
45	ALDH18A1/ SORBS1	rs10882644	10:97388579:C:T	lead	10	97388579	10:97606224:A:C	0.903543	TCTN3;CCNJ;CYP2C19;HELLS;PDLIM1;R3HCC1L	SORBS1;PDLIM1;EXOC6;TCTN3;CC2D2B	1b
45		rs10882644	10:97388579:C:T	lead	10	97388579	10:97591297:C:T	0.922936	TCTN3;PDLIM1;ACSM6;CC2D2B;ENTPD1;R3HCC1L;ALDH18A1;SORBS1;ARHGAP19;SLC35G1;NOC3L;CCNJ;HELLS;PIK3AP1;FFAR4;ENTPD1-AS1	SORBS1;PDLIM1;EXOC6;TCTN3;CC2D2B	1d
45		rs10882644	10:97388579:C:T	lead	10	97388579	10:97365163:A:G	0.857096	SORBS1;PDLIM1;ACSM6;LGI1;HELLS;PIPSL;OPALIN;FFAR4;R3HCC1L;AVPI1;PYROXD2	SORBS1;PDLIM1;EXOC6;TCTN3;CC2D2B	1f
45		rs10882644	10:97388579:C:T	lead	10	97388579	10:97365458:C:T	0.86487	SORBS1;PDLIM1;ACSM6;LGI1;HELLS;PIPSL;OPALIN;FFAR4;R3HCC1L;AVPI1;PYROXD2	SORBS1;PDLIM1;EXOC6;TCTN3;CC2D2B	1f
45		rs10882644	10:97388579:C:T	lead	10	97388579	10:97369093:C:T	0.979396	SORBS1;PDLIM1;ACSM6;LGI1;HELLS;PIPSL;OPALIN;FFAR4;R3HCC1L;AVPI1;PYROXD2	SORBS1;PDLIM1;EXOC6;TCTN3;CC2D2B	1f
45		rs10882644	10:97388579:C:T	lead	10	97388579	10:97408603:A:C	0.975037	PDLIM1;SORBS1	SORBS1;PDLIM1;EXOC6;TCTN3;CC2D2B	1f
45		rs10882644	10:97388579:C:T	lead	10	97388579	10:97411680:A:G	0.972905	PDLIM1;SORBS1	SORBS1;PDLIM1;EXOC6;TCTN3;CC2D2B	1f
45		rs10882644	10:97388579:C:T	lead	10	97388579	10:97507473:C:T	0.908977	EXOC6;PYROXD2	SORBS1;PDLIM1;EXOC6;TCTN3;CC2D2B	1f
45		rs10882644	10:97388579:C:T	lead	10	97388579	10:97514188:C:T	0.908977	EXOC6;PYROXD2	SORBS1;PDLIM1;EXOC6;TCTN3;CC2D2B	1f
45		rs10882644	10:97388579:C:T	lead	10	97388579	10:97595696:G:T	0.905683	TCTN3;PDLIM1;ACSM6;CC2D2B;ENTPD1;R3HCC1L;ALDH18A1;SORBS1;ARHGAP19;SLC35G1;NOC3L;CCNJ;HELLS;PIK3AP1;FFAR4;ENTPD1-AS1	SORBS1;PDLIM1;EXOC6;TCTN3;CC2D2B	1f
45		rs10882644	10:97388579:C:T	lead	10	97388579	10:97607165:A:G	0.801774	TCTN3;CCNJ;CYP2C19;HELLS;PDLIM1;R3HCC1L	SORBS1;PDLIM1;EXOC6;TCTN3;CC2D2B	1f
45		rs10882644	10:97388579:C:T	lead	10	97388579	10:97608422:A:G	0.905683	TCTN3;CCNJ;CYP2C19;HELLS;PDLIM1;R3HCC1L	SORBS1;PDLIM1;EXOC6;TCTN3;CC2D2B	1f
45		rs10882644	10:97388579:C:T	lead	10	97388579	10:97621266:A:G	0.903327	TCTN3;CCNJ;CYP2C19;HELLS;PDLIM1;R3HCC1L	SORBS1;PDLIM1;EXOC6;TCTN3;CC2D2B	1f
45		rs10882644	10:97388579:C:T	lead	10	97388579	10:97625099:A:G	0.904397	TCTN3;CCNJ;CYP2C19;HELLS;PDLIM1;R3HCC1L	SORBS1;PDLIM1;EXOC6;TCTN3;CC2D2B	1f
45		rs10882644	10:97388579:C:T	lead	10	97388579	10:97643951:A:T	0.829203	CC2D2B;TCTN3;ALDH18A1;PDLIM1;NOC3L;SORBS1;DNTT;SLC35G1;ACSM6;ZNF518A;ZFYVE27;TBC1D12;OPALIN;ENTPD1;LGI1;LOXL4;PIPSL;CCNJ;PI4K2A;FFAR4;RRP12	SORBS1;PDLIM1;EXOC6;TCTN3;CC2D2B	1f
45		rs10882644	10:97388579:C:T	lead	10	97388579	10:97388579:C:T	1	SORBS1;PDLIM1;ACSM6;LGI1;HELLS;PIPSL;OPALIN;FFAR4;R3HCC1L;AVPI1;PYROXD2	SORBS1;PDLIM1;EXOC6;TCTN3;CC2D2B	1f
45		rs10882644	10:97388579:C:T	lead	10	97388579	10:97502597:A:G	0.907983	EXOC6;PYROXD2	SORBS1;PDLIM1;EXOC6;TCTN3;CC2D2B	3a
45		rs10882644	10:97388579:C:T	lead	10	97388579	10:97505278:C:T	0.807244	EXOC6;PYROXD2	SORBS1;PDLIM1;EXOC6;TCTN3;CC2D2B	3a
45		rs10882644	10:97388579:C:T	lead	10	97388579	10:97415455:A:G	0.962419	PDLIM1;SORBS1	SORBS1;PDLIM1;EXOC6;TCTN3;CC2D2B	4
45		rs10882644	10:97388579:C:T	lead	10	97388579	10:97552970:G:T	0.906834	HELLS;ACSM6;ENTPD1;PLCE1;TCTN3;CC2D2B;CYP2C19;FFAR4;SORBS1;CYP2C9;EXOC6;CRTAC1;ENTPD1-AS1;MIR1287;CCNJ	SORBS1;PDLIM1;EXOC6;TCTN3;CC2D2B	4
45		rs10882644	10:97388579:C:T	lead	10	97388579	10:97371327:C:G	0.979396	SORBS1;PDLIM1;ACSM6;LGI1;HELLS;PIPSL;OPALIN;FFAR4;R3HCC1L;AVPI1;PYROXD2	SORBS1;PDLIM1;EXOC6;TCTN3;CC2D2B	5
45		rs10882644	10:97388579:C:T	lead	10	97388579	10:97411206:A:G	0.972905	PDLIM1;SORBS1	SORBS1;PDLIM1;EXOC6;TCTN3;CC2D2B	5
45		rs10882644	10:97388579:C:T	lead	10	97388579	10:97417174:A:G	0.963243	PDLIM1;SORBS1	SORBS1;PDLIM1;EXOC6;TCTN3;CC2D2B	5
45		rs10882644	10:97388579:C:T	lead	10	97388579	10:97466129:D:I	0.910051	SORBS1	SORBS1;PDLIM1;EXOC6;TCTN3;CC2D2B	5
45		rs10882644	10:97388579:C:T	lead	10	97388579	10:97469118:D:I	0.8951	SORBS1	SORBS1;PDLIM1;EXOC6;TCTN3;CC2D2B	5
45		rs10882644	10:97388579:C:T	lead	10	97388579	10:97569232:C:T	0.906834	TCTN3;PDLIM1;ACSM6;CC2D2B;ENTPD1;R3HCC1L;ALDH18A1;SORBS1;ARHGAP19;SLC35G1;NOC3L;CCNJ;HELLS;PIK3AP1;FFAR4;ENTPD1-AS1	SORBS1;PDLIM1;EXOC6;TCTN3;CC2D2B	5
45		rs10882644	10:97388579:C:T	lead	10	97388579	10:97569568:C:G	0.906834	TCTN3;PDLIM1;ACSM6;CC2D2B;ENTPD1;R3HCC1L;ALDH18A1;SORBS1;ARHGAP19;SLC35G1;NOC3L;CCNJ;HELLS;PIK3AP1;FFAR4;ENTPD1-AS1	SORBS1;PDLIM1;EXOC6;TCTN3;CC2D2B	5
46	SH3PXD2A/ OBFC1	rs10883908	10:105524081:C:T	lead	10	105524081	10:105524081:C:T	1	MIR609;SH3PXD2A;GSTO1	MIR609	5
46		rs1044258	10:103605714:C:T	conditional	10	103605714	10:103605714:C:T	1	C10orf76;RPEL1;SLF2	TLX1NB;C10orf76	5
46		rs1044258	10:103605714:C:T	conditional	10	103605714	10:103555611:C:T	0.983184	TLX1NB;C10orf76;GSTO1;MGEA5;POLL;NFKB2	TLX1NB;C10orf76	5
46		rs57496702	10:105586041:C:T	conditional	10	105586041	10:105588139:A:T	1	GSTO1;SEMA4G	GSTO1	3a
46		rs57496702	10:105586041:C:T	conditional	10	105586041	10:105583166:C:T	0.94986	GSTO1;SEMA4G	GSTO1	5
46		rs57496702	10:105586041:C:T	conditional	10	105586041	10:105586041:C:T	1	GSTO1;SEMA4G	GSTO1	5
46		rs762032	10:105614754:G:T	conditional	10	105614754	10:105614754:G:T	1	GSTO1;SH3PXD2A;COL17A1	GSTO1	2b
46		rs762032	10:105614754:G:T	conditional	10	105614754	10:105603360:C:T	0.981284	GSTO1;SH3PXD2A;COL17A1	GSTO1	2b
46		rs762032	10:105614754:G:T	conditional	10	105614754	10:105609805:G:T	0.981284	GSTO1;SH3PXD2A;COL17A1	GSTO1	2b
46		rs762032	10:105614754:G:T	conditional	10	105614754	10:105670840:D:I	0.928832	GSTO1;SLK;SFR1;MIR609;MIR936;COL17A1;SH3PXD2A;ITPRIP;ARL3;NEURL1;CYP17A1;ACTR1A	GSTO1	2b
46		rs762032	10:105614754:G:T	conditional	10	105614754	10:105600591:D:I	0.981284	GSTO1;SH3PXD2A;COL17A1	GSTO1	3a
46		rs762032	10:105614754:G:T	conditional	10	105614754	10:105597122:A:C	0.981284	GSTO1;SEMA4G	GSTO1	4
46		rs762032	10:105614754:G:T	conditional	10	105614754	10:105600435:C:G	0.981284	GSTO1;SH3PXD2A;COL17A1	GSTO1	4
46		rs762032	10:105614754:G:T	conditional	10	105614754	10:105600741:A:C	0.981284	GSTO1;SH3PXD2A;COL17A1	GSTO1	4
46		rs762032	10:105614754:G:T	conditional	10	105614754	10:105602411:C:G	0.981284	GSTO1;SH3PXD2A;COL17A1	GSTO1	4
46		rs762032	10:105614754:G:T	conditional	10	105614754	10:105602465:C:T	0.981284	GSTO1;SH3PXD2A;COL17A1	GSTO1	4
46		rs762032	10:105614754:G:T	conditional	10	105614754	10:105603318:C:G	0.981284	GSTO1;SH3PXD2A;COL17A1	GSTO1	4
46		rs762032	10:105614754:G:T	conditional	10	105614754	10:105605987:C:T	0.981284	GSTO1;SH3PXD2A;COL17A1	GSTO1	4
46		rs762032	10:105614754:G:T	conditional	10	105614754	10:105607761:D:I	0.981284	GSTO1;SH3PXD2A;COL17A1	GSTO1	4
46		rs762032	10:105614754:G:T	conditional	10	105614754	10:105607966:D:I	0.981284	GSTO1;SH3PXD2A;COL17A1	GSTO1	4
46		rs762032	10:105614754:G:T	conditional	10	105614754	10:105608007:C:T	0.981284	GSTO1;SH3PXD2A;COL17A1	GSTO1	4
46		rs762032	10:105614754:G:T	conditional	10	105614754	10:105608185:A:G	0.981284	GSTO1;SH3PXD2A;COL17A1	GSTO1	4
46		rs762032	10:105614754:G:T	conditional	10	105614754	10:105608237:A:G	0.981284	GSTO1;SH3PXD2A;COL17A1	GSTO1	4
46		rs762032	10:105614754:G:T	conditional	10	105614754	10:105608480:A:C	0.981284	GSTO1;SH3PXD2A;COL17A1	GSTO1	4
46		rs762032	10:105614754:G:T	conditional	10	105614754	10:105612752:G:T	0.981284	GSTO1;SH3PXD2A;COL17A1	GSTO1	4
46		rs762032	10:105614754:G:T	conditional	10	105614754	10:105613653:C:G	0.981284	GSTO1;SH3PXD2A;COL17A1	GSTO1	4
46		rs762032	10:105614754:G:T	conditional	10	105614754	10:105613698:A:G	0.981284	GSTO1;SH3PXD2A;COL17A1	GSTO1	4
46		rs762032	10:105614754:G:T	conditional	10	105614754	10:105614544:A:T	0.981284	GSTO1;SH3PXD2A;COL17A1	GSTO1	4
46		rs762032	10:105614754:G:T	conditional	10	105614754	10:105648080:D:I	0.928832	GSTO1;SLK;SFR1;MIR609;MIR936;COL17A1;SH3PXD2A;ITPRIP;ARL3;NEURL1;CYP17A1;ACTR1A	GSTO1	4
46		rs762032	10:105614754:G:T	conditional	10	105614754	10:105591085:C:T	0.962297	GSTO1;SEMA4G	GSTO1	5
46		rs762032	10:105614754:G:T	conditional	10	105614754	10:105599531:A:G	0.981284	GSTO1;SEMA4G	GSTO1	5
46		rs762032	10:105614754:G:T	conditional	10	105614754	10:105600957:C:T	0.981284	GSTO1;SH3PXD2A;COL17A1	GSTO1	5
46		rs762032	10:105614754:G:T	conditional	10	105614754	10:105603184:A:G	0.981284	GSTO1;SH3PXD2A;COL17A1	GSTO1	5
46		rs762032	10:105614754:G:T	conditional	10	105614754	10:105606287:C:T	0.981284	GSTO1;SH3PXD2A;COL17A1	GSTO1	5
46		rs762032	10:105614754:G:T	conditional	10	105614754	10:105606651:A:G	0.962297	GSTO1;SH3PXD2A;COL17A1	GSTO1	5
46		rs762032	10:105614754:G:T	conditional	10	105614754	10:105608625:C:T	0.981284	GSTO1;SH3PXD2A;COL17A1	GSTO1	5
46		rs762032	10:105614754:G:T	conditional	10	105614754	10:105609231:C:G	0.981284	GSTO1;SH3PXD2A;COL17A1	GSTO1	5
46		rs762032	10:105614754:G:T	conditional	10	105614754	10:105609646:A:G	0.981284	GSTO1;SH3PXD2A;COL17A1	GSTO1	5
46		rs762032	10:105614754:G:T	conditional	10	105614754	10:105618160:A:G	0.981284	GSTO1;SH3PXD2A;COL17A1	GSTO1	5
46		rs762032	10:105614754:G:T	conditional	10	105614754	10:105636331:C:T	0.962297	GSTO1;SH3PXD2A;COL17A1	GSTO1	5
46		rs762032	10:105614754:G:T	conditional	10	105614754	10:105638232:C:T	0.962297	GSTO1;SH3PXD2A;COL17A1	GSTO1	5
46		rs762032	10:105614754:G:T	conditional	10	105614754	10:105661297:A:G	0.928832	GSTO1;SLK;SFR1;MIR609;MIR936;COL17A1;SH3PXD2A;ITPRIP;ARL3;NEURL1;CYP17A1;ACTR1A	GSTO1	5
46		rs762032	10:105614754:G:T	conditional	10	105614754	10:105663064:C:T	0.928832	GSTO1;SLK;SFR1;MIR609;MIR936;COL17A1;SH3PXD2A;ITPRIP;ARL3;NEURL1;CYP17A1;ACTR1A	GSTO1	5
46		rs762032	10:105614754:G:T	conditional	10	105614754	10:105671212:A:C	0.928832	GSTO1;SLK;SFR1;MIR609;MIR936;COL17A1;SH3PXD2A;ITPRIP;ARL3;NEURL1;CYP17A1;ACTR1A	GSTO1	5
46		rs10748858	10:105639514:G:T	conditional	10	105639514	10:105639514:G:T	1	GSTO1;SH3PXD2A;COL17A1	GSTO1	5
46		rs188491623	10:105871872:A:G	conditional	10	105871872	10:105882290:C:G	1	STN1;SLK;MIR609;MIR936;GSTO1;COL17A1;SH3PXD2A;ITPRIP	STN1	4
47	NAV2	rs2625322	11:20010351:A:G	lead	11	20010351	11:20010351:A:G	1	NAV2;E2F8;LOC100126784;CSRP3;PRMT3;MIR4486;DBX1;LDHA;SVIP;ZDHHC13;USH1C;NUCB2;NCR3LG1;MRGPRX2;NAV2-AS5;SLC17A6;LDHAL6A;KCNJ11;TSG101	NAV2	4
49	WNT11	rs94111	11:75915139:A:G	lead	11	75915139	11:75916507:C:T	0.942711	UVRAG;MAP6	UVRAG	4
49		rs94111	11:75915139:A:G	lead	11	75915139	11:75916477:A:G	0.860237	UVRAG;MAP6	UVRAG	4
49		rs94111	11:75915139:A:G	lead	11	75915139	11:75909619:A:G	0.815129	UVRAG;MAP6	UVRAG	5
49		rs94111	11:75915139:A:G	lead	11	75915139	11:75915139:A:G	1	UVRAG;MAP6	UVRAG	5
50	SOX5/ C12orf67/ LINC00477/ BCAT1	rs4246224	12:24784139:A:G	lead	12	24784139	12:24758480:A:G	0.977431	SOX5;MIR920;BCAT1	SOX5;MIR920	5
50		rs4246224	12:24784139:A:G	lead	12	24784139	12:24770878:A:G	0.957543	MIR920;SOX5;LINC00477;ITPR2;LMNTD1;MIR4302;BHLHE41;C12orf71;STK38L	SOX5;MIR920	5
50		rs4246224	12:24784139:A:G	lead	12	24784139	12:24779491:G:T	0.837324	MIR920;SOX5;LINC00477;ITPR2;LMNTD1;MIR4302;BHLHE41;C12orf71;STK38L	SOX5;MIR920	5
51	TBX5-TBX3	rs1124477	12:115349497:C:T	lead	12	115349497	12:115354179:C:T	0.836914	HRK;C12orf49;TBX3;MIR620;MED13L;RPH3A;MAP1LC3B2;NOS1;MIR4472-2	HRK	2b
51		rs1124477	12:115349497:C:T	lead	12	115349497	12:115353801:C:T	0.836612	HRK;C12orf49;TBX3;MIR620;MED13L;RPH3A;MAP1LC3B2;NOS1;MIR4472-2	HRK	3a
51		rs1124477	12:115349497:C:T	lead	12	115349497	12:115351909:A:C	0.99428	HRK;C12orf49;TBX3;MIR620;MED13L;RPH3A;MAP1LC3B2;NOS1;MIR4472-2	HRK	4
51		rs1124477	12:115349497:C:T	lead	12	115349497	12:115353703:A:G	0.935863	HRK;C12orf49;TBX3;MIR620;MED13L;RPH3A;MAP1LC3B2;NOS1;MIR4472-2	HRK	4
51		rs1124477	12:115349497:C:T	lead	12	115349497	12:115354228:D:I	0.837842	HRK;C12orf49;TBX3;MIR620;MED13L;RPH3A;MAP1LC3B2;NOS1;MIR4472-2	HRK	4
51		rs1124477	12:115349497:C:T	lead	12	115349497	12:115357003:A:G	0.938227	HRK;C12orf49;TBX3;MIR620;MED13L;RPH3A;MAP1LC3B2;NOS1;MIR4472-2	HRK	4
51		rs1124477	12:115349497:C:T	lead	12	115349497	12:115358952:G:T	0.93288	HRK;C12orf49;TBX3;MIR620;MED13L;RPH3A;MAP1LC3B2;NOS1;MIR4472-2	HRK	4
51		rs1124477	12:115349497:C:T	lead	12	115349497	12:115371181:C:T	0.879132	C12orf49;TBX3;MAP1LC3B2;MED13L	HRK	4
51		rs1124477	12:115349497:C:T	lead	12	115349497	12:115349497:C:T	1	HRK;C12orf49;TBX3;MIR620;MED13L;RPH3A;MAP1LC3B2;NOS1;MIR4472-2	HRK	4
51		rs1124477	12:115349497:C:T	lead	12	115349497	12:115346917:D:I	0.992676	HRK;C12orf49;TBX3;MIR620;MED13L;RPH3A;MAP1LC3B2;NOS1;MIR4472-2	HRK	5
51		rs1124477	12:115349497:C:T	lead	12	115349497	12:115351794:G:T	0.993463	HRK;C12orf49;TBX3;MIR620;MED13L;RPH3A;MAP1LC3B2;NOS1;MIR4472-2	HRK	5
51		rs1124477	12:115349497:C:T	lead	12	115349497	12:115361364:G:T	0.885756	C12orf49;TBX3;MAP1LC3B2;MED13L	HRK	5
51		rs1124477	12:115349497:C:T	lead	12	115349497	12:115381147:C:T	0.82634	C12orf49;TBX3;MAP1LC3B2;MED13L	HRK	5
51		rs883079	12:114793240:C:T	conditional	12	114793240	12:114793240:C:T	1	TBX5;NOS1;FBXW8	TBX5;NOS1	5
51		rs883079	12:114793240:C:T	conditional	12	114793240	12:114790500:A:G	0.810081	TBX5;NOS1;FBXW8	TBX5;NOS1	5
51		rs883079	12:114793240:C:T	conditional	12	114793240	12:114799974:A:G	0.936055	TBX5;NOS1;FBXW8	TBX5;NOS1	5
51		rs883079	12:114793240:C:T	conditional	12	114793240	12:114800813:A:G	0.892539	NOS1;TBX5;MIR620;FBXO21	TBX5;NOS1	5
51		rs883079	12:114793240:C:T	conditional	12	114793240	12:114801772:A:G	0.917509	NOS1;TBX5;MIR620;FBXO21	TBX5;NOS1	5
51		rs883079	12:114793240:C:T	conditional	12	114793240	12:114807035:A:G	0.818976	NOS1;TBX5;MIR620;FBXO21	TBX5;NOS1	5
51		rs11067104	12:114854089:C:G	conditional	12	114854089	12:114854089:C:G	1	TBX5;MIR4472-2;MAP1LC3B2;MED13L	TBX5	5
51		rs6489973	12:115156523:A:G	conditional	12	115156523	12:115155876:C:G	0.979618	MIR4472-2;MED13L;TESC	MIR4472-2	5
51		rs5029664	12:115350053:A:C	conditional	12	115350053	12:115345396:C:G	0.90598	HRK;C12orf49;TBX3;MIR620;MED13L;RPH3A;MAP1LC3B2;NOS1;MIR4472-2	HRK	5
51		rs35479	12:115529349:C:T	conditional	12	115529349	12:115523489:A:G	0.860651	MAP1LC3B2	MAP1LC3B2	4
51		rs35479	12:115529349:C:T	conditional	12	115529349	12:115529349:C:T	1	MAP1LC3B2	MAP1LC3B2	5
51		rs140828160	12:116229226:D:I	conditional	12	116229226	12:116229226:D:I	1	TBX3;HRK;TBX5;FBXW8	TBX3	3a
51		rs140828160	12:116229226:D:I	conditional	12	116229226	12:116228495:C:T	0.915628	TBX3;HRK;TBX5;FBXW8	TBX3	5
51		rs1974741	12:116234273:C:T	conditional	12	116234273	12:116233010:C:T	1	TBX3;HRK;TBX5;FBXW8	TBX3	2b
51		rs1974741	12:116234273:C:T	conditional	12	116234273	12:116232754:D:I	1	TBX3;HRK;TBX5;FBXW8	TBX3	4
51		rs1974741	12:116234273:C:T	conditional	12	116234273	12:116232887:A:G	1	TBX3;HRK;TBX5;FBXW8	TBX3	4
51		rs1974741	12:116234273:C:T	conditional	12	116234273	12:116236369:C:T	1	TBX3;HRK;TBX5;FBXW8	TBX3	4
51		rs1974741	12:116234273:C:T	conditional	12	116234273	12:116233845:G:T	1	TBX3;HRK;TBX5;FBXW8	TBX3	5
51		rs1974741	12:116234273:C:T	conditional	12	116234273	12:116235182:A:G	1	TBX3;HRK;TBX5;FBXW8	TBX3	5
51		rs1974741	12:116234273:C:T	conditional	12	116234273	12:116236784:C:T	1	TBX3;HRK;TBX5;FBXW8	TBX3	5
51		rs1974741	12:116234273:C:T	conditional	12	116234273	12:116236995:G:T	1	TBX3;HRK;TBX5;FBXW8	TBX3	5
51		rs1974741	12:116234273:C:T	conditional	12	116234273	12:116237944:A:G	1	TBX3;HRK;TBX5;FBXW8	TBX3	5
51		rs1974741	12:116234273:C:T	conditional	12	116234273	12:116239834:C:T	1	TBX3;HRK;TBX5;FBXW8	TBX3	5
51		rs1974741	12:116234273:C:T	conditional	12	116234273	12:116234273:C:T	1	TBX3;HRK;TBX5;FBXW8	TBX3	5
51		rs2384681	12:116283943:C:T	conditional	12	116283943	12:116276273:A:G	0.903361	TBX3;FBXW8;TAOK3;TBX5;IQCD	TBX3	2b
51		rs2384681	12:116283943:C:T	conditional	12	116283943	12:116283380:A:G	0.995247	TBX3;RBM19;TBX5;KSR2	TBX3	4
51		rs2384681	12:116283943:C:T	conditional	12	116283943	12:116275949:A:G	0.903766	TBX3;FBXW8;TAOK3;TBX5;IQCD	TBX3	5
52	XPO4/ EFHA1	rs12869776	13:22103294:A:G	lead	13	22103294	13:22115822:A:G	0.911434	SAP18;IL17D;SACS;CRYL1;ZMYM5;TNFRSF19	SAP18	3a
52		rs12869776	13:22103294:A:G	lead	13	22103294	13:22111521:A:C	0.901818	SAP18;IL17D;SACS;CRYL1;ZMYM5;TNFRSF19	SAP18	4
52		rs12869776	13:22103294:A:G	lead	13	22103294	13:22120666:C:T	0.882315	IFT88	SAP18	4
52		rs12869776	13:22103294:A:G	lead	13	22103294	13:22061041:C:T	0.931468	SAP18;PSPC1	SAP18	5
52		rs12869776	13:22103294:A:G	lead	13	22103294	13:22085965:C:T	0.920319	SAP18;IL17D;SACS;CRYL1;ZMYM5;TNFRSF19	SAP18	5
52		rs12869776	13:22103294:A:G	lead	13	22103294	13:22092762:G:T	0.966047	SAP18;IL17D;SACS;CRYL1;ZMYM5;TNFRSF19	SAP18	5
52		rs12869776	13:22103294:A:G	lead	13	22103294	13:22092961:C:T	0.940567	SAP18;IL17D;SACS;CRYL1;ZMYM5;TNFRSF19	SAP18	5
52		rs12869776	13:22103294:A:G	lead	13	22103294	13:22096611:G:T	0.967838	SAP18;IL17D;SACS;CRYL1;ZMYM5;TNFRSF19	SAP18	5
52		rs12869776	13:22103294:A:G	lead	13	22103294	13:22097453:A:G	0.985078	SAP18;IL17D;SACS;CRYL1;ZMYM5;TNFRSF19	SAP18	5
52		rs12869776	13:22103294:A:G	lead	13	22103294	13:22097630:C:T	0.965267	SAP18;IL17D;SACS;CRYL1;ZMYM5;TNFRSF19	SAP18	5
52		rs12869776	13:22103294:A:G	lead	13	22103294	13:22102976:A:G	0.992972	SAP18;IL17D;SACS;CRYL1;ZMYM5;TNFRSF19	SAP18	5
52		rs12869776	13:22103294:A:G	lead	13	22103294	13:22105506:A:T	0.908256	SAP18;IL17D;SACS;CRYL1;ZMYM5;TNFRSF19	SAP18	5
52		rs12869776	13:22103294:A:G	lead	13	22103294	13:22116804:C:T	0.804126	SAP18;IL17D;SACS;CRYL1;ZMYM5;TNFRSF19	SAP18	5
52		rs12869776	13:22103294:A:G	lead	13	22103294	13:22141526:A:T	0.849945	IFT88	SAP18	5
52		rs12869776	13:22103294:A:G	lead	13	22103294	13:22171158:A:G	0.80373	SACS;ZMYM2;IL17D	SAP18	5
52		rs12869776	13:22103294:A:G	lead	13	22103294	13:22103294:A:G	1	SAP18;IL17D;SACS;CRYL1;ZMYM5;TNFRSF19	SAP18	5
52		rs2013546	13:21386229:A:G	conditional	13	21386229	13:21343209:C:T	0.806344	SACS;SAP18	MICU2;SACS;IL17D	2b
52		rs2013546	13:21386229:A:G	conditional	13	21386229	13:21417636:A:C	0.88272	IL17D;IFT88;MICU2;MRPL57;SACS	MICU2;SACS;IL17D	2b
52		rs2013546	13:21386229:A:G	conditional	13	21386229	13:21304911:C:T	0.913589	MICU2	MICU2;SACS;IL17D	2c
52		rs2013546	13:21386229:A:G	conditional	13	21386229	13:21347384:A:G	0.986117	SACS;SAP18	MICU2;SACS;IL17D	3a
52		rs2013546	13:21386229:A:G	conditional	13	21386229	13:21438871:A:G	0.865935	IL17D;IFT88;MICU2;MRPL57;SACS	MICU2;SACS;IL17D	3a
52		rs2013546	13:21386229:A:G	conditional	13	21386229	13:21418410:A:G	0.88272	IL17D;IFT88;MICU2;MRPL57;SACS	MICU2;SACS;IL17D	3b
52		rs2013546	13:21386229:A:G	conditional	13	21386229	13:21388724:C:T	0.88272	SAP18;GJB2;IL17D;CRYL1;IFT88;MICU2	MICU2;SACS;IL17D	4
52		rs2013546	13:21386229:A:G	conditional	13	21386229	13:21418094:G:T	0.88272	IL17D;IFT88;MICU2;MRPL57;SACS	MICU2;SACS;IL17D	4
52		rs2013546	13:21386229:A:G	conditional	13	21386229	13:21466641:A:C	0.993053	-	MICU2;SACS;IL17D	4
52		rs2013546	13:21386229:A:G	conditional	13	21386229	13:21300909:C:T	0.913589	MICU2	MICU2;SACS;IL17D	5
52		rs2013546	13:21386229:A:G	conditional	13	21386229	13:21302058:A:G	0.913589	MICU2	MICU2;SACS;IL17D	5
52		rs2013546	13:21386229:A:G	conditional	13	21386229	13:21302347:C:T	0.907358	MICU2	MICU2;SACS;IL17D	5
52		rs2013546	13:21386229:A:G	conditional	13	21386229	13:21311695:A:G	0.851079	MICU2	MICU2;SACS;IL17D	5
52		rs2013546	13:21386229:A:G	conditional	13	21386229	13:21313282:A:G	0.972325	MICU2	MICU2;SACS;IL17D	5
52		rs2013546	13:21386229:A:G	conditional	13	21386229	13:21313373:A:G	0.972325	MICU2	MICU2;SACS;IL17D	5
52		rs2013546	13:21386229:A:G	conditional	13	21386229	13:21314209:G:T	0.965448	MICU2	MICU2;SACS;IL17D	5
52		rs2013546	13:21386229:A:G	conditional	13	21386229	13:21342151:A:G	0.869083	SACS;SAP18	MICU2;SACS;IL17D	5
52		rs2013546	13:21386229:A:G	conditional	13	21386229	13:21349667:A:G	0.877075	SACS;SAP18	MICU2;SACS;IL17D	5
52		rs2013546	13:21386229:A:G	conditional	13	21386229	13:21365721:C:T	0.88272	SAP18;GJB2;IL17D;CRYL1;IFT88;MICU2	MICU2;SACS;IL17D	5
52		rs2013546	13:21386229:A:G	conditional	13	21386229	13:21368822:A:G	1	SAP18;GJB2;IL17D;CRYL1;IFT88;MICU2	MICU2;SACS;IL17D	5
52		rs2013546	13:21386229:A:G	conditional	13	21386229	13:21369315:C:T	0.824998	SAP18;GJB2;IL17D;CRYL1;IFT88;MICU2	MICU2;SACS;IL17D	5
52		rs2013546	13:21386229:A:G	conditional	13	21386229	13:21369911:C:T	0.88272	SAP18;GJB2;IL17D;CRYL1;IFT88;MICU2	MICU2;SACS;IL17D	5
52		rs2013546	13:21386229:A:G	conditional	13	21386229	13:21369982:C:T	1	SAP18;GJB2;IL17D;CRYL1;IFT88;MICU2	MICU2;SACS;IL17D	5
52		rs2013546	13:21386229:A:G	conditional	13	21386229	13:21371427:C:T	0.819909	SAP18;GJB2;IL17D;CRYL1;IFT88;MICU2	MICU2;SACS;IL17D	5
52		rs2013546	13:21386229:A:G	conditional	13	21386229	13:21373908:A:C	0.88272	SAP18;GJB2;IL17D;CRYL1;IFT88;MICU2	MICU2;SACS;IL17D	5
52		rs2013546	13:21386229:A:G	conditional	13	21386229	13:21392521:C:G	1	SAP18;GJB2;IL17D;CRYL1;IFT88;MICU2	MICU2;SACS;IL17D	5
52		rs2013546	13:21386229:A:G	conditional	13	21386229	13:21398861:A:G	0.877075	SAP18;GJB2;IL17D;CRYL1;IFT88;MICU2	MICU2;SACS;IL17D	5
52		rs2013546	13:21386229:A:G	conditional	13	21386229	13:21398979:A:G	1	SAP18;GJB2;IL17D;CRYL1;IFT88;MICU2	MICU2;SACS;IL17D	5
52		rs2013546	13:21386229:A:G	conditional	13	21386229	13:21400301:C:T	0.877075	IL17D;IFT88;MICU2;MRPL57;SACS	MICU2;SACS;IL17D	5
52		rs2013546	13:21386229:A:G	conditional	13	21386229	13:21415503:D:I	0.88272	IL17D;IFT88;MICU2;MRPL57;SACS	MICU2;SACS;IL17D	5
52		rs2013546	13:21386229:A:G	conditional	13	21386229	13:21422910:A:T	1	IL17D;IFT88;MICU2;MRPL57;SACS	MICU2;SACS;IL17D	5
52		rs2013546	13:21386229:A:G	conditional	13	21386229	13:21422911:A:C	1	IL17D;IFT88;MICU2;MRPL57;SACS	MICU2;SACS;IL17D	5
52		rs2013546	13:21386229:A:G	conditional	13	21386229	13:21423525:C:G	1	IL17D;IFT88;MICU2;MRPL57;SACS	MICU2;SACS;IL17D	5
52		rs2013546	13:21386229:A:G	conditional	13	21386229	13:21445435:A:G	0.865935	-	MICU2;SACS;IL17D	5
52		rs2013546	13:21386229:A:G	conditional	13	21386229	13:21447278:C:T	1	-	MICU2;SACS;IL17D	5
52		rs2013546	13:21386229:A:G	conditional	13	21386229	13:21449692:C:G	1	-	MICU2;SACS;IL17D	5
52		rs2013546	13:21386229:A:G	conditional	13	21386229	13:21466175:D:I	0.883905	-	MICU2;SACS;IL17D	5
52		rs11147883	13:21444538:A:T	conditional	13	21444538	13:21361513:C:T	0.870188	SAP18;GJB2;IL17D;CRYL1;IFT88;MICU2	SAP18	5
52		rs11147883	13:21444538:A:T	conditional	13	21444538	13:21452308:C:T	0.953955	-	SAP18	5
52		rs11147883	13:21444538:A:T	conditional	13	21444538	13:21452650:C:G	1	-	SAP18	5
52		rs11147883	13:21444538:A:T	conditional	13	21444538	13:21478391:C:T	0.849982	-	SAP18	5
53	LRCH1	rs4245338	13:47244162:A:G	lead	13	47244162	13:47240876:A:G	0.958787	LRCH1;ITM2B	LRCH1	2b
53		rs4245338	13:47244162:A:G	lead	13	47244162	13:47241022:A:T	0.959623	LRCH1;ITM2B	LRCH1	2b
53		rs4245338	13:47244162:A:G	lead	13	47244162	13:47242088:C:T	0.95727	LRCH1;ITM2B	LRCH1	2b
53		rs4245338	13:47244162:A:G	lead	13	47244162	13:47242761:A:G	0.969157	LRCH1;ITM2B	LRCH1	2c
53		rs4245338	13:47244162:A:G	lead	13	47244162	13:47241223:C:T	0.96199	LRCH1;ITM2B	LRCH1	3a
53		rs4245338	13:47244162:A:G	lead	13	47244162	13:47241289:C:T	0.96199	LRCH1;ITM2B	LRCH1	3a
53		rs4245338	13:47244162:A:G	lead	13	47244162	13:47242857:D:I	0.819981	LRCH1;ITM2B	LRCH1	3a
53		rs4245338	13:47244162:A:G	lead	13	47244162	13:47243433:A:G	0.996737	LRCH1;ITM2B	LRCH1	3a
53		rs4245338	13:47244162:A:G	lead	13	47244162	13:47243476:C:G	0.995919	LRCH1;ITM2B	LRCH1	3a
53		rs4245338	13:47244162:A:G	lead	13	47244162	13:47237952:A:G	0.952337	LRCH1;LINC00284;ESD;RCBTB1;CCDC122;LINC00462;CDADC1;ITM2B;TSC22D1;SUCLA2;SETDB2;RB1;CYSLTR2	LRCH1	4
53		rs4245338	13:47244162:A:G	lead	13	47244162	13:47239853:A:G	0.958008	LRCH1;LINC00284;ESD;RCBTB1;CCDC122;LINC00462;CDADC1;ITM2B;TSC22D1;SUCLA2;SETDB2;RB1;CYSLTR2	LRCH1	4
53		rs4245338	13:47244162:A:G	lead	13	47244162	13:47241532:C:T	0.961184	LRCH1;ITM2B	LRCH1	4
53		rs4245338	13:47244162:A:G	lead	13	47244162	13:47242065:C:T	0.96273	LRCH1;ITM2B	LRCH1	4
53		rs4245338	13:47244162:A:G	lead	13	47244162	13:47242104:C:G	0.945174	LRCH1;ITM2B	LRCH1	4
53		rs4245338	13:47244162:A:G	lead	13	47244162	13:47242912:G:T	0.968325	LRCH1;ITM2B	LRCH1	4
53		rs4245338	13:47244162:A:G	lead	13	47244162	13:47242927:C:G	0.968325	LRCH1;ITM2B	LRCH1	4
53		rs4245338	13:47244162:A:G	lead	13	47244162	13:47238950:A:T	0.958008	LRCH1;LINC00284;ESD;RCBTB1;CCDC122;LINC00462;CDADC1;ITM2B;TSC22D1;SUCLA2;SETDB2;RB1;CYSLTR2	LRCH1	5
53		rs4245338	13:47244162:A:G	lead	13	47244162	13:47242969:D:I	0.893532	LRCH1;ITM2B	LRCH1	5
53		rs4245338	13:47244162:A:G	lead	13	47244162	13:47244223:G:T	0.998358	LRCH1;ITM2B	LRCH1	5
53		rs4245338	13:47244162:A:G	lead	13	47244162	13:47245318:C:T	0.960182	LRCH1;ITM2B	LRCH1	5
53		rs4245338	13:47244162:A:G	lead	13	47244162	13:47244162:A:G	1	LRCH1;ITM2B	LRCH1	5
54	CAB39L	rs35214871	13:49918175:G:T	lead	13	49918175	13:49918175:G:T	1	CAB39L;RCBTB1;DHRS12;INTS6;DLEU7;NEK5	CAB39L	5
55	ADPRHL1	rs41306688	13:114078558:A:C	lead	13	114078558	13:114078558:A:C	1	DCUN1D2;CUL4A;PROZ;CDC16;PCID2;RASA3	DCUN1D2	5
56	IL25/ MYH6	rs2754171	14:23904988:C:T	lead	14	23904988	14:23904988:C:T	1	IL25;LINC00641;SLC22A17;HOMEZ	IL25	3a
56		rs28711516	14:23876267:C:T	conditional	14	23876267	14:23876267:C:T	1	MIR208B	MIR208B	5
56		rs28711516	14:23876267:C:T	conditional	14	23876267	14:23874541:C:T	1	MIR208B	MIR208B	5
56		rs11621360	14:23911407:C:T	conditional	14	23911407	14:23907608:C:G	0.913476	IL25;LINC00641;SLC22A17;HOMEZ	IL25	4
57	FERMT2	rs62003514	14:53321273:C:T	lead	14	53321273	14:53330007:C:T	0.875213	DDHD1;CNIH1;FRMD6-AS1;GMFB;ERO1A;NIN	DDHD1	2b
58	SNORD56B	rs61989382	14:71983638:C:T	lead	14	71983638	14:71847117:A:G	0.842774	SIPA1L1;RGS6;SLC8A3;DPF3;ZNF410	SIPA1L1	2a
58		rs61989382	14:71983638:C:T	lead	14	71983638	14:71788946:C:T	0.848079	SIPA1L1;RGS6;ZFYVE1;SRSF5	SIPA1L1	2b
58		rs61989382	14:71983638:C:T	lead	14	71983638	14:71789862:C:T	0.85722	SIPA1L1;RGS6;ZFYVE1;SRSF5	SIPA1L1	2b
58		rs61989382	14:71983638:C:T	lead	14	71983638	14:71757251:A:T	0.851462	SIPA1L1;RGS6;ZFYVE1;SNORD56B;NUMB;DPF3	SIPA1L1	4
58		rs61989382	14:71983638:C:T	lead	14	71983638	14:71990847:D:I	0.985281	SIPA1L1;RGS6;ADAM20;SNORD56B;PCNX1;DPF3;ADAM20P1;ZNF410;COQ6;PAPLN;ELMSAN1;ZFYVE1;SMOC1	SIPA1L1	4
58		rs61989382	14:71983638:C:T	lead	14	71983638	14:71785276:A:G	0.855778	SIPA1L1;RGS6;ZFYVE1;SRSF5	SIPA1L1	5
58		rs61989382	14:71983638:C:T	lead	14	71983638	14:71849740:A:G	0.871456	SIPA1L1;RGS6;SLC8A3;DPF3;ZNF410	SIPA1L1	5
58		rs61989382	14:71983638:C:T	lead	14	71983638	14:71956141:A:C	0.979543	SIPA1L1;RGS6;PCNX1;SNORD56B;DPF3;SLC8A3;ZFYVE1;SLC10A1;ERH;SYNJ2BP-COX16;NUMB;MAP3K9	SIPA1L1	5
58		rs61989382	14:71983638:C:T	lead	14	71983638	14:71956270:C:T	0.981013	SIPA1L1;RGS6;PCNX1;SNORD56B;DPF3;SLC8A3;ZFYVE1;SLC10A1;ERH;SYNJ2BP-COX16;NUMB;MAP3K9	SIPA1L1	5
59	TLE3	rs2004851	15:70446998:A:C	lead	15	70446998	15:70446998:A:C	1	DRAIC;ARIH1;MAP2K5;ITGA11;FEM1B;THSD4;MIR629;NOX5;PAQR5	DRAIC	4
59		rs2004851	15:70446998:A:C	lead	15	70446998	15:70447979:A:G	0.896474	DRAIC;ARIH1;MAP2K5;ITGA11;FEM1B;THSD4;MIR629;NOX5;PAQR5	DRAIC	5
60	CDH13	rs12443745	16:82754425:C:G	lead	16	82754425	16:82754425:C:G	1	CDH13;MBTPS1	CDH13	5
61	LINC00670/ MYOCD	rs35712872	17:12635871:A:G	lead	17	12635871	17:12635871:A:G	1	MYOCD;LINC00670;ARHGAP44;USP43;MGC12916;ZNF18;SHISA6;GAS7;CDRT15P1;DNAH9	MYOCD	5
61		rs11653182	17:12495199:A:G	conditional	17	12495199	17:12502672:A:G	0.803853	MYOCD;LINC00670;ELAC2;ARHGAP44;TEKT3;MYH13;MGC12916;USP43;DHRS7C;MAP2K4;COX10-AS1;MYH8;GAS7	MYOCD	2b
61		rs11653182	17:12495199:A:G	conditional	17	12495199	17:12488114:A:C	0.833731	MYOCD;LINC00670;ELAC2;ARHGAP44;TEKT3;MYH13;MGC12916;USP43;DHRS7C;MAP2K4;COX10-AS1;MYH8;GAS7	MYOCD	5
62	TOP1	rs2179452	20:40066117:A:T	lead	20	40066117	20:40247320:C:T	0.807795	CHD6;PTPRT;PLCG1;SGK2;L3MBTL1;MAFB	CHD6	2b
62		rs2179452	20:40066117:A:T	lead	20	40066117	20:40072545:C:T	0.878148	CHD6;PLCG1;ZHX3;TOP1;SRSF6;MAFB;DHX35	CHD6	4
62		rs2179452	20:40066117:A:T	lead	20	40066117	20:40166513:D:I	0.842547	CHD6;LINC01734;TOP1;L3MBTL1;PLCG1;TOX2;PTPRT;SGK2;DHX35;MAFB;ZHX3	CHD6	5
62		rs2179452	20:40066117:A:T	lead	20	40066117	20:40168384:A:G	0.837305	CHD6;LINC01734;TOP1;L3MBTL1;PLCG1;TOX2;PTPRT;SGK2;DHX35;MAFB;ZHX3	CHD6	5
62		rs2179452	20:40066117:A:T	lead	20	40066117	20:40181092:C:T	0.841286	CHD6;LINC01734;TOP1;L3MBTL1;PLCG1;TOX2;PTPRT;SGK2;DHX35;MAFB;ZHX3	CHD6	5
62		rs2179452	20:40066117:A:T	lead	20	40066117	20:40206910:C:T	0.864816	CHD6;PLCG1;TOP1;MAFB;DHX35;ZHX3;PTPRT;SGK2;SERINC3	CHD6	5
64	NCRNA00113	rs956645	21:28870626:C:T	lead	21	28870626	21:28870626:C:T	1	MIR4759;ADAMTS1;LINC00161;N6AMT1;CCT8;LINC00113;JAM2;MIR155HG;GRIK1-AS1	MIR4759	5
