# Supplementary material for: Multi-ancestry GWAS of the electrocardiographic PR interval identifies 202 loci underlying cardiac conduction
Source: Nat Commun. 2020 May 21;11:2542. doi: 10.1038/s41467-020-15706-x (PMC7242331; doi:10.1038/s41467-020-15706-x)
Supplement: Supplementary file 20 — Supplementary Data 17 [file 41467_2020_15706_MOESM20_ESM.xlsx]

## Sheet: SD17 PhenoScanner GWAS traits
Supplementary Data 17 Previously not reported PR interval loci associations with other traits from PhenoScanner.
Previously not reported loci where the lead or conditionally independent variants or proxies (r2>0.8) are associated with other traits at genome-wide significance level (P < 5x10-8) from the PhenoScanner v2 database. Locus named according to the nearest annotated gene(s). Reference rsID: rsID of the reference variant, lead or conditionally independent; Reference chromosome, chromosome of the refe…
* These loci reached genome-wide significance in the European ancestry meta-analysis and were borderline genome-wide significant in the multi-ancestry meta-analysis (P<5.4×10-7).
LocusID	Nearest gene	Reference rsID	Reference chromosome	Reference position	rsID	Position	R2	Trait	Category	Beta	SE	P	N	N cases	N controls	Unit	Ancestry	Year	PMID
5	SSBP3	rs603901	1	54741767	rs562408	54742618	0.98414	P wave duration	ECG traits	-0.52	0.08767	3e-09	-	-	-	m_SD_increase	Mixed	2017	28794112
6	NFIA	rs6587924	1	61895257	rs2207791	61894902	0.87178	QRS duration	ECG traits	-0.6	0.06115	1e-22	-	-	-	millisecond_increase	Mixed	2016	27577874
6	NFIA	rs6587924	1	61895257	rs2207790	61897967	0.87962	QRS interval	ECG traits	-	-	6.31e-18	5272	-	-	-	European	2013	23463857
6	NFIA	rs6587924	1	61895257	rs2207790	61897967	0.87962	Electrocardiographic conduction measures	ECG traits	0.5956	0.06899	6e-18	-	-	-	msec_decrease	European	2013	23463857
6	NFIA	rs6587924	1	61895257	rs2207790	61897967	0.87962	QRS duration	ECG traits	-	-	7e-19	-	-	-	unit_decrease	Mixed	2016	27659466
9	DPT	rs531706	1	168692137	rs545833	168689940	0.99505	QT interval	ECG traits	-0.9	0.107	4e-17	-	-	-	unit_increase	European	2014	24952745
13	ADCK3	rs3768419	1	227173477	rs17592479	227173892	0.97642	Granulocyte count	Blood traits	0.02538	0.00356	1e-12	-	-	-	unit_decrease	European	2016	27863252
13	ADCK3	rs3768419	1	227173477	rs17592479	227173892	0.97642	Granulocyte percentage of myeloid white cells	Blood traits	0.02466	0.003555	4e-12	-	-	-	unit_decrease	European	2016	27863252
13	ADCK3	rs3768419	1	227173477	rs17592479	227173892	0.97642	Neutrophil count	Blood traits	0.02601	0.003566	3e-13	-	-	-	unit_decrease	European	2016	27863252
13	ADCK3	rs3768419	1	227173477	rs17592479	227173892	0.97642	Sum basophil neutrophil counts	Blood traits	0.02589	0.003569	4e-13	-	-	-	unit_decrease	European	2016	27863252
13	ADCK3	rs3768419	1	227173477	rs17592479	227173892	0.97642	Sum neutrophil eosinophil counts	Blood traits	0.02565	0.003572	7e-13	-	-	-	unit_decrease	European	2016	27863252
13	ADCK3	rs3768419	1	227173477	rs6426558	227175367	0.98422	Neutrophil percentage of white cells	Blood traits	0.02705	0.00356	3e-14	-	-	-	unit_decrease	European	2016	27863252
17	LINC01249	rs12616546	2	4824622	rs10689754	4827314	0.93007	Clear cell ovarian cancer	Cancer	-	-	-	42307	1366	40941	log OR	European	2017	28346442
17	LINC01249	rs12616546	2	4824622	rs10689754	4827314	0.93007	Epithelial ovarian cancer	Cancer	-	-	-	43705	2764	40941	log OR	European	2017	28346442
17	LINC01249	rs12616546	2	4824622	rs10689754	4827314	0.93007	Low grade serous ovarian cancer	Cancer	-	-	-	41953	1012	40941	log OR	European	2017	28346442
18	STRN	rs17496249	2	37102249	rs711244	37068428	0.8839	Mean platelet volume	Blood traits	-0.03503	0.003649	8e-22	-	-	-	unit_decrease	European	2016	27863252
20	EPAS1	rs11894252	2	46533376	rs11894252	46533376	1	Renal cell carcinoma renal cancer	Cancer	-	-	9.11e-09	12277	-	-	-	European	2010	21131975
20	EPAS1	rs11894252	2	46533376	rs11894252	46533376	1	P wave duration	ECG traits	-0.52	0.08511	1e-09	-	-	-	ms_increase	Mixed	2017	28794112
20	EPAS1	rs11894252	2	46533376	rs11894252	46533376	1	Renal cell carcinoma	Cancer	-	-	3e-15	-	-	-	log_OR	European	2017	28598434
20	EPAS1	rs11894252	2	46533376	rs7579899	46537604	0.9958	Carcinoma renal cell	Cancer	-	-	2e-09	-	-	-	-	European	2010	21131975
23	LINC01812_C1D	rs7584373	2	68079211	rs6546334	68078849	0.98684	Male pattern baldness	Baldness	-	-	6e-12	-	-	-	-	European	2016	27182965
35	LAMB2	rs9865051	3	49166069	rs9834003	49216472	0.80481	Age at menarche	Menarche	0.045	0.005481	2.2e-16	182416	0	182416	years	European	2014	25231870
35	LAMB2	rs9865051	3	49166069	rs13091206	49238718	0.93455	Mean corpuscular hemoglobin	Blood traits	-0.02916	0.004264	8e-12	-	-	-	unit_decrease	European	2016	27863252
35	LAMB2	rs9865051	3	49166069	rs13091206	49238718	0.93455	Mean corpuscular volume	Blood traits	-0.02874	0.004223	1e-11	-	-	-	unit_decrease	European	2016	27863252
35	LAMB2	rs9865051	3	49166069	rs7647973	49510931	0.81261	Menarche age at onset	Menarche	0.05	0.006021	1e-16	-	-	-	unit_increase	European	2014	25231870
40	FNDC3B	rs4894803	3	171800256	rs9647379	171785168	0.97137	Heart rate	Heart rate	-	-	1.17e-09	92355	-	-	-	Mixed	2013	23583979
45	FGF5	rs36034102	4	81202048	rs36034102	81202048	1	Coronary artery disease	Coronary artery disease/ Coronary heart disease	-0.0425	0.0065	4.876e-11	547261	122733	424528	log OR	Mixed	2018	29212778
46	PDLIM5	rs2172448	4	95506214	rs12500426	95514609	0.95328	Prostatic neoplasms	Cancer	-	-	1e-11	-	-	-	-	Mixed	2009	19767753
46	PDLIM5	rs2172448	4	95506214	rs12500426	95514609	0.95328	Prostate cancer	Cancer	-	-	2.6e-12	3748	-	-	-	Mixed	2009	19767753
49	SUB1	rs1173743*	5	32775047	rs1173743	32775047	1	Height	Height	0.021	0.003	2.3e-12	253280	0	253280	Z-score	European	2014	25282103
49	SUB1	rs1173743*	5	32775047	rs1173756	32789852	0.96849	Pulse pressure	Blood pressure	-	-	6.85e-09	74064	-	-	-	European	2011	21909110
49	SUB1	rs1173743*	5	32775047	rs1173756	32789852	0.96849	Hip circumference adjusted for BMI	BMI/ Waist circumference/ Hip circumference	0.02	0.0035	9.6e-09	225491	0	225491	IVNT	Mixed	2015	25673412
50	HCN1	rs10039283	5	45864843	rs4276421	45802079	0.97561	P wave duration	ECG traits	0.61	0.08962	1e-11	-	-	-	ms_increase	Mixed	2017	28794112
51	NR2F1	rs4869412	5	92455655	rs5869600	92452779	1	Clear cell ovarian cancer	Cancer	-	-	-	42307	1366	40941	log OR	European	2017	28346442
51	NR2F1	rs4869412	5	92455655	rs5869600	92452779	1	Epithelial ovarian cancer	Cancer	-	-	-	43705	2764	40941	log OR	European	2017	28346442
51	NR2F1	rs4869412	5	92455655	rs5869600	92452779	1	Low grade serous ovarian cancer	Cancer	-	-	-	41953	1012	40941	log OR	European	2017	28346442
52*	FER	rs6889995	5	108210304	rs10041657	108152428	0.96034	Waist circumference adjusted for BMI	BMI/ Waist circumference/ Hip circumference	-0.025	0.0038	9.1e-11	245749	0	245749	IVNT	Mixed	2015	25673412
52	FER	rs6889995	5	108210304	rs6594341	108211588	1	Height	Height	-0.025	0.0036	5.6e-12	253280	0	253280	Z-score	European	2014	25282103
60	HDGFL1	rs6922960	6	22570189	rs6922960	22570189	1	Coronary artery disease	Coronary artery disease/ Coronary heart disease	0.0429	0.0062	6.037e-12	547261	122733	424528	log OR	Mixed	2018	29212778
63	TFEB	rs1015149	6	41658889	rs1015149	41658889	1	Mean corpuscular volume	Blood traits	-	-	1.16e-09	71861	-	-	-	Mixed	2012	23222517
66	TCF21	rs12190287	6	134214525	rs12190287	134214525	1	Coronary artery disease	Coronary artery disease/ Coronary heart disease	0.1032	0.01568	4.64e-11	84264	21976	62288	log OR	European	2011	21378990
66	TCF21	rs12190287	6	134214525	rs12190287	134214525	1	Coronary artery disease	Coronary artery disease/ Coronary heart disease	-	-	4.94e-13	194427	-	-	-	Mixed	2013	23202125
66	TCF21	rs12190287	6	134214525	rs12190287	134214525	1	Coronary artery disease	Coronary artery disease/ Coronary heart disease	-	-	1.07e-12	5714	-	-	-	Asian	2013	23364394
66	TCF21	rs12190287	6	134214525	rs12190287	134214525	1	Coronary artery disease age 50	Coronary artery disease/ Coronary heart disease	-	-	5.34e-09	194427	-	-	-	Mixed	2013	23202125
66	TCF21	rs12190287	6	134214525	rs12190287	134214525	1	Coronary artery disease males	Coronary artery disease/ Coronary heart disease	-	-	3.51e-09	194427	-	-	-	Mixed	2013	23202125
66	TCF21	rs12190287	6	134214525	rs12190287	134214525	1	Coronary artery disease with myocardial infarction	Coronary artery disease/ Coronary heart disease	-	-	3.05e-10	194427	-	-	-	Mixed	2013	23202125
66	TCF21	rs12190287	6	134214525	rs12190287	134214525	1	Coronary artery disease	Coronary artery disease/ Coronary heart disease	-	-	2e-09	-	-	-	-	Unspecified	2013	24262325
66	TCF21	rs12190287	6	134214525	rs12190287	134214525	1	Coronary artery disease	Coronary artery disease/ Coronary heart disease	0.064	0.0064	8.771e-24	547261	122733	424528	log OR	Mixed	2018	29212778
66	TCF21	rs12190287	6	134214525	rs162185	134226147	0.85021	Coronary artery disease	Coronary artery disease/ Coronary heart disease	0.05488	0.00866	2.45e-10	148715	10801	137914	log OR	Mixed	2017	28714975
73	SEMA3A	rs62472627	7	83998676	rs62472985	84197311	0.8045	Hirschsprung disease	Hirschsprung disease	0.5539	0.08333	3e-11	-	-	-	log_OR	Mixed	2018	29379196
78	RBPMS	rs4545054	8	30302465	rs2979531	30383013	0.85505	Height	Height	0.013	0.0022	6.5e-09	458927	0	458927	IVNT	Mixed	2017	28146470
80	RP11-1082L8.3	rs35006907	8	125859817	rs12541595	125857359	0.97792	Left ventricle diastolic internal dimension	Cardiac structure	0.023	0.00313	2e-13	-	-	-	cm_decrease	European	2017	28394258
84	ASTN2	rs1407243	9	119314851	rs1895062	119313486	0.9919	Height	Height	-0.019	0.003	9.4e-11	253280	0	253280	Z-score	European	2014	25282103
84	ASTN2	rs1407243	9	119314851	rs1895062	119313486	0.9919	Breast cancer	Cancer	-0.06188	0.007995	1e-14	-	-	-	log_OR	Mixed	2017	29059683
95	MPPED2	rs553951	11	30432176	rs553951	30432176	1	Height	Height	-0.02	0.0034	1.9e-09	253280	0	253280	Z-score	European	2014	25282103
97	PCNXL3	rs12801636	11	65391317	rs12801636	65391317	1	Coronary_artery_disease	Coronary artery disease/ Coronary heart disease	-0.0498	0.0087	9.72e-09	236985	-	-	log_OR	Mixed	2017	28530674
97	PCNXL3	rs12801636	11	65391317	rs12801636	65391317	1	Coronary artery disease	Coronary artery disease/ Coronary heart disease	0.0441	0.006635	3e-11	-	-	-	unit_decrease	Mixed	2018	29212778
97	PCNXL3	rs12801636	11	65391317	rs12801636	65391317	1	HDL cholesterol levels	Lipids	0.0235	0.003758	4e-10	-	-	-	unit_increase	Asian	2017	28334899
104	MIR6074	rs4026608	12	66394664	rs4026608	66394664	1	Aorta	Aorta	-	-	2e-09	-	-	-	-	European	2009	19584346
104	MIR6074	rs4026608	12	66394664	rs4026608	66394664	1	Height	Height	-0.024	0.0032	9.8e-14	253280	0	253280	Z-score	European	2014	25282103
104	MIR6074	rs4026608	12	66394664	rs4026608	66394664	1	Height	Height	-0.022	0.0022	8.9e-24	458927	0	458927	IVNT	Mixed	2017	28146470
104	MIR6074	rs4026608	12	66394664	rs4026608	66394664	1	Aortic root size	Aorta	0.03	0.005002	2e-09	-	-	-	cm_decrease	European	2009	19584346
104	MIR6074	rs4026608	12	66394664	rs34550199	66396656	0.93403	Clear cell ovarian cancer	Cancer	-	-	-	42307	1366	40941	log OR	European	2017	28346442
104	MIR6074	rs4026608	12	66394664	rs34550199	66396656	0.93403	Epithelial ovarian cancer	Cancer	-	-	-	43705	2764	40941	log OR	European	2017	28346442
104	MIR6074	rs4026608	12	66394664	rs34550199	66396656	0.93403	Low grade serous ovarian cancer	Cancer	-	-	-	41953	1012	40941	log OR	European	2017	28346442
105	SLC6A15	rs10862858	12	84806298	rs79243047	84807690	1	Clear cell ovarian cancer	Cancer	-	-	-	42307	1366	40941	log OR	European	2017	28346442
105	SLC6A15	rs10862858	12	84806298	rs79243047	84807690	1	Epithelial ovarian cancer	Cancer	-	-	-	43705	2764	40941	log OR	European	2017	28346442
105	SLC6A15	rs10862858	12	84806298	rs79243047	84807690	1	Low grade serous ovarian cancer	Cancer	-	-	-	41953	1012	40941	log OR	European	2017	28346442
108	UBE3B	rs2004359	12	109976893	rs2338104	109895168	0.996	Cholesterol hdl	Lipids	-	-	1e-10	-	-	-	-	European	2008	19060906
108	UBE3B	rs2004359	12	109976893	rs7134594	110000193	0.9801	Cholesterol hdl	Lipids	-	-	7e-15	-	-	-	-	Mixed	2010	20686565
108	UBE3B	rs2004359	12	109976893	rs7298565	109937534	1	HDL cholesterol	Lipids	-	-	3.32e-10	19840	-	-	-	European	2008	19060906
108	UBE3B	rs2004359	12	109976893	rs7298565	109937534	1	HDL cholesterol	Lipids	-	-	1.665e-14	100184	-	-	-	Mixed	2010	20686565
108	UBE3B	rs2004359	12	109976893	rs2241210	109950144	1	HDL cholesterol levels	Lipids	-0.0332	0.003299	8e-24	-	-	-	unit_decrease	Asian	2017	28334899
108	UBE3B	rs2004359	12	109976893	rs2241215	109925489	1	High density lipoprotein	Lipids	0.0311	0.0042	1.656e-13	187167	0	187167	IVNT	European	2013	24097068
108	UBE3B	rs2004359	12	109976893	rs7298565	109937534	1	High density lipoprotein	Lipids	0.0349	0.0049	1.665e-14	99900	0	99900	Z-score	Mixed	2010	20686565
108	UBE3B	rs2004359	12	109976893	rs2338104	109895168	0.996	MMAB gene expression in human liver	MMAB gene expression	-	-	4e-43	19840	-	-	-	European	2008	19060906
108	UBE3B	rs2004359	12	109976893	rs7134594	110000193	0.9801	MMAB gene expression in human omental fat	MMAB gene expression	-	-	1e-72	100184	-	-	-	Mixed	2010	20686565
108	UBE3B	rs2004359	12	109976893	rs7134594	110000193	0.9801	MMAB trancript levels in human subcutaneous fat	MMAB gene expression	-	-	4e-53	100184	-	-	-	Mixed	2010	20686565
115	NFKBIA	rs8904	14	35871217	rs696	35871093	0.99166	Height	Height	0.02	0.0033	3.7e-09	253280	0	253280	Z-score	European	2014	25282103
115	NFKBIA	rs8904	14	35871217	rs696	35871093	0.99166	Lymphocyte counts	Blood traits	-0.02706	0.003745	5e-13	-	-	-	unit_increase	European	2016	27863252
115	NFKBIA	rs8904	14	35871217	rs8904	35871217	1	Systolic blood pressure	Blood pressure	-0.311	0.04362	1e-12	-	-	-	unit_increase	European	2017	28739976
122	HCN4	rs8039168	15	73664723	rs4489968	73665506	1	Atrial fibrillation	Atrial fibrillation	-	-	1.85e-12	92355	-	-	-	Mixed	2013	23583979
122	HCN4	rs8039168	15	73664723	rs8038766	73663314	1	Heart rate	Heart rate	0.5628	0.083	1.124e-10	93158	0	93158	bpm	Mixed	2013	23583979
122	HCN4	rs8039168	15	73664723	rs4489968	73665506	1	Heart rate in non diabetics T2D	Heart rate	-	-	3.9e-12	92355	-	-	-	Mixed	2013	23583979
122	HCN4	rs8039168	15	73664723	rs4489968	73665506	1	Heart rate in non diabetics T2D with additional exclusion of MI HF Afib Heart block heart rate altering medications extremes of HR	Heart rate	-	-	2.4e-12	92355	-	-	-	Mixed	2013	23583979
122	HCN4	rs8039168	15	73664723	rs4489968	73665506	1	Heart rate in non hypertensives	Heart rate	-	-	3.3e-12	92355	-	-	-	Mixed	2013	23583979
122	HCN4	rs8039168	15	73664723	rs4489968	73665506	1	Heart rate in non hypertensives with additional exclusion of MI HF Afib Heart block heart rate altering medications extremes of HR	Heart rate	-	-	4.6e-12	92355	-	-	-	Mixed	2013	23583979
122	HCN4	rs8039168	15	73664723	rs4489968	73665506	1	Heart rate in non obese non cancer and non kidney stone individuals	Heart rate	-	-	4.6e-12	92355	-	-	-	Mixed	2013	23583979
122	HCN4	rs8039168	15	73664723	rs4489968	73665506	1	Heart rate in non obese non cancer and non kidney stone individuals with additional exclusion of MI HF Afib Heart block heart rate altering medications extremes of HR	Heart rate	-	-	4.7e-12	92355	-	-	-	Mixed	2013	23583979
122	HCN4	rs8039168	15	73664723	rs4489968	73665506	1	Heart rate with additional exclusion of MI HF Afib Heart block heart rate altering medications extremes of HR	Heart rate	-	-	3.8e-13	92355	-	-	-	Mixed	2013	23583979
122	HCN4	rs8039168	15	73664723	rs4489968	73665506	1	Heart rate with age12	Heart rate	-	-	1.9e-10	92355	-	-	-	Mixed	2013	23583979
122	HCN4	rs8039168	15	73664723	rs4489968	73665506	1	Heart rate with age12 with additional exclusion of MI HF Afib Heart block heart rate altering medications extremes of HR	Heart rate	-	-	2.1e-10	92355	-	-	-	Mixed	2013	23583979
122	HCN4	rs8039168	15	73664723	rs7173389	73663903	1	Resting heart rate	Heart rate	-0.5393	0.04527	1e-32	-	-	-	unit_decrease	Mixed	2016	27798624
123	ALPK3	rs6496452	15	85372645	rs2115630	85364516	0.94069	P wave terminal force	ECG traits	-85	13.73	6e-10	-	-	-	ms_x_uV_increase	Mixed	2017	28794112
129	CNOT1	rs7199856	16	58584772	rs7188697	58622178	0.99459	Electrocardiography	ECG traits	-	-	7e-25	-	-	-	-	European	2009	19305409
129	CNOT1	rs7199856	16	58584772	rs246196	58574253	1	QT interval	ECG traits	1.73	0.1083	2e-57	-	-	-	unit_decrease	European	2014	24952745
129	CNOT1	rs7199856	16	58584772	rs1549607	58583975	0.99459	QT interval	ECG traits	-	-	2.03e-12	15842	-	-	-	European	2009	19305409
129	CNOT1	rs7199856	16	58584772	rs37062	58567238	0.97842	QT interval	ECG traits	-	-	3e-25	13685	-	-	-	European	2009	19305408
133	EFCAB5	rs55866125	17	28312993	rs62070270	28263980	0.86198	Lung function FEV1FVC	ECG traits	0.034	0.003947	7e-18	-	-	-	unit_decrease	European	2017	28166213
133	EFCAB5	rs55866125	17	28312993	rs7211246	28485762	0.88836	QRS complex 12 leadsum	ECG traits	-	-	6e-09	-	-	-	unit_increase	Mixed	2016	27659466
136	PRKCA	rs9909004	17	64306133	rs9892651	64303793	1	QT interval	ECG traits	0.74	0.09739	3e-14	-	-	-	unit_decrease	European	2014	24952745
136	PRKCA	rs9909004	17	64306133	rs9912468	64318357	0.9762	Height	Height	-0.014	0.0023	9.1e-10	458927	0	458927	IVNT	Mixed	2017	28146470
136	PRKCA	rs9909004	17	64306133	rs9912468	64318357	0.9762	QRS complex 12 leadsum	ECG traits	-	-	5e-11	-	-	-	-	Mixed	2016	27659466
136	PRKCA	rs9909004	17	64306133	rs9912468	64318357	0.9762	QRS complex Sokolow Lyon	ECG traits	-	-	3e-12	-	-	-	unit_increase	Mixed	2016	27659466
136	PRKCA	rs9909004	17	64306133	rs9912468	64318357	0.9762	QRS duration	ECG traits	-0.38	0.05876	1e-10	-	-	-	millisecond_decrease	Mixed	2016	27577874
136	PRKCA	rs9909004	17	64306133	rs9912468	64318357	0.9762	QRS duration	ECG traits	-	-	2e-11	-	-	-	-	Mixed	2016	27659466
138	AC100791.2	rs745570	17	77781725	rs745570	77781725	1	Breast cancer	Cancer	-0.05129	0.008396	1e-09	-	-	-	log_OR	European	2015	25751625
138	AC100791.2	rs745570	17	77781725	rs2587507	77790135	0.94897	Body mass index	BMI/ Waist circumference/ Hip circumference	-0.015	0.0021	6.7e-13	526508	0	526508	IVNT	Mixed	2018	29273807
145	TMEM59L	rs111551996	19	18733355	rs111551996	18733355	1	Coronary artery disease	Coronary artery disease/ Coronary heart disease	-0.0783	0.0136	8.903e-09	547261	122733	424528	log OR	Mixed	2018	29212778
147	KIAA1755	rs6023939	20	36832526	rs6023939	36832526	1	Heart rate	Heart rate	-0.4996	0.0512	1.706e-20	93158	0	93158	bpm	Mixed	2013	23583979
147	KIAA1755	rs6023939	20	36832526	rs6127471	36844038	0.9443	Heart rate in non diabetics T2D	Heart rate	-	-	4.9e-21	92355	-	-	-	Mixed	2013	23583979
147	KIAA1755	rs6023939	20	36832526	rs6127471	36844038	0.9443	Heart rate in non diabetics T2D with additional exclusion of MI HF Afib Heart block heart rate altering medications extremes of HR	Heart rate	-	-	1.2e-22	92355	-	-	-	Mixed	2013	23583979
147	KIAA1755	rs6023939	20	36832526	rs6127471	36844038	0.9443	Heart rate in non hypertensives	Heart rate	-	-	2.3e-20	92355	-	-	-	Mixed	2013	23583979
147	KIAA1755	rs6023939	20	36832526	rs6127471	36844038	0.9443	Heart rate in non hypertensives with additional exclusion of MI HF Afib Heart block heart rate altering medications extremes of HR	Heart rate	-	-	8.7e-23	92355	-	-	-	Mixed	2013	23583979
147	KIAA1755	rs6023939	20	36832526	rs6127471	36844038	0.9443	Heart rate in non obese non cancer and non kidney stone individuals	Heart rate	-	-	6.7e-20	92355	-	-	-	Mixed	2013	23583979
147	KIAA1755	rs6023939	20	36832526	rs6127471	36844038	0.9443	Heart rate in non obese non cancer and non kidney stone individuals with additional exclusion of MI HF Afib Heart block heart rate altering medications extremes of HR	Heart rate	-	-	8.9e-22	92355	-	-	-	Mixed	2013	23583979
147	KIAA1755	rs6023939	20	36832526	rs6127471	36844038	0.9443	Heart rate with additional exclusion of MI HF Afib Heart block heart rate altering medications extremes of HR	Heart rate	-	-	6.5e-24	92355	-	-	-	Mixed	2013	23583979
147	KIAA1755	rs6023939	20	36832526	rs6127471	36844038	0.9443	Heart rate with age12	Heart rate	-	-	8.4e-18	92355	-	-	-	Mixed	2013	23583979
147	KIAA1755	rs6023939	20	36832526	rs6127471	36844038	0.9443	Heart rate with age12 with additional exclusion of MI HF Afib Heart block heart rate altering medications extremes of HR	Heart rate	-	-	1.4e-19	92355	-	-	-	Mixed	2013	23583979
147	KIAA1755	rs6023939	20	36832526	rs4811602	36849088	0.92099	Photic sneeze reflex	Photic sneeze reflex	-	-	3e-31	-	-	-	-	European	2016	27182965
147	KIAA1755	rs6023939	20	36832526	rs6123471	36840156	0.95596	Resting heart rate	Heart rate	0.5953	0.0332	7e-72	-	-	-	unit_decrease	Mixed	2016	27798624
149	PHF5A	rs9607805	22	41854446	rs9607805	41854446	1	Neuroticism	Neuroticism	-7.175	0.9994	7e-13	-	-	-	Z-score_decrease	European	2017	29255261
