# Supplementary material for: Multi-ancestry GWAS of the electrocardiographic PR interval identifies 202 loci underlying cardiac conduction
Source: Nat Commun. 2020 May 21;11:2542. doi: 10.1038/s41467-020-15706-x (PMC7242331; doi:10.1038/s41467-020-15706-x)
Supplement: Supplementary file 21 — Supplementary Data 18 [file 41467_2020_15706_MOESM21_ESM.xlsx]

## Sheet: SD18 insilico plausible genes 
Supplementary Data 18 Genes indicated by bioinformatics and in silico functional annotations at the 149 at previously not reported loci for PR interval.
Nearest gene(s): Nearest annotated gene(s) to the lead variant; Chr, chromosome; Position, physical position in build 37; EA, effect allele; OA, other allele.
1 Lead or conditionally independent variant(s) or their proxies (r2>0.8) in the locus were annotated as nonsynonymous using Variant Effect Predictor.
2 Significant cis-eQTL results (false discovery rate ≤ 0.05) from GTEx version 7. Details of laboratory and analysis methods can be found at GTEx Portal (www.gtexportal.org). eQTLs indicated are those which have evidence of colocalisation (significant threshold of posterior probability (PP) of one common causal variant at PP >0.75).
3 Genes whose predicted gene expression in left ventricle and right atrial appendage tissues was associated with PR interval duration.
4 Within a locus of r2>0.5 from the associated variant DEPICT prioritizes genes that share predicted functions with other associated loci.
In red, loci with genes causing monogenic arrhythmia syndromes and or/cardiomyopathies
Locus ID	rsID	Chr	Position	MarkerName	EA	OA	Nearest gene(s)	Genes at the locus (r2>0.5 with the lead or conditionally independent variant(s))	Nonsynonymous variants1	eQTL2 GTEx left ventricle tissue	eQTL2 GTEx right atrial appendage tissue	S-PrediXcan Heart GTEx left ventricle and/or right atrial appendage tissues3	Left ventricle best HiC locus interactor (RegulomeDB score ≤ 2)	DEPICT prioritised gene at FDR 1%4	Animal model with CV phenotype	Association with Mendelian disease	Mendelian disease with cardiovascular phenotype	OMIM reference
Multi-ancestry meta-analysis
1	rs7529220	1	22282619	1:22282619:C:T	C	T	HSPG2	HSPG2						HSPG2
2	rs12031946	1	26679041	1:26679041:C:T	C	T	AIM1L	CNKSR1, RP11-231P20.2, LOC101928303, CEP85, SH3BGRL3, UBXN11, CD52, AIM1L, ZNF683						ZNF683
3	rs1475267	1	36620801	1:36620801:C:G	G	C	MAP7D1	MAP7D1, RN7SL131P					SNIP1	MAP7D1
4	rs12751675	1	41955714	1:41955714:A:G	G	A	EDN2	EDN2		EDN2	EDN2	EDN2
5	rs603901	1	54741767	1:54741767:C:T	T	C	SSBP3	SSBP3		SSBP3 MRPL37	SSBP3 MRPL37	SSBP3 MRPL37		SSBP3
6	rs6587924	1	61895257	1:61895257:A:C	A	C	NFIA	NFIA						NFIA
7	rs13447455	1	91966445	1:91966445:A:G	A	G	CDC7	CDC7, RP11-47K11.2					TGFBR3		TGFBR3
8	rs1692144	1	147281349	1:147281349:C:T	C	T	GJA5	RP11-314N2.2, GJA5 NBPF13P, PRKAB2, RP11-337C18.8, FMO5, RP11-337C18.10, CHD1L, RP11-337C18.4	CHD1L				PDE4DIP	GJA5	GJA5	GJA5	Atrial Fibrillation, familial 11	614049
9	rs531706	1	168692137	1:168692137:C:G	C	G	DPT	DPT						DPT
10	rs61824886	1	170615660	1:170615660:C:G	C	G	PRRX1	RP11-545I10.2, RP1-79C4.1, PRRX1					METTL11B	PRRX1
11	rs819636	1	200271408	1:200271408:C:T	C	T	C1orf98	C1orf98
12	rs6678632	1	221138612	1:221138612:C:T	T	C	HLX	HLX					C1orf140	HLX
13	rs3768419	1	227173477	1:227173477:C:G	C	G	ADCK3	ADCK3, CDC42BPA					CDC42BPA	CDC42BPA
14	rs1285678	1	232712145	1:232712145:A:G	A	G	SIPA1L2	SIPA1L2						SIPA1L2
15	rs10802580	1	237194922	1:237194922:A:G	G	A	RYR2	RYR2						RYR2	RYR2	RYR2	Ventricular tachycardia, catecholaminergic polymorphic, 1 and Arrhythmogenic right ventricular dysplasia 2	604772 and 600996
16	rs28468565	1	246157144	1:246157144:A:G	A	G	SMYD3	SMYD3					KIF26B
17	rs12616546	2	4824622	2:4824622:A:G	A	G	LINC01249	SNORA31, LINC01249
18	rs17496249	2	37102249	2:37102249:A:G	A	G	STRN	STRN, HEATR5B			STRN		HEATR5B		STRN
19	rs6728830	2	42537995	2:42537995:A:C	C	A	EML4	EML4						EML4
20	rs11894252	2	46533376	2:46533376:C:T	T	C	EPAS1	EPAS1						EPAS1	EPAS1
21	rs7588761	2	48150587	2:48150587:C:T	T	C	FBXO11	MSH6, FBXO11, AC079807.1, AC079807.4						FBXO11
22	rs4519566	2	54824815	2:54824815:A:G	G	A	SPTBN1	SPTBN1, EML6					SPTBN1	SPTBN1 AC093110.1	SPTBN1
23	rs7584373	2	68079211	2:68079211:A:G	A	G	LINC01812/C1D	LINC01812, C1D
24	rs13006682	2	106104856	2:106104856:C:T	C	T	FHL2/LOC285000	FHL2, LOC285000						FHL2	FHL2
25	rs17816356	2	134326085	2:134326085:A:C	A	C	NCKAP5	NCKAP5					LYPD1	MGAT5
26	rs76909456	2	145453968	2:145453968:A:G	G	A	TEX41	TEX41, AC023128.1
27	rs138711926	2	187033804	2:187033804:A:G	G	A	LINC01473/ZC3H15	LOC101927196,FSIP2,RPL21P32,RP11-410E4.1,MED28P3,ZC3H15,ITGAV,FAM171B,AC007319.1						ITGAV
28	rs58577564	2	192723128	2:192723128:A:T	A	T	SDPR	SDPR, AC098617.1						SDPR	SDPR
31	rs13023533	2	220414019	2:220414019:C:T	T	C	TMEM198	ASIC4,CHPF,TMEM198,OBSL1	OBSL1					OBSL1 DES SPEG CHPF	SPEG	SPEG, DES	SPEG: Centronuclear myopathy 5 (some cases with dilated cardiomyopathy). DES: Cardiomyopathy, dilated, 1I	615959 &604765
32	rs6442433	3	14275759	3:14275759:C:G	C	G	LSM3	LSM3			SLC6A6	SLC6A6	GRIP2
33	rs60325252	3	24465080	3:24465080:C:T	C	T	THRB	THRB		THRB	THRB	THRB
34	rs11921457	3	42103045	3:42103045:G:T	T	G	TRAK1	ULK4, TRAK1		TRAK1	TRAK1	TRAK1		TRAK1
35	rs9865051	3	49166069	3:49166069:C:T	T	C	LAMB2	NCKIPSD,IP6K2,PRKAR2A,SLC25A20,ARIH2,P4HTM,WDR6,IMPDH2,QRICH1,LAMB2,RP11-694I15.7,KLHDC8B,C3orf84,CCDC36,C3orf62,USP4,GPX1,RHOA,TCTA,NICN1,RNA5SP130,DAG1,BSN-AS2,BSN, DALRD3	DALRD3	QRICH1	AMT	QRICH1	ZNF589 CCDC51	LAMB2 DAG1 KLHDC8B PRKAR2A	SLC25A20	SLC25A20	Carnitine-acylcarnitine translocase deficiency	613698
36	rs1000368	3	123117165	3:123117165:C:T	T	C	ADCY5	ADCY5			ADCY5			ADCY5
37	rs201481721	3	150176904	3:150176904:D:I	D	I	TSC22D2	TSC22D2						TSC22D2
38	rs4680046	3	153000092	3:153000092:C:T	T	C	RAP2B	RAP2B						RAP2B
40	rs4894803	55	171800256	3:171800256:A:G	G	A	FNDC3B	FNDC3B						FNDC3B
41	rs4687352	3	192373761	3:192373761:A:C	A	C	FGF12	FGF12						FGF12
42	rs143879787	3	196799232	3:196799232:D:I	I	D	DLG1	DLG1						DLG1
43	rs77422711	4	56123105	4:56123105:A:G	A	G	SRD5A3	SRD5A3,TMEM165,PDCL2,NMU						CLOCK	SRD5A3
44	rs28540500	4	62409801	4:62409801:C:G	C	G	LPHN3	LPHN3						LPHN3	LPHN3
45	rs36034102	4	81202048	4:81202048:G:T	T	G	FGF5	FGF5						FGF5
46	rs2172448	4	95506214	4:95506214:A:G	A	G	PDLIM5	PDLIM5						PDLIM5	PDLIM5
48	rs4975572	5	1054197	5:1054197:C:T	T	C	SLC12A7	NKD2, SLC12A7						SLC12A7
49	rs17441816	5	32629419	5:32629419:A:G	G	A	SUB1	SUB1, NPR3					SLC45A2	NPR3	NPR3
50	rs10039283	5	45864843	5:45864843:A:G	A	G	HCN1	HCN1,CTD-2013M15.1							HCN1
51	rs4869412	5	92455655	5:92455655:A:G	G	A	NR2F1	NR2F1,CTD-2091N23.1						NR2F1
53	rs67968533	5	111046342	5:111046342:C:T	C	T	STARD4	STARD4,NREP						C5orf13
54	rs12654442	5	124343851	5:124343851:C:T	T	C	LOC101927421/ZNF608	LOC101927421, ZNF608					ZNF608	ZNF608
55	rs2577531	5	128299279	5:128299279:C:T	C	T	SLC27A6	SLC27A6						SLC27A6
56	rs78810186	5	170868622	5:170868622:C:T	T	C	FGF18	FGF18						FGF18
57	rs4868384	5	173779209	5:173779209:A:T	T	A	LINC01411	LINC01411 MSX2			RP11-267A15.1		ATP6V0E1
58	rs72825038	6	7527269	6:7527269:A:G	A	G	DSP	DSP, RP11-288G3.4	DSP					DSP	DSP	DSP	Cardiomyopathy, dilated, with woolly hair and keratoderma, Dilated cardiomyopathy with woolly hair, keratoderma, and tooth agenesis and Arrhythmogenic right ventricular dysplasia 8	615821 and 607450
59	rs214502	6	18227546	6:18227546:A:C	A	C	DEK	KDM1B, DEK, Y_RNA, RNF144B			DEK	DEK	FAM8A1
60	rs6922960	6	22570189	6:22570189:C:T	C	T	HDGFL1	HDGFL1,RP1-309H15.2
61	rs139915396	6	25351477	6:25351477:D:I	I	D	LRCC16A	LRCC16A
62	rs730506	6	36645968	6:36645968:C:G	C	G	CDKN1A	Y_RNA,CDKN1A						CDKN1A
63	rs1015149	6	41658889	6:41658889:C:T	T	C	TFEB	TFEB					KCNK5	TFEB
64	rs871728	6	46452619	6:46452619:C:T	C	T	RCAN2	RCAN2,LOC101926898,CYP39A1		RP11-795J1.1	RCAN2	RCAN2		RCAN2
65	rs111739590	6	113978255	6:113978255:C:T	C	T	LOC101927686	LOC101927686						MARCKS
66	rs12190287	6	134214525	6:134214525:C:G	G	C	TCF21	MGC34034,TCF21						TCF21	TCF21
67	rs206708	6	164532059	6:164532059:A:T	A	T	RP1-155D22.1	RP1-155D22.1
68	rs10226357	7	925949	7:925949:A:G	G	A	GET4	SUN1, GET4						SUN1
69	rs56352403	7	14453835	7:14453835:A:G	G	A	DGKB	DGKB					ETV1		ETV1	ETV1
70	rs6961768	7	18040476	7:18040476:A:C	A	C	PRPS1L1	PRPS1L1, AC080080.1
71	rs62441680	7	21622494	7:21622494:C:T	C	T	DNAH11	DNAH11	DNAH11		DNAH11	DNAH11	ABCB5		DNAH11	DNAH11	Ciliary dyskinesia, primary, 7, with or without situs inversus	611884
72	rs4720244	7	37398113	7:37398113:C:G	C	G	ELMO1	ELMO1
73	rs62472627	7	83998676	7:83998676:C:T	C	T	SEMA3A	SEMA3A, AC003984.1						SEMA3D	SEMA3A
74	rs1424569	7	136569416	7:136569416:C:T	C	T	CHRM2	CHRM2,hsa-mir-490		CHRM2 hsa-mir-490		CHRM2		CHRM2	CHRM2
75	rs1188285	8	13130478	8:13130478:C:T	C	T	DLC1	DLC1						DLC1	DLC1
76	rs4921804	8	17550623	8:17550623:A:G	G	A	MTUS1	MTUS1					MTMR7	MTUS1	MTUS1
77	rs56317071	8	21775838	8:21775838:C:G	C	G	XPO7	XPO7					INTS10
78	rs4545054	8	30302465	8:30302465:C:T	C	T	RBPMS	RBPMS, GTF2E2						RBPMS
80	rs35006907	8	125859817	8:125859817:A:C	A	C	RP11-1082L8.3	RP11-1082L8.3, LINC00964		MTSS1 LINC00964	MTSS1	MTSS1 LINC00964
81	rs10106406	8	142006198	8:142006198:C:G	C	G	PTK2	AGO2, PTK2					PTK2 DENND3	PTK2	PTK2
82	rs6560168	9	73482647	9:73482647:A:T	T	A	TRPM3	TRPM3
83	rs7043482	9	85135915	9:85135915:A:C	A	C	SPATA31D5P - RASEF	RASEF, RP11-15B24.2
84	rs1407243	9	119314851	9:119314851:C:T	C	T	ASTN2	ASTN2
85	rs4584185	9	134203545	9:134203545:C:T	C	T	PLPP7	PLPP7		PPAPDC3		PPAPDC3
86	rs7916672	10	13534234	10:13534234:C:T	T	C	BEND7	BEND7					NUDT5
87	rs2947080	10	32847962	10:32847962:C:G	G	C	CCDC7	CCDC7						ITGB1, CCDC7
88	rs10776558	10	50510406	10:50510406:C:T	C	T	CEFIP	CEFIP	CEFIP				WDFY4	CEFIP
89	rs74813029	10	63194576	10:63194576:A:G	A	G	TMEM26	TMEM26,TMEM26-AS1						TMEM26
90	rs2642608	10	71559723	10:71559723:C:T	T	C	COL13A1	COL13A1						COL13A1	COL13A1
91	rs1769758	10	80898969	10:80898969:G:T	T	G	ZMIZ1	ZMIZ1 ZCCHC24					LINC00856 ZCCHC24	ZMIZ1	ZMIZ1
92	rs117443987	10	88509088	10:88509088:A:T	T	A	U3	LDB3,U3,RP11-359E3.4,BMPR1A						BMPR1A LDB3	BMPR1A LDB3	BMPR1A LDB3	Cardiomyopathy, dilated, 1C, with or without left ventricular noncompaction, CMD1C.	601493
93	rs67234920	10	115782061	10:115782061:A:G	G	A	ADRB1	ADRB1						ADRB1	ADRB1
94	rs2912774	10	123348662	10:123348662:G:T	T	G	FGFR2	FGFR2						FGFR2	FGFR2
95	rs553951	11	30432176	11:30432176:C:T	C	T	MPPED2	MPPED2						MPPED2
96	rs11031737	11	32372772	11:32372772:A:G	G	A	WT1	WT1							WT1
97	rs12801636	11	65391317	11:65391317:A:G	A	G	PCNXL3	KCNK7,PCNXL3,SIPA1						MAP3K11 PCNXL3
98	rs12808601	11	111776066	11:111776066:A:G	G	A	CRYAB	ALG9,C11orf1,RPL37AP8,CRYAB, FDXACB1		C11orf1	C11orf1	C11orf1		CRYAB DIXDC1		CRYAB	Cardiomyopathy, dilated, 1	615184
99	rs144789148	11	113666335	11:113666335:A:G	G	A	USP28	USP28						USP28
100	rs10770646	12	20544361	12:20544361:C:T	T	C	PDE3A	PDE3A						PDE3A		PDE3A	Hypertension and brachydactyly syndrome	112410
101	rs78518764	12	26306484	12:26306484:C:T	T	C	SSPN	SSPN						SSPN
102	rs76611452	12	46209520	12:46209520:C:T	T	C	ARID2	ARID2					RNY5		ARID2
103	rs17099893	12	64283014	12:64283014:A:G	A	G	SRGAP1	AC084357.1,SRGAP1, RASSF3					FAM19A2	SRGAP1
104	rs4026608	12	66394664	12:66394664:C:T	T	C	MIR6074	MIR6074, HMGA2
105	rs10862858	12	84806298	12:84806298:A:G	A	G	SLC6A15	RP11-228G3.1						TMTC2
106	rs2629745	12	104503806	12:104503806:A:G	A	G	HCFC2	HCFC2,NFYB,RP11-818F20.4,TXNRD1
107	rs3759310	12	107166122	12:107166122:C:G	G	C	RIC8B	RFX4,RP11-144F15.1,RIC8B,EEF1B2P4						RFX4	RIC8B
108	rs2004359	12	109976893	12:109976893:G:T	G	T	UBE3B	MYO1H,KCTD10,UBE3B,MMAB,MVK	UBE3B MMAB				UBE3B KCTD10	UBE3B KCTD10
109	rs7972416	12	117491824	12:117491824:A:G	A	G	TESC	FBXW8,TESC		TESC				TESC
110	rs9634754	13	39261151	13:39261151:G:T	G	T	FREM2	LINC00437,FREM2	FREM2					FREM2
111	rs9513995	13	102878269	13:102878269:C:T	T	C	FGF14	FGF14
112	rs12885183	14	21545230	14:21545230:A:G	G	A	ARHGEF40	ARHGEF40,ZNF219					NDRG2	ARHGEF40 ZNF219
113	rs7146955	14	29750244	14:29750244:A:G	G	A	RP11-562L8.1	RP11-562L8.1
114	rs3784192	14	32923336	14:32923336:A:G	A	G	AKAP6	AKAP6					GPR33		AKAP6
115	rs8904	14	35871217	14:35871217:A:G	G	A	NFKBIA	NFKBIA
116	rs1255908	14	64457638	14:64457638:G:T	T	G	SYNE2	SYNE2			SYNE2	SYNE2		SYNE2	SYNE2	SYNE2	Emery-Dreifuss muscular dystrophy 5, autosomal dominant	612999
117	rs17712080	14	86041160	14:86041160:A:G	G	A	FLRT2	FLRT2						FLRT2	FLRT2
118	rs179145	14	95983975	14:95983975:A:G	A	G	RP11-1070N10.3	RP11-1070N10.3			RP11-1070N10.3	RP11-1070N10.3
119	rs3759579	14	103851272	14:103851272:A:G	A	G	MARK3	MARK3,CKB						CKB MARK3
120	rs3935716	15	65035979	15:65035979:A:G	A	G	RBPMS2	CSNK1G1,KIAA0101,TRIP4,ZNF609,RP11-702L15.4,OAZ2,AC100830.3,RBPMS2,PLEKHO2	RBPMS2	TRIP4	TRIP4	TRIP4	OAZ2 ANKDD1A TLN2	RBPMS2
121	rs11330601	15	69021265	15:69021265:D:I	I	D	CORO2B	CORO2B
122	rs8039168	15	73664723	15:73664723:A:T	A	T	HCN4	HCN4						HCN4	HCN4	HCN4	Sick sinus syndrome 2 and Brugada syndrome 8	163800 and 613123
123	rs6496452	15	85372645	15:85372645:A:T	A	T	ALPK3	ZSCAN2,SCAND2P,WDR73,NMB,SEC11A,ZNF592,ALPK3		WDR73	WDR73	WDR73	SCAND2P		ALPK3	ALPK3	Cardiomyopathy, familial hypertrophic 27	618052
124	rs62008078	15	96460899	15:96460899:C:T	C	T	LINC00924 - NR2F2	NR2F2, LINC00924					MIR1469		NR2F2	NR2F2	Congenital heart defects, multiple types, 4	615779
125	rs35816944	16	1828030	16:1828030:A:G	G	A	SPSB3	BAIAP3,CLCN7,IFT140,MAPK8IP3,NUBP2,MEIOB,SPSB3	SPSB3					CRAMP1L TMEM204
126	rs79321945	16	4282284	16:4282284:A:C	C	A	SRL	SRL,RP11-95P2.1,TFAP4						SRL	SRL
128	rs1186818	16	54598337	16:54598337:A:G	G	A	LOC101927480 - LINC02140	LOC101927480,LINC02140						IRX3
129	rs7199856	16	58584772	16:58584772:G:T	G	T	CNOT1	NDRG4,SETD6,CNOT1	CNOT1	NDRG4					CNOT1
130	rs904199	16	86184639	16:86184639:A:G	G	A	LINC01082 - IRF8	LINC01082, IRF8
131	rs28634651	16	88553198	16:88553198:C:T	T	C	ZFPM1	ZFPM1						ZFPM1
132	rs7774	17	4801163	17:4801163:A:C	A	C	MINK1	MINK1,CHRNE						ENO3
133	rs55866125	17	28312993	17:28312993:C:T	T	C	EFCAB5	ANKRD13B,CORO6,SSH2,EFCAB5,NSRP1,SLC6A4	EFCAB5				EFCAB5	CORO6
134	rs757416	17	48666064	17:48666064:C:T	T	C	CACNA1G	CACNA1G							CACNA1G
135	rs2006122	17	61987405	17:61987405:A:T	T	A	CSHL1	TACO1,RP11-51F16.9,MAP3K3,LIMD2,STRADA,CCDC47,DDX42,FTSJ3,PSMC5,SMARCD2,TCAM1P,CSH2,GH2,RP11-630H24.3,RP11-630H24.4,CSHL1,GH1		MAP3K3 DDX42			TEX2	MAP3K3	TACO1 MAP3K3
136	rs9909004	17	64306133	17:64306133:C:T	C	T	PRKCA	PRKCA		PRKCA	PRKCA			PRKCA	PRKCA
138	rs745570	17	77781725	17:77781725:A:G	G	A	AC100791.2	CBX8,RP11-353N14.1,AC100791.2,RP11-353N14.2	CBX8	CBX8		CBX8	TBC1D16
139	rs11083300	18	26339589	18:26339589:C:G	G	C	CDH2	ARIH2P1,RP11-510D21.1,RP11-510D21.2,CDH2					CDH2	CDH2	CDH2
140	rs982521	18	30029141	18:30029141:C:T	C	T	GAREM	GAREM						GAREM
141	rs1786595	18	32399259	18:32399259:C:T	C	T	DTNA	DTNA					DTNA	DTNA	DTNA	DTNA	Left ventricular noncompaction 1, with or without congenital heart defects	604169
142	rs12961264	18	57138957	18:57138957:C:T	C	T	CCBE1	CCBE1						CCBE1
143	rs3795063	19	1217560	19:1217560:C:G	C	G	STK11	STK11,C19orf26,ATP5D						STK11	ATP5D
144	rs113394178	19	7581244	19:7581244:A:C	A	C	ZNF358	ZNF358			ZNF358			ZNF358
145	rs111551996	19	18733355	19:18733355:G:T	G	T	TMEM59L	C19orf60,KLHL26,TMEM59L						CRLF1
146	rs16989138	20	4031653	20:4031653:A:G	G	A	RNF24	RNF24
147	rs6023939	20	36832526	20:36832526:A:C	C	A	KIAA1755	KIAA1755
148	rs2070464	22	24183875	22:24183875:A:G	G	A	DERL3	DERL3				MMP11		MMP11
149	rs9607805	22	41854446	22:41854446:C:T	T	C	PHF5A	ZC3H7B,LOC100996598,TEF,TOB2,PHF5A,ACO2,POLR3H			L3MBTL2		TOB2	ZC3H7B TEF EP300 CSDC2
European meta-analysis
29	rs2103208	2	203373030	2:203373030:A:G	G	A	BMPR2	AC064836.3,RN7SL40P,BMPR2					NBEAL1		BMPR2	BMPR2	Pulmonary hypertension, familial primary, 1, with or without HHT	178600
30	rs6435953	2	217628087	2:217628087:C:T	C	T	AC007563.5	AC007563.5,AC007563.3					IGFBP5
39	rs6799180	3	158333891	3:158333891:A:G	A	G	MLF1 - GFM1	MLF1,MTAPP1,RP11-79M21.3,GFM1,LXN,RARRES1	MLF1 GFM1 LXN	LXN	MLF1	MLF1	PQLC2L MFSD1
47	rs78277783	4	120070079	4:120070079:A:T	A	T	MYOZ2	MYOZ2,RP11-455G16.1,USP53		MYOZ2					MYOZ2	MYOZ2	Cardiomyopathy, hypertrophic, 16	613838
52	rs6889995	5	108210304	5:108210304:A:G	G	A	FER	LINC01023,FER
79	rs565720	8	103914366	8:103914366:A:C	A	C	AZIN1	AZIN1,KB-1507C5.2,AZIN1-AS1		KB-1507C5.2	KB-1507C5.2
127	rs72772025	16	15834729	16:15834729:C:T	T	C	MYH11	KIAA0430,NDE1,MYH11		NPIPA5		NPIPA5			MYH11	MYH11	Aortic aneurysm, familial thoracic 4	132900
137	rs7501873	17	73505172	17:73505172:A:G	G	A	CASKIN2	KIAA0195,CASKIN2,TSEN54,LLGL2
