# Supplementary material for: Multi-ancestry GWAS of the electrocardiographic PR interval identifies 202 loci underlying cardiac conduction
Source: Nat Commun. 2020 May 21;11:2542. doi: 10.1038/s41467-020-15706-x (PMC7242331; doi:10.1038/s41467-020-15706-x)
Supplement: Supplementary file 22 — Supplementary Data 19 [file 41467_2020_15706_MOESM22_ESM.xlsx]

## Sheet: SD19 gene literature review
Supplementary Data 19 Literature review of nearest genes to the lead variants or biologically plausible genes in the region defined by an r2>0.5 from the lead variant or genes indicated by bioinformatics analyses.
* These loci reached genome-wide significance in the European ancestry meta-analysis and were borderline genome-wide significant in the multi-ancestry meta-analysis (P<5.4×10-7).
	Lead variant information												Nearest gene								Other biologically plausible gene in the locus								Other biologically plausible gene in the locus								Other biologically plausible gene in the locus								Other biologically plausible gene in the locus
Locus ID	Nearest gene	MarkerName	Chr	Position (build 37)	rsID	Minor allele frequency (MAF) category [common: MAF>5%, low frequency: MAF 1-5%, rare: MAF<1%)	Consequence	Nonsynonymous proxy variant information (r2>0.8) [MarkerName, consesuence, gene]	Genes at locus (r2>0.5 of lead or conditionally independent variants(s))	Gene(s) indicated from gene expression analyses (eQTLs and S-PrediXcan) in right atrial appendage and left ventricle tissues from GTex	Left ventricle best HiC locus interactor (RegulomeDB score≤2)	DEPICT prioritized gene(s) at FDR≤1%	Gene symbol - full name	Gene summary	Protein expression in cardiovascular tissues	Gene expression in cardiovascular tissues	Literature review	Animal model with CV phenotype	Association with Mendelian disease with a cardiovascular phenotype	References (PMID)	Gene symbol - full name	Gene summary	Protein expression is cardiovascular tissues	Gene expression in cardiovascular tissues	Literature review	Animal model with CV phenotype	Association with Mendelian disease with cardiovascular phenotype	References (PMID)	Gene symbol - full name	Gene summary	Protein expression is cardiovascular tissues	Gene expression in cardiovascular tissues	Literature review	Animal model with CV phenotype	Association with Mendelian disease with cardiovascular phenotype	References (PMID)	Gene symbol - full name	Gene summary	Protein expression is cardiovascular tissues	Gene expression in cardiovascular tissues	Literature review	Animal model with CV phenotype	Association with Mendelian disease with cardiovascular phenotype	References (PMID)	Gene symbol - full name	Gene summary	Protein expression is cardiovascular tissues	Gene expression in cardiovascular tissues	Literature review
1	HSPG2	1:22282619:C:T	1	22282619	rs7529220	common	regulatory_region_variant		HSPG2			HSPG2	HSPG2 - Perlecan/Heparan Sulfate Proteoglycan 2	Extracellular matrix component (a heparan sulphate proteoglycan) that interacts with other ECM proteins such as laminin, prolargin and collagen IV, it has a role in the development of fibrosis (one mechanism for atrioventricular block).	Yes	Yes		Mouse model of its corresponding Mendelian loss of function disease (Scwartz-Jampel Syndrome) has been developed but no CV phenotype investigated.	No	27613501, 29475023, 19367640
2	AIM1L	1:26679041:C:T	1	26679041	rs12031946	common	intron_variant		CNKSR1,RP11-231P20.2,LOC101928303,CEP85,SH3BGRL3,UBXN11,CD52,AIM1L,ZNF683			ZNF683	AIM1L - Absent in melanoma/Crystallin Beta-Gamma Domain Containing 2, also known as CRYBG2	Absent in melanoma 1-like/Crystallin Beta-Gamma Domain Containing 2. Unknown function. Paralog CRYBG2 is an anchoring protein for the subcellular component of Protein Kinase A.	No	No		No	No	25097019	SH3BGR - SH3 Domain Binding Glutamate Rich Protein	Small protein that regulates localisation of Enah for sarcomere formation, required for heart development.	Yes	Yes		No	No	26116879
3	MAP7D1	1:36620801:C:G	1	36620801	rs1475267	common	upstream_gene_variant		MAP7D1,RN7SL131P		SNIP1	MAP7D1	MAP7D1 - Microtubule Associated Protein 7 Domain-Containing Protein 1	No literature on MAP7D1 however, the paralog MAP7 is required for nuclear positioning in myofibers and muscle function. It is involved in regulating microtubule-mediated intracellular transport.	Yes	Yes		No	No	22425998, 23394833	SNIP1 - Smad Nuclear Interacting Protein 1	Protein that contains a coiled-coil motif and C-terminal forkhead-associated (FHA) domain. The encoded protein functions as a transcriptional coactivator that increases c-Myc activity and inhibits transforming growth factor beta (TGF-beta) and nuclear factor kappa-B (NF-kB) signalling. The encoded protein also regulates the stability of cyclin D1 mRNA, and may play a role in cell proliferation an…	Yes	Yes		No	No	22279524
4	EDN2	1:41955714:A:G	1	41955714	rs12751675	common	intergenic_variant		EDN2	EDN2			EDN2 - Endothelin 2	Endothelium-derived vasoconstrictor peptide. Expressed by some mouse cardiomyocytes and shown to be present in the human heart. More importantly the receptor is expressed in the heart. However KO mouse that lack the receptor have a normal electrophysiological phenotype.	No	No	2007, A985G polymorphism of EDN2 associated in with atrial fibrillation in hypertrophic cardiomyopathy patients - Circ J. 2007; 71(12):1932-36	No - Mice with double knockout for the EDN2 receptor had ECG measurements similar to WT. The statistics are not significant for PR: wt 108.6±19.25ms, n=6, DKO 96.7±13.24ms n = 5. Dev Biol 2014;393(2):245-254. IMPC - Lethal Homozygous KO.	No	25604013 - EDN2 marker mouse, 8323558 - human EDN2 mRNA expression. 25050930 - Mouse Endothelin receptor knockout mice. 18037749 - EDN2 polymorphism in HCM patients with AF.
5	SSBP3	1:54741767:C:T	1	54741767	rs603901	common	intron_variant		SSBP3	SSBP3, MRPL37		SSBP3	SSBP3 - Single Stranded DNA binding Protein 3	Sequence Specific DNA Binding Protein.	No	Yes (low)	Significant data associated with cell growth/cancer/stem cell maintenance. SSBP2 variants associated with glioblastoma survival. (Clin Cancer Res 2012;18(11)3154-62.) SSBP2 is required to maintain HSCs and stress response. (J Immunol 2014; 193(9) 4654-62). In vivo tumour suppression (Oncogene 2010;29(21):3044-54)	No	No	12079286 SSBP family identified. 83% homology to SSBP2. Genomics 2002; 80(1): 78-85. 22472174 SSBP2 Variants Glioblastoma survival. 25238756 - SSBP2 Required for HSC Maintenance. 20348955 - In vivo tumour suppression.	MRPL37 - Mitochondrial Large Ribosomal Subunit Protein ML37	39s ribosomal protein found in the mitochondria	Yes	Yes		No
6	NFIA	1:61895257:A:C	1	61895257	rs6587924	common	intron_variant		NFIA			NFIA	NFIA - Nuclear Factor 1 A-type	CCAAT-binding transcription factor that can initiate transcription in vertebrate and viral genes	Yes	Yes		No	No
7	CDC7	1:91966445:A:G	1	91966445	rs13447455	common	upstream_gene_variant		CDC7,RP11-47K11.2		TGFBR3		CDC7 - Cell division cycle 7-related protein kinase	Kinase activated by ASK protein whose expression fluctuates during the cell cycle. CDC7 is required throughout the S phase of mitosis. CDC7 activates replication origins.	No	No	Mouse ES cell KO leads to cell cycle arrest and p53 dependent apoptosis.	IMPC - Embryonic lethal homozygous KO. Hets have increased lymphocytes, decreased eosinophils and abnormal skin morphology.	No	9472017, 9472018, 11980714.	TGFBR3 - Transforming growth factor beta receptor 3	This locus encodes the transforming growth factor (TGF)-beta type III receptor. The encoded receptor is a membrane proteoglycan that often functions as a co-receptor with other TGF-beta receptor superfamily members. Ectodomain shedding produces soluble TGFBR3, which may inhibit TGFB signalling. Decreased expression of this receptor has been observed in various cancers. Alternatively spliced trans…	Yes	Yes		Gene expression appears to be regulator of cardiac fibrosis.	No	25884615
8	GJA5	1:147281349:C:T	1	147281349	rs1692144	common	intergenic_variant		RP11-314N2.2, GJA5 NBPF13P, PRKAB2, RP11-337C18.8, FMO5, RP11-337C18.10, CHD1L, RP11-337C18.4		PDE4DIP	GJA5	GJA5 - Gap Junction Protein Alpha 5	This gene is a member of the connexin gene family. The encoded protein is a component of gap junctions, which are composed of arrays of intercellular channels that provide a route for the diffusion of low molecular weight materials from cell to cell. Mutations in this gene may be associated with atrial fibrillation. Alternatively spliced transcript variants encoding the same isoform have been des…	Yes	Yes	Novel germline GJA5/connexin40 mutations associated with lone atrial fibrillation impair gap junctional intercellular communication.	KO Cx40 Mice indicated that Cx40 decreases conduction velocity in the atrial myocardium and can increase inducible arrhythmias susceptibility.	Atrial Fibrillation	23348765 24626989	PDE4DIP - Phosphodiesterase 4D Interacting Protein	Sequesters components of the cAMP-dependent pathway to Golgi or centrosomes.	Yes	Yes		No	No
9	DPT	1:168692137:C:G	1	168692137	rs531706	common	intron_variant		DPT			DPT	DPT - Dermatopontin	A widely distributed small molecular weight protein in the ECM. Can be found in the cytoplasm of cultured fibroblasts.	Yes	Yes	DPT Expression is raised in the infarct zone during rat MI. (Basic Res Cardiol 2002 97(6)461-468). Hypoxia increases DPT expression and secretion in CMs and CFs. DPT promotes adhesion, spreading and migration of CFs. (Matrix Biol 2013;32(1)23-31)	No	No	12395208 23262218
10	PRRX1	1:170615660:C:G	1	170615660	rs61824886	common	non_coding_transcript_exon_variant		RP11-545I10.2,RP1-79C4.1,PRRX1		METTL11B	PRRX1	PRRX1 - Paired-Related Homeobox Protein 1	The DNA-associated protein encoded by this gene is a member of the paired family of homeobox proteins localized to the nucleus. The protein functions as a transcription co-activator, enhancing the DNA-binding activity of serum response factor, a protein required for the induction of genes by growth and differentiation factors. The protein regulates muscle creatine kinase, indicating a role in the…	No	No		Loss of function in PRX1 alters elastic structure of arteries and ductus arteriosus.	No	7758948 12244557 10664157	METTL11B/NTMT1 - Methyltransferase Like 11B	METTL11B (Methyltransferase Like 11B) is a Protein Coding gene. Gene Ontology (GO) annotations related to this gene include methyltransferase activity and N-terminal protein N-methyltransferase activity. An important paralog of this gene is NTMT1.	Yes	Yes		IMPC mice planned, JAX - abnormal blood vessel morphology. http://www.informatics.jax.org/diseasePortal/popup?isPhenotype=true&markerID=MGI:1913867&header=cardiovascular%20system	No
11	C1orf98	1:200271408:C:T	1	200271408	rs819636	common	regulatory_region_variant		C1orf98, RP11-532L16.3				C1orf98	Long intergenic non-protein coding RNA.	No	No		No	No	N/A
12	HLX	1:221138612:C:T	1	221138612	rs6678632	common	intergenic_variant		HLX		C1orf140	HLX	HLX - H2.0 Like Homeobox	HLX is a Protein Coding gene. Diseases associated with HLX include Ovarian Endodermal Sinus Tumour and Ovarian Primitive Germ Cell Tumour. Among its related pathways are IL12-mediated signalling events. GO annotations related to this gene include sequence-specific DNA binding. An important paralog of this gene is DBX1.	Yes	Yes		No	No		C1orf140	Uncharacterised gene
13	ADCK3	1:227173477:C:G	1	227173477	rs3768419	common	intron_variant	1:227174210:C:T; synonymous_variant; ADCK3	ADCK3,CDC42BPA		CDC42BPA	CDC42BPA	ADCK3 - Atypical Kinase COQ8A	Mitochondrially targeted protein. Regulatory role in Coenzyme Q10 biosynthesis.	Yes	Yes		No	No	18319074 - ADCK3 is mutated in recessive ataxia due to CoQ10 deficiency.	CDC42BPKA - Binding Protein Kinase Alpha	A downstream effector of CDC42 (cell cycle regulator) Serine/Threonine-protein kinase MRCK Alpha. Regulating cytoskeleton reorganization and cell migration.	Yes	Yes	CDC42BPA transfection in HeLa cells leads to actin/myosin reorganization, kinase dead mutants block formation of focal complexes and peripheral microspikes (Mol Cell Biol 199 18(1):130-140). Involved in neurite outgrowth in PC12 cells (J Biol Chem 1999; 274(28):19901-5)	No	No	9418891 - CDC42BPA effect in HeLa cells when transfected. 10391936 - Involvement in regulating neurite outgrowth.
14	SIPA1L2	1:232712145:A:G	1	232712145	rs1285678	common	intron_variant		SIPA1L2			SIPA1L2	SIPA1L2 - Signal Induced Proliferation Associated 1 Like 2	Encodes a member of the signal-induced proliferation-associated 1 like family. Members of this family contain a GTPase activating domain, a PDZ domain and a C-terminal coiled-coil domain with a leucine zipper. A similar protein in rat acts as a GTPases for the small GTPase Rap.	Yes	Yes		No	No
15	RYR2	1:237194922:A:G	1	237194922	rs10802580	common	regulatory_region_variant		RYR2			RYR2	RYR2 - ryanodine receptor 2	The cardiac ryanodine receptor is responsible for calcium release from the sarcoplasmic reticulum during excitation contraction coupling in cardiac muscle. It is an ion channel and is opened by the influx of calcium via L-type calcium channels (calcium-induced calcium release). Mutations in the channel cause CPVT and ARVC. Ryr2 is also be important in determining a “calcium clock” in the SA node …	Yes	Yes		No significant phenotype in a KO mouse (IMPC). Ryr2 -/- mice, which died at approximately embryonic day 10 with morphologic abnormalities in the heart tube. Prior to embryonic death, large vacuolate sarcoplasmic reticula and structurally abnormal mitochondria began to develop in the mutant cardiac myocytes, and the vacuolate sarcoplasmic reticula appeared to contain high concentrations of Ca(2+).…	Arrhythmogenic right ventricular dysplasia 2 and ventricular tachycardia, catecholaminergic polymorphic, 1	17875969, 17984046
16	SMYD3	1:246157144:A:G	1	246157144	rs28468565	common	intron_variant		SMYD3		KIF26B		SMYD3 - SET And MYND Domain Containing 3	It is a histone methyltransferase. Specifically methylates 'Lys-4' of histone H3, inducing di- and tri-methylation, but not monomethylation. Also methylates 'Lys-5' of histone H4 . Plays an important role in transcriptional activation as a member of an RNA polymerase complex II. Binds DNA containing 5'-CCCTCC-3' or 5'-GAGGGG-3' sequences.	Yes	Yes		No	No	15235609, 22419068	KIF26B - Kinesin Family Member 26B	Kinesin Family Member 26B is an intracellular motor protein thought to transport organelles along microtubules. The encoded protein is required for kidney development. Elevated levels of this protein have been found in some breast and colorectal cancers. Interacts with MYH10 which controls cardiomyocyte nucleation and cytokinesis.	Yes	No		No	No
17	LINC01249	2:4824622:A:G	2	4824622	rs12616546	common	intergenic_variant		SNORA31, LINC01249				SNORA31 - Small Nucleolar RNA, H/ACA Box 31	It is an RNA Gene, and is affiliated with the snoRNA class. Widely expressed in eukaryotes, the site-specific formation of the two prevalent types of rRNA modified nucleotides, 2'-O-methylated nucleotides and pseudouridines, is directed by two large families of snoRNAs. These are termed box C/D and H/ACA snoRNAs, respectively, and exert their function through the formation of a canonical guide RN…	Yes	Yes		No	No	12457565
18	STRN	2:37102249:A:G	2	37102249	rs17496249	common	intron_variant		STRN,HEATR5B	STRN	HEATR5B		STRN - Striatin	Diseases associated with STRN include Cherubism. Among its related pathways are Neurophysiological process Glutamate regulation of Dopamine D1A receptor signaling and Plasma membrane estrogen receptor signaling. GO annotations related to this gene include protein complex binding and estrogen receptor binding.	Yes	Yes		Increased systemic arterial blood pressure. Using a genome wide association study followed by fine mapping, PCR, and sequencing, it was shown that familial ARVC in boxer dogs was due to a heterozygous 8-bp deletion in the 3-prime UTR of the canine striatin gene on chromosome 17. The deletion was predicted to alter a stem-loop structure and was associated with reduced cardiac striatin mRNA and pro…	No	20596727	HEATR5B - HEAT Repeat Containing 5B	HEATR5B (HEAT Repeat Containing 5B) is a Protein Coding gene. GO annotations related to this gene include binding. An important paralog of this gene is HEATR5A	Yes	Yes		No	No
19	EML4	2:42537995:A:C	2	42537995	rs6728830	low frequency	intron_variant		EML4			EML4	EML4 - Echinoderm Microtubule Associated Protein Like 4	This gene is a member of the echinoderm microtubule associated protein-like family. The encoded WD-repeat protein may be involved in microtubule formation. May modify the assembly dynamics of microtubules, such that microtubules are slightly longer, but more dynamic. Abnormal fusion of parts of this gene with portions of the anaplastic lymphoma receptor tyrosine kinase gene, which generates EML4-…	Yes	Yes		No	No
20	EPAS1	2:46533376:C:T	2	46533376	rs11894252	common	intron_variant		EPAS1			EPAS1	EPAS1 - Endothelial PAS domain-containing protein 1	This gene encodes a transcription factor involved in the induction of genes regulated by oxygen, which is induced as oxygen levels fall. The encoded protein contains a basic-helix-loop-helix domain protein dimerization domain as well as a domain found in proteins in signal transduction pathways which respond to oxygen levels. Activating mutations in this gene are associated with erythrocytosis fa…	Yes	Yes		EPAS1 KO mouse is lethal due to preweaning mortality. Homozygotes at E12.5 are severely dysmorphic with abnormal heart and blood vessel morphology. Expressed mainly in endothelial cells. Mice that lack the hypoxia-inducible transcription factor EPAS1 die at mid-gestation. Despite normal morphological development of the circulatory system, EPAS1-deficient mice display pronounced bradycardia. In ad…		9808618	TMEM247 - Transmembrane protein 247	Protein coding gene, no assigned function.
21	FBXO11	2:48150587:C:T	2	48150587	rs7588761	common	intergenic_variant		MSH6,FBXO11,AC079807.1,AC079807.4			FBXO11	FBXO11 - F-box protein 11	This gene encodes a member of the F-box protein family which is characterized by an approximately 40 amino acid motif, the F-box. The F-box proteins constitute one of the four subunits of ubiquitin protein ligase complex called SCFs (SKP1-cullin-F-box), which function in phosphorylation-dependent ubiquitination. The F-box proteins are divided into 3 classes: Fbws containing WD-40 domains, Fbls co…	Yes	Yes		No	No
22	SPTBN1	2:54824815:A:G	2	54824815	rs4519566	common	intron_variant		SPTBN1,EML6		SPTBN1	SPTBN1, AC093110.1	SPTBN1/ELF1 - Spectrin Beta, Non-Erythrocytic 1	Spectrin is an actin crosslinking and molecular scaffold protein that links the plasma membrane to the actin cytoskeleton, and functions in the determination of cell shape, arrangement of transmembrane proteins, and organization of organelles. It is composed of two antiparallel dimers of alpha- and beta- subunits.	Yes	Yes		SPTBN1 -/- mice exhibit a phenotype similar to Smad2/Smad3 double heterozygous mice, with midgestational death due to gastrointestinal, liver, neural, and heart defects.	No
23	LINC01812; C1D	2:68079211:A:G	2	68079211	rs7584373	common	intergenic_variant		LINC01812, C1D				C1D - Nuclear DNA-Binding Protein	The protein encoded by this gene is a DNA binding and apoptosis-inducing protein and is localized in the nucleus. May act as transcriptional corepressor in addition to processing rRNA- It is also a Rac3-interacting protein which acts as a corepressor for the thyroid hormone receptor. This protein is thought to regulate TRAX/Translin complex formation. Plays a role in the recruitment of the RNA ex…	Yes	Yes		No	No
24	FHL2	2:106104856:C:T	2	106104856	rs13006682	common	intergenic_variant		FHL2			FHL2	FHL2 - Four and a half LIM domains protein 2	This is a transcription factor which may be activated by a number of different signalling pathways (e.g. growth factor receptor signalling, TGFbeta, wnt\beta catenin etc. Likely acts as protein-protein interaction hub).	Yes	Yes	Known to interact with HERG and is involved in cardiac hypertrophy. Associated with rhabdomyosarcoma may modify HOCM.	Modifies hypertrophic response to β-adrenergic stimulation	No	11390345
25	NCKAP5	2:134326085:A:C	2	134326085	rs17816356	common	upstream_gene_variant		NCKAP5		LYPD1	MGAT5	NCKAP5 - NCK Associated Protein 5	Peripheral clock protein.	Yes	Yes		No	No		LYPD1 - LY6/PLAUR Domain Containing 1	The LYPD1 protein is involved in the Metabolism of proteins and Post-translational modification- synthesis of GPI-anchored proteins.	No	No		No	No
26	TEX41	2:145453968:A:G	2	145453968	rs76909456	common	intron_variant,non_coding_transcript_variant		TEX41,AC023128.1				TEX41 - testis expressed 41	Long intergenic non-protein coding RNA.	No	No		No	No
27	LINC01473; ZC3H15	2:187033804:A:G	2	187033804	rs138711926	low frequency	intergenic_variant		LOC101927196,FSIP2,RPL21P32,RP11-410E4.1,MED28P3,ZC3H15,ITGAV,FAM171B,AC007319.1			ITGAV	ITGAV - Integrin Alpha V	Integrin Alpha-V, one of the major receptors responsible for binding to the extracellular matrix, involved in cell cytoskeletal organisation, proliferation and survival.	Yes	Yes		Knockout in mice is lethal due to vascular and developmental defects.	No	17895374
28	AC098617.1	2:192723128:A:T	2	192723128	rs58577564	common	intron_variant,non_coding_transcript_variant		SDPR,AC098617.1			SDPR	SDPR - Serum Deprivation response	SPDR: This protein is a substrate for protein kinase C (PKC) phosphorylation and recruits polymerase I and transcript release factor (PTRF) to caveolae	Yes	Yes	GWAS: associated with mean platelet volume and count	Spdr: MGI:99513; CV phenotype noted, abnormal vasculature of lung and endothelial structures.	No	27863252
29	BMPR2*	2:203373030:A:G	2	203373030	rs2103208	common	intron_variant		AC064836.3,RN7SL40P,BMPR2		NBEAL1		BMPR2 - bone morphogenetic protein receptor type 2	BMPR2: bone morphogenetic protein receptor type 2, Mutations in this gene have been associated with primary pulmonary hypertension, both familial and fenfluramine-associated, and with pulmonary venoocclusive disease. On ligand binding, forms a receptor complex consisting of two type II and two type I transmembrane serine/threonine kinases	Yes	Yes	BMPR2: Associated with urate levels and intelligence	BMPR2: widespread CV phenotypes when knocked out. (MGI:1095407)	BMPR2: Pulmonary hypertension, familial primary, 1, with or without HHT; Pulmonary hypertension, primary, fenfluramine or dexfenfluramine-associated; Pulmonary venoocclusive disease 1	2309889; 26076038; 25688877; 23263486; 29326435	FAM117B - Family with sequence similarity 117 member B	No functional data on this gene product.	No	Yes	FAM117B: GWAS: Assoc with serum cholesterol, sarcoidosis	No	No	FAM117B: 26051272, 25961943, 24097068, 28334899
30	AC007563.5*	2:217628087:C:T	2	217628087	rs6435953	common	intron_variant,non_coding_transcript_variant		AC007563.5,AC007563.3		IGFBP5		IGFBP5 - Insulin-like Growth Factor- Binding Protein 5	Insulin-like Growth Factor-binding Protein 5. Expression leads to inhibition of growth in breast cancer cell lines.	No	No		No	No
31	TMEM198	2:220414019:C:T	2	220414019	rs13023533	common	synonymous_variant	2:220416942:C:G; splice_region_variant,intron_variant; OBSL1	ASIC4,CHPF,TMEM198,OBSL1			OBSL1, DES, SPEG, CHPF	SPEG - Striated Muscle Preferentially Expressed Protein Kinase	SPEG: SPEG complex locus. This gene encodes a protein with similarity to members of the myosin light chain kinase family. This protein family is required for myocyte cytoskeletal development.	Yes	Yes	SPEG: GWAS Assoc with resting heart rate	Speg: MGI:109282, CV phenotype, abnormal dilated heart	SPEG: centronuclear myopathy-5	19481195, 25087613, 27798624, 27729468	ASIC4 - Acid sensing ion channel subunit family member 4	This gene belongs to the superfamily of acid-sensing ion channels, which are proton-gated, amiloride-sensitive sodium channels. These channels have been implicated in synaptic transmission, pain perception as well as mechanoperception.	No	No				19481195, 25087613, 27798624, 27729468	OBSL1 - Obscurin like 1.	This gene encodes a cytoskeletal adaptor protein, which is a member of the Unc-89/obscurin family. The protein contains multiple N- and C-terminal immunoglobulin (Ig)-like domains and a central fibronectin type 3 domain.	Yes	Yes		No	No	19481195, 17289344	DES	Desmin. Muscle-specific intermediate filament, connects myofibrils and the plasma membrane.	Yes	Yes	Cardiomyopathy, dilated, 1I	Knockout leads to abnormal intercalated discs. Cardiomyocytes have mislocalized lyososomes.	Myofibrillar Myopathy and Dilated Cardiomyopathy	17872945; 10430757; 20423733
32	LSM3	3:14275759:C:G	3	14275759	rs6442433	common	intergenic_variant		LSM3	SLC6A6	GRIP2		LSM3 - LSM3 Homolog, U6 Small Nuclear RNA And MRNA Degradation Associated	Among its related pathways are mRNA Splicing, major Pathway and De-adenylation-dependent mRNA decay.	No	No		No	No		GRIP2 - Glutamate receptor interacting protein 2	May play a role as a localized scaffold for the assembly of a multiprotein signaling complex and as mediator of the trafficking of its binding partners at specific subcellular location in neurons.	No	Yes		No	No
33	THRB	3:24465080:C:T	3	24465080	rs60325252	common	intron_variant		THRB	THRB			THRB - Thyroid Hormone Receptor Beta	The protein encoded by this gene is a nuclear hormone receptor for triiodothyronine. It is one of the several receptors for thyroid hormone, and has been shown to mediate the biological activities of thyroid hormone.	No	Yes		No	No
34	TRAK1	3:42103045:G:T	3	42103045	rs11921457	common	intron_variant		ULK4,TRAK1	TRAK1		TRAK1	TRAK1 - trafficking kinesin protein 1	TRAK1: trafficking kinesin protein 1.	Yes	Yes	GWAS: associated with neurofibrillary tangles, visceral versus subQ adipose tissue ratio	No	No	25188341, 22589738
35	LAMB2	3:49166069:C:T	3	49166069	rs9865051	common	intron_variant		NCKIPSD,IP6K2,PRKAR2A,SLC25A20,ARIH2,P4HTM,WDR6,IMPDH2,QRICH1,LAMB2,RP11-694I15.7,KLHDC8B,C3orf84,CCDC36,C3orf62,USP4,GPX1,RHOA,TCTA,NICN1,RNA5SP130,DAG1,BSN-AS2,BSN	AMT, QRICH1	ZNF589;CCDC51	LAMB2, DAG1, KLHDC8B, PRKAR2A	LAMB2 - laminin, beta subunit 2	LAMB2: laminin, beta subunit 2. Laminins, a family of extracellular matrix glycoproteins, are the major noncollagenous constituent of basement membranes. The beta 2 chain contains the 7 structural domains typical of beta chains of laminin, including the short alpha region. However, unlike beta 1 chain, beta 2 has a more restricted tissue distribution. It is enriched in the basement membrane of mu…	Yes	Yes	GWAS: blood protein levels, Crohn’s disease, ulcerative colitis, macrophage inflammatory protein 1b levels, resting heart rate, coronary artery disease LAMB2: locus associated with breast cancer	LAMB2: no CV phenotype noted (MGI:99916)	No	28692176, 8188235, 10873393, 11592811, 28240269, 28067908, 27989323, 27798624, 29212778 LAMB2: 29059683	SLC25A20 - Solute carrier family 25 member 20	This gene product is one of several closely related mitochondrial-membrane carrier proteins that shuttle substrates between cytosol and the intramitochondrial matrix space. This protein mediates the transport of acylcarnitines into mitochondrial matrix for their oxidation by the mitochondrial fatty acid-oxidation pathway. Mutations in this gene are associated with carnitine-acylcarnitine transloc…	Yes	Yes	GWAS: blood protein levels, Crohn’s disease, ulcerative colitis, macrophage inflammatory protein 1b levels, resting heart rate, coronary artery disease	SLC25A20: CV phenotype noted, main vein stenosis, also malformations of cerebral vasculature (MGI:1928738)	No	28692176, 8188235, 10873393, 11592811, 28240269, 28067908, 27989323, 27798624, 29212778 SLC25A20: none	QRICH1 - Glutamine rich 1.	Related to tyrosine recombinase element. Predicted to bind DNA or proteins.	Yes	Yes		Qrich1: MGI:1916482 CV phenotype of abnormal myocardium compaction, double outlets on right ventricle, ventricular septal defect	No.	28692176, 8188235, 10873393, 11592811, 28240269, 28067908, 27989323, 27798624, 29212778
36	ADCY5	3:123117165:C:T	3	123117165	rs1000368	common	intron_variant		ADCY5	ADCY5		ADCY5	ADCY5 - adenylate cyclase 5	ADCY5: adenylate cyclase 5. This gene encodes a member of the membrane-bound adenylyl cyclase enzymes. Adenylyl cyclases mediate G protein-coupled receptor signaling through the synthesis of the second messenger cAMP. Activity of the encoded protein is stimulated by the Gs alpha subunit of G protein-coupled receptors and is inhibited by protein kinase A, calcium and Gi alpha subunits.	Yes	Yes	GWAS: BMI, T2D, disease progression in AMD, fasting blood glucose, chronic kidney disease, obesity, PCB levels, maternal gestational age, monocyte count, lymphocyte count, glycated haemoglobin, birth weight, 2 hour glucose challenge	No	No	11310626, 22782511, 24700542,
37	TSC22D2	3:150176904:D:I	3	150176904	rs201481721	low frequency	3_prime_UTR_variant		TSC22D2			TSC22D2	TSC22D2 - TSC22 Domain Family Member 2	TSC22D2 belongs to a protein family characterized by a TSC box and an adjacent leucine zipper domain and is predicted to interact in the cell cycle.	No	Yes		No	No
38	RAP2B	3:153000092:C:T	3	153000092	rs4680046	common	intergenic_variant		RAP2B			RAP2B	RAP2B - RAS-related protein 2B	Involved in GTP binding, observed translocating to the cytoskeleton during platelet aggregation.	Yes	Yes	Involved in key intracellular signal transduction to relay extracellular matrix stiffness.	No	No	30135582
39	MLF1*	3:158333891:A:G	3	158333891	rs6799180	common	intergenic_variant		MLF1,MTAPP1,RP11-79M21.3,GFM1,LXN,RARRES1	MLF1, LXN	PQLC2L;MFSD1	MFSD1	MLF1 - myeloid leukemia factor 1	MLF1: myeloid leukaemia factor 1. This gene encodes an oncoprotein which is thought to play a role in the phenotypic determination of hemopoietic cells.	No	Yes	GWAS: assoc with sporadic neuroblastoma	No	No	28545128
40	FNDC3B	3:171800256:A:G	3	171800256	rs4894803	common	intron_variant		FNDC3B			FNDC3B	FNDC3B - Fibronectin type III domain containing 3B	FNDC3B: fibronectin type III domain containing 3B.	No	Yes	GWAS: assoc with intraocular pressure and height	No	No	29617998, 29235454, 25282103
41	FGF12	3:192373761:A:C	3	192373761	rs4687352	common	intron_variant		FGF12			FGF12	FGF12 - Fibroblast Growth Factor 12	The protein encoded by this gene is a member of the fibroblast growth factor (FGF) family. FGF family members possess broad mitogenic and cell survival activities, and are involved in a variety of biological processes, including embryonic development, cell growth, morphogenesis, tissue repair, tumour growth, and invasion. This growth factor lacks the N-terminal signal sequence present in most of …	No	Yes	SCN5A variant that blocks fibroblast growth factor homologous factor regulation causes human arrhythmia.	No	No	26392562
42	DLG1	3:196799232:D:I	3	196799232	rs143879787	common	intron_variant		DLG1			DLG1	DLG1 - Discs large MAGUK scaffold protein	DLG1: Drosophila homologue of discs large, multi-domain scaffolding protein that is required for normal development. Regulates the excitability of cardiac myocytes by modulating the functional expression of Kv4 channels. Functional regulator of Kv1.5 channel.	Yes	Yes	GWAS: assoc with nonsyndromic cleft lip with cleft palate, and urinary tract infection frequency	No	No	28232668, 28928442
43	SRD5A3	4:56123105:A:G	4	56123105	rs77422711	low frequency	intergenic_variant		SRD5A3,TMEM165,PDCL2,NMU			CLOCK	SRD5A3 - Steroid 5-Alpha Reductase 2-like 1	SRD5A3: Steroid 5-Alpha Reductase 2-like 1, required to convert polyprenol into dolichol.	Yes	Yes	Abnormal heart morphology and embryonic growth.	Knockout mutants show dilated hearts and open neural tubes.	No	20637498
44	LPHN3	4:62409801:C:G	4	62409801	rs28540500	common	intron_variant		LPHN3			LPHN3	LPHN3 - Adhesion G protein-coupled receptor L3	LPHN3: latrophilin, aka ADGRL3, adhesion G protein coupled receptor L3	Yes	Yes	GWAS: response to antipsychotic treatment in schizophrenia, partial epilepsies	Lphn3: MGI:2441950, CV phenotype of abnormal heart morphology or enlarged heart noted.	No	21107309, 20522523
45	FGF5	4:81202048:G:T	4	81202048	rs36034102	common	intron_variant		FGF5			FGF5	FGF5 - Fibroblast Growth Factor 5	This gene was identified as an oncogene, which confers transforming potential when transfected into mammalian cells. Among its related pathways are RET signaling and Activation of cAMP-Dependent PKA. GO annotations related to this gene include growth factor activity and fibroblast growth factor receptor binding. An important paralog of this gene is FGF6. The protein encoded by this gene is a memb…	No	Yes		No	No
46	PDLIM5	4:95506214:A:G	4	95506214	rs2172448	common	intron_variant		PDLIM5			PDLIM5	PDLIM5 - PDZ and LIM domain 5	PDLIM5: PDZ and LIM domain 5. This gene encodes a member of a family of proteins that possess a 100-amino acid PDZ domain at the N terminus and one to three LIM domains at the C-terminus. This family member functions as a scaffold protein that tethers protein kinases to the Z-disk in striated muscles. It is thought to function in cardiomyocyte expansion and in restraining postsynaptic growth of e…	Yes	Yes	GWAS: prostate cancer, mean platelet volume, coronary artery disease, asparaginase induced acute pancreatitis in acute lymphoblastic leukaemia.	Pdlim5: MGI:1927489 CV phenotype noted, DCM, abnormal heart morphology, abnormal BP, decreased LVeF	No	27114598, 29212778, 27863252, 19767753
47	MYOZ2*	4:120070079:A:T	4	120070079	rs78277783	common	intron_variant		MYOZ2,RP11-455G16.1,USP53	MYOZ2		MYOZ2	MYOZ2 - Myozenin 2	MYOZ2: Myozenin 2. Tethers calcineurin to alpha-actinin at the z-line of the sarcomere in skeletal and cardiac muscle cells.	Yes	Yes		Myoz1: MGI:1913063 has CV phenotype: enlarged heart, cardiac hypertrophy, cardiomyopathy	Cardiomyopathy hypertrophic	14993199, 22987565, 28296734
48	SLC12A7	5:1054197:C:T	5	1054197	rs4975572	common	intron_variant		NKD2,SLC12A7			SLC12A7	SLC12A7 - solute carrier family 12 member 7	SLC12A7: solute carrier family 12 member 7, aka KCC4, potassium chloride ion co-transporter	Yes	Yes	GWAS: red cell distribution width, mean corpuscular volume, RBC count, WBC count, granulocyte count, lung cancer, lung adenocarcinoma.	No	No	20139978, 27863252, 28017375, 28604730	NKD2 - Naked cuticle homolog 2	Naked Cuticle, Homolog of 2. Negative regulator fo Wnt-beta-catenin pathway.	No	No		No	No
49	SUB1	5:32629419:A:G	5	32629419	rs17441816	common	intergenic_variant		SUB1, NPR3		SLC45A2	NPR3	NPR3 - naturetic peptide receptor 3	NPR3: naturetic peptide receptor 3. Binding with similar affinities atrial natriuretic peptide NPPA/ANP, brain natriuretic peptide NPPB/BNP, and C-type natriuretic peptide NPPC/CNP. This gene assists in clearing excess naturetic peptide by binding the ligand and undergoing endocytosis. Mutations associated with hypertension, type 2 diabetes.	No	Yes	GWAS: height, systolic blood pressure, diastolic blood pressure, hypertension, pulse pressure, hip circumference adjusted for BMI, waist circumference adjusted for BMI, mean arterial pressure, ovarian reserve	Npr2: MGI:97373 CV phenotypes noted – hypovolemia and hypotension	No	25282103, 20881960, 23563607, 21909115, 28739976, 25673412, 21909110, 21572416, 28270201, 28448500, 24954895, 26390057, 19343178, 22116950, 28135244	SUB1 - SUB1 homolog, transcriptional regulator	SUB1 homolog. Transcriptional regulatory capable of binding DNA.	Yes	Yes		No	No
50	HCN1	5:45864843:A:G	5	45864843	rs10039283	common	intergenic_variant		HCN1,CTD-2013M15.1			HCN1	HCN1 - Hyperpolarization Activated Cyclic Nucleotide Gated Potassium Channel 1	The membrane protein encoded by this gene is a hyperpolarization-activated cation channel that contributes to the native pacemaker currents in heart and neurons. The encoded protein can homodimerize or heterodimerize with other pore-forming subunits to form a potassium channel. This channel may act as a receptor for sour tastes.	No	Yes		Hcn1 -/- mice appeared with the expected mendelian frequency and did not differ from their wildtype littermates in overall health and longevity. There was no difference in the anatomic properties of brains from wildtype and Hcn1 -/- mice, including hindbrain regions involved in motor control. Mutant mice showed no abnormalities in several functions dependent upon fast synaptic input to Purkinje n…	No	14651847, 27347074, 26681531
51	NR2F1	5:92455655:A:G	5	92455655	rs4869412	common	intergenic_variant		CTD-2091N23.1			NR2F1	NR2F1 - nuclear receptor subfamily 2 group F member 1	The protein encoded by this gene is a nuclear hormone receptor and transcriptional regulator. The encoded protein acts as a homodimer and binds to 5'-AGGTCA-3' repeats.	No	No		No		24462372
52	FER*	5:108210304:A:G	5	108210304	rs6889995	common	intron_variant		LINC01023,FER			FER	FER - FER tyrosine kinase	FER: FER tyrosine kinase. The protein encoded by this gene is a member of the FPS/FES family of non-transmembrane receptor tyrosine kinases. It regulates cell-cell adhesion and mediates signaling from the cell surface to the cytoskeleton via growth factor receptors.	Yes	Yes	GWAS: association with interocular pressure	No	No	29617998
53	STARD4	5:111046342:C:T	5	111046342	rs67968533	common	intron_variant,non_coding_transcript_variant		STARD4-AS1,NREP			NREP	NREP - Neuronal Regeneration Related Protein	Influences fibroblast plasticity, can induce change to myofibroblasts.	Yes	Yes		No	No	12417574
54	LOC101927421 - ZNF608	5:124343851:C:T	5	124343851	rs12654442	common	intergenic_variant		LOC101927421, ZNF608		ZNF608	ZNF608	ZNF608 - Zinc Finger Protein 608	Zinc finger proteins (ZNFs), such as ZNF208, bind DNA and, through this binding, regulate gene transcription.	Yes	Yes		Nervous system phenotype	No
55	SLC27A6	5:128299279:C:T	5	128299279	rs2577531	common	upstream_gene_variant		SLC27A6			SLC27A6	SLC27A6 - Solute carrier family 27 member 6	SLC27A6: solute carrier family 27 member 6. This gene encodes a member of the fatty acid transport protein family (FATP). FATPs are involved in the uptake of long-chain fatty acids and have unique expression patterns.	Yes	Yes		None	No
56	FGF18	5:170868622:C:T	5	170868622	rs78810186	common	intron_variant		FGF18			FGF18	FGF18 - Fibroblast Growth Factor 18	FGF family members possess broad mitogenic and cell survival activities, and are involved in a variety of biological processes, including embryonic development, cell growth, morphogenesis, tissue repair, tumour growth, and invasion. It has been shown in vitro that this protein is able to induce neurite outgrowth in PC12 cells.	Yes	Yes		No. Knockout studies of the similar gene in mice implied the role of this protein in regulating proliferation and differentiation of midline cerebellar structures.	No
57	LINC01411	5:173779209:A:T	5	173779209	rs4868384	common	intron_variant,non_coding_transcript_variant		LINC01411, MSX2	RP11-267A15.1	ATP6V0E1	MSX2	MSX2 - Msh homeobox 2	Msx homeobox 1. Muscle segment homeobox gene.	No	No		No	No
58	DSP	6:7527269:A:G	6	7527269	rs72825038	common	intergenic_variant		RP11-288G3.4,DSP			DSP	DSP - Desmoplakin	Gene which encodes Desmoplakin I. A junction protein in found in epithelial cells. DSP plays a vital role in stabilising gap junction connexin proteins as well as controlling the distribution of connexin43 and Nav1.5.	Yes	Yes		Desmoplakin mouse knockout showed that epidermal integrity requires desmoplakin. Mechanical stresses to DP-null skin cause intercellular separations. The number of epidermal desmosomes in DP-null skin was similar to wildtype, but they lacked keratin filaments, which compromise their function. DP-null keratinocytes have few desmosomes in vitro, and are unable to undergo actin reorganization and me…	Arrhythmogenic right ventricular dysplasia 8, OMIM 607450; Cardiomyopathy, dilated, with woolly hair and keratoderma, OMIM 605676; Dilated cardiomyopathy with woolly hair, keratoderma, and tooth agenesis,OMIM 615821; Epidermolysis bullosa, lethal acantholytic, OMIM 609638 Keratosis palmoplantaris striata II OMIM 612908;	11781569; 23877755
59	DEK	6:18227546:A:C	6	18227546	rs214502	common	intron_variant		KDM1B,DEK,Y_RNA,RNF144B	DEK	FAM8A1	DEK	DEK - DEK proto-oncogene	This gene encodes a protein with one SAP domain. This protein binds to cruciform and super helical DNA and induces positive supercoils into closed circular DNA, and is also involved in splice site selection during mRNA processing.	Yes	Yes	GWAS: assoc with cancer, thiopurine methyltransferase activity	No	No	27770449, 29299148	RNF144B - Ring finger protein 144B	Ring Finger protein 144B, predicted membrane protein.	Yes	No	No	No	No
60	HDGFL1	6:22570189:C:T	6	22570189	rs6922960	common	synonymous_variant		HDGFL1,RP1-309H15.2			HDGFL1	HDGFL1 - Hepatoma Derived Growth Factor-Like 1	Localised to the nucleus, thought to be involved in DNA repair signalling.	No	No		No	No
61	LRCC16A (or CARMIL1)	6:25351477:D:I	6	25351477	rs139915396	common	intron_variant		LRCC16A (or CARMIL1)			LRCC16A	Leucine-Rich Repeat-Containing Protein 16A (or CARMIL1, Capping Protein Regulator And Myosin 1 Linker 1)	Cell membrane-cytoskeleton-associated protein that plays a role in the regulation of actin polymerization at the barbed end of actin filaments. Prevents F-actin heterodimeric capping protein (CP) activity at the leading edges of migrating cells, and hence generates uncapped barbed ends and enhances actin polymerization, however, seems unable to nucleate filaments. Plays a role in lamellipodial pr…	Yes	Yes		No	N/A	16054028 19846667
62	CDKN1A	6:36645968:C:G	6	36645968	rs730506	common	upstream_gene_variant		Y_RNA,CDKN1A			CDKN1A	CDKN1A - Cyclin dependent kinase inhibitor 1A	Critical gene in controlling response to DNA damage and cell cycle gatekeeper.	No	Yes		No	No	13678583
63	TFEB	6:41658889:C:T	6	41658889	rs1015149	common	synonymous_variant		TFEB		KCNK5	TFEB	KCNK5 - Potassium Two Pore Domain Channel Subfamily K Member 5	Noninactivating, outwardly rectifying potassium channel. Constitutively active in T cells.	Low	Yes		Knockout mice have low blood pressure.	N/A	15141089	TFEB - Transcription factor EB	T- Cell Transcription Factor EB, binds to a regulatory region found in lysosomal genes. Positively regulates autophagy.	Yes	Yes	No	No	No
64	RCAN2	6:46452619:C:T	6	46452619	rs871728	common	intron_variant		RCAN2,LOC101926898,CYP39A1	RCAN2		RCAN2	RCAN2 - regulator of calcineurin 2	RCAN2: regulator of calcineurin 2. This gene encodes a member of the regulator of calcineurin (RCAN) protein family. These proteins play a role in many physiological processes by binding to the catalytic domain of calcineurin A, inhibiting calcineurin-mediated nuclear translocation of the transcription factor NFATC1.	Yes	Yes	GWAS assoc with neuroticism, BMI	No	None	25673413, 27089181
65	LOC101927686	6:113978255:C:T	6	113978255	rs111739590	common	upstream_gene_variant		LOC101927686			MARCKS	MARCKS - Protein Kinase C Substrate	Protein Kinase C Substrate, filamentous actin crosslinking protein. Associates with myosin and actin.	Yes	No		No	N/A	8420923, 1860846, 2241894
66	TCF21	6:134214525:C:G	6	134214525	rs12190287	common	3_prime_UTR_variant		MGC34034,TCF21			TCF21	TCF21 - transcription factor 21	TCF21: transcription factor 21. TCF21 encodes a transcription factor of the basic helix-loop-helix family. The TCF21 product is mesoderm specific, and expressed in embryonic epicardium, mesenchyme-derived tissues of lung, gut, gonad, and both mesenchymal and glomerular epithelial cells in the kidney.	Yes	No	GWAS assoc with coronary artery disease	Tcf21: MGI:1202715, abnormal heart morphology	No	24875298, 26343387, 21378990
67	RP1-155D22.1	6:164532059:A:T	6	164532059	rs206708	common	upstream_gene_variant		RP1-155D22.1				N/A	N/A	N/A	N/A		No	N/A
68	GET4	7:925949:A:G	7	925949	rs10226357	common	intron_variant		SUN1,GET4			SUN1	SUN1 - Sad1 and UNC84 domain containing 1	SUN1: Sad1 and UNC84 domain containing 1. This gene is a member of the unc-84 homolog family and encodes a nuclear nuclear envelope protein with an Unc84 (SUN) domain. The protein is involved in nuclear anchorage and migration	Yes	Yes	GWAS assoc with perceived unattractiveness to mosquitoes, cerebrospinal P-tau181p levels	No	No	28199695, 28247064	GET4 - Golgi to ER Traffic Protein 4	Golgi to ER Traffic Protein 4. Protein quality control complex that maintains misfolded proteins.	Yes	Yes	No	No	No
69	DGKB	7:14453835:A:G	7	14453835	rs56352403	common	intron_variant		DGKB		ETV1		DGKB - Diacylglycerol Kinase Beta	The protein encoded by this gene is a diacylglycerol kinase, beta isotype and among its related pathways are signaling by GPCR and Effects of PIP2 hydrolysis. GO annotations related to this gene include calcium ion binding and diacylglycerol kinase activity.	No	No		No	No		ETV1 - ETS Translocation Variant 1	This gene encodes a member of the ETS (E twenty-six) family of transcription factors. The ETS proteins regulate many target genes that modulate biological processes like cell growth, angiogenesis, migration, proliferation and differentiation.	Yes	Yes	Regulates expression of Nkx2-5, Gja and Scn5A. Required for rapid conduction in the heart of mice.	KO leads to cardiac conduction defects.	No	27775552
70	PRPS1L1	7:18040476:A:C	7	18040476	rs6961768	common	intergenic_variant		PRPS1L1, AC080080.1				PRPS1L1 - Phosphoribosyl pyrophosphate synthetase 1-like 1	Phosphoribosyl Pyrophosphate Synthetase 1-Like 1. Testis specific gene that encodes a protein homologous to PRPS1 and PRPS2, human X-linked genes.	No	No		No	No
71	DNAH11	7:21622494:C:T	7	21622494	rs62441680	common	intron_variant		DNAH11	DNAH11	ABCB5		DNAH11 - Dynein heavy chain 11	Dynein heavy chain beta-like. Microtubule associated motor protein complexes. DNAH11 is a putative axonemal outer dynein arm heavy chain.	No	No		No	N/A		ABCB5 - ATP Binding Cassette Subfamily B Member 5	ABCB5 belongs to the ATP-binding cassette (ABC) transporter superfamily of integral membrane proteins. These proteins participate in ATP-dependent transmembrane transport of structurally diverse molecules ranging from small ions, sugars, and peptides to more complex organic molecules	No	No	No	No	No
72	ELMO1	7:37398113:C:G	7	37398113	rs4720244	common	intron_variant		ELMO1				ELMO1 - Engulfment and cell motility 1	Required for the engulfment of dying cells and cell migrations. Specifically in mouse, this gene is required to remove apoptotic germ cells.	No	No		No	N/A	20844538
73	SEMA3A	7:83998676:C:T	7	83998676	rs62472627	common	intron_variant		SEMA3A,AC003984.1			SEMA3D	SEMA3A - Semaphorin 3A	SEMA3A: Semaphorin 3A, This gene is a member of the semaphorin family and encodes a protein with an Ig-like C2-type (immunoglobulin-like) domain, a PSI domain and a Sema domain. This secreted protein can function as either a chemorepulsive agent, inhibiting axonal outgrowth, or as a chemoattractive agent, stimulating the growth of apical dendrites. In both cases, the protein is vital for normal n…	No	No	GWAS assoc with alcohol dependence and major depression, autism spectrum disorder, obesity related traits, prion diseases, iris characteristics. Maintains normal heart rhythm through sympathetic innervation.	Double Knockout lack cardiac sympathetic innervation, have sinus bradycardia. Overexpression demonstrate sudden death and are susceptible to ventricular tachycardia. Sema3a: MGI:107558, dilated RA/RV.	No	29071344, 23453885, 23251661, 22210626, 21835309, 17417650.
74	CHRM2	7:136569416:C:T	7	136569416	rs1424569	common	intron_variant		hsa-mir-490,CHRM2	CHRM2, hsa-mir-490		CHRM2	CHRM2 - cholinergic receptor muscarinic 2	CHRM2: cholinergic receptor muscarinic 2. The muscarinic cholinergic receptors belong to a larger family of G protein-coupled receptors. The functional diversity of these receptors is defined by the binding of acetylcholine to these receptors and includes cellular responses such as adenylate cyclase inhibition, phosphoinositide degeneration, and potassium channel mediation. Muscarinic receptors i…	Yes	Yes	GWAS for copper levels, migraine with aura, heart rate, pulse pressure, resting heart rate	Chrm2: MGI:88397 CV phenotype, abnormal heart rate	No	28135244, 23583979, 23793025, 26025379
75	DLC1	8:13130478:C:T	8	13130478	rs1188285	common	intron_variant		DLC1			DLC1	DLC1 - DLC1 Rho GTPase Activating Protein	DLC1: DLC1 Rho GTPase activating protein. This gene encodes a GTPase-activating protein (GAP) that is a member of the rhoGAP family of proteins which play a role in the regulation of small GTP-binding proteins. GAP family proteins participate in signaling pathways that regulate cell processes involved in cytoskeletal changes	No	Yes	GWAS assoc for intraocular pressure, obstructive sleep apnoea, ankle injury, familial HepB virus related hepatocellular carcinoma, EBV copy number in LCLs	Dlc1: MGI:1354949 CV phenotype abnormal heart development		28654678, 28662289, 28957384, 29077507, 29617998
76	MTUS1	8:17550623:A:G	8	17550623	rs4921804	common	intron_variant		MTUS1		MTMR7	MTUS1	MTUS1 - microtubule associated scaffold protein 1	MTUS1: microtubule associated scaffold protein 1. This gene encodes a protein which contains a C-terminal domain able to interact with the angiotensin II (AT2) receptor and a large coiled-coil region allowing dimerization.	No	Yes	GWAS assoc for lung cancer, adenocarcinoma and yeast infection	Mtus1: MGI:2142572 cardiac hypertrophy	No	26732429, 26732429, 28928442
77	XPO7	8:21775838:C:G	8	21775838	rs56317071	common	upstream_gene_variant		XPO7		INTS10		NPM2 - nucleophosmin/nucleoplasmin 2	NPM2: nucleophosmin/nucleoplasmin 2.	No	No	GWAS assoc with obesity related traits, cerebrospinal fluid biomarker levels	No	No	23251661, 28031287	XPO7 - Exportin 7	Exportin 7, involved in transporting proteins and large RNA through the nuclear pore complex.	Yes	Yes	No	No	No	23251661, 28031287
78	RBPMS	8:30302465:C:T	8	30302465	rs4545054	common	intron_variant		RBPMS,GTF2E2			RBPMS	RBPMS - RNA binding protein, mRNA processing factor	RBPMS: RNA binding protein, mRNA processing factor. This gene encodes a member of the RNA recognition motif family of RNA-binding proteins. The RNA recognition motif is between 80-100 amino acids in length and family members contain one to four copies of the motif. The RNA recognition motif consists of two short stretches of conserved sequence, as well as a few highly conserved hydrophobic residu…	Yes	Yes	RBPMS: GWAS assoc with mean corpuscular volume;	No	No	26996949, 28017375, 20125193,	GTF2E2 - General transcription factor IIE subunit 2	The general transcription factor IIE (TFIIE) is part of the RNA polymerase II transcription initiation complex, recruiting TFIIH and being essential for promoter clearance by RNA polymerase II. TFIIE is a heterodimer (and sometimes heterotetramer) of alpha and beta subunits. The protein encoded by this gene represents the beta subunit of TFIIE.	Yes	Yes	GTF2E2: GWAS assoc with HF metabolite levels and cognitive performance	No	No	23934736
79	AZIN1*	8:103914366:A:C	8	103914366	rs565720	common	intron_variant,non_coding_transcript_variant		AZIN1,KB-1507C5.2,AZIN1-AS1	KB-1507C5.2			N/A	N/A	N/A	N/A		No	No
80	RP11-1082L8.3	8:125859817:A:C	8	125859817	rs35006907	common	intron_variant,non_coding_transcript_variant		RP11-1082L8.3,LINC00964	MTSS1, LINC00964			LINC00964, MTSS1	LINC00964. Long intergenic non-protein coding RNA 964.	No	No		No	No	28394258, 29221444, 29478026	MTSS1 I-BAR domain containing.	Regulates the cross-linking of F-actin bundles.	Yes	Yes	MTSS1: GWAS assoc with heart response to beta blockers, coronary artery plaque, left ventricle dimension during diastole	No	No	28394258, 29221444, 29478026, 14752106
81	PTK2	8:142006198:C:G	8	142006198	rs10106406	common	intron_variant		AGO2,PTK2		PTK2;DENND3	PTK2	PTK2 - Protein tyrosine kinase 2	Protein tyrosine kinase 2, also known as Focal Adhesion Kinase or FAK. Cytoplasmic tyrosine kinase concentrated in focal adhesions. Activation can lead to cell growth.	Yes	Yes		Yes - Inactivation in cardiomyocytes leads to hypertrophy and fibrosis. Inactivation in utero cardiomyocytes is lethal due to thin ventricular walls and ventricular septal defects. Any surviving mice have eccentric right ventricular hypertrophy.	No	16374517 18448675	AGO2 - Argonaute 2	Argonaute 2, binds to miRNA to mRNA within the RISC complex. Allows for translational inhibition or degradation of mRNA.	Yes	Yes	No	No	N/A
82	TRPM3	9:73482647:A:T	9	73482647	rs6560168	common	intron_variant		TRPM3				TRPM3 - transient receptor potential cation channel subfamily M member 3	TRPM3: transient receptor potential cation channel subfamily M member 3. The product of this gene belongs to the family of transient receptor potential (TRP) channels. TRP channels are cation-selective channels important for cellular calcium signaling and homeostasis. The protein encoded by this gene mediates calcium entry, and this entry is potentiated by calcium store depletion.	No	No	GWAS assoc with longevity, SSRI response, rubella, pubertal anthropometrics, venous thromboembolism, AMD, post bronchodilator FEV1, 3-hydroxypropylmercapturic acid levels in smokers	No	No	26634245, 26053186, 26691988, 28203683, 23449627, 28928442, 25897834, 20834067
83	RP11-15B24.5	9:85135915:A:C	9	85135915	rs7043482	common	intron_variant,non_coding_transcript_variant		RP11-15B24.5,RP11-15B24.2				N/A	N/A	No	No		No	No
84	ASTN2	9:119314851:C:T	9	119314851	rs1407243	common	intron_variant		ASTN2				ASTN2 - Astrotactin 2	Astrotactin 2 mediates recycling of ASTN1 in to anterior pole of migrating neurons.	No	No		No	No
85	PLPP7 (or PPAPDC3)	9:134203545:C:T	9	134203545	rs4584185	common	intergenic_variant		PLPP7	PPAPDC3			PPAPDC3 - Phospholipid phosphatase 7	PPAPDC3: phosphatidic acid phosphatase type 2 domain containing 3.	Yes	Yes		No	No
86	BEND7	10:13534234:C:T	10	13534234	rs7916672	common	intron_variant	10:13534851:A:G; synonymous_variant; BEND7	BEND7		NUDT5		BEND7 - BEN domain containing 7	BEND7: BEN domain containing 7.	Yes	No	GWAS assoc with IgG glycosylation, skin pigmentation, sporadic ALS	No	No	23382691, 24529757, 28300201
87	CCDC7	10:32847962:C:G	10	32847962	rs2947080	common	intron_variant		CCDC7			ITGB1, CCDC7	N/A	N/A	N/A	N/A		No	No
88	CEFIP	10:50510406:C:T	10	50510406	rs10776558	common	intron_variant		CEFIP		WDFY4	CEFIP	CEFIP - Cardiac-enriched FHL2-interacting protein	CEFIP or C10orf71, is thought to play a role in cardiomyocyte hypertrophy (by similarity or rat homolog).	Yes	No		Overexpression in rats leads to a foetal gene program in cardiomyocytes, ultimately producing hypertrophy.	No	28717008	WDFY4 - WDFY Family Member 4	WDFY family member 4 is a protein coding gene with no information on function, GO annotations indicate biding and phospholipid binding.	Yes	No		No	No
89	TMEM26	10:63194576:A:G	10	63194576	rs74813029	common	intron_variant		TMEM26,TMEM26-AS1			TMEM26	TMEM26 - transmembrane protein 26	TMEM26: transmembrane protein 26. This gene encodes a protein containing multiple transmembrane helices. It is a selective surface protein marker of brite/beige adipocytes, which may coexist with classical brown adipocytes in brown adipose tissue	No	No		No	No	24159190, 25918132, 29617998
90	COL13A1	10:71559723:C:T	10	71559723	rs2642608	common	upstream_gene_variant		COL13A1			COL13A1	COL13A1 - Collagen Type XIII Alpha 1 Chain	COL13A1: Involved in cell-matrix and cell-cell adhesion interactions that are required for normal development. May participate in the linkage between muscle fibre and basement membrane. May play a role in endochondral ossification of bone and branching morphogenesis of lung. Binds heparin. At neuromuscular junctions, may play a role in acetylcholine receptor clustering	Yes	No	GWAS assoc with asymmetrical dimethyl arginine levels, diisocyanate induced asthma, intraocular pressure, total cholesterol levels	KO in mice through truncation of protein leads to foetal lethality. Defects can be found in the adherence junctions in the heart, with detached myofilaments and abnormal cadherin junctions.	No	27002377, 26087016, 23793441, 20708005, 11566879
91	ZMIZ1	10:80898969:G:T	10	80898969	rs1769758	common	intron_variant		ZMIZ1 ZCCHC24		LINC00856;ZCCHC24	ZMIZ1+TN93:V93	ZMIZ1 - Zinc Finger MIZ-Type Containing 1	This gene encodes a member of the PIAS (protein inhibitor of activated STAT) family of proteins. The encoded protein regulates the activity of various transcription factors, including the androgen receptor, Smad3/4, and p53. The encoded protein may also play a role in simulation.	No	Yes		Death between 9.5-10.5 dpc. Mice are approximately half the size of wild-type littermates and display vascular and cell viability defects. Some heterozygotes also do not survive but those that do have no apparent defects.	No	29491472; 16862223	ZCCHC24 - Zinc Finger CCHC domain-containing protein 24	Zinc Finger CCHC domain-containing protein 24, a predicted intracellular protein. Expressed in the heart of Xenopus during later development.	Yes	Yes	No	No	No	24860994
92	U3	10:88509088:A:T	10	88509088	rs117443987	common	upstream_gene_variant		LDB3,U3,RP11-359E3.4,BMPR1A		CH25H	BMPR1A, LDB3	LDB3 - LIM Domain Binding 3	This gene encodes a PDZ domain-containing protein. PDZ motifs are modular protein-protein interaction domains consisting of 80-120 amino acid residues. PDZ domain-containing proteins interact with each other in cytoskeletal assembly or with other proteins involved in targeting and clustering of membrane proteins.	Yes	Yes	Cardiac arrhythmia and late-onset muscle weakness caused by a myofibrillar myopathy with unusual histopathological features due to a novel missense mutation in FLNC.	Homozygous mutation of this gene results in lethality within a few days after birth from muscle abnormalities. Mutant mice exhibit myopathy, dysphagia, heart vascular congestion, dilated heart ventricles, cyanosis, and respiratory distress.	Arimura et al. (2004) searched for LDB3 mutations in 96 unrelated Japanese patients with dilated cardiomyopathy who were negative for mutation in 11 other cardiomyopathy-related genes. A heterozygous missense mutation (D626N; 605906.0009) was identified in a late-onset familial case.	27633507; 26342832; 20869646; 19184181	BMPR1A - Bone Morphogenetic Protein Receptor Type 1A	The bone morphogenetic protein (BMP) receptors are a family of transmembrane serine/threonine kinases that include the type I receptors BMPR1A and BMPR1B and the type II receptor BMPR2. These receptors are also closely related to the activin receptors, ACVR1 and ACVR2. The ligands of these receptors are members of the TGF-beta superfamily.	Yes	No	No	Required for the development of atrioventricular canal and subsequent heart valves.	Candidate gene for septal defects	29787139, 22067610, 16037571
93	ADRB1	10:115782061:A:G	10	115782061	rs67234920	common	intergenic_variant		ADRB1			ADRB1	ADRB1 - Adrenoceptor Beta 1	The adrenergic receptors (subtypes alpha 1, alpha 2, beta 1, and beta 2) are a prototypic family of guanine nucleotide binding regulatory protein-coupled receptors that mediate the physiological effects of the hormone epinephrine and the neurotransmitter norepinephrine. Specific polymorphisms in this gene have been shown to affect the resting heart rate and can be involved in heart failure.	Yes	Yes	Signaling through the beta-1-adrenergic receptor is a key determinant of cardiac function	Mialet Perez et al. (2003) reported the targeted transgenic overexpression of beta-1 adrenergic receptor carrying the arg389 or the gly389 variant (109630.0001) in mouse ventricles, revealing an allele-specific cardiac phenotype that was recapitulated in human heart failure.		14502278; 11854867; 12197595
94	FGFR2	10:123348662:G:T	10	123348662	rs2912774	common	intron_variant		FGFR2			FGFR2	FGFR2 - Fibroblast Growth Factor Receptor 2	The extracellular portion of the protein interacts with fibroblast growth factors, setting in motion a cascade of downstream signals, ultimately influencing mitogenesis and differentiation. This particular family member is a high-affinity receptor for acidic, basic and/or keratinocyte growth factor, depending on the isoform.	Yes	No		FGFR2-IIIb KO mice have ventricular septal defects. Mice also have thin myocardium, abnormal trabeculation and ventricular defects.	No	16687131
95	MPPED2	11:30432176:C:T	11	30432176	rs553951	common	3_prime_UTR_variant		MPPED2			MPPED2	MPPED2 - Metallophosphoesterase Domain Containing 2	This gene likely encodes a metallophosphoesterase. The encoded protein may play a role a brain development.	No	No		No	No
96	WT1	11:32372772:A:G	11	32372772	rs11031737	common	intergenic_variant		WT1				WT1 - Wilms Tumor 1	This gene encodes a transcription factor that contains four zinc-finger motifs at the C-terminus and a proline/glutamine-rich DNA-binding domain at the N-terminus. It has an essential role in the normal development of the urogenital system. This gene exhibits complex tissue-specific and polymorphic imprinting pattern, with biallelic, and monoallelic expression from the maternal and paternal allel…	No	No		Homozygous mutants fail to develop normal kidneys or gonads, and on some genetic backgrounds, a spleen. Mutants have abnormalities of the heart, mesothelium and lungs and die between embryonic day 13.5 and birth.	No
97	PCNXL3	11:65391317:A:G	11	65391317	rs12801636	common	intron_variant	11:65384727:C:T; synonymous_variant; PCNXL3	KCNK7,PCNXL3,SIPA1			MAP3K11, PCNXL3	PCNXL3 - Pecanex Homolog 3	PCNX3 (Pecanex Homolog 3), previously HGNC symbol PCNXL3, is a Protein Coding gene. An important paralog of this gene is PCNX1.	No	Yes		No	No	29212778	KCNK7 -Potassium Two Pore Domain Channel Subfamily K Member 7	This gene encodes a member of the superfamily of potassium channel proteins containing two pore-forming P domains. The product of this gene has not been shown to be a functional channel; however, it may require other non-pore-forming proteins for activity.	No	No	No	Mice homozygous for a knock-out allele are viable, fertile and behaviourally normal with no significant alterations in volatile anaesthetic sensitivity.	None		SIPA1 - Signal-Induced Proliferation-Associated 1	The product of this gene is a mitogen induced GTPase activating protein (GAP). It exhibits a specific GAP activity for Ras-related regulatory proteins Rap1 and Rap2, but not for Ran or other small GTPases. This protein may also hamper mitogen-induced cell cycle progression when abnormally or prematurely expressed.	Cytoplasmic expression in immune cells.	No	No	Homozygous null mice display chronic myelocytic leukemia in either the chronic phase or blast crisis.	No	9651531
98	CRYAB	11:111776066:A:G	11	111776066	rs12808601	common	downstream_gene_variant		ALG9,C11orf1,RPL37AP8,CRYAB	C11orf1		CRYAB, DIXDC1	CRYAB - Crystallin Alpha B	CRYAB (Crystallin Alpha B) is a Protein Coding gene. Diseases associated with CRYAB include Myopathy, Myofibrillar, 2 and Cataract 16, Multiple Types. Among its related pathways are Protein processing in endoplasmic reticulum and Longevity regulating pathway.	Yes	Yes	Cardiac arrhythmia and late-onset muscle weakness caused by a myofibrillar myopathy with unusual histopathological features.	No - Mice homozygous or heterozygous for a knock-in allele exhibit decreased grip strength and develop cataracts and myopathy; some mice display unilateral corneal abnormalities and small eyes.	Fardeau et al. (1978), Vicart et al. (1998) identified a heterozygous mutation in the CRYAB gene (123590.0001). Affected individuals also exhibited clinical or electrocardiographic signs of hypertrophic cardiomyopathy and discrete lens opacities.	27633507	ALG9 - Alpha-1,2-Mannosyltransferase	This gene encodes an alpha-1,2-mannosyltransferase enzyme that functions in lipid-linked oligosaccharide assembly. Mutations in this gene result in congenital disorder of glycosylation type Il.	Yes	No	No	None			RPL37AP8 -Ribosomal Protein L37a Pseudogene 8	Pseudogene. Gene Ontology (GO) annotations related to this gene include structural constituent of ribosome.	No	No	No	No	No
99	USP28	11:113666335:A:G	11	113666335	rs144789148	low frequency	downstream_gene_variant		USP28			USP28	USP28 - Ubiquitin Specific Peptidase 28	The protein encoded by this gene is a de-ubiquitinase involved in the DNA damage pathway and DNA damage-induced apoptosis. Overexpression of this gene is seen in several cancers.	Yes	Yes		No CV phenotype - Mice homozygous for a knock-out allele are viable and fertile and exhibit slightly decreased spleen weight and splenocyte number but show neither major signaling defects in DNA damage response nor developmental defects indicative of impaired double-strand break metabolism.	No
100	PDE3A	12:20544361:C:T	12	20544361	rs10770646	common	intron_variant		PDE3A			PDE3A	PDE3A - Phosphodiesterase 3A	This gene encodes a member of the cGMP-inhibited cyclic nucleotide phosphodiesterase (cGI-PDE) family. cGI-PDE enzymes hydrolyse both cAMP and cGMP, and play critical roles in many cellular processes by regulating the amplitude and duration of intracellular cyclic nucleotide signals. The encoded protein mediates platelet aggregation and also plays important roles in cardiovascular function by reg…	Yes	Yes		No. Mammalian oocytes are physiologically arrested in prophase I, i.e., prophase of the first meiotic division, until shortly before ovulation.	Diseases associated with PDE3A include Hypertension And Brachydactyly Syndrome and Brachydactyly, OMIM 112410.
101	SSPN	12:26306484:C:T	12	26306484	rs78518764	common	intron_variant		SSPN			SSPN	SSPN - Sarcospan	This gene encodes a member of the dystrophin-glycoprotein complex (DGC). The DGC spans the sarcolemma and is comprised of dystrophin, syntrophin, alpha- and beta-dystroglycans and sarcoglycans. The DGC provides a structural link between the subsarcolemmal cytoskeleton and the extracellular matrix of muscle cells.	No	No	Nkx2-5 and Sarcospan genetically interact in the development of the muscular ventricular septum of the heart. Sarcospan Regulates Cardiac Isoproterenol Response and Prevents Duchenne Muscular Dystrophy-Associated Cardiomyopathy. Prevention of cardiomyopathy in mouse models lacking the smooth muscle sarcoglycan-sarcospan complex.	No (Mice homozygous for a targeted null mutation exhibit no discernible phenotype; mice are viable and fertile with normal muscle histology and physiology.)	No	26702077; 28406175; 11160141
102	ARID2	12:46209520:C:T	12	46209520	rs76611452	low frequency	intron_variant		ARID2		RNY5		ARID2 - AT-Rich Interaction Domain 2	This protein functions as a subunit of the polybromo- and BRG1-associated factor or PBAF (SWI/SNF-B) chromatin remodelling complex which facilitates ligand-dependent transcriptional activation by nuclear receptors.	No	No	Zipzap/p200 is a novel zinc finger protein contributing to cardiac gene regulation. BAF200 is required for heart morphogenesis and coronary artery development.	Mice homozygous for a knock-out allele exhibit embryonic lethality between E12.5 and E14.5, congenital heart defects, impaired coronary artery development, subcutaneous edema and haemorrhage.	No	25299188; 16782067	RNY5 - Y5 Small cytoplasmic RNA	Y RNAs are required for DNA replication in G1-phase nuclei.	No	No	One of nine LncRNAs significantly modulated in end-stage failing human hearts.	No	No	27317124
103	SRGAP1	12:64283014:A:G	12	64283014	rs17099893	common	intron_variant		AC084357.1,SRGAP1,RASSF3		FAM19A2	SRGAP1	SRGAP1 - SLIT-ROBO Rho GTPase Activating Protein 1	The protein encoded by this gene is a GTPase activator, working with the GTPase CDC42 to negatively regulate neuronal migration. The encoded protein interacts with the transmembrane receptor ROBO1 to inactivate CDC42.	No	Yes		No	No		RASSF3 - Ras association domain family member 3	45% identical homolog to RASSF1.	Yes	Yes	No	No
104	MIR6074; HMGA2	12:66394664:C:T	12	66394664	rs4026608	common	intergenic_variant		MIR6074, HMGA2				MIR6074 - MicroRNA 6074	MIR6074 (MicroRNA 6074) is an RNA Gene, and is affiliated with the miRNA class.	No	No		No	No		HMGA2 - High Mobility Group AT-Hook 2	This gene encodes a protein that belongs to the non-histone chromosomal high mobility group (HMG) protein family. HMG proteins function as architectural factors and are essential components of the enhanceosome. This protein contains structural DNA-binding domains and may act as a transcriptional regulating factor.	Yes	No	No	No	No
105	SLC6A15	12:84806298:A:G	12	84806298	rs10862858	common	intergenic_variant		RP11-228G3.1			TMTC2	SLC6A15 - Solute Carrier Family 6 Member 15	This gene encodes a member of the solute carrier family 6 protein family which transports neutral amino acids. The encoded protein is thought to play a role in neuronal amino acid transport and may be associated with major depression.	No	No		No	No	16185194, 21521612
106	HCFC2	12:104503806:A:G	12	104503806	rs2629745	common	downstream_gene_variant		HCFC2,NFYB,RP11-818F20.4,TXNRD1				HCFC2 - Host Cell Factor C2	This gene encodes one of two proteins which interact with VP16, a herpes simplex virus protein that initiates virus infection. Both the encoded protein and the original Herpes host cell factor interact with VP16 through a beta-propeller domain.	Yes	Yes		No CV phenotype - Mice homozygous for null or severely hypomorphic allele exhibit reduced poly(I:C)-mediated TLR3 signaling and increased mortality following viral infection.	No		NFYB - Nuclear Transcription Factor Y Subunit Beta	The protein encoded by this gene is one subunit of a trimeric complex, forming a highly conserved transcription factor that binds with high specificity to CCAAT motifs in the promoter regions in a variety of genes.	Yes	Yes	No	No	No		TXNRD1 - Thioredoxin Reductase 1	The protein encoded by this gene belongs to the pyridine nucleotide-disulphide oxidoreductase family, and is a member of the thioredoxin (Trx) system. Three thioredoxin reductase (TrxR) isozymes are found in mammals. TrxRs are selenocysteine-containing flavoenzymes, which reduce thioredoxins, as well as other substrates, and play a key role in redox homoeostasis.	Ubiquitous cytoplasmic expression.	Expression in the heart	No	Homozygous null mice exhibit early embryonic lethality (by E10.5) and display severe growth retardation and fail to turn. Embryos also exhibit decreased cell proliferation.	No	7589432, 9671710
107	RIC8B	12:107166122:C:G	12	107166122	rs3759310	common	upstream_gene_variant	12:107090201:C:T; synonymous_variant; RFX4	RFX4,RP11-144F15.1,RIC8B,EEF1B2P4			RFX4	RIC8B - RIC8 Guanine Nucleotide Exchange Factor B	GO annotations related to this gene include binding and guanyl-nucleotide exchange factor activity. An important paralog of this gene is MIR6743.	Yes	Yes		It is embryonic lethal, IMPC. Hets, decreased heart weight, also heart rate locus and CV phenotype	No
108	UBE3B	12:109976893:G:T	12	109976893	rs2004359	common	downstream_gene_variant		MYO1H,KCTD10,UBE3B,MMAB,MVK		UBE3B;KCTD10	UBE3B, KCTD10	UBE3B - Ubiquitin Protein Ligase E3B	Diseases associated with UBE3B include Kaufman Oculocerebrofacial Syndrome and Blepharophimosis. Among its related pathways are Innate Immune System and Class I MHC mediated antigen processing and presentation.	Yes	Yes		No CV phenotype	No		KCTD10 - Potassium channel tetramerization domain containing 10	Critical protein within the protein complex found in the base of cilia.	Yes	Yes	No	No	No	15982757	MVK - Mevalonate Kinase	This gene encodes the peroxisomal enzyme mevalonate kinase. Mevalonate is a key intermediate, and mevalonate kinase a key early enzyme, in isoprenoid and sterol synthesis. Mevalonate kinase deficiency caused by mutation of this gene results in mevalonic aciduria, a disease characterized psychomotor retardation, failure to thrive, hepatosplenomegaly, anaemia and recurrent febrile crises.	Yes	No	No	No	No		MYO1H - Myosin IH	Intracellular protein that [lays a role in cell motility, phagocytosis and vesicle transport.	No	No	No	No	No	22196185	KCTD10 - Potassium channel tetramerization domain-containing protein 10	Potassium channel tetramerization domain-containing protein 10. Known to regulate heart morphogenesis by repressing Tbx5A in zebrafish.	Yes	Yes	None
109	TESC	12:117491824:A:G	12	117491824	rs7972416	common	intron_variant		FBXW8,TESC	TESC		TESC	TESC - Tescalcin	GO annotations related to this gene include calcium ion binding and magnesium ion binding. An important paralog of this gene is CHP1.	No	Yes		No	No
110	FREM2	13:39261151:G:T	13	39261151	rs9634754	common	upstream_gene_variant		LINC00437,FREM2			FREM2	FREM2 - FRAS1 Related Extracellular Matrix Protein 2	This gene encodes an integral membrane protein containing numerous CSPG (chondroitin sulphate proteoglycan element) repeats and Calx-beta domains. The encoded protein localizes to the basement membrane, forming a ternary complex that plays a role in epidermal-dermal interactions. This protein is important for the integrity of skin and renal epithelia.	No	No		No CV phenotype - Mice homozygous for mutations at this locus display a significant amount of embryonic lethality due to haemorrhaging of embryonic blisters. Kidney development is severely affected and syndactyly is common. Phenotypes of homozygous mutants are indistinguishable from those of Fras1 homozygous mutant.	No		LINC00437 - Long Intergenic Non-Protein Coding RNA 437	A non-coding RNA gene - function currently unknown.	No	No	No	No	No
111	FGF14	13:102878269:C:T	13	102878269	rs9513995	common	intron_variant		FGF14				FGF14 - Fibroblast Growth Factor 14	FGF14 (Fibroblast Growth Factor 14) is a Protein Coding gene. A mutation in this gene is associated with autosomal dominant cerebral ataxia.	No	No	Fibroblast growth factor homologous factors in the heart: a potential locus for cardiac arrhythmias	No CV phenotype - Mice homozygous for disruptions in this gene display impaired balance and grip strength.	No	22867699						No	No
112	ARHGEF40	14:21545230:A:G	14	21545230	rs12885183	common	intron_variant		ARHGEF40,ZNF219		NDRG2	ARHGEF40, ZNF219	ARHGEF40 - Rho Guanine Nucleotide Exchange Factor 40	This gene encodes a protein similar to guanosine nucleotide exchange factors for Rho GTPases. The encoded protein contains in its C-terminus a GEF domain involved in exchange activity and a pleckstrin homology domain.	No	Yes		No	No	27798624	ZNF219 - Zinc Finger Protein 219	This gene is a member of the Kruppel-like zinc finger gene family. The encoded protein functions as a transcriptional repressor of the high mobility group nucleosome binding domain 1 protein, which is associated with transcriptionally active chromatin.	Yes	Yes	No	No	No	27798624
113	RP11-562L8.1	14:29750244:A:G	14	29750244	rs7146955	common	intron_variant,non_coding_transcript_variant		RP11-562L8.1				N/A	N/A	N/A	N/A		No	No
114	AKAP6	14:32923336:A:G	14	32923336	rs3784192	common	intron_variant		AKAP6		GPR33		AKAP6 - A-kinase anchoring protein 6	This gene encodes a member of the AKAP family. The encoded protein is highly expressed in various brain regions and cardiac and skeletal muscle. It is specifically localized to the sarcoplasmic reticulum and nuclear membrane, and is involved in anchoring PKA to the nuclear membrane or sarcoplasmic reticulum.	Yes	Yes	mAKAP – A Master Scaffold for Cardiac Remodelling.	No	No	25551320	GPR33 - G protein-coupled receptor 33	Pseudogene - no function.
115	NFKBIA	14:35871217:A:G	14	35871217	rs8904	common	3_prime_UTR_variant		NFKBIA				NFKBIA - NFKB Inhibitor Alpha	This gene encodes a member of the NF-kappa-B inhibitor family, which contain multiple ankyrin repeat domains. The encoded protein interacts with REL dimers to inhibit NF-kappa-B/REL complexes which are involved in inflammatory responses.	Yes	Yes		No CV phenotype - Mice homozygous for disruptions in this gene die at about 1 week of age experiencing abnormalities in the immune system. Mice homozygous for an allele disrupting the N-terminal nuclear export signal exhibit impaired B cell maturation, decreased CD4+ memory T cells, and decreased regulatory T cells.	None	28739976
116	SYNE2	14:64457638:G:T	14	64457638	rs1255908	common	intron_variant		SYNE2	SYNE2		SYNE2	SYNE2 - Spectrin Repeat Containing Nuclear Envelope Protein 2	The protein encoded by this gene is a nuclear outer membrane protein that binds cytoplasmic F-actin. This binding tethers the nucleus to the cytoskeleton and aids in the maintenance of the structural integrity of the nucleus.	Yes	Yes		Not CV unless SYNE1 also KO. Targeted ablation of nesprin 1 and nesprin 2 from murine myocardium results in cardiomyopathy, altered nuclear morphology and inhibition of the biomechanical gene response.	Yes	28416818; 22544366; 24586179
117	FLRT2	14:86041160:A:G	14	86041160	rs17712080	common	intron_variant		FLRT2			FLRT2	FLRT2 - Fibronectin Leucine Rich Transmembrane Protein 2	This gene encodes a member of the fibronectin leucine rich transmembrane (FLRT) family of cell adhesion molecules, which regulate early embryonic vascular and neural development.	No	No		Mice homozygous for a knock-out allele exhibit embryonic, foetal, and postnatal lethality with few mice surviving to weaning due to defects in epicardium, myocardium, and endocardium development.	No	28416818
118	RP11-1070N10.3	14:95983975:A:G	14	95983975	rs179145	common	3_prime_UTR_variant		RP11-1070N10.3	RP11-1070N10.3			N/A	N/A	N/A	N/A		No	No
119	MARK3	14:103851272:A:G	14	103851272	rs3759579	common	upstream_gene_variant		MARK3,CKB			CKB, MARK3	MARK3 - Microtubule Affinity Regulating Kinase 3	The protein encoded by this gene is activated by phosphorylation and in turn is involved in the phosphorylation of tau proteins MAP2 and MAP4.	Yes	Yes		No	No
120	RBPMS2	15:65035979:A:G	15	65035979	rs3935716	common	intron_variant	15:65041622:A:C; splice_region_variant,intron_variant; RBPMS2	CSNK1G1,KIAA0101,TRIP4,ZNF609,RP11-702L15.4,OAZ2,AC100830.3,RBPMS2,PLEKHO2	TRIP4	OAZ2;ANKDD1A;TLN2	RBPMS2	RBPMS2 - RNA Binding Protein, MRNA Processing Factor 2	The protein encoded by this gene is a member of the RNA recognition motif (RRM)-containing protein family and is involved in the development and dedifferentiation of digestive smooth muscle cells. The encoded protein functions as a homodimer and indirectly inhibits the bone morphogenetic protein pathway.	No	Yes		No	No		OAZ2 - Ornithine Decarboxylase Antizyme 2	The protein encoded by this gene belongs to the ornithine decarboxylase antizyme family, which plays a role in cell growth and proliferation by regulating intracellular polyamines. Expression of antizymes requires +1 ribosomal frameshifting, which is enhanced by high levels of polyamines.	Yes	Yes	No	No	No		PLEKHO2 - Pleckstrin Homology Domain Containing O2	PLEKHO2 (Pleckstrin Homology Domain Containing O2) is a Protein Coding gene. Among its related pathways are Innate Immune System and PEDF Induced Signaling.	Cytoplasmic expression in most tissues.	Expression in heart	None	No	No		TLN2 - Talin 2	Talin 2, interacts with PIP5K1C, increases local production of PIP2.	Yes	Yes	N/A	No	No
121	CORO2B	15:69021265:D:I	15	69021265	rs11330601	common	downstream_gene_variant		CORO2B				CORO2B - Coronin 2B	an actin-binding protein that is involved in cell motility, cytokinesis, and phagocytosis, all of which depend on cytoskeletal rearrangement.	No	No		No	No	10224093
122	HCN4	15:73664723:A:T	15	73664723	rs8039168	common	upstream_gene_variant		HCN4			HCN4	HCN4 - Hyperpolarisation-activated cyclic nucleotide-gated potassium channel 4	Found in developing cardiac tissues. Controls rhythmic activity in pacemaker heart cells.	Yes	Yes	Pacemaker activity of the human sinoatrial node: an update on the effects of mutations in HCN4 on the hyperpolarization-activated current.	Mice homozygous for disruptions in this gene experience embryonic lethality between E9.5 and E11.5. Conditional deletion in cardiac tissue results in severe bradycardia and death. Mice over-expressing the gene exhibit impaired firing rate in ORN, small olfactory bulb and reduced glomeruli.	Yes, evidence that HCN4 variants lead to Sick Sinus Syndrome ( Type 2) and Brugada Syndrome (Type 8)	25642760; 24569893; 25442735; 28613276; 28613276; 178646576; 19165230
123	ALPK3	15:85372645:A:T	15	85372645	rs6496452	common	intron_variant		ZSCAN2,SCAND2P,WDR73,NMB,SEC11A,ZNF592,ALPK3	WDR73	SCAND2P		ALPK3 - Alpha Kinase 3	Diseases associated with ALPK3 include Epiphyseal Dysplasia, Multiple, With Early-Onset Diabetes Mellitus and Dilated Cardiomyopathy.	Yes	Yes		Mice homozygous for a gene-trapped allele exhibit altered cardiomyocyte architecture and develop a non-progressive cardiomyopathy that presents features of both hypertrophic and dilated forms of cardiomyopathy.	Familial cardiomyopathy.	26846950, 27106955	SEC11A - SEC11 Homolog A, Signal Peptidase Complex Subunit	This gene encodes a member of the peptidase S26B family. The encoded protein is an 18kDa subunit of the signal peptidase complex and has been linked to cell migration and invasion, gastric cancer and lymph node metastasis.	No	Yes	No	No	No		ZNF592 - Zinc Finger Protein 592	This gene is thought to play a role in a complex developmental pathway and the regulation of genes involved in cerebellar development. Mutations in this gene have been associated with autosomal recessive spinocerebellar ataxia.	Ubiquitous nuclear and cytoplasmic expression in most tissues.	Northern blot analysis detected ZNF592 expression in all tissues examined, with highest levels in heart and skeletal muscle.	None	No	No
124	NR2F2; LINC00924	15:96460899:C:T	15	96460899	rs62008078	common	intergenic_variant		NR2F2, LINC00924		MIR1469		NR2F2 - Nuclear Receptor Subfamily 2 Group F Member 2	This gene encodes a member of the steroid thyroid hormone superfamily of nuclear receptors. The encoded protein is a ligand inducible transcription factor that is involved in the regulation of many different genes. Alternate splicing results in multiple transcript variants.	No	Yes		Homozygotes for a targeted null mutation exhibit impaired angiogenesis and heart development with haemorrhagic brains and hearts, and die around embryonic day 10. About 5% of heterozygotes share the haemorrhagic phenotype at embryonic day 9.5.	Congenital Heart Defects: Atrioventricular Septal, Aortic Stenosis and Ventricular Septal.	24702954;	LINC00924 - Long Intergenic Non-Protein Coding RNA 924	LINC00924 (Long Intergenic Non-Protein Coding RNA 924) is an RNA Gene, and is affiliated with the non-coding RNA class.	No	No	No	No	No
125	SPSB3	16:1828030:A:G	16	1828030	rs35816944	rare	missense_variant	16:1838604:C:T; synonymous_variant; NUBP2	BAIAP3,CLCN7,IFT140,MAPK8IP3,NUBP2,MEIOB			CRAMP1L, TMEM204	SPSB3 - SplA/Ryanodine Receptor Domain And SOCS Box Containing 3	SPSB3 (SplA/Ryanodine Receptor Domain And SOCS Box Containing 3) is a Protein Coding gene.	Yes	Yes		No	No		MAPK8IP3 - Mitogen-Activated Protein Kinase 8 Interacting Protein 3	The protein encoded by this gene shares similarity with the product of Drosophila syd gene, required for the functional interaction of kinesin I with axonal cargo. Studies of the similar gene in mouse suggested that this protein may interact with, and regulate the activity of numerous protein kinases of the JNK signaling pathway, and thus function as a scaffold protein in neuronal cells.	Yes	Yes	No	Homozygous inactivation of this gene results in impaired lung morphogenesis, causes absence of the telencephalic commissure with multiple defects in brain development and axon guidance, may affect synaptic transmission, and invariably leads to neonatal death due to respiratory failure.	No		NUBP1 - Nucleotide Binding Protein 2	This gene encodes an adenosine triphosphate (ATP) and metal-binding protein that is required for the assembly of cytosolic iron-sulphur proteins. The encoded protein functions in a heterotetramer with nucleotide-binding protein 1 (NUBP1).	Ubiquitous cytoplasmic expression.	Weak expression.	None	No	No
126	SRL	16:4282284:A:C	16	4282284	rs79321945	common	intron_variant		SRL,RP11-95P2.1,TFAP4			SRL	SRL - Sarcalumenin	Sarcalumenin, regulates calcium store functions in cardiac and skeletal muscle.	Yes	Yes		Mice deficient in Sarcalumenin show slow contraction and relaxation, with impaired Ca2+ transients.	No	15569689
127	MYH11*	16:15834729:C:T	16	15834729	rs72772025	common	intron_variant		KIAA0430,NDE1,MYH11	NPIPA5			MYH11 - Myosin Heavy Chain 11	The protein encoded by this gene is a smooth muscle myosin belonging to the myosin heavy chain family. The gene product is a subunit of a hexameric protein that consists of two heavy chain subunits and two pairs of non-identical light chain subunits. It functions as a major contractile protein, converting chemical energy into mechanical energy through the hydrolysis of ATP.	No	No		Homozygous null mice have impaired smooth muscle contractility. They are incapable of urinating, exhibit dilative cardiomyopathy, are growth retarded, and die within 3 days of birth.	Familial clustering of common thoracic aortic aneurysm/aortic dissection (TAAD), one of the most severe cardiovascular conditions in adults, is heterogeneous, with 1 locus having been mapped to chromosome 16p13.1-p12.2 (AAT4; 132900). The MYH11 gene is located in the critical linkage region for AAT4. Zhu et al. (2006) performed systematic mutation screening, which showed 2 heterozygous mutations …		MARF1 (or KIAA0430) - Meiosis Regulator And MRNA Stability Factor 1	This gene encodes a putative peroxisomal protein that appears to be conserved across Euteleostomi. In humans, it may be autoantigenic.	Yes	No	No	Mice homozygous for an ENU-induced mutation exhibit female infertility with abnormalities in oogenic processes including meiotic progression, genomic integrity and acquisition of developmental competence.	No		NDEL1 - NudE Neurodevelopment Protein 1	This gene encodes a member of the nuclear distribution E (NudE) family of proteins. The encoded protein is localized at the centrosome and interacts with other centrosome components as part of a multiprotein complex that regulates dynein function. This protein plays an essential role in microtubule organization, mitosis and neuronal migration.	Cytoplasmic expression in several tissues, most abundant in lymphoid tissues.Western blot analysis of mouse tissues detected highest expression in brain, with much lower expression in heart, skeletal muscle, and lung, and little to no expression in other tissues examined.	No expression	None	No	No
128	LINC02140; IRX3	16:54598337:A:G	16	54598337	rs1186818	common	intergenic_variant		AC079412.1			IRX3	LINC02140 - Long Intergenic Non-Protein Coding RNA 2140	LINC02140 (Long Intergenic Non-Protein Coding RNA 2140) is an RNA Gene, and is affiliated with the non-coding RNA class.	No	No		No	No		IRX3 - Iroquois Homeobox 3	IRX3 is a member of the Iroquois homeobox gene family (see IRX1; MIM 606197) and plays a role in an early step of neural development.	No	Yes	No	No	No
129	CNOT1	16:58584772:G:T	16	58584772	rs7199856	common	intron_variant	16:58579274:C:T; synonymous_variant; CNOT1	NDRG4,SETD6,CNOT1	NDRG4	SLC38A7;CNOT1;CSNK2A2		CNOT1 - CCR4-NOT Transcription Complex Subunit 1	Diseases associated with CNOT1 include Iritis.	Yes	Yes		Mice homozygous for a conditional allele activated in cardiomyocytes exhibit postnatal lethality, decreased cardiac muscle contractility, prolonged QT interval and cardiac muscle cell death.	No		NDRG4 - NDRG Family Member 4	This gene is a member of the N-myc downregulated gene family which belongs to the alpha/beta hydrolase superfamily. The protein encoded by this gene is a cytoplasmic protein that is required for cell cycle progression and survival in primary astrocytes and may be involved in the regulation of mitogenic signalling in vascular smooth muscles cells.	No	Yes	No	No	No	22726844; 19305409; 19305408	SETD6 - SET Domain Containing 6	This gene encodes a methyltransferase that adds a methyl group to the histone H2AZ, which is involved in nuclear receptor-dependent transcription. The protein also interacts with several endogenous proteins which are involved in nuclear hormone receptor signaling.	General cytoplasmic expression.	Very weak expression	None	No	No	29213071
130	LINC01082; IRF8	16:86184639:A:G	16	86184639	rs904199	common	intergenic_variant		LINC01082, IRF8				IRF8 - Interferon Regulatory Factor 8	Interferon consensus sequence-binding protein (ICSBP) is a transcription factor of the interferon (IFN) regulatory factor (IRF) family. Proteins of this family are composed of a conserved DNA-binding domain in the N-terminal region and a divergent C-terminal region that serves as the regulatory domain. The IRF family proteins bind to the IFN-stimulated response element (ISRE) and regulate express…	No	No	IRF is decreased in human cardiomyopathic hearts.	Overexpression in mice leads to resistance to aortic banding induced hypertrophy. Knockout mice are much more susceptible to pressure overload.	No	24526256
131	ZFPM1	16:88553198:C:T	16	88553198	rs28634651	common	intron_variant		ZFPM1			ZFPM1	ZFPM1 - Zinc Finger Protein, FOG Family Member 1	ZFPM1 (Zinc Finger Protein, FOG Family Member 1) is a Protein Coding gene. Diseases associated with ZFPM1 include Thrombocytopenia 1 and Dyserythropoietic Anaemia And Thrombocytopenia.	Yes	Yes		No	No
132	MINK1	17:4801163:A:C	17	4801163	rs7774	common	3_prime_UTR_variant		MINK1,CHRNE			ENO3	MINK1 - Misshapen Like Kinase 1	This gene encodes a serine/threonine kinase belonging to the germinal centre kinase (GCK) family. The protein is structurally similar to the kinases that are related to NIK and may belong to a distinct subfamily of NIK-related kinases within the GCK family.	No	Yes		No	No		CHRNE - Cholinergic Receptor Nicotinic Epsilon Subunit	Acetylcholine receptors at mature mammalian neuromuscular junctions are pentameric protein complexes composed of four subunits in the ratio of two alpha subunits to one beta, one epsilon, and one delta subunit. The acetylcholine receptor changes subunit composition shortly after birth when the epsilon subunit replaces the gamma subunit seen in embryonic receptors.	No	Yes	No	No	No
133	EFCAB5	17:28312993:C:T	17	28312993	rs55866125	common	intron_variant		ANKRD13B,CORO6,SSH2,EFCAB5,NSRP1,SLC6A4		EFCAB5	CORO6	EFCAB5 - EF-Hand Calcium Binding Domain 5	EFCAB5 (EF-Hand Calcium Binding Domain 5) is a Protein Coding gene.	No	No		No	No	27659466	CORO6 - Coronin 6	CORO6 (Coronin 6) is a Protein Coding gene. Gene Ontology (GO) annotations related to this gene include actin filament binding. An important paralog of this gene is CORO1B.	No	Yes	No	No	No	29212778	NSRP1 - Nuclear Speckle Splicing Regulatory Protein 1	NSRP1 (Nuclear Speckle Splicing Regulatory Protein 1) is a Protein Coding gene. Gene Ontology (GO) annotations related to this gene include mRNA binding.	Ubiquitous nuclear expression.	Weak expression.	None	Mice homozygous for a gene trap allele exhibit die prior to E6.5.	No	27659466
134	CACNA1G	17:48666064:C:T	17	48666064	rs757416	common	intron_variant		CACNA1G				CACNA1G - Calcium Voltage-Gated Channel Subunit Alpha1 G	This gene encodes a T-type, low-voltage activated calcium channel. The T-type channels generate currents that are both transient, owing to fast inactivation, and tiny, owing to small conductance. T-type channels are thought to be involved in pacemaker activity, low-threshold calcium spikes, neuronal oscillations and resonance, and rebound burst firing.	No	Yes	Congenital heart block maternal sera autoantibodies target an extracellular epitope on the α1G T-type calcium channel in human foetal hearts.	No	No	24039792
135	CSHL1	17:61987405:A:T	17	61987405	rs2006122	common	intron_variant		TACO1,RP11-51F16.9,MAP3K3,LIMD2,STRADA,CCDC47,DDX42,FTSJ3,PSMC5,SMARCD2,TCAM1P,CSH2,GH2,RP11-630H24.3,RP11-630H24.4,CSHL1,GH1	MAP3K3, DDX42	TEX2	MAP3K3	CSHL1 - Chorionic Somatomammotropin Hormone Like 1	The protein encoded by this gene is a member of the somatotropin/prolactin family of hormones which play an important role in growth control.	No	No		No - Mice homozygous for an ENU-induced allele exhibit dwarfism, an increased percentage of body white and brown fat, elevated plasma ghrelin levels, pituitary hypoplasia, small liver, delayed sexual maturation, and reduced fertility. Heterozygotes display a less pronounced phenotype.	No		TACO1 - Translational Activator Of Cytochrome C Oxidase I	This gene encodes a mitochondrial protein that function as a translational activator of mitochondrially-encoded cytochrome c oxidase 1. Mutations in this gene are associated with Leigh syndrome.	Yes	Yes	No	Homozygous null mice exhibit retinal neuron degeneration, cardio hypertrophy and motor dysfunction as a result of isolated complex IV deficiency.	No	27319982	MAP3K3 - Mitogen-Activated Protein Kinase Kinase Kinase 3	MAP3K3 (Mitogen-Activated Protein Kinase Kinase Kinase 3) is a Protein Coding gene. Diseases associated with MAP3K3 include Cerebral Cavernous Malformations and Cerebral Cavernous Malformations 2. Among its related pathways are NFAT and Cardiac Hypertrophy and IL-1 signaling pathway.	Cytoplasmic expression in lung macrophages, a subset of cells in lymphoid tissues, heart and smooth muscle.	Expressed in heart.	Yang et al. (2000) concluded that this gene is necessary for blood vessel development and may be a possible target for drugs that control angiogenesis.	Mice homozygous for disruptions in this gene die as embryos before E11.5. vascular remodeling does not take place normally.	10700190
136	PRKCA	17:64306133:C:T	17	64306133	rs9909004	common	intron_variant		PRKCA	PRKCA		PRKCA	PRKCA - Protein Kinase C Alpha	Protein kinase C (PKC) is a family of serine- and threonine-specific protein kinases that can be activated by calcium and the second messenger diacylglycerol. PKC family members phosphorylate a wide variety of protein targets and are known to be involved in diverse cellular signaling pathways.	Yes	No	Hypercontractility caused by Prkca deletion protected against heart failure induced by pressure overload and against dilated cardiomyopathy induced by deleting the Csrp3 gene. Deletion of Prkca also rescued cardiomyopathy associated with overexpression of PP1. Braz et al. (2004) concluded that PKC-alpha functions as a nodal integrator of cardiac contractility by sensing intracellular Ca(2+) and s…	Homozygous null mice show no overt macroscopic abnormalities, however examination of one line revealed increased cardiac muscle contractility and protection against heart failure.	No	600824
137	CASKIN2*	17:73505172:A:G	17	73505172	rs7501873	common	intron_variant		KIAA0195,CASKIN2,TSEN54,LLGL2				CASKIN2 - CASK Interacting Protein 2	This gene encodes a large protein that contains six ankyrin repeats, as well as a Src homology 3 (SH3) domain and two sterile alpha motif (SAM) domains, which may be involved in protein-protein interactions.	Yes	Yes		No	No		KIAA0195 - Transmembrane Protein 94	KIAA0195 (Transmembrane Protein 94) is a Protein Coding gene.	Yes	Yes	No	No	No
138	AC100791.2	17:77781725:A:G	17	77781725	rs745570	common	upstream_gene_variant	17:77768654:A:C; missense_variant; CBX8	CBX8,RP11-353N14.1,AC100791.2,RP11-353N14.2	CBX8	TBC1D16		CBX8 - Chromobox 8	CBX8 (Chromobox 8) is a Protein Coding gene. Diseases associated with CBX8 include Conversion Disorder. Among its related pathways are SUMOylation and Metabolism of proteins.	Yes	Yes		Mice homozygous for a knock-out allele exhibit impaired MLL-AF9 transformation but are otherwise viable with normal haematopoiesis.	No
139	CDH2	18:26339589:C:G	18	26339589	rs11083300	common	intergenic_variant		ARIH2P1,RP11-510D21.1,RP11-510D21.2		CDH2	CDH2	CDH2 - Cadherin 2	This gene encodes a classical cadherin and member of the cadherin superfamily. Alternative splicing results in multiple transcript variants, at least one of which encodes a preproprotein is proteolytically processed to generate a calcium-dependent cell adhesion molecule and glycoprotein.	Yes	Yes		Homozygous mutation of this gene results in death by E10. Mutant embryos exhibit several developmental abnormalities such as growth retardation, an enlarged heart, distended pericardial sacs, abnormal heart tube, wavy neural tube, irregular somite shape, and abnormal embryo turning.	No		ARIH2P1 - Ariadne RBR E3 Ubiquitin Protein Ligase 2 Pseudogene 1	ARIH2P1 (Ariadne RBR E3 Ubiquitin Protein Ligase 2 Pseudogene 1) is a Pseudogene.	No	No	No	No	No
140	GAREM	18:30029141:C:T	18	30029141	rs982521	common	intron_variant		GAREM			GAREM	GAREM - GRB2 Associated Regulator Of MAPK1	This gene encodes an adaptor protein which functions in the epidermal growth factor (EGF) receptor-mediated signaling pathway. Multiple transcript variants encoding different isoforms have been found for this gene. Previously associated with PR interval, but not at genome-wide significance level.	Yes	No		No	No	25035420
141	DTNA	18:32399259:C:T	18	32399259	rs1786595	common	intron_variant		DTNA		DTNA	DTNA	DTNA - Dystrobrevin Alpha	This protein is a component of the dystrophin-associated protein complex (DPC), which consists of dystrophin and several integral and peripheral membrane proteins, including dystroglycans, sarcoglycans, syntrophins and alpha- and beta-dystrobrevin. The DPC localizes to the sarcolemma and its disruption is associated with various forms of muscular dystrophy.	Yes	Yes	Noncompaction of the left ventricle: primary cardiomyopathy with an elusive genetic etiology.	Homozygous targeted mutants exhibit skeletal and cardiac myopathies. Neuromuscular junctions appear to form normally, but their postnatal maturation is compromised. Dtna mutations do not increase the severity of Dmd or Utrn mutants whose products are also part of the dystrophin-glycoprotein complex. Phenotype and Functional Analyses in a Transgenic Mouse Model of Left Ventricular Noncompaction Ca…	Mutations in this gene are associated with left ventricular noncompaction with congenital heart defects.	29118297; 24036431; 18025927
142	CCBE1	18:57138957:C:T	18	57138957	rs12961264	common	intron_variant		CCBE1			CCBE1	CCBE1 - Collagen And Calcium Binding EGF Domains 1	This gene is thought to function in extracellular matrix remodelling and migration. It is predominantly expressed in the ovary, but down regulated in ovarian cancer cell lines and primary carcinomas, suggesting its role as a tumour suppressor.	No	No		No - Mice homozygous for a knock-out allele exhibit prenatal lethality associated with edema and absence of lymphatic vessels.	No
143	STK11	19:1217560:C:G	19	1217560	rs3795063	common	intron_variant		STK11,C19orf26,ATP5D			STK11	STK11 - Serine/Threonine Kinase 11	This gene, which encodes a member of the serine/threonine kinase family, regulates cell polarity and functions as a tumour suppressor.	Yes	Yes	Previous small scale GWAS study of Chagas cardiomyopathy in Trypanosoma cruzi seropositive subjects showed dome evidence of association with PR interval.	No - Targeted heterozygous mutants with one inactivated allele develop benign gastrointestinal polyps. Homozygous null mutant are embryonic lethal. Homozygotes for a hypomorphic allele survive and apparently normal, but male mice are infertile.	No	24324551	ATP5D - ATP Synthase F1 Subunit Delta	This gene encodes a subunit of mitochondrial ATP synthase. Mitochondrial ATP synthase catalyses ATP synthesis, utilizing an electrochemical gradient of protons across the inner membrane during oxidative phosphorylation. ATP synthase is composed of two linked multi-subunit complexes: the soluble catalytic core, F1, and the membrane-spanning component, Fo, comprising the proton channel.	Yes	Yes	No	In rats, modulation of ATP5D with notoginsenoside NR1 can protect against ischemia-reperfusion induced myocardial injury.	No	25306180
144	ZNF358	19:7581244:A:C	19	7581244	rs113394178	common	intron_variant		ZNF358	ZNF358		ZNF358	ZNF358 - Zinc Finger Protein 358	ZNF358 (Zinc Finger Protein 358) is a Protein Coding gene.	Yes	Yes		No	No
145	TMEM59L	19:18733355:G:T	19	18733355	rs111551996	common	downstream_gene_variant		C19orf60,KLHL26			CRLF1	TMEM59L - Transmembrane Protein 59 Like	This gene encodes a predicted type-I membrane glycoprotein. The encoded protein may play a role in functioning of the central nervous system.	No	No		No	No		REX1BD - Required For Excision 1-B Domain Containing	REX1BD (Required For Excision 1-B Domain Containing) is a Protein Coding gene.	Yes	Yes	No	No	No		KLHL26 - Kelch Like Family Member 26	KLHL26 (Kelch Like Family Member 26) is a Protein Coding gene. An important paralog of this gene is KLHL13.	Estimation of protein expression could not be performed.	No	None	No	No
146	RNF24	20:4031653:A:G	20	4031653	rs16989138	common	intergenic_variant		RNF24				RNF24 - Ring Finger Protein 24	This gene encodes an integral membrane protein that contains a RING-type zinc finger. The encoded protein may interact with multiple transient receptor potential cation channel subfamily C (TRPC) proteins and regulate the trafficking and insertion of these proteins into the plasma membrane.	Yes	Yes		No	No
147	KIAA1755	20:36832526:A:C	20	36832526	rs6023939	common	intergenic_variant		KIAA1755				Uncharacterized Protein KIAA1755	KIAA1755 is a Protein Coding gene. An important paralog of this gene is ARHGEF40. Influences heart rate in zebrafish.	Yes	Yes		No	No
148	DERL3	22:24183875:A:G	22	24183875	rs2070464	common	upstream_gene_variant		DERL3	MMP11		MMP11	DERL3 - Derlin 3	This protein appears to be involved in the degradation of misfolded glycoproteins in the ER. It is induced by ER stress in human cells.	Yes	Yes	ATF6 activates Derl3. Simulating ischemia activates Derl3 in cultured cardiomyocytes.	No	No	19940266
149	PHF5A	22:41854446:C:T	22	41854446	rs9607805	common	downstream_gene_variant		ZC3H7B,LOC100996598,TEF,TOB2,PHF5A,ACO2,POLR3H	L3MBTL2	TOB2	ZC3H7B, TEF,EP300, CSDC2	PHF5A - PHD Finger Protein 5A	The protein encoded by this gene contains a PHD-finger-like domain that is flanked by highly basic N- and C-termini. This protein belongs to the PHD-finger superfamily and may act as a chromatin-associated protein.	Yes	Yes		No	No	12234937	ZC3H7B - Zinc Finger CCCH-Type Containing 7B	This gene encodes a protein that contains a tetratricopeptide repeat domain. The encoded protein also interacts with the rotavirus non-structural protein NSP3.	No	Yes	No	No	No		TOB2 - Transducer Of ERBB2, 2	TOB2 is a Protein Coding gene. Diseases associated with TOB2 include Primary Hypomagnesemia. Among its related pathways are Signaling by BMP and De-adenylation-dependent mRNA decay.	Cytoplasmic expression in most tissues.	Yes	None	No	No
[truncated: 18 more columns]
