# Supplementary material for: Multi-ancestry GWAS of the electrocardiographic PR interval identifies 202 loci underlying cardiac conduction
Source: Nat Commun. 2020 May 21;11:2542. doi: 10.1038/s41467-020-15706-x (PMC7242331; doi:10.1038/s41467-020-15706-x)
Supplement: Supplementary file 23 — Supplementary Data 20 [file 41467_2020_15706_MOESM23_ESM.xlsx]

## Sheet: SD20 DEPICT tissue enrichment
Supplementary Data 20 DEPICT tissue and cell type enrichment results across PR interval associated loci.
Only results at 1% FDR from the analysis including both previously reported and not reported loci are presented.
FDR, False Discovery Rate; MeSH term, Medical Subject Heading term for the tissue or cell type annotation; Name, Tissue or cell type annotation; MeSH first level term, Description of the tissue or cell type annotation; MeSH second level term, More general description of the tissue or cell type annotation; previously reported and not reported P, Nominal enrichment P-value of tissue/cell type annot…
									Tissue-specific expression Z scores from the analysis across previously reported and not reported loci
MeSH term	Name	MeSH first level term	MeSH second level term	previously reported and not reported loci P	previously reported loci P	previously reported and not reported -log10(P)	previously reported loci -log10(P)	∆ -log10(P)	Gene 1	Gene 2	Gene 3	Gene 4	Gene 5	Gene 6	Gene 7	Gene 8	Gene 9	Gene 10
A07.541	Heart	Cardiovascular System	Heart	3.04e-11	0.000196	10.5171	3.70774	6.80938	NKX2-5 (6.6)	SCN5A (6.6)	SLC8A1 (6.2)	ADPRHL1 (5.5)	CHRM2 (5.3)	XIRP1 (5.2)	PDE3A (5.1)	TBX5 (5.0)	MYH7 (4.9)	TMEM182 (4.8)
A07.541.560	Heart Ventricles	Cardiovascular System	Heart	6.81e-11	0.000221	10.1669	3.65561	6.51125	SCN5A (7.3)	NKX2-5 (7.3)	SLC8A1 (7.0)	ADPRHL1 (6.1)	CHRM2 (5.9)	XIRP1 (5.8)	PDE3A (5.4)	MYH7 (5.4)	TMEM182 (5.2)	TBX5 (5.2)
A07.541.358	Heart Atria	Cardiovascular System	Heart	3.65e-08	0.00502	7.43771	2.2993	5.13841	MYH6 (7.1)	TBX5 (7.1)	SYNPO2L (5.5)	SCN5A (5.5)	NKX2-5 (5.3)	RYR2 (5.1)	RBPMS2 (4.8)	MYOCD (4.8)	SRL (4.7)	CCDC141 (4.7)
A07.541.358.100	Atrial Appendage	Cardiovascular System	Heart	1.61e-07	0.00743	6.79317	2.12901	4.66416	MYH6 (7.2)	TBX5 (7.1)	SYNPO2L (5.5)	SCN5A (5.3)	CCDC141 (5.2)	RYR2 (5.1)	NKX2-5 (5.0)	RBPMS2 (4.9)	MYOCD (4.8)	SRL (4.7)
A07.231.114	Arteries	Cardiovascular System	Blood Vessels	9.02e-06	0.00178	5.04479	2.74958	2.29521	PDE3A (3.3)	KCTD10 (2.2)	COL13A1 (2.2)	ARHGAP24 (2.2)	RUSC1-AS1 (2.0)	CDH13 (1.9)	HSPG2 (1.9)	FAM189B (1.9)	MYOCD (1.9)	FADS2 (1.8)
A10.165.114	Adipose Tissue	Tissues	Connective Tissue	0.000717	0.03	3.14448	1.52288	1.6216	WNT11 (3.9)	KCNIP2 (3.9)	PPP2R1B (3.8)	DPT (3.4)	CDKN2C (3.1)	SCN11A (2.9)	NMB (2.9)	SORBS1 (2.8)	ENSG00000237887 (2.7)	ENSG00000225399 (2.6)
A10.165.114.830	Adipose Tissue White	Tissues	Connective Tissue	0.000913	0.03	3.03953	1.52288	1.51665	KCNIP2 (4.4)	WNT11 (4.3)	PPP2R1B (4.0)	DPT (3.6)	SCN11A (3.5)	CDKN2C (3.4)	NMB (3.1)	SORBS1 (3.0)	ENSG00000237887 (2.9)	ENSG00000225399 (2.7)
A10.165.114.830.750	Subcutaneous Fat	Tissues	Connective Tissue	0.000913	0.03	3.03953	1.52288	1.51665	KCNIP2 (4.4)	WNT11 (4.3)	PPP2R1B (4.0)	DPT (3.6)	SCN11A (3.5)	CDKN2C (3.4)	NMB (3.1)	SORBS1 (3.0)	ENSG00000237887 (2.9)	ENSG00000225399 (2.7)
A10.165.114.830.500.750	Subcutaneous Fat Abdominal	Tissues	Connective Tissue	0.00153	0.05	2.81531	1.30103	1.51428	KCNIP2 (5.1)	PPP2R1B (4.7)	WNT11 (4.5)	DPT (3.7)	CDKN2C (3.6)	NMB (3.5)	SORBS1 (3.2)	SCN11A (3.0)	DFNB59 (2.9)	ENSG00000237887 (2.9)
A10.165.114.830.500	Abdominal Fat	Tissues	Connective Tissue	0.00153	0.05	2.81531	1.30103	1.51428	KCNIP2 (5.1)	PPP2R1B (4.7)	WNT11 (4.5)	DPT (3.7)	CDKN2C (3.6)	NMB (3.5)	SORBS1 (3.2)	SCN11A (3.0)	DFNB59 (2.9)	ENSG00000237887 (2.9)
A10.615.789	Serous Membrane	Tissues	Membranes	0.000258	0.25	3.58838	0.60206	2.98632	SEMA3D (2.4)	MMP11 (2.0)	NKD2 (1.9)	PDGFRL (1.8)	FGF18 (1.7)	CALHM3 (1.6)	ENSG00000237887 (1.6)	OPLAH (1.6)	THBS3 (1.5)	GJA5 (1.4)
A10.690	Muscles	Tissues	Muscles	0.000869	0.05	3.06098	1.30103	1.75995	MYOZ1 (4.9)	C20orf166 (4.9)	TRDN (4.6)	SYPL2 (4.5)	DUSP13 (4.5)	TTN (4.4)	C10orf71 (4.3)	OBSCN (4.2)	ENO3 (4.1)	SPEG (3.7)
A06.407.071	Adrenal Glands	Endocrine System	Endocrine Glands	0.000503	0.12	3.29843	0.920819	2.37761	CYP17A1 (8.6)	AS3MT (5.3)	TBX3 (4.5)	ENSG00000259134 (4.1)	ZNF503 (3.2)	C10orf11 (3.1)	GNPTG (3.0)	KLHDC8B (2.9)	ARHGEF40 (2.9)	MMAB (2.8)
A06.407.071.140	Adrenal Cortex	Endocrine System	Endocrine Glands	0.000396	0.1	3.4023	1	2.4023	CYP17A1 (10.3)	AS3MT (5.7)	TBX3 (5.0)	ENSG00000259134 (4.4)	C10orf11 (3.8)	GNPTG (3.4)	ZNF503 (3.4)	ARHGEF40 (3.2)	ITGA9 (3.2)	KLHDC8B (3.1)
A03.556.875	Upper Gastrointestinal Tract	Digestive System	Gastrointestinal Tract	0.000899	0.17	3.04624	0.769551	2.27669	MUC1 (2.1)	SLC9A2 (2.1)	MYOCD (2.0)	DES (2.0)	FSIP2 (1.9)	TCF21 (1.9)	DPT (1.6)	TESC (1.6)	RBPMS (1.5)	SLC12A7 (1.5)
A05.360	Genitalia	Urogenital System	Genitalia	0.00137	0.09	2.86328	1.04576	1.81752	MEIS1 (1.5)	WT1-AS (1.5)	FSIP2 (1.5)	MPPED2 (1.5)	ENSG00000249816 (1.3)	FGF18 (1.3)	ENSG00000226747 (1.2)	RUSC1-AS1 (1.2)	EMILIN3 (1.2)	TCF21 (1.2)
A05.360.319.679.690	Myometrium	Urogenital System	Genitalia	0.000348	0.00124	3.45842	2.90658	0.551842	MYOCD (4.3)	ENSG00000237125 (4.3)	DES (4.0)	WT1-AS (4.0)	PLN (3.1)	THBS3 (2.7)	RBPMS (2.6)	ST13 (2.5)	ENTPD1 (2.5)	MEIS1 (2.5)
