# Supplementary material for: Multi-ancestry GWAS of the electrocardiographic PR interval identifies 202 loci underlying cardiac conduction
Source: Nat Commun. 2020 May 21;11:2542. doi: 10.1038/s41467-020-15706-x (PMC7242331; doi:10.1038/s41467-020-15706-x)
Supplement: Supplementary file 24 — Supplementary Data 21 [file 41467_2020_15706_MOESM24_ESM.xlsx]

## Sheet: SD21 DEPICT geneset enrichment
Supplementary Data 21 DEPICT geneset enrichment results across PR interval associated loci.
Results are shown for GO categories, mouse knockout phenotypes, protein-protein interaction subnetworks, KEGG and REACTOME pathways separately, and only at FDR <0.01 from the analysis including both previously reported and not reported loci. In the analysis including all PR interval associated loci we found enrichment across 302 GO categories, 289 mouse knockout phenotypes, 453 protein-protein in…
GO, Gene ontology; KEGG, Kyoto encyclopedia of genes and genomes; GO, Gene Ontology; FDR, False discovery rate; Original gene set ID, Identifier of the predefined gene set; Original gene set description, Description of the predefined gene set; previously reported and not reported P, Nominal enrichment P-value of the reconstituted gene set from the analysis across both previously reported and not …
												LIM Domain Binding 3
								Reconstituted gene set Z scores from the analysis across previously reported and not reported loci
Original geneset ID	Original geneset description	previously reported and not reported loci P	previously reported loci P	previously reported loci FDR	previously reported and not reported loci -log10(P)	previously reported loci -log10(P)	∆ -log10(P)	Gene 1	Gene 2	Gene 3	Gene 4	Gene 5	Gene 6	Gene 7	Gene 8	Gene 9	Gene 10
GO categories
GO:0007507	heart development	1.87e-15	4.35e-06	<0.01	14.7282	5.36151	9.36665	TBX20 (6.4)	NKX2-5 (4.8)	TMEM182 (4.4)	GJA5 (4.3)	ADPRHL1 (4.1)	SCN5A (4.0)	TBX5 (3.9)	MYOCD (3.8)	HCN4 (3.7)	MYH6 (3.7)
GO:0030036	actin cytoskeleton organization	2.2e-15	4.32e-05	<0.01	14.6576	4.36452	10.2931	FHL2 (3.7)	PDLIM5 (3.3)	TES (3.3)	KCTD10 (3.3)	CTTNBP2NL (3.2)	C1orf98 (3.1)	ENSG00000230627 (3.1)	SPEG (3.1)	SH3BGRL3 (3.0)	MACF1 (3.0)
GO:0048738	cardiac muscle tissue development	6.26e-14	0.000172	<0.01	13.2034	3.76447	9.43895	TBX20 (6.7)	ADPRHL1 (6.3)	TMEM182 (6.1)	SCN5A (5.8)	NKX2-5 (5.7)	MYOCD (5.0)	MYH6 (4.9)	RYR2 (4.8)	CEFIP (4.7)	SLC8A1 (4.3)
GO:0055007	cardiac muscle cell differentiation	1.51e-13	0.000651	<0.05	12.821	3.18642	9.6346	TBX20 (5.8)	ADPRHL1 (5.7)	TMEM182 (5.2)	SCN5A (4.8)	NKX2-5 (4.7)	CCDC141 (4.5)	WT1-AS (4.0)	RYR2 (3.9)	CEFIP (3.9)	MYH6 (3.8)
GO:0005924	cell-substrate adherens junction	2.79e-13	5.09e-06	<0.01	12.5544	5.29328	7.26111	RBPMS (5.4)	RBPMS2 (5.4)	PDLIM5 (5.3)	CAV2 (5.0)	PHLDB2 (4.9)	FERMT2 (4.7)	FHL2 (4.7)	HSPG2 (4.6)	CAV1 (4.3)	PLEC (4.2)
GO:0003007	heart morphogenesis	3.46e-13	5.58e-05	<0.01	12.4609	4.25337	8.20756	TBX20 (5.9)	NKX2-5 (4.2)	TMEM182 (3.8)	SCN5A (3.8)	HCN4 (3.7)	ADPRHL1 (3.5)	GJA5 (3.5)	MYH6 (3.4)	TBX5 (3.4)	OBSL1 (3.2)
GO:0051146	striated muscle cell differentiation	3.53e-13	7.06e-05	<0.01	12.4522	4.1512	8.30103	ADPRHL1 (5.2)	SCN5A (5.1)	TMEM182 (5.0)	CEFIP (4.8)	C20orf166 (4.6)	CCDC141 (4.5)	PITX3 (4.5)	TBX20 (4.5)	CHRNE (4.3)	CORO6 (4.2)
GO:0035051	cardiac cell differentiation	4.21e-13	0.000912	<0.05	12.3757	3.04001	9.33571	TBX20 (5.9)	ADPRHL1 (5.0)	NKX2-5 (4.7)	SCN5A (4.4)	TMEM182 (4.3)	CCDC141 (3.9)	ALPK3 (3.8)	CEFIP (3.7)	KLHDC8B (3.7)	RYR2 (3.6)
GO:0003206	cardiac chamber morphogenesis	6.75e-13	0.000119	<0.01	12.1707	3.92445	8.24624	TBX20 (6.8)	NKX2-5 (5.1)	RYR2 (4.6)	ADPRHL1 (4.6)	SCN5A (4.5)	TMEM182 (4.5)	TBX5 (4.4)	SLC27A6 (4.1)	CCDC141 (3.9)	MYH6 (3.9)
GO:0030029	actin filament-based process	7.99e-13	0.000187	<0.01	12.0975	3.72816	8.36929	SRL (4.5)	ENO3 (4.2)	MYOZ1 (4.1)	SYPL2 (4.1)	PDLIM5 (4.1)	OBSCN (4.0)	TRDN (3.9)	C20orf166 (3.7)	CRYAB (3.5)	DUSP13 (3.5)
GO:0042692	muscle cell differentiation	2.63e-12	1.79e-05	<0.01	11.58	4.74715	6.8329	PITX3 (5.7)	C20orf166 (4.9)	TMEM182 (4.6)	CEFIP (4.3)	TBX20 (4.0)	PPAPDC3 (4.0)	OBSL1 (4.0)	DUSP13 (3.9)	CCDC141 (3.9)	ADPRHL1 (3.9)
GO:0060537	muscle tissue development	2.75e-12	6.3e-05	<0.01	11.5607	4.20066	7.36001	PITX3 (5.0)	TMEM182 (5.0)	CEFIP (4.6)	ADPRHL1 (4.5)	C20orf166 (4.5)	SCN5A (4.4)	CORO6 (4.4)	ALPK3 (4.2)	SYPL2 (4.2)	OBSL1 (4.0)
GO:0043034	costamere	2.87e-12	3.16e-07	<0.01	11.5421	6.50031	5.04181	DES (8.3)	PLN (5.7)	MYOCD (5.6)	SORBS1 (5.0)	SPEG (5.0)	RBPMS2 (5.0)	RBPMS (4.8)	ITGB1 (4.4)	SLC8A1 (4.1)	SSPN (4.0)
GO:0014706	striated muscle tissue development	4.57e-12	0.00014	<0.01	11.3401	3.85387	7.48621	PITX3 (5.4)	TMEM182 (5.1)	ADPRHL1 (4.8)	CEFIP (4.7)	C20orf166 (4.6)	CORO6 (4.6)	SCN5A (4.5)	SYPL2 (4.3)	ALPK3 (4.3)	PPAPDC3 (4.2)
GO:0003205	cardiac chamber development	5.56e-12	0.000222	<0.05	11.2549	3.65365	7.60128	TBX20 (7.0)	NKX2-5 (4.9)	TBX5 (4.6)	RYR2 (4.5)	SCN5A (4.5)	TMEM182 (4.5)	ADPRHL1 (4.1)	MYH6 (3.8)	CCDC141 (3.8)	SLC27A6 (3.8)
GO:0005912	adherens junction	5.97e-12	2.98e-06	<0.01	11.224	5.52578	5.69824	PDLIM5 (5.4)	DSP (5.4)	PHLDB2 (5.0)	RBPMS (5.0)	FERMT2 (4.8)	CAV2 (4.6)	FAT1 (4.6)	HSPG2 (4.5)	FHL2 (4.4)	PLEC (4.3)
GO:0030055	cell-substrate junction	7.99e-12	1.31e-05	<0.01	11.0975	4.88273	6.21472	PDLIM5 (5.3)	CAV2 (5.1)	RBPMS2 (5.1)	RBPMS (5.1)	PHLDB2 (4.8)	HSPG2 (4.7)	FHL2 (4.7)	PLEC (4.6)	FERMT2 (4.4)	CAV1 (4.4)
GO:0061061	muscle structure development	1.74e-11	0.000171	<0.01	10.7595	3.767	6.99245	PITX3 (6.5)	C20orf166 (6.0)	SYPL2 (5.5)	CEFIP (5.1)	CORO6 (4.9)	TMEM182 (4.9)	DUSP13 (4.9)	PPAPDC3 (4.7)	ADPRHL1 (4.5)	DES (4.3)
GO:0003231	cardiac ventricle development	7.1e-11	0.000458	<0.05	10.1487	3.33913	6.80961	TBX20 (6.8)	NKX2-5 (5.2)	TMEM182 (4.6)	RYR2 (4.6)	SCN5A (4.4)	ADPRHL1 (4.3)	TBX5 (4.3)	MYH6 (4.0)	SLC8A1 (3.8)	CCDC141 (3.7)
GO:0042641	actomyosin	8.01e-11	0.00011	<0.01	10.0964	3.95861	6.13776	FHL2 (6.1)	DES (6.0)	SPEG (5.0)	PDLIM5 (4.8)	PLN (4.7)	FERMT2 (4.3)	RBPMS2 (4.3)	LDB3 (4.2)	MYOCD (4.1)	CAMK2G (4.0)
GO:0005925	focal adhesion	8.46e-11	5.18e-05	<0.01	10.0726	4.28567	5.78696	RBPMS (5.5)	CAV2 (5.2)	PHLDB2 (5.1)	RBPMS2 (5.0)	PDLIM5 (4.9)	FERMT2 (4.8)	HSPG2 (4.7)	FHL2 (4.4)	CAV1 (4.3)	PLEC (4.1)
GO:0055001	muscle cell development	9.5e-11	0.000318	<0.05	10.0223	3.49757	6.5247	ADPRHL1 (5.6)	SCN5A (5.3)	CEFIP (5.3)	CCDC141 (5.3)	CORO6 (5.2)	TMEM182 (5.0)	C20orf166 (5.0)	SYPL2 (4.6)	SRL (4.6)	PPAPDC3 (4.6)
GO:0003279	cardiac septum development	1.92e-10	0.000378	<0.05	9.7167	3.42251	6.29419	TBX20 (4.2)	HCN4 (3.5)	SCN5A (3.4)	ENSG00000176354 (3.4)	ENSG00000231064 (3.2)	C11orf9 (3.1)	WNT11 (3.1)	ID2 (3.1)	ZFPM1 (3.0)	ENSG00000230627 (2.8)
GO:0070161	anchoring junction	2.15e-10	1.28e-05	<0.01	9.66756	4.89279	4.77477	DSP (6.8)	PDLIM5 (5.1)	PHLDB2 (4.9)	RBPMS (4.7)	CAV2 (4.6)	FAT1 (4.5)	FERMT2 (4.3)	COL17A1 (4.2)	HSPG2 (4.2)	PLEC (4.2)
GO:0055002	striated muscle cell development	2.34e-10	0.000331	<0.05	9.63078	3.48017	6.15061	ADPRHL1 (5.5)	CORO6 (5.4)	SCN5A (5.4)	TMEM182 (5.3)	CEFIP (5.2)	CCDC141 (5.1)	C20orf166 (4.9)	SYPL2 (4.7)	SRL (4.6)	PPAPDC3 (4.6)
GO:0060411	cardiac septum morphogenesis	2.34e-10	0.000603	<0.05	9.63078	3.21968	6.4111	HCN4 (3.5)	SCN5A (3.4)	ZNF358 (3.3)	ZFPM1 (3.1)	C11orf9 (3.0)	TBX20 (2.9)	ID2 (2.9)	WNT11 (2.8)	SLC27A6 (2.7)	ENSG00000250107 (2.7)
GO:0015629	actin cytoskeleton	2.41e-10	0.000108	<0.01	9.61798	3.96658	5.65141	TTN (8.2)	TRDN (8.1)	MYOZ1 (8.1)	ENO3 (7.9)	SRL (7.3)	LDB3 (7.1)	MYH7 (6.9)	SYNPO2L (6.7)	DES (6.6)	PDLIM5 (6.2)
GO:0032432	actin filament bundle	2.89e-10	0.000945	<0.05	9.5391	3.02457	6.51453	FHL2 (6.3)	DES (5.4)	PLN (4.9)	PDLIM5 (4.9)	SPEG (4.8)	PHLDB2 (4.3)	FERMT2 (4.2)	LDB3 (4.0)	RBPMS (3.9)	RBPMS2 (3.9)
GO:0001725	stress fiber	2.93e-10	0.000561	<0.05	9.53313	3.25104	6.2821	FHL2 (6.1)	DES (5.4)	SPEG (5.0)	PDLIM5 (4.9)	PLN (4.7)	PHLDB2 (4.4)	FERMT2 (4.3)	ITGB1 (4.1)	RBPMS (4.0)	RBPMS2 (4.0)
GO:0005916	fascia adherens	6.71e-10	1.86e-06	<0.01	9.17328	5.73049	3.44279	CEFIP (5.2)	SORBS1 (5.0)	PDLIM5 (4.7)	ITGB1 (4.7)	RYR2 (4.6)	LDB3 (4.5)	ADPRHL1 (4.5)	SCN5A (4.4)	SPTBN1 (4.3)	TMEM182 (4.2)
GO:0055006	cardiac cell development	7.45e-10	0.00357	<0.20	9.12784	2.44733	6.68051	ADPRHL1 (6.3)	TBX20 (5.3)	TMEM182 (5.0)	SCN5A (4.6)	NKX2-5 (4.6)	CCDC141 (4.6)	RYR2 (4.5)	CEFIP (4.4)	MYH6 (4.4)	CORO6 (4.3)
GO:0055013	cardiac muscle cell development	7.45e-10	0.00357	<0.20	9.12784	2.44733	6.68051	ADPRHL1 (6.3)	TBX20 (5.3)	TMEM182 (5.0)	SCN5A (4.6)	NKX2-5 (4.6)	CCDC141 (4.6)	RYR2 (4.5)	CEFIP (4.4)	MYH6 (4.4)	CORO6 (4.3)
GO:0031032	actomyosin structure organization	1.06e-09	0.000282	<0.05	8.97469	3.54975	5.42494	ADPRHL1 (5.8)	PLN (5.4)	TMEM182 (5.3)	CEFIP (5.3)	MYOCD (5.1)	CORO6 (5.0)	OBSCN (5.0)	SRL (4.9)	TBX20 (4.7)	XIRP1 (4.7)
GO:0048634	regulation of muscle organ development	2.3e-09	0.00024	<0.05	8.63827	3.61979	5.01848	SCN5A (3.8)	CHRNE (3.6)	TBX20 (3.1)	CCDC141 (3.1)	PITX3 (2.9)	ENSG00000226688 (2.8)	ENSG00000231064 (2.8)	TBX5 (2.8)	NFIA (2.7)	NKX2-5 (2.6)
GO:0035295	tube development	2.45e-09	8.24e-05	<0.01	8.61083	4.08407	4.52676	DCBLD1 (3.3)	GJA5 (3.3)	ZNF503 (3.2)	FGF18 (3.2)	COL13A1 (3.1)	TBX3 (3.1)	NKD2 (3.1)	WNT11 (3.1)	IRX3 (2.9)	TCF21 (2.8)
GO:0007178	transmembrane receptor protein serine/threonine kinase signaling pathway	2.55e-09	2.96e-05	<0.01	8.59346	4.52871	4.06475	TBX5 (3.3)	PRKAB2 (3.2)	PHLDB2 (3.1)	ID2 (3.0)	WNT11 (2.9)	FGF8 (2.9)	FLRT2 (2.8)	GJA5 (2.8)	MYOCD (2.8)	ZFPM1 (2.8)
GO:0030239	myofibril assembly	2.66e-09	0.000812	<0.05	8.57512	3.09044	5.48467	ADPRHL1 (6.5)	TMEM182 (6.0)	CEFIP (5.8)	OBSCN (5.4)	PLN (5.3)	SRL (5.3)	TBX20 (5.3)	CORO6 (5.2)	XIRP1 (5.1)	MYH6 (5.0)
GO:0048514	blood vessel morphogenesis	2.93e-09	0.00491	<0.20	8.53313	2.30892	6.22421	TMEM204 (4.2)	HSPG2 (4.1)	PODXL (4.0)	COL13A1 (3.6)	EPAS1 (3.4)	DLC1 (3.3)	CAV1 (3.1)	CDH13 (3.1)	ARHGEF40 (3.1)	ITGA9 (3.0)
GO:0001944	vasculature development	3.06e-09	0.00391	<0.20	8.51428	2.40782	6.10646	TMEM204 (4.1)	HSPG2 (4.1)	PODXL (4.1)	COL13A1 (3.9)	EPAS1 (3.3)	DLC1 (3.2)	GJA1 (3.2)	FGF18 (3.2)	ENSG00000249816 (3.2)	GJA5 (3.0)
GO:0007517	muscle organ development	3.19e-09	0.000626	<0.05	8.49621	3.20343	5.29278	PITX3 (6.8)	C20orf166 (5.9)	SYPL2 (5.6)	CORO6 (5.0)	CEFIP (5.0)	DUSP13 (4.9)	TMEM182 (4.7)	ADPRHL1 (4.4)	PPAPDC3 (4.3)	ALPK3 (4.3)
GO:0022603	regulation of anatomical structure morphogenesis	3.52e-09	0.0084	<0.20	8.45346	2.07572	6.37774	ENSG00000231437 (3.4)	ARHGEF40 (3.2)	DLC1 (3.1)	FGF18 (2.8)	WNT9A (2.8)	FLRT2 (2.7)	NAV2 (2.6)	ZNF683 (2.6)	PHLDB2 (2.6)	ZFPM2 (2.6)
GO:0003779	actin binding	3.54e-09	0.000171	<0.01	8.451	3.767	4.68399	MYOZ1 (7.3)	TRDN (6.8)	TTN (6.5)	SRL (6.3)	ENO3 (6.2)	LDB3 (6.1)	DES (6.0)	MYH7 (5.6)	SYNPO2L (5.5)	PDLIM5 (5.5)
GO:0051153	regulation of striated muscle cell differentiation	3.54e-09	0.000477	<0.05	8.451	3.32148	5.12952	SCN5A (3.6)	NFIA (3.5)	TESC (3.3)	ADPRHL1 (3.2)	PAM (2.9)	PITX3 (2.9)	TBX5 (2.9)	TBX20 (2.8)	NAV2 (2.7)	TMEM182 (2.6)
GO:0030018	Z disc	3.78e-09	2.95e-05	<0.01	8.42251	4.53018	3.89233	LDB3 (9.6)	TTN (9.3)	SYNPO2L (9.1)	XIRP1 (9.0)	TRDN (8.7)	SRL (8.5)	CEFIP (8.4)	MYH7 (8.2)	DES (8.2)	MYOZ1 (8.1)
GO:0003281	ventricular septum development	4.23e-09	0.000915	<0.05	8.37366	3.03858	5.33508	ENSG00000231064 (3.8)	TBX20 (3.8)	ATXN7L2 (3.2)	ID2 (3.2)	ENSG00000226688 (3.1)	ENSG00000226747 (2.9)	HCN4 (2.9)	ARHGEF40 (2.8)	MMP11 (2.8)	LINC00477 (2.7)
GO:0060048	cardiac muscle contraction	4.32e-09	6.99e-05	<0.01	8.36452	4.15552	4.20899	TMEM182 (6.0)	ADPRHL1 (5.8)	SCN5A (5.3)	MYH6 (4.6)	NKX2-5 (4.6)	SLC8A1 (4.3)	SRL (4.3)	CEFIP (4.2)	OBSCN (4.2)	CORO6 (4.1)
GO:0016202	regulation of striated muscle tissue development	4.58e-09	0.000383	<0.05	8.33913	3.4168	4.92233	CHRNE (3.8)	SCN5A (3.5)	CCDC141 (3.2)	TBX20 (3.2)	TBX5 (2.9)	BEND5 (2.9)	ENSG00000226688 (2.9)	NFIA (2.9)	ENSG00000231064 (2.8)	NKX2-5 (2.7)
GO:0003208	cardiac ventricle morphogenesis	5.91e-09	0.00267	<0.20	8.22841	2.57349	5.65492	TBX20 (6.9)	NKX2-5 (5.7)	TMEM182 (5.4)	ADPRHL1 (5.3)	RYR2 (5.1)	SCN5A (4.8)	MYH6 (4.5)	PLN (4.4)	SLC8A1 (4.2)	SLC27A6 (4.1)
GO:0005913	cell-cell adherens junction	6.61e-09	1.3e-05	<0.01	8.1798	4.88606	3.29374	DSP (5.7)	FAT1 (5.5)	DAG1 (4.2)	LAMB2 (4.1)	FERMT2 (3.9)	ITGAV (3.9)	PDLIM5 (3.9)	SPTBN1 (3.8)	PHLDB2 (3.7)	MACF1 (3.5)
GO:0001568	blood vessel development	9.17e-09	0.0058	<0.20	8.03763	2.23657	5.80106	TMEM204 (4.3)	HSPG2 (4.2)	PODXL (4.1)	COL13A1 (3.9)	EPAS1 (3.4)	DLC1 (3.3)	GJA1 (3.2)	GJA5 (2.9)	HLX (2.9)	CAV1 (2.9)
GO:0044291	cell-cell contact zone	1.22e-08	3.49e-06	<0.01	7.91364	5.45717	2.45647	CEFIP (5.1)	CORO6 (4.9)	SORBS1 (4.8)	AKAP6 (4.7)	LDB3 (4.6)	RYR2 (4.6)	ADPRHL1 (4.5)	SRL (4.4)	NKX2-5 (4.3)	SLC8A1 (4.3)
GO:0055003	cardiac myofibril assembly	1.39e-08	0.00787	<0.20	7.85699	2.10403	5.75296	ADPRHL1 (6.0)	TMEM182 (5.6)	PPAPDC3 (4.9)	CCDC141 (4.8)	CEFIP (4.4)	ALPK3 (4.3)	MYH7 (4.3)	MYH6 (4.3)	XIRP1 (4.2)	SCN5A (4.2)
GO:0060070	canonical Wnt receptor signaling pathway	1.89e-08	0.00132	<0.20	7.72354	2.87943	4.84411	ENSG00000250107 (3.4)	ENSG00000235257 (3.3)	NKD2 (3.2)	FREM2 (3.1)	ZNF358 (3.0)	TBX20 (3.0)	FGF8 (2.9)	FGFR1 (2.8)	MSX2 (2.8)	SH3PXD2A (2.8)
GO:0000988	protein binding transcription factor activity	2.29e-08	0.01	<0.20	7.64016	2	5.64016	SSBP3 (4.1)	KIAA0913 (3.8)	TOB2 (3.7)	YY1AP1 (3.6)	RELA (3.3)	SMARCB1 (3.3)	ZNF358 (3.3)	ZNF609 (3.3)	ARID2 (3.2)	EP300 (3.2)
GO:0033002	muscle cell proliferation	2.66e-08	0.000383	<0.05	7.57512	3.4168	4.15832	GJA5 (3.4)	MYOCD (3.4)	NKX2-5 (2.9)	ST7-AS1 (2.7)	TBX5 (2.7)	SLC8A1 (2.5)	PODXL (2.5)	ZFPM2 (2.5)	GBAP1 (2.5)	OPN4 (2.5)
GO:0090092	regulation of transmembrane receptor protein serine/threonine kinase signaling pathway	2.88e-08	0.000736	<0.05	7.54061	3.13312	4.40749	PHLDB2 (3.6)	GJA5 (3.2)	TBX5 (3.1)	WNT11 (3.0)	MYOCD (2.9)	IRX3 (2.8)	ID2 (2.6)	PDE3A (2.6)	FLRT2 (2.6)	FGF18 (2.6)
GO:0014704	intercalated disc	3.32e-08	4.48e-06	<0.01	7.47886	5.34872	2.13014	CEFIP (5.6)	CORO6 (5.2)	AKAP6 (5.0)	ADPRHL1 (4.8)	RYR2 (4.8)	SORBS1 (4.7)	LDB3 (4.7)	SRL (4.6)	SLC8A1 (4.6)	OBSCN (4.5)
GO:0045214	sarcomere organization	4.66e-08	0.0015	<0.20	7.33161	2.82391	4.50771	ADPRHL1 (6.7)	TBX20 (5.9)	SCN5A (5.5)	TMEM182 (5.4)	CEFIP (5.1)	NKX2-5 (4.9)	OBSCN (4.6)	RYR2 (4.6)	TBX5 (4.5)	CCDC141 (4.4)
GO:0048729	tissue morphogenesis	5.05e-08	0.0005	<0.05	7.29671	3.30103	3.99568	FGF8 (3.5)	IRX3 (3.3)	FREM2 (3.2)	TBX5 (3.2)	NKD2 (3.0)	WNT11 (3.0)	SLC12A7 (2.9)	TBX3 (2.9)	COL13A1 (2.8)	PHLDB2 (2.8)
GO:0032970	regulation of actin filament-based process	5.79e-08	0.02	<0.20	7.23732	1.69897	5.53835	ENSG00000253932 (3.5)	SH3BGRL3 (3.3)	ENSG00000249816 (3.0)	ENSG00000238018 (2.7)	PRKCZ (2.7)	C1orf98 (2.7)	NPM2 (2.6)	STRN (2.6)	RHOA (2.5)	FHL2 (2.5)
GO:0003013	circulatory system process	6.04e-08	0.0018	<0.20	7.21896	2.74473	4.47424	SLC8A1 (5.3)	ADPRHL1 (5.2)	PDE3A (4.8)	SCN5A (4.7)	TBX20 (4.6)	ADRB1 (4.3)	NKX2-5 (4.1)	PLN (4.0)	OPN4 (3.9)	TBX5 (3.9)
GO:0003015	heart process	6.38e-08	0.00018	<0.01	7.19518	3.74473	3.45045	SCN5A (7.1)	ADPRHL1 (6.7)	SLC8A1 (5.7)	TMEM182 (5.3)	RYR2 (5.2)	NKX2-5 (4.9)	MYH6 (4.7)	PAM (4.5)	CEFIP (4.5)	CORO6 (4.4)
GO:0060047	heart contraction	7.98e-08	0.000193	<0.01	7.098	3.71444	3.38355	SCN5A (7.1)	ADPRHL1 (6.7)	SLC8A1 (5.6)	TMEM182 (5.3)	RYR2 (5.2)	NKX2-5 (4.9)	MYH6 (4.6)	PAM (4.5)	ALPK3 (4.5)	CEFIP (4.4)
GO:0000989	transcription factor binding transcription factor activity	8.44e-08	0.01	<0.20	7.07366	2	5.07366	SSBP3 (4.1)	TOB2 (3.8)	KIAA0913 (3.7)	YY1AP1 (3.6)	ZNF609 (3.4)	SMARCB1 (3.4)	EP300 (3.3)	ZNF358 (3.2)	RELA (3.2)	ARID2 (3.2)
GO:0008015	blood circulation	9.28e-08	0.00227	<0.20	7.03245	2.64397	4.38848	SLC8A1 (5.3)	ADPRHL1 (5.2)	PDE3A (4.8)	SCN5A (4.6)	TBX20 (4.5)	ADRB1 (4.3)	NKX2-5 (4.1)	PLN (4.0)	TBX5 (3.9)	OPN4 (3.9)
GO:0051018	protein kinase A binding	1.13e-07	0.00042	<0.05	6.94692	3.37675	3.57017	TBX5 (4.7)	MYH6 (3.9)	FGF12 (3.7)	SCN5A (3.6)	ENSG00000238018 (3.3)	TBX20 (3.2)	SLC8A1 (3.2)	SPATC1 (3.0)	PLN (3.0)	ADRB1 (3.0)
GO:0035239	tube morphogenesis	1.14e-07	0.000742	<0.05	6.9431	3.1296	3.8135	FGF8 (3.6)	COL13A1 (3.2)	FREM2 (3.1)	DCBLD1 (3.1)	IRX3 (3.0)	GJA5 (2.9)	TBX3 (2.9)	DFNB59 (2.9)	MMP11 (2.9)	NKD2 (2.9)
GO:0003714	transcription corepressor activity	1.18e-07	0.15	<0.20	6.92812	0.823909	6.10421	ID2 (4.5)	CSRNP1 (4.0)	ZNF358 (4.0)	NFIA (3.8)	ZMIZ1 (3.2)	SSBP3 (3.1)	TSC22D2 (3.1)	ZFPM1 (3.0)	TOB2 (3.0)	KIAA0913 (3.0)
GO:0070482	response to oxygen levels	1.2e-07	0.000125	<0.01	6.92082	3.90309	3.01773	FUT11 (3.3)	EPAS1 (3.0)	FBXO32 (2.9)	NCKIPSD (2.8)	EMILIN3 (2.7)	EDN2 (2.6)	GJA5 (2.6)	OPN4 (2.6)	IBA57 (2.5)	WNT9A (2.5)
GO:0008134	transcription factor binding	1.3e-07	0.00571	<0.20	6.88606	2.24336	4.64269	EP300 (4.2)	FOXP1 (3.8)	TLE3 (3.6)	ZMIZ1 (3.5)	ZNF592 (3.3)	SKI (3.3)	ZNF609 (3.2)	LDB1 (3.2)	ID2 (3.1)	TBX3 (3.1)
GO:0055008	cardiac muscle tissue morphogenesis	1.42e-07	0.00328	<0.20	6.84771	2.48413	4.36359	TBX20 (6.3)	ADPRHL1 (5.7)	TMEM182 (5.4)	NKX2-5 (5.0)	MYH6 (4.8)	MYH7 (4.7)	CEFIP (4.5)	SCN5A (4.4)	RYR2 (4.3)	ALPK3 (4.2)
GO:0031674	I band	1.46e-07	6.71e-05	<0.01	6.83565	4.17328	2.66237	TTN (10.5)	LDB3 (10.3)	TRDN (10.2)	MYOZ1 (9.8)	SYNPO2L (9.5)	MYH7 (9.4)	XIRP1 (9.4)	SRL (9.3)	CEFIP (9.2)	ENO3 (8.7)
GO:0019900	kinase binding	1.8e-07	0.01	<0.20	6.74473	2	4.74473	LIMD2 (3.7)	SSH2 (3.4)	CAMK2D (3.2)	MGEA5 (3.2)	SKI (3.1)	MAP3K3 (3.0)	PRKCA (2.9)	SPTBN1 (2.7)	CDKN2C (2.7)	SBNO2 (2.7)
GO:0030509	BMP signaling pathway	1.96e-07	0.000479	<0.05	6.70774	3.31966	3.38808	FGF8 (3.5)	TBX5 (3.4)	ENSG00000231064 (3.4)	FLRT2 (3.3)	ID2 (3.2)	BMPR1A (2.9)	WNT11 (2.7)	MAP3K3 (2.7)	TBX20 (2.6)	NKX2-5 (2.6)
GO:0019901	protein kinase binding	2.03e-07	0.02	<0.20	6.6925	1.69897	4.99353	SKI (3.7)	SSH2 (3.6)	LIMD2 (3.5)	CAMK2D (3.1)	C6orf204 (3.0)	MGEA5 (2.9)	PRKCA (2.9)	MAP3K3 (2.9)	SBNO2 (2.8)	TSC22D2 (2.8)
GO:0001666	response to hypoxia	2.11e-07	0.000338	<0.05	6.67572	3.47108	3.20463	FUT11 (3.3)	FBXO32 (3.1)	EDN2 (3.0)	EPAS1 (2.9)	OPN4 (2.9)	NCKIPSD (2.9)	IBA57 (2.9)	SIPA1L2 (2.8)	EMILIN3 (2.8)	DNAH11 (2.6)
GO:0008016	regulation of heart contraction	2.49e-07	0.000417	<0.05	6.6038	3.37986	3.22394	SCN5A (6.8)	ADPRHL1 (6.0)	SLC8A1 (5.7)	RYR2 (5.2)	PAM (4.4)	NKX2-5 (4.3)	ADRB1 (4.3)	TBX5 (4.2)	TMEM182 (4.1)	TBX20 (4.1)
GO:0003229	ventricular cardiac muscle tissue development	3.11e-07	0.02	<0.20	6.50724	1.69897	4.80827	TBX20 (6.6)	NKX2-5 (6.3)	ADPRHL1 (6.1)	TMEM182 (5.6)	RYR2 (5.4)	SCN5A (5.4)	MYH6 (4.9)	SLC8A1 (4.8)	SLC27A6 (4.7)	MYH7 (4.5)
GO:0003712	transcription cofactor activity	3.26e-07	0.02	<0.20	6.48678	1.69897	4.78781	SSBP3 (4.1)	KIAA0913 (3.8)	YY1AP1 (3.7)	TOB2 (3.6)	SMARCB1 (3.5)	ZNF609 (3.4)	ARID2 (3.4)	EP300 (3.4)	ZNF358 (3.1)	RELA (3.1)
GO:0030334	regulation of cell migration	4.01e-07	0.00514	<0.20	6.39686	2.28904	4.10782	GJA1 (3.3)	DLC1 (3.2)	PHLDB2 (3.2)	ITGA9 (3.1)	TMEM204 (3.1)	CCBE1 (3.1)	CAV1 (3.1)	EPAS1 (3.0)	GJA5 (2.9)	ENSG00000224080 (2.9)
GO:0044449	contractile fiber part	4.05e-07	7.54e-05	<0.01	6.39254	4.12263	2.26992	TTN (11.6)	TRDN (11.4)	MYOZ1 (11.0)	LDB3 (10.5)	ENO3 (10.0)	SRL (9.7)	MYH7 (9.7)	SYNPO2L (9.4)	DES (8.9)	CEFIP (8.7)
GO:0030155	regulation of cell adhesion	5.14e-07	0.01	<0.20	6.28904	2	4.28904	GJA5 (3.4)	CRIM1 (3.0)	TMEM204 (3.0)	ENSG00000231437 (3.0)	NAV2 (2.7)	HSPG2 (2.6)	FKBP7 (2.6)	DLC1 (2.4)	KIAA1755 (2.4)	TSC22D2 (2.3)
GO:0005911	cell-cell junction	5.17e-07	0.000866	<0.05	6.28651	3.06248	3.22403	DSP (6.1)	FAT1 (5.2)	COL17A1 (4.0)	PODXL (3.9)	PHLDB2 (3.9)	EFNA1 (3.9)	AIM1L (3.8)	CRYAB (3.7)	DAG1 (3.4)	FREM2 (3.3)
GO:2000145	regulation of cell motility	5.31e-07	0.00974	<0.20	6.27491	2.01144	4.26346	CCBE1 (3.4)	GJA1 (3.2)	DLC1 (3.2)	PHLDB2 (3.2)	ENSG00000224080 (3.1)	CAV1 (3.1)	ITGA9 (3.0)	TMEM204 (3.0)	EPAS1 (3.0)	LAMB2 (2.8)
GO:0000122	negative regulation of transcription from RNA polymerase II promoter	5.31e-07	0.09	<0.20	6.27491	1.04576	5.22915	ZNF358 (4.2)	TOB2 (3.8)	CBX8 (3.4)	ZNF608 (3.3)	MPPED2 (3.1)	IRX3 (3.1)	TEF (3.1)	ZNF503 (3.0)	TFEB (2.9)	ARID2 (2.7)
GO:0004675	transmembrane receptor protein serine/threonine kinase activity	5.52e-07	2.06e-05	<0.01	6.25806	4.68613	1.57193	TCF21 (4.2)	CTDSPL (3.9)	EPAS1 (3.9)	TMEM204 (3.6)	FLRT2 (3.5)	ID2 (3.3)	ITGAV (3.1)	PRKAB2 (3.1)	ACVR2B (3.0)	SKI (3.0)
GO:0051270	regulation of cellular component movement	5.65e-07	0.00741	<0.20	6.24795	2.13018	4.11777	PHLDB2 (3.3)	GJA1 (3.1)	CCBE1 (3.1)	CAV1 (3.1)	DLC1 (3.0)	ITGA9 (3.0)	EPAS1 (3.0)	TMEM204 (3.0)	FERMT2 (2.9)	LAMB2 (2.8)
GO:0043009	chordate embryonic development	5.66e-07	0.00599	<0.20	6.24718	2.22257	4.02461	IRX3 (3.3)	ATXN7L2 (3.2)	WNT11 (3.1)	ACVR2B (3.0)	ZNF358 (2.9)	ZNF503 (2.9)	FGF18 (2.7)	MMP11 (2.7)	MSX2 (2.6)	PDZRN3 (2.5)
GO:0030016	myofibril	5.7e-07	0.000134	<0.01	6.24413	3.8729	2.37123	TTN (11.6)	TRDN (11.3)	MYOZ1 (11.0)	LDB3 (10.2)	SRL (9.8)	ENO3 (9.7)	MYH7 (9.6)	SYNPO2L (9.6)	CEFIP (8.8)	DES (8.5)
GO:0060415	muscle tissue morphogenesis	5.89e-07	0.00342	<0.20	6.22988	2.46597	3.76391	TMEM182 (5.2)	ADPRHL1 (5.1)	TBX20 (4.9)	CEFIP (4.6)	ALPK3 (4.5)	MYH7 (4.5)	SCN5A (4.3)	MYH6 (4.3)	NKX2-5 (4.2)	XIRP1 (4.1)
GO:0007015	actin filament organization	6.39e-07	0.01	<0.20	6.1945	2	4.1945	SH3BGRL3 (3.8)	ENSG00000253932 (3.2)	FHL2 (3.1)	ENSG00000230627 (2.9)	NPM2 (2.8)	ENSG00000176882 (2.8)	ENSG00000237887 (2.8)	C11orf9 (2.8)	C1orf98 (2.7)	PRKCZ (2.7)
GO:0060419	heart growth	6.4e-07	0.00789	<0.20	6.19382	2.10292	4.0909	WT1-AS (4.5)	GJA5 (3.5)	ZFPM2 (3.1)	MYOCD (3.0)	TBX20 (3.0)	NKX2-5 (3.0)	CYP39A1 (2.9)	WNT11 (2.7)	SCN5A (2.7)	PDE3A (2.7)
GO:0044212	transcription regulatory region DNA binding	6.52e-07	0.00249	<0.20	6.18575	2.6038	3.58195	TBX3 (4.7)	TLE3 (4.5)	ZFPM1 (4.1)	ID2 (3.8)	SSBP3 (3.6)	ZMIZ1 (3.4)	IRX3 (3.3)	TBX5 (3.2)	EFNA1 (3.2)	ZNF503 (3.1)
GO:0035265	organ growth	6.79e-07	0.00408	<0.20	6.16813	2.38934	3.77879	WT1-AS (4.0)	GJA5 (3.6)	FIGN (3.4)	MYOCD (3.3)	SLC27A6 (3.0)	ENSG00000237013 (3.0)	NKX2-5 (2.9)	CSH2 (2.9)	ADRB1 (2.9)	PDE3A (2.7)
GO:0005024	transforming growth factor beta-activated receptor activity	6.92e-07	1.45e-05	<0.01	6.15989	4.83863	1.32126	TCF21 (4.1)	EPAS1 (3.9)	CTDSPL (3.8)	TMEM204 (3.6)	SKI (3.6)	ITGAV (3.5)	ACVR2B (3.3)	CALHM2 (3.1)	FLRT2 (3.1)	ZMIZ1 (3.1)
GO:0030017	sarcomere	7.27e-07	0.000175	<0.01	6.13847	3.75696	2.3815	TTN (11.8)	TRDN (11.6)	MYOZ1 (11.0)	LDB3 (10.6)	MYH7 (10.1)	ENO3 (10.0)	SYNPO2L (9.7)	SRL (9.7)	CEFIP (9.1)	XIRP1 (8.7)
GO:0043292	contractile fiber	7.99e-07	9.64e-05	<0.01	6.09745	4.01592	2.08153	TTN (11.5)	TRDN (11.2)	MYOZ1 (11.0)	LDB3 (10.2)	ENO3 (9.8)	SRL (9.6)	MYH7 (9.4)	SYNPO2L (9.4)	DES (9.0)	CEFIP (8.6)
GO:0006936	muscle contraction	8.67e-07	0.000288	<0.05	6.06198	3.54061	2.52137	C20orf166 (6.8)	DES (6.2)	SYPL2 (6.2)	DUSP13 (6.0)	CORO6 (5.7)	SRL (5.7)	OBSCN (5.7)	MYOZ1 (5.5)	PLN (5.5)	CEFIP (5.4)
GO:0004713	protein tyrosine kinase activity	9.76e-07	0.03	<0.20	6.01055	1.52288	4.48767	MAP3K3 (3.8)	TRAK1 (3.5)	LRRFIP2 (3.3)	SSH2 (3.0)	PRKAR2A (2.9)	ZNF609 (2.8)	UBE3B (2.8)	PLCD1 (2.8)	NCK2 (2.6)	ZNF592 (2.6)
GO:0016323	basolateral plasma membrane	1.03e-06	0.00121	<0.20	5.98716	2.91721	3.06995	PODXL (4.6)	PDLIM5 (4.1)	MET (4.1)	CAV2 (3.9)	PLEC (3.8)	DSP (3.6)	PHLDB2 (3.5)	ITGAV (3.4)	SLC8A1 (3.3)	HSPG2 (3.3)
GO:0008285	negative regulation of cell proliferation	1.04e-06	0.00103	<0.20	5.98297	2.98716	2.9958	ST7-AS1 (3.2)	PLCD1 (3.0)	SEMA3A (2.6)	TBX3 (2.4)	KPNA3-IT1 (2.2)	CRAMP1L (2.2)	LRIG1 (2.2)	PDE3A (2.2)	PDZRN3 (2.2)	ZNF358 (2.1)
GO:0030863	cortical cytoskeleton	1.04e-06	0.02	<0.20	5.98297	1.69897	4.284	ENSG00000238018 (4.3)	FHL2 (4.0)	ENSG00000230627 (3.6)	PDLIM5 (3.4)	XPO7 (3.3)	MACF1 (3.2)	SNX22 (3.2)	OSBPL9 (3.2)	SH3BGRL3 (3.1)	GLRX5 (2.9)
GO:0003012	muscle system process	1.05e-06	0.000185	<0.01	5.97881	3.73283	2.24598	C20orf166 (6.8)	DUSP13 (6.2)	SYPL2 (6.2)	DES (6.1)	SRL (5.7)	CORO6 (5.7)	OBSCN (5.6)	TMEM182 (5.5)	CEFIP (5.5)	MYOZ1 (5.5)
GO:0055010	ventricular cardiac muscle tissue morphogenesis	1.08e-06	0.02	<0.20	5.96658	1.69897	4.26761	TBX20 (6.0)	ADPRHL1 (5.9)	TMEM182 (5.5)	NKX2-5 (5.4)	RYR2 (4.8)	SCN5A (4.8)	MYH7 (4.6)	MYH6 (4.6)	CEFIP (4.3)	SLC8A1 (4.3)
GO:0060420	regulation of heart growth	1.09e-06	0.00472	<0.20	5.96257	2.32606	3.63652	WT1-AS (5.0)	ZFPM2 (4.1)	TBX20 (3.8)	GJA5 (3.4)	C11orf9 (3.4)	NKX2-5 (3.1)	RYR2 (3.1)	ENSG00000250062 (3.0)	SCN5A (3.0)	FGF12 (2.9)
GO:0042383	sarcolemma	1.11e-06	0.000137	<0.01	5.95468	3.86328	2.0914	CEFIP (5.6)	LDB3 (5.1)	SSPN (5.1)	AKAP6 (5.0)	OBSCN (4.9)	DES (4.9)	SPEG (4.8)	XIRP1 (4.8)	PPAPDC3 (4.8)	CORO6 (4.8)
GO:0032386	regulation of intracellular transport	1.12e-06	0.000134	<0.01	5.95078	3.8729	2.07789	ENSG00000235257 (3.2)	SSPN (3.0)	C1orf86 (3.0)	MEI1 (2.5)	ZC3H7B (2.5)	DLG1 (2.5)	SESTD1 (2.5)	PDZRN3 (2.4)	GRINA (2.3)	DIXDC1 (2.3)
GO:0009792	embryo development ending in birth or egg hatching	1.13e-06	0.00648	<0.20	5.94692	2.18842	3.7585	ATXN7L2 (3.2)	IRX3 (3.1)	WNT11 (3.1)	ACVR2B (3.0)	ZNF358 (3.0)	FGF18 (2.8)	ZNF503 (2.8)	MMP11 (2.7)	MSX2 (2.6)	PDZRN3 (2.5)
GO:0046332	SMAD binding	1.14e-06	0.0026	<0.20	5.9431	2.58503	3.35807	ID2 (4.9)	SKI (4.1)	PLEKHA3 (4.0)	MAP3K3 (3.4)	ZNF592 (3.3)	GJA1 (3.2)	ZFPM1 (3.1)	ZMIZ1 (3.1)	FERMT2 (2.9)	EP300 (2.8)
GO:0051890	regulation of cardioblast differentiation	1.28e-06	0.00818	<0.20	5.89279	2.08725	3.80554	SLC27A6 (4.6)	TBX20 (4.4)	ZFPM2 (4.4)	SCN5A (4.2)	ADRB1 (3.7)	TTC21A (3.4)	SLC8A1 (3.4)	CDH2 (3.3)	ENSG00000238018 (3.3)	ADPRHL1 (3.2)
GO:0001570	vasculogenesis	1.31e-06	0.00584	<0.20	5.88273	2.23359	3.64914	PODXL (3.9)	ENSG00000244967 (3.8)	ENSG00000229589 (3.4)	EMILIN3 (3.3)	GJA5 (3.2)	COL13A1 (3.2)	CCDC141 (3.1)	WT1-AS (3.1)	CDH13 (3.1)	ZDHHC20 (3.1)
GO:0045785	positive regulation of cell adhesion	1.35e-06	0.001	<0.20	5.86967	3	2.86967	GJA5 (3.3)	FKBP7 (3.2)	GP1BA (3.1)	SEMA3D (3.1)	FGF18 (2.8)	BMP8A (2.8)	CCBE1 (2.7)	CRIM1 (2.7)	ENSG00000226674 (2.6)	NAV2 (2.5)
GO:0000981	sequence-specific DNA binding RNA polymerase II transcription factor activity	1.4e-06	0.02	<0.20	5.85387	1.69897	4.1549	TBX3 (4.9)	ZNF503 (4.5)	ZNF358 (3.8)	ZFPM1 (3.6)	MSX2 (3.5)	CSRNP1 (3.4)	ID2 (3.2)	MPPED2 (3.2)	NFIA (3.0)	IRX3 (3.0)
GO:0007179	transforming growth factor beta receptor signaling pathway	1.41e-06	0.00141	<0.20	5.85078	2.85078	3	GH2 (3.1)	ADAMTSL3 (3.0)	PRKAB2 (2.9)	SKI (2.8)	ZFPM1 (2.8)	KLHDC8B (2.7)	TMEM5 (2.6)	ZMIZ1 (2.6)	ID2 (2.5)	CSH2 (2.5)
GO:0055024	regulation of cardiac muscle tissue development	1.47e-06	0.002	<0.20	5.83268	2.69897	3.13371	TBX20 (4.1)	SCN5A (3.9)	GJA5 (3.7)	WNT11 (3.6)	TBX5 (3.5)	MYOCD (3.2)	NKX2-5 (3.1)	RYR2 (3.1)	HCN4 (3.0)	SLC8A1 (3.0)
GO:0060562	epithelial tube morphogenesis	1.48e-06	0.00394	<0.20	5.82974	2.4045	3.42523	BMPR1A (3.1)	IRX3 (3.1)	FREM2 (3.1)	FGF8 (2.9)	TBX3 (2.9)	MMP11 (2.8)	DFNB59 (2.8)	ZNF503 (2.7)	DCBLD1 (2.7)	PDZRN3 (2.7)
GO:0010717	regulation of epithelial to mesenchymal transition	1.49e-06	0.00924	<0.20	5.82681	2.03433	3.79249	IRX3 (3.2)	TBX20 (2.9)	CCBE1 (2.9)	ZNF683 (2.8)	TBX3 (2.8)	ITGA9 (2.7)	LINC00477 (2.7)	NKD2 (2.7)	TSC22D2 (2.7)	SKI (2.6)
GO:0030323	respiratory tube development	1.66e-06	5.07e-05	<0.01	5.77989	4.29499	1.4849	TCF21 (4.5)	C11orf9 (4.4)	MUC1 (3.6)	TBX5 (3.4)	FGF18 (3.2)	DCBLD1 (3.1)	GJA5 (3.0)	ADAMTSL3 (2.7)	RTKN2 (2.7)	TBX3 (2.7)
GO:0032956	regulation of actin cytoskeleton organization	1.76e-06	0.04	<0.20	5.75449	1.39794	4.35655	ENSG00000253932 (3.6)	SH3BGRL3 (3.4)	ENSG00000249816 (3.1)	ENSG00000253447 (2.7)	ENSG00000237887 (2.6)	PRKCZ (2.6)	STRN (2.6)	ENSG00000217075 (2.6)	RHOA (2.6)	NPM2 (2.5)
GO:0000975	regulatory region DNA binding	2.07e-06	0.00375	<0.20	5.68403	2.42597	3.25806	TBX3 (4.7)	TLE3 (4.5)	ZFPM1 (4.1)	ID2 (3.8)	SSBP3 (3.5)	ZMIZ1 (3.4)	EFNA1 (3.4)	TBX5 (3.2)	IRX3 (3.2)	CCNL1 (3.0)
GO:0001067	regulatory region nucleic acid binding	2.07e-06	0.00375	<0.20	5.68403	2.42597	3.25806	TBX3 (4.7)	TLE3 (4.5)	ZFPM1 (4.1)	ID2 (3.8)	SSBP3 (3.5)	ZMIZ1 (3.4)	EFNA1 (3.4)	TBX5 (3.2)	IRX3 (3.2)	CCNL1 (3.0)
GO:0048644	muscle organ morphogenesis	2.14e-06	0.00788	<0.20	5.66959	2.10347	3.56611	ADPRHL1 (5.1)	TMEM182 (5.0)	TBX20 (4.8)	CEFIP (4.7)	MYH7 (4.6)	ALPK3 (4.5)	C20orf166 (4.4)	XIRP1 (4.3)	MYH6 (4.0)	NKX2-5 (4.0)
GO:0051271	negative regulation of cellular component movement	2.15e-06	0.02	<0.20	5.66756	1.69897	3.96859	GJA5 (3.2)	ENSG00000243629 (3.0)	RAB3B (2.8)	FGF5 (2.8)	FUT11 (2.7)	RBPMS (2.7)	PODXL (2.5)	EPAS1 (2.5)	TMEM204 (2.5)	ZSCAN2 (2.4)
GO:0017015	regulation of transforming growth factor beta receptor signaling pathway	2.17e-06	0.05	<0.20	5.66354	1.30103	4.36251	KLHDC8B (3.1)	ZFPM1 (3.0)	CCBE1 (2.8)	FUT11 (2.6)	DCBLD1 (2.5)	SKI (2.5)	CRAMP1L (2.4)	TCF21 (2.4)	KCTD10 (2.4)	ARID2 (2.3)
GO:0030324	lung development	2.31e-06	2.74e-05	<0.01	5.63639	4.56225	1.07414	TCF21 (4.6)	C11orf9 (4.4)	MUC1 (3.7)	TBX5 (3.5)	FGF18 (3.1)	DCBLD1 (3.1)	GJA5 (2.9)	ADAMTSL3 (2.8)	SEMA3A (2.7)	COL13A1 (2.7)
GO:0031672	A band	2.34e-06	0.0032	<0.20	5.63078	2.49485	3.13593	MYH6 (10.5)	TRDN (10.3)	TTN (10.0)	MYH7 (9.9)	LDB3 (9.6)	CEFIP (9.3)	SRL (9.0)	ENO3 (8.8)	MYOZ1 (8.8)	SYNPO2L (8.7)
GO:0016055	Wnt receptor signaling pathway	2.34e-06	0.01	<0.20	5.63078	2	3.63078	NKD2 (3.6)	FREM2 (3.3)	ENSG00000250107 (3.2)	ZNF358 (3.2)	MSX2 (3.2)	FGFR2 (3.1)	LDB1 (3.0)	FGF8 (3.0)	FGFR1 (2.9)	PDZRN3 (2.9)
GO:0030864	cortical actin cytoskeleton	2.42e-06	0.03	<0.20	5.61618	1.52288	4.09331	ENSG00000238018 (4.0)	ENSG00000237887 (3.7)	KIAA0754 (3.5)	ENSG00000230627 (3.2)	VEPH1 (3.2)	SNX22 (3.1)	FHL2 (3.0)	MACF1 (3.0)	SIPA1L1 (3.0)	ADCY5 (2.9)
GO:0043236	laminin binding	2.51e-06	0.03	<0.20	5.60033	1.52288	4.07745	HSPG2 (5.8)	DAG1 (4.4)	SORBS1 (4.0)	CAV1 (3.9)	ENSG00000235257 (3.8)	LAMB2 (3.8)	PODXL (3.6)	SPTBN1 (3.6)	ITGAV (3.4)	ITGB1 (3.3)
GO:0060541	respiratory system development	2.97e-06	0.000107	<0.01	5.52724	3.97062	1.55663	C11orf9 (4.5)	TCF21 (4.3)	MUC1 (3.6)	FGF18 (3.3)	NKD2 (3.2)	SH3PXD2A (3.2)	DCBLD1 (3.2)	TBX5 (3.1)	GJA5 (3.0)	WNT11 (2.9)
GO:0046982	protein heterodimerization activity	3.01e-06	3.39e-05	<0.01	5.52143	4.4698	1.05163	BEND7 (3.3)	BMPR1A (3.2)	NR3C1 (3.1)	TMEM26 (2.9)	PITX3 (2.9)	ACCN4 (2.7)	FOXP1 (2.6)	NMB (2.6)	ZNF592 (2.5)	SLC6A15 (2.5)
GO:0055017	cardiac muscle tissue growth	3.03e-06	0.02	<0.20	5.51856	1.69897	3.81959	GJA5 (3.9)	MYOCD (3.8)	NKX2-5 (3.7)	TBX20 (3.7)	SLC8A1 (3.1)	ENSG00000227839 (3.0)	SCN5A (2.9)	WNT11 (2.8)	TBX5 (2.7)	RYR2 (2.7)
GO:0051147	regulation of muscle cell differentiation	3.07e-06	9.4e-05	<0.01	5.51286	4.02687	1.48599	PITX3 (6.1)	CCDC141 (3.2)	CBX8 (3.1)	PPAPDC3 (3.1)	NFIA (3.0)	DUSP13 (3.0)	C20orf166 (2.8)	C6orf195 (2.8)	TMTC2 (2.7)	SCN5A (2.6)
GO:2000146	negative regulation of cell motility	3.24e-06	0.04	<0.20	5.48945	1.39794	4.09151	GJA5 (3.2)	ENSG00000243629 (3.2)	FGF5 (3.0)	RAB3B (2.9)	FUT11 (2.7)	ZSCAN2 (2.6)	PODXL (2.6)	RBPMS (2.6)	EPAS1 (2.6)	TBX5 (2.4)
GO:0040012	regulation of locomotion	3.39e-06	0.02	<0.20	5.4698	1.69897	3.77083	GJA1 (3.3)	CCBE1 (3.3)	CAV1 (3.3)	ENSG00000224080 (3.2)	DLC1 (3.1)	ITGA9 (3.0)	PHLDB2 (3.0)	LAMB2 (3.0)	FLRT2 (3.0)	TMEM204 (2.9)
GO:0003230	cardiac atrium development	3.43e-06	0.00291	<0.20	5.46471	2.53611	2.9286	TBX20 (6.6)	TBX5 (5.4)	CCDC141 (5.2)	SCN5A (5.0)	EFCAB5 (4.7)	ENSG00000253932 (4.5)	SLC8A1 (4.1)	HCN4 (4.1)	FGF12 (4.0)	ADPRHL1 (3.9)
GO:0055117	regulation of cardiac muscle contraction	3.79e-06	7.36e-05	<0.01	5.42136	4.13312	1.28824	CHRM2 (4.3)	ENSG00000250107 (4.1)	SCN5A (4.1)	SLC8A1 (3.7)	HCN4 (3.7)	ENSG00000257711 (3.6)	ADPRHL1 (3.4)	TBX5 (3.1)	FGF12 (3.0)	CSDC2 (3.0)
GO:0060485	mesenchyme development	3.79e-06	0.01	<0.20	5.42136	2	3.42136	NKD2 (4.2)	ENSG00000250107 (3.5)	TBX3 (3.5)	SEMA3A (3.5)	ENSG00000248463 (3.4)	MSX2 (3.3)	WNT11 (3.1)	VILL (3.0)	FGF18 (3.0)	PDZRN3 (2.9)
GO:0002009	morphogenesis of an epithelium	4.05e-06	0.00516	<0.20	5.39254	2.28735	3.10519	FREM2 (3.4)	FGF8 (3.3)	SRGAP1 (3.2)	IRX3 (3.2)	NKD2 (3.2)	COL13A1 (3.0)	TBX3 (2.9)	SLC12A7 (2.9)	ZNF503 (2.9)	DCBLD1 (2.8)
GO:0001701	in utero embryonic development	4.08e-06	0.00429	<0.20	5.38934	2.36754	3.0218	DCBLD1 (3.0)	EFNA1 (2.8)	ZFPM1 (2.8)	PODXL (2.6)	FBXW8 (2.6)	ACVR2B (2.6)	ZNF592 (2.5)	ARID2 (2.4)	ZNF358 (2.4)	PCNXL3 (2.4)
GO:0046620	regulation of organ growth	4.32e-06	0.01	<0.20	5.36452	2	3.36452	WT1-AS (4.6)	ENSG00000237013 (3.6)	NKX2-5 (3.5)	CSH2 (3.4)	C22orf15 (3.4)	GJA5 (3.3)	SLC27A6 (2.9)	SCN5A (2.8)	RYR2 (2.8)	PDE3A (2.8)
GO:0005160	transforming growth factor beta receptor binding	4.74e-06	0.00221	<0.20	5.32422	2.65561	2.66861	ID2 (5.4)	SKI (4.2)	EPAS1 (4.2)	NPR3 (3.7)	ZMIZ1 (3.6)	WNT11 (3.3)	MSX2 (3.2)	TCF21 (3.1)	PODXL (3.1)	CALHM2 (3.1)
GO:0001525	angiogenesis	4.88e-06	0.04	<0.20	5.31158	1.39794	3.91364	TMEM204 (4.5)	HSPG2 (4.4)	PODXL (3.7)	CDH13 (3.5)	EPAS1 (3.2)	COL13A1 (3.2)	CAV1 (3.1)	HLX (3.1)	ITGA9 (3.1)	DLC1 (2.9)
GO:0005667	transcription factor complex	5.45e-06	0.00736	<0.20	5.2636	2.13312	3.13048	MSX2 (3.6)	FOXP1 (3.5)	TBX3 (3.4)	TFAP4 (3.2)	NR2F1 (3.0)	PRRX1 (3.0)	PITX3 (2.9)	MARK3 (2.8)	SSBP3 (2.8)	ID2 (2.8)
GO:0050678	regulation of epithelial cell proliferation	5.62e-06	0.01	<0.20	5.25026	2	3.25026	FLRT2 (3.8)	SH3PXD2A (3.2)	PDZRN3 (3.0)	FUT11 (2.9)	NR2F1 (2.8)	GJA1 (2.7)	SEMA3A (2.7)	NFIA (2.7)	ADAMTSL3 (2.6)	FGFR2 (2.6)
GO:0042805	actinin binding	5.77e-06	9.54e-06	<0.01	5.23882	5.02045	0.218373	MYOZ1 (5.6)	CEFIP (5.3)	TRDN (5.2)	DES (5.1)	TTN (4.8)	DUSP13 (4.7)	GJA5 (4.6)	XIRP1 (4.6)	OBSCN (4.6)	TMEM182 (4.5)
GO:0031589	cell-substrate adhesion	5.79e-06	0.00226	<0.20	5.23732	2.64589	2.59143	ENSG00000237887 (3.9)	HSPG2 (3.7)	FKBP7 (3.5)	SH3PXD2A (3.5)	TMEM204 (3.3)	LAMB2 (3.1)	GJA5 (3.1)	SDPR (2.9)	ENSG00000235257 (2.8)	PDGFRL (2.7)
GO:0060412	ventricular septum morphogenesis	5.81e-06	0.03	<0.20	5.23582	1.52288	3.71295	ENSG00000226688 (3.3)	ENSG00000250107 (3.0)	ZNF358 (3.0)	ST7-AS1 (2.8)	ZSCAN2 (2.8)	ARHGEF40 (2.6)	BMPR1A (2.5)	HCN4 (2.5)	ID2 (2.5)	SCN5A (2.5)
GO:0003785	actin monomer binding	7.27e-06	0.007	<0.20	5.13847	2.1549	2.98356	MYH7 (8.2)	MYH6 (6.3)	TTN (5.6)	SYNPO2L (5.3)	CEFIP (4.9)	LDB3 (4.8)	SRL (4.8)	XIRP1 (4.5)	ENO3 (4.4)	ADPRHL1 (4.3)
GO:0060828	regulation of canonical Wnt receptor signaling pathway	7.36e-06	0.03	<0.20	5.13312	1.52288	3.61024	ENSG00000235257 (3.4)	SH3PXD2A (3.4)	DCBLD1 (3.3)	SEMA3D (3.2)	NKD2 (2.9)	ZNF358 (2.8)	PDGFRL (2.7)	CACNA1G (2.7)	FKBP7 (2.6)	FREM2 (2.5)
GO:0006942	regulation of striated muscle contraction	7.41e-06	0.000135	<0.01	5.13018	3.86967	1.26052	TMEM182 (5.7)	C20orf166 (5.4)	CORO6 (5.4)	SRL (5.1)	OBSCN (5.0)	ADPRHL1 (4.9)	CEFIP (4.9)	DUSP13 (4.8)	PPAPDC3 (4.6)	XIRP1 (4.6)
GO:0048747	muscle fiber development	8.23e-06	0.000577	<0.05	5.0846	3.23882	1.84578	PITX3 (5.2)	C20orf166 (4.1)	DUSP13 (4.0)	CORO6 (4.0)	SCN5A (4.0)	DES (3.9)	SYPL2 (3.9)	CHRNE (3.8)	CCDC141 (3.8)	SPEG (3.6)
GO:0000976	transcription regulatory region sequence-specific DNA binding	8.65e-06	0.02	<0.20	5.06298	1.69897	3.36401	TBX20 (4.8)	ELAVL4 (4.4)	IRX3 (4.1)	TBX3 (4.1)	ENSG00000237125 (3.9)	MPPED2 (3.9)	TLE3 (3.7)	ZFPM1 (3.4)	ID2 (2.9)	SLC6A4 (2.7)
GO:0003215	cardiac right ventricle morphogenesis	9.25e-06	0.0056	<0.20	5.03386	2.25181	2.78205	ENSG00000237125 (5.9)	TBX20 (5.6)	SLC27A6 (4.2)	ZFPM1 (3.9)	NKX2-5 (3.7)	RYR2 (3.6)	SCN5A (3.6)	CSDC2 (3.5)	MYOCD (3.4)	SIPA1L2 (3.2)
GO:0005178	integrin binding	9.41e-06	0.01	<0.20	5.02641	2	3.02641	HSPG2 (5.3)	CAV1 (4.5)	SDPR (4.3)	ITGAV (4.2)	GP1BA (3.9)	TMEM204 (3.8)	ITGB1 (3.6)	LAMB2 (3.6)	DPT (3.5)	GJA1 (3.3)
GO:0045926	negative regulation of growth	9.61e-06	0.00207	<0.20	5.01728	2.68403	2.33325	BPI (4.0)	SEMA3D (3.0)	FSIP2 (2.9)	C3orf71 (2.7)	EID3 (2.6)	CRIM1 (2.6)	P4HTM (2.5)	TSC22D2 (2.4)	C5orf41 (2.3)	FGF18 (2.3)
GO:0014855	striated muscle cell proliferation	9.86e-06	0.02	<0.20	5.00612	1.69897	3.30715	MYOCD (4.0)	GJA5 (3.9)	TBX20 (3.8)	NKX2-5 (3.4)	HCN4 (3.0)	WNT11 (2.9)	ENSG00000227839 (2.9)	ENSG00000237013 (2.7)	ENSG00000244967 (2.6)	SLC8A1 (2.6)
GO:0017124	SH3 domain binding	9.89e-06	0.00148	<0.20	5.0048	2.82974	2.17507	RASEF (3.4)	LIMD2 (3.4)	SIPA1 (3.2)	ENSG00000222872 (3.1)	MAP3K11 (2.9)	CTTNBP2NL (2.8)	SESTD1 (2.8)	TFEB (2.7)	TRAK1 (2.6)	PTK2 (2.6)
GO:0003209	cardiac atrium morphogenesis	1.09e-05	0.0039	<0.20	4.96257	2.40894	2.55364	TBX20 (6.1)	TBX5 (5.4)	CCDC141 (5.1)	SCN5A (4.8)	EFCAB5 (4.6)	ENSG00000253932 (4.4)	ADPRHL1 (3.8)	HCN4 (3.8)	SLC8A1 (3.7)	FGF12 (3.7)
GO:0048041	focal adhesion assembly	1.19e-05	0.00217	<0.20	4.92445	2.66354	2.26091	KIAA0754 (4.1)	ENSG00000249816 (3.8)	C1orf98 (3.5)	RBPMS (3.1)	ENSG00000226674 (2.9)	CSNK1G1 (2.9)	ENSG00000226688 (2.8)	MTUS1 (2.6)	SLC12A7 (2.5)	CRIM1 (2.4)
GO:0040013	negative regulation of locomotion	1.22e-05	0.06	<0.20	4.91364	1.22185	3.69179	GJA5 (3.4)	ENSG00000243629 (3.2)	RAB3B (3.2)	FGF5 (3.0)	FUT11 (2.8)	ZSCAN2 (2.6)	CCBE1 (2.6)	PRKAR2A (2.6)	TBX5 (2.5)	LAMB2 (2.4)
GO:0090101	negative regulation of transmembrane receptor protein serine/threonine kinase signaling pathway	1.27e-05	0.00271	<0.20	4.8962	2.56703	2.32917	FOXP1-AS1 (3.8)	EMB (3.3)	C3orf71 (3.2)	FUT11 (3.0)	NPR3 (2.9)	TBX5 (2.9)	CRLF1 (2.8)	ENSG00000257726 (2.8)	GJA5 (2.8)	MMP11 (2.8)
GO:0030336	negative regulation of cell migration	1.28e-05	0.05	<0.20	4.89279	1.30103	3.59176	FGF5 (3.3)	ENSG00000243629 (3.2)	GJA5 (3.1)	RAB3B (2.9)	FUT11 (2.7)	ADAMTSL3 (2.7)	ZSCAN2 (2.6)	PODXL (2.6)	EPAS1 (2.5)	RBPMS (2.5)
GO:0014031	mesenchymal cell development	1.31e-05	0.01	<0.20	4.88273	2	2.88273	NKD2 (3.9)	TBX3 (3.2)	ENSG00000250107 (3.0)	MSX2 (3.0)	ENSG00000248463 (2.9)	FGF5 (2.9)	SEMA3A (2.9)	FREM2 (2.8)	CRLF1 (2.8)	IRX3 (2.8)
GO:0008307	structural constituent of muscle	1.39e-05	0.00135	<0.20	4.85699	2.86967	1.98732	MYOZ1 (11.8)	TTN (11.7)	TRDN (11.4)	LDB3 (10.0)	ENO3 (9.7)	SRL (9.7)	SYNPO2L (9.1)	DES (8.8)	MYH7 (8.7)	CEFIP (8.1)
GO:0003151	outflow tract morphogenesis	1.57e-05	0.02	<0.20	4.8041	1.69897	3.10513	FGF18 (2.8)	SEMA3D (2.7)	FIGN (2.7)	FGF5 (2.5)	ZFPM2 (2.4)	ENSG00000253447 (2.4)	ENSG00000227375 (2.4)	PDZRN3 (2.4)	PODXL (2.4)	MPPED2 (2.4)
GO:0070848	response to growth factor stimulus	1.64e-05	0.05	<0.20	4.78516	1.30103	3.48413	ZNF608 (3.8)	DLC1 (3.3)	CCBE1 (3.0)	ENSG00000227839 (2.8)	GJA1 (2.7)	ENSG00000227375 (2.6)	ENSG00000230525 (2.6)	COL13A1 (2.6)	ARHGEF40 (2.5)	HSPG2 (2.5)
GO:0060038	cardiac muscle cell proliferation	1.79e-05	0.03	<0.20	4.74715	1.52288	3.22427	MYOCD (4.0)	TBX20 (4.0)	GJA5 (3.8)	NKX2-5 (3.5)	ENSG00000227839 (3.0)	WNT11 (2.9)	ENSG00000244967 (2.9)	SLC8A1 (2.8)	HCN4 (2.7)	ENSG00000237013 (2.7)
GO:0060284	regulation of cell development	2.05e-05	0.02	<0.20	4.68825	1.69897	2.98928	RFX4 (3.8)	DMRTA2 (3.2)	ANKRD13B (3.1)	ARHGEF40 (3.0)	SLC35F1 (3.0)	LPHN3 (3.0)	NR2F1 (2.9)	LINC00477 (2.8)	ENSG00000238018 (2.8)	ENSG00000240973 (2.7)
GO:0050673	epithelial cell proliferation	2.26e-05	0.04	<0.20	4.64589	1.39794	3.24795	FLRT2 (4.1)	FUT11 (3.2)	SH3PXD2A (3.0)	PDZRN3 (2.9)	GJA1 (2.9)	FGF18 (2.9)	FGFR2 (2.9)	SEMA3A (2.7)	ADAMTSL3 (2.7)	TMEM26 (2.7)
GO:0030111	regulation of Wnt receptor signaling pathway	2.31e-05	0.07	<0.20	4.63639	1.1549	3.48149	TMEM26 (3.2)	FGFR1 (3.0)	MSX2 (3.0)	NKD2 (2.9)	ZNF358 (2.9)	SH3PXD2A (2.8)	FREM2 (2.8)	DCBLD1 (2.8)	CACNA1G (2.7)	ENSG00000250107 (2.6)
GO:0008201	heparin binding	2.45e-05	0.00336	<0.20	4.61083	2.47366	2.13717	DPT (6.1)	BPI (5.7)	ADAMTSL3 (4.3)	PDGFRL (3.9)	FGF18 (3.5)	THBS3 (3.5)	DLC1 (3.4)	FGFR1 (3.3)	CRLF1 (3.2)	FLRT2 (3.2)
GO:0009968	negative regulation of signal transduction	2.45e-05	0.24	<0.20	4.61083	0.619789	3.99105	SH3PXD2A (3.3)	SKI (2.9)	TMEM26 (2.9)	ZNF683 (2.9)	DLC1 (2.7)	MAP3K3 (2.7)	TMTC2 (2.6)	NKD2 (2.6)	FGFR1 (2.5)	ENSG00000245768 (2.5)
GO:0048598	embryonic morphogenesis	2.48e-05	0.000863	<0.05	4.60555	3.06399	1.54156	IRX3 (4.0)	FGF8 (3.9)	ZNF503 (3.2)	MEIS1 (2.8)	MMP11 (2.7)	MSX2 (2.7)	DMRTA2 (2.6)	ACVR2B (2.6)	SEMA3A (2.6)	NKD2 (2.6)
GO:0000146	microfilament motor activity	2.7e-05	0.00929	<0.20	4.56864	2.03198	2.53665	TTN (8.6)	SRL (7.5)	SYNPO2L (7.5)	TRDN (7.2)	MYOZ1 (7.1)	LDB3 (7.1)	ENO3 (6.2)	MYH6 (6.1)	XIRP1 (6.1)	MYH7 (6.0)
GO:0001726	ruffle	2.76e-05	0.00961	<0.20	4.55909	2.01728	2.54181	C11orf9 (4.2)	PLEC (3.8)	RBPMS2 (3.4)	CTTNBP2NL (3.2)	CAV2 (3.0)	PODXL (3.0)	MACF1 (2.9)	FREM2 (2.9)	PTK2 (2.9)	KIAA0754 (2.8)
GO:0031252	cell leading edge	2.86e-05	0.01	<0.20	4.54363	2	2.54363	CTTNBP2NL (4.9)	PLEC (3.7)	MACF1 (3.7)	FAT1 (3.5)	SRGAP1 (3.4)	ITGAV (3.4)	FGFR1 (3.3)	SPTBN1 (3.3)	FERMT2 (3.2)	FHL2 (3.1)
GO:0005884	actin filament	2.96e-05	0.04	<0.20	4.52871	1.39794	3.13077	DES (5.2)	PDLIM5 (4.4)	TTN (4.2)	LDB3 (4.2)	FHL2 (4.1)	SYNPO2L (3.9)	MYH7 (3.9)	TRDN (3.9)	CRYAB (3.9)	MYOZ1 (3.9)
GO:0001077	RNA polymerase II core promoter proximal region sequence-specific DNA binding transcription factor activity involved in positive regulation of transcription	3.09e-05	0.00737	<0.20	4.51004	2.13253	2.37751	CSRNP1 (4.9)	WT1-AS (3.8)	CCNL1 (3.4)	ZFPM1 (3.4)	TBX3 (3.3)	NR2F1 (3.2)	MEIS1 (3.1)	EDN2 (3.1)	GNAT2 (2.9)	ZFPM2 (2.9)
GO:0016459	myosin complex	3.11e-05	0.0025	<0.20	4.50724	2.60206	1.90518	TTN (10.6)	MYOZ1 (9.9)	TRDN (9.4)	SRL (9.0)	ENO3 (8.6)	LDB3 (8.4)	SYNPO2L (8.1)	MYH7 (7.9)	CEFIP (6.8)	XIRP1 (6.7)
GO:0030510	regulation of BMP signaling pathway	3.16e-05	0.0077	<0.20	4.50031	2.11351	2.3868	FGF18 (3.4)	FLRT2 (2.9)	BMPR1A (2.7)	WNT11 (2.7)	IRX3 (2.6)	FSIP2 (2.6)	PHLDB2 (2.6)	ENSG00000231064 (2.6)	ID2 (2.6)	TBX5 (2.5)
GO:0006937	regulation of muscle contraction	3.19e-05	0.000557	<0.05	4.49621	3.25414	1.24206	C20orf166 (4.9)	ENSG00000230525 (4.8)	DES (4.7)	ADPRHL1 (4.4)	SYPL2 (4.4)	TMEM182 (4.3)	PLN (4.3)	OBSCN (4.2)	CORO6 (4.2)	CEFIP (4.1)
GO:0019902	phosphatase binding	3.37e-05	0.05	<0.20	4.47237	1.30103	3.17134	SCN5A (3.1)	SYNE2 (2.8)	C10orf76 (2.7)	SLC27A6 (2.6)	ASH1L (2.6)	C11orf9 (2.6)	ZNF592 (2.6)	RIC8B (2.6)	MYH7 (2.5)	ADCY5 (2.4)
GO:0001837	epithelial to mesenchymal transition	3.4e-05	0.04	<0.20	4.46852	1.39794	3.07058	ZNF683 (3.9)	TBX3 (3.5)	MSX2 (3.5)	COL13A1 (3.2)	PRRX1 (3.1)	IRX3 (3.1)	NKD2 (2.9)	FGF5 (2.9)	ENSG00000248463 (2.8)	KIAA1755 (2.8)
GO:0016460	myosin II complex	3.43e-05	0.00114	<0.20	4.46471	2.9431	1.52161	TTN (10.9)	MYOZ1 (10.6)	TRDN (10.0)	SRL (9.5)	LDB3 (9.1)	ENO3 (9.0)	SYNPO2L (8.5)	MYH7 (7.7)	DES (7.4)	CEFIP (7.1)
GO:0009894	regulation of catabolic process	3.57e-05	0.14	<0.20	4.44733	0.853872	3.59346	STRN (3.2)	PTK2 (3.2)	BTRC (3.2)	LRCH1 (3.0)	SSH2 (3.0)	EPS15 (2.9)	DLG1 (2.9)	C5orf41 (2.7)	MTA3 (2.7)	SHARPIN (2.6)
GO:0003143	embryonic heart tube morphogenesis	3.7e-05	0.00282	<0.20	4.4318	2.54975	1.88205	HCN4 (4.1)	ENSG00000244967 (3.3)	ENSG00000230627 (3.2)	TTC21A (2.9)	ESR2 (2.8)	PODXL (2.8)	PIH1D2 (2.8)	ENSG00000237125 (2.6)	ENSG00000250062 (2.5)	MYOCD (2.4)
GO:0005859	muscle myosin complex	3.75e-05	0.001	<0.20	4.42597	3	1.42597	TTN (11.2)	MYOZ1 (10.8)	TRDN (10.4)	SRL (9.6)	LDB3 (9.6)	ENO3 (9.4)	SYNPO2L (8.7)	DES (8.3)	MYH7 (8.1)	CEFIP (7.2)
GO:0048742	regulation of skeletal muscle fiber development	4.17e-05	0.00796	<0.20	4.37986	2.09909	2.28078	SCN5A (3.3)	KIAA1755 (3.1)	PITX3 (3.0)	NFIA (2.8)	PAM (2.8)	TESC (2.7)	CCDC141 (2.7)	BEND5 (2.7)	SPEG (2.7)	OBSL1 (2.5)
GO:0030315	T-tubule	4.44e-05	0.00872	<0.20	4.35262	2.05948	2.29313	CEFIP (6.4)	MYOZ1 (5.5)	OBSCN (5.4)	TRDN (5.3)	LDB3 (5.3)	XIRP1 (5.2)	SYPL2 (5.1)	SLC8A1 (5.0)	CORO6 (4.9)	ADPRHL1 (4.9)
GO:0090100	positive regulation of transmembrane receptor protein serine/threonine kinase signaling pathway	4.53e-05	0.00731	<0.20	4.3439	2.13608	2.20782	KLHDC8B (3.5)	TBX20 (3.4)	PDE3A (3.1)	ST7-OT4 (3.1)	TCF21 (2.9)	PHLDB2 (2.9)	ZFPM1 (2.7)	ACVR2B (2.7)	GJA5 (2.5)	ZNF358 (2.5)
GO:0048545	response to steroid hormone stimulus	4.55e-05	0.00225	<0.20	4.34199	2.64782	1.69417	CSH2 (2.8)	GH2 (2.7)	CACNA1D (2.7)	EDN2 (2.6)	C1orf148 (2.6)	IGFALS (2.4)	MUC1 (2.4)	PDE3A (2.3)	ACAA1 (2.2)	CCK (2.2)
GO:0005938	cell cortex	4.56e-05	0.07	<0.20	4.34104	1.1549	3.18613	PDLIM5 (4.3)	FERMT2 (4.3)	FHL2 (3.9)	OSBPL9 (3.2)	MACF1 (3.1)	SPTBN1 (3.1)	TES (3.0)	KCTD10 (3.0)	PHLDB2 (2.9)	GNAI3 (2.9)
GO:0051015	actin filament binding	5.24e-05	0.000629	<0.05	4.28067	3.20135	1.07932	PKLR (3.5)	SPTBN1 (3.1)	KIAA0754 (3.0)	KCTD10 (2.9)	RBPMS2 (2.8)	FHL2 (2.7)	PDLIM5 (2.7)	VEPH1 (2.6)	CTTNBP2NL (2.6)	PLEC (2.5)
GO:0010927	cellular component assembly involved in morphogenesis	5.25e-05	0.02	<0.20	4.27984	1.69897	2.58087	PIH1D2 (6.8)	IFT88 (5.6)	TTC21A (4.6)	UBXN11 (4.2)	DPCD (3.8)	ADPRHL1 (3.7)	ENSG00000226688 (3.5)	CEFIP (3.4)	IFT140 (3.3)	NKX2-5 (3.2)
GO:0035050	embryonic heart tube development	5.3e-05	0.00493	<0.20	4.27572	2.30715	1.96857	LPIN3 (3.4)	ENSG00000244967 (3.4)	HCN4 (3.4)	TTC21A (3.3)	ENSG00000248463 (3.0)	ESR2 (3.0)	PODXL (2.9)	PIH1D2 (2.8)	MYOCD (2.7)	DCBLD1 (2.7)
GO:0022604	regulation of cell morphogenesis	5.31e-05	0.08	<0.20	4.27491	1.09691	3.178	NAV2 (3.1)	ENSG00000240973 (2.8)	ENSG00000231437 (2.8)	C11orf9 (2.6)	CORO2B (2.6)	SIPA1L2 (2.5)	CDH2 (2.4)	WNT9A (2.4)	SKI (2.3)	ZMIZ1 (2.3)
GO:0050679	positive regulation of epithelial cell proliferation	5.6e-05	0.03	<0.20	4.25181	1.52288	2.72893	FOXP1-AS1 (3.9)	SH3PXD2A (3.2)	FLRT2 (3.1)	FGF18 (2.9)	ADAMTSL3 (2.7)	DCBLD1 (2.7)	ENSG00000259359 (2.7)	CRLF1 (2.6)	FUT11 (2.5)	PDZRN3 (2.5)
GO:0048762	mesenchymal cell differentiation	5.63e-05	0.02	<0.20	4.24949	1.69897	2.55052	NKD2 (4.1)	SEMA3A (3.3)	ENSG00000250107 (3.3)	MSX2 (3.2)	TBX3 (3.2)	COL13A1 (3.1)	FREM2 (3.0)	FGF8 (3.0)	ENSG00000248463 (2.9)	PDZRN3 (2.8)
GO:0090257	regulation of muscle system process	5.68e-05	0.000347	<0.05	4.24565	3.45967	0.785981	C20orf166 (4.9)	DES (4.6)	ADPRHL1 (4.6)	TMEM182 (4.5)	SYPL2 (4.4)	PLN (4.3)	CORO6 (4.3)	CEFIP (4.2)	OBSCN (4.1)	ENSG00000230525 (4.1)
GO:0032587	ruffle membrane	5.98e-05	0.00676	<0.20	4.2233	2.17005	2.05325	RBPMS2 (4.0)	KIAA0754 (3.8)	DTNA (3.3)	CX3CR1 (3.3)	FGF18 (3.2)	C11orf9 (3.2)	PODXL (2.9)	RAB3B (2.8)	CTTNBP2NL (2.8)	FREM2 (2.8)
GO:0006941	striated muscle contraction	6.03e-05	0.000768	<0.05	4.21968	3.11464	1.10504	TMEM182 (6.7)	SRL (6.6)	TRDN (6.3)	CORO6 (6.2)	DUSP13 (6.1)	ENO3 (6.1)	C20orf166 (6.1)	OBSCN (6.0)	CEFIP (5.9)	MYOZ1 (5.9)
GO:0007160	cell-matrix adhesion	6.07e-05	0.02	<0.20	4.21681	1.69897	2.51784	ENSG00000237887 (3.6)	SH3PXD2A (3.6)	MET (3.3)	SUN1 (3.2)	HSPG2 (3.1)	CTDSPL (3.0)	KIAA0754 (3.0)	SDPR (2.9)	LAMB2 (2.9)	ENSG00000235257 (2.9)
GO:0005100	Rho GTPase activator activity	6.88e-05	0.03	<0.20	4.16241	1.52288	2.63953	SIPA1 (4.4)	CTTNBP2NL (3.5)	ZNF592 (3.4)	CSRNP1 (3.3)	MAP3K11 (3.1)	SPATC1 (3.1)	PODXL (3.0)	RCAN2 (2.9)	SESTD1 (2.8)	TRAK1 (2.7)
GO:0030027	lamellipodium	6.93e-05	0.01	<0.20	4.15927	2	2.15927	CTTNBP2NL (5.7)	FERMT2 (4.3)	SESTD1 (3.9)	PHLDB2 (3.8)	FAT1 (3.6)	ITGAV (3.5)	MACF1 (3.2)	PTK2 (3.1)	DSP (3.0)	SPTBN1 (3.0)
GO:0031432	titin binding	7.26e-05	0.00685	<0.20	4.13906	2.16431	1.97475	TRDN (10.1)	TTN (9.5)	CEFIP (9.2)	OBSCN (9.1)	LDB3 (9.1)	SRL (8.7)	XIRP1 (8.6)	MYOZ1 (8.6)	MYH7 (8.5)	ENO3 (8.4)
GO:0000982	RNA polymerase II core promoter proximal region sequence-specific DNA binding transcription factor activity	7.41e-05	0.00924	<0.20	4.13018	2.03433	2.09585	CSRNP1 (5.7)	CCNL1 (4.6)	TBX3 (3.8)	ID2 (3.5)	ZFPM1 (3.0)	MSX2 (2.9)	IRX3 (2.8)	WT1-AS (2.7)	ACCN4 (2.7)	TLE3 (2.5)
GO:0006606	protein import into nucleus	8.16e-05	0.00197	<0.20	4.08831	2.70553	1.38278	XPO4 (2.8)	KPNA3 (2.8)	C5orf41 (2.8)	FOXP1 (2.7)	LINC00477 (2.6)	CLOCK (2.6)	EIF2C2 (2.5)	ENSG00000182873 (2.4)	MAP3K3 (2.4)	ZC3H7B (2.4)
GO:0040008	regulation of growth	8.34e-05	0.08	<0.20	4.07883	1.09691	2.98192	CSH2 (5.3)	GH2 (5.1)	CRLF1 (3.3)	CHRNE (3.1)	KLHDC8B (3.0)	CRIM1 (2.9)	ADAMTSL3 (2.8)	ENSG00000259134 (2.7)	FGF18 (2.6)	PAM (2.6)
GO:0045121	membrane raft	8.4e-05	0.00694	<0.20	4.07572	2.15864	1.91708	EPAS1 (3.2)	CRIM1 (2.9)	ENTPD1 (2.9)	KCNIP2 (2.9)	GJA5 (2.8)	SLC8A1 (2.8)	SDPR (2.7)	GJA1 (2.7)	SUN1 (2.6)	KCTD10 (2.6)
GO:0048185	activin binding	8.79e-05	0.00465	<0.20	4.05601	2.33255	1.72346	GJA5 (4.0)	CTTNBP2NL (3.7)	ZMIZ1 (3.3)	EPAS1 (3.3)	PRKAB2 (3.2)	TMEM204 (3.0)	CRIM1 (2.9)	CTDSPL (2.9)	SKI (2.7)	CALHM2 (2.7)
GO:0048741	skeletal muscle fiber development	9.1e-05	0.00226	<0.20	4.04096	2.64589	1.39507	PITX3 (5.4)	CHRNE (3.9)	C20orf166 (3.8)	SYPL2 (3.7)	DUSP13 (3.5)	PPAPDC3 (3.3)	CCDC141 (3.2)	OBSL1 (3.2)	CORO6 (3.2)	OSBPL6 (3.0)
GO:0048645	organ formation	9.3e-05	0.00932	<0.20	4.03152	2.03058	2.00093	WT1-AS (5.4)	SEMA3D (3.4)	FGF18 (3.3)	MEIS1 (3.2)	ENSG00000253447 (3.1)	PITX3 (3.1)	COL13A1 (2.9)	ENSG00000237125 (2.9)	TCF21 (2.8)	WNT11 (2.8)
GO:0045597	positive regulation of cell differentiation	9.31e-05	0.01	<0.20	4.03105	2	2.03105	ID2 (3.1)	NFIA (3.1)	RFX4 (3.0)	LRCH1 (2.6)	CAMK2D (2.6)	ZMIZ1 (2.6)	MPPED2 (2.5)	ARHGEF40 (2.5)	ZNF358 (2.5)	TLE3 (2.4)
GO:0051493	regulation of cytoskeleton organization	9.35e-05	0.1	<0.20	4.02919	1	3.02919	FIGN (2.9)	LRRFIP2 (2.9)	ENSG00000253932 (2.8)	ENSG00000222872 (2.8)	PRKCZ (2.8)	SH3BGRL3 (2.7)	SEPT7 (2.7)	STRN (2.7)	ENSG00000253447 (2.7)	ENSG00000226674 (2.6)
GO:0044087	regulation of cellular component biogenesis	9.48e-05	0.02	<0.20	4.02319	1.69897	2.32422	ENSG00000253932 (3.3)	TMEM26 (2.8)	RHOA (2.6)	ENSG00000217075 (2.6)	ENSG00000237298 (2.6)	ENSG00000224080 (2.6)	USP4 (2.5)	PRKCZ (2.5)	MET (2.5)	BEND5 (2.4)
GO:0001076	RNA polymerase II transcription factor binding transcription factor activity	9.67e-05	0.05	<0.20	4.01457	1.30103	2.71354	C1orf35 (3.3)	C10orf76 (3.1)	SSH2 (3.0)	SLC8A1 (2.9)	BNIP1 (2.9)	TOB2 (2.9)	IRX3 (2.9)	TRIM32 (2.7)	SIPA1L2 (2.7)	ARID2 (2.6)
GO:0031329	regulation of cellular catabolic process	9.69e-05	0.17	<0.20	4.01368	0.769551	3.24413	PTK2 (3.5)	STRN (2.9)	BTRC (2.9)	EPS15 (2.7)	SHARPIN (2.7)	SSH2 (2.7)	C5orf41 (2.6)	SIPA1L2 (2.6)	DLG1 (2.5)	LRCH1 (2.4)
GO:0048641	regulation of skeletal muscle tissue development	0.000103	0.02	<0.20	3.98716	1.69897	2.28819	TOB2 (3.7)	PITX3 (3.7)	ENSG00000226688 (3.0)	NFIA (2.8)	BEND5 (2.8)	SSH2 (2.7)	CCDC141 (2.6)	SSPN (2.5)	POLL (2.5)	CCDC36 (2.4)
GO:0048754	branching morphogenesis of a tube	0.00011	0.00795	<0.20	3.95861	2.09963	1.85897	COL13A1 (4.3)	FREM2 (3.3)	FGF8 (3.3)	TBX3 (3.3)	NR2F1 (3.2)	DCBLD1 (3.2)	MMP11 (3.0)	ZNF503 (3.0)	CDH13 (3.0)	CACNA1D (2.9)
GO:0060090	binding, bridging	0.000121	0.06	<0.20	3.91721	1.22185	2.69537	NT5C2 (3.4)	AIM1L (3.3)	PLEC (2.8)	CAMK2D (2.7)	CD52 (2.4)	SESTD1 (2.4)	SEMA3D (2.4)	SH3BGRL3 (2.4)	ZFPM2 (2.4)	RAP2B (2.4)
GO:0071495	cellular response to endogenous stimulus	0.000121	0.49	<0.20	3.91721	0.309804	3.60741	C5orf41 (3.3)	CYP17A1 (3.3)	CCBE1 (3.2)	ZFPM1 (3.1)	CSH2 (3.1)	ENSG00000236155 (2.9)	TEF (2.8)	ENSG00000182873 (2.8)	GH2 (2.8)	ESR2 (2.6)
GO:0003705	RNA polymerase II distal enhancer sequence-specific DNA binding transcription factor activity	0.000122	0.05	<0.20	3.91364	1.30103	2.61261	ZNF503 (4.1)	FOXP1 (4.1)	MYOCD (3.7)	PITX3 (3.6)	ZNF358 (3.3)	TCF21 (3.2)	NR3C1 (3.1)	TBX3 (3.1)	NR2F1 (3.0)	SKI (2.8)
GO:0030308	negative regulation of cell growth	0.000125	0.0062	<0.20	3.90309	2.20761	1.69548	EID3 (3.1)	PLEKHA3 (3.1)	P4HTM (3.1)	ENSG00000231437 (2.7)	FGF5 (2.7)	FSIP2 (2.6)	EMILIN3 (2.6)	TSC22D2 (2.6)	ENSG00000249700 (2.5)	C3orf71 (2.5)
GO:0019903	protein phosphatase binding	0.000125	0.02	<0.20	3.90309	1.69897	2.20412	C10orf76 (3.8)	SCN5A (3.3)	SLC27A6 (2.8)	MYH7 (2.8)	TESC (2.8)	ASH1L (2.8)	SYNE2 (2.7)	NKX2-5 (2.5)	PCNXL3 (2.4)	ZNF592 (2.4)
GO:0003713	transcription coactivator activity	0.000125	0.03	<0.20	3.90309	1.52288	2.38021	ARID2 (3.8)	YY1AP1 (3.7)	SSBP3 (3.6)	EP300 (3.5)	KIAA0913 (3.4)	TOB2 (3.2)	SMARCB1 (3.2)	ZNF609 (3.1)	RELA (3.0)	QRICH1 (2.9)
GO:0008013	beta-catenin binding	0.000132	0.01	<0.20	3.87943	2	1.87943	SSBP3 (3.9)	PODXL (3.7)	TLE3 (3.5)	FAT1 (3.4)	FGFR2 (3.2)	DSP (3.1)	ZMIZ1 (2.9)	GBF1 (2.8)	ARID2 (2.8)	TBX3 (2.8)
GO:0044448	cell cortex part	0.000134	0.07	<0.20	3.8729	1.1549	2.71799	FHL2 (3.9)	OSBPL9 (3.3)	SPTBN1 (3.3)	ENSG00000230627 (3.1)	SH3BGRL3 (3.0)	PDLIM5 (3.0)	XPO7 (2.9)	ENSG00000238018 (2.9)	MACF1 (2.9)	FRMD4B (2.7)
GO:0051093	negative regulation of developmental process	0.000143	0.11	<0.20	3.84466	0.958607	2.88606	FGF18 (3.3)	SH3PXD2A (3.2)	ENSG00000231064 (3.2)	RFX4 (3.0)	ENSG00000250107 (2.8)	ZNF358 (2.6)	EFNA1 (2.6)	ZMIZ1 (2.5)	ID2 (2.5)	ARHGEF40 (2.5)
GO:0071363	cellular response to growth factor stimulus	0.000151	0.08	<0.20	3.82102	1.09691	2.72411	ZNF608 (3.7)	DLC1 (3.5)	CCBE1 (2.8)	ENSG00000230525 (2.8)	HSPG2 (2.7)	ENSG00000231437 (2.7)	GJA1 (2.6)	ARHGEF40 (2.6)	SCN11A (2.4)	FGFR1 (2.3)
GO:0016049	cell growth	0.000154	0.01	<0.20	3.81248	2	1.81248	CRIM1 (2.9)	LAMB2 (2.7)	TSC22D2 (2.5)	C5orf30 (2.4)	ENSG00000224080 (2.4)	CRLF1 (2.4)	CDH2 (2.4)	P4HTM (2.4)	PLEKHA3 (2.3)	EMILIN3 (2.3)
GO:0001085	RNA polymerase II transcription factor binding	0.000161	0.04	<0.20	3.79317	1.39794	2.39523	PKLR (4.6)	GP1BA (3.7)	FADS2 (3.3)	ID2 (3.2)	ZFPM2 (3.2)	NPR3 (3.0)	SDPR (3.0)	UBXN11 (2.9)	ZFPM1 (2.9)	LDB1 (2.7)
GO:0032403	protein complex binding	0.000161	0.09	<0.20	3.79317	1.04576	2.74742	HSPG2 (4.4)	TMEM204 (3.8)	GP1BA (3.5)	ITGAV (3.5)	DAG1 (3.4)	ITGB1 (3.1)	SKI (3.1)	PLEC (3.0)	SPTBN1 (3.0)	LAMB2 (3.0)
GO:0004690	cyclic nucleotide-dependent protein kinase activity	0.000165	0.08	<0.20	3.78252	1.09691	2.68561	PRKAB2 (4.3)	SLC8A1 (3.8)	CHRM2 (3.8)	TBX5 (3.7)	HCFC2 (3.6)	PRKCA (3.4)	PDLIM5 (3.3)	BEND7 (3.2)	KCTD10 (3.2)	SLC9A2 (3.2)
GO:0003211	cardiac ventricle formation	0.000166	0.00903	<0.20	3.77989	2.04431	1.73558	TBX20 (4.9)	KLHDC8B (4.6)	CHRM2 (4.3)	SCN5A (4.1)	ENSG00000237125 (4.1)	CCDC141 (3.3)	ENSG00000224080 (3.0)	MYOCD (3.0)	ZSCAN2 (2.9)	SLC8A1 (2.8)
GO:2000027	regulation of organ morphogenesis	0.000173	0.00415	<0.20	3.76195	2.38195	1.38	SEMA3D (3.3)	FGF8 (3.3)	ENSG00000231437 (3.2)	FREM2 (3.0)	TBX3 (3.0)	ZNF503 (2.9)	MSX2 (2.9)	ENSG00000253447 (2.8)	FGF18 (2.8)	WNT11 (2.7)
GO:0005539	glycosaminoglycan binding	0.000189	0.00558	<0.20	3.72354	2.25337	1.47017	DPT (6.0)	BPI (5.4)	THBS3 (4.3)	PDGFRL (4.2)	ADAMTSL3 (4.1)	FKBP7 (3.5)	FGF18 (3.4)	PRRX1 (3.3)	FGFR1 (3.2)	CRLF1 (3.2)
GO:0045445	myoblast differentiation	0.000197	0.00316	<0.20	3.70553	2.50031	1.20522	ENSG00000257407 (4.1)	PITX3 (3.2)	ENSG00000227839 (3.2)	TTC21A (2.7)	TMEM26 (2.7)	LPIN3 (2.5)	CRLF1 (2.5)	ENSG00000226688 (2.1)	DCBLD1 (2.1)	ENSG00000231064 (2.1)
GO:0004691	cAMP-dependent protein kinase activity	0.000206	0.12	<0.20	3.68613	0.920819	2.76531	PRKAB2 (3.7)	PDLIM5 (3.3)	SLC8A1 (3.1)	BEND7 (3.0)	HCFC2 (3.0)	CAMK2G (3.0)	KCTD10 (3.0)	RIC8B (3.0)	PRKAR2A (2.9)	PRKCA (2.8)
GO:0007369	gastrulation	0.000213	0.00488	<0.20	3.67162	2.31158	1.36004	FGF8 (5.9)	FGF5 (4.2)	BRD7P3 (3.6)	ENSG00000227839 (3.5)	ENSG00000248463 (3.3)	ENSG00000253447 (3.2)	PHLDB2 (2.9)	COL13A1 (2.7)	AIM1L (2.5)	SLC12A7 (2.5)
GO:0003197	endocardial cushion development	0.000217	0.04	<0.20	3.66354	1.39794	2.2656	ST7-AS1 (3.3)	SLC27A6 (3.2)	DCBLD1 (3.0)	HCN4 (3.0)	MSX2 (2.9)	TCF21 (2.8)	TBX20 (2.8)	GORASP1 (2.7)	SCN5A (2.7)	FBXW4 (2.7)
GO:0030674	protein binding, bridging	0.00022	0.1	<0.20	3.65758	1	2.65758	NT5C2 (3.2)	AIM1L (3.2)	PLEC (2.6)	SEMA3D (2.6)	CAMK2D (2.5)	PLCXD2 (2.4)	ZFPM2 (2.3)	SH3BGRL3 (2.3)	CHADL (2.3)	CD52 (2.3)
GO:0017022	myosin binding	0.000222	0.00937	<0.20	3.65365	2.02826	1.62539	MYH7 (7.9)	MYH6 (7.3)	TTN (7.1)	SYNPO2L (7.0)	SRL (6.9)	TRDN (6.6)	LDB3 (6.4)	MYOZ1 (6.2)	ENO3 (6.1)	CEFIP (5.4)
GO:0001947	heart looping	0.000225	0.00694	<0.20	3.64782	2.15864	1.48918	HCN4 (3.8)	TTC21A (2.9)	ENSG00000244967 (2.9)	PODXL (2.9)	PIH1D2 (2.8)	ENSG00000230627 (2.8)	ESR2 (2.7)	KLHDC8B (2.6)	ENSG00000237125 (2.5)	MYOCD (2.5)
GO:0061371	determination of heart left/right asymmetry	0.000225	0.00694	<0.20	3.64782	2.15864	1.48918	HCN4 (3.8)	TTC21A (2.9)	ENSG00000244967 (2.9)	PODXL (2.9)	PIH1D2 (2.8)	ENSG00000230627 (2.8)	ESR2 (2.7)	KLHDC8B (2.6)	ENSG00000237125 (2.5)	MYOCD (2.5)
GO:0001763	morphogenesis of a branching structure	0.000229	0.00475	<0.20	3.64016	2.32331	1.31686	COL13A1 (3.9)	FREM2 (3.8)	NR2F1 (3.7)	SRGAP1 (3.5)	FGF8 (3.3)	TBX3 (3.2)	CACNA1D (2.9)	DFNB59 (2.9)	ZNF503 (2.9)	DCBLD1 (2.8)
GO:0030178	negative regulation of Wnt receptor signaling pathway	0.000233	0.21	<0.20	3.63264	0.677781	2.95486	SEMA3D (3.7)	NKD2 (3.2)	TMEM26 (3.1)	SH3PXD2A (2.7)	PDZRN3 (2.7)	LPHN3 (2.7)	FLRT2 (2.7)	FGF8 (2.7)	FIGN (2.7)	CACNA1G (2.7)
GO:0042803	protein homodimerization activity	0.000235	0.03	<0.20	3.62893	1.52288	2.10605	OPN4 (4.1)	ZC3H7B (3.3)	ITGA9 (3.2)	ZFPM1 (3.1)	PKLR (2.8)	CAV1 (2.6)	ID2 (2.5)	TESC (2.5)	CX3CR1 (2.4)	SNX22 (2.4)
GO:0034504	protein localization to nucleus	0.000238	0.01	<0.20	3.62342	2	1.62342	C5orf41 (3.0)	FOXP1 (2.7)	KPNA3 (2.7)	ZC3H7B (2.6)	LINC00477 (2.5)	CLOCK (2.4)	MAP3K3 (2.4)	TSC22D2 (2.4)	XPO4 (2.3)	ENSG00000238018 (2.3)
GO:0010769	regulation of cell morphogenesis involved in differentiation	0.000239	0.09	<0.20	3.6216	1.04576	2.57584	ENSG00000240973 (3.3)	WNT9A (2.6)	NAV2 (2.6)	TAGLN3 (2.5)	C5orf13 (2.4)	CDH2 (2.4)	CCBE1 (2.4)	ENSG00000250107 (2.4)	SKI (2.3)	ZMIZ1 (2.3)
GO:0070412	R-SMAD binding	0.000246	0.01	<0.20	3.60906	2	1.60906	PLCD1 (4.0)	CSRNP1 (3.9)	ID2 (3.9)	KLHDC8B (3.2)	CCNL1 (3.2)	MKLN1 (3.0)	BMPR1A (2.6)	MAP3K3 (2.5)	ZFPM1 (2.5)	C5orf41 (2.5)
GO:0090090	negative regulation of canonical Wnt receptor signaling pathway	0.000257	0.08	<0.20	3.59007	1.09691	2.49316	SEMA3D (3.9)	ST7-OT4 (3.1)	ST7-AS1 (3.0)	ENSG00000235257 (2.9)	FLRT2 (2.9)	PDGFRL (2.8)	PDZRN3 (2.7)	ENSG00000231437 (2.7)	VILL (2.7)	SCN10A (2.7)
GO:0003156	regulation of organ formation	0.000267	0.01	<0.20	3.57349	2	1.57349	WT1-AS (4.7)	SEMA3D (3.5)	ENSG00000250682 (3.4)	ENSG00000237125 (3.3)	PITX3 (3.1)	ENSG00000251582 (2.9)	COL13A1 (2.8)	TBX3 (2.7)	WNT11 (2.6)	AIM1L (2.6)
GO:0051170	nuclear import	0.000273	0.00235	<0.20	3.56384	2.62893	0.934905	KPNA3 (2.9)	XPO4 (2.8)	C5orf41 (2.8)	FOXP1 (2.7)	EIF2C2 (2.6)	LINC00477 (2.5)	ENSG00000182873 (2.5)	CLOCK (2.4)	MAP3K3 (2.3)	ASH1L (2.3)
GO:0061138	morphogenesis of a branching epithelium	0.000273	0.00901	<0.20	3.56384	2.04528	1.51856	COL13A1 (3.5)	TBX3 (3.3)	FREM2 (3.3)	NR2F1 (3.2)	FGF8 (3.1)	SRGAP1 (3.1)	TCF21 (3.1)	DCBLD1 (2.9)	ENSG00000248463 (2.9)	DFNB59 (2.8)
GO:0030278	regulation of ossification	0.00028	0.07	<0.20	3.55284	1.1549	2.39794	ENSG00000231064 (3.8)	FGFR1 (3.0)	PDZRN3 (3.0)	ID2 (3.0)	PLCD1 (3.0)	WNT11 (3.0)	TMEM26 (2.8)	SEMA3D (2.7)	ARHGEF40 (2.6)	FGFR2 (2.6)
GO:0048659	smooth muscle cell proliferation	0.000293	0.00453	<0.20	3.53313	2.3439	1.18923	CCNL1 (3.2)	CSRNP1 (2.9)	ENSG00000231437 (2.8)	LINC00477 (2.5)	TMEM204 (2.4)	ENSG00000222872 (2.3)	EXOG (2.3)	ENSG00000250062 (2.2)	HOMEZ (2.2)	ENSG00000226674 (2.1)
GO:0003207	cardiac chamber formation	0.000295	0.00933	<0.20	3.53018	2.03012	1.50006	CHRM2 (5.4)	TBX20 (4.9)	KLHDC8B (4.8)	SCN5A (4.2)	ENSG00000237125 (3.9)	CCDC141 (3.7)	SLC8A1 (3.5)	ENSG00000253932 (3.3)	MYOCD (3.2)	SIPA1L2 (3.0)
GO:0003682	chromatin binding	0.000313	0.16	<0.20	3.50446	0.79588	2.70858	SCAF11 (3.8)	ACVR2B (3.8)	TLE3 (3.4)	NR2F1 (3.4)	ARID2 (3.2)	ZNF219 (3.1)	FBXO11 (3.0)	QRICH1 (3.0)	SSBP3 (3.0)	CBX8 (2.9)
GO:0048638	regulation of developmental growth	0.000318	0.18	<0.20	3.49757	0.744727	2.75285	SEMA3D (3.7)	NPR3 (3.2)	FLRT2 (3.1)	ENSG00000227839 (3.1)	NFIA (3.1)	PITX3 (3.0)	ZFPM2 (2.9)	ENSG00000250107 (2.9)	FGF18 (2.8)	CHRNE (2.8)
GO:0001871	pattern binding	0.000328	0.00376	<0.20	3.48413	2.42481	1.05931	DPT (6.0)	BPI (5.7)	THBS3 (4.5)	ADAMTSL3 (4.1)	PDGFRL (4.0)	FGF18 (3.6)	CRLF1 (3.6)	FKBP7 (3.4)	DLC1 (3.3)	PRRX1 (3.3)
GO:0030247	polysaccharide binding	0.000328	0.00376	<0.20	3.48413	2.42481	1.05931	DPT (6.0)	BPI (5.7)	THBS3 (4.5)	ADAMTSL3 (4.1)	PDGFRL (4.0)	FGF18 (3.6)	CRLF1 (3.6)	FKBP7 (3.4)	DLC1 (3.3)	PRRX1 (3.3)
GO:0031256	leading edge membrane	0.000328	0.00854	<0.20	3.48413	2.06854	1.41558	FAT1 (4.4)	DTNA (4.2)	FREM2 (3.8)	BMPR1A (3.4)	KIAA0754 (3.2)	CX3CR1 (3.0)	DAG1 (3.0)	GJA5 (2.7)	SRGAP1 (2.7)	ITGAV (2.7)
GO:0009799	specification of symmetry	0.000345	0.00997	<0.20	3.46218	2.0013	1.46088	TTC21A (4.7)	PIH1D2 (4.7)	IFT88 (4.7)	DLEC1 (3.6)	ENSG00000230627 (3.2)	WDR73 (3.0)	HCN4 (2.8)	RCBTB1 (2.7)	NMU (2.6)	DPCD (2.6)
GO:0001704	formation of primary germ layer	0.000346	0.00702	<0.20	3.46092	2.15366	1.30726	FGF8 (5.1)	FGF5 (3.5)	PHLDB2 (3.4)	COL13A1 (3.4)	ENSG00000253447 (3.3)	AIM1L (3.2)	ENSG00000230525 (3.0)	SPATC1 (2.9)	HCN4 (2.8)	FBXW4 (2.7)
GO:0045667	regulation of osteoblast differentiation	0.000346	0.1	<0.20	3.46092	1	2.46092	ENSG00000231064 (4.0)	ID2 (3.7)	PDZRN3 (3.1)	FGFR2 (2.9)	FGFR1 (2.9)	WNT11 (2.9)	TMEM26 (2.6)	FREM2 (2.5)	PLCD1 (2.5)	SEMA3D (2.4)
GO:0042826	histone deacetylase binding	0.000352	0.02	<0.20	3.45346	1.69897	1.75449	ZMIZ1 (4.1)	ARID2 (3.6)	C5orf41 (3.4)	EP300 (3.2)	RNF167 (3.0)	HLX (2.9)	UBE3B (2.8)	SMARCB1 (2.8)	ITGA9 (2.6)	NKX2-5 (2.5)
GO:0016775	phosphotransferase activity, nitrogenous group as acceptor	0.000357	0.01	<0.20	3.44733	2	1.44733	OBSCN (4.9)	TRDN (4.2)	ENO3 (4.1)	TTN (3.8)	LDB3 (3.8)	SRL (3.8)	FGF12 (3.7)	ADCK3 (3.7)	PPAPDC3 (3.6)	RYR2 (3.6)
GO:0042056	chemoattractant activity	0.00037	0.00278	<0.20	3.4318	2.55596	0.875843	NPR3 (4.2)	TCF21 (3.4)	PRRX1 (3.0)	WNT11 (2.9)	ZNF503 (2.9)	PPARGC1A (2.8)	ADAMTSL3 (2.8)	ENSG00000237125 (2.8)	CDKN2C (2.7)	TBX5 (2.6)
GO:0005072	transforming growth factor beta receptor, cytoplasmic mediator activity	0.000371	0.02	<0.20	3.43063	1.69897	1.73166	ID2 (8.1)	SKI (4.3)	EFNA1 (3.9)	TBX3 (3.9)	NR3C1 (3.9)	NPR3 (3.6)	ZMIZ1 (3.6)	FAM59A (3.2)	TBX20 (3.1)	CALHM2 (3.1)
GO:0003179	heart valve morphogenesis	0.000382	0.05	<0.20	3.41794	1.30103	2.11691	TBX20 (4.1)	ENSG00000253932 (4.0)	SLC27A6 (3.9)	NKX2-5 (3.2)	ENSG00000237298 (2.9)	ENSG00000250107 (2.8)	ENSG00000257711 (2.7)	MPPED2 (2.6)	CCDC141 (2.5)	ENSG00000231064 (2.5)
GO:0048568	embryonic organ development	0.000407	0.02	<0.20	3.39041	1.69897	1.69144	WNT11 (3.4)	ZNF503 (3.2)	FGF8 (3.0)	IRX3 (2.9)	FGF18 (2.9)	MSX2 (2.8)	NR2F1 (2.6)	ENSG00000227839 (2.6)	MEIS1 (2.5)	DMRTA2 (2.5)
GO:0045596	negative regulation of cell differentiation	0.000415	0.07	<0.20	3.38195	1.1549	2.22705	SH3PXD2A (3.6)	FGF18 (3.4)	ZNF358 (3.1)	ENSG00000231064 (3.1)	RFX4 (3.0)	TLE3 (2.9)	ID2 (2.8)	ZMIZ1 (2.8)	CRAMP1L (2.7)	ACVR2B (2.5)
GO:0016528	sarcoplasm	0.000423	0.00285	<0.20	3.37366	2.54516	0.828504	MYOZ1 (9.4)	TRDN (8.4)	TTN (8.3)	CEFIP (7.9)	DUSP13 (7.8)	LDB3 (7.8)	ENO3 (7.5)	SYPL2 (7.4)	DES (7.3)	OBSCN (7.0)
GO:0019199	transmembrane receptor protein kinase activity	0.000433	0.04	<0.20	3.36351	1.39794	1.96557	FLRT2 (5.1)	PODXL (4.8)	GJA1 (3.7)	EPAS1 (3.7)	FGFR2 (3.4)	DLC1 (3.4)	TMEM204 (3.3)	HSPG2 (3.3)	COL13A1 (3.2)	MTUS1 (3.2)
GO:0009855	determination of bilateral symmetry	0.000462	0.01	<0.20	3.33536	2	1.33536	PIH1D2 (4.7)	TTC21A (4.7)	IFT88 (4.7)	DLEC1 (3.6)	ENSG00000230627 (3.2)	WDR73 (3.0)	HCN4 (2.6)	RCBTB1 (2.6)	DPCD (2.6)	ENSG00000231437 (2.5)
GO:0048589	developmental growth	0.000465	0.06	<0.20	3.33255	1.22185	2.1107	KIAA1755 (3.3)	SEMA3A (3.2)	PITX3 (3.0)	ENSG00000231064 (2.9)	MMP11 (2.9)	MPPED2 (2.8)	SH3PXD2A (2.8)	TBX5 (2.7)	WNT11 (2.7)	ARHGEF40 (2.6)
GO:0019838	growth factor binding	0.000485	0.04	<0.20	3.31426	1.39794	1.91632	TMEM204 (5.2)	HSPG2 (5.1)	EPAS1 (5.0)	GJA1 (4.3)	LAMB2 (4.3)	FKBP7 (4.1)	CRLF1 (4.0)	DAG1 (3.9)	PODXL (3.7)	CRIM1 (3.7)
GO:0005161	platelet-derived growth factor receptor binding	0.000489	0.1	<0.20	3.31069	1	2.31069	PRRX1 (3.6)	GP1BA (3.5)	ITGAV (3.5)	TCF21 (3.3)	SDPR (3.0)	FNDC3B (2.8)	TMEM204 (2.7)	MEIS1 (2.7)	FGFR1 (2.7)	TMEM26 (2.7)
GO:0055012	ventricular cardiac muscle cell differentiation	0.000531	0.07	<0.20	3.27491	1.1549	2.12	LINC00477 (4.4)	TBX20 (4.0)	CCDC141 (3.5)	PDE3A (3.4)	ENSG00000250682 (3.4)	MPPED2 (3.2)	SLC8A1 (3.0)	KLHDC8B (2.9)	ENSG00000257726 (2.8)	LRRFIP2 (2.7)
GO:0003170	heart valve development	0.000537	0.09	<0.20	3.27003	1.04576	2.22427	ENSG00000253932 (4.3)	TBX20 (4.0)	SLC27A6 (3.8)	NKX2-5 (3.2)	ENSG00000237298 (3.0)	C16orf73 (2.9)	CCDC141 (2.7)	ENSG00000250107 (2.7)	ENSG00000257711 (2.6)	ENSG00000234699 (2.5)
GO:0004722	protein serine/threonine phosphatase activity	0.000571	0.02	<0.20	3.24336	1.69897	1.54439	STK11 (4.0)	FBXO11 (3.9)	MARK3 (2.9)	ARIH2 (2.9)	EPS15 (2.9)	PRKAR2A (2.8)	XPO7 (2.8)	HPS6 (2.7)	SPSB3 (2.7)	MAP3K3 (2.6)
GO:0016922	ligand-dependent nuclear receptor binding	0.000573	0.06	<0.20	3.24185	1.22185	2.02	EP300 (4.7)	ZNF592 (3.6)	EIF2C2 (3.2)	CLOCK (3.1)	UBE3B (3.0)	CHD6 (2.9)	ZSCAN2 (2.7)	ZNF609 (2.7)	CSNK1G1 (2.7)	STRN (2.7)
GO:0050431	transforming growth factor beta binding	0.00059	0.00349	<0.20	3.22915	2.45717	0.771973	EPAS1 (4.8)	TMEM204 (4.3)	SDPR (4.1)	TCF21 (3.8)	HSPG2 (3.6)	CALHM2 (3.6)	FKBP7 (3.4)	SLC8A1 (3.3)	CAV1 (3.2)	DPT (3.0)
GO:0045668	negative regulation of osteoblast differentiation	0.000591	0.1	<0.20	3.22841	1	2.22841	ENSG00000231064 (4.2)	FOXP1-AS1 (3.7)	CBX8 (3.5)	RPL21P2 (3.2)	SUN1 (3.2)	CHRM2 (3.2)	FGF5 (2.8)	EID3 (2.6)	ID2 (2.6)	XPC (2.5)
GO:0060840	artery development	0.000591	0.12	<0.20	3.22841	0.920819	2.30759	KIAA1755 (3.8)	IRX3 (3.2)	NKD2 (3.2)	DIXDC1 (3.1)	ID2 (3.0)	FGF8 (3.0)	FBXW4 (2.9)	ENSG00000248463 (2.8)	ZNF358 (2.6)	ENSG00000229589 (2.6)
GO:0060590	ATPase regulator activity	0.000612	0.18	<0.20	3.21325	0.744727	2.46852	ADPRHL1 (4.5)	NKX2-5 (4.5)	RYR2 (3.8)	MYH6 (3.7)	MYOCD (3.3)	FHL2 (3.0)	MYH7 (2.9)	SLC8A1 (2.9)	MRPL55 (2.8)	TESC (2.8)
GO:0031594	neuromuscular junction	0.000627	0.0099	<0.20	3.20273	2.00436	1.19837	DUSP13 (6.4)	PITX3 (6.2)	SYNPO2L (4.7)	CORO6 (4.4)	CEFIP (4.1)	WNT9A (3.9)	DES (3.8)	SYPL2 (3.7)	NEURL (3.5)	SRL (3.5)
GO:0016529	sarcoplasmic reticulum	0.000629	0.00301	<0.20	3.20135	2.52143	0.679916	MYOZ1 (9.6)	TRDN (8.5)	TTN (8.5)	CEFIP (7.9)	DUSP13 (7.8)	LDB3 (7.7)	SYPL2 (7.4)	ENO3 (7.4)	DES (7.3)	SRL (7.0)
GO:0032982	myosin filament	0.000632	0.0076	<0.20	3.19928	2.11919	1.0801	TTN (11.3)	MYOZ1 (11.0)	TRDN (10.7)	SRL (9.7)	LDB3 (9.5)	SYNPO2L (9.2)	ENO3 (8.9)	DES (7.8)	MYH7 (7.6)	OBSCN (7.3)
GO:0045765	regulation of angiogenesis	0.000635	0.34	<0.20	3.19723	0.468521	2.72871	ZNF683 (3.4)	PDE3A (2.8)	MYO1H (2.8)	ENSG00000226688 (2.7)	ARHGEF40 (2.6)	ITGA9 (2.6)	PI16 (2.5)	TMEM204 (2.5)	ZFPM2 (2.5)	ENSG00000249816 (2.4)
GO:0034329	cell junction assembly	0.000642	0.02	<0.20	3.19246	1.69897	1.49349	KIAA0754 (4.4)	C1orf98 (3.5)	TES (3.5)	HSPG2 (3.2)	ENSG00000238018 (3.2)	MET (3.2)	PHLDB2 (3.2)	COL17A1 (3.2)	CAV2 (3.0)	RBPMS (3.0)
GO:0007389	pattern specification process	0.000657	0.01	<0.20	3.18243	2	1.18243	ZNF503 (3.8)	FGF8 (3.6)	IRX3 (3.3)	ENSG00000250107 (2.8)	ENSG00000227839 (2.7)	FGF18 (2.7)	NKD2 (2.6)	MSX2 (2.5)	ATXN7L2 (2.4)	MLNR (2.4)
GO:0044057	regulation of system process	0.000678	0.00162	<0.20	3.16877	2.79048	0.378285	C20orf166 (3.5)	ADPRHL1 (3.5)	AKAP6 (3.2)	FGF12 (3.2)	SIPA1L2 (3.2)	SLC8A1 (3.1)	TMEM182 (2.9)	SPEG (2.9)	PDE3A (2.8)	HCN1 (2.8)
GO:0005865	striated muscle thin filament	0.000729	0.02	<0.20	3.13727	1.69897	1.4383	TTN (11.5)	MYOZ1 (11.1)	TRDN (10.8)	ENO3 (10.4)	MYH7 (10.0)	SYNPO2L (8.9)	LDB3 (8.7)	SRL (8.3)	CEFIP (7.8)	DES (7.2)
GO:0001649	osteoblast differentiation	0.000755	0.11	<0.20	3.12205	0.958607	2.16345	WNT11 (3.3)	ID2 (3.2)	NKD2 (3.1)	SEMA3D (3.1)	FGFR1 (3.1)	FGFR2 (3.0)	TMEM26 (3.0)	MSX2 (2.6)	CACNA1G (2.6)	ARHGEF40 (2.6)
GO:0060429	epithelium development	0.000772	0.07	<0.20	3.11238	1.1549	1.95748	SRGAP1 (3.3)	AIM1L (3.2)	ZNF503 (2.9)	COL17A1 (2.9)	IRX3 (2.8)	FREM2 (2.8)	KCNK7 (2.8)	MSX2 (2.6)	DSP (2.6)	ENSG00000248463 (2.5)
GO:0017147	Wnt-protein binding	0.000833	0.07	<0.20	3.07935	1.1549	1.92445	PDZRN3 (5.4)	PDGFRL (5.1)	FGFR1 (4.7)	BMPR1A (4.2)	SSPN (3.7)	FGFR2 (3.6)	ITGA9 (3.5)	MMP11 (3.2)	FGF18 (3.1)	PRRX1 (3.0)
GO:0070603	SWI/SNF-type complex	0.000851	0.03	<0.20	3.07007	1.52288	1.54719	SSBP3 (4.2)	ZC3H7B (3.2)	TMEM198 (3.1)	EP300 (3.1)	ANKRD13B (3.1)	QRICH1 (3.0)	ARID2 (2.9)	KPNA3-IT1 (2.9)	SCAF11 (2.9)	IP6K2 (2.9)
GO:0048471	perinuclear region of cytoplasm	0.000853	0.16	<0.20	3.06905	0.79588	2.27317	MOBP (3.7)	CRYAB (3.1)	ITGB1 (3.0)	DLG1 (2.9)	EPS15 (2.8)	MAP7D1 (2.7)	ADCY5 (2.7)	SLC27A6 (2.7)	PLCD1 (2.7)	C11orf9 (2.7)
GO:0051272	positive regulation of cellular component movement	0.000867	0.04	<0.20	3.06198	1.39794	1.66404	CCBE1 (3.6)	PHLDB2 (2.9)	PRRX1 (2.7)	GJA1 (2.7)	DLC1 (2.6)	FERMT2 (2.5)	C1orf98 (2.5)	ITGA9 (2.5)	ST7-AS1 (2.4)	DCBLD1 (2.4)
GO:0045165	cell fate commitment	0.000891	0.08	<0.20	3.05012	1.09691	1.95321	DMRTA2 (5.0)	PITX3 (4.2)	MLNR (4.2)	LINC00477 (3.4)	BMP8A (3.0)	ENSG00000253447 (2.9)	MPPED2 (2.8)	IRX3 (2.8)	ZNF219 (2.7)	ENSG00000227839 (2.6)
GO:0048660	regulation of smooth muscle cell proliferation	0.000902	0.00767	<0.20	3.04479	2.1152	0.929589	CCNL1 (3.3)	CSRNP1 (3.0)	ENSG00000231437 (2.7)	EXOG (2.5)	ENSG00000222872 (2.3)	LINC00477 (2.3)	ST7-AS1 (2.2)	HOMEZ (2.2)	TMEM204 (2.1)	ENSG00000226674 (2.1)
GO:0030512	negative regulation of transforming growth factor beta receptor signaling pathway	0.00092	0.08	<0.20	3.03621	1.09691	1.9393	FOXP1-AS1 (3.7)	ENSG00000257726 (3.1)	FUT11 (3.1)	MYOCD (2.9)	ENSG00000236155 (2.7)	EMB (2.7)	MMP11 (2.6)	CRLF1 (2.5)	SKI (2.5)	GH2 (2.5)
GO:0005104	fibroblast growth factor receptor binding	0.000944	0.00603	<0.20	3.02503	2.21968	0.805345	WNT11 (5.1)	CCBE1 (4.0)	SCN5A (3.8)	NPR3 (3.4)	DLC1 (3.3)	FGFR1 (3.0)	MSX2 (3.0)	SLC8A1 (2.9)	CHRM2 (2.8)	PRRX1 (2.8)
GO:0040017	positive regulation of locomotion	0.000982	0.04	<0.20	3.00789	1.39794	1.60995	CCBE1 (3.6)	PHLDB2 (2.9)	PRRX1 (2.8)	GJA1 (2.8)	DLC1 (2.7)	CAV1 (2.5)	NAV2 (2.5)	FERMT2 (2.5)	SCAND2 (2.4)	FLRT2 (2.3)
GO:0051427	hormone receptor binding	0.000989	0.00718	<0.20	3.0048	2.14388	0.860928	EP300 (4.0)	DDX42 (3.6)	USP28 (3.4)	QRICH1 (3.2)	GH2 (3.0)	SCAF11 (2.9)	SLC27A6 (2.9)	OBSL1 (2.8)	ZMIZ1 (2.7)	NR3C1 (2.7)
GO:0060538	skeletal muscle organ development	0.00104	0.01	<0.20	2.98297	2	0.982967	PITX3 (7.3)	C20orf166 (5.6)	SYPL2 (4.9)	DUSP13 (4.8)	CORO6 (3.5)	CHRNE (3.3)	OBSL1 (3.3)	CEFIP (3.3)	PPAPDC3 (3.3)	ENSG00000226688 (3.2)
GO:0001558	regulation of cell growth	0.00104	0.04	<0.20	2.98297	1.39794	1.58503	CHRNE (3.1)	P4HTM (2.9)	EMILIN3 (2.8)	CRLF1 (2.7)	CRIM1 (2.6)	LAMB2 (2.6)	CDH13 (2.5)	FGF5 (2.4)	TSC22D2 (2.4)	CDH2 (2.4)
GO:0035023	regulation of Rho protein signal transduction	0.00109	0.12	<0.20	2.96257	0.920819	2.04175	AIM1L (3.8)	ENSG00000243629 (2.9)	ENSG00000259359 (2.8)	MGAT5 (2.7)	CTTNBP2NL (2.5)	ENSG00000227839 (2.4)	SPATC1 (2.3)	TRAK1 (2.2)	SIPA1 (2.2)	STRN (2.2)
GO:0050840	extracellular matrix binding	0.0011	0.27	<0.20	2.95861	0.568636	2.38997	HSPG2 (6.6)	TMEM204 (5.1)	MMP11 (4.4)	LAMB2 (4.2)	CAV1 (4.1)	ITGAV (4.1)	FKBP7 (3.9)	DAG1 (3.9)	CRYAB (3.8)	PODXL (3.5)
Mouse knockout phenotype catogories
MP:0000274	enlarged heart	7.13e-16	8.8e-06	<0.01	15.1469	5.05552	10.0914	MYH6 (7.9)	NKX2-5 (6.3)	SLC8A1 (5.4)	SCN5A (5.3)	ADPRHL1 (5.3)	MYH7 (5.2)	TBX20 (5.2)	RYR2 (5.2)	PLN (5.2)	XIRP1 (5.1)
MP:0002652	thin myocardium	1.14e-15	6.68e-06	<0.01	14.9431	5.17522	9.76787	NKX2-5 (4.3)	GOLGA4 (3.5)	MYH6 (3.3)	PLN (3.3)	C11orf9 (3.3)	PDLIM5 (3.2)	ADAMTSL3 (3.1)	ENSG00000237125 (3.0)	SLC8A1 (3.0)	TBX20 (3.0)
MP:0010402	ventricular septal defect	3.32e-15	3.13e-06	<0.01	14.4789	5.50446	8.97441	CDH2 (3.8)	ZMIZ1 (3.8)	C5orf13 (3.3)	FLRT2 (3.3)	FAT1 (3.2)	NKX2-5 (3.2)	PODXL (3.1)	ID2 (3.0)	TSC22D2 (3.0)	DLC1 (3.0)
MP:0011098	complete embryonic lethality during organogenesis	2.66e-14	8.94e-08	<0.01	13.5751	7.04866	6.52646	PODXL (4.5)	TBX5 (4.1)	EPAS1 (3.9)	NKX2-5 (3.7)	TBX3 (3.7)	COL13A1 (3.6)	SIPA1L2 (3.3)	DLC1 (3.3)	SLC8A1 (3.3)	ZNF592 (3.2)
MP:0000267	abnormal heart development	3.81e-14	2.59e-06	<0.01	13.4191	5.5867	7.83237	PODXL (5.2)	TBX20 (5.1)	ENSG00000237125 (4.7)	GJA5 (4.6)	CDH2 (4.5)	NKX2-5 (4.2)	MYH6 (4.2)	ZFPM2 (4.0)	EPAS1 (4.0)	RBPMS2 (3.8)
MP:0005312	pericardial effusion	5.99e-14	8.01e-05	<0.01	13.2226	4.09637	9.12621	MYH6 (6.1)	RYR2 (5.9)	SLC8A1 (5.0)	NKX2-5 (4.8)	TBX20 (4.4)	PLN (4.3)	TBX5 (4.2)	SCN5A (4.0)	CSDC2 (4.0)	CCDC141 (4.0)
MP:0001544	abnormal cardiovascular system physiology	1.09e-13	6.19e-05	<0.01	12.9626	4.20831	8.75426	MYH6 (7.9)	PLN (7.1)	ADPRHL1 (6.7)	SLC8A1 (6.7)	NKX2-5 (6.5)	TBX5 (6.2)	RYR2 (6.0)	GJA5 (5.7)	MYH7 (5.3)	XIRP1 (5.0)
MP:0000266	abnormal heart morphology	1.47e-13	0.000117	<0.01	12.8327	3.93181	8.90087	MYH6 (5.6)	TBX20 (5.4)	TBX5 (4.9)	NKX2-5 (4.7)	SCN5A (4.6)	PLN (4.5)	MYH7 (4.1)	ADPRHL1 (4.0)	RYR2 (4.0)	PDLIM5 (4.0)
MP:0005140	decreased cardiac muscle contractility	6.96e-13	1.96e-05	<0.01	12.1574	4.70774	7.44965	MYH6 (8.4)	XIRP1 (7.1)	PLN (6.8)	SYNPO2L (6.8)	NKX2-5 (6.8)	MYH7 (6.7)	ADPRHL1 (6.7)	LDB3 (6.5)	TMEM182 (6.4)	SCN5A (6.3)
MP:0005294	abnormal heart ventricle morphology	1.63e-12	7.32e-05	<0.01	11.7878	4.13549	7.65232	SLC8A1 (6.5)	MYH6 (6.5)	RYR2 (6.4)	NKX2-5 (5.9)	TBX20 (5.4)	PDE3A (5.3)	ADPRHL1 (5.3)	TBX5 (5.2)	MYH7 (5.0)	SYNPO2L (4.8)
MP:0000280	thin ventricular wall	1.83e-12	9.79e-06	<0.01	11.7375	5.00922	6.72833	MYOCD (5.2)	PLN (4.8)	TBX20 (4.5)	GJA5 (4.0)	NKX2-5 (3.8)	ID2 (3.7)	CAV2 (3.7)	DES (3.7)	TBX3 (3.6)	TBX5 (3.5)
MP:0010403	atrial septal defect	2.14e-12	2.51e-07	<0.01	11.6696	6.60033	5.06926	MYOCD (4.3)	HCN4 (4.3)	CDH2 (4.0)	RBPMS (3.8)	EP300 (3.8)	SLC8A1 (3.8)	RYR2 (3.7)	PLN (3.6)	TBX20 (3.5)	RBPMS2 (3.5)
MP:0005329	abnormal myocardium layer morphology	2.3e-12	1.28e-05	<0.01	11.6383	4.89279	6.74548	MYH6 (6.6)	SCN5A (6.3)	MYH7 (6.2)	ADPRHL1 (5.8)	RYR2 (5.6)	SYNPO2L (5.2)	NKX2-5 (5.1)	SRL (4.9)	TBX5 (4.9)	XIRP1 (4.7)
MP:0002833	increased heart weight	2.39e-12	0.000137	<0.01	11.6216	3.86328	7.75832	PLN (8.4)	MYH6 (8.0)	ADPRHL1 (7.1)	XIRP1 (7.1)	MYH7 (6.6)	SLC8A1 (6.3)	NKX2-5 (6.2)	TMEM182 (6.1)	RYR2 (6.1)	DES (6.0)
MP:0008788	abnormal fetal cardiomyocyte morphology	2.58e-12	0.000634	<0.05	11.5884	3.19791	8.39047	ENSG00000237125 (6.1)	TBX5 (5.3)	GJA5 (4.8)	NKX2-5 (4.8)	TBX20 (4.7)	MYH6 (4.7)	ZFPM2 (4.3)	MYOCD (3.8)	CSDC2 (3.7)	OBSL1 (3.7)
MP:0001785	edema	3.04e-12	1.19e-05	<0.01	11.5171	4.92445	6.59267	PODXL (5.5)	ZFPM2 (4.3)	SDPR (4.2)	GJA5 (4.1)	WT1-AS (4.0)	HSPG2 (3.7)	EPAS1 (3.6)	FLRT2 (3.5)	ITGB1 (3.5)	TBX5 (3.4)
MP:0003921	abnormal heart left ventricle morphology	8.89e-12	0.000159	<0.01	11.0511	3.7986	7.2525	TBX20 (6.6)	NKX2-5 (6.6)	MYH6 (6.5)	MYH7 (5.2)	RYR2 (5.1)	SCN5A (4.9)	PLN (4.8)	TBX5 (4.7)	XIRP1 (4.4)	SLC8A1 (4.3)
MP:0000295	trabecula carnea hypoplasia	1.65e-11	0.000144	<0.01	10.7825	3.84164	6.94088	MYH6 (5.5)	TBX20 (5.2)	NKX2-5 (5.0)	TBX5 (4.6)	GJA5 (3.8)	ALPK3 (3.4)	PDLIM5 (3.4)	SCN5A (3.4)	MYH7 (3.3)	SKI (3.3)
MP:0002753	dilated heart left ventricle	2e-11	3.57e-05	<0.01	10.699	4.44733	6.25164	PLN (8.4)	MYH6 (7.6)	MYH7 (6.9)	SYNPO2L (6.7)	XIRP1 (6.6)	SRL (6.4)	LDB3 (6.4)	ADPRHL1 (6.0)	CEFIP (5.7)	TBX20 (5.6)
MP:0002972	abnormal cardiac muscle contractility	2.1e-11	0.000869	<0.05	10.6778	3.06098	7.6168	MYH6 (8.7)	SYNPO2L (8.0)	ADPRHL1 (7.6)	MYH7 (7.5)	CEFIP (7.3)	XIRP1 (7.1)	OBSCN (6.9)	LDB3 (6.8)	TMEM182 (6.5)	RYR2 (6.4)
MP:0002953	thick ventricular wall	4.9e-11	2.31e-05	<0.01	10.3098	4.63639	5.67342	PLN (7.0)	ADPRHL1 (6.8)	MYH6 (6.4)	LDB3 (5.9)	MYH7 (5.8)	RYR2 (5.4)	TBX5 (5.3)	SYNPO2L (5.3)	SLC8A1 (5.3)	XIRP1 (5.1)
MP:0003140	dilated heart atrium	5.6e-11	0.00145	<0.20	10.2518	2.83863	7.41318	SLC8A1 (7.1)	PLN (6.0)	TBX20 (5.7)	RYR2 (5.7)	NKX2-5 (5.6)	ADPRHL1 (5.3)	SCN5A (5.3)	MYH6 (5.1)	ITGA9 (4.5)	MYH7 (4.5)
MP:0003141	cardiac fibrosis	7.29e-11	8.81e-05	<0.01	10.1373	4.05502	6.08225	PLN (7.0)	ADPRHL1 (6.9)	SYNPO2L (6.4)	XIRP1 (6.3)	MYH6 (6.2)	MYH7 (6.0)	SRL (5.4)	LDB3 (5.4)	TTN (5.2)	TMEM182 (5.2)
MP:0006138	congestive heart failure	1.02e-10	0.000261	<0.05	9.9914	3.58336	6.40804	PLN (6.0)	SLC8A1 (5.4)	MYH6 (5.1)	NKX2-5 (5.0)	RYR2 (5.0)	GJA5 (4.4)	PDE3A (4.0)	DLC1 (4.0)	SORBS1 (3.8)	TBX5 (3.7)
MP:0002795	dilated cardiomyopathy	1.32e-10	4.83e-06	<0.01	9.87943	5.31605	4.56337	PLN (8.2)	MYH7 (7.3)	SYNPO2L (7.2)	XIRP1 (6.9)	LDB3 (6.6)	MYH6 (6.5)	SRL (6.1)	DES (6.0)	ADPRHL1 (5.9)	CEFIP (5.9)
MP:0000278	abnormal myocardial fiber morphology	1.36e-10	0.000558	<0.05	9.86646	3.25337	6.6131	MYH6 (9.4)	SYNPO2L (8.4)	LDB3 (8.0)	ADPRHL1 (8.0)	MYH7 (8.0)	PLN (7.6)	SRL (7.1)	NKX2-5 (6.9)	XIRP1 (6.9)	RYR2 (6.9)
MP:0000269	abnormal heart looping	1.42e-10	2.69e-05	<0.01	9.84771	4.57025	5.27746	ENSG00000237125 (6.0)	TBX5 (4.8)	CDH2 (4.7)	MSX2 (4.5)	FGF8 (4.5)	TBX20 (4.3)	MYH6 (4.1)	HCN4 (3.9)	RYR2 (3.8)	RBPMS2 (3.7)
MP:0010724	thick interventricular septum	1.46e-10	0.000206	<0.01	9.83565	3.68613	6.14951	MYH6 (4.6)	ADPRHL1 (4.6)	NKX2-5 (4.0)	PLN (3.9)	MYH7 (3.9)	TBX20 (3.8)	RYR2 (3.5)	LDB3 (3.3)	CAV2 (3.3)	STK11 (3.3)
MP:0004251	failure of heart looping	1.68e-10	0.00519	<0.20	9.77469	2.28483	7.48986	TBX20 (4.2)	MYH6 (3.9)	MYOCD (3.8)	SCN5A (3.6)	SLC8A1 (3.4)	SKI (3.3)	ARHGEF40 (3.2)	NKX2-5 (3.0)	WNT11 (2.9)	TBX5 (2.9)
MP:0003984	embryonic growth retardation	2.25e-10	1.19e-06	<0.01	9.64782	5.92445	3.72336	PODXL (4.4)	NKX2-5 (4.0)	RBPMS (3.7)	EPAS1 (3.6)	TBX3 (3.5)	EIF2C2 (3.4)	DLC1 (3.4)	SIPA1L2 (3.3)	MYH6 (3.3)	ITGB1 (3.3)
MP:0004567	decreased myocardial fiber number	2.67e-10	1.04e-05	<0.01	9.57349	4.98297	4.59052	MYOCD (5.7)	SPEG (5.1)	NKX2-5 (4.9)	TBX20 (4.5)	PLN (4.5)	SORBS1 (4.2)	SDPR (4.1)	RYR2 (4.0)	TBX5 (3.7)	RBPMS2 (3.7)
MP:0001633	poor circulation	2.7e-10	0.00023	<0.05	9.56864	3.63827	5.93036	TBX20 (5.9)	SCN5A (5.5)	TBX5 (5.1)	MYOCD (4.9)	NKX2-5 (4.9)	RYR2 (4.8)	GJA5 (4.5)	MYH6 (4.3)	PDE3A (4.2)	CHRM2 (3.4)
MP:0010392	prolonged QRS complex duration	4.78e-10	0.000168	<0.01	9.32057	3.77469	5.54588	SLC8A1 (7.7)	RYR2 (5.9)	MYH6 (5.7)	TBX20 (5.0)	PDE3A (4.5)	CCDC141 (4.2)	TBX5 (4.2)	ADRB1 (4.1)	CACNA1G (4.0)	NKX2-5 (4.0)
MP:0002754	dilated heart right ventricle	5.62e-10	0.000345	<0.05	9.25026	3.46218	5.78808	MYOCD (4.7)	XIRP1 (4.4)	PODXL (4.1)	PAM (4.1)	NFIA (4.0)	CRIM1 (3.9)	CRYAB (3.9)	EPAS1 (3.9)	CEFIP (3.8)	MYH7 (3.8)
MP:0005598	decreased ventricle muscle contractility	5.7e-10	0.000129	<0.01	9.24413	3.88941	5.35471	MYH6 (8.2)	PLN (7.6)	MYH7 (7.5)	SYNPO2L (7.4)	LDB3 (7.1)	XIRP1 (7.0)	ADPRHL1 (6.7)	SRL (6.6)	SCN5A (6.5)	RYR2 (6.1)
MP:0003896	prolonged PR interval	6.99e-10	0.00181	<0.20	9.15552	2.74232	6.4132	SLC8A1 (8.4)	RYR2 (6.7)	MYH6 (5.5)	NKX2-5 (5.0)	TBX5 (4.9)	FGF12 (4.7)	PDE3A (4.6)	CSDC2 (4.5)	ADRB1 (4.3)	SCN5A (4.3)
MP:0002128	abnormal blood circulation	7.13e-10	1.63e-05	<0.01	9.14691	4.78781	4.3591	GJA5 (5.9)	TBX5 (4.8)	HSPG2 (4.0)	NPR3 (3.8)	ID2 (3.4)	TBX3 (3.4)	CCDC141 (3.3)	SLC8A1 (3.3)	MYH6 (3.2)	DSP (3.2)
MP:0004084	abnormal cardiac muscle relaxation	7.25e-10	0.000295	<0.05	9.13966	3.53018	5.60948	PLN (7.8)	SLC8A1 (6.6)	MYH6 (6.3)	NKX2-5 (6.1)	MYH7 (6.1)	TBX20 (6.0)	RYR2 (6.0)	TBX5 (6.0)	ADPRHL1 (5.8)	SCN5A (5.6)
MP:0003566	abnormal cell adhesion	1.08e-09	6.77e-05	<0.01	8.96658	4.16941	4.79716	GP1BA (4.5)	SDPR (3.7)	ITGB1 (3.6)	EPAS1 (3.6)	DSP (3.5)	MACF1 (3.4)	TES (3.2)	SPEG (3.0)	MAP7D1 (2.9)	PHLDB2 (2.8)
MP:0001625	cardiac hypertrophy	1.16e-09	0.00223	<0.20	8.93554	2.6517	6.28385	PLN (8.1)	MYH6 (8.0)	XIRP1 (7.8)	ADPRHL1 (7.5)	LDB3 (7.5)	SRL (7.3)	MYH7 (7.3)	SYNPO2L (7.2)	CEFIP (7.2)	OBSCN (6.8)
MP:0000281	abnormal interventricular septum morphology	1.62e-09	0.000116	<0.01	8.79048	3.93554	4.85494	CAV1 (3.5)	KLHDC8B (3.4)	FLRT2 (3.3)	TBX20 (3.2)	ID2 (3.2)	PODXL (3.1)	TLE3 (3.1)	ZNF503 (3.1)	MSX2 (2.9)	FERMT2 (2.9)
MP:0005608	cardiac interstitial fibrosis	1.86e-09	0.000107	<0.01	8.73049	3.97062	4.75987	PLN (8.8)	MYH6 (8.3)	MYH7 (7.4)	NKX2-5 (7.3)	RYR2 (7.2)	ADPRHL1 (6.9)	XIRP1 (6.9)	SYNPO2L (6.8)	TBX20 (6.8)	LDB3 (6.5)
MP:0004215	abnormal myocardial fiber physiology	2.24e-09	0.00124	<0.20	8.64975	2.90658	5.74317	RYR2 (7.7)	MYH6 (7.6)	PLN (7.4)	SLC8A1 (7.2)	SCN5A (6.8)	ADPRHL1 (6.7)	NKX2-5 (6.7)	LDB3 (5.5)	SYNPO2L (5.4)	SORBS1 (5.3)
MP:0000284	double outlet heart right ventricle	2.29e-09	0.00154	<0.20	8.64016	2.81248	5.82769	FLRT2 (3.9)	FGF18 (3.5)	WNT11 (3.4)	C11orf9 (3.3)	ZFPM2 (3.2)	MYOCD (3.1)	TBX5 (3.1)	EDN2 (3.0)	NKX2-5 (2.9)	DLEC1 (2.9)
MP:0006126	abnormal outflow tract development	2.3e-09	0.000544	<0.05	8.63827	3.2644	5.37387	CDH2 (4.7)	ALPK3 (4.4)	KLHDC8B (4.1)	TBX20 (3.9)	ENSG00000237125 (3.8)	EPAS1 (3.8)	MYOCD (3.4)	FLRT2 (3.4)	PODXL (3.3)	WNT11 (3.2)
MP:0011090	partial perinatal lethality	5.91e-09	0.04	<0.20	8.22841	1.39794	6.83047	ZNF503 (4.1)	ZNF608 (3.7)	SSBP3 (3.3)	FGF8 (3.2)	PODXL (3.2)	DAG1 (3.0)	MET (2.7)	TBX3 (2.7)	EP300 (2.7)	MACF1 (2.6)
MP:0002192	hydrops fetalis	6.78e-09	0.00646	<0.20	8.16877	2.18977	5.979	TMEM204 (5.0)	TCF21 (4.6)	HLX (4.4)	PRRX1 (3.7)	EPAS1 (3.4)	CRIM1 (3.3)	CSDC2 (3.3)	WT1-AS (3.3)	NR2F1 (3.2)	ZNF503 (3.1)
MP:0003233	prolonged QT interval	7.24e-09	0.00175	<0.20	8.14026	2.75696	5.3833	SLC8A1 (7.3)	MYH6 (5.9)	RYR2 (5.8)	TBX5 (5.1)	ADRB1 (4.9)	NKX2-5 (4.8)	PLN (4.6)	ADPRHL1 (4.3)	SLC27A6 (4.2)	TBX20 (4.2)
MP:0001636	irregular heartbeat	8.31e-09	0.00172	<0.20	8.0804	2.76447	5.31593	TBX5 (7.5)	SLC8A1 (6.8)	MYH6 (5.9)	NKX2-5 (5.8)	ADCY5 (5.5)	RYR2 (5.4)	SCN5A (5.2)	PLN (5.2)	PDE3A (4.9)	ADPRHL1 (4.7)
MP:0001914	hemorrhage	8.81e-09	0.00557	<0.20	8.05502	2.25414	5.80088	SDPR (6.0)	GP1BA (3.9)	PODXL (3.7)	FERMT2 (3.7)	TMEM204 (3.5)	DAG1 (3.4)	DLC1 (3.3)	HSPG2 (3.3)	ITGB1 (3.3)	EPAS1 (3.2)
MP:0011099	complete lethality throughout fetal growth and development	9.27e-09	8.04e-05	<0.01	8.03292	4.09474	3.93818	EPAS1 (4.2)	TCF21 (4.2)	PODXL (4.1)	HLX (3.6)	MEIS1 (3.4)	ENSG00000237125 (3.4)	MACF1 (3.2)	TMEM204 (3.2)	EIF2C2 (3.1)	RBPMS (3.0)
MP:0002625	heart left ventricle hypertrophy	1.01e-08	0.00763	<0.20	7.99568	2.11748	5.8782	MYH6 (8.7)	ADPRHL1 (8.2)	PLN (8.0)	MYH7 (7.8)	SYNPO2L (7.2)	XIRP1 (7.0)	NKX2-5 (7.0)	LDB3 (7.0)	SRL (6.6)	CEFIP (6.3)
MP:0005438	abnormal glycogen homeostasis	1.15e-08	2.32e-05	<0.01	7.9393	4.63451	3.30479	SSPN (5.1)	TBX20 (4.7)	AKAP6 (4.1)	TMEM182 (4.1)	OBSCN (3.5)	PRKAB2 (3.5)	DTNA (3.4)	FBXO32 (3.4)	ENSG00000237298 (3.3)	DUSP13 (3.1)
MP:0000276	heart right ventricle hypertrophy	1.16e-08	0.00177	<0.20	7.93554	2.75203	5.18352	TBX5 (5.3)	NKX2-5 (5.2)	PLN (5.0)	RYR2 (4.4)	SLC8A1 (4.4)	MYH6 (4.3)	GJA5 (4.2)	SEMA3D (4.0)	DPT (3.9)	SSPN (3.8)
MP:0003105	abnormal heart atrium morphology	1.5e-08	0.00379	<0.20	7.82391	2.42136	5.40255	TBX20 (7.3)	SCN5A (6.9)	RYR2 (5.6)	GJA5 (4.8)	MYH6 (4.7)	TBX5 (4.7)	ENSG00000237125 (4.2)	SLC8A1 (4.2)	NKX2-5 (4.2)	NDRG4 (4.0)
MP:0000298	absent atrioventricular cushions	1.84e-08	0.000214	<0.05	7.73518	3.66959	4.0656	SLC8A1 (8.1)	MYH6 (7.5)	TBX20 (7.2)	TBX5 (6.4)	SCN5A (6.0)	NKX2-5 (6.0)	GJA5 (5.9)	RYR2 (5.7)	MYOCD (5.3)	PDE3A (5.1)
MP:0004057	thin myocardium compact layer	2.59e-08	0.00325	<0.20	7.5867	2.48812	5.09858	NKX2-5 (3.5)	SIPA1 (3.1)	ENTPD1 (3.0)	MYH7 (2.9)	HPS6 (2.7)	HLX (2.7)	ARID2 (2.7)	FUT11 (2.7)	KCNK7 (2.7)	GJA5 (2.5)
MP:0000297	abnormal atrioventricular cushion morphology	2.62e-08	0.00189	<0.20	7.5817	2.72354	4.85816	TBX5 (6.1)	CDH13 (5.1)	TBX20 (4.6)	SLC8A1 (4.4)	GJA5 (3.9)	MYH6 (3.6)	FLRT2 (3.4)	CDH2 (3.4)	DLC1 (3.4)	GJA1 (3.3)
MP:0001787	pericardial edema	2.87e-08	0.00321	<0.20	7.54212	2.49349	5.04862	TBX5 (5.0)	MYH6 (4.2)	NKX2-5 (4.0)	CDH2 (3.9)	TCF21 (3.6)	RYR2 (3.4)	ZFPM1 (3.3)	COL13A1 (3.3)	SIPA1L2 (3.3)	SIPA1L1 (3.2)
MP:0002747	abnormal aortic valve morphology	3.29e-08	0.000985	<0.05	7.4828	3.00656	4.47624	RYR2 (3.6)	PDLIM5 (3.1)	ZNF358 (3.0)	PHLDB2 (2.9)	LAMB2 (2.9)	SLC8A1 (2.8)	MYOCD (2.8)	FERMT2 (2.8)	CSDC2 (2.7)	OBSL1 (2.7)
MP:0005222	abnormal somite size	3.44e-08	0.000318	<0.05	7.46344	3.49757	3.96587	WNT11 (3.3)	CHRNE (3.3)	TBX5 (3.1)	ZNF219 (3.1)	ENSG00000237125 (2.9)	FGF8 (2.8)	ENSG00000237013 (2.8)	NMU (2.8)	SSPN (2.8)	RFX4 (2.8)
MP:0000270	abnormal heart tube morphology	3.54e-08	0.00593	<0.20	7.451	2.22695	5.22405	MYH6 (6.3)	SCN5A (5.9)	CDH2 (5.8)	RYR2 (5.7)	TBX20 (5.4)	NKX2-5 (5.2)	TBX5 (4.7)	FGF12 (4.5)	CSDC2 (4.4)	HCN4 (4.4)
MP:0004090	abnormal sarcomere morphology	3.57e-08	0.000427	<0.05	7.44733	3.36957	4.07776	DES (9.1)	ENO3 (8.7)	LDB3 (8.7)	TRDN (8.7)	SRL (8.5)	TTN (8.3)	MYOZ1 (8.1)	SYNPO2L (8.0)	CEFIP (8.0)	OBSCN (7.6)
MP:0005330	cardiomyopathy	4.07e-08	0.00242	<0.20	7.39041	2.61618	4.77422	ADPRHL1 (7.7)	PLN (7.7)	MYH7 (7.7)	MYH6 (7.3)	LDB3 (7.3)	XIRP1 (7.2)	SYNPO2L (7.2)	SCN5A (7.0)	CEFIP (6.8)	NKX2-5 (6.8)
MP:0002633	persistent truncus arteriosis	4.07e-08	0.0062	<0.20	7.39041	2.20761	5.1828	WNT11 (3.8)	MMP11 (3.8)	MET (3.5)	CBX8 (3.5)	ZNF503 (3.4)	ID2 (3.3)	EPAS1 (3.2)	ZFPM2 (3.0)	SEMA3A (2.9)	ZMIZ1 (2.9)
MP:0005333	decreased heart rate	4.19e-08	0.00189	<0.20	7.37779	2.72354	4.65425	PDE3A (5.6)	TBX5 (5.3)	SLC8A1 (5.3)	GJA5 (5.2)	NKX2-5 (4.7)	RYR2 (4.6)	ADCY5 (4.5)	PLN (4.4)	MYH6 (4.2)	KCNIP2 (3.8)
MP:0011109	partial lethality throughout fetal growth and development	4.47e-08	0.01	<0.20	7.34969	2	5.34969	FLRT2 (3.6)	MSX2 (3.5)	EP300 (3.5)	CTDSPL (3.4)	SKI (3.4)	PODXL (3.2)	FGFR2 (3.2)	ZMIZ1 (3.2)	DAG1 (3.2)	RBPMS2 (3.0)
MP:0005599	increased cardiac muscle contractility	4.64e-08	0.00167	<0.20	7.33348	2.77728	4.5562	MYH7 (8.0)	MYH6 (7.9)	LDB3 (7.0)	SYNPO2L (7.0)	XIRP1 (7.0)	ADPRHL1 (6.9)	PLN (6.7)	CEFIP (6.6)	TTN (6.2)	DES (6.0)
MP:0004485	increased response of heart to induced stress	4.77e-08	0.00041	<0.05	7.32148	3.38722	3.93427	MYH6 (8.0)	PLN (6.4)	XIRP1 (6.2)	MYH7 (6.2)	SYNPO2L (6.1)	TTN (5.9)	SRL (5.7)	ADPRHL1 (5.4)	OBSCN (5.3)	SCN5A (5.3)
MP:0001719	absent vitelline blood vessels	5.02e-08	9.56e-06	<0.01	7.2993	5.01954	2.27975	TBX5 (5.6)	EPAS1 (4.7)	GJA5 (4.6)	TMEM204 (4.5)	PODXL (4.3)	TCF21 (4.0)	TBX3 (3.9)	SIPA1L2 (3.7)	PDE3A (3.6)	NPR3 (3.6)
MP:0001698	decreased embryo size	6.12e-08	0.000244	<0.05	7.21325	3.61261	3.60064	EIF2C2 (3.4)	PODXL (3.3)	MAP3K3 (3.2)	EP300 (3.1)	DAG1 (3.1)	RBPMS2 (3.0)	SCAF11 (2.9)	ZNF609 (2.9)	ENSG00000237125 (2.8)	ITGB1 (2.8)
MP:0010454	abnormal truncus arteriosus septation	7.11e-08	0.01	<0.20	7.14813	2	5.14813	WNT11 (4.3)	TBX3 (4.3)	IRX3 (4.2)	ZNF503 (4.0)	ID2 (3.7)	TCF21 (3.7)	MSX2 (3.6)	FREM2 (3.5)	ACVR2B (3.4)	TBX5 (2.9)
MP:0011092	complete embryonic lethality	1.21e-07	0.000242	<0.05	6.91721	3.61618	3.30103	MSX2 (3.3)	HEATR5B (3.3)	EP300 (3.1)	CNOT1 (2.9)	MET (2.8)	SCAF11 (2.8)	PODXL (2.8)	DAG1 (2.6)	HLX (2.6)	DDX42 (2.6)
MP:0001718	abnormal visceral yolk sac morphology	1.51e-07	0.00059	<0.05	6.82102	3.22915	3.59188	TBX5 (5.0)	TBX20 (4.5)	SIPA1L2 (4.2)	MYH6 (4.0)	APOH (3.6)	NPR3 (3.5)	CDH2 (3.4)	ZFPM1 (3.3)	C11orf9 (3.3)	ENSG00000237125 (3.3)
MP:0001176	abnormal lung development	1.55e-07	2.25e-05	<0.01	6.80967	4.64782	2.16185	TCF21 (5.5)	OBSL1 (4.2)	ZFPM2 (3.6)	MACF1 (3.5)	TBX3 (3.5)	GJA5 (3.5)	WNT11 (3.4)	ZNF503 (3.4)	WT1-AS (3.4)	MEIS1 (3.4)
MP:0011108	partial embryonic lethality during organogenesis	1.65e-07	0.000773	<0.05	6.78252	3.11182	3.6707	PODXL (4.2)	MSX2 (4.0)	ENSG00000237125 (4.0)	EML4 (3.9)	TBX3 (3.7)	DLC1 (3.6)	DCBLD1 (3.3)	EFNA1 (3.2)	ITGB1 (3.2)	TTC21A (2.9)
MP:0002672	abnormal branchial arch artery morphology	1.88e-07	6.84e-06	<0.01	6.72584	5.16494	1.5609	PODXL (4.6)	FLRT2 (4.1)	EPAS1 (4.1)	TMEM204 (3.7)	CDH13 (3.1)	FOXP1 (3.0)	MARCKS (3.0)	HLX (2.9)	WNT11 (2.8)	EFNA1 (2.8)
MP:0006267	abnormal intercalated disc morphology	1.91e-07	0.00341	<0.20	6.71897	2.46725	4.25172	ADPRHL1 (6.5)	LDB3 (6.3)	CEFIP (6.0)	SYNPO2L (5.9)	PLN (5.6)	MYH7 (5.6)	SRL (5.6)	TTN (5.5)	XIRP1 (5.4)	TRDN (5.3)
MP:0002085	abnormal embryonic tissue morphology	2.22e-07	0.000102	<0.01	6.65365	3.9914	2.66225	TBX3 (4.6)	COL13A1 (4.0)	TCF21 (4.0)	EIF2C2 (3.5)	ACVR2B (3.2)	MSX2 (2.9)	PHLDB2 (2.8)	CDH2 (2.8)	MYOCD (2.7)	HEATR5B (2.7)
MP:0004486	decreased response of heart to induced stress	2.82e-07	0.000357	<0.05	6.54975	3.44733	3.10242	CAMK2D (4.8)	MYH7 (4.7)	SLC8A1 (3.9)	MYH6 (3.5)	XIRP1 (3.4)	CEFIP (3.3)	SYNPO2L (3.3)	FAM59A (3.2)	SCN5A (3.2)	PDLIM5 (3.2)
MP:0003920	abnormal heart right ventricle morphology	3.73e-07	0.00491	<0.20	6.42829	2.30892	4.11937	MYOCD (5.1)	TCF21 (4.5)	PLN (4.4)	DPT (4.2)	TBX20 (3.7)	C11orf9 (3.6)	ZFPM2 (3.6)	CSDC2 (3.4)	SPEG (3.4)	PODXL (3.1)
MP:0010418	perimembraneous ventricular septal defect	3.82e-07	0.00224	<0.20	6.41794	2.64975	3.76818	WNT11 (4.1)	MSX2 (3.9)	ADAMTSL3 (3.8)	PDZRN3 (3.8)	NKD2 (3.8)	SEMA3A (3.6)	CRLF1 (3.5)	SSPN (3.5)	ITGA9 (3.5)	ZNF503 (3.4)
MP:0011101	partial prenatal lethality	3.85e-07	0.000868	<0.05	6.41454	3.06148	3.35306	HSPG2 (3.6)	FREM2 (3.1)	DAG1 (3.0)	EIF2C2 (2.8)	FGFR1 (2.8)	SLC12A7 (2.7)	MACF1 (2.6)	MSX2 (2.6)	LAMB2 (2.5)	FGFR2 (2.5)
MP:0000292	distended pericardium	4.18e-07	0.01	<0.20	6.37882	2	4.37882	DAG1 (3.4)	MAP3K11 (3.0)	PODXL (3.0)	FGF8 (3.0)	RFX4 (2.9)	GON4L (2.7)	CAV1 (2.7)	ASH1L (2.6)	MAP3K3 (2.6)	FGF18 (2.6)
MP:0003229	abnormal vitelline vasculature morphology	5.29e-07	0.000242	<0.05	6.27654	3.61618	2.66036	EPAS1 (5.1)	PODXL (4.6)	TMEM204 (4.5)	DLC1 (3.7)	HSPG2 (3.7)	GJA1 (3.5)	DCBLD1 (3.3)	EFNA1 (3.2)	NPR3 (3.2)	MAP3K11 (3.1)
MP:0003567	abnormal fetal cardiomyocyte proliferation	6.12e-07	0.03	<0.20	6.21325	1.52288	4.69037	FUT11 (4.0)	WT1-AS (3.5)	OBSL1 (3.2)	FNDC3A (3.0)	NR2F1 (3.0)	SLC8A1 (3.0)	MLNR (2.8)	ZFPM2 (2.7)	PLN (2.7)	NKX2-5 (2.6)
MP:0008725	enlarged heart atrium	7.85e-07	0.03	<0.20	6.10513	1.52288	4.58225	MYH6 (5.8)	NKX2-5 (5.7)	TBX5 (5.3)	FGF12 (4.6)	RYR2 (4.2)	FGF18 (4.1)	MYH7 (3.7)	SIPA1L2 (3.7)	CDH2 (3.7)	TBX20 (3.4)
MP:0002086	abnormal extraembryonic tissue morphology	8.22e-07	0.00017	<0.01	6.08513	3.76955	2.31558	DAG1 (3.9)	FERMT2 (3.9)	SESTD1 (3.7)	EIF2C2 (3.6)	PHLDB2 (3.5)	FNDC3B (3.3)	SYNE2 (3.0)	RBPMS2 (2.9)	GOLGA4 (2.9)	RBPMS (2.8)
MP:0001711	abnormal placenta morphology	8.38e-07	0.00921	<0.20	6.07676	2.03574	4.04102	FNDC3B (3.8)	DAG1 (3.4)	ARIH2 (3.3)	EFNA1 (3.2)	RAP2B (3.1)	TBX5 (3.1)	EPAS1 (2.8)	WNT11 (2.8)	SLC27A6 (2.7)	OAZ2 (2.6)
MP:0003137	abnormal impulse conducting system conduction	8.58e-07	0.00962	<0.20	6.06651	2.01682	4.04969	SLC8A1 (7.6)	RYR2 (7.2)	MYH6 (6.4)	FGF12 (5.5)	TBX5 (5.2)	NKX2-5 (5.0)	ADCY5 (4.8)	ADRB1 (4.7)	TBX20 (4.2)	SCN5A (4.0)
MP:0011086	partial postnatal lethality	9.3e-07	0.0059	<0.20	6.03152	2.22915	3.80237	ZNF503 (3.8)	ZMIZ1 (3.6)	FGFR1 (3.5)	FLRT2 (3.5)	NFIA (3.4)	EPAS1 (3.3)	MEIS1 (3.2)	SEMA3A (3.2)	PDE3A (3.1)	NR2F1 (3.1)
MP:0004007	abnormal lung vasculature morphology	9.89e-07	6.27e-05	<0.01	6.0048	4.20273	1.80207	TBX5 (7.1)	GJA5 (5.6)	MUC1 (3.9)	FREM2 (3.4)	PDZRN3 (3.4)	ZNF503 (3.4)	ZFPM2 (3.3)	NR2F1 (3.1)	COL13A1 (3.1)	TMEM204 (3.1)
MP:0001575	cyanosis	1.04e-06	0.000308	<0.05	5.98297	3.51145	2.47152	ZNF503 (5.2)	IRX3 (4.8)	FLRT2 (4.8)	MEIS1 (4.1)	PITX3 (3.5)	FGFR1 (3.1)	WNT11 (3.1)	RFX4 (3.0)	INA (3.0)	SEMA3A (2.8)
MP:0004566	myocardial fiber degeneration	1.07e-06	0.000119	<0.01	5.97062	3.92445	2.04616	PRKAB2 (4.3)	PLN (4.2)	SORBS1 (4.2)	DES (4.0)	XIRP1 (4.0)	SYNPO2L (3.8)	LDB3 (3.8)	MYH6 (3.7)	SRL (3.6)	CORO6 (3.6)
MP:0004076	abnormal vitelline vascular remodeling	1.15e-06	7.72e-05	<0.01	5.9393	4.11238	1.82692	PODXL (4.4)	TBX5 (4.2)	MAP3K3 (4.0)	MYH6 (3.7)	EPAS1 (3.5)	TMEM204 (3.4)	ITGA9 (3.2)	SIPA1L2 (3.2)	TBX20 (3.1)	NPR3 (3.0)
MP:0005592	abnormal vascular smooth muscle morphology	1.52e-06	0.00211	<0.20	5.81816	2.67572	3.14244	HSPG2 (4.6)	GJA5 (4.2)	MYOCD (4.1)	TMEM204 (4.0)	EPAS1 (3.8)	SPEG (3.7)	SLC8A1 (3.6)	PLN (3.4)	PODXL (3.4)	THBS3 (3.3)
MP:0000285	abnormal heart valve morphology	1.93e-06	3.57e-05	<0.01	5.71444	4.44733	1.26711	ADAMTSL3 (3.7)	ID2 (3.5)	SEMA3D (3.5)	CRIM1 (3.4)	LPHN3 (3.1)	SLC8A1 (3.0)	NPR3 (3.0)	TRPM3 (2.9)	FGF18 (2.9)	WNT11 (2.8)
MP:0010404	ostium primum atrial septal defect	1.96e-06	0.00376	<0.20	5.70774	2.42481	3.28293	ADAMTSL3 (5.6)	CAV1 (4.2)	FLRT2 (4.1)	TCF21 (4.1)	CRIM1 (3.4)	SDPR (3.3)	SSPN (3.3)	SEMA3D (3.3)	FGF18 (3.3)	DES (3.2)
MP:0003717	pallor	2.04e-06	0.01	<0.20	5.69037	2	3.69037	ZFPM1 (4.8)	PKLR (4.1)	XPO7 (3.7)	EIF2C2 (3.4)	LDB1 (3.1)	ZMIZ1 (2.9)	BTRC (2.8)	SDPR (2.7)	EPAS1 (2.7)	CRIM1 (2.6)
MP:0001730	embryonic growth arrest	2.32e-06	0.00249	<0.20	5.63451	2.6038	3.03071	MCM9 (3.5)	HEATR5B (2.9)	ARID2 (2.9)	ACVR2B (2.8)	TBX5 (2.8)	MAP7D1 (2.8)	SYNE2 (2.7)	ENSG00000237125 (2.7)	DSP (2.7)	ZMIZ1 (2.6)
MP:0001688	abnormal somite development	3.68e-06	0.00148	<0.20	5.43415	2.82974	2.60441	FGF8 (5.0)	MSX2 (3.6)	ACVR2B (3.1)	TBX5 (3.1)	ZNF608 (3.0)	BMPR1A (2.9)	RCBTB1 (2.9)	TLE3 (2.9)	SH3PXD2A (2.7)	C5orf41 (2.6)
MP:0001614	abnormal blood vessel morphology	3.69e-06	0.03	<0.20	5.43297	1.52288	3.91009	TMEM204 (4.8)	PODXL (4.5)	HSPG2 (4.2)	EPAS1 (3.7)	PRRX1 (3.6)	CAV1 (3.5)	HLX (3.4)	COL13A1 (3.0)	GJA1 (3.0)	PDE3A (2.9)
MP:0000477	abnormal intestine morphology	4.37e-06	0.03	<0.20	5.35952	1.52288	3.83664	C11orf9 (4.2)	TCF21 (3.9)	ZCCHC24 (3.8)	ZFPM2 (3.3)	ZNF503 (3.1)	HSPG2 (3.0)	CTDSPL (2.8)	ARHGEF40 (2.8)	FERMT2 (2.7)	RBPMS (2.7)
MP:0003222	increased cardiomyocyte apoptosis	5.2e-06	0.00419	<0.20	5.284	2.37779	2.90621	MYH6 (5.2)	ADPRHL1 (4.5)	MYH7 (4.5)	NKX2-5 (3.7)	SCN5A (3.7)	CORO6 (3.7)	SYNPO2L (3.7)	XIRP1 (3.6)	TXNRD1 (3.5)	RYR2 (3.4)
MP:0003231	abnormal placenta vasculature	6.15e-06	0.01	<0.20	5.21112	2	3.21112	EFNA1 (4.2)	GJA5 (3.7)	TBX5 (3.2)	FNDC3B (3.2)	PODXL (3.2)	DAG1 (3.0)	LRRFIP2 (2.7)	ZMIZ1 (2.6)	ENSG00000249816 (2.6)	MMP11 (2.6)
MP:0010465	aberrant origin of the right subclavian artery	6.17e-06	0.00344	<0.20	5.20971	2.46344	2.74627	MMP11 (4.4)	NR2F1 (3.6)	WNT11 (3.6)	EMILIN3 (3.5)	ZNF608 (3.4)	GJA5 (3.3)	EPAS1 (3.2)	SCN5A (3.2)	FBXO32 (3.2)	ENSG00000250682 (3.0)
MP:0006113	abnormal heart septum morphology	6.57e-06	0.03	<0.20	5.18243	1.52288	3.65956	RYR2 (5.6)	SCN5A (5.4)	MYH6 (5.0)	XIRP1 (5.0)	MYH7 (4.9)	ENSG00000237125 (4.8)	ADPRHL1 (4.7)	TBX20 (4.7)	SYNPO2L (4.5)	CDH2 (4.0)
MP:0003091	abnormal cell migration	6.67e-06	0.02	<0.20	5.17587	1.69897	3.4769	ITGAV (4.5)	FERMT2 (3.8)	PHLDB2 (3.6)	PLEC (3.5)	DAG1 (3.5)	EPAS1 (3.3)	CRIM1 (3.1)	TES (3.1)	SBNO2 (3.0)	HSPG2 (3.0)
MP:0003658	abnormal capillary morphology	7.57e-06	0.03	<0.20	5.1209	1.52288	3.59803	PODXL (3.7)	SLC12A7 (3.3)	NMB (3.0)	FUT11 (3.0)	DLC1 (2.8)	HSPG2 (2.8)	DNAH11 (2.8)	EPAS1 (2.7)	NKD2 (2.6)	DCBLD1 (2.6)
MP:0002151	abnormal neural tube morphology/development	1.06e-05	0.00535	<0.20	4.97469	2.27165	2.70305	FGF8 (4.0)	MSX2 (3.9)	TBX3 (3.6)	FLRT2 (3.5)	PIH1D2 (3.1)	SSBP3 (3.1)	IFT140 (3.1)	WNT11 (3.0)	HEATR5B (3.0)	ACVR2B (2.9)
MP:0011348	abnormal renal glomerulus basement membrane morphology	1.1e-05	0.19	<0.20	4.95861	0.721246	4.23736	LAMB2 (3.8)	SPEG (3.6)	CDKN1A (3.5)	NME3 (3.4)	DAG1 (3.0)	PDE3A (3.0)	CHPF (3.0)	P4HTM (3.0)	C6orf204 (2.9)	FAM184A (2.8)
MP:0011091	complete prenatal lethality	1.12e-05	0.00409	<0.20	4.95078	2.38828	2.56251	MSX2 (3.3)	TBX3 (3.0)	ZMIZ1 (2.9)	EPAS1 (2.9)	RBPMS (2.8)	FGF8 (2.8)	CNOT1 (2.8)	CDH2 (2.7)	HEATR5B (2.7)	FGFR2 (2.5)
MP:0000929	open neural tube	1.25e-05	0.02	<0.20	4.90309	1.69897	3.20412	MSX2 (4.6)	EP300 (3.9)	FGF8 (3.6)	TMEM165 (3.2)	PIH1D2 (3.2)	BMPR1A (2.7)	FREM2 (2.7)	FGFR1 (2.6)	PRRX1 (2.6)	TLE3 (2.6)
MP:0001178	pulmonary hypoplasia	1.34e-05	0.000794	<0.05	4.8729	3.10018	1.77272	TBX5 (4.7)	MMP11 (4.4)	FGF18 (4.4)	CRLF1 (3.7)	ZFPM2 (3.7)	PDZRN3 (3.6)	CSDC2 (3.6)	WNT11 (3.6)	COL13A1 (3.3)	SEMA3A (3.3)
MP:0005221	abnormal rostral-caudal axis patterning	1.8e-05	0.00571	<0.20	4.74473	2.24336	2.50136	FGF8 (5.9)	CDH2 (4.1)	MSX2 (3.5)	COL13A1 (3.3)	PHLDB2 (3.2)	ACVR2B (3.1)	FLRT2 (3.1)	ZFPM1 (3.0)	TRPM3 (3.0)	MAP3K3 (3.0)
MP:0003659	abnormal lymph circulation	1.81e-05	0.00404	<0.20	4.74232	2.39362	2.3487	FLRT2 (4.7)	PODXL (4.2)	CDH13 (4.1)	EPAS1 (3.6)	ZFPM2 (3.6)	TMEM204 (3.2)	CCBE1 (3.2)	GJA1 (3.1)	SEMA3D (3.0)	TCF21 (2.8)
MP:0000596	abnormal liver development	2.07e-05	0.00493	<0.20	4.68403	2.30715	2.37688	MEIS1 (5.1)	WT1-AS (4.8)	ZFPM2 (4.4)	CLOCK (3.2)	CCNL1 (3.1)	C11orf9 (3.1)	ENSG00000237125 (3.1)	TCF21 (3.1)	ENSG00000259359 (3.0)	FRMD4B (3.0)
MP:0001954	respiratory distress	2.11e-05	0.00301	<0.20	4.67572	2.52143	2.15428	PDZRN3 (4.5)	ZNF503 (4.3)	FGFR1 (3.9)	NPR3 (3.7)	FGFR2 (3.6)	CRLF1 (3.6)	RFX4 (3.5)	FGF18 (3.5)	WNT11 (3.5)	HLX (3.5)
MP:0002135	abnormal kidney morphology	2.16e-05	0.0089	<0.20	4.66555	2.05061	2.61494	TCF21 (6.5)	ZNF503 (3.9)	ADAMTSL3 (3.7)	MUC1 (3.3)	PHLDB2 (3.2)	TBX3 (3.2)	FREM2 (3.2)	COL13A1 (3.1)	TMEM26 (3.1)	SEMA3A (3.0)
MP:0002191	abnormal artery morphology	2.86e-05	0.00285	<0.20	4.54363	2.54516	1.99848	TMEM204 (5.2)	COL13A1 (4.8)	EPAS1 (4.5)	EFNA1 (4.2)	CRLF1 (3.8)	HSPG2 (3.7)	GJA5 (3.7)	NPR3 (3.4)	ADAMTSL3 (3.3)	WNT11 (3.2)
MP:0003675	kidney cysts	3.33e-05	0.06	<0.20	4.47756	1.22185	3.25571	TCF21 (4.4)	TCTN3 (4.4)	FGFR1 (4.2)	BMPR1A (4.0)	IFT140 (3.8)	SEMA3D (3.7)	WT1-AS (3.6)	DPCD (3.2)	FLRT2 (3.2)	NR2F1 (3.1)
MP:0001672	abnormal embryogenesis/ development	3.41e-05	0.00277	<0.20	4.46725	2.55752	1.90973	PODXL (3.3)	XPO4 (3.1)	ZNF608 (3.0)	FGF8 (2.9)	EP300 (2.9)	TAF5 (2.9)	ENSG00000237125 (2.9)	RCBTB1 (2.8)	MSX2 (2.7)	ENSG00000230525 (2.6)
MP:0010551	abnormal coronary vessel morphology	3.81e-05	0.02	<0.20	4.41908	1.69897	2.72011	PODXL (4.8)	C11orf9 (3.5)	COL13A1 (3.5)	TCF21 (3.4)	GJA5 (3.4)	WNT11 (3.1)	ID2 (3.0)	C5orf13 (3.0)	TBX3 (2.9)	FGF18 (2.7)
MP:0002177	abnormal outer ear morphology	3.85e-05	0.00432	<0.20	4.41454	2.36452	2.05002	SEMA3A (4.2)	FGFR2 (4.1)	MET (3.9)	ZNF503 (3.6)	COL13A1 (3.6)	MSX2 (3.6)	FIGN (3.5)	IRX3 (3.3)	SEMA3D (3.0)	FGF18 (2.7)
MP:0002080	prenatal lethality	4.19e-05	0.0022	<0.20	4.37779	2.65758	1.72021	TLE3 (3.0)	MSX2 (3.0)	CCBE1 (2.9)	NKD2 (2.9)	RASEF (2.8)	TBX3 (2.8)	WT1-AS (2.8)	ZMIZ1 (2.7)	MVK (2.7)	LDB1 (2.5)
MP:0004255	abnormal spongiotrophoblast layer morphology	4.24e-05	0.05	<0.20	4.37263	1.30103	3.0716	OBSL1 (4.3)	FNDC3B (3.9)	GH2 (3.8)	CSH2 (3.3)	ZNF609 (3.1)	EIF2C2 (3.0)	TFEB (2.9)	ARIH2 (2.8)	WNT11 (2.6)	MSX2 (2.5)
MP:0002116	abnormal craniofacial bone morphology	4.61e-05	0.000564	<0.05	4.3363	3.24872	1.08758	IRX3 (4.6)	ZNF503 (3.7)	FGFR2 (3.7)	PRRX1 (3.5)	MPPED2 (3.4)	PLCD1 (3.4)	SEMA3A (3.3)	MSX2 (3.2)	CRLF1 (3.2)	NKX2-5 (3.2)
MP:0000260	abnormal angiogenesis	4.73e-05	0.16	<0.20	4.32514	0.79588	3.52926	PODXL (5.4)	TMEM204 (5.0)	HSPG2 (5.0)	GJA1 (3.9)	HLX (3.2)	FERMT2 (3.1)	COL13A1 (3.1)	C1orf145 (2.9)	LAMB2 (2.9)	EPAS1 (2.9)
MP:0002231	abnormal primitive streak morphology	5.12e-05	0.00842	<0.20	4.29073	2.07469	2.21604	FGF8 (5.0)	COL13A1 (3.8)	TBX3 (3.6)	ZNF608 (3.6)	FGF5 (3.5)	MSX2 (3.3)	RBPMS2 (3.2)	SIPA1L2 (3.1)	PDZRN3 (3.0)	CDH2 (3.0)
MP:0005650	abnormal limb bud morphology	5.61e-05	0.00852	<0.20	4.25104	2.06956	2.18148	FGF8 (4.9)	MSX2 (4.6)	ENSG00000237125 (4.2)	WNT11 (3.3)	TBX5 (3.3)	DLC1 (3.3)	MEIS1 (3.2)	PRRX1 (3.0)	FGFR2 (3.0)	TBX20 (3.0)
MP:0001622	abnormal vasculogenesis	5.65e-05	0.02	<0.20	4.24795	1.69897	2.54898	TBX5 (3.6)	PODXL (3.5)	CRAMP1L (3.4)	TMEM204 (3.4)	ZMIZ1 (3.2)	CAV1 (3.2)	ID2 (3.0)	EPAS1 (2.8)	TBX3 (2.8)	TRAK1 (2.8)
MP:0009404	centrally nucleated skeletal muscle fibers	5.67e-05	0.000384	<0.05	4.24642	3.41567	0.830748	DUSP13 (6.9)	CEFIP (6.0)	XIRP1 (5.9)	LDB3 (5.8)	SYNPO2L (5.6)	SRL (5.5)	TRDN (5.5)	CORO6 (5.4)	ENO3 (5.3)	SYPL2 (5.1)
MP:0004787	abnormal dorsal aorta morphology	6e-05	0.00348	<0.20	4.22185	2.45842	1.76343	TMEM204 (4.9)	EPAS1 (4.8)	PODXL (4.8)	HLX (4.3)	HSPG2 (4.1)	TBX3 (3.5)	EFNA1 (3.4)	MAP3K3 (3.2)	ITGB1 (3.0)	GJA5 (3.0)
MP:0003227	abnormal vascular branching morphogenesis	6.18e-05	0.1	<0.20	4.20901	1	3.20901	TMEM204 (5.0)	PODXL (4.7)	EPAS1 (4.1)	WT1-AS (3.3)	C6orf204 (3.1)	GP1BA (3.0)	TCF21 (2.8)	ENSG00000182873 (2.7)	SDPR (2.6)	HSPG2 (2.5)
MP:0003641	small lung	7.3e-05	0.00074	<0.05	4.13668	3.13077	1.00591	COL13A1 (5.1)	FGFR1 (4.5)	LAMB2 (4.0)	FREM2 (4.0)	TMEM26 (3.7)	WNT11 (3.6)	ADCY5 (3.4)	SEMA3A (3.4)	GJA1 (3.2)	LRIG1 (3.1)
MP:0000752	dystrophic muscle	7.46e-05	0.00653	<0.20	4.12726	2.18509	1.94217	XIRP1 (5.7)	LDB3 (5.1)	SYNPO2L (5.1)	CEFIP (5.0)	PPAPDC3 (4.7)	DUSP13 (4.7)	SRL (4.7)	CORO6 (4.6)	AKAP6 (4.6)	DES (4.5)
MP:0000759	abnormal skeletal muscle morphology	7.68e-05	0.00904	<0.20	4.11464	2.04383	2.07081	SYPL2 (7.1)	DUSP13 (6.8)	MYOZ1 (6.4)	ENO3 (6.4)	TRDN (6.4)	SRL (6.0)	SYNPO2L (5.9)	LDB3 (5.7)	TTN (5.7)	CEFIP (5.6)
MP:0000474	abnormal foregut morphology	7.95e-05	0.02	<0.20	4.09963	1.69897	2.40066	FGF8 (5.5)	ZFPM2 (3.5)	SLC12A7 (3.4)	FERMT2 (3.4)	ITGA9 (3.3)	FGFR2 (3.2)	HCN4 (3.2)	BMPR1A (3.2)	C11orf9 (3.2)	COL13A1 (3.1)
MP:0002279	abnormal diaphragm morphology	9.01e-05	0.00941	<0.20	4.04528	2.02641	2.01886	DUSP13 (5.5)	WT1-AS (5.0)	SRL (4.9)	ZCCHC24 (4.7)	FGF5 (4.6)	TRDN (4.5)	PITX3 (4.4)	TTN (4.3)	MYOZ1 (4.1)	SYNPO2L (4.1)
MP:0004187	cardia bifida	9.62e-05	0.08	<0.20	4.01682	1.09691	2.91991	ZFPM1 (3.7)	TESC (2.6)	CDH2 (2.5)	ENSG00000223960 (2.5)	CHPF (2.5)	ZNF358 (2.4)	DCBLD1 (2.4)	C11orf9 (2.4)	FGF8 (2.4)	DSP (2.4)
MP:0002884	abnormal branchial arch morphology	0.000104	0.03	<0.20	3.98297	1.52288	2.46009	MMP11 (3.1)	FGF18 (3.1)	EPAS1 (3.1)	TMTC2 (2.8)	EFNA1 (2.8)	ENSG00000237125 (2.8)	WNT11 (2.7)	MSX2 (2.7)	FREM2 (2.6)	HSPG2 (2.5)
MP:0004110	transposition of great arteries	0.000109	0.000202	<0.01	3.96257	3.69465	0.267925	SH3PXD2A (4.0)	TTC21A (3.6)	FGF8 (3.1)	AMT (3.1)	CACNA1G (2.8)	SKI (2.8)	GJA5 (2.7)	CALHM2 (2.7)	PRKAB2 (2.6)	MSX2 (2.6)
MP:0000272	abnormal aorta morphology	0.000129	0.00396	<0.20	3.88941	2.4023	1.48711	TMEM204 (5.0)	FKBP7 (4.5)	CRIM1 (4.2)	COL13A1 (4.2)	TBX20 (3.9)	FERMT2 (3.8)	DLC1 (3.7)	MYOCD (3.5)	MSX2 (3.4)	GJA1 (3.4)
MP:0003974	abnormal endocardium morphology	0.000132	0.00832	<0.20	3.87943	2.07988	1.79955	PODXL (5.6)	EPAS1 (4.8)	NPR3 (4.7)	HSPG2 (4.2)	GJA5 (3.9)	TMEM204 (3.7)	COL13A1 (3.4)	MAP3K11 (3.0)	SDPR (3.0)	SLC8A1 (3.0)
MP:0005439	decreased glycogen level	0.000136	0.0045	<0.20	3.86646	2.34679	1.51967	SORBS1 (4.9)	ADCK3 (4.1)	ENO3 (3.7)	TRDN (3.7)	TTN (3.7)	LDB3 (3.6)	OBSCN (3.6)	TMEM182 (3.6)	XIRP1 (3.5)	PRKAB2 (3.3)
MP:0006027	impaired lung alveolus development	0.000139	0.01	<0.20	3.85699	2	1.85699	MEIS1 (4.4)	GJA5 (3.7)	TCF21 (3.7)	DCBLD1 (3.7)	CRLF1 (3.5)	IRX3 (3.5)	DLC1 (3.5)	FERMT2 (3.2)	ZNF503 (3.1)	CRIM1 (3.1)
MP:0001299	abnormal eye distance/ position	0.000145	0.01	<0.20	3.83863	2	1.83863	TRPM3 (3.4)	AKAP6 (2.9)	PRKAB2 (2.8)	DMRTA2 (2.8)	ALPK3 (2.8)	FREM2 (2.7)	FBXO32 (2.7)	COL17A1 (2.6)	FGF8 (2.6)	SESTD1 (2.6)
MP:0001306	small lens	0.000155	0.07	<0.20	3.80967	1.1549	2.65477	PITX3 (6.5)	OPN4 (4.4)	ZNF503 (3.2)	NR2F1 (3.2)	CRIM1 (3.1)	NAV2 (2.4)	SLC22A14 (2.3)	SEMA3A (2.3)	CDH2 (2.3)	MEIS1 (2.1)
MP:0000554	abnormal carpal bone morphology	0.000166	0.08	<0.20	3.77989	1.09691	2.68298	TBX5 (3.7)	CHRM2 (3.4)	IL17D (3.3)	N6AMT2 (3.1)	PRRX1 (3.0)	ADAMTSL3 (3.0)	MSX2 (3.0)	SRGAP1 (3.0)	RAB3B (2.8)	SLC12A7 (2.7)
MP:0005244	hemopericardium	0.000176	0.03	<0.20	3.75449	1.52288	2.23161	WT1-AS (6.4)	ZFPM2 (5.3)	PODXL (4.3)	CRIM1 (4.1)	TMEM204 (4.1)	C11orf9 (4.1)	FERMT2 (3.8)	ENSG00000237125 (3.7)	MEIS1 (3.4)	MACF1 (3.1)
MP:0003604	single kidney	0.000179	0.00801	<0.20	3.74715	2.09637	1.65078	C5orf13 (5.0)	FREM2 (4.9)	NR2F1 (4.1)	FAM189B (3.9)	PHLDB2 (3.8)	COL13A1 (3.7)	NKD2 (3.4)	MMP11 (3.2)	TCF21 (3.1)	BMPR1A (3.1)
MP:0011100	complete preweaning lethality	0.000202	0.01	<0.20	3.69465	2	1.69465	EIF2C2 (3.4)	SIPA1L2 (3.3)	ITGAV (3.2)	EPAS1 (3.2)	BMPR1A (3.0)	LPHN3 (2.8)	TBX5 (2.8)	SPTBN1 (2.6)	STRN (2.5)	DAG1 (2.5)
MP:0001081	abnormal cranial ganglia morphology	0.000207	0.00237	<0.20	3.68403	2.62525	1.05878	FGF18 (3.9)	ELAVL4 (3.8)	DLC1 (3.3)	ENSG00000230525 (3.2)	INA (3.0)	FIGN (2.9)	NR2F1 (2.8)	CBX8 (2.8)	IRX3 (2.7)	TBX3 (2.6)
MP:0005202	lethargy	0.000229	0.01	<0.20	3.64016	2	1.64016	SLC22A13 (4.2)	PRKAR2A (3.4)	PKLR (3.1)	PLN (2.9)	PDGFRL (2.9)	PAM (2.8)	MUC1 (2.8)	DPT (2.7)	PPARGC1A (2.7)	MMP11 (2.7)
MP:0011290	decreased nephron number	0.000235	0.00373	<0.20	3.62893	2.42829	1.20064	MEIS1 (5.1)	NPR3 (4.8)	VEPH1 (4.2)	CCBE1 (4.1)	ID2 (3.5)	SEMA3A (3.4)	NR2F1 (3.1)	MYOCD (3.1)	BMPR1A (3.0)	ARHGAP24 (3.0)
MP:0011088	partial neonatal lethality	0.000247	0.0034	<0.20	3.6073	2.46852	1.13878	ZNF503 (4.0)	FLRT2 (4.0)	TCF21 (3.7)	FGFR2 (3.6)	ZFPM2 (3.5)	PDZRN3 (3.5)	MEIS1 (3.4)	NPR3 (3.3)	OBSL1 (3.2)	WNT11 (3.1)
MP:0001629	abnormal heart rate	0.000256	0.00693	<0.20	3.59176	2.15927	1.43249	TBX5 (8.1)	SLC8A1 (6.1)	TBX20 (5.5)	RYR2 (5.2)	MYH6 (5.2)	FGF12 (5.0)	NKX2-5 (4.4)	SCN5A (4.1)	CACNA1D (4.0)	ADAMTSL3 (3.7)
MP:0003084	abnormal skeletal muscle fiber morphology	0.000267	0.00135	<0.20	3.57349	2.86967	0.703823	DUSP13 (8.0)	MYOZ1 (7.4)	TRDN (7.0)	SRL (6.9)	TTN (6.8)	LDB3 (6.8)	ENO3 (6.4)	CEFIP (6.4)	SYPL2 (6.3)	XIRP1 (6.3)
MP:0003446	renal hypoplasia	0.000301	0.01	<0.20	3.52143	2	1.52143	FGFR1 (4.4)	FAM189B (4.2)	NKD2 (3.8)	NR2F1 (3.8)	MEIS1 (3.3)	TBX3 (3.2)	SEMA3D (3.1)	RBPMS (2.9)	RBPMS2 (2.9)	EML4 (2.9)
MP:0004936	impaired branching involved in ureteric bud morphogenesis	0.000317	0.02	<0.20	3.49894	1.69897	1.79997	FREM2 (5.5)	ADAMTSL3 (4.8)	FGFR1 (4.0)	ARHGEF40 (4.0)	PDZRN3 (3.8)	NR2F1 (3.6)	SEMA3D (3.6)	TCF21 (3.4)	BMPR1A (3.3)	FGFR2 (3.2)
MP:0008770	decreased survivor rate	0.000335	0.04	<0.20	3.47496	1.39794	2.07702	FLRT2 (3.5)	WNT11 (3.4)	MTUS1 (3.0)	C5orf13 (2.9)	PI16 (2.7)	NFIA (2.7)	PKLR (2.7)	HLX (2.6)	SSBP3 (2.6)	HSPG2 (2.5)
MP:0009399	increased skeletal muscle fiber size	0.000341	0.02	<0.20	3.46725	1.69897	1.76828	DUSP13 (6.1)	SYPL2 (5.2)	SRL (5.1)	XIRP1 (5.0)	SYNPO2L (4.8)	TRDN (4.7)	LDB3 (4.6)	C20orf166 (4.5)	TMEM182 (4.5)	CAV1 (4.4)
MP:0001634	internal hemorrhage	0.000341	0.37	<0.20	3.46725	0.431798	3.03545	GP1BA (5.4)	SDPR (4.1)	FBXO11 (3.5)	CMTM5 (3.4)	PPIP5K2 (2.9)	RBPMS2 (2.9)	TMEM204 (2.8)	KIAA1755 (2.8)	MAP3K11 (2.7)	ZNF358 (2.6)
MP:0000751	myopathy	0.00036	0.05	<0.20	3.4437	1.30103	2.14267	CEFIP (7.1)	XIRP1 (6.3)	TRDN (6.1)	SRL (6.1)	DUSP13 (6.1)	TTN (6.0)	SYPL2 (5.8)	LDB3 (5.7)	CORO6 (5.7)	HSPG2 (5.6)
MP:0002626	increased heart rate	0.000366	0.24	<0.20	3.43652	0.619789	2.81673	GJA5 (4.1)	GH2 (3.9)	SLC8A1 (3.4)	ADCY5 (3.4)	ESR2 (3.4)	KCNIP2 (3.4)	TBX5 (3.3)	HCN4 (3.0)	OPN4 (3.0)	MTUS1 (2.8)
MP:0004200	decreased fetal size	0.00037	0.02	<0.20	3.4318	1.69897	1.73283	MARK3 (3.6)	FAT1 (3.5)	PODXL (3.3)	FGFR2 (3.3)	WNT11 (3.3)	NPR3 (3.2)	FNDC3B (3.2)	FGFR1 (3.1)	FGF18 (3.1)	MSX2 (2.9)
MP:0004808	abnormal hematopoietic stem cell morphology	0.000382	0.19	<0.20	3.41794	0.721246	2.69669	ASH1L (3.7)	CRAMP1L (3.2)	CCNL1 (3.1)	EIF2C2 (2.9)	XPO7 (2.8)	PRRX1 (2.7)	ST7-AS1 (2.5)	ARID2 (2.5)	ENSG00000235919 (2.3)	FOXP1 (2.3)
MP:0011143	thick lung-associated mesenchyme	0.000387	0.00171	<0.20	3.41229	2.767	0.645285	LRIG1 (5.4)	WNT11 (4.2)	FGF18 (4.1)	DMRTA2 (3.8)	MUC1 (3.7)	ENSG00000244967 (3.5)	NFIA (3.2)	THBS3 (3.1)	ENSG00000182873 (3.0)	ZFPM2 (3.0)
MP:0002746	abnormal semilunar valve morphology	0.000453	0.06	<0.20	3.3439	1.22185	2.12205	CRIM1 (5.2)	CRLF1 (4.5)	ADAMTSL3 (3.6)	LAMB2 (3.5)	BMPR1A (3.5)	PODXL (3.3)	PDLIM5 (3.2)	NFIA (3.0)	LRIG1 (3.0)	FGFR1 (2.9)
MP:0000749	muscle degeneration	0.000461	0.00212	<0.20	3.3363	2.67366	0.662635	LDB3 (7.6)	SYPL2 (7.5)	ENO3 (7.0)	SYNPO2L (6.8)	TRDN (6.6)	SRL (6.2)	XIRP1 (6.0)	TTN (6.0)	DUSP13 (5.8)	CEFIP (5.7)
MP:0004157	interrupted aortic arch	0.000475	0.07	<0.20	3.32331	1.1549	2.1684	IRX3 (4.2)	FIGN (3.9)	CRLF1 (3.7)	SEMA3A (3.5)	FERMT2 (3.5)	NR2F1 (3.3)	EPAS1 (3.3)	ENSG00000238018 (3.3)	ACVR2B (3.2)	ENSG00000230525 (3.2)
MP:0002109	abnormal limb morphology	0.000483	0.06	<0.20	3.31605	1.22185	2.0942	FGFR1 (5.4)	PRRX1 (4.8)	FGFR2 (4.4)	NKD2 (3.9)	TMEM26 (3.4)	FKBP7 (3.3)	COL13A1 (3.2)	HSPG2 (3.2)	FAT1 (3.1)	WNT11 (3.1)
MP:0000729	abnormal myogenesis	0.000487	0.03	<0.20	3.31247	1.52288	1.78959	PITX3 (8.1)	FGF5 (4.1)	ALPK3 (3.7)	SYNPO2L (3.7)	DUSP13 (3.2)	DES (3.1)	TMEM182 (3.1)	CAV1 (3.1)	WNT9A (3.1)	EMILIN3 (3.0)
MP:0003209	abnormal pulmonary elastic fiber morphology	0.00059	0.02	<0.20	3.22915	1.69897	1.53018	MUC1 (5.5)	FKBP7 (4.5)	COL13A1 (4.5)	MEIS1 (4.4)	CAV2 (4.2)	TCF21 (4.0)	SSPN (3.7)	VEPH1 (3.6)	TBX5 (3.5)	SDPR (3.2)
MP:0002332	abnormal exercise endurance	0.000629	0.000177	<0.01	3.20135	3.75203	-0.550677	SYPL2 (6.7)	TRDN (5.0)	DUSP13 (4.5)	MYOZ1 (4.4)	CAV1 (4.4)	CAV2 (4.2)	OBSCN (4.1)	PPAPDC3 (3.9)	CEFIP (3.9)	SRL (3.9)
MP:0000750	abnormal muscle regeneration	0.000644	0.03	<0.20	3.19111	1.52288	1.66824	DUSP13 (5.2)	SYPL2 (5.2)	PITX3 (5.0)	CAV1 (4.7)	ALPK3 (4.5)	DES (4.2)	CEFIP (4.1)	SYNPO2L (3.7)	XIRP1 (3.6)	TTN (3.6)
MP:0005508	abnormal skeleton morphology	0.000701	0.00745	<0.20	3.15428	2.12784	1.02644	FGFR2 (5.7)	FKBP7 (4.3)	WNT11 (3.9)	COL13A1 (3.7)	PDZRN3 (3.6)	CHADL (3.5)	FGFR1 (3.5)	TLE3 (3.4)	PRRX1 (3.4)	THBS3 (3.4)
MP:0004130	abnormal muscle cell glucose uptake	0.000753	0.02	<0.20	3.12321	1.69897	1.42424	TMEM182 (4.3)	SYPL2 (4.3)	SSPN (3.7)	OBSCN (3.6)	SORT1 (3.5)	DUSP13 (3.3)	TRDN (3.3)	PPAPDC3 (3.3)	ADCK3 (3.2)	ALPK3 (3.0)
MP:0001722	pale yolk sac	0.000754	0.02	<0.20	3.12263	1.69897	1.42366	ZFPM1 (5.1)	MAP3K11 (3.8)	EIF2C2 (3.6)	AFF1 (3.5)	EML4 (3.1)	ZMIZ1 (3.1)	ZNF609 (3.1)	SKI (3.1)	EPAS1 (3.0)	ZNF592 (2.9)
MP:0001958	emphysema	0.000789	0.03	<0.20	3.10292	1.52288	1.58004	DPT (4.9)	TCF21 (4.6)	VEPH1 (4.6)	MUC1 (4.5)	MEIS1 (3.8)	RTKN2 (3.4)	PDZRN3 (3.4)	TBX5 (3.3)	MACF1 (3.2)	FGF18 (3.1)
MP:0009657	failure of chorioallantoic fusion	0.00079	0.00105	<0.20	3.10237	2.97881	0.123562	GJA1 (3.9)	TBX3 (3.8)	RFX4 (3.7)	CAV1 (3.4)	RCBTB1 (3.3)	TBX5 (3.0)	FERMT2 (2.8)	BMPR1A (2.8)	COL13A1 (2.7)	DCBLD1 (2.5)
MP:0001879	abnormal lymphatic vessel morphology	0.000796	0.56	<0.20	3.09909	0.251812	2.84727	TMEM204 (5.1)	VPREB3 (4.6)	EPAS1 (4.4)	SDPR (3.9)	CD79B (3.8)	PODXL (3.7)	EFNA1 (3.5)	HLX (3.2)	HSPG2 (2.7)	GP1BA (2.7)
MP:0011110	partial preweaning lethality	0.000805	0.03	<0.20	3.0942	1.52288	1.57133	FLRT2 (3.5)	FGFR2 (3.2)	C5orf13 (3.1)	XPO4 (3.0)	ZFPM1 (2.9)	FREM2 (2.8)	GJA1 (2.8)	MSX2 (2.7)	SLC25A38 (2.5)	SLC27A6 (2.5)
MP:0008533	abnormal anterior visceral endoderm morphology	0.000882	0.01	<0.20	3.05453	2	1.05453	ACVR2B (4.5)	SLC35F1 (3.2)	EP300 (2.8)	AFF1 (2.7)	ENSG00000230525 (2.6)	CLK2 (2.6)	FGF5 (2.3)	FREM2 (2.3)	ZCCHC24 (2.3)	PODXL (2.3)
MP:0009414	skeletal muscle fiber necrosis	0.000886	0.000912	<0.05	3.05257	3.04001	0.0125611	SYPL2 (6.9)	LDB3 (6.3)	DUSP13 (6.2)	XIRP1 (6.0)	TRDN (5.6)	CEFIP (5.6)	MYOZ1 (5.1)	ENO3 (5.1)	SYNPO2L (5.0)	SRL (5.0)
MP:0005031	abnormal trophoblast layer morphology	0.000916	0.21	<0.20	3.0381	0.677781	2.36032	FNDC3B (3.5)	SIPA1L2 (3.1)	DAG1 (3.1)	PHLDB2 (3.0)	EML4 (2.7)	SPTBN1 (2.7)	HSPG2 (2.7)	TMEM26 (2.7)	LAMB2 (2.7)	MSX2 (2.6)
MP:0004921	decreased placenta weight	0.00104	0.00592	<0.20	2.98297	2.22768	0.755288	OBSL1 (4.0)	MARK3 (3.4)	CCNL1 (3.2)	DLC1 (2.9)	ENSG00000176354 (2.9)	CDKN1A (2.8)	IP6K2 (2.7)	FNDC3B (2.7)	ST7 (2.6)	WNT11 (2.6)
Protein-protein interaction subnetworks
ENSG00000182809	CRIP2 PPI subnetwork	8.79e-13	0.000271	<0.05	12.056	3.56703	8.48898	MYH6 (8.7)	ADPRHL1 (8.5)	SYNPO2L (8.5)	MYH7 (8.4)	XIRP1 (8.1)	TTN (7.9)	LDB3 (7.5)	PLN (7.4)	CEFIP (7.0)	SRL (6.9)
ENSG00000162889	MAPKAPK2 PPI subnetwork	3.98e-12	0.00179	<0.20	11.4001	2.74715	8.65297	PLN (4.2)	ALPK3 (4.2)	ADPRHL1 (4.2)	CEFIP (4.1)	MYH6 (4.1)	MYH7 (4.0)	LDB3 (3.9)	SPEG (3.9)	OBSCN (3.8)	SYNPO2L (3.8)
ENSG00000118194	TNNT2 PPI subnetwork	6.48e-12	0.000555	<0.05	11.1884	3.25571	7.93272	MYH6 (6.4)	MYH7 (6.4)	SYNPO2L (5.8)	LDB3 (5.3)	TTN (5.3)	PLN (4.9)	CEFIP (4.8)	TRDN (4.6)	ALPK3 (4.5)	ENO3 (4.5)
ENSG00000115641	FHL2 PPI subnetwork	1.17e-11	4.42e-05	<0.01	10.9318	4.35458	6.57724	XIRP1 (4.7)	ENO3 (4.5)	TRDN (4.2)	LDB3 (4.2)	FBXO32 (4.1)	CEFIP (3.9)	MYOZ1 (3.9)	DES (3.8)	SYNPO2L (3.7)	MYH7 (3.6)
ENSG00000182533	CAV3 PPI subnetwork	3.41e-11	3.68e-05	<0.01	10.4672	4.43415	6.03309	MYH6 (4.6)	MYH7 (4.1)	ALPK3 (4.0)	MTUS1 (3.9)	SCN5A (3.8)	SYNPO2L (3.7)	HSPG2 (3.7)	PLN (3.7)	CEFIP (3.6)	LDB3 (3.6)
ENSG00000172399	MYOZ2 PPI subnetwork	3.62e-11	7.03e-05	<0.01	10.4413	4.15304	6.28825	TTN (9.0)	LDB3 (8.6)	MYH7 (8.5)	XIRP1 (8.5)	SYNPO2L (8.4)	MYH6 (8.4)	SRL (8.3)	TRDN (7.8)	CEFIP (7.6)	OBSCN (7.4)
ENSG00000152661	GJA1 PPI subnetwork	5.39e-11	0.000136	<0.01	10.2684	3.86646	6.40195	MYH6 (4.3)	CAMK2D (3.9)	MYH7 (3.9)	HSPG2 (3.6)	CAV2 (3.4)	PLCD1 (3.4)	ADPRHL1 (3.2)	TBX5 (3.2)	CRYAB (3.2)	SLC27A6 (3.2)
ENSG00000072110	ACTN1 PPI subnetwork	5.58e-11	0.000429	<0.05	10.2534	3.36754	6.88582	PDLIM5 (5.3)	SYNPO2L (4.8)	MYH7 (4.4)	LDB3 (4.4)	DES (4.4)	DTNA (4.4)	TRDN (4.3)	ENO3 (4.2)	SRL (4.1)	PLN (3.8)
ENSG00000112304	ACOT13 PPI subnetwork	7.65e-11	0.00112	<0.20	10.1163	2.95078	7.16556	MYH7 (7.9)	TTN (7.5)	MYH6 (7.3)	SYNPO2L (7.3)	LDB3 (7.0)	XIRP1 (6.8)	OBSCN (6.8)	ENO3 (6.5)	SRL (6.4)	CEFIP (6.3)
ENSG00000143632	ACTA1 PPI subnetwork	1.54e-10	0.00102	<0.20	9.81248	2.9914	6.82108	DES (5.0)	PDLIM5 (4.3)	FHL2 (4.0)	ENO3 (3.8)	KIAA0754 (3.8)	MYOZ1 (3.7)	TRDN (3.7)	CRYAB (3.6)	MACF1 (3.4)	SRL (3.3)
ENSG00000124575	HIST1H1D PPI subnetwork	2.02e-10	0.00264	<0.20	9.69465	2.5784	7.11625	MYH7 (8.0)	LDB3 (7.6)	MYH6 (7.5)	TTN (7.5)	SRL (7.2)	XIRP1 (7.0)	SYNPO2L (6.9)	OBSCN (6.8)	ADPRHL1 (6.8)	ENO3 (6.4)
ENSG00000084754	HADHA PPI subnetwork	2.17e-10	0.00495	<0.20	9.66354	2.30539	7.35815	MYH7 (7.7)	TTN (7.4)	MYH6 (7.4)	SYNPO2L (7.0)	XIRP1 (6.9)	LDB3 (6.8)	OBSCN (6.6)	SRL (6.2)	ADPRHL1 (6.1)	TRDN (5.9)
ENSG00000104325	DECR1 PPI subnetwork	3.91e-10	0.000563	<0.05	9.40782	3.24949	6.15833	MYH6 (7.9)	MYH7 (7.3)	SYNPO2L (7.2)	TTN (7.2)	ADPRHL1 (7.0)	XIRP1 (7.0)	LDB3 (7.0)	SRL (6.7)	ENO3 (6.6)	OBSCN (6.6)
ENSG00000175084	DES PPI subnetwork	4e-10	9.77e-05	<0.01	9.39794	4.01011	5.38783	MYH7 (6.0)	CEFIP (5.8)	ENO3 (5.7)	TRDN (5.5)	LDB3 (5.4)	SRL (5.4)	TTN (5.4)	SYNPO2L (5.2)	DES (5.2)	XIRP1 (5.1)
ENSG00000167110	GOLGA2 PPI subnetwork	4.99e-10	6.19e-07	<0.01	9.3019	6.20831	3.09359	MYH6 (4.1)	C12orf23 (3.9)	ALPK3 (3.9)	MYH7 (3.8)	PLN (3.7)	XIRP1 (3.7)	LDB3 (3.7)	SYNPO2L (3.6)	NKX2-5 (3.5)	CEFIP (3.4)
ENSG00000197451	HNRNPAB PPI subnetwork	6.17e-10	0.00202	<0.20	9.20971	2.69465	6.51507	MYH7 (7.4)	TTN (7.2)	XIRP1 (6.9)	LDB3 (6.7)	ADPRHL1 (6.6)	MYH6 (6.5)	SYNPO2L (6.5)	CEFIP (6.3)	OBSCN (6.2)	SRL (6.1)
ENSG00000151923	TIAL1 PPI subnetwork	9.26e-10	0.0018	<0.20	9.03339	2.74473	6.28866	MYH7 (7.1)	MYH6 (6.7)	TTN (6.6)	XIRP1 (6.6)	SYNPO2L (6.4)	CEFIP (6.2)	ADPRHL1 (6.1)	LDB3 (6.1)	OBSCN (6.1)	SRL (6.0)
ENSG00000077522	ACTN2 PPI subnetwork	1.15e-09	8.95e-05	<0.01	8.9393	4.04818	4.89113	RYR2 (4.0)	PDLIM5 (4.0)	XIRP1 (3.6)	ENO3 (3.4)	BSN (3.2)	SYPL2 (3.2)	OBSCN (3.1)	CEFIP (3.1)	TRDN (3.1)	DGKB (3.1)
ENSG00000007171	NOS2 PPI subnetwork	1.23e-09	0.00114	<0.20	8.91009	2.9431	5.967	MYH7 (4.8)	MYH6 (4.8)	SYNPO2L (4.6)	LDB3 (4.3)	PLN (4.1)	TTN (4.0)	ALPK3 (3.9)	NKX2-5 (3.6)	ENO3 (3.6)	DES (3.5)
ENSG00000142208	AKT1 PPI subnetwork	1.41e-09	0.000148	<0.01	8.85078	3.82974	5.02104	MAP3K3 (4.2)	MTUS1 (3.3)	FOXP1 (3.3)	STRN (3.2)	EIF2C2 (3.1)	NFKBIA (3.0)	SSH2 (3.0)	TSC22D2 (2.9)	SKI (2.7)	MGEA5 (2.7)
ENSG00000111245	MYL2 PPI subnetwork	2.14e-09	0.000826	<0.05	8.66959	3.08302	5.58657	MYH6 (5.0)	LDB3 (4.8)	MYH7 (4.7)	SYNPO2L (4.7)	ALPK3 (4.6)	PLN (4.3)	TTN (4.2)	CEFIP (4.0)	ENO3 (4.0)	SRL (3.9)
ENSG00000152137	HSPB8 PPI subnetwork	2.34e-09	0.00027	<0.05	8.63078	3.56864	5.06215	CRYAB (6.5)	DTNA (5.8)	DES (5.6)	OBSCN (5.6)	ALPK3 (5.2)	MYH7 (5.1)	LDB3 (5.0)	TRDN (4.9)	XIRP1 (4.8)	TTN (4.6)
ENSG00000163806	SPDYA PPI subnetwork	2.35e-09	1.54e-05	<0.01	8.62893	4.81248	3.81645	DES (4.5)	SRL (4.0)	ENO3 (3.9)	LDB3 (3.7)	SYNPO2L (3.7)	PDLIM5 (3.7)	CORO6 (3.6)	TTN (3.5)	MYOCD (3.4)	MYH7 (3.4)
ENSG00000113555	PCDH12 PPI subnetwork	2.67e-09	0.00062	<0.05	8.57349	3.20761	5.36588	MYH6 (7.7)	SYNPO2L (7.1)	TTN (7.1)	MYH7 (7.1)	XIRP1 (6.9)	LDB3 (6.9)	ADPRHL1 (6.8)	ENO3 (6.6)	OBSCN (6.5)	SRL (6.5)
ENSG00000130402	ACTN4 PPI subnetwork	3.35e-09	0.000782	<0.05	8.47496	3.10679	5.36816	DES (4.2)	LDB3 (3.7)	XIRP1 (3.6)	PFN1 (3.6)	TTN (3.6)	PDLIM5 (3.6)	SUN1 (3.5)	TRDN (3.5)	ENO3 (3.4)	KCTD10 (3.3)
ENSG00000102010	BMX PPI subnetwork	3.53e-09	0.000629	<0.05	8.45223	3.20135	5.25088	CAV2 (3.7)	MYH7 (3.3)	SYNPO2L (3.3)	MYH6 (3.3)	SDPR (3.1)	PLN (3.0)	NR3C1 (2.9)	PDLIM5 (2.9)	CEFIP (2.6)	FHL2 (2.6)
ENSG00000137076	TLN1 PPI subnetwork	4.5e-09	5.81e-05	<0.01	8.34679	4.23582	4.11096	PLEC (3.8)	MACF1 (3.7)	DOK2 (3.1)	SSBP3 (3.0)	CAMK2G (3.0)	ITGB1 (2.8)	PFN1 (2.7)	PHLDB2 (2.6)	EMB (2.6)	SLC6A4 (2.6)
ENSG00000197616	MYH6 PPI subnetwork	5.43e-09	0.00407	<0.20	8.2652	2.39041	5.87479	MYH6 (9.1)	TTN (7.4)	MYH7 (7.4)	OBSCN (7.1)	SYNPO2L (7.1)	XIRP1 (7.0)	CEFIP (7.0)	SRL (6.6)	ADPRHL1 (6.6)	ENO3 (6.5)
ENSG00000100345	MYH9 PPI subnetwork	6.15e-09	3.77e-06	<0.01	8.21112	5.42366	2.78747	DES (5.5)	PLN (4.7)	MYOCD (4.4)	MACF1 (4.2)	ENO3 (3.9)	RBPMS (3.9)	KCTD10 (3.8)	PDLIM5 (3.7)	PFN1 (3.7)	LDB3 (3.5)
ENSG00000104879	CKM PPI subnetwork	6.68e-09	0.00989	<0.20	8.17522	2.0048	6.17042	MYH7 (8.3)	MYH6 (8.1)	TTN (8.0)	ADPRHL1 (7.7)	LDB3 (7.5)	OBSCN (7.5)	SRL (7.3)	SYNPO2L (7.2)	XIRP1 (7.2)	ENO3 (6.7)
ENSG00000129152	MYOD1 PPI subnetwork	6.86e-09	0.00632	<0.20	8.16368	2.19928	5.96439	ID2 (7.8)	ZNF503 (4.7)	TBX3 (4.3)	ZNF592 (3.7)	SSPN (3.6)	ZMIZ1 (3.5)	TFEB (3.4)	MSX2 (3.4)	ENSG00000237125 (3.3)	FBXO32 (3.2)
ENSG00000085662	AKR1B1 PPI subnetwork	7.61e-09	0.000163	<0.01	8.11862	3.78781	4.3308	MYH7 (5.5)	MYH6 (4.9)	SYNPO2L (4.7)	PLN (4.4)	NKX2-5 (4.4)	LDB3 (4.0)	ENO3 (3.6)	ADPRHL1 (3.6)	TTN (3.6)	XIRP1 (3.5)
ENSG00000168530	MYL1 PPI subnetwork	7.73e-09	0.000205	<0.01	8.11182	3.68825	4.42357	DES (6.6)	LDB3 (5.7)	TRDN (5.5)	PLN (5.4)	SPEG (5.4)	MYOZ1 (5.2)	MYOCD (5.0)	PDLIM5 (4.8)	FHL2 (4.7)	ENO3 (4.7)
ENSG00000100292	HMOX1 PPI subnetwork	1.02e-08	0.00369	<0.20	7.9914	2.43297	5.55843	MYH7 (5.1)	SYNPO2L (5.0)	MYH6 (4.9)	PLN (4.4)	TTN (4.4)	LDB3 (4.4)	CEFIP (3.9)	ALPK3 (3.9)	TRDN (3.8)	ENO3 (3.7)
ENSG00000106554	CHCHD3 PPI subnetwork	1.4e-08	0.00934	<0.20	7.85387	2.02965	5.82422	MYH7 (7.9)	MYH6 (7.3)	TTN (6.9)	LDB3 (6.8)	SYNPO2L (6.7)	ADPRHL1 (6.5)	XIRP1 (6.3)	SRL (6.3)	OBSCN (6.3)	CEFIP (5.9)
ENSG00000114854	TNNC1 PPI subnetwork	1.41e-08	0.0014	<0.20	7.85078	2.85387	4.99691	MYH7 (10.6)	TTN (10.3)	SYNPO2L (9.8)	LDB3 (9.0)	MYH6 (8.9)	ENO3 (8.7)	SRL (8.5)	TRDN (8.5)	XIRP1 (8.2)	CEFIP (7.9)
ENSG00000107242	PIP5K1B PPI subnetwork	1.49e-08	4.63e-06	<0.01	7.82681	5.33442	2.49239	PDLIM5 (4.4)	SPEG (4.3)	DES (3.6)	CRYAB (3.4)	LDB3 (3.2)	ITGB1 (3.2)	ADCY5 (3.2)	RYR2 (3.1)	LRRFIP2 (3.0)	USP28 (3.0)
ENSG00000035403	VCL PPI subnetwork	1.53e-08	0.000464	<0.05	7.81531	3.33348	4.48183	PDLIM5 (4.3)	HSPG2 (4.2)	XIRP1 (3.9)	DES (3.8)	LDB3 (3.7)	ITGB1 (3.6)	ENO3 (3.6)	TTN (3.5)	PFN1 (3.5)	RHOA (3.4)
ENSG00000164867	NOS3 PPI subnetwork	1.57e-08	0.000673	<0.05	7.8041	3.17198	4.63212	MYH7 (4.5)	SYNPO2L (4.0)	PLN (3.8)	MYOCD (3.7)	MYH6 (3.5)	LDB3 (3.4)	CEFIP (3.3)	RBPMS (3.2)	EPAS1 (3.2)	NKX2-5 (3.2)
ENSG00000151729	SLC25A4 PPI subnetwork	1.67e-08	2.08e-05	<0.01	7.77728	4.68194	3.09535	PFN1 (3.3)	RHOA (3.0)	ACO2 (3.0)	SPTBN1 (3.0)	SDPR (2.9)	NKX2-5 (2.8)	CDC42BPA (2.8)	CYC1 (2.7)	MYH6 (2.7)	FHL2 (2.6)
ENSG00000108854	SMURF2 PPI subnetwork	1.85e-08	1.3e-06	<0.01	7.73283	5.88606	1.84677	TRDN (6.2)	ENO3 (5.9)	TTN (5.5)	SRL (5.3)	SYNPO2L (5.3)	XIRP1 (5.2)	MYH7 (5.1)	LDB3 (5.1)	MYOZ1 (4.9)	PDLIM5 (4.9)
ENSG00000117118	SDHB PPI subnetwork	2.1e-08	0.00596	<0.20	7.67778	2.22475	5.45303	MYH7 (8.0)	MYH6 (8.0)	TTN (7.8)	SYNPO2L (7.4)	LDB3 (7.3)	XIRP1 (7.2)	SRL (7.1)	OBSCN (7.1)	ENO3 (6.8)	ADPRHL1 (6.7)
ENSG00000129170	CSRP3 PPI subnetwork	2.57e-08	0.0013	<0.20	7.59007	2.88606	4.70401	TTN (9.3)	SYNPO2L (9.1)	SRL (8.4)	XIRP1 (8.3)	LDB3 (7.9)	CEFIP (7.7)	TRDN (7.3)	ENO3 (7.3)	DES (7.1)	MYOZ1 (7.1)
ENSG00000177791	MYOZ1 PPI subnetwork	2.72e-08	4e-05	<0.01	7.56543	4.39794	3.16749	TRDN (7.5)	SRL (7.4)	XIRP1 (7.2)	TTN (7.0)	MYH7 (6.5)	MYOZ1 (6.4)	DES (6.4)	SYNPO2L (6.1)	CEFIP (6.1)	LDB3 (5.8)
ENSG00000077549	CAPZB PPI subnetwork	3.09e-08	0.000485	<0.05	7.51004	3.31426	4.19578	PFN1 (4.3)	RHOA (3.9)	OSBPL9 (3.8)	GNAI3 (3.7)	SH3BGRL3 (3.5)	EFHA1 (3.2)	SEPT7 (3.2)	CAPZA2 (3.1)	KCTD10 (3.1)	XIRP1 (3.0)
ENSG00000183072	NKX2-5 PPI subnetwork	4.88e-08	0.000681	<0.05	7.31158	3.16685	4.14473	TCF21 (5.6)	TBX20 (5.2)	AMT (4.4)	MYOCD (4.2)	SLC8A1 (4.0)	CHRM2 (4.0)	NKX2-5 (4.0)	MYH6 (4.0)	RYR2 (3.6)	OBSL1 (3.6)
ENSG00000198467	TPM2 PPI subnetwork	4.94e-08	0.00012	<0.01	7.30627	3.92082	3.38545	CAV1 (4.4)	KCTD10 (4.0)	FERMT2 (4.0)	CRYAB (3.9)	ENO3 (3.5)	DES (3.3)	CAV2 (3.1)	MYOCD (3.1)	FHL2 (3.1)	CTTNBP2NL (3.0)
ENSG00000122180	MYOG PPI subnetwork	4.97e-08	0.00165	<0.20	7.30364	2.78252	4.52113	ID2 (5.5)	SYNPO2L (4.0)	TBX3 (3.8)	XIRP1 (3.2)	DES (3.2)	SSBP3 (3.2)	TTN (3.0)	TBX5 (2.9)	CCDC141 (2.9)	PRKAB2 (2.9)
ENSG00000109846	CRYAB PPI subnetwork	4.98e-08	1.6e-06	<0.01	7.30277	5.79588	1.50689	MYH7 (5.5)	NDRG4 (5.5)	CRYAB (5.0)	ALPK3 (4.6)	MYH6 (4.5)	LDB3 (4.4)	CEFIP (4.2)	SYNPO2L (4.2)	XIRP1 (4.2)	TRDN (3.9)
ENSG00000100644	HIF1A PPI subnetwork	5.81e-08	0.000345	<0.05	7.23582	3.46218	3.77364	CDKN1A (3.7)	CEFIP (3.2)	MYH6 (3.2)	SSH2 (3.1)	MYH7 (3.1)	ADPRHL1 (3.1)	C6orf204 (2.8)	SYNPO2L (2.7)	MTUS1 (2.6)	TLE3 (2.5)
ENSG00000112062	MAPK14 PPI subnetwork	9.51e-08	0.00367	<0.20	7.02182	2.43533	4.58649	CSRNP1 (4.6)	ID2 (4.1)	CCNL1 (3.8)	CDKN1A (3.8)	NFKBIA (3.1)	MAP7D1 (3.0)	CAMK2D (2.9)	CORO6 (2.8)	ARIH2 (2.7)	SPATA20 (2.6)
ENSG00000124788	ATXN1 PPI subnetwork	9.95e-08	0.000841	<0.05	7.00218	3.0752	3.92697	YY1AP1 (4.3)	CLK2 (3.9)	KIAA0913 (3.9)	MAPK8IP3 (3.5)	PABPN1 (3.4)	ASH1L (3.3)	CAMK2G (3.2)	SEC24C (3.0)	RUSC1-AS1 (2.9)	CRAMP1L (2.9)
ENSG00000136842	TMOD1 PPI subnetwork	1.09e-07	0.0037	<0.20	6.96257	2.4318	4.53078	TTN (9.5)	MYH7 (9.3)	SYNPO2L (8.6)	LDB3 (8.3)	TRDN (8.2)	XIRP1 (8.2)	MYH6 (8.2)	SRL (8.1)	ENO3 (7.9)	MYOZ1 (7.4)
ENSG00000150093	ITGB1 PPI subnetwork	1.24e-07	0.00845	<0.20	6.90658	2.07314	4.83344	ITGB1 (6.0)	HSPG2 (5.5)	CAV1 (5.3)	FERMT2 (4.7)	LAMB2 (4.4)	TMEM204 (4.0)	ITGAV (3.9)	PHLDB2 (3.7)	GJA1 (3.7)	EPAS1 (3.7)
ENSG00000050748	MAPK9 PPI subnetwork	1.34e-07	0.00324	<0.20	6.8729	2.48945	4.38344	CSRNP1 (5.8)	CCNL1 (5.1)	RAP2B (3.6)	CAPZA2 (3.1)	NEURL (3.1)	CDKN1A (2.9)	CAMK2D (2.9)	NFKBIA (2.8)	C10orf76 (2.7)	ID2 (2.6)
ENSG00000073756	PTGS2 PPI subnetwork	1.55e-07	0.00182	<0.20	6.80967	2.73993	4.06974	MYH7 (4.5)	MYH6 (4.1)	SYNPO2L (4.0)	ALPK3 (3.7)	NKX2-5 (3.7)	PLN (3.6)	CEFIP (3.5)	LDB3 (3.5)	TTN (3.4)	ENO3 (3.2)
ENSG00000173372	C1QA PPI subnetwork	1.57e-07	0.00259	<0.20	6.8041	2.5867	4.2174	ADPRHL1 (5.5)	MYH6 (5.4)	MYH7 (5.4)	SYNPO2L (5.1)	TTN (5.0)	SRL (4.7)	LDB3 (4.7)	CEFIP (4.7)	OBSCN (4.6)	TMEM182 (4.4)
ENSG00000136574	GATA4 PPI subnetwork	1.75e-07	0.000224	<0.05	6.75696	3.64975	3.10721	SLC8A1 (4.5)	RYR2 (3.8)	TBX20 (3.7)	TFEB (3.6)	MYH6 (3.5)	CRAMP1L (3.4)	MYOCD (3.4)	MAP3K3 (3.3)	FGF12 (3.1)	KLHDC8B (3.1)
ENSG00000129991	TNNI3 PPI subnetwork	2.05e-07	0.00266	<0.20	6.68825	2.57512	4.11313	MYH7 (9.7)	TTN (9.1)	LDB3 (8.4)	SYNPO2L (8.1)	MYH6 (8.1)	SRL (7.9)	CEFIP (7.8)	ENO3 (7.8)	TRDN (7.6)	XIRP1 (7.5)
ENSG00000103653	CSK PPI subnetwork	2.1e-07	0.00115	<0.20	6.67778	2.9393	3.73848	CX3CR1 (4.8)	CALHM2 (4.0)	DOK2 (4.0)	CAV2 (3.7)	MACF1 (3.7)	ITGB1 (3.6)	MET (3.6)	ZNF683 (3.2)	HSPG2 (3.1)	MAP7D1 (3.1)
ENSG00000058272	PPP1R12A PPI subnetwork	2.79e-07	0.00035	<0.05	6.5544	3.45593	3.09846	DES (4.6)	PFN1 (4.4)	ITGB1 (3.9)	PDLIM5 (3.7)	MACF1 (3.7)	SEPT7 (3.6)	CRYAB (3.6)	SPTBN1 (3.5)	PLN (3.5)	SRL (3.5)
ENSG00000166033	HTRA1 PPI subnetwork	3.43e-07	0.00977	<0.20	6.46471	2.01011	4.4546	CDC42BPA (3.7)	CAV1 (3.6)	PHLDB2 (3.4)	FERMT2 (3.2)	AIM1L (3.1)	ADAMTSL3 (3.0)	CRIM1 (2.9)	LAMB2 (2.8)	MTUS1 (2.7)	KCTD10 (2.7)
ENSG00000092841	MYL6 PPI subnetwork	3.53e-07	1.27e-05	<0.01	6.45223	4.8962	1.55603	PFN1 (5.7)	RHOA (4.7)	CAPZA2 (4.0)	TES (3.8)	MYOCD (3.7)	KCTD10 (3.6)	SEPT7 (3.6)	RBPMS (3.6)	FHL2 (3.5)	MACF1 (3.5)
ENSG00000152795	HNRPDL PPI subnetwork	4.01e-07	0.00132	<0.20	6.39686	2.87943	3.51743	MYH7 (6.5)	MYH6 (6.2)	LDB3 (5.9)	TTN (5.8)	SYNPO2L (5.7)	ADPRHL1 (5.5)	OBSCN (5.5)	XIRP1 (5.4)	CEFIP (5.4)	SRL (5.3)
ENSG00000136153	LMO7 PPI subnetwork	5.24e-07	0.000263	<0.05	6.28067	3.58004	2.70062	PLEC (3.8)	PHLDB2 (3.3)	DCBLD1 (3.3)	SPEG (3.1)	ITGB1 (3.1)	SPTBN1 (3.1)	MACF1 (3.0)	FHL2 (3.0)	CALHM3 (3.0)	CAV1 (3.0)
ENSG00000105357	MYH14 PPI subnetwork	5.47e-07	0.000345	<0.05	6.26201	3.46218	2.79983	MYOZ1 (4.5)	ENO3 (4.3)	FERMT2 (4.0)	TRDN (3.8)	KCTD10 (3.6)	PDLIM5 (3.5)	DES (3.5)	TTN (3.4)	MYH7 (3.4)	CORO6 (3.3)
ENSG00000067191	CACNB1 PPI subnetwork	7.05e-07	0.00189	<0.20	6.15181	2.72354	3.42827	CKB (3.4)	RCAN2 (3.3)	NDRG4 (3.2)	ADCY5 (2.9)	MAP7D1 (2.8)	OBSCN (2.7)	DES (2.7)	ZMIZ1 (2.6)	RBPMS2 (2.5)	LPHN3 (2.4)
ENSG00000112658	SRF PPI subnetwork	9.62e-07	0.02	<0.20	6.01682	1.69897	4.31785	DES (3.7)	PITX3 (3.6)	MAP7D1 (3.3)	OBSL1 (3.1)	ZCCHC24 (2.9)	ZNF219 (2.9)	ZC3H7B (2.9)	MAP3K11 (2.8)	PLN (2.8)	TLE3 (2.7)
ENSG00000135387	CAPRIN1 PPI subnetwork	1.04e-06	2.3e-05	<0.01	5.98297	4.63827	1.34469	PLN (3.8)	HPS6 (3.6)	PPRC1 (3.3)	KPNA3-IT1 (2.9)	AFF1 (2.8)	RELA (2.7)	OPN4 (2.7)	ZNF219 (2.7)	NKX2-5 (2.7)	FNDC3A (2.6)
ENSG00000185532	PRKG1 PPI subnetwork	1.04e-06	0.000147	<0.01	5.98297	3.83268	2.15028	DES (6.7)	MYOCD (5.6)	SPEG (5.2)	RBPMS2 (4.3)	RBPMS (4.1)	PLN (4.1)	MYOZ1 (4.0)	TRDN (3.7)	LDB3 (3.5)	MYH7 (3.5)
ENSG00000159251	ACTC1 PPI subnetwork	1.06e-06	8.73e-05	<0.01	5.97469	4.05899	1.91571	MYOCD (4.7)	DES (4.6)	SPEG (4.1)	RBPMS (3.9)	PDLIM5 (3.9)	CRYAB (3.6)	PLN (3.5)	CAV1 (3.5)	PFN1 (3.4)	CAV2 (3.4)
ENSG00000172602	RND1 PPI subnetwork	1.3e-06	2.27e-05	<0.01	5.88606	4.64397	1.24208	ID2 (4.1)	GORASP1 (3.8)	BCL2L2 (3.7)	FAT1 (3.3)	CTTNBP2NL (3.0)	BMPR1A (2.8)	CHPF (2.7)	NAV2 (2.7)	C12orf23 (2.6)	MARCKS (2.5)
ENSG00000004975	DVL2 PPI subnetwork	1.36e-06	0.04	<0.20	5.86646	1.39794	4.46852	CBX8 (3.6)	CDH2 (3.6)	FGFR1 (3.4)	ARHGEF40 (2.9)	ZNF358 (2.9)	CRAMP1L (2.7)	DAG1 (2.7)	C16orf42 (2.6)	C5orf13 (2.6)	NAV2 (2.6)
ENSG00000213639	PPP1CB PPI subnetwork	1.38e-06	0.000285	<0.05	5.86012	3.54516	2.31497	MYOCD (3.8)	DES (3.4)	PFN1 (3.1)	RBPMS (3.0)	C1orf183 (2.8)	DPCD (2.7)	KCTD10 (2.7)	PLN (2.7)	SH3BGRL3 (2.6)	IFT88 (2.5)
ENSG00000107404	DVL1 PPI subnetwork	1.55e-06	0.00944	<0.20	5.80967	2.02503	3.78464	C5orf13 (3.5)	ID2 (3.4)	CDH2 (3.4)	TLE3 (3.3)	BMPR1A (3.2)	SKI (3.2)	NAV2 (3.1)	DAG1 (3.1)	FGFR1 (3.1)	ACVR2B (3.0)
ENSG00000172531	PPP1CA PPI subnetwork	1.88e-06	0.02	<0.20	5.72584	1.69897	4.02687	STRN (3.5)	STK11 (2.9)	SYNPO2L (2.8)	XIRP1 (2.8)	TTN (2.8)	TRDN (2.7)	TSC22D2 (2.7)	BMPR1A (2.6)	LDB3 (2.6)	MAP3K3 (2.5)
ENSG00000158022	TRIM63 PPI subnetwork	1.92e-06	0.000898	<0.05	5.7167	3.04672	2.66998	TTN (10.3)	TRDN (10.1)	ENO3 (9.6)	MYH7 (9.5)	SRL (9.5)	LDB3 (9.3)	SYNPO2L (9.2)	XIRP1 (8.3)	CEFIP (8.2)	MYH6 (8.1)
ENSG00000066032	CTNNA2 PPI subnetwork	1.93e-06	5.42e-06	<0.01	5.71444	5.266	0.448442	PDLIM5 (4.3)	FERMT2 (3.8)	PHLDB2 (3.5)	NAV2 (3.4)	TES (3.3)	KPNA3 (3.3)	PFN1 (3.3)	RBPMS (3.2)	ITGB1 (3.2)	SYNE2 (3.1)
ENSG00000130669	PAK4 PPI subnetwork	1.98e-06	0.00253	<0.20	5.70333	2.59688	3.10646	NPM3 (4.6)	OAZ2 (3.5)	SIPA1L1 (3.3)	ENSG00000243629 (3.2)	MAP7D1 (3.2)	KLHL26 (3.0)	PDLIM5 (2.9)	DSP (2.8)	TRAK1 (2.8)	MTA3 (2.8)
ENSG00000174292	TNK1 PPI subnetwork	2.11e-06	0.00629	<0.20	5.67572	2.20135	3.47437	COL17A1 (3.7)	FNDC3B (3.6)	FHL2 (3.3)	DMRTA2 (2.6)	TRAK1 (2.6)	DLG1 (2.6)	TMEM26 (2.5)	CTDSPL (2.4)	CHRM2 (2.3)	AIM1L (2.3)
ENSG00000149257	SERPINH1 PPI subnetwork	2.27e-06	0.000187	<0.01	5.64397	3.72816	1.91582	KCTD10 (4.3)	FERMT2 (3.4)	PLEC (3.4)	CTTNBP2NL (3.3)	ITGB1 (3.1)	TXNRD1 (3.1)	CAV1 (2.9)	ADAMTSL3 (2.7)	SDPR (2.7)	SPTBN1 (2.7)
ENSG00000146648	EGFR PPI subnetwork	2.44e-06	0.00221	<0.20	5.61261	2.65561	2.957	SBNO2 (3.5)	PRKCA (3.2)	ITGAV (2.9)	LRCH1 (2.7)	CAMK2D (2.6)	SESTD1 (2.5)	PDLIM5 (2.4)	ENSG00000222872 (2.4)	SRGAP1 (2.4)	MAP3K11 (2.4)
ENSG00000133026	MYH10 PPI subnetwork	2.47e-06	4.52e-05	<0.01	5.6073	4.34486	1.26244	PFN1 (4.7)	DES (4.1)	SH3BGRL3 (3.8)	MACF1 (3.6)	MYOCD (3.6)	TES (3.5)	KCTD10 (3.4)	PLEC (3.3)	RHOA (3.2)	OXSR1 (3.1)
ENSG00000134853	PDGFRA PPI subnetwork	2.51e-06	0.03	<0.20	5.60033	1.52288	4.07745	PRRX1 (3.3)	CAV2 (3.2)	PDZRN3 (2.9)	DLG1 (2.9)	NR3C1 (2.8)	WNT11 (2.8)	NR2F1 (2.7)	FUT11 (2.7)	ZNF592 (2.6)	DLC1 (2.6)
ENSG00000138798	EGF PPI subnetwork	2.53e-06	0.05	<0.20	5.59688	1.30103	4.29585	ARHGAP24 (3.7)	FAM59A (3.4)	HLX (3.2)	SPTBN1 (3.1)	HSPG2 (3.0)	SESTD1 (2.8)	SRGAP1 (2.7)	LDB1 (2.5)	ENSG00000224080 (2.5)	EFNA1 (2.5)
ENSG00000105699	LSR PPI subnetwork	2.6e-06	0.000883	<0.05	5.58503	3.05404	2.53099	PLEC (3.8)	DSP (3.4)	MACF1 (3.4)	TRAK1 (3.1)	MARK3 (3.1)	SYNE2 (3.0)	CCDC141 (2.9)	CSNK1G1 (2.9)	SIPA1L1 (2.9)	STRN (2.9)
ENSG00000092054	MYH7 PPI subnetwork	2.61e-06	0.05	<0.20	5.58336	1.30103	4.28233	MYH7 (7.0)	TTN (6.5)	LDB3 (6.4)	MYH6 (6.3)	CEFIP (6.0)	SYNPO2L (5.9)	ENO3 (5.8)	TRDN (5.8)	XIRP1 (5.7)	OBSCN (5.4)
ENSG00000123159	GIPC1 PPI subnetwork	2.62e-06	0.00253	<0.20	5.5817	2.59688	2.98482	SCN11A (3.7)	DAG1 (3.4)	CHPF (3.3)	OBSL1 (3.3)	PODXL (3.1)	SORBS1 (3.0)	CRIM1 (3.0)	SIPA1L1 (2.9)	ITGAV (2.8)	PLEC (2.6)
ENSG00000140416	TPM1 PPI subnetwork	2.64e-06	0.00055	<0.05	5.5784	3.25964	2.31876	DES (8.4)	ENO3 (6.6)	MYOZ1 (6.5)	LDB3 (6.2)	TTN (6.2)	SYNPO2L (6.1)	MYH7 (6.0)	SRL (5.8)	TRDN (5.8)	PLN (5.5)
ENSG00000186831	ENSG00000186831 PPI subnetwork	2.7e-06	0.00501	<0.20	5.56864	2.30016	3.26847	GOPC (3.0)	ITGB1 (3.0)	PHLDB2 (2.8)	SRGAP1 (2.8)	CAV1 (2.7)	KCTD10 (2.5)	PTK2 (2.5)	FHL2 (2.5)	MYOCD (2.4)	SEC24C (2.4)
ENSG00000014216	CAPN1 PPI subnetwork	2.71e-06	0.000473	<0.05	5.56703	3.32514	2.24189	PLN (5.1)	MYH6 (4.5)	DPT (4.3)	LDB3 (4.3)	MYH7 (4.2)	SYNPO2L (4.2)	ADPRHL1 (4.2)	RYR2 (4.0)	SCN5A (4.0)	TTN (3.8)
ENSG00000008083	JARID2 PPI subnetwork	2.75e-06	0.00361	<0.20	5.56067	2.44249	3.11817	ZFPM2 (4.4)	RYR2 (3.9)	OBSL1 (3.4)	TCF21 (3.3)	CDH2 (3.2)	NKX2-5 (3.2)	SIPA1L2 (3.1)	HCN4 (3.1)	FGF12 (3.0)	MYH6 (2.9)
ENSG00000173210	ABLIM3 PPI subnetwork	2.79e-06	0.00201	<0.20	5.5544	2.6968	2.85759	FERMT2 (4.9)	FHL2 (4.8)	TES (4.4)	PHLDB2 (4.1)	KCTD10 (4.0)	DSP (3.8)	PLEC (3.7)	PDLIM5 (3.6)	ITGB1 (3.4)	SPTBN1 (3.4)
ENSG00000075618	FSCN1 PPI subnetwork	2.85e-06	0.00193	<0.20	5.54516	2.71444	2.83071	TCTA (4.2)	ENSG00000224080 (3.6)	KCTD10 (3.2)	ALPK3 (3.1)	SYNPO2L (3.1)	ENO3 (3.1)	NAV2 (3.0)	CRYAB (2.9)	SRL (2.9)	PRKAB2 (2.9)
ENSG00000105662	CRTC1 PPI subnetwork	3.02e-06	0.000907	<0.05	5.51999	3.04239	2.4776	PLEC (3.6)	TRAK1 (3.4)	MACF1 (3.4)	DSP (3.3)	SYNE2 (3.1)	DLG1 (3.0)	SIPA1L1 (2.9)	NCK2 (2.9)	CTDSPL (2.9)	MARK3 (2.9)
ENSG00000163513	TGFBR2 PPI subnetwork	3.14e-06	0.00449	<0.20	5.50307	2.34775	3.15532	SKI (5.3)	EPAS1 (3.9)	ID2 (3.8)	CALHM2 (3.5)	HSPG2 (3.4)	TMEM204 (3.3)	KCTD10 (3.2)	CRIM1 (3.0)	TCF21 (3.0)	GJA5 (3.0)
ENSG00000099250	NRP1 PPI subnetwork	3.2e-06	0.02	<0.20	5.49485	1.69897	3.79588	PODXL (5.3)	COL13A1 (4.2)	CCBE1 (4.1)	EPAS1 (3.9)	PRRX1 (3.4)	ADAMTSL3 (3.4)	SRGAP1 (3.3)	GJA1 (3.3)	CAV1 (3.3)	SEMA3A (3.3)
ENSG00000120899	PTK2B PPI subnetwork	3.62e-06	0.00123	<0.20	5.44129	2.91009	2.5312	CCK (3.5)	RYR2 (3.4)	SLC35F1 (3.2)	PLEC (3.1)	ADRB1 (3.0)	KCNIP2 (2.9)	MAPK8IP3 (2.7)	ITGB1 (2.7)	PDLIM5 (2.6)	SEPT7 (2.6)
ENSG00000172725	CORO1B PPI subnetwork	3.66e-06	0.00543	<0.20	5.43652	2.2652	3.17132	CTTNBP2NL (4.6)	FERMT2 (4.3)	CAV1 (3.9)	KCTD10 (3.9)	CRIM1 (3.2)	SPTBN1 (3.1)	TXNRD1 (2.9)	GSTM4 (2.8)	CAV2 (2.8)	CRYAB (2.7)
ENSG00000108819	ENSG00000108819 PPI subnetwork	3.79e-06	0.00117	<0.20	5.42136	2.93181	2.48955	KCTD10 (3.8)	FGF12 (3.3)	ADCY5 (3.3)	STRN (3.0)	ALPK3 (3.0)	AKAP6 (2.9)	CAPZA2 (2.8)	ENSG00000238018 (2.8)	GJA5 (2.8)	ELMO1 (2.8)
ENSG00000084207	GSTP1 PPI subnetwork	4.42e-06	0.00432	<0.20	5.35458	2.36452	2.99006	FERMT2 (3.6)	MYO1H (3.5)	KCTD10 (3.2)	GJA5 (2.8)	CHRM2 (2.7)	MYOCD (2.6)	RBPMS (2.6)	NAV2 (2.6)	MEIS1 (2.5)	CAV1 (2.5)
ENSG00000137171	KLC4 PPI subnetwork	4.71e-06	0.00274	<0.20	5.32698	2.56225	2.76473	PLEC (4.2)	MACF1 (3.4)	DSP (3.3)	SIPA1L1 (3.1)	CSNK1G1 (3.1)	TRAK1 (3.0)	DLG1 (3.0)	STRN (2.9)	PRKCZ (2.8)	SYNE2 (2.8)
ENSG00000006747	SCIN PPI subnetwork	4.75e-06	0.00294	<0.20	5.32331	2.53165	2.79165	PLEC (4.3)	FERMT2 (4.2)	SPTBN1 (4.1)	PHLDB2 (4.0)	CTTNBP2NL (3.8)	CDC42BPA (3.6)	FHL2 (3.5)	CAV1 (3.5)	MACF1 (3.5)	KCTD10 (3.4)
ENSG00000197045	GMFB PPI subnetwork	5.19e-06	0.000877	<0.05	5.28483	3.057	2.22783	KCTD10 (3.7)	FERMT2 (3.7)	CAV1 (3.4)	MYO1H (3.1)	CAV2 (2.6)	RAB3B (2.5)	TXNRD1 (2.5)	CRYAB (2.4)	SPTBN1 (2.4)	SCN11A (2.3)
ENSG00000106211	HSPB1 PPI subnetwork	5.58e-06	0.000162	<0.01	5.25337	3.79048	1.46288	KCTD10 (3.5)	RBPMS (3.1)	ITGB1 (3.0)	HN1L (2.9)	MYOCD (2.9)	GOPC (2.8)	DNPEP (2.7)	TMEM5 (2.7)	TXNRD1 (2.6)	LRIG1 (2.6)
ENSG00000198523	PLN PPI subnetwork	6.07e-06	0.00458	<0.20	5.21681	2.33913	2.87768	DES (8.0)	TRDN (6.5)	TTN (6.3)	SRL (6.1)	ENO3 (6.1)	LDB3 (6.0)	MYOZ1 (5.9)	PLN (5.8)	SYNPO2L (5.7)	MYOCD (5.6)
ENSG00000120709	FAM53C PPI subnetwork	6.29e-06	0.00262	<0.20	5.20135	2.5817	2.61965	PLEC (3.7)	MACF1 (3.4)	DSP (3.4)	TRAK1 (3.4)	NCK2 (3.1)	SYNE2 (3.1)	DLG1 (3.1)	SIPA1L1 (3.1)	MARK3 (3.0)	CTDSPL (3.0)
ENSG00000070018	LRP6 PPI subnetwork	7.44e-06	0.00865	<0.20	5.12843	2.06298	3.06544	BMPR1A (4.6)	FREM2 (3.9)	FGFR1 (3.8)	FAM171B (3.6)	MPPED2 (3.5)	PDZRN3 (3.1)	NPR3 (3.0)	FKBP7 (3.0)	NKD2 (3.0)	WNT11 (3.0)
ENSG00000049323	LTBP1 PPI subnetwork	7.46e-06	0.04	<0.20	5.12726	1.39794	3.72932	GH2 (4.1)	GJA1 (4.0)	FGFR1 (3.7)	HSPG2 (3.6)	ADAMTSL3 (3.5)	RBPMS2 (3.5)	CSH2 (3.4)	CDH2 (3.2)	EPAS1 (3.1)	ZCCHC24 (3.1)
ENSG00000128487	SPECC1 PPI subnetwork	7.71e-06	0.00296	<0.20	5.11295	2.52871	2.58424	FERMT2 (4.9)	FHL2 (4.6)	TES (4.2)	PHLDB2 (3.9)	SPTBN1 (3.8)	PLEC (3.7)	KCTD10 (3.6)	CAV1 (3.6)	DSP (3.5)	ITGB1 (3.3)
ENSG00000068615	REEP1 PPI subnetwork	8.32e-06	0.00152	<0.20	5.07988	2.81816	2.26172	PLEC (3.6)	TRAK1 (3.3)	DSP (3.3)	MACF1 (3.2)	DLG1 (3.2)	SIPA1L1 (3.1)	NCK2 (3.1)	CTDSPL (3.0)	SYNE2 (2.9)	MARK3 (2.8)
ENSG00000169398	PTK2 PPI subnetwork	8.39e-06	0.00542	<0.20	5.07624	2.266	2.81024	PLCD1 (3.3)	PLEC (3.2)	HSPG2 (3.0)	PRKCA (2.9)	ITGB1 (2.8)	EFNA1 (2.7)	CALHM2 (2.7)	PARP8 (2.7)	FHL2 (2.6)	SIPA1 (2.6)
ENSG00000163629	PTPN13 PPI subnetwork	9.2e-06	0.000241	<0.05	5.03621	3.61798	1.41823	DLG1 (3.5)	DAG1 (3.3)	PHLDB2 (2.8)	PLCD1 (2.6)	SCN11A (2.6)	PLEC (2.5)	EFNA1 (2.5)	RAP1A (2.5)	EFHA1 (2.5)	SH3PXD2A (2.5)
ENSG00000108823	SGCA PPI subnetwork	9.29e-06	0.02	<0.20	5.03198	1.69897	3.33301	AKAP6 (4.2)	SSPN (4.2)	PPAPDC3 (4.0)	DPT (3.7)	FIGN (3.7)	TMEM182 (3.7)	SYPL2 (3.5)	SYNPO2L (3.4)	BMPR1A (3.4)	CORO6 (3.4)
ENSG00000157764	BRAF PPI subnetwork	9.59e-06	0.12	<0.20	5.01818	0.920819	4.09736	MAP7D1 (3.6)	TRAK1 (3.3)	CCBE1 (3.1)	MTA3 (3.1)	CAPZA2 (2.9)	TFEB (2.9)	MINK1 (2.7)	FAM59A (2.7)	ZNF608 (2.6)	PLEC (2.5)
ENSG00000134308	YWHAQ PPI subnetwork	1.01e-05	0.03	<0.20	4.99568	1.52288	3.4728	MAP7D1 (3.2)	DSP (3.1)	FBXO11 (3.1)	RANGAP1 (3.1)	ZNF219 (3.0)	ASH1L (2.6)	MTA3 (2.6)	RBPMS (2.5)	CCDC141 (2.5)	SESTD1 (2.5)
ENSG00000100014	SPECC1L PPI subnetwork	1.07e-05	0.00322	<0.20	4.97062	2.49214	2.47847	CTTNBP2NL (4.2)	FERMT2 (3.8)	CAV1 (3.4)	CRYAB (3.1)	PLEC (3.1)	KCTD10 (2.9)	HSPG2 (2.8)	ENSG00000182873 (2.7)	ENSG00000224080 (2.7)	SPTBN1 (2.6)
ENSG00000198692	EIF1AY PPI subnetwork	1.11e-05	0.03	<0.20	4.95468	1.52288	3.4318	MYH7 (4.6)	MYOZ1 (4.5)	TTN (4.0)	SYNPO2L (3.7)	LDB3 (3.6)	TRDN (3.6)	ENO3 (3.4)	SEPT7 (3.4)	GOLGA4 (3.3)	CEFIP (3.2)
ENSG00000050405	LIMA1 PPI subnetwork	1.14e-05	0.000112	<0.01	4.9431	3.95078	0.992313	KCTD10 (3.9)	TES (3.8)	FERMT2 (3.7)	PFN1 (3.6)	MYOCD (3.6)	CKB (3.5)	CRYAB (3.5)	ITGB1 (3.5)	CAPZA2 (3.4)	SPTBN1 (3.3)
ENSG00000065882	TBC1D1 PPI subnetwork	1.23e-05	0.00181	<0.20	4.91009	2.74232	2.16777	PLEC (4.2)	MACF1 (3.2)	DSP (3.2)	SYNE2 (2.9)	DLG1 (2.9)	BTRC (2.9)	TRAK1 (2.9)	ZNF592 (2.8)	PRKCZ (2.7)	CTDSPL (2.7)
ENSG00000197879	MYO1C PPI subnetwork	1.37e-05	0.00122	<0.20	4.86328	2.91364	1.94964	MACF1 (4.6)	PFN1 (4.2)	ITGB1 (4.0)	PLEC (3.4)	SPTBN1 (3.2)	SEPT7 (3.1)	KCTD10 (3.1)	SH3BGRL3 (3.0)	SPEG (2.9)	RHOA (2.8)
ENSG00000157500	APPL1 PPI subnetwork	1.56e-05	0.03	<0.20	4.80688	1.52288	3.284	ASH1L (3.1)	SENP2 (3.0)	TMEM198 (2.9)	MAPK8IP3 (2.9)	BTRC (2.8)	DGKB (2.7)	SEPT7 (2.7)	FOXP1 (2.6)	MINK1 (2.6)	CLOCK (2.6)
ENSG00000197943	PLCG2 PPI subnetwork	1.57e-05	0.01	<0.20	4.8041	2	2.8041	CD79B (4.7)	VPREB3 (4.4)	IRF8 (4.0)	WT1-AS (3.6)	NDST2 (3.1)	SIPA1 (2.9)	ZNF592 (2.8)	RAP1A (2.8)	TMEM204 (2.6)	PRKCA (2.6)
ENSG00000166866	MYO1A PPI subnetwork	1.69e-05	0.000609	<0.05	4.77211	3.21538	1.55673	FHL2 (3.7)	CAV1 (3.3)	CRIM1 (3.3)	RBPMS (3.3)	PLEC (3.3)	CAV2 (3.2)	MACF1 (3.1)	CDKN1A (3.0)	FERMT2 (2.9)	SPTBN1 (2.9)
ENSG00000167085	PHB PPI subnetwork	1.81e-05	0.00327	<0.20	4.74232	2.48545	2.25687	NKX2-5 (3.6)	ATP6V0E1 (3.1)	SYNPO2L (2.9)	SEC24C (2.9)	QARS (2.9)	EID3 (2.8)	MYH6 (2.8)	ITGB1 (2.8)	MYH7 (2.8)	IMPDH2 (2.7)
ENSG00000135269	TES PPI subnetwork	1.82e-05	0.05	<0.20	4.73993	1.30103	3.4389	SPEG (4.5)	LIMD2 (4.2)	PDLIM5 (4.1)	TES (3.9)	MACF1 (3.8)	RBPMS (3.8)	DES (3.7)	PFN1 (3.4)	FERMT2 (3.4)	CDH2 (3.3)
ENSG00000100393	EP300 PPI subnetwork	1.86e-05	0.00699	<0.20	4.73049	2.15552	2.57496	ZNF503 (3.9)	CCNL1 (3.9)	ZMIZ1 (3.8)	SCAF11 (3.5)	CDKN1A (3.2)	ZNF609 (3.1)	CSRNP1 (3.1)	ID2 (3.1)	NFKBIA (3.1)	HLX (2.9)
ENSG00000175793	SFN PPI subnetwork	1.87e-05	0.00695	<0.20	4.72816	2.15802	2.57014	DSP (4.3)	CAV2 (4.1)	SRGAP1 (3.6)	PHLDB2 (3.6)	FAT1 (3.6)	COL17A1 (3.5)	TRAK1 (3.5)	SYNE2 (3.3)	FHL2 (3.3)	SPTBN1 (3.2)
ENSG00000077782	FGFR1 PPI subnetwork	1.88e-05	0.02	<0.20	4.72584	1.69897	3.02687	PDZRN3 (4.4)	NAV2 (3.7)	FGF18 (3.6)	WNT11 (3.4)	MSX2 (3.1)	GJA5 (2.9)	MFSD9 (2.8)	MGAT5 (2.8)	COL13A1 (2.8)	LPHN3 (2.7)
ENSG00000101331	C20orf160 PPI subnetwork	1.89e-05	0.0041	<0.20	4.72354	2.38722	2.33632	FERMT2 (4.9)	FHL2 (4.8)	TES (4.5)	PHLDB2 (4.0)	PLEC (3.8)	SPTBN1 (3.6)	CAV1 (3.6)	KCTD10 (3.5)	DSP (3.5)	ITGB1 (3.4)
ENSG00000143375	CGN PPI subnetwork	1.91e-05	0.0018	<0.20	4.71897	2.74473	1.97424	AIM1L (4.3)	DSP (4.3)	NT5C2 (3.6)	PHLDB2 (3.5)	PRKCZ (3.2)	TRAK1 (3.0)	MACF1 (3.0)	RBPMS (2.9)	FAT1 (2.9)	CTTNBP2NL (2.8)
ENSG00000145675	PIK3R1 PPI subnetwork	1.93e-05	0.01	<0.20	4.71444	2	2.71444	CD79B (3.8)	PRKCA (3.5)	MAP7D1 (3.3)	LIMD2 (3.2)	DOK2 (3.2)	FRMD4B (2.7)	SIPA1 (2.6)	TRAK1 (2.5)	VPREB3 (2.5)	MTA3 (2.5)
ENSG00000213585	VDAC1 PPI subnetwork	2e-05	0.00708	<0.20	4.69897	2.14997	2.549	ACO2 (3.5)	CYC1 (3.3)	TTN (3.0)	MOBP (3.0)	MYH6 (3.0)	SDHD (2.9)	CRYAB (2.8)	ENO3 (2.8)	OAZ2 (2.7)	PFN1 (2.7)
ENSG00000171681	ATF7IP PPI subnetwork	2.1e-05	0.00644	<0.20	4.67778	2.19111	2.48667	HSPG2 (4.9)	GH2 (4.5)	FERMT2 (3.5)	KIAA0913 (3.4)	CLK2 (3.1)	PHLDB2 (3.1)	MUC1 (3.0)	KIAA0754 (3.0)	CHPF (2.9)	FNDC3A (2.8)
ENSG00000071909	MYO3B PPI subnetwork	2.19e-05	0.00653	<0.20	4.65956	2.18509	2.47447	CTTNBP2NL (4.3)	TES (4.3)	KCTD10 (4.3)	FERMT2 (4.2)	CAV1 (3.6)	SPTBN1 (3.3)	CDC42BPA (3.3)	PHLDB2 (3.1)	FHL2 (3.1)	TXNRD1 (2.9)
ENSG00000137831	UACA PPI subnetwork	2.21e-05	0.00128	<0.20	4.65561	2.89279	1.76282	FERMT2 (3.6)	CAV1 (3.4)	KCTD10 (3.2)	CTTNBP2NL (3.2)	SPTBN1 (3.0)	PHLDB2 (2.9)	CDC42BPA (2.8)	LRRFIP2 (2.8)	TES (2.7)	COL17A1 (2.7)
ENSG00000099942	CRKL PPI subnetwork	2.31e-05	0.03	<0.20	4.63639	1.52288	3.11351	BEND5 (3.3)	ZNF592 (3.2)	DCAF7 (3.1)	ENSG00000230525 (2.7)	SEMA3D (2.7)	MEI1 (2.7)	SIPA1 (2.6)	ZMIZ1 (2.6)	EPS15 (2.5)	PAM (2.4)
ENSG00000113758	DBN1 PPI subnetwork	2.36e-05	0.000542	<0.05	4.62709	3.266	1.36109	PFN1 (4.9)	MACF1 (4.1)	ITGB1 (3.8)	RHOA (3.5)	PABPN1 (3.5)	FHL2 (3.4)	RBPMS (3.3)	FERMT2 (3.3)	KCTD10 (3.2)	SEPT7 (3.2)
ENSG00000160803	UBQLN4 PPI subnetwork	2.62e-05	0.000856	<0.05	4.5817	3.06753	1.51417	TAGLN3 (3.1)	CHPF (2.9)	P4HTM (2.9)	FKBP7 (2.9)	DALRD3 (2.8)	DERL3 (2.8)	ELAVL4 (2.7)	NDRG4 (2.6)	MUC1 (2.6)	PDZRN3 (2.5)
ENSG00000152556	PFKM PPI subnetwork	2.63e-05	0.02	<0.20	4.58004	1.69897	2.88107	OBSCN (3.8)	RCAN2 (3.6)	TRDN (3.4)	TTN (3.3)	MYH7 (3.2)	DES (3.2)	SRL (3.2)	ENO3 (3.2)	LDB3 (3.1)	CEFIP (3.0)
ENSG00000168036	CTNNB1 PPI subnetwork	2.94e-05	0.01	<0.20	4.53165	2	2.53165	MKLN1 (3.3)	ZMIZ1 (3.1)	EIF2C2 (3.1)	SSBP3 (3.0)	ST13 (2.9)	PTK2 (2.9)	SEMA3A (2.9)	PRKCA (2.8)	FAT1 (2.8)	SRGAP1 (2.7)
ENSG00000163017	ACTG2 PPI subnetwork	3.02e-05	0.0025	<0.20	4.51999	2.60206	1.91793	PFN1 (4.5)	MACF1 (4.2)	KCTD10 (3.1)	SPTBN1 (3.1)	PLEC (3.0)	MARCKS (3.0)	RHOA (2.9)	ITGB1 (2.8)	ENSG00000230627 (2.8)	SEPT7 (2.7)
ENSG00000082701	GSK3B PPI subnetwork	3.05e-05	0.00119	<0.20	4.5157	2.92445	1.59125	SKI (3.1)	PLEC (2.9)	SENP2 (2.9)	CCNL1 (2.8)	TSC22D2 (2.6)	MGEA5 (2.5)	NFIA (2.5)	KPNA3 (2.5)	MAP7D1 (2.5)	LDB1 (2.5)
ENSG00000157110	RBPMS PPI subnetwork	3.06e-05	0.06	<0.20	4.51428	1.22185	3.29243	DMRTA2 (4.6)	KIAA0913 (3.7)	ZNF358 (3.6)	ZNF219 (3.5)	RELA (3.3)	POLL (3.2)	RNF167 (2.9)	NMU (2.8)	ADCY5 (2.8)	MMP11 (2.7)
ENSG00000071127	WDR1 PPI subnetwork	3.12e-05	0.00035	<0.05	4.50585	3.45593	1.04991	PFN1 (4.1)	KCTD10 (4.0)	TES (3.4)	OSBPL9 (3.0)	ALPK3 (2.7)	RBPMS (2.7)	CAV1 (2.6)	SLC6A4 (2.6)	SPTBN1 (2.6)	FERMT2 (2.6)
ENSG00000107643	MAPK8 PPI subnetwork	3.13e-05	0.08	<0.20	4.50446	1.09691	3.40755	CSRNP1 (6.1)	NFKBIA (4.4)	CCNL1 (3.9)	CDKN1A (3.9)	ID2 (3.3)	RAP2B (3.2)	RELA (3.1)	CAMK2D (2.7)	MARCKS (2.7)	RASEF (2.6)
ENSG00000125753	VASP PPI subnetwork	3.14e-05	0.00112	<0.20	4.50307	2.95078	1.55229	TES (3.6)	PDLIM5 (3.5)	SH3BGRL3 (3.4)	LIMD2 (3.3)	SPEG (3.3)	ENSG00000230627 (3.0)	KIAA0754 (3.0)	DOK2 (2.9)	DES (2.8)	PLN (2.7)
ENSG00000102882	MAPK3 PPI subnetwork	3.25e-05	0.08	<0.20	4.48812	1.09691	3.39121	CSRNP1 (3.7)	MAPK8IP3 (3.2)	SBNO2 (3.2)	ZMIZ1 (3.1)	SCN10A (3.0)	NEURL (3.0)	KCNIP2 (2.9)	SSH2 (2.9)	MINK1 (2.9)	GRINA (2.8)
ENSG00000041982	TNC PPI subnetwork	3.3e-05	0.000911	<0.05	4.48149	3.04048	1.441	TMEM204 (4.5)	PHLDB2 (4.2)	CAV2 (4.0)	CAV1 (3.6)	RBPMS (3.6)	PDLIM5 (3.5)	EPAS1 (3.5)	HSPG2 (3.5)	LPHN3 (3.4)	TES (3.3)
ENSG00000177731	FLII PPI subnetwork	3.48e-05	0.00129	<0.20	4.45842	2.88941	1.56901	KCTD10 (4.4)	OAZ2 (3.4)	FERMT2 (3.2)	ENSG00000224080 (3.1)	RBPMS (3.1)	OXSR1 (3.0)	TXNRD1 (2.8)	KPNA3 (2.7)	FGF5 (2.7)	SPTBN1 (2.6)
ENSG00000164171	ITGA2 PPI subnetwork	3.48e-05	0.02	<0.20	4.45842	1.69897	2.75945	RYR2 (3.7)	HSPG2 (3.6)	FHL2 (3.5)	MYH6 (3.3)	SLC27A6 (3.2)	GJA1 (3.2)	SEC11A (3.0)	DSP (3.0)	ESR2 (2.9)	PDE3A (2.8)
ENSG00000161202	DVL3 PPI subnetwork	3.49e-05	0.08	<0.20	4.45717	1.09691	3.36026	TLE3 (4.3)	TRIM32 (3.3)	DLG1 (3.0)	ACVR2B (2.9)	ZNF503 (2.9)	SKI (2.8)	ZNF219 (2.6)	ITGA9 (2.5)	DAG1 (2.5)	NKD2 (2.5)
ENSG00000174718	C12orf35 PPI subnetwork	3.51e-05	0.00144	<0.20	4.45469	2.84164	1.61306	APOH (4.5)	MYH6 (3.4)	SLC6A4 (3.1)	RYR2 (2.8)	CHRM2 (2.7)	KIAA1755 (2.7)	CTDSPL (2.6)	GP1BA (2.6)	FLRT2 (2.6)	ENSG00000249700 (2.5)
ENSG00000109814	UGDH PPI subnetwork	3.52e-05	0.00456	<0.20	4.45346	2.34104	2.11242	KCTD10 (4.3)	FERMT2 (3.5)	CTTNBP2NL (3.1)	MYO1H (3.1)	TXNRD1 (2.8)	CRYAB (2.8)	SPTBN1 (2.8)	PHLDB2 (2.8)	CAV1 (2.8)	FGF5 (2.7)
ENSG00000078399	HOXA9 PPI subnetwork	3.52e-05	0.01	<0.20	4.45346	2	2.45346	MEIS1 (5.3)	CSRNP1 (3.9)	RIC8B (3.8)	MPPED2 (3.6)	FIGN (3.3)	NR2F1 (3.3)	DMRTA2 (3.2)	CCNL1 (3.1)	BMPR1A (3.0)	ACCN4 (2.8)
ENSG00000115306	SPTBN1 PPI subnetwork	3.56e-05	0.00305	<0.20	4.44855	2.5157	1.93285	SPTBN1 (3.5)	CAPZA2 (3.4)	ZC3H7B (3.2)	CDC42BPA (3.0)	PFN1 (2.9)	RHOA (2.8)	FOXP1 (2.8)	MGEA5 (2.7)	SIPA1L1 (2.7)	SPEG (2.6)
ENSG00000039560	RAI14 PPI subnetwork	3.74e-05	0.0013	<0.20	4.42713	2.88606	1.54107	KCTD10 (4.7)	CAV1 (3.8)	FERMT2 (3.6)	CRYAB (3.5)	SPTBN1 (3.4)	CTTNBP2NL (3.1)	MAP7D1 (3.1)	COL17A1 (2.8)	ALPK3 (2.5)	TES (2.4)
ENSG00000113196	HAND1 PPI subnetwork	3.79e-05	0.07	<0.20	4.42136	1.1549	3.26646	ENSG00000237125 (6.5)	PITX3 (4.4)	PRRX1 (4.3)	TBX20 (4.1)	MPPED2 (4.1)	ZNF358 (3.8)	TMEM26 (3.5)	CEFIP (3.3)	FKBP7 (3.1)	PPAPDC3 (3.0)
ENSG00000011405	PIK3C2A PPI subnetwork	3.85e-05	0.00353	<0.20	4.41454	2.45223	1.96231	SYNPO2L (4.7)	MYH6 (4.6)	MYH7 (4.0)	PDLIM5 (3.7)	LRRFIP2 (3.7)	CORO6 (3.3)	SRL (3.3)	NKX2-5 (3.3)	ADPRHL1 (3.1)	TTN (3.1)
ENSG00000164107	HAND2 PPI subnetwork	3.86e-05	0.07	<0.20	4.41341	1.1549	3.25851	ENSG00000237125 (7.9)	TBX20 (4.8)	ZNF358 (4.3)	ZFPM1 (4.3)	NKX2-5 (4.1)	SLC27A6 (3.6)	MPPED2 (3.3)	OBSL1 (3.3)	CDH2 (3.3)	MYOCD (3.1)
ENSG00000112851	ERBB2IP PPI subnetwork	3.87e-05	0.000877	<0.05	4.41229	3.057	1.35529	FAM59A (4.5)	COL17A1 (3.6)	EFNA1 (3.5)	ID2 (3.3)	ZC3H7B (3.1)	DSP (3.0)	MGEA5 (2.9)	FAT1 (2.8)	FAM171B (2.5)	MET (2.5)
ENSG00000167193	CRK PPI subnetwork	3.87e-05	0.00213	<0.20	4.41229	2.67162	1.74067	TSC22D2 (3.7)	MTA3 (3.4)	C6orf195 (3.3)	PRKCA (3.0)	CHD6 (2.8)	MSX2 (2.8)	ZNF592 (2.7)	LDB1 (2.7)	SPTBN1 (2.6)	TRAK1 (2.6)
ENSG00000070182	SPTB PPI subnetwork	3.96e-05	0.04	<0.20	4.4023	1.39794	3.00436	XPO7 (5.3)	MYH6 (4.4)	ADPRHL1 (4.2)	MYH7 (4.1)	TBX20 (4.0)	NKX2-5 (4.0)	FGF12 (3.8)	SYNPO2L (3.8)	AKAP6 (3.7)	SPTBN1 (3.6)
ENSG00000072518	MARK2 PPI subnetwork	4e-05	0.00702	<0.20	4.39794	2.15366	2.24428	TFEB (3.3)	MINK1 (2.9)	ENSG00000243629 (2.9)	ZFPM1 (2.8)	CAPZA2 (2.8)	C1orf183 (2.8)	SIPA1L1 (2.7)	RAP2B (2.7)	MAP7D1 (2.6)	SHARPIN (2.6)
ENSG00000172757	CFL1 PPI subnetwork	4.04e-05	2.93e-05	<0.01	4.39362	4.53313	-0.139514	PFN1 (4.9)	KCTD10 (4.8)	TES (4.1)	FHL2 (4.1)	CAPZA2 (4.0)	RHOA (3.8)	GNAI3 (3.7)	PDLIM5 (3.5)	DES (3.2)	ITGB1 (3.2)
ENSG00000134215	VAV3 PPI subnetwork	4.15e-05	0.03	<0.20	4.38195	1.52288	2.85907	KCTD10 (3.3)	SLCO4C1 (3.0)	MACF1 (3.0)	SESTD1 (3.0)	CHD6 (2.9)	CTTNBP2NL (2.9)	MAP3K11 (2.8)	CTDSPL (2.6)	ENSG00000259134 (2.6)	OAZ2 (2.6)
ENSG00000198373	WWP2 PPI subnetwork	4.18e-05	0.01	<0.20	4.37882	2	2.37882	MARCKS (3.4)	KIAA0913 (3.3)	GRINA (3.1)	TFEB (3.1)	BMP8A (2.6)	SIPA1L2 (2.6)	IRX3 (2.6)	SSBP3 (2.6)	CBX8 (2.6)	ZNF358 (2.6)
ENSG00000075624	ACTB PPI subnetwork	4.28e-05	0.00837	<0.20	4.36856	2.07727	2.29128	RHOA (4.5)	PFN1 (4.4)	SEPT7 (3.3)	TES (3.0)	SH3BGRL3 (3.0)	CAPZA2 (2.9)	GNAI3 (2.8)	ITGB1 (2.8)	MGEA5 (2.8)	SDPR (2.8)
ENSG00000170421	KRT8 PPI subnetwork	4.38e-05	0.00566	<0.20	4.35853	2.24718	2.11134	MACF1 (5.0)	PLEC (4.5)	SPTBN1 (4.3)	CAV2 (3.8)	CAV1 (3.7)	CRYAB (3.3)	CDKN1A (3.1)	KIAA0754 (3.1)	KCTD10 (3.1)	CDC42BPA (3.0)
ENSG00000215699	ENSG00000215699 PPI subnetwork	4.85e-05	0.000335	<0.05	4.31426	3.47496	0.839303	CAV1 (3.7)	FERMT2 (3.6)	KCTD10 (3.6)	CTTNBP2NL (3.5)	CRYAB (3.4)	TXNRD1 (2.6)	SPTBN1 (2.5)	OAZ2 (2.5)	CAV2 (2.4)	TES (2.4)
ENSG00000100030	MAPK1 PPI subnetwork	4.88e-05	0.09	<0.20	4.31158	1.04576	3.26582	CSRNP1 (4.9)	NFKBIA (3.5)	SSH2 (3.5)	CDKN1A (3.3)	MAP3K11 (3.2)	PLEC (3.1)	CCNL1 (3.0)	DAG1 (2.9)	MAP7D1 (2.8)	NEURL (2.6)
ENSG00000134333	LDHA PPI subnetwork	4.99e-05	0.00516	<0.20	4.3019	2.28735	2.01455	MOBP (4.9)	CMTM5 (3.9)	RCAN2 (3.6)	GJA1 (3.5)	CKB (3.3)	SPATA20 (3.0)	ID2 (2.9)	NDRG4 (2.9)	CDC42BPA (2.8)	CAMK2G (2.8)
ENSG00000196586	MYO6 PPI subnetwork	5.1e-05	0.000147	<0.01	4.29243	3.83268	0.459747	ALPK3 (3.4)	KCTD10 (3.3)	AIM1L (3.2)	UBE3B (3.0)	SRL (2.9)	SPTBN1 (2.8)	MYOZ1 (2.8)	LDB3 (2.8)	ENO3 (2.8)	SYNPO2L (2.7)
ENSG00000173511	VEGFB PPI subnetwork	5.15e-05	0.04	<0.20	4.28819	1.39794	2.89025	SCAND2 (4.2)	TMEM204 (3.7)	HSPG2 (3.7)	EFNA1 (3.4)	MTUS1 (3.3)	HLX (3.0)	ARHGAP24 (2.7)	EPAS1 (2.5)	GJA5 (2.4)	ENSG00000237887 (2.4)
ENSG00000113721	PDGFRB PPI subnetwork	5.2e-05	0.07	<0.20	4.284	1.1549	3.12909	PRRX1 (3.0)	DLG1 (2.8)	PDZRN3 (2.8)	NR3C1 (2.6)	FNDC3A (2.6)	GJA5 (2.5)	WNT11 (2.5)	PARP8 (2.5)	NR2F1 (2.4)	LRCH1 (2.4)
ENSG00000198898	CAPZA2 PPI subnetwork	5.37e-05	0.00845	<0.20	4.27003	2.07314	2.19688	RHOA (4.7)	PFN1 (4.7)	ACO2 (3.7)	SPTBN1 (3.1)	MACF1 (3.0)	PABPN1 (3.0)	SEPT7 (3.0)	GOT2 (2.9)	ADPRHL1 (2.9)	CYC1 (2.7)
ENSG00000159840	ZYX PPI subnetwork	5.66e-05	0.00254	<0.20	4.24718	2.59517	1.65202	PDLIM5 (4.4)	ITGAV (3.7)	RBPMS (3.2)	GOPC (3.2)	ITGA9 (3.1)	MACF1 (2.9)	DSP (2.9)	SESTD1 (2.8)	CACNA1D (2.7)	OSBPL9 (2.7)
ENSG00000151276	MAGI1 PPI subnetwork	5.72e-05	0.03	<0.20	4.2426	1.52288	2.71973	LRRFIP2 (3.3)	SIPA1L1 (3.3)	ZNF358 (3.1)	SESTD1 (2.9)	NAV2 (2.9)	GNAI3 (2.9)	ENSG00000224080 (2.8)	EFNA1 (2.7)	FGF8 (2.7)	ITGAV (2.7)
ENSG00000018408	WWTR1 PPI subnetwork	6.01e-05	0.0046	<0.20	4.22113	2.33724	1.88388	GJA5 (4.6)	NKX2-5 (3.7)	IRX3 (3.4)	ADPRHL1 (3.2)	MLNR (3.2)	CRLF1 (3.1)	SH3PXD2A (3.0)	MUC1 (3.0)	LAMB2 (2.8)	OBSL1 (2.7)
ENSG00000136068	FLNB PPI subnetwork	6.08e-05	0.00587	<0.20	4.2161	2.23136	1.98473	CAV2 (5.2)	PLEC (4.1)	NCK2 (3.8)	FHL2 (3.6)	FERMT2 (3.4)	MET (3.3)	RAP2B (3.3)	MACF1 (3.2)	SDPR (3.2)	SPTBN1 (3.2)
ENSG00000151422	FER PPI subnetwork	6.1e-05	0.000321	<0.05	4.21467	3.49349	0.721175	FNDC3B (4.4)	ITGAV (3.9)	CTDSPL (3.0)	EPS15 (3.0)	DLG1 (3.0)	QRICH1 (2.8)	ITGB1 (2.7)	TSC22D2 (2.6)	MET (2.5)	CAV2 (2.4)
ENSG00000105329	TGFB1 PPI subnetwork	6.1e-05	0.00432	<0.20	4.21467	2.36452	1.85015	TMEM204 (5.0)	HSPG2 (4.2)	CRLF1 (3.9)	FKBP7 (3.9)	WNT11 (3.9)	GJA1 (3.8)	MMP11 (3.7)	LAMB2 (3.5)	DPT (3.4)	FERMT2 (3.4)
ENSG00000189043	NDUFA4 PPI subnetwork	6.25e-05	0.04	<0.20	4.20412	1.39794	2.80618	ACO2 (6.6)	CYC1 (6.2)	CHCHD10 (5.8)	TIMM8B (5.4)	SDHD (5.4)	CHCHD1 (4.8)	PPARGC1A (4.6)	SLC25A11 (3.9)	XIRP1 (3.9)	MYH6 (3.8)
ENSG00000164924	YWHAZ PPI subnetwork	6.38e-05	0.0018	<0.20	4.19518	2.74473	1.45045	PLEC (4.1)	RANGAP1 (3.7)	SPTBN1 (3.5)	RHOA (3.2)	TXNRD1 (3.2)	ITGB1 (3.2)	XRCC6 (3.0)	CNOT1 (3.0)	GBF1 (3.0)	ST13 (2.9)
ENSG00000044115	CTNNA1 PPI subnetwork	6.38e-05	0.01	<0.20	4.19518	2	2.19518	SUN1 (4.2)	PHLDB2 (4.2)	ITGB1 (4.1)	PTK2 (3.5)	DSP (3.5)	SYNE2 (3.5)	MACF1 (3.3)	ST13 (3.2)	PDLIM5 (3.2)	ITGAV (3.1)
ENSG00000178209	PLEC PPI subnetwork	6.41e-05	0.04	<0.20	4.19314	1.39794	2.7952	SPTBN1 (4.7)	PLEC (4.5)	MACF1 (4.2)	CAV1 (3.9)	KCTD10 (3.6)	ENSG00000223960 (3.1)	DSP (3.0)	CAV2 (3.0)	SH3BGRL3 (2.9)	C5orf30 (2.8)
ENSG00000163466	ARPC2 PPI subnetwork	6.59e-05	0.00391	<0.20	4.18111	2.40782	1.77329	OSBPL9 (3.8)	GBF1 (3.7)	CDC42BPA (3.6)	SH3BGRL3 (3.6)	PFN1 (3.5)	MINK1 (3.2)	RHOA (3.2)	TES (3.1)	PHLDB2 (3.1)	FHL2 (3.0)
ENSG00000197818	SLC9A8 PPI subnetwork	6.79e-05	0.000974	<0.05	4.16813	3.01144	1.15669	APOH (6.4)	RYR2 (3.2)	MYH6 (3.1)	SLC38A7 (3.0)	FMO5 (2.7)	SLC6A4 (2.7)	ENSG00000249700 (2.6)	ESR2 (2.6)	USP28 (2.3)	CMTM5 (2.3)
ENSG00000161638	ITGA5 PPI subnetwork	6.86e-05	0.03	<0.20	4.16368	1.52288	2.6408	GJA5 (4.7)	HSPG2 (4.1)	RBPMS2 (3.6)	FERMT2 (3.2)	MMP11 (3.1)	NAV2 (3.0)	OBSL1 (2.9)	DAG1 (2.9)	FGFR1 (2.8)	PRRX1 (2.7)
ENSG00000057294	PKP2 PPI subnetwork	6.91e-05	0.00474	<0.20	4.16052	2.32422	1.8363	DSP (7.9)	COL17A1 (4.0)	SCN5A (3.4)	OBSL1 (2.9)	C11orf9 (2.9)	PRKCZ (2.8)	CYP39A1 (2.8)	TES (2.7)	NKX2-5 (2.7)	IP6K2 (2.7)
ENSG00000196411	EPHB4 PPI subnetwork	7.05e-05	0.00266	<0.20	4.15181	2.57512	1.57669	TSC22D2 (3.5)	OPLAH (2.9)	ZNF503-AS1 (2.8)	PDLIM5 (2.5)	CDC42BPA (2.5)	SEMA3A (2.4)	COL17A1 (2.4)	FHL2 (2.4)	CYC1 (2.4)	KIAA0754 (2.3)
ENSG00000130176	CNN1 PPI subnetwork	7.12e-05	0.02	<0.20	4.14752	1.69897	2.44855	DES (5.1)	MYH7 (4.9)	MYOZ1 (4.7)	TTN (4.4)	SRL (4.3)	TRDN (4.3)	ENO3 (4.2)	SYNPO2L (4.0)	LDB3 (4.0)	MYH6 (3.6)
ENSG00000010803	SCMH1 PPI subnetwork	7.28e-05	0.00976	<0.20	4.13787	2.01055	2.12732	HPS6 (3.9)	ZNF219 (3.7)	TOB2 (3.5)	LDB1 (3.4)	ARID2 (3.2)	FBXO11 (3.1)	TFAP4 (3.1)	ZNF358 (3.0)	MARK3 (2.9)	MUC1 (2.8)
ENSG00000186111	PIP5K1C PPI subnetwork	7.44e-05	0.000321	<0.05	4.12843	3.49349	0.634932	PFN1 (4.6)	PDLIM5 (3.8)	CRYAB (3.3)	FHL2 (3.3)	PLEC (3.1)	ITGB1 (3.1)	MACF1 (3.1)	SORBS1 (2.9)	PABPN1 (2.9)	SPEG (2.9)
ENSG00000136352	NKX2-1 PPI subnetwork	7.95e-05	0.03	<0.20	4.09963	1.52288	2.57675	ZFPM2 (3.3)	SYNE2 (3.1)	ENSG00000237887 (2.8)	MAP3K11 (2.7)	ZMIZ1 (2.7)	ZNF592 (2.6)	ASH1L (2.6)	EIF2C2 (2.6)	FGF18 (2.5)	EP300 (2.5)
ENSG00000150867	PIP4K2A PPI subnetwork	7.96e-05	0.04	<0.20	4.09909	1.39794	2.70115	PDLIM5 (3.9)	SEPT7 (3.8)	ITGB1 (3.5)	CAMK2G (3.3)	DES (2.9)	LRRFIP2 (2.8)	ADCY5 (2.7)	KCTD10 (2.7)	SIPA1L1 (2.7)	SORBS1 (2.7)
ENSG00000134184	GSTM1 PPI subnetwork	8.85e-05	0.00637	<0.20	4.05306	2.19586	1.8572	FERMT2 (3.8)	CAV1 (3.7)	KCTD10 (3.6)	TES (3.5)	PLEC (3.4)	SPTBN1 (3.4)	CTTNBP2NL (3.4)	CDC42BPA (3.2)	FHL2 (3.2)	PHLDB2 (3.1)
ENSG00000155657	TTN PPI subnetwork	8.93e-05	0.000581	<0.05	4.04915	3.23582	0.813325	TRDN (10.7)	TTN (10.0)	MYOZ1 (9.8)	LDB3 (9.2)	ENO3 (9.0)	SRL (8.9)	MYH7 (8.7)	CEFIP (8.3)	XIRP1 (8.0)	SYNPO2L (8.0)
ENSG00000078328	RBFOX1 PPI subnetwork	9.34e-05	0.04	<0.20	4.02965	1.39794	2.63171	OBSL1 (3.4)	ANKRD13B (3.3)	KIAA0913 (3.2)	TRIM32 (2.9)	LDB1 (2.9)	MAP7D1 (2.8)	ARHGEF40 (2.8)	YY1AP1 (2.7)	ZNF358 (2.6)	TMTC2 (2.6)
ENSG00000100697	DICER1 PPI subnetwork	9.47e-05	0.00681	<0.20	4.02365	2.16685	1.8568	MYH6 (4.1)	CCDC141 (3.5)	EID3 (3.3)	XIRP1 (3.2)	NKX2-5 (3.1)	HDGFL1 (3.0)	TMEM5 (3.0)	HCN4 (2.9)	ALPK3 (2.8)	OBSCN (2.7)
ENSG00000148498	PARD3 PPI subnetwork	9.53e-05	0.03	<0.20	4.02091	1.52288	2.49803	CTTNBP2NL (3.8)	PRKCZ (3.7)	FAM59A (3.4)	TRAK1 (3.2)	CTDSPL (3.1)	FAT1 (3.0)	AIM1L (3.0)	DSP (2.9)	FGFR2 (2.9)	DAG1 (2.8)
ENSG00000165197	FIGF PPI subnetwork	9.56e-05	0.03	<0.20	4.01954	1.52288	2.49666	TMEM204 (3.6)	HLX (3.6)	EFNA1 (3.5)	MTUS1 (3.3)	SCAND2 (3.2)	HSPG2 (3.1)	ARHGAP24 (2.8)	GJA5 (2.7)	ENSG00000237887 (2.7)	BPI (2.6)
ENSG00000177189	RPS6KA3 PPI subnetwork	0.000102	0.00452	<0.20	3.9914	2.34486	1.64654	BSN (3.8)	CCK (3.5)	TMEM198 (3.5)	NEURL (3.4)	KCNIP2 (3.3)	CDC42BPA (3.3)	SLC35F1 (3.2)	TMEM59L (2.9)	FGF14 (2.9)	DGKB (2.8)
ENSG00000171992	SYNPO PPI subnetwork	0.000104	0.000862	<0.05	3.98297	3.06449	0.918474	PLEC (4.3)	CAV1 (3.6)	TES (3.4)	FERMT2 (3.4)	SPTBN1 (3.4)	CDC42BPA (3.4)	MACF1 (3.1)	CTTNBP2NL (3.1)	ENSG00000224080 (3.1)	LRRFIP2 (3.0)
ENSG00000175029	CTBP2 PPI subnetwork	0.000105	0.00173	<0.20	3.97881	2.76195	1.21686	FBXW4 (3.5)	PABPN1 (3.3)	LDB1 (3.2)	ZNF219 (3.1)	TOB2 (2.8)	NFIA (2.7)	TSC22D2 (2.6)	PDZRN3 (2.6)	ZNF358 (2.6)	C10orf32 (2.6)
ENSG00000165410	CFL2 PPI subnetwork	0.00011	0.00102	<0.20	3.95861	2.9914	0.967207	KCTD10 (5.0)	CTTNBP2NL (3.9)	TXNRD1 (2.9)	FERMT2 (2.8)	AIM1L (2.7)	TCTA (2.6)	CDC42BPA (2.6)	PHLDB2 (2.6)	CORO6 (2.6)	CAV1 (2.6)
ENSG00000154229	PRKCA PPI subnetwork	0.00011	0.01	<0.20	3.95861	2	1.95861	DGKB (3.6)	PDLIM5 (3.4)	SUN1 (3.3)	DTNA (3.2)	ADRB1 (3.1)	MACF1 (3.0)	RBPMS (3.0)	RYR2 (3.0)	DES (3.0)	FGF14 (3.0)
ENSG00000140564	FURIN PPI subnetwork	0.000118	0.00649	<0.20	3.92812	2.18776	1.74036	CACNA1G (3.2)	HSPG2 (3.1)	SLC35F1 (2.6)	OPN4 (2.6)	BRD7P3 (2.5)	DNAH11 (2.5)	ARHGEF40 (2.4)	PLEC (2.4)	GJC2 (2.3)	ENSG00000237013 (2.3)
ENSG00000049618	ARID1B PPI subnetwork	0.000119	0.00241	<0.20	3.92445	2.61798	1.30647	GBF1 (4.1)	ZC3H7B (3.9)	SSBP3 (3.7)	KIAA0913 (3.6)	EP300 (3.5)	ZNF592 (3.5)	RELA (3.3)	GRINA (3.1)	ZNF609 (3.1)	ZNF608 (3.0)
ENSG00000187079	TEAD1 PPI subnetwork	0.00012	0.0018	<0.20	3.92082	2.74473	1.17609	SYNPO2L (4.6)	SRL (3.5)	CEFIP (3.4)	TTN (3.4)	TMEM182 (3.3)	PPAPDC3 (3.3)	PDLIM5 (3.2)	ADPRHL1 (3.2)	XIRP1 (3.2)	MYOZ1 (3.2)
ENSG00000152256	PDK1 PPI subnetwork	0.00012	0.00195	<0.20	3.92082	2.70997	1.21085	DLAT (4.9)	SDHD (4.9)	ACO2 (4.4)	USP28 (3.9)	TACO1 (3.8)	CYC1 (3.5)	CHCHD10 (3.5)	ADCK3 (3.1)	TRAK1 (3.0)	CAV2 (2.8)
ENSG00000181856	SLC2A4 PPI subnetwork	0.000121	0.32	<0.20	3.91721	0.49485	3.42236	CAMK2G (3.5)	LINC00477 (3.1)	NME3 (2.8)	FBXW8 (2.7)	STK11 (2.6)	CHRM2 (2.5)	RIC8B (2.5)	SLC50A1 (2.4)	PDLIM5 (2.4)	CAV2 (2.4)
ENSG00000111640	GAPDH PPI subnetwork	0.000124	0.00731	<0.20	3.90658	2.13608	1.7705	TXNRD1 (3.3)	SEPT7 (3.2)	GNAI3 (3.1)	CRYAB (3.0)	PFN1 (2.9)	NRD1 (2.9)	MACF1 (2.8)	OSBPL9 (2.8)	ST13 (2.8)	NCKIPSD (2.8)
ENSG00000106028	SSBP1 PPI subnetwork	0.000127	0.00704	<0.20	3.8962	2.15243	1.74377	KCTD10 (5.1)	FERMT2 (3.4)	CAV1 (3.4)	PPP2R1B (3.3)	CTTNBP2NL (3.2)	TXNRD1 (2.9)	ALPK3 (2.8)	SDPR (2.8)	RBPMS2 (2.7)	SPTBN1 (2.6)
ENSG00000108953	YWHAE PPI subnetwork	0.000136	0.00498	<0.20	3.86646	2.30277	1.56369	PFN1 (2.9)	EIF2C2 (2.9)	CCDC141 (2.7)	NKX2-5 (2.6)	SPTBN1 (2.5)	PPIB (2.5)	SENP2 (2.5)	TSC22D2 (2.5)	ARF1 (2.5)	OBSL1 (2.4)
ENSG00000005022	SLC25A5 PPI subnetwork	0.000144	0.04	<0.20	3.84164	1.39794	2.4437	CYC1 (4.8)	GOT2 (4.3)	ACO2 (3.8)	DAP3 (3.8)	QARS (3.5)	PFN1 (3.2)	ADPRHL1 (3.1)	PSMA5 (2.8)	PPARGC1A (2.7)	IMPDH2 (2.7)
ENSG00000169641	LUZP1 PPI subnetwork	0.000149	0.00853	<0.20	3.82681	2.06905	1.75776	FERMT2 (4.3)	FHL2 (4.1)	TES (4.1)	KCTD10 (3.9)	PHLDB2 (3.7)	PLEC (3.6)	CAV1 (3.5)	CTTNBP2NL (3.5)	DSP (3.5)	SPTBN1 (3.5)
ENSG00000183943	PRKX PPI subnetwork	0.000156	0.00543	<0.20	3.80688	2.2652	1.54168	DES (4.7)	KCNIP2 (4.2)	OBSCN (4.2)	SPEG (4.2)	LDB3 (4.2)	MYOCD (4.0)	CACNA1G (3.8)	SRL (3.7)	KCND3 (3.6)	BSN (3.5)
ENSG00000198910	L1CAM PPI subnetwork	0.000157	0.01	<0.20	3.8041	2	1.8041	SLC35F1 (3.9)	CCK (3.4)	SAMD8 (3.3)	ZFPM2 (3.0)	RYR2 (2.9)	MAPK8IP3 (2.9)	TEF (2.8)	SEPT7 (2.8)	CAPZA2 (2.7)	C11orf9 (2.7)
ENSG00000110880	CORO1C PPI subnetwork	0.00016	0.00493	<0.20	3.79588	2.30715	1.48873	PLEC (4.3)	SPTBN1 (4.1)	CAV1 (3.9)	CDC42BPA (3.7)	FERMT2 (3.5)	TES (3.3)	PHLDB2 (3.2)	HSPG2 (3.2)	MACF1 (3.1)	ITGB1 (2.9)
ENSG00000170027	YWHAG PPI subnetwork	0.000178	0.00436	<0.20	3.74958	2.36051	1.38907	SPTBN1 (4.3)	MACF1 (3.7)	CHD6 (3.6)	PABPN1 (3.5)	MGEA5 (3.3)	ASH1L (3.1)	CCNL1 (3.1)	RHOA (3.0)	PTK2 (2.9)	SYNE2 (2.9)
ENSG00000117676	RPS6KA1 PPI subnetwork	0.00018	0.00663	<0.20	3.74473	2.17849	1.56624	CSRNP1 (6.2)	CCNL1 (4.7)	TOB2 (4.2)	TSC22D2 (3.6)	NFKBIA (2.8)	EIF2C2 (2.7)	ZC3H7B (2.7)	IBA57 (2.5)	FGF14 (2.4)	EP300 (2.3)
ENSG00000117450	PRDX1 PPI subnetwork	0.000188	0.02	<0.20	3.72584	1.69897	2.02687	FHL2 (4.1)	PFN1 (3.9)	GOT2 (3.5)	SH3BGRL3 (3.2)	TES (3.2)	RBPMS (3.2)	OSBPL9 (3.1)	DNPEP (2.9)	RHOA (2.9)	ENSG00000225399 (2.8)
ENSG00000106991	ENG PPI subnetwork	0.000191	0.00125	<0.20	3.71897	2.90309	0.815877	TMEM204 (4.0)	CRIM1 (3.9)	PRKAB2 (3.7)	EPAS1 (3.5)	GJA5 (3.4)	SKI (3.4)	ITGAV (3.4)	PHLDB2 (3.2)	WNT11 (3.1)	CTTNBP2NL (3.0)
ENSG00000100767	PAPLN PPI subnetwork	0.000194	0.00142	<0.20	3.7122	2.84771	0.864487	ZNF503 (3.8)	ENSG00000251582 (3.5)	CAMK2G (3.3)	FUT11 (3.3)	UNKL (2.9)	FBXW4 (2.7)	SAMD8 (2.6)	IRF8 (2.5)	MYOZ1 (2.5)	CRIM1 (2.4)
ENSG00000146950	SHROOM2 PPI subnetwork	0.000195	0.00855	<0.20	3.70997	2.06803	1.64193	PLEC (3.8)	MACF1 (3.3)	TRAK1 (3.0)	IP6K2 (2.9)	GOLGA4 (2.8)	AFF1 (2.8)	CCDC141 (2.8)	C11orf9 (2.8)	MARK3 (2.7)	OXSR1 (2.7)
ENSG00000083093	PALB2 PPI subnetwork	0.000203	0.00236	<0.20	3.6925	2.62709	1.06542	APOH (6.5)	RYR2 (3.2)	MYH6 (3.2)	ENSG00000249700 (3.1)	SLC38A7 (2.9)	ESR2 (2.8)	CDH2 (2.4)	FMO5 (2.4)	CMTM5 (2.4)	KIAA1755 (2.4)
ENSG00000118680	MYL12B PPI subnetwork	0.000208	0.00765	<0.20	3.68194	2.11634	1.5656	OSBPL9 (3.8)	CAPZA2 (3.4)	KPNA3-IT1 (3.4)	CDC42BPA (3.3)	ENSG00000243629 (3.2)	RHOA (3.0)	PFN1 (3.0)	EPS15 (2.9)	CAB39L (2.7)	CAMK2G (2.7)
ENSG00000050820	BCAR1 PPI subnetwork	0.000209	0.000484	<0.05	3.67985	3.31515	0.364699	FGFR1 (3.3)	FAT1 (3.1)	FRMD4B (3.0)	MACF1 (2.9)	PLEC (2.9)	DAG1 (2.8)	MTA3 (2.8)	FERMT2 (2.8)	PLCD1 (2.7)	DSP (2.7)
ENSG00000151320	AKAP6 PPI subnetwork	0.00021	0.00312	<0.20	3.67778	2.50585	1.17194	SCN5A (3.8)	ARIH2 (3.6)	SKI (3.2)	RAP2B (3.1)	PPAPDC3 (3.0)	FUT11 (2.9)	TFEC (2.7)	ADRB1 (2.5)	SLC8A1 (2.5)	ZCCHC24 (2.4)
ENSG00000170624	SGCD PPI subnetwork	0.000211	0.02	<0.20	3.67572	1.69897	1.97675	DES (4.7)	SYNPO2L (4.3)	XIRP1 (4.3)	DUSP13 (4.2)	AKAP6 (4.2)	PRKAB2 (4.1)	LDB3 (4.1)	CORO6 (3.9)	SSPN (3.9)	BMPR1A (3.9)
ENSG00000128245	YWHAH PPI subnetwork	0.000218	0.00897	<0.20	3.66154	2.04721	1.61434	TRAK1 (3.1)	SPTBN1 (3.1)	SYNE2 (2.9)	ASH1L (2.9)	TSC22D2 (2.9)	RAB3B (2.9)	MTA3 (2.7)	MCM9 (2.7)	TAGLN3 (2.6)	ASTN2 (2.6)
ENSG00000165702	GFI1B PPI subnetwork	0.000226	0.06	<0.20	3.64589	1.22185	2.42404	LAMB2 (4.3)	ZNF358 (3.8)	ANKRD13B (3.4)	ZNF219 (3.1)	NCKIPSD (3.1)	HSPG2 (3.0)	AMIGO1 (2.9)	FGF12 (2.6)	TMEM204 (2.5)	CHPF (2.5)
ENSG00000093167	LRRFIP2 PPI subnetwork	0.000234	0.00741	<0.20	3.63078	2.13018	1.5006	ENSG00000224080 (5.2)	FHL2 (3.4)	MYO1H (3.3)	SPTBN1 (3.3)	OXSR1 (3.0)	CDC42BPA (2.9)	LRRFIP2 (2.9)	OSBPL9 (2.8)	GOLGA4 (2.6)	AIM1L (2.6)
ENSG00000015285	WAS PPI subnetwork	0.000237	0.05	<0.20	3.62525	1.30103	2.32422	SH3BGRL3 (4.6)	PFN1 (3.8)	RHOA (3.8)	CAPZA2 (3.7)	SEPT7 (3.4)	ELMO1 (3.2)	DOK2 (3.1)	TES (3.1)	RAP2B (3.0)	LIMD2 (3.0)
ENSG00000166949	SMAD3 PPI subnetwork	0.000238	0.00501	<0.20	3.62342	2.30016	1.32326	GH2 (3.9)	EP300 (3.6)	CSRNP1 (3.4)	MAP7D1 (3.1)	CCNL1 (3.1)	SKI (3.1)	CDKN1A (3.0)	KIAA0913 (3.0)	CRAMP1L (2.9)	ZC3H7B (2.9)
ENSG00000134202	GSTM3 PPI subnetwork	0.000246	0.00926	<0.20	3.60906	2.03339	1.57568	CTTNBP2NL (4.0)	ENSG00000259134 (3.1)	KCTD10 (3.1)	MYO1H (3.0)	CDC42BPA (2.9)	VEPH1 (2.8)	SPTBN1 (2.7)	MAP3K11 (2.5)	FREM2 (2.4)	SENP2 (2.4)
ENSG00000123384	LRP1 PPI subnetwork	0.000252	0.08	<0.20	3.5986	1.09691	2.50169	BPI (4.7)	FNDC3B (4.0)	FERMT2 (3.2)	PHLDB2 (3.0)	ITGAV (2.9)	ITGB1 (2.9)	LAMB2 (2.8)	CAV2 (2.7)	ENSG00000237013 (2.7)	MTUS1 (2.6)
ENSG00000174996	KLC2 PPI subnetwork	0.000253	0.00694	<0.20	3.59688	2.15864	1.43824	DSP (4.0)	PRKCZ (3.8)	SIPA1L1 (3.4)	AIM1L (3.3)	MGEA5 (3.3)	MOBP (3.0)	FAT1 (2.8)	MACF1 (2.7)	SPTBN1 (2.6)	MAPK8IP3 (2.6)
ENSG00000113658	SMAD5 PPI subnetwork	0.000257	0.0073	<0.20	3.59007	2.13668	1.45339	ID2 (5.0)	ZMIZ1 (3.7)	CTTNBP2NL (3.3)	SKI (3.0)	FLRT2 (3.0)	CDH2 (2.9)	MAP3K3 (2.9)	TBX5 (2.7)	DCBLD1 (2.7)	MPPED2 (2.6)
ENSG00000143549	TPM3 PPI subnetwork	0.000258	0.00392	<0.20	3.58838	2.40671	1.18167	DOK2 (5.1)	SH3BGRL3 (3.8)	DES (3.7)	CRYAB (3.5)	RHOA (3.4)	MYOZ1 (3.2)	SPEG (3.1)	TRDN (3.0)	PLEC (3.0)	ENO3 (2.9)
ENSG00000162704	ARPC5 PPI subnetwork	0.000258	0.02	<0.20	3.58838	1.69897	1.88941	SPTBN1 (4.0)	ITGB1 (3.9)	PFN1 (3.7)	PLEC (3.7)	CAV2 (3.6)	KCTD10 (3.6)	CAV1 (3.5)	MACF1 (3.4)	TES (3.3)	SH3BGRL3 (3.3)
ENSG00000155506	LARP1 PPI subnetwork	0.000277	0.01	<0.20	3.55752	2	1.55752	PLEC (3.2)	MACF1 (3.1)	NCK2 (3.1)	MARK3 (2.9)	UBE3B (2.9)	OBSL1 (2.8)	CSNK1G1 (2.8)	DSP (2.8)	TRAK1 (2.7)	SPEG (2.6)
ENSG00000116809	ZBTB17 PPI subnetwork	0.000286	0.06	<0.20	3.54363	1.22185	2.32179	TBX3 (4.2)	SLC27A6 (3.5)	ENSG00000238018 (3.0)	ADPRHL1 (3.0)	MPPED2 (3.0)	MYH6 (2.8)	SYNPO2L (2.8)	TSC22D2 (2.7)	XIRP1 (2.6)	CSDC2 (2.6)
ENSG00000198947	DMD PPI subnetwork	0.000295	0.00229	<0.20	3.53018	2.64016	0.890013	DES (5.5)	SYNPO2L (5.4)	SRL (5.1)	LDB3 (4.7)	CEFIP (4.6)	AKAP6 (4.6)	ENO3 (4.3)	DTNA (4.3)	TRDN (4.3)	MYH6 (4.2)
ENSG00000127947	PTPN12 PPI subnetwork	0.000296	0.00133	<0.20	3.52871	2.87615	0.65256	TFEB (3.8)	GH2 (3.8)	RAB3B (3.2)	CSH2 (2.9)	PHLDB2 (2.9)	IRF8 (2.7)	FRMD4B (2.6)	EIF2C2 (2.6)	PARP8 (2.5)	PPPDE2 (2.4)
ENSG00000102024	PLS3 PPI subnetwork	0.000297	0.03	<0.20	3.52724	1.52288	2.00436	PFN1 (5.1)	RHOA (4.4)	GORASP1 (3.7)	TES (3.4)	MACF1 (3.1)	RNF11 (2.9)	KCTD10 (2.9)	CAPZA2 (2.8)	FHL2 (2.8)	SH3BGRL3 (2.7)
ENSG00000143622	RIT1 PPI subnetwork	0.000304	0.04	<0.20	3.51713	1.39794	2.11919	MKLN1 (4.0)	ENSG00000182109 (2.7)	PRKCA (2.5)	MINK1 (2.4)	CCBE1 (2.4)	ENSG00000240280 (2.3)	FAM59A (2.3)	C5orf41 (2.3)	GNAI3 (2.2)	CBX8 (2.2)
ENSG00000126001	CEP250 PPI subnetwork	0.000317	0.00731	<0.20	3.49894	2.13608	1.36286	CCDC141 (3.1)	AFF1 (3.1)	PLEC (3.0)	UBE3B (3.0)	MACF1 (2.9)	GOLGA4 (2.9)	MGEA5 (2.8)	NCK2 (2.7)	C11orf9 (2.7)	MARK3 (2.7)
ENSG00000058668	ATP2B4 PPI subnetwork	0.000331	0.03	<0.20	3.48017	1.52288	1.95729	FGF14 (3.5)	KCNIP2 (3.0)	TMEM198 (2.8)	SLCO6A1 (2.8)	ADCY5 (2.7)	TEF (2.7)	TMEM59L (2.6)	GJC2 (2.6)	RYR2 (2.6)	NEURL (2.6)
ENSG00000071564	TCF3 PPI subnetwork	0.000332	0.01	<0.20	3.47886	2	1.47886	PITX3 (3.8)	ID2 (3.7)	HLX (3.5)	ZNF503 (3.4)	SSBP3 (3.0)	ACCN4 (3.0)	ZMIZ1 (3.0)	SYNPO2L (2.8)	STK11 (2.8)	RFX4 (2.8)
ENSG00000105048	TNNT1 PPI subnetwork	0.000348	0.07	<0.20	3.45842	1.1549	2.30352	MYH7 (8.1)	MYOZ1 (7.9)	TTN (7.5)	ENO3 (7.4)	TRDN (7.3)	LDB3 (6.6)	CEFIP (6.5)	SYNPO2L (6.5)	DUSP13 (6.2)	SRL (5.8)
ENSG00000110931	CAMKK2 PPI subnetwork	0.000357	0.02	<0.20	3.44733	1.69897	1.74836	MAP3K3 (3.2)	RYR2 (3.1)	PABPN1 (3.0)	KCNIP2 (3.0)	CDH13 (3.0)	LINC00477 (2.9)	TFEB (2.8)	FDPS (2.7)	ZC3H7B (2.6)	ADCY5 (2.6)
ENSG00000140443	IGF1R PPI subnetwork	0.00036	0.22	<0.20	3.4437	0.657577	2.78612	SBNO2 (3.7)	ITGAV (3.0)	SRGAP1 (2.9)	PRRX1 (2.8)	EPS15 (2.8)	CSNK1G1 (2.7)	MPPED2 (2.7)	GJA1 (2.7)	FNDC3B (2.6)	CAV2 (2.6)
ENSG00000131746	TNS4 PPI subnetwork	0.000369	0.02	<0.20	3.43297	1.69897	1.734	AIM1L (4.0)	DSP (3.9)	FAM59A (3.3)	PHLDB2 (3.3)	COL17A1 (3.1)	FAT1 (3.0)	MTUS1 (2.9)	SPTBN1 (2.8)	CAV2 (2.7)	FHL2 (2.6)
ENSG00000175387	SMAD2 PPI subnetwork	0.000372	0.04	<0.20	3.42946	1.39794	2.03152	LDB1 (3.6)	CLK2 (3.3)	SMARCB1 (3.2)	KIAA0913 (3.1)	ASH1L (3.0)	MAP7D1 (3.0)	TRIM32 (2.9)	ZC3H7B (2.9)	ZMIZ1 (2.9)	ZNF592 (2.9)
ENSG00000162337	LRP5 PPI subnetwork	0.000377	0.05	<0.20	3.42366	1.30103	2.12263	FREM2 (4.7)	PDZRN3 (3.8)	FGFR1 (3.6)	BMPR1A (3.4)	NPR3 (3.3)	CDH2 (3.0)	MPPED2 (3.0)	CRIM1 (2.9)	ID2 (2.9)	FAM171B (2.8)
ENSG00000197122	SRC PPI subnetwork	0.000387	0.02	<0.20	3.41229	1.69897	1.71332	MINK1 (3.7)	PLEC (3.6)	SPTBN1 (3.1)	PRKCA (3.0)	SRGAP1 (3.0)	EPAS1 (2.9)	PODXL (2.8)	DLC1 (2.8)	CAV2 (2.8)	PTK2 (2.7)
ENSG00000169220	RGS14 PPI subnetwork	0.000389	0.00749	<0.20	3.41005	2.12552	1.28453	OXSR1 (3.9)	MYD88 (3.4)	USP4 (3.4)	LRRFIP2 (3.3)	PRKAR2A (3.2)	RAP1A (3.2)	ITGA9 (3.1)	ACAA1 (3.1)	RELA (2.8)	SEPT7 (2.8)
ENSG00000104067	TJP1 PPI subnetwork	0.000404	0.00789	<0.20	3.39362	2.10292	1.2907	DSP (3.5)	DES (3.1)	RBPMS (3.1)	FREM2 (3.0)	CRYAB (2.9)	MACF1 (2.8)	SPTBN1 (2.7)	FERMT2 (2.7)	MINK1 (2.6)	CCK (2.5)
ENSG00000037280	FLT4 PPI subnetwork	0.000412	0.02	<0.20	3.3851	1.69897	1.68613	TBX3 (3.7)	DLC1 (3.6)	CAV1 (3.3)	TMEM204 (3.2)	CCBE1 (3.0)	PODXL (2.9)	SDPR (2.7)	COL13A1 (2.6)	HSPG2 (2.5)	FERMT2 (2.5)
ENSG00000138594	TMOD3 PPI subnetwork	0.000423	0.000502	<0.05	3.37366	3.2993	0.0743633	PFN1 (4.8)	CRYAB (4.1)	MYOCD (4.1)	MACF1 (4.1)	ITGB1 (3.8)	RHOA (3.7)	KCTD10 (3.7)	SPTBN1 (3.7)	DES (3.5)	SORBS1 (3.5)
ENSG00000095637	SORBS1 PPI subnetwork	0.000433	0.01	<0.20	3.36351	2	1.36351	TFEB (3.8)	PLEC (3.4)	HSPG2 (3.0)	KDM1B (2.8)	SHARPIN (2.5)	DLG1 (2.5)	GRINA (2.5)	PODXL (2.5)	MAP3K11 (2.5)	SBNO2 (2.4)
ENSG00000133794	ARNTL PPI subnetwork	0.000434	0.00232	<0.20	3.36251	2.63451	0.727998	TEF (8.3)	TOB2 (6.3)	CSRNP1 (4.9)	NR3C1 (3.9)	EP300 (3.5)	THRB (3.3)	NFKBIA (3.3)	TFEB (3.1)	AFF1 (3.1)	FBXO11 (2.9)
ENSG00000123836	PFKFB2 PPI subnetwork	0.000434	0.02	<0.20	3.36251	1.69897	1.66354	SSBP3 (3.4)	UBE3B (3.2)	CCDC141 (3.2)	MACF1 (3.1)	NAV2 (3.1)	PLEC (3.0)	SRGAP1 (2.9)	TRAK1 (2.9)	MARK3 (2.8)	OBSL1 (2.6)
ENSG00000198211	TUBB3 PPI subnetwork	0.000435	0.000674	<0.05	3.36151	3.17134	0.190171	PFN1 (4.3)	RHOA (3.7)	SEPT7 (3.5)	PABPN1 (3.4)	ITGB1 (3.4)	WDR6 (3.3)	GNAI3 (3.3)	MACF1 (3.0)	KCTD10 (2.7)	PPIB (2.7)
ENSG00000006468	ETV1 PPI subnetwork	0.000439	0.16	<0.20	3.35754	0.79588	2.56166	MAP3K3 (3.4)	MTUS1 (3.4)	MAP3K11 (3.3)	CEP85 (2.8)	SIPA1 (2.7)	TFEB (2.7)	ASH1L (2.6)	ST7-OT4 (2.5)	PRKAR2A (2.4)	GRINA (2.4)
ENSG00000196262	PPIA PPI subnetwork	0.00044	0.00104	<0.20	3.35655	2.98297	0.373581	PFN1 (4.6)	ITGB1 (4.3)	SH3BGRL3 (3.8)	PPIB (3.6)	RNF167 (3.1)	PLEC (3.1)	SEPT7 (3.0)	TES (2.9)	MACF1 (2.9)	RHOA (2.9)
ENSG00000198618	ENSG00000198618 PPI subnetwork	0.00044	0.00104	<0.20	3.35655	2.98297	0.373581	PFN1 (4.6)	ITGB1 (4.3)	SH3BGRL3 (3.8)	PPIB (3.6)	RNF167 (3.1)	PLEC (3.1)	SEPT7 (3.0)	TES (2.9)	MACF1 (2.9)	RHOA (2.9)
ENSG00000078061	ARAF PPI subnetwork	0.00044	0.13	<0.20	3.35655	0.886057	2.47049	PLEC (3.0)	COL17A1 (2.8)	FAT1 (2.8)	CRIM1 (2.8)	AIM1L (2.7)	TFEB (2.7)	DSP (2.7)	PHLDB2 (2.7)	FERMT2 (2.6)	TEF (2.5)
ENSG00000160867	FGFR4 PPI subnetwork	0.000443	0.02	<0.20	3.3536	1.69897	1.65463	WNT11 (5.5)	SCN5A (4.1)	FGF18 (3.3)	NAV2 (3.1)	PDZRN3 (2.8)	KCNIP2 (2.8)	OPN4 (2.8)	MGAT5 (2.7)	DLC1 (2.7)	NPR3 (2.5)
ENSG00000183091	NEB PPI subnetwork	0.000444	0.00402	<0.20	3.35262	2.39577	0.956843	TRDN (7.7)	MYOZ1 (7.6)	SYPL2 (7.1)	XIRP1 (6.9)	LDB3 (6.8)	OBSCN (6.6)	ENO3 (6.4)	SRL (6.1)	DUSP13 (5.7)	MYH7 (5.5)
ENSG00000162552	WNT4 PPI subnetwork	0.000444	0.04	<0.20	3.35262	1.39794	1.95468	FGFR1 (3.3)	PDZRN3 (3.1)	DFNB59 (3.1)	ADAMTSL3 (3.1)	FGF18 (3.0)	ITGA9 (3.0)	ENSG00000223960 (2.8)	PDGFRL (2.7)	SEMA3D (2.7)	C5orf13 (2.7)
ENSG00000111676	ATN1 PPI subnetwork	0.000455	0.22	<0.20	3.34199	0.657577	2.68441	LAMB2 (4.8)	HSPG2 (4.3)	ZNF609 (3.7)	KIAA0913 (3.2)	SKI (3.2)	FGFR1 (3.2)	SSBP3 (3.1)	ZNF358 (3.1)	ZNF219 (3.0)	ZC3H7B (2.7)
ENSG00000081052	COL4A4 PPI subnetwork	0.00046	0.04	<0.20	3.33724	1.39794	1.9393	DPT (4.9)	FKBP7 (4.2)	TCF21 (3.9)	KIAA1755 (3.7)	ZCCHC24 (3.5)	CDH2 (3.2)	DSP (3.2)	SSPN (3.2)	CAV1 (3.1)	CHRNE (3.1)
ENSG00000118785	SPP1 PPI subnetwork	0.000466	0.09	<0.20	3.33161	1.04576	2.28586	PRKAB2 (4.2)	MMP11 (4.2)	ITGAV (3.3)	RBPMS (3.0)	PDLIM5 (2.9)	ITGB1 (2.9)	LRRFIP2 (2.8)	CHRM2 (2.8)	MET (2.7)	SORBS1 (2.6)
ENSG00000171241	SHCBP1 PPI subnetwork	0.000469	0.00987	<0.20	3.32883	2.00568	1.32314	COL17A1 (3.8)	DSP (3.5)	FHL2 (3.4)	AIM1L (3.2)	PHLDB2 (3.1)	FAT1 (2.9)	MTUS1 (2.9)	YY1AP1 (2.7)	PRKCZ (2.7)	ZNF219 (2.7)
ENSG00000099204	ABLIM1 PPI subnetwork	0.000471	0.04	<0.20	3.32698	1.39794	1.92904	OSBPL9 (3.6)	SPEG (3.4)	DSP (3.4)	FHL2 (3.1)	PRKCZ (3.0)	PHLDB2 (2.9)	FAM184A (2.8)	FERMT2 (2.8)	MAP7D1 (2.7)	RHOA (2.7)
ENSG00000166167	BTRC PPI subnetwork	0.000488	0.00642	<0.20	3.31158	2.19246	1.11912	TEF (4.9)	TOB2 (4.0)	ARID2 (3.4)	CSRNP1 (3.3)	NFKBIA (3.3)	TSC22D2 (3.2)	TLE3 (3.2)	YY1AP1 (3.0)	LRIG1 (3.0)	MKLN1 (2.9)
ENSG00000166913	YWHAB PPI subnetwork	0.000493	0.00708	<0.20	3.30715	2.14997	1.15719	MAP7D1 (4.0)	EIF2C2 (3.7)	TRAK1 (3.4)	PLEC (3.0)	DSP (2.8)	OXSR1 (2.8)	SUN1 (2.7)	MTA3 (2.7)	CHD6 (2.6)	ZNF609 (2.5)
ENSG00000101665	SMAD7 PPI subnetwork	0.000494	0.03	<0.20	3.30627	1.52288	1.78339	ID2 (4.5)	ZNF609 (4.1)	MAP3K3 (3.5)	CTDSPL (3.4)	ARID2 (3.3)	ZMIZ1 (3.3)	ZNF592 (3.0)	NR3C1 (3.0)	BMPR1A (2.8)	TFEB (2.7)
ENSG00000082781	ITGB5 PPI subnetwork	0.000499	0.01	<0.20	3.3019	2	1.3019	MET (6.1)	CAV1 (5.4)	ITGAV (4.9)	CAV2 (4.6)	FERMT2 (4.5)	PHLDB2 (4.4)	ITGB1 (4.3)	HSPG2 (3.7)	FNDC3B (3.6)	RBPMS (3.4)
ENSG00000129250	KIF1C PPI subnetwork	0.000503	0.03	<0.20	3.29843	1.52288	1.77555	PLEC (3.3)	UBE3B (3.0)	OBSL1 (2.9)	BTRC (2.9)	CCDC141 (2.9)	DSP (2.8)	NCK2 (2.8)	MGEA5 (2.8)	CLOCK (2.7)	ANKRD13B (2.7)
ENSG00000165476	REEP3 PPI subnetwork	0.000512	0.02	<0.20	3.29073	1.69897	1.59176	COL17A1 (3.6)	FAM59A (3.4)	DSP (3.4)	AIM1L (3.3)	FAT1 (3.1)	FHL2 (3.1)	MTUS1 (3.1)	PRKCZ (2.9)	PHLDB2 (2.8)	TRAK1 (2.8)
ENSG00000120693	SMAD9 PPI subnetwork	0.000513	0.000233	<0.05	3.28988	3.63264	-0.342761	GH2 (4.5)	ID2 (4.3)	AFF1 (3.9)	GPAA1 (3.6)	ZMIZ1 (3.2)	USP19 (3.1)	CALHM2 (3.1)	DAG1 (2.8)	PLEC (2.7)	WNT11 (2.6)
ENSG00000179335	CLK3 PPI subnetwork	0.000513	0.02	<0.20	3.28988	1.69897	1.59091	EP300 (4.3)	ASH1L (3.5)	PABPN1 (3.3)	XPC (3.2)	USP19 (3.1)	L3MBTL2 (3.0)	MACF1 (2.9)	GBF1 (2.9)	TSC22D2 (2.8)	NCKIPSD (2.8)
ENSG00000134871	COL4A2 PPI subnetwork	0.000515	0.00286	<0.20	3.28819	2.54363	0.744559	HSPG2 (5.8)	FKBP7 (4.6)	TMEM204 (4.2)	CAV1 (4.2)	C5orf13 (4.2)	DPT (3.9)	CDH13 (3.7)	CDH2 (3.6)	CRLF1 (3.4)	FERMT2 (3.3)
ENSG00000065361	ERBB3 PPI subnetwork	0.000521	0.03	<0.20	3.28316	1.52288	1.76028	CTDSPL (3.2)	DLG1 (3.1)	SIPA1L1 (2.8)	CSRNP1 (2.8)	IRX3 (2.4)	CHD6 (2.4)	COL17A1 (2.3)	SRGAP1 (2.3)	CTTNBP2NL (2.3)	RAP2B (2.2)
ENSG00000214021	TTLL3 PPI subnetwork	0.000524	0.05	<0.20	3.28067	1.30103	1.97964	RHOA (4.4)	SH3BGRL3 (3.8)	PFN1 (3.6)	FHL2 (3.6)	OSBPL9 (3.5)	TES (3.0)	CAPZA2 (3.0)	BEND7 (2.8)	MACF1 (2.6)	PI16 (2.6)
ENSG00000075651	PLD1 PPI subnetwork	0.000534	0.1	<0.20	3.27246	1	2.27246	PFN1 (4.3)	CAV2 (3.8)	CDC42BPA (3.4)	LRRFIP2 (3.3)	GNAI3 (3.2)	SH3BGRL3 (3.1)	RHOA (3.1)	SEPT7 (3.1)	MARCKS (3.0)	RAP1A (3.0)
ENSG00000100815	TRIP11 PPI subnetwork	0.000543	0.00767	<0.20	3.2652	2.1152	1.15	AFF1 (3.7)	UBE3B (3.1)	CCDC141 (3.0)	OBSL1 (3.0)	MARK3 (2.9)	C11orf9 (2.9)	MACF1 (2.8)	PLEC (2.8)	DSP (2.6)	RCBTB1 (2.6)
ENSG00000083857	FAT1 PPI subnetwork	0.000546	0.32	<0.20	3.26281	0.49485	2.76796	SETD6 (3.4)	SESTD1 (2.8)	RASEF (2.7)	ASTN2 (2.7)	SKI (2.6)	ANKRD13B (2.6)	COMTD1 (2.6)	CYP39A1 (2.5)	CAV1 (2.4)	DPT (2.4)
ENSG00000142875	PRKACB PPI subnetwork	0.000548	0.03	<0.20	3.26122	1.52288	1.73834	CACNA1G (4.2)	DES (4.2)	SPEG (4.1)	MYOCD (4.0)	KCNIP2 (3.8)	KCND3 (3.5)	SORBS1 (3.4)	RBPMS2 (3.3)	BSN (3.1)	FREM2 (3.0)
ENSG00000105974	CAV1 PPI subnetwork	0.000549	0.02	<0.20	3.26043	1.69897	1.56146	PLEC (3.8)	MTUS1 (3.8)	MET (3.7)	EPAS1 (3.6)	HSPG2 (3.5)	COL17A1 (3.3)	ITGB1 (3.3)	ITGAV (3.2)	PLCD1 (2.9)	PHLDB2 (2.9)
ENSG00000134318	ROCK2 PPI subnetwork	0.000567	0.000965	<0.05	3.24642	3.01547	0.230944	ZC3H7B (4.1)	MOBP (3.8)	TEF (3.1)	CCK (2.9)	TMEM198 (2.9)	BSN (2.8)	NEURL (2.4)	SUN1 (2.4)	PHLDB2 (2.4)	SLC9A2 (2.3)
ENSG00000204227	RING1 PPI subnetwork	0.000574	0.00938	<0.20	3.24109	2.0278	1.21329	ZNF219 (3.5)	FNDC3A (3.3)	FBXO11 (3.3)	ARID2 (3.2)	TFAP4 (3.1)	MARK3 (3.0)	TELO2 (2.8)	TOB2 (2.6)	MUC1 (2.6)	SMARCB1 (2.5)
ENSG00000206215	ENSG00000206215 PPI subnetwork	0.000574	0.00938	<0.20	3.24109	2.0278	1.21329	ZNF219 (3.5)	FNDC3A (3.3)	FBXO11 (3.3)	ARID2 (3.2)	TFAP4 (3.1)	MARK3 (3.0)	TELO2 (2.8)	TOB2 (2.6)	MUC1 (2.6)	SMARCB1 (2.5)
ENSG00000206287	RING1 PPI subnetwork	0.000574	0.00938	<0.20	3.24109	2.0278	1.21329	ZNF219 (3.5)	FNDC3A (3.3)	FBXO11 (3.3)	ARID2 (3.2)	TFAP4 (3.1)	MARK3 (3.0)	TELO2 (2.8)	TOB2 (2.6)	MUC1 (2.6)	SMARCB1 (2.5)
ENSG00000104267	CA2 PPI subnetwork	0.00059	0.12	<0.20	3.22915	0.920819	2.30833	DAP3 (3.4)	GOT2 (3.4)	RIC8B (3.1)	CSDC2 (3.1)	RUSC1 (3.0)	ACO2 (2.9)	PPARGC1A (2.7)	KLHL26 (2.7)	MTHFD1 (2.6)	OPLAH (2.6)
ENSG00000166501	PRKCB PPI subnetwork	0.000604	0.03	<0.20	3.21896	1.52288	1.69608	KCNIP2 (3.7)	ADRB1 (3.4)	NEURL (3.3)	BSN (3.1)	DGKB (2.9)	FGF14 (2.9)	MAPK8IP3 (2.7)	RYR2 (2.7)	MGEA5 (2.6)	SUN1 (2.6)
ENSG00000114251	WNT5A PPI subnetwork	0.000608	0.09	<0.20	3.2161	1.04576	2.17034	PDGFRL (4.7)	FGFR1 (4.6)	PDZRN3 (4.2)	BMPR1A (3.8)	C5orf13 (3.6)	ADAMTSL3 (3.4)	ITGA9 (3.4)	PI16 (3.2)	NPR3 (3.1)	FGF18 (3.0)
ENSG00000005249	PRKAR2B PPI subnetwork	0.000609	0.02	<0.20	3.21538	1.69897	1.51641	KCNIP2 (5.5)	BSN (4.6)	ADCY5 (4.5)	DGKB (3.5)	TMEM198 (3.5)	TEF (3.3)	STRN (3.3)	MAPK8IP3 (3.3)	MINK1 (3.2)	SLC35F1 (3.2)
ENSG00000166908	PIP4K2C PPI subnetwork	0.000651	0.00105	<0.20	3.18642	2.97881	0.207608	FOXP1 (3.5)	AFF1 (3.3)	SORBS1 (3.2)	PLEKHA3 (3.2)	KIAA0754 (3.0)	PPP2R1B (2.9)	TRAK1 (2.9)	ZNF592 (2.8)	DIXDC1 (2.7)	HEATR5B (2.7)
ENSG00000137975	CLCA2 PPI subnetwork	0.000665	0.00359	<0.20	3.17718	2.44491	0.732273	APOH (6.2)	RYR2 (3.1)	MYH6 (3.0)	ENSG00000249700 (3.0)	SLC38A7 (2.9)	CDH2 (2.7)	DSP (2.6)	FMO5 (2.6)	ESR2 (2.6)	EML4 (2.5)
ENSG00000116095	PLEKHA3 PPI subnetwork	0.00068	0.06	<0.20	3.16749	1.22185	1.94564	DES (5.2)	ENO3 (3.9)	PDLIM5 (3.9)	TTN (3.5)	MYH7 (3.5)	CAV1 (3.3)	LDB3 (3.3)	DPT (3.3)	SRL (3.2)	SYNPO2L (3.0)
ENSG00000169032	MAP2K1 PPI subnetwork	0.000687	0.01	<0.20	3.16304	2	1.16304	CCK (3.9)	CAPZA2 (3.7)	RAP2B (3.1)	NEURL (2.9)	MYH7 (2.9)	BSN (2.8)	NKX2-5 (2.8)	DGKB (2.7)	RYR2 (2.6)	MAP7D1 (2.6)
ENSG00000099308	MAST3 PPI subnetwork	0.000693	0.00819	<0.20	3.15927	2.08672	1.07255	PLEC (3.6)	MACF1 (3.3)	C11orf9 (3.0)	DSP (3.0)	DLG1 (2.9)	MARK3 (2.9)	TRAK1 (2.9)	BTRC (2.8)	UBE3B (2.8)	CLOCK (2.7)
ENSG00000198802	ENSG00000198802 PPI subnetwork	0.000707	0.04	<0.20	3.15058	1.39794	1.75264	TES (3.8)	SIPA1 (3.6)	CD52 (3.5)	CD79B (3.1)	CALHM2 (2.9)	SPTBN1 (2.9)	GJA1 (2.9)	ITGA9 (2.8)	HSPG2 (2.8)	ENSG00000215570 (2.7)
ENSG00000169047	IRS1 PPI subnetwork	0.000708	0.06	<0.20	3.14997	1.22185	1.92812	NCK2 (3.4)	SBNO2 (3.0)	CAV2 (2.8)	SESTD1 (2.7)	MGEA5 (2.7)	DLC1 (2.7)	KCTD10 (2.7)	COL17A1 (2.7)	CHD6 (2.6)	DLG1 (2.6)
ENSG00000178363	CALML3 PPI subnetwork	0.000714	0.02	<0.20	3.1463	1.69897	1.44733	TRDN (5.5)	MYOZ1 (5.1)	DTNA (4.9)	OBSCN (4.8)	DES (4.2)	LDB3 (4.1)	SPEG (4.1)	ENO3 (4.1)	DUSP13 (4.1)	CEFIP (4.0)
ENSG00000171132	PRKCE PPI subnetwork	0.000719	0.02	<0.20	3.14327	1.69897	1.4443	MYH7 (5.5)	TTN (5.0)	DES (4.5)	TRDN (4.4)	RYR2 (4.4)	MYH6 (4.4)	LDB3 (4.1)	SYNPO2L (4.1)	MYOZ1 (4.1)	SRL (4.1)
ENSG00000160293	VAV2 PPI subnetwork	0.000725	0.11	<0.20	3.13966	0.958607	2.18105	SRGAP1 (2.9)	IRX3 (2.6)	ZMIZ1 (2.5)	MGAT5 (2.5)	PRKCA (2.5)	CALHM3 (2.4)	SPTBN1 (2.4)	AFF1 (2.4)	SMARCD2 (2.3)	ENSG00000259134 (2.2)
ENSG00000204361	FAM55B PPI subnetwork	0.000727	0.00541	<0.20	3.13847	2.2668	0.871663	PLEC (4.5)	FERMT2 (4.4)	CAV1 (4.0)	FHL2 (3.9)	SPTBN1 (3.7)	TES (3.7)	PHLDB2 (3.5)	ITGB1 (3.3)	COL17A1 (3.1)	HSPG2 (3.0)
ENSG00000007866	TEAD3 PPI subnetwork	0.000729	0.04	<0.20	3.13727	1.39794	1.73933	MACF1 (3.4)	MGEA5 (2.9)	NAV2 (2.8)	MARK3 (2.7)	C11orf9 (2.7)	DAG1 (2.6)	NCK2 (2.6)	CLOCK (2.6)	OBSL1 (2.6)	PLEC (2.5)
ENSG00000102683	SGCG PPI subnetwork	0.000733	0.01	<0.20	3.1349	2	1.1349	DES (5.1)	XIRP1 (4.6)	LDB3 (4.5)	AKAP6 (4.4)	SYNPO2L (4.4)	SPEG (4.2)	CORO6 (4.2)	PRKAB2 (4.2)	SSPN (4.2)	DTNA (4.1)
ENSG00000148180	GSN PPI subnetwork	0.000737	0.0017	<0.20	3.13253	2.76955	0.362981	FHL2 (5.2)	MACF1 (4.9)	TES (4.8)	PDLIM5 (4.5)	PFN1 (4.5)	KCTD10 (4.3)	FERMT2 (4.0)	PHLDB2 (3.9)	RBPMS (3.8)	ITGB1 (3.7)
ENSG00000134602	ENSG00000134602 PPI subnetwork	0.000741	0.00526	<0.20	3.13018	2.27901	0.851168	CAPZA2 (4.5)	RAP1A (3.4)	C3orf62 (3.4)	SEMA3A (3.2)	GNAI3 (2.8)	FHL2 (2.7)	ADCY5 (2.7)	MKLN1 (2.6)	PLN (2.6)	SEPT7 (2.6)
ENSG00000159023	EPB41 PPI subnetwork	0.000751	0.03	<0.20	3.12436	1.52288	1.60148	CHCHD1 (3.8)	PFN1 (3.7)	ATP6V0E1 (3.7)	GLRX5 (3.5)	CRYAB (3.4)	NDUFAF3 (3.4)	ST13 (3.3)	SEC11A (3.0)	MYOZ1 (3.0)	NHP2L1 (2.9)
ENSG00000162614	NEXN PPI subnetwork	0.00076	0.03	<0.20	3.11919	1.52288	1.59631	FERMT2 (4.0)	TES (4.0)	SPTBN1 (4.0)	FHL2 (3.8)	KCTD10 (3.8)	PLEC (3.8)	CTTNBP2NL (3.7)	PHLDB2 (3.5)	DSP (3.4)	CDC42BPA (3.3)
ENSG00000179364	PACS2 PPI subnetwork	0.000761	0.02	<0.20	3.11862	1.69897	1.41965	COL17A1 (3.8)	DSP (3.7)	AIM1L (3.6)	FAT1 (3.5)	FAM59A (3.3)	PHLDB2 (3.2)	FHL2 (3.1)	MTUS1 (2.9)	CTDSPL (2.7)	PRKCZ (2.7)
ENSG00000100395	L3MBTL2 PPI subnetwork	0.000767	0.25	<0.20	3.1152	0.60206	2.51314	TFAP4 (4.1)	MARK3 (3.8)	ZNF219 (3.6)	ARID2 (3.3)	LDB1 (3.3)	SSBP3 (3.1)	PABPN1 (3.1)	TOB2 (3.1)	ZNF358 (3.0)	TLE3 (2.8)
ENSG00000107779	BMPR1A PPI subnetwork	0.000768	0.000677	<0.05	3.11464	3.16941	-0.0547726	ID2 (5.2)	WNT11 (4.3)	ZNF592 (3.5)	CTDSPL (3.4)	NMB (3.3)	DIXDC1 (3.3)	PPP2R1B (3.2)	ZNF609 (3.1)	PRKAR2A (3.0)	FLRT2 (3.0)
ENSG00000137218	FRS3 PPI subnetwork	0.000774	0.00496	<0.20	3.11126	2.30452	0.806741	WNT11 (4.2)	C11orf9 (3.8)	DLC1 (3.5)	CCBE1 (3.5)	FGF18 (3.5)	NPR3 (3.3)	NAV2 (3.1)	FREM2 (3.1)	MSX2 (3.0)	VEPH1 (2.9)
ENSG00000150995	ITPR1 PPI subnetwork	0.000776	0.16	<0.20	3.11014	0.79588	2.31426	BSN (4.3)	SPEG (4.2)	MYOCD (3.8)	DGKB (3.5)	CCK (3.2)	NEURL (3.1)	TMEM198 (3.1)	RCAN2 (3.0)	MAPK8IP3 (2.9)	IL17D (2.9)
ENSG00000166025	AMOTL1 PPI subnetwork	0.000793	0.07	<0.20	3.10073	1.1549	1.94582	CNOT1 (5.5)	WDR6 (4.8)	GBF1 (4.5)	KIAA0913 (3.6)	ACVR2B (3.5)	USP19 (3.5)	HEATR5B (3.4)	CHD6 (3.4)	PCNXL3 (3.4)	ARID2 (3.2)
ENSG00000127329	PTPRB PPI subnetwork	0.000795	0.00511	<0.20	3.09963	2.29158	0.808054	PODXL (5.0)	EFNA1 (4.0)	CAV1 (3.8)	CAV2 (3.5)	EPAS1 (3.5)	FERMT2 (3.2)	ZFPM2 (3.1)	PHLDB2 (3.1)	TMEM204 (3.0)	COL13A1 (3.0)
ENSG00000196540	ENSG00000196540 PPI subnetwork	0.00081	0.00462	<0.20	3.09151	2.33536	0.756157	APOH (5.9)	ENSG00000249700 (3.1)	RYR2 (3.1)	MYH6 (3.0)	SLC38A7 (2.9)	DSP (2.9)	FMO5 (2.8)	CDH2 (2.5)	SLC6A4 (2.4)	ESR2 (2.4)
ENSG00000108256	NUFIP2 PPI subnetwork	0.000811	0.00536	<0.20	3.09098	2.27084	0.820144	XPC (3.6)	EP300 (3.4)	ZNF592 (3.3)	GOLGA4 (3.2)	MACF1 (3.2)	CLOCK (3.1)	USP19 (3.0)	GBF1 (3.0)	NCKIPSD (2.8)	AFF1 (2.8)
ENSG00000099725	ENSG00000099725 PPI subnetwork	0.000817	0.01	<0.20	3.08778	2	1.08778	MYOCD (4.6)	SPEG (4.5)	DES (4.4)	KCNIP2 (4.4)	CACNA1G (4.0)	OBSCN (3.8)	BSN (3.8)	KCND3 (3.7)	TESC (3.6)	LDB3 (3.6)
ENSG00000166225	FRS2 PPI subnetwork	0.000817	0.02	<0.20	3.08778	1.69897	1.38881	DLC1 (4.2)	CCBE1 (4.2)	WNT11 (4.1)	C11orf9 (3.6)	NAV2 (3.3)	PHLDB2 (3.3)	PODXL (3.2)	SPTBN1 (3.1)	TESC (3.1)	ENSG00000238018 (3.0)
ENSG00000107263	RAPGEF1 PPI subnetwork	0.000835	0.05	<0.20	3.07831	1.30103	1.77728	ENSG00000237125 (3.6)	CCBE1 (3.6)	PHLDB2 (3.0)	KCTD10 (3.0)	SPTBN1 (2.9)	DLC1 (2.7)	ZNF608 (2.6)	C12orf23 (2.6)	FGFR1 (2.6)	TRIM32 (2.5)
ENSG00000156675	RAB11FIP1 PPI subnetwork	0.000849	0.00652	<0.20	3.07109	2.18575	0.88534	PLEC (3.8)	MACF1 (3.2)	C11orf9 (3.0)	DSP (2.9)	NCK2 (2.9)	ZNF592 (2.9)	MARK3 (2.9)	CTDSPL (2.8)	TRAK1 (2.8)	CLOCK (2.7)
ENSG00000179715	FAM113B PPI subnetwork	0.000877	0.00425	<0.20	3.057	2.37161	0.685389	APOH (6.0)	RYR2 (3.1)	MYH6 (3.0)	DSP (3.0)	FMO5 (2.9)	ENSG00000249700 (2.9)	SLC38A7 (2.8)	CMTM5 (2.6)	SLC6A4 (2.5)	CDH2 (2.4)
ENSG00000066117	SMARCD1 PPI subnetwork	0.000877	0.02	<0.20	3.057	1.69897	1.35803	WDR6 (3.7)	LDB1 (3.6)	MEIS1 (3.5)	KPNA3 (3.1)	SSBP3 (3.0)	DCAF7 (3.0)	DDX42 (2.9)	SCAF11 (2.9)	EIF2C2 (2.8)	KPNA3-IT1 (2.8)
ENSG00000168542	COL3A1 PPI subnetwork	0.000877	0.18	<0.20	3.057	0.744727	2.31227	PRRX1 (4.5)	DPT (3.4)	LAMB2 (3.3)	SPTBN1 (3.1)	PHLDB2 (3.1)	MET (3.0)	THBS3 (3.0)	FKBP7 (3.0)	FERMT2 (2.9)	GJA1 (2.9)
ENSG00000103126	AXIN1 PPI subnetwork	0.000879	0.02	<0.20	3.05601	1.69897	1.35704	ID2 (4.0)	SKI (3.6)	MKLN1 (3.3)	TSC22D2 (3.3)	ARID2 (3.3)	LDB1 (3.1)	NR3C1 (2.9)	STK11 (2.9)	SSBP3 (2.7)	MGAT5 (2.7)
ENSG00000163486	SRGAP2 PPI subnetwork	0.000885	0.02	<0.20	3.05306	1.69897	1.35409	PLEC (4.2)	DSP (3.3)	MACF1 (3.2)	C11orf9 (2.9)	TRAK1 (2.9)	AFF1 (2.8)	MARK3 (2.7)	UBE3B (2.6)	CLOCK (2.6)	CCDC141 (2.5)
ENSG00000112715	VEGFA PPI subnetwork	0.000892	0.06	<0.20	3.04964	1.22185	1.82779	HSPG2 (3.6)	MOBP (3.3)	HLX (3.2)	MTUS1 (3.1)	BCL2L2 (3.1)	COL13A1 (3.0)	TMEM204 (3.0)	EFNA1 (2.9)	GJA1 (2.9)	PLCD1 (2.7)
ENSG00000154415	PPP1R3A PPI subnetwork	0.000904	0.00578	<0.20	3.04383	2.23807	0.805759	USP4 (3.9)	SORBS1 (3.1)	LRRFIP2 (2.9)	MACF1 (2.8)	SORT1 (2.8)	SLC27A6 (2.7)	MAPK8IP3 (2.7)	DES (2.7)	ACAA1 (2.6)	ZFPM1 (2.6)
ENSG00000140575	IQGAP1 PPI subnetwork	0.000908	0.01	<0.20	3.04191	2	1.04191	RHOA (3.8)	SPTBN1 (3.7)	CAPZA2 (3.5)	ITGB1 (3.4)	PLEC (3.2)	SEPT7 (3.2)	PFN1 (3.0)	GNAI3 (3.0)	SH3BGRL3 (2.7)	MACF1 (2.7)
ENSG00000007264	MATK PPI subnetwork	0.000919	0.12	<0.20	3.03668	0.920819	2.11587	MET (4.2)	CX3CR1 (3.8)	CD52 (3.5)	DOK2 (3.5)	CMTM5 (3.5)	RAP2B (3.0)	HSPG2 (2.9)	GP1BA (2.8)	PLEC (2.7)	COL17A1 (2.7)
ENSG00000151914	DST PPI subnetwork	0.000921	0.00658	<0.20	3.03574	2.18177	0.853966	COL17A1 (6.1)	DSP (4.9)	ENSG00000223960 (3.3)	SPTBN1 (3.0)	SRGAP1 (2.7)	AIM1L (2.6)	CTDSPL (2.5)	CHRM2 (2.5)	CAV2 (2.4)	EPAS1 (2.4)
ENSG00000029363	BCLAF1 PPI subnetwork	0.000923	0.000904	<0.05	3.0348	3.04383	-0.00903327	PFN1 (4.5)	KCTD10 (3.5)	MACF1 (3.4)	ENSG00000236370 (3.3)	SEPT7 (3.1)	CCNL1 (3.1)	MGEA5 (3.0)	ITGB1 (2.9)	WDR6 (2.9)	TES (2.9)
ENSG00000105221	AKT2 PPI subnetwork	0.000947	0.06	<0.20	3.02365	1.22185	1.8018	ENSG00000231730 (3.8)	MTUS1 (3.5)	NFIA (3.1)	WDR48 (2.8)	PCNXL3 (2.8)	MAP3K3 (2.6)	GJA5 (2.5)	STK11 (2.5)	HPS6 (2.5)	DALRD3 (2.4)
ENSG00000160678	S100A1 PPI subnetwork	0.000952	0.00413	<0.20	3.02136	2.38405	0.637313	ENO3 (6.8)	LDB3 (6.5)	TRDN (6.4)	MYOZ1 (6.2)	TTN (6.2)	DES (5.7)	SRL (5.7)	CRYAB (5.6)	OBSCN (5.4)	CEFIP (5.2)
ENSG00000127334	DYRK2 PPI subnetwork	0.000952	0.14	<0.20	3.02136	0.853872	2.16749	FNDC3B (3.7)	NR2F1 (3.5)	ARHGEF40 (2.8)	FUT11 (2.8)	FADS2 (2.8)	TMEM26 (2.8)	EMB (2.6)	TMEM204 (2.5)	BEND5 (2.4)	SDPR (2.3)
ENSG00000170759	KIF5B PPI subnetwork	0.000956	0.00685	<0.20	3.01954	2.16431	0.855233	DSP (4.3)	PLEC (3.2)	MARK3 (3.1)	FHL2 (2.9)	PRKCZ (2.9)	PHLDB2 (2.8)	TRAK1 (2.8)	OXSR1 (2.8)	ZNF592 (2.8)	CTTNBP2NL (2.7)
ENSG00000125731	SH2D3A PPI subnetwork	0.000956	0.01	<0.20	3.01954	2	1.01954	COL17A1 (4.1)	DSP (3.7)	PHLDB2 (3.6)	FAM59A (3.4)	AIM1L (3.4)	FHL2 (3.2)	FAT1 (3.0)	MTUS1 (3.0)	ZNF219 (2.7)	NT5C2 (2.6)
ENSG00000087250	MT3 PPI subnetwork	0.000964	0.06	<0.20	3.01592	1.22185	1.79407	DES (5.3)	ENO3 (3.8)	PDLIM5 (3.7)	TTN (3.4)	MYH7 (3.4)	CAV1 (3.2)	DPT (3.2)	LDB3 (3.2)	SRL (3.1)	SYNPO2L (2.9)
ENSG00000183741	CBX6 PPI subnetwork	0.000967	0.19	<0.20	3.01457	0.721246	2.29333	TFAP4 (4.1)	ARID2 (3.6)	TELO2 (3.2)	MARK3 (3.1)	PABPN1 (3.0)	LDB1 (2.9)	SSBP3 (2.9)	TOB2 (2.8)	ZNF358 (2.7)	HPS6 (2.7)
ENSG00000164683	HEY1 PPI subnetwork	0.00098	0.00544	<0.20	3.00877	2.2644	0.744373	PITX3 (3.2)	ID2 (3.2)	KCNK7 (2.9)	ZNF592 (2.9)	ENSG00000237125 (2.7)	TBX20 (2.6)	ALPK3 (2.6)	PPAPDC3 (2.6)	OSBPL6 (2.6)	PKLR (2.5)
ENSG00000169031	COL4A3 PPI subnetwork	0.000989	0.06	<0.20	3.0048	1.22185	1.78295	DPT (4.9)	LAMB2 (4.3)	FNDC3B (3.8)	GJA1 (3.7)	CAV1 (3.4)	CDH2 (3.4)	FKBP7 (3.3)	DAG1 (3.3)	SESTD1 (3.2)	CDADC1 (3.1)
ENSG00000163346	PBXIP1 PPI subnetwork	0.000995	0.03	<0.20	3.00218	1.52288	1.4793	MACF1 (3.2)	NCKIPSD (3.1)	EP300 (3.1)	CLOCK (3.0)	FBXO11 (2.9)	ZNF592 (2.9)	XPC (2.9)	NSRP1 (2.7)	ARID2 (2.7)	USP19 (2.7)
ENSG00000204209	DAXX PPI subnetwork	0.00101	0.00243	<0.20	2.99568	2.61439	0.381285	CDKN1A (4.0)	C6orf204 (3.3)	QRICH1 (3.0)	PARP10 (2.9)	SYNE2 (2.9)	IRX3 (2.8)	USP19 (2.6)	EIF2C2 (2.5)	PARP8 (2.5)	RNF11 (2.4)
ENSG00000206206	DAXX PPI subnetwork	0.00101	0.00243	<0.20	2.99568	2.61439	0.381285	CDKN1A (4.0)	C6orf204 (3.3)	QRICH1 (3.0)	PARP10 (2.9)	SYNE2 (2.9)	IRX3 (2.8)	USP19 (2.6)	EIF2C2 (2.5)	PARP8 (2.5)	RNF11 (2.4)
ENSG00000206279	DAXX PPI subnetwork	0.00101	0.00243	<0.20	2.99568	2.61439	0.381285	CDKN1A (4.0)	C6orf204 (3.3)	QRICH1 (3.0)	PARP10 (2.9)	SYNE2 (2.9)	IRX3 (2.8)	USP19 (2.6)	EIF2C2 (2.5)	PARP8 (2.5)	RNF11 (2.4)
ENSG00000147162	OGT PPI subnetwork	0.00101	0.21	<0.20	2.99568	0.677781	2.3179	CSNK1G1 (4.3)	AFF1 (3.2)	EP300 (3.0)	SCAND2 (2.9)	MAP3K11 (2.9)	KDM1B (2.8)	LDB1 (2.7)	ACVR2B (2.6)	QRICH1 (2.6)	ZNF609 (2.6)
KEGG pathways
KEGG_REGULATION_OF_ACTIN_CYTOSKELETON	KEGG_REGULATION_OF_ACTIN_CYTOSKELETON	3.89e-09	0.000215	<0.05	8.41005	3.66756	4.74249	SH3BGRL3 (4.2)	PDLIM5 (4.1)	CTDSPL (4.0)	MACF1 (3.5)	FERMT2 (3.5)	FHL2 (3.3)	RBPMS2 (3.2)	PHLDB2 (3.2)	ITGB1 (3.1)	PFN1 (3.1)
KEGG_HYPERTROPHIC_CARDIOMYOPATHY_HCM	KEGG_HYPERTROPHIC_CARDIOMYOPATHY_HCM	9.08e-09	0.000917	<0.05	8.04191	3.03763	5.00428	SYNPO2L (8.1)	MYH7 (8.0)	MYH6 (8.0)	LDB3 (7.8)	CEFIP (7.7)	XIRP1 (7.7)	ADPRHL1 (7.0)	PLN (6.8)	TTN (6.5)	SRL (6.3)
KEGG_DILATED_CARDIOMYOPATHY	KEGG_DILATED_CARDIOMYOPATHY	2.16e-08	0.00152	<0.20	7.66555	2.81816	4.84739	MYH6 (8.1)	MYH7 (7.8)	SYNPO2L (7.8)	LDB3 (7.4)	CEFIP (7.1)	XIRP1 (7.1)	ADPRHL1 (7.0)	PLN (6.5)	SRL (6.1)	TTN (6.0)
KEGG_PATHWAYS_IN_CANCER	KEGG_PATHWAYS_IN_CANCER	6.29e-08	0.00284	<0.20	7.20135	2.54668	4.65467	FNDC3B (3.6)	MSX2 (3.6)	RAP2B (3.2)	EMILIN3 (3.1)	ZNF503 (3.0)	BMPR1A (3.0)	ARHGEF40 (2.9)	DAG1 (2.9)	FGFR1 (2.8)	PDZRN3 (2.8)
KEGG_TIGHT_JUNCTION	KEGG_TIGHT_JUNCTION	8.85e-08	0.01	<0.20	7.05306	2	5.05306	MYOZ1 (5.2)	TTN (5.1)	SRL (5.0)	TRDN (4.6)	ENO3 (4.3)	SYNPO2L (4.3)	LDB3 (4.1)	CRYAB (4.1)	FREM2 (3.8)	DES (3.8)
KEGG_FOCAL_ADHESION	KEGG_FOCAL_ADHESION	2.48e-07	0.00481	<0.20	6.60555	2.31785	4.28769	HSPG2 (5.6)	TMEM204 (4.8)	CAV1 (4.6)	ITGB1 (4.4)	CAV2 (3.8)	PLEC (3.8)	FERMT2 (3.7)	ITGAV (3.3)	GJA1 (3.3)	PODXL (3.2)
KEGG_ARRHYTHMOGENIC_RIGHT_VENTRICULAR_CARDIOMYOPATHY_ARVC	KEGG_ARRHYTHMOGENIC_RIGHT_VENTRICULAR_CARDIOMYOPATHY_ARVC	1.95e-06	0.00264	<0.20	5.70997	2.5784	3.13157	DSP (4.9)	SPEG (4.9)	XIRP1 (4.7)	SORBS1 (4.7)	AKAP6 (4.7)	CEFIP (4.6)	PDLIM5 (4.6)	ADCY5 (4.5)	CORO6 (4.3)	PLN (4.2)
KEGG_LEUKOCYTE_TRANSENDOTHELIAL_MIGRATION	KEGG_LEUKOCYTE_TRANSENDOTHELIAL_MIGRATION	7.08e-06	0.03	<0.20	5.14997	1.52288	3.62709	CD52 (4.0)	PODXL (3.3)	SH3BGRL3 (3.2)	TMEM204 (2.9)	MUC1 (2.9)	SRL (2.8)	NCK2 (2.8)	SEPT7 (2.7)	ITGB1 (2.7)	VEPH1 (2.6)
KEGG_WNT_SIGNALING_PATHWAY	KEGG_WNT_SIGNALING_PATHWAY	1.37e-05	0.00752	<0.20	4.86328	2.12378	2.7395	NKD2 (4.6)	MSX2 (3.8)	BMPR1A (3.7)	FGFR1 (3.6)	PDZRN3 (3.3)	SKI (3.1)	NCK2 (3.1)	DLG1 (2.9)	FGF18 (2.9)	TBX3 (2.8)
KEGG_CARDIAC_MUSCLE_CONTRACTION	KEGG_CARDIAC_MUSCLE_CONTRACTION	1.4e-05	0.0043	<0.20	4.85387	2.36653	2.48734	MYH7 (8.0)	MYH6 (7.3)	SYNPO2L (7.1)	LDB3 (6.9)	TTN (6.9)	ADPRHL1 (6.3)	XIRP1 (6.2)	CEFIP (6.2)	ENO3 (6.1)	SRL (6.0)
KEGG_MAPK_SIGNALING_PATHWAY	KEGG_MAPK_SIGNALING_PATHWAY	1.74e-05	0.07	<0.20	4.75945	1.1549	3.60455	CSRNP1 (4.8)	NFKBIA (3.6)	CCNL1 (3.3)	NEURL (3.0)	MAP7D1 (2.9)	DOK2 (2.9)	TEF (2.9)	SBNO2 (2.7)	DTNA (2.6)	DLC1 (2.6)
KEGG_VASCULAR_SMOOTH_MUSCLE_CONTRACTION	KEGG_VASCULAR_SMOOTH_MUSCLE_CONTRACTION	2.81e-05	0.01	<0.20	4.55129	2	2.55129	MYOCD (7.4)	SPEG (6.3)	DES (5.3)	TCF21 (5.1)	PLN (5.0)	PDE3A (4.7)	RBPMS (4.3)	ADCY5 (4.3)	TMEM204 (4.2)	RAP1A (4.1)
KEGG_MELANOMA	KEGG_MELANOMA	0.000106	0.25	<0.20	3.97469	0.60206	3.37263	RAP2B (3.7)	SCN5A (3.4)	C1orf183 (3.4)	PRRX1 (3.2)	CHRM2 (3.2)	CDKN1A (3.0)	MSX2 (3.0)	EMB (2.6)	NAV2 (2.6)	WNT11 (2.6)
KEGG_ADHERENS_JUNCTION	KEGG_ADHERENS_JUNCTION	0.000141	0.00309	<0.20	3.85078	2.51004	1.34074	FERMT2 (4.8)	PHLDB2 (4.5)	FAT1 (4.1)	CTDSPL (3.9)	CTTNBP2NL (3.7)	PDLIM5 (3.5)	EPAS1 (3.4)	SPTBN1 (3.4)	DAG1 (3.2)	PTK2 (3.2)
KEGG_MELANOGENESIS	KEGG_MELANOGENESIS	0.000161	0.02	<0.20	3.79317	1.69897	2.0942	RAB3B (3.4)	PDZRN3 (3.3)	NKD2 (3.2)	KCNK7 (3.0)	EDN2 (2.8)	EPM2AIP1 (2.7)	C5orf13 (2.7)	FGF5 (2.6)	FGFR2 (2.5)	SSBP3 (2.4)
KEGG_TGF_BETA_SIGNALING_PATHWAY	KEGG_TGF_BETA_SIGNALING_PATHWAY	0.000427	0.04	<0.20	3.36957	1.39794	1.97163	ID2 (7.1)	WNT11 (5.2)	BMPR1A (3.8)	CRIM1 (3.7)	CRLF1 (3.6)	SKI (3.6)	FLRT2 (3.4)	FERMT2 (3.3)	ADAMTSL3 (3.3)	NR3C1 (3.2)
KEGG_INSULIN_SIGNALING_PATHWAY	KEGG_INSULIN_SIGNALING_PATHWAY	0.000637	0.12	<0.20	3.19586	0.920819	2.27504	SORT1 (3.5)	ARIH2 (3.4)	TRAK1 (3.2)	PRKAB2 (3.0)	DTNA (3.0)	MAP3K3 (3.0)	SBNO2 (2.9)	CAMK2G (2.8)	KLHL26 (2.6)	SORBS1 (2.6)
REACTOME pathways
REACTOME_MUSCLE_CONTRACTION	REACTOME_MUSCLE_CONTRACTION	1.27e-06	0.000299	<0.05	5.8962	3.52433	2.37187	MYOZ1 (10.4)	TTN (10.1)	TRDN (10.0)	DES (9.9)	LDB3 (9.3)	MYH7 (9.0)	ENO3 (8.9)	SRL (8.7)	SYNPO2L (8.5)	CEFIP (7.2)
REACTOME_AXON_GUIDANCE	REACTOME_AXON_GUIDANCE	1.15e-05	0.000664	<0.05	4.9393	3.17783	1.76147	LPHN3 (4.0)	HSPG2 (3.9)	MACF1 (3.8)	FERMT2 (3.7)	CDC42BPA (3.6)	COL13A1 (3.2)	OSBPL6 (3.0)	ITGB1 (3.0)	SRGAP1 (3.0)	TAGLN3 (2.9)
REACTOME_DEVELOPMENTAL_BIOLOGY	REACTOME_DEVELOPMENTAL_BIOLOGY	1.57e-05	0.00216	<0.20	4.8041	2.66555	2.13855	FERMT2 (3.4)	HSPG2 (3.3)	MACF1 (3.2)	CDC42BPA (3.1)	LPHN3 (3.1)	DAG1 (2.9)	MAP7D1 (2.9)	FGF5 (2.8)	ZMIZ1 (2.8)	PLEC (2.8)
REACTOME_SMOOTH_MUSCLE_CONTRACTION	REACTOME_SMOOTH_MUSCLE_CONTRACTION	1.86e-05	0.00282	<0.20	4.73049	2.54975	2.18074	DES (8.1)	MYOCD (7.7)	SPEG (7.1)	PLN (7.0)	FERMT2 (6.2)	RBPMS (6.0)	RBPMS2 (5.6)	SORBS1 (5.0)	CAV1 (4.6)	CAMK2G (4.1)
REACTOME_PI:3K_CASCADE	REACTOME_PI:3K_CASCADE	4.52e-05	0.06	<0.20	4.34486	1.22185	3.12301	WNT11 (4.5)	C5orf41 (4.1)	MSX2 (3.7)	CLOCK (3.4)	FAM59A (3.3)	ARID2 (3.3)	MAP3K3 (3.2)	DLG1 (3.1)	SPTBN1 (3.1)	DLC1 (3.1)
REACTOME_PI3K_CASCADE	REACTOME_PI3K_CASCADE	6.26e-05	0.02	<0.20	4.20343	1.69897	2.50446	WNT11 (3.9)	SORBS1 (3.7)	CCBE1 (3.6)	MSX2 (2.8)	TEF (2.7)	FGFR1 (2.7)	AFF1 (2.6)	TACO1 (2.6)	SPSB3 (2.5)	CLCN7 (2.5)
REACTOME_SEMA4D_IN_SEMAPHORIN_SIGNALING	REACTOME_SEMA4D_IN_SEMAPHORIN_SIGNALING	8.42e-05	0.000534	<0.05	4.07469	3.27246	0.802229	MACF1 (3.8)	MYOCD (3.7)	FERMT2 (3.7)	HSPG2 (3.6)	TCTA (3.4)	FAT1 (3.3)	PFN1 (3.2)	CDC42BPA (3.2)	SEPT7 (3.2)	ITGB1 (3.2)
REACTOME_SEMA4D_INDUCED_CELL_MIGRATION_AND_GROWTH:CONE_COLLAPSE	REACTOME_SEMA4D_INDUCED_CELL_MIGRATION_AND_GROWTH:CONE_COLLAPSE	8.53e-05	0.00029	<0.05	4.06905	3.5376	0.531449	MYOCD (3.9)	HSPG2 (3.7)	SEPT7 (3.7)	FERMT2 (3.6)	PFN1 (3.6)	TCTA (3.5)	MACF1 (3.4)	CDC42BPA (3.3)	LAMB2 (3.2)	FHL2 (3.0)
REACTOME_CELL:EXTRACELLULAR_MATRIX_INTERACTIONS	REACTOME_CELL:EXTRACELLULAR_MATRIX_INTERACTIONS	0.000118	0.00842	<0.20	3.92812	2.07469	1.85343	RBPMS2 (6.0)	RBPMS (5.8)	SPEG (5.5)	TES (5.1)	MYOCD (4.5)	DES (4.4)	FERMT2 (4.3)	FHL2 (4.1)	ITGB1 (3.9)	SORBS1 (3.8)
REACTOME_NETRIN:1_SIGNALING	REACTOME_NETRIN:1_SIGNALING	0.000153	0.02	<0.20	3.81531	1.69897	2.11634	SRGAP1 (3.8)	CDC42BPA (3.7)	ST7-AS1 (3.4)	RAP2B (3.3)	LRIG1 (3.1)	TMEM204 (3.1)	LPHN3 (2.9)	COL13A1 (2.8)	FERMT2 (2.8)	PRKCA (2.8)
REACTOME_SEMAPHORIN_INTERACTIONS	REACTOME_SEMAPHORIN_INTERACTIONS	0.000166	0.0017	<0.20	3.77989	2.76955	1.01034	CTTNBP2NL (4.3)	MACF1 (4.0)	FERMT2 (3.6)	SH3BGRL3 (3.4)	MYOCD (3.3)	TES (3.3)	ZMIZ1 (3.2)	RAP1A (3.2)	SEPT7 (3.1)	ITGB1 (3.1)
REACTOME_REGULATION_OF_AMPK_ACTIVITY_VIA_LKB1	REACTOME_REGULATION_OF_AMPK_ACTIVITY_VIA_LKB1	0.000188	0.12	<0.20	3.72584	0.920819	2.80502	CAMK2G (3.8)	SPSB3 (3.1)	RIC8B (3.0)	TACO1 (3.0)	UBE3B (2.8)	AMIGO1 (2.7)	PRKCA (2.7)	ARIH2 (2.6)	FIGN (2.5)	ADAMTSL3 (2.5)
REACTOME_INSULIN_RECEPTOR_SIGNALLING_CASCADE	REACTOME_INSULIN_RECEPTOR_SIGNALLING_CASCADE	0.000197	0.09	<0.20	3.70553	1.04576	2.65978	CCBE1 (4.0)	WNT11 (3.8)	SORBS1 (3.0)	TEF (2.7)	DLG1 (2.7)	DLC1 (2.6)	SENP2 (2.6)	SPSB3 (2.5)	CTDSPL (2.5)	MAP3K3 (2.5)
REACTOME_ENERGY_DEPENDENT_REGULATION_OF_MTOR_BY_LKB1:AMPK	REACTOME_ENERGY_DEPENDENT_REGULATION_OF_MTOR_BY_LKB1:AMPK	0.000198	0.13	<0.20	3.70333	0.886057	2.81728	SPSB3 (3.8)	CAMK2G (3.7)	UBE3B (3.4)	PRKCA (3.2)	RIC8B (3.1)	ARIH2 (2.9)	DTNA (2.8)	MARK3 (2.8)	GORASP1 (2.7)	KLHL26 (2.6)
REACTOME_SIGNALING_BY_FGFR	REACTOME_SIGNALING_BY_FGFR	0.000264	0.21	<0.20	3.5784	0.677781	2.90062	WNT11 (4.2)	DLC1 (3.4)	SPTBN1 (3.3)	MAP3K3 (3.3)	FAM59A (3.3)	STRN (3.1)	KCNIP2 (3.1)	ZNF592 (3.0)	C5orf41 (3.0)	CRLF1 (3.0)
REACTOME_SIGNALING_BY_TGF_BETA	REACTOME_SIGNALING_BY_TGF_BETA	0.000355	0.00778	<0.20	3.44977	2.10902	1.34075	SKI (5.1)	ID2 (4.7)	MAP3K3 (3.6)	ZFPM1 (3.4)	ZMIZ1 (3.3)	ZNF592 (3.0)	WNT11 (3.0)	CX3CR1 (2.9)	CALHM2 (2.8)	PRKAB2 (2.8)
REACTOME_STRIATED_MUSCLE_CONTRACTION	REACTOME_STRIATED_MUSCLE_CONTRACTION	0.000364	0.00926	<0.20	3.4389	2.03339	1.40551	TTN (12.3)	MYOZ1 (11.6)	TRDN (11.4)	MYH7 (10.6)	ENO3 (10.2)	SYNPO2L (9.9)	LDB3 (9.7)	SRL (9.6)	CEFIP (8.3)	XIRP1 (7.6)
REACTOME_INTEGRIN_CELL_SURFACE_INTERACTIONS	REACTOME_INTEGRIN_CELL_SURFACE_INTERACTIONS	0.000432	0.15	<0.20	3.36452	0.823909	2.54061	HSPG2 (5.3)	GJA1 (4.4)	TMEM204 (4.3)	PHLDB2 (4.1)	ITGB1 (3.7)	RBPMS (3.5)	DAG1 (3.2)	ITGAV (3.2)	RBPMS2 (3.2)	CD52 (3.1)
REACTOME_NEGATIVE_REGULATION_OF_FGFR_SIGNALING	REACTOME_NEGATIVE_REGULATION_OF_FGFR_SIGNALING	0.000447	0.00931	<0.20	3.34969	2.03105	1.31864	WNT11 (5.7)	MSX2 (4.3)	DLC1 (4.1)	CCBE1 (3.8)	FGFR1 (3.6)	C11orf9 (3.1)	FGF18 (3.0)	ENSG00000238018 (2.7)	KCNIP2 (2.7)	FREM2 (2.5)
REACTOME_IRS:MEDIATED_SIGNALLING	REACTOME_IRS:MEDIATED_SIGNALLING	0.000499	0.13	<0.20	3.3019	0.886057	2.41584	WNT11 (4.0)	CCBE1 (3.9)	SORBS1 (3.2)	TEF (2.9)	MAP3K3 (2.8)	SPSB3 (2.7)	C16orf42 (2.6)	DLG1 (2.6)	KCNIP2 (2.5)	FREM2 (2.5)
REACTOME_IRS:RELATED_EVENTS	REACTOME_IRS:RELATED_EVENTS	0.000499	0.13	<0.20	3.3019	0.886057	2.41584	WNT11 (4.0)	CCBE1 (3.9)	SORBS1 (3.2)	TEF (2.9)	MAP3K3 (2.8)	SPSB3 (2.7)	C16orf42 (2.6)	DLG1 (2.6)	KCNIP2 (2.5)	FREM2 (2.5)
REACTOME_DOWNSTREAM_SIGNALING_OF_ACTIVATED_FGFR	REACTOME_DOWNSTREAM_SIGNALING_OF_ACTIVATED_FGFR	0.000827	0.33	<0.20	3.08249	0.481486	2.60101	WNT11 (4.0)	KCNIP2 (3.3)	CLOCK (3.3)	MAP3K3 (3.2)	SPTBN1 (3.2)	C5orf41 (3.2)	CRLF1 (3.2)	DLG1 (3.1)	DLC1 (3.1)	STRN (3.0)
REACTOME_FACTORS_INVOLVED_IN_MEGAKARYOCYTE_DEVELOPMENT_AND_PLATELET_PRODUCTION	REACTOME_FACTORS_INVOLVED_IN_MEGAKARYOCYTE_DEVELOPMENT_AND_PLATELET_PRODUCTION	0.000928	0.2	<0.20	3.03245	0.69897	2.33348	ENSG00000249700 (3.9)	ENSG00000182873 (3.4)	CDKN2C (3.0)	ST7-AS1 (2.9)	SIPA1L2 (2.8)	TBX3 (2.7)	GP1BA (2.7)	ZFPM1 (2.6)	CTTNBP2NL (2.4)	NICN1 (2.4)
REACTOME_PKB:MEDIATED_EVENTS	REACTOME_PKB:MEDIATED_EVENTS	0.00105	0.13	<0.20	2.97881	0.886057	2.09275	ARIH2 (3.9)	TACO1 (3.6)	SPSB3 (3.6)	CAMK2G (3.3)	DTNA (3.3)	UBE3B (3.2)	CLCN7 (3.2)	MRPS34 (2.9)	GORASP1 (2.9)	KPNA3 (2.7)
