# Supplementary material for: Multi-ancestry GWAS of the electrocardiographic PR interval identifies 202 loci underlying cardiac conduction
Source: Nat Commun. 2020 May 21;11:2542. doi: 10.1038/s41467-020-15706-x (PMC7242331; doi:10.1038/s41467-020-15706-x)
Supplement: Supplementary file 25 — Supplementary Data 22 [file 41467_2020_15706_MOESM25_ESM.xlsx]

## Sheet: SD22 IPA
Supplementary Data 22 Results from the Ingenuity Pathway Analysis.
A total of 593 genes from PR interval loci were selected for Ingenuity pathways analysis. Genes were selected if they (i) were located in regions defined by r2>0.5 with the lead or conditionally independent variants for all PR interval loci, (ii) were nearest gene to the lead variant, or (iii) were indicated by gene expression analyses.
Shown are enrichment P-values for the corresponding Ingenuity canonical pathway and the proteins involved in the respective pathway. P-values are derived from Fisher's exact test. Canonical pathways showing enrichment at 5% FDR were considered significant and are presented. Molecules list proteins in PR interval loci (bold: previously not reported loci, non-bold: previously reported loci) involve…
	Previously reported and not reported loci		Previously reported loci
Ingenuity Canonical Pathways	P	FDR	P	FDR	Molecules
Role of NFAT in Cardiac Hypertrophy	7.76247e-05	<1%	0.000288403	<5%	FGFR2,ADCY5,RCAN2,PRKCA,CACNA1G,RAP2B,PRKAR2A,FGFR1,PLCD1,CAMK2G,NKX2-5,SLC8A1,CAMK2D,PLCG1,CACNA1D
Actin Cytoskeleton Signaling	0.0001	<1%	0.0288403	NS	FGFR2,FGF5,FGF12,FGF18,PTK2,RHOA,MYH11,FGF14,RAP2B,SSH2,FGFR1,MYH7,ARHGAP24,TTN,MYH6
Calcium Signaling	0.000104713	<1%	0.000870964	NS	CHRNE,RCAN2,MYH11,RAP2B,CACNA1D,RYR2,PRKAR2A,MYH7,TRDN,CAMK2G,SLC8A1,CAMK2D,MYH6,CACNA1D
Gap Junction Signaling	0.000114815	<1%	0.0194984	NS	FGFR1,GJA5,ADCY5,ADRB1,NPR3,PRKCA,RAP2B,CSNK1G1,PRKAR2A,FGFR1,PLCD1,CAV1,PLCG1,GJA1
Factors Promoting Cardiogenesis in Vertebrates	0.000120226	<1%	6.30957e-05	<5%	BMPR1A,BMPR2,PRKCA,BMP8A,WNT11,MYH7,TBX5,NKX2-5,ACVR2B
PPARα/RXRα Activation	0.000138038	<1%	0.0501187	NS	ADCY5,GH1,NFKBIA,BMPR2,PRKCA,NR2F1,RAP2B,PRKAB2,PRKAR2A,PLCD1,PPARGC1A,PLCG1,ACVR2B
AMPK Signaling	0.000199526	<5%	0.483059	NS	FGFR2,STRADA,CHRNE,ADRB1,SMARCD2,CHRM2,SMARCB1,STK11,ARID2,CDKN1A,PRKAB2,PRKAR2A,FGFR1,PPARGC1A
Regulation of the Epithelial-Mesenchymal Transition Pathway	0.000245471	<5%	0.0588844	NS	FGFR2,FGF5,CDH2,FGF12,FGF18,RHOA,FGF14,RAP2B,HMGA2,WNT11,FGFR1,ID2,WNT3A
Epithelial Adherens Junction Signaling	0.000275423	<5%	0.00512861	NS	BMPR2,CDH2,MYH11,FER,RAP2B,RHOA,FGFR1,MYH7,SORBS1,MYH6,ACVR2B
Growth Hormone Signaling	0.00040738	<5%	0.133352	NS	GH2,FGFR2,PRKCA,CSH1/CSH2,GH1,CSHL1,FGFR1,PLCG1
FGF Signaling	0.000630957	<5%	0.148594	NS	FGFR2,FGF5,FGF12,PRKCA,FGF14,FGF18,FGFR1,PLCG1
Nitric Oxide Signaling in the Cardiovascular System	0.000645654	<5%	0.0104713	NS	FGFR2,PRKCA,ADRB1,RYR2,PRKAR2A,FGFR1,PLN,CAV1,CACNA1D
Cardiomyocyte Differentiation via BMP Receptors	0.000676083	<5%	0.00954993	NS	BMPR1A,BMPR2,MYH7,NKX2-5
GPCR-Mediated Integration of Enteroendocrine Signaling Exemplified by an L Cell	0.000776247	<5%	0.101859	NS	NMB,ADCY5,ADRB1,CHRM2,PRKAR2A,PLCD1,PLCG1
Glioma Signaling	0.000977237	<5%	0.00213796	NS	FGFR2,PRKCA,CDKN1A,RAP2B,FGFR1,CDKN2C,CAMK2G,CAMK2D,PLCG1
Chemokine Signaling	0.00107152	<5%	0.0194984	NS	PRKCA,RAP2B,PTK2,RHOA,CAMK2G,CAMK2D,PLCG1
Molecular Mechanisms of Cancer	0.00151356	<5%	0.0275423	NS	FGFR2,ADCY5,PTK2,NFKBIA,RHOA,BMPR1A,BMPR2,PRKCA,CDKN1A,RAP2B,PRKAR2A,BMP8A,WNT11,FGFR1,CDKN2C,CAMK2G,CAMK2D,WNT3A
Cellular Effects of Sildenafil (Viagra)	0.00162181	<5%	0.00295121	NS	ADCY5,MYH11,PDE3A,MYH6,PRKAR2A,PLCD1,MYH7,PLCG1,MYH6,CACNA1D
Cardiac Hypertrophy Signaling	0.00165959	<5%	0.00933254	NS	FGFR2,ADCY5,ADRB1,RHOA,RAP2B,MAP3K3,PRKAR2A,FGFR1,PLCD1,NKX2-5,PLCG1,HAND2,CACNA1D
CREB Signaling in Neurons	0.0020893	<5%	0.00588844	NS	FGFR2,PRKCA,ADCY5,CACNA1G,RAP2B,PRKAR2A,FGFR1,PLCD1,CAMK2G,CAMK2D,PLCG1,CACNA1D
Leptin Signaling in Obesity	0.00229087	<5%	0.0275423	NS	FGFR2,ADCY5,PDE3A,PRKAR2A,FGFR1,PLCD1,PLCG1
Cardiac β-adrenergic Signaling	0.0025704	<5%	0.0851138	NS	ADCY5,ADRB1,PDE3A,AKAP6,RYR2,PRKAR2A,PLN,SLC8A1,CACNA1D
PKCθ Signaling in T Lymphocytes	0.0025704	<5%	0.00812831	NS	FGFR2,CACNA1G,RAP2B,NFKBIA,MAP3K3,FGFR1,CAMK2G,CAMK2D,PLCG1,CACNA1D
GNRH Signaling	0.00288403	<5%	0.13213	NS	PRKCA,ADCY5,CACNA1G,RAP2B,PTK2,MAP3K3,PRKAR2A,CAMK2G,CAMK2D,CACNA1D
Neuropathic Pain Signaling In Dorsal Horn Neurons	0.00301995	<5%	0.00177828	NS	FGFR2,PRKCA,PRKAR2A,FGFR1,PLCD1,CAMK2G,CAMK2D,PLCG1
Bladder Cancer Signaling	0.00331131	<5%	-	-	FGF5,FGF12,MMP11,CDKN1A,FGF14,RAP2B,FGF18
G Beta Gamma Signaling	0.00331131	<5%	0.011749	NS	PRKCA,RAP2B,CACNA1D,PRKAR2A,CAV1,CAV2,PLCG1,CACNA1D
eNOS Signaling	0.00338844	<5%	0.138676	NS	FGFR2,PRKCA,CHRNE,ADCY5,CHRM2,PRKAB2,PRKAR2A,FGFR1,CAV1,PLCG1
Melatonin Signaling	0.00371535	<5%	0.00199526	NS	PRKCA,PRKAR2A,PLCD1,CAMK2G,CAMK2D,PLCG1
HGF Signaling	0.00371535	<5%	0.225424	NS	FGFR2,PRKCA,CDKN1A,RAP2B,PTK2,MAP3K3,FGFR1,PLCG1
PTEN Signaling	0.0040738	<5%	0.231206	NS	FGFR2,BMPR1A,BMPR2,CDKN1A,RAP2B,PTK2,FGFR1,SHARPIN
