# Supplementary material for: Multi-ancestry GWAS of the electrocardiographic PR interval identifies 202 loci underlying cardiac conduction
Source: Nat Commun. 2020 May 21;11:2542. doi: 10.1038/s41467-020-15706-x (PMC7242331; doi:10.1038/s41467-020-15706-x)
Supplement: Supplementary file 26 — Supplementary Data 23 [file 41467_2020_15706_MOESM26_ESM.xlsx]

## Sheet: SD23 Disease definition in UKB
Supplementary Data 23 Disease definitions in UK Biobank.
Phenotype	Field.name	Include	Exclude
Atrial fibrillation	Non-cancer illness code, self-reported	Atrial fibrillation,Atrial flutter
Atrial fibrillation	Diagnoses - main ICD9	Atrial fibrillation and flutter
Atrial fibrillation	Diagnoses - main ICD10	Atrial fibrillation and flutter,Paroxysmal atrial fibrillation,Persistent atrial fibrillation,Chronic atrial fibrillation,Typical atrial flutter,Atypical atrial flutter,Atrial fibrillation and atrial flutter, unspecified
Atrial fibrillation	Diagnoses - secondary ICD9	Atrial fibrillation and flutter
Atrial fibrillation	Diagnoses - secondary ICD10	Atrial fibrillation and flutter,Paroxysmal atrial fibrillation,Persistent atrial fibrillation,Chronic atrial fibrillation,Typical atrial flutter,Atypical atrial flutter,Atrial fibrillation and atrial flutter, unspecified
Atrial fibrillation	Operation code, self-reported	Cardioversion
Atrial fibrillation	Operative procedures - main OPCS	Percutaneous transluminal ablation of atrioventricular node,Percutaneous transluminal ablation of pulmonary vein to left atrium conducting system,Percutaneous transluminal ablation of atrial wall for atrial flutter,Percutaneous transluminal ablation of conducting system of heart for atrial flutter NEC,Percutaneous transluminal internal cardioversion NEC,Direct current cardioversion,External cardi…
Atrial fibrillation	Operative procedures - secondary OPCS	Percutaneous transluminal ablation of atrioventricular node,Percutaneous transluminal ablation of pulmonary vein to left atrium conducting system,Percutaneous transluminal ablation of atrial wall for atrial flutter,Percutaneous transluminal ablation of conducting system of heart for atrial flutter NEC,Percutaneous transluminal internal cardioversion NEC,Direct current cardioversion,External cardi…
Atrial fibrillation	Underlying (primary) cause of death: ICD10	Atrial fibrillation and flutter,Paroxysmal atrial fibrillation,Persistent atrial fibrillation,Chronic atrial fibrillation,Typical atrial flutter,Atypical atrial flutter,Atrial fibrillation and atrial flutter, unspecified
Atrial fibrillation	Contributory (secondary) causes of death: ICD10	Atrial fibrillation and flutter,Paroxysmal atrial fibrillation,Persistent atrial fibrillation,Chronic atrial fibrillation,Typical atrial flutter,Atypical atrial flutter,Atrial fibrillation and atrial flutter, unspecified
Atrial septal defect / patent foramen ovale	Diagnoses - main ICD9	Ostium secundum type atrial septal defect (unspecified)
Atrial septal defect / patent foramen ovale	Diagnoses - secondary ICD9	Ostium secundum type atrial septal defect (unspecified)
Atrial septal defect / patent foramen ovale	Diagnoses - main ICD10	Atrial septal defect,Atrioventricular septal defect
Atrial septal defect / patent foramen ovale	Diagnoses - secondary ICD10	Atrial septal defect,Atrioventricular septal defect
Atrial septal defect / patent foramen ovale	Operative procedures - main OPCS	Repair of defect of atrioventricular septum using dual prosthetic patches1,Repair of defect of atrioventricular septum using prosthetic patch NEC3,Repair of defect of atrioventricular septum using tissue graft1,Primary repair of defect of atrioventricular septum NEC3,Unspecified repair of defect of atrioventricular septum,Repair of defect of interatrial septum using prosthetic patch,Repair of def…
Atrial septal defect / patent foramen ovale	Operative procedures - secondary OPCS	Repair of defect of atrioventricular septum using dual prosthetic patches1,Repair of defect of atrioventricular septum using prosthetic patch NEC3,Repair of defect of atrioventricular septum using tissue graft1,Primary repair of defect of atrioventricular septum NEC3,Unspecified repair of defect of atrioventricular septum,Repair of defect of interatrial septum using prosthetic patch,Repair of def…
Atrial septal defect / patent foramen ovale	Underlying (primary) cause of death: ICD10	Atrial septal defect,Atrioventricular septal defect
Atrial septal defect / patent foramen ovale	Contributory (secondary) causes of death: ICD10	Atrial septal defect,Atrioventricular septal defect
Distal conduction disease	Contributory (secondary) causes of death: ICD10	Atrioventricular and left bundle-branch block,Atrioventricular block, first degree,Atrioventricular block, second degree,Atrioventricular block, complete,Other and unspecified atrioventricular block,Left anterior fascicular block,Left posterior fascicular block,Other and unspecified fascicular block,Left bundle-branch block, unspecified,Right fascicular block,Other and unspecified right bundle-br…	Rheumatic mitral valve diseases,Mitral stenosis,Mitral stenosis,Rheumatic mitral insufficiency,Rheumatic mitral insufficiency,Mitral stenosis with insufficiency,Mitral stenosis with insufficiency,Other mitral valve diseases,Mitral valve disease, unspecified,Rheumatic aortic valve diseases,Rheumatic aortic stenosis,Rheumatic aortic stenosis,Rheumatic aortic insufficiency,Rheumatic aortic insuffici…
Distal conduction disease	Diagnoses - main ICD10	Atrioventricular and left bundle-branch block,Atrioventricular block, first degree,Atrioventricular block, second degree,Atrioventricular block, complete,Other and unspecified atrioventricular block,Left anterior fascicular block,Left posterior fascicular block,Other and unspecified fascicular block,Left bundle-branch block, unspecified,Right fascicular block,Other and unspecified right bundle-br…	Rheumatic mitral valve diseases,Mitral stenosis,Mitral stenosis,Rheumatic mitral insufficiency,Rheumatic mitral insufficiency,Mitral stenosis with insufficiency,Mitral stenosis with insufficiency,Other mitral valve diseases,Mitral valve disease, unspecified,Rheumatic aortic valve diseases,Rheumatic aortic stenosis,Rheumatic aortic stenosis,Rheumatic aortic insufficiency,Rheumatic aortic insuffici…
Distal conduction disease	Diagnoses - main ICD9	Atrioventricular block, complete,Atrioventricular block, other and unspecified,Other left bundle branch block,Right bundle branch block,Bundle branch block, unspecified,Other specified heart block	Mitral stenosis,Mitral stenosis,Mitral stenosis with insufficiency,Mitral stenosis with insufficiency,Mitral stenosis with insufficiency,Other and unspecified diseases of mitral valve,Rheumatic aortic insufficiency,Rheumatic aortic insufficiency,Other and unspecified diseases of aortic valve,Mitral valve disorders,Aortic valve disorders,Pulmonary valve disorders
Distal conduction disease	Diagnoses - secondary ICD10	Atrioventricular and left bundle-branch block,Atrioventricular block, first degree,Atrioventricular block, second degree,Atrioventricular block, complete,Other and unspecified atrioventricular block,Left anterior fascicular block,Left posterior fascicular block,Other and unspecified fascicular block,Left bundle-branch block, unspecified,Right fascicular block,Other and unspecified right bundle-br…	Rheumatic mitral valve diseases,Mitral stenosis,Mitral stenosis,Rheumatic mitral insufficiency,Rheumatic mitral insufficiency,Mitral stenosis with insufficiency,Mitral stenosis with insufficiency,Other mitral valve diseases,Mitral valve disease, unspecified,Rheumatic aortic valve diseases,Rheumatic aortic stenosis,Rheumatic aortic stenosis,Rheumatic aortic insufficiency,Rheumatic aortic insuffici…
Distal conduction disease	Diagnoses - secondary ICD9	Atrioventricular block, complete,Atrioventricular block, other and unspecified,Other left bundle branch block,Right bundle branch block,Bundle branch block, unspecified,Other specified heart block	Mitral stenosis,Mitral stenosis,Mitral stenosis with insufficiency,Mitral stenosis with insufficiency,Mitral stenosis with insufficiency,Other and unspecified diseases of mitral valve,Rheumatic aortic insufficiency,Rheumatic aortic insufficiency,Other and unspecified diseases of aortic valve,Mitral valve disorders,Aortic valve disorders,Pulmonary valve disorders
Distal conduction disease	Non-cancer illness code, self-reported		Heart valve problem / heart murmur,Mitral valve prolapse,Mitral stenosis,Mitral stenosis,Aortic stenosis,Aortic stenosis,Mitral valve disease,Mitral regurgitation / incompetence,Mitral regurgitation / incompetence,Aortic valve disease,Aortic regurgitation / incompetence,Aortic regurgitation / incompetence
Distal conduction disease	Operation code, self-reported		Heart valve surgery,Aortic valve repair / replacement,Mitral valve repair / replacement,Other valve repair / replacement
Distal conduction disease	Operative procedures - main OPCS		Transplantation of heart and lung,Allotransplantation of heart and lung,Other transplantation of heart,Allotransplantation of heart NEC,Implantation of prosthetic heart,Repair of tetralogy of Fallot,Repair of tetralogy of Fallot using valved right ventricular outflow conduit,Repair of tetralogy of Fallot using right ventricular outflow conduit NEC,Revision of repair of tetralogy of Fallot,Correct…
Distal conduction disease	Operative procedures - secondary OPCS		Transplantation of heart and lung,Allotransplantation of heart and lung,Other transplantation of heart,Allotransplantation of heart NEC,Implantation of prosthetic heart,Repair of tetralogy of Fallot,Repair of tetralogy of Fallot using valved right ventricular outflow conduit,Repair of tetralogy of Fallot using right ventricular outflow conduit NEC,Revision of repair of tetralogy of Fallot,Correct…
Distal conduction disease	Source of first MI		Self-report only,Hospital admission,Death only
Distal conduction disease	Underlying (primary) cause of death: ICD10	Atrioventricular and left bundle-branch block,Atrioventricular block, first degree,Atrioventricular block, second degree,Atrioventricular block, complete,Other and unspecified atrioventricular block,Left anterior fascicular block,Left posterior fascicular block,Other and unspecified fascicular block,Left bundle-branch block, unspecified,Right fascicular block,Other and unspecified right bundle-br…	Rheumatic mitral valve diseases,Mitral stenosis,Mitral stenosis,Rheumatic mitral insufficiency,Rheumatic mitral insufficiency,Mitral stenosis with insufficiency,Mitral stenosis with insufficiency,Other mitral valve diseases,Mitral valve disease, unspecified,Rheumatic aortic valve diseases,Rheumatic aortic stenosis,Rheumatic aortic stenosis,Rheumatic aortic insufficiency,Rheumatic aortic insuffici…
Atrioventricular preexcitation	Diagnoses - main ICD9	Anomalous atrioventricular excitation	Ebstein's anomaly,Hypertrophic obstructive cardiomyopathy
Atrioventricular preexcitation	Diagnoses - secondary ICD9	Anomalous atrioventricular excitation	Ebstein's anomaly,Hypertrophic obstructive cardiomyopathy
Atrioventricular preexcitation	Diagnoses - secondary ICD10	Preexcitation syndrome	Ebstein's anomaly,Obstructive hypertrophic cardiomyopathy,Other hypertrophic cardiomyopathy
Atrioventricular preexcitation	Diagnoses - main ICD10	Preexcitation syndrome	Ebstein's anomaly,Obstructive hypertrophic cardiomyopathy,Other hypertrophic cardiomyopathy
Atrioventricular preexcitation	Non-cancer illness code, self-reported	Wolff parkinson white / WPW syndrome
Atrioventricular preexcitation	Operative procedures - main OPCS	Open division of accessory pathway within heart,Percutaneous transluminal ablation of accessory pathway
Atrioventricular preexcitation	Operative procedures - secondary OPCS	Open division of accessory pathway within heart,Percutaneous transluminal ablation of accessory pathway
Atrioventricular preexcitation	Underlying (primary) cause of death: ICD10	Preexcitation syndrome
Atrioventricular preexcitation	Contributory (secondary) causes of death: ICD10	Preexcitation syndrome	Include
Congenital heart disease	Diagnosis - main ICD9	Bulbus cordis anomalies and anomalies of cardiac septal closure,Other congenital anomalies of heart,Ostium secundum type atrial septal defect,Congenital insufficiency of aortic valve,Other specified anomalies of heart,Unspecified anomalies of heart,Other specified anomalies of heart (congenital heart block),Cyanotic congenital heart disease, not otherwise speified,Unspecified anomalies of heart
Congenital heart disease	Diagnoses - secondary ICD9	Bulbus cordis anomalies and anomalies of cardiac septal closure,Other congenital anomalies of heart,Ostium secundum type atrial septal defect,Congenital insufficiency of aortic valve,Other specified anomalies of heart,Unspecified anomalies of heart,Other specified anomalies of heart (congenital heart block),Cyanotic congenital heart disease, not otherwise speified,Unspecified anomalies of heart
Congenital heart disease	Diagnoses - main ICD10	Common arterial trunk,Double outlet right ventricle,Double outlet left ventricle,Discordant ventriculoarterial connexion,Double inlet ventricle,Discordant atrioventricular connexion,Isomerism of atrial appendages,Other congenital malformations of cardiac chambers and connexions,Congenital malformation of cardiac chambers and connexions, unspecified,Congenital malformations of cardiac septa,Ventri…
Congenital heart disease	Diagnoses - secondary ICD10	Common arterial trunk,Double outlet right ventricle,Double outlet left ventricle,Discordant ventriculoarterial connexion,Double inlet ventricle,Discordant atrioventricular connexion,Isomerism of atrial appendages,Other congenital malformations of cardiac chambers and connexions,Congenital malformation of cardiac chambers and connexions, unspecified,Congenital malformations of cardiac septa,Ventri…
Congenital heart disease	Operative procedures - main OPCS	Repair of tetralogy of Fallot,Repair of tetralogy of Fallot using valved right ventricular outflow conduit,Repair of tetralogy of Fallot using right ventricular outflow conduit NEC,Revision of repair of tetralogy of Fallot,Correction of total anomalous pulmonary venous connection,Other specified correction of total anomalous pulmonary venous connection,Unspecified correction of total anomalous pu…
Congenital heart disease	Operative procedures - secondary OPCS	Repair of tetralogy of Fallot,Repair of tetralogy of Fallot using valved right ventricular outflow conduit,Repair of tetralogy of Fallot using right ventricular outflow conduit NEC,Revision of repair of tetralogy of Fallot,Correction of total anomalous pulmonary venous connection,Other specified correction of total anomalous pulmonary venous connection,Unspecified correction of total anomalous pu…
Congenital heart disease	Underlying (primary) cause of death: ICD10	Common arterial trunk,Double outlet right ventricle,Double outlet left ventricle,Discordant ventriculoarterial connexion,Double inlet ventricle,Discordant atrioventricular connexion,Isomerism of atrial appendages,Other congenital malformations of cardiac chambers and connexions,Congenital malformation of cardiac chambers and connexions, unspecified,Congenital malformations of cardiac septa,Ventri…
Congenital heart disease	Contributory (secondary) causes of death: ICD10	Common arterial trunk,Double outlet right ventricle,Double outlet left ventricle,Discordant ventriculoarterial connexion,Double inlet ventricle,Discordant atrioventricular connexion,Isomerism of atrial appendages,Other congenital malformations of cardiac chambers and connexions,Congenital malformation of cardiac chambers and connexions, unspecified,Congenital malformations of cardiac septa,Ventri…
Coronary artery disease	Non-cancer illness code, self-reported	heart attack/myocardial infarction
Coronary artery disease	Diagnoses - main ICD9	Acute myocardial infarction,Acute myocardial infarction,Other acute and subacute forms of ischaemic heart disease,Other acute and subacute forms of ischaemic heart disease,Old myocardial infarction,Old myocardial infarction,Coronary atherosclerosis,Other specified forms of chronic ischaemic heart disease,Chronic ischaemic heart disease, unspecified
Coronary artery disease	Diagnoses - secondary ICD9	Acute myocardial infarction,Acute myocardial infarction,Other acute and subacute forms of ischaemic heart disease,Other acute and subacute forms of ischaemic heart disease,Old myocardial infarction,Old myocardial infarction,Coronary atherosclerosis,Other specified forms of chronic ischaemic heart disease,Chronic ischaemic heart disease, unspecified
Coronary artery disease	Diagnoses - main ICD10	Acute myocardial infarction,Acute transmural myocardial infarction of anterior wall,Acute transmural myocardial infarction of inferior wall,Acute transmural myocardial infarction of other sites,Acute transmural myocardial infarction of unspecified site,Acute subendocardial myocardial infarction,Acute myocardial infarction, unspecified,Subsequent myocardial infarction,Subsequent myocardial infarct…
Coronary artery disease	Diagnoses - secondary ICD10	Acute myocardial infarction,Acute transmural myocardial infarction of anterior wall,Acute transmural myocardial infarction of inferior wall,Acute transmural myocardial infarction of other sites,Acute transmural myocardial infarction of unspecified site,Acute subendocardial myocardial infarction,Acute myocardial infarction, unspecified,Subsequent myocardial infarction,Subsequent myocardial infarct…
Coronary artery disease	Operation code, self-reported	coronary angioplasty (ptca) +/- stent,coronary artery bypass grafts (cabg),triple heart bypass
Coronary artery disease	Operative procedures - main OPCS	Saphenous vein graft replacement of coronary artery,Saphenous vein graft replacement of one coronary artery ,Saphenous vein graft replacement of two coronary arteries ,Saphenous vein graft replacement of three coronary arteries ,Saphenous vein graft replacement of four coronary arteries ,Other specified saphenous vein graft replacement of coronary artery,Unspecified saphenous vein graft replaceme…
Coronary artery disease	Operative procedures - secondary OPCS	Saphenous vein graft replacement of coronary artery,Saphenous vein graft replacement of one coronary artery ,Saphenous vein graft replacement of two coronary arteries ,Saphenous vein graft replacement of three coronary arteries ,Saphenous vein graft replacement of four coronary arteries ,Other specified saphenous vein graft replacement of coronary artery,Unspecified saphenous vein graft replaceme…
Coronary artery disease	Underlying (primary) cause of death: ICD10	Acute myocardial infarction,Acute transmural myocardial infarction of anterior wall,Acute transmural myocardial infarction of inferior wall,Acute transmural myocardial infarction of other sites,Acute transmural myocardial infarction of unspecified site,Acute subendocardial myocardial infarction,Acute myocardial infarction, unspecified,Subsequent myocardial infarction,Subsequent myocardial infarct…
Coronary artery disease	Contributory (secondary) causes of death: ICD10	Acute myocardial infarction,Acute transmural myocardial infarction of anterior wall,Acute transmural myocardial infarction of inferior wall,Acute transmural myocardial infarction of other sites,Acute transmural myocardial infarction of unspecified site,Acute subendocardial myocardial infarction,Acute myocardial infarction, unspecified,Subsequent myocardial infarction,Subsequent myocardial infarct…
Coronary artery disease	Vascular/heart problems diagnosed by doctor	Heart attack
Heart failure	Diagnoses - main ICD9	Other primary cardiomyopathies,Congestive heart failure,Left heart failure,Heart failure, unspecified
Heart failure	Diagnoses - secondary ICD9	Other primary cardiomyopathies,Congestive heart failure,Left heart failure,Heart failure, unspecified
Heart failure	Diagnoses - main ICD10	Hypertensive heart disease with (congestive) heart failure,Hypertensive heart and renal disease with (congestive) heart failure,Hypertensive heart and renal disease with both (congestive) heart failure and renal failure,Ischaemic cardiomyopathy,Dilated cardiomyopathy,Other restrictive cardiomyopathy,Other cardiomyopathies,Cardiomyopathy, unspecified,Heart failure,Congestive heart failure,Left ven…	Obstructive hypertrophic cardiomyopathy,Other hypertrophic cardiomyopathy
Heart failure	Diagnoses - secondary ICD10	Hypertensive heart disease with (congestive) heart failure,Hypertensive heart and renal disease with (congestive) heart failure,Hypertensive heart and renal disease with both (congestive) heart failure and renal failure,Ischaemic cardiomyopathy,Dilated cardiomyopathy,Other restrictive cardiomyopathy,Other cardiomyopathies,Cardiomyopathy, unspecified,Heart failure,Congestive heart failure,Left ven…	Obstructive hypertrophic cardiomyopathy,Other hypertrophic cardiomyopathy
Heart failure	Non-cancer illness code, self-reported	Heart failure/pulmonary odema,Cardiomyopathy	Hypertrophic cardiomyopathy (hcm / hocm)
Heart failure	Underlying (primary) cause of death: ICD10	Hypertensive heart disease with (congestive) heart failure,Hypertensive heart and renal disease with (congestive) heart failure,Hypertensive heart and renal disease with both (congestive) heart failure and renal failure,Ischaemic cardiomyopathy,Dilated cardiomyopathy,Other restrictive cardiomyopathy,Other cardiomyopathies,Cardiomyopathy, unspecified,Heart failure,Congestive heart failure,Left ven…	Obstructive hypertrophic cardiomyopathy,Other hypertrophic cardiomyopathy
Heart failure	Contributory (secondary) causes of death: ICD10	Hypertensive heart disease with (congestive) heart failure,Hypertensive heart and renal disease with (congestive) heart failure,Hypertensive heart and renal disease with both (congestive) heart failure and renal failure,Ischaemic cardiomyopathy,Dilated cardiomyopathy,Other restrictive cardiomyopathy,Other cardiomyopathies,Cardiomyopathy, unspecified,Heart failure,Congestive heart failure,Left ven…	Obstructive hypertrophic cardiomyopathy,Other hypertrophic cardiomyopathy
Hypertrophic cardiomyopathy	Diagnoses - main ICD9	Hypertrophic obstructive cardiomyopathy
Hypertrophic cardiomyopathy	Diagnoses - secondary ICD9	Hypertrophic obstructive cardiomyopathy
Hypertrophic cardiomyopathy	Diagnoses - main ICD10	Obstructive hypertrophic cardiomyopathy,Other hypertrophic cardiomyopathy
Hypertrophic cardiomyopathy	Diagnoses - secondary ICD10	Obstructive hypertrophic cardiomyopathy,Other hypertrophic cardiomyopathy
Hypertrophic cardiomyopathy	Non-cancer illness code, self-reported	Hypertrophic cardiomyopathy (hcm / hocm)
Hypertrophic cardiomyopathy	Underlying (primary) cause of death: ICD10	Obstructive hypertrophic cardiomyopathy,Other hypertrophic cardiomyopathy
Hypertrophic cardiomyopathy	Contributory (secondary) causes of death: ICD10	Obstructive hypertrophic cardiomyopathy,Other hypertrophic cardiomyopathy
Implantable cardioverter defibrillator	Operative procedures - main OPCS	Cardioverter defibrillator introduced through the vein,Implantation of cardioverter defibrillator using one electrode lead,Implantation of cardioverter defibrillator using two electrode leads,Resiting of lead of cardioverter defibrillator,Renewal of cardioverter defibrillator,Removal of cardioverter defibrillator,Implantation of cardioverter defibrillator using three electrode leads
Implantable cardioverter defibrillator	Operative procedures - secondary OPCS	Cardioverter defibrillator introduced through the vein,Implantation of cardioverter defibrillator using one electrode lead,Implantation of cardioverter defibrillator using two electrode leads,Resiting of lead of cardioverter defibrillator,Renewal of cardioverter defibrillator,Removal of cardioverter defibrillator,Implantation of cardioverter defibrillator using three electrode leads
Mitral valve prolapse	Non-cancer illness code, self-reported	Mitral valve prolapse
Mitral valve prolapse	Diagnoses - main ICD10	Mitral (valve) prolapse
Mitral valve prolapse	Diagnoses - secondary ICD10	Mitral (valve) prolapse
Mitral valve prolapse	Underlying (primary) cause of death: ICD10	Mitral (valve) prolapse
Mitral valve prolapse	Contributory (secondary) causes of death: ICD10	Mitral (valve) prolapse
Nonischemic cardiomyopathy	Non-cancer illness code, self-reported	Heart failure/pulmonary odema,Cardiomyopathy	Hypertrophic cardiomyopathy (hcm / hocm)
Nonischemic cardiomyopathy	Diagnoses - main ICD9	Other primary cardiomyopathies,Congestive heart failure,Left heart failure,Heart failure, unspecified
Nonischemic cardiomyopathy	Diagnoses - secondary ICD9	Other primary cardiomyopathies,Congestive heart failure,Left heart failure,Heart failure, unspecified
Nonischemic cardiomyopathy	Diagnoses - main ICD10	Hypertensive heart disease with (congestive) heart failure,Hypertensive heart and renal disease with (congestive) heart failure,Hypertensive heart and renal disease with both (congestive) heart failure and renal failure,Ischaemic cardiomyopathy,Dilated cardiomyopathy,Other restrictive cardiomyopathy,Other cardiomyopathies,Cardiomyopathy, unspecified,Heart failure,Congestive heart failure,Left ven…	Obstructive hypertrophic cardiomyopathy,Other hypertrophic cardiomyopathy
Nonischemic cardiomyopathy	Diagnoses - secondary ICD10	Hypertensive heart disease with (congestive) heart failure,Hypertensive heart and renal disease with (congestive) heart failure,Hypertensive heart and renal disease with both (congestive) heart failure and renal failure,Ischaemic cardiomyopathy,Dilated cardiomyopathy,Other restrictive cardiomyopathy,Other cardiomyopathies,Cardiomyopathy, unspecified,Heart failure,Congestive heart failure,Left ven…	Obstructive hypertrophic cardiomyopathy,Other hypertrophic cardiomyopathy
Nonischemic cardiomyopathy	Underlying (primary) cause of death: ICD10	Hypertensive heart disease with (congestive) heart failure,Hypertensive heart and renal disease with (congestive) heart failure,Hypertensive heart and renal disease with both (congestive) heart failure and renal failure,Ischaemic cardiomyopathy,Dilated cardiomyopathy,Other restrictive cardiomyopathy,Other cardiomyopathies,Cardiomyopathy, unspecified,Heart failure,Congestive heart failure,Left ven…	Obstructive hypertrophic cardiomyopathy,Other hypertrophic cardiomyopathy
Nonischemic cardiomyopathy	Contributory (secondary) causes of death: ICD10	Hypertensive heart disease with (congestive) heart failure,Hypertensive heart and renal disease with (congestive) heart failure,Hypertensive heart and renal disease with both (congestive) heart failure and renal failure,Ischaemic cardiomyopathy,Dilated cardiomyopathy,Other restrictive cardiomyopathy,Other cardiomyopathies,Cardiomyopathy, unspecified,Heart failure,Congestive heart failure,Left ven…	Obstructive hypertrophic cardiomyopathy,Other hypertrophic cardiomyopathy
Pacemaker	Pace-maker, verbal interview	Yes
Pacemaker	Diagnoses - main ICD10	Encounter for adjustment and management of cardiac pacemaker
Pacemaker	Diagnoses - secondary ICD10	Encounter for adjustment and management of cardiac pacemaker
Pacemaker	Operation code, self-reported	Pacemaker/defibrillator insertion,Pacemaker insertion,Pacemaker battery change
Pacemaker	Operative procedures - main OPCS	Cardiac pacemaker system introduced through vein,Implantation of intravenous cardiac pacemaker system NEC,Resiting of lead of intravenous cardiac pacemaker system,Renewal of intravenous cardiac pacemaker system,Removal of intravenous cardiac pacemaker system,Implantation of intravenous single chamber cardiac pacemaker system,Implantation of intravenous dual chamber cardiac pacemaker system,Implan…
Pacemaker	Operative procedures - secondary OPCS	Cardiac pacemaker system introduced through vein,Implantation of intravenous cardiac pacemaker system NEC,Resiting of lead of intravenous cardiac pacemaker system,Renewal of intravenous cardiac pacemaker system,Removal of intravenous cardiac pacemaker system,Implantation of intravenous single chamber cardiac pacemaker system,Implantation of intravenous dual chamber cardiac pacemaker system,Implan…
Sinus node dysfunction	Non-cancer illness code, self-reported	Sick sinus syndrome	Heart valve problem / heart murmur,Mitral valve prolapse,Mitral stenosis,Mitral stenosis,Aortic stenosis,Aortic stenosis,Mitral valve disease,Mitral regurgitation / incompetence,Mitral regurgitation / incompetence,Aortic valve disease,Aortic regurgitation / incompetence,Aortic regurgitation / incompetence
Sinus node dysfunction	Diagnoses - main ICD9		Mitral stenosis,Mitral stenosis,Mitral stenosis with insufficiency,Mitral stenosis with insufficiency,Mitral stenosis with insufficiency,Other and unspecified diseases of mitral valve,Rheumatic aortic insufficiency,Rheumatic aortic insufficiency,Other and unspecified diseases of aortic valve,Mitral valve disorders,Aortic valve disorders,Pulmonary valve disorders
Sinus node dysfunction	Diagnoses - secondary ICD9		Mitral stenosis,Mitral stenosis,Mitral stenosis with insufficiency,Mitral stenosis with insufficiency,Mitral stenosis with insufficiency,Other and unspecified diseases of mitral valve,Rheumatic aortic insufficiency,Rheumatic aortic insufficiency,Other and unspecified diseases of aortic valve,Mitral valve disorders,Aortic valve disorders,Pulmonary valve disorders
Sinus node dysfunction	Diagnoses - main ICD10	Sick sinus syndrome	Rheumatic mitral valve diseases,Mitral stenosis,Mitral stenosis,Rheumatic mitral insufficiency,Rheumatic mitral insufficiency,Mitral stenosis with insufficiency,Mitral stenosis with insufficiency,Other mitral valve diseases,Mitral valve disease, unspecified,Rheumatic aortic valve diseases,Rheumatic aortic stenosis,Rheumatic aortic stenosis,Rheumatic aortic insufficiency,Rheumatic aortic insuffici…
Sinus node dysfunction	Diagnoses - secondary ICD10	Sick sinus syndrome	Rheumatic mitral valve diseases,Mitral stenosis,Mitral stenosis,Rheumatic mitral insufficiency,Rheumatic mitral insufficiency,Mitral stenosis with insufficiency,Mitral stenosis with insufficiency,Other mitral valve diseases,Mitral valve disease, unspecified,Rheumatic aortic valve diseases,Rheumatic aortic stenosis,Rheumatic aortic stenosis,Rheumatic aortic insufficiency,Rheumatic aortic insuffici…
Sinus node dysfunction	Operation code, self-reported		Heart valve surgery,Aortic valve repair / replacement,Mitral valve repair / replacement,Other valve repair / replacement
Sinus node dysfunction	Operative procedures - main OPCS		Transplantation of heart and lung,Allotransplantation of heart and lung,Other transplantation of heart,Allotransplantation of heart NEC,Implantation of prosthetic heart,Repair of tetralogy of Fallot,Repair of tetralogy of Fallot using valved right ventricular outflow conduit,Repair of tetralogy of Fallot using right ventricular outflow conduit NEC,Revision of repair of tetralogy of Fallot,Correct…
Sinus node dysfunction	Operative procedures - secondary OPCS		Transplantation of heart and lung,Allotransplantation of heart and lung,Other transplantation of heart,Allotransplantation of heart NEC,Implantation of prosthetic heart,Repair of tetralogy of Fallot,Repair of tetralogy of Fallot using valved right ventricular outflow conduit,Repair of tetralogy of Fallot using right ventricular outflow conduit NEC,Revision of repair of tetralogy of Fallot,Correct…
Sinus node dysfunction	Source of first MI		Self-report only,Hospital admission,Death only
Sinus node dysfunction	Underlying (primary) cause of death: ICD10	Sick sinus syndrome	Rheumatic mitral valve diseases,Mitral stenosis,Mitral stenosis,Rheumatic mitral insufficiency,Rheumatic mitral insufficiency,Mitral stenosis with insufficiency,Mitral stenosis with insufficiency,Other mitral valve diseases,Mitral valve disease, unspecified,Rheumatic aortic valve diseases,Rheumatic aortic stenosis,Rheumatic aortic stenosis,Rheumatic aortic insufficiency,Rheumatic aortic insuffici…
Sinus node dysfunction	Contributory (secondary) causes of death: ICD10	Sick sinus syndrome	Rheumatic mitral valve diseases,Mitral stenosis,Mitral stenosis,Rheumatic mitral insufficiency,Rheumatic mitral insufficiency,Mitral stenosis with insufficiency,Mitral stenosis with insufficiency,Other mitral valve diseases,Mitral valve disease, unspecified,Rheumatic aortic valve diseases,Rheumatic aortic stenosis,Rheumatic aortic stenosis,Rheumatic aortic insufficiency,Rheumatic aortic insuffici…
Valve Disease	Non-cancer illness code, self-reported	Aortic stenosis,Aortic valve disease,Aortic regurgitation / incompetence,Mitral valve prolapse,Mitral stenosis,Mitral valve disease,Mitral regurgitation / incompetence,Heart valve problem / heart murmur
Valve Disease	Diagnoses - main ICD9	Rheumatic aortic insufficiency,Other and unspecified diseases of aortic valve,Aortic valve disorders,Mitral stenosis,Mitral stenosis with insufficiency,Other and unspecified diseases of mitral valve,Mitral valve disorders,Pulmonary valve disorders
Valve Disease	Diagnoses - secondary ICD9	Rheumatic aortic insufficiency,Other and unspecified diseases of aortic valve,Aortic valve disorders,Mitral stenosis,Mitral stenosis with insufficiency,Other and unspecified diseases of mitral valve,Mitral valve disorders,Pulmonary valve disorders
Valve Disease	Diagnoses - main ICD10	Rheumatic aortic valve diseases,Rheumatic aortic stenosis,Rheumatic aortic insufficiency,Rheumatic aortic stenosis with insufficiency,Other rheumatic aortic valve diseases,Rheumatic aortic valve disease, unspecified,Disorders of both mitral and aortic valves,Disorders of both aortic and tricuspid valves,Combined disorders of mitral, aortic and tricuspid valves,Nonrheumatic aortic valve disorders,…
Valve Disease	Diagnoses - secondary ICD10	Rheumatic aortic valve diseases,Rheumatic aortic stenosis,Rheumatic aortic insufficiency,Rheumatic aortic stenosis with insufficiency,Other rheumatic aortic valve diseases,Rheumatic aortic valve disease, unspecified,Disorders of both mitral and aortic valves,Disorders of both aortic and tricuspid valves,Combined disorders of mitral, aortic and tricuspid valves,Nonrheumatic aortic valve disorders,…
Valve Disease	Operation code, self-reported	Aortic valve repair / replacement,Mitral valve repair / replacement,Heart valve surgery,Other valve repair / replacement
Valve Disease	Operative procedures - main OPCS	Plastic repair of aortic valve,Allograft replacement of aortic valve,Xenograft replacement of aortic valve,Prosthetic replacement of aortic valve,Replacement of aortic valve NEC,Aortic valve repair NEC,Other specified plastic repair of aortic valve,Unspecified plastic repair of aortic valve,Revision of plastic repair of aortic valve,Plastic repair of mitral valve,Allograft replacement of mitral v…
Valve Disease	Operative procedures - secondary OPCS	Plastic repair of aortic valve,Allograft replacement of aortic valve,Xenograft replacement of aortic valve,Prosthetic replacement of aortic valve,Replacement of aortic valve NEC,Aortic valve repair NEC,Other specified plastic repair of aortic valve,Unspecified plastic repair of aortic valve,Revision of plastic repair of aortic valve,Plastic repair of mitral valve,Allograft replacement of mitral v…
Valve Disease	Underlying (primary) cause of death: ICD10	Rheumatic aortic valve diseases,Rheumatic aortic stenosis,Rheumatic aortic insufficiency,Rheumatic aortic stenosis with insufficiency,Other rheumatic aortic valve diseases,Rheumatic aortic valve disease, unspecified,Disorders of both mitral and aortic valves,Disorders of both aortic and tricuspid valves,Combined disorders of mitral, aortic and tricuspid valves,Nonrheumatic aortic valve disorders,…
Valve Disease	Contributory (secondary) causes of death: ICD10	Rheumatic aortic valve diseases,Rheumatic aortic stenosis,Rheumatic aortic insufficiency,Rheumatic aortic stenosis with insufficiency,Other rheumatic aortic valve diseases,Rheumatic aortic valve disease, unspecified,Disorders of both mitral and aortic valves,Disorders of both aortic and tricuspid valves,Combined disorders of mitral, aortic and tricuspid valves,Nonrheumatic aortic valve disorders,…
Ventricular arrhythmia	Diagnoses - main ICD9	Paroxysmal ventricular tachycardia,Ventricular fibrillation and flutter,Cardiac arrest
Ventricular arrhythmia	Diagnoses - secondary ICD9	Paroxysmal ventricular tachycardia,Ventricular fibrillation and flutter,Cardiac arrest
Ventricular arrhythmia	Diagnoses - main ICD10	Reentry ventricular arrhythmia,Ventricular tachycardia,Ventricular fibrillation and flutter,Cardiac arrest with successful resuscitation,Sudden cardiac death, so described,Cardiac arrest, unspecified
Ventricular arrhythmia	Diagnoses - secondary ICD10	Reentry ventricular arrhythmia,Ventricular tachycardia,Ventricular fibrillation and flutter,Cardiac arrest with successful resuscitation,Sudden cardiac death, so described,Cardiac arrest, unspecified
Ventricular arrhythmia	Operative procedures - main OPCS	Percutaneous transluminal ablation of ventricular wall NEC,Percutaneous radiofrequency ablation of epicardium,Advanced cardiac pulmonary resuscitation,External ventricular defibrillation,Other specified external resuscitation,Unspecified external resuscitation
Ventricular arrhythmia	Operative procedures - secondary OPCS	Percutaneous transluminal ablation of ventricular wall NEC,Percutaneous radiofrequency ablation of epicardium,Advanced cardiac pulmonary resuscitation,External ventricular defibrillation,Other specified external resuscitation,Unspecified external resuscitation
Ventricular arrhythmia	Underlying (primary) cause of death: ICD10	Reentry ventricular arrhythmia,Ventricular tachycardia,Ventricular fibrillation and flutter,Cardiac arrest with successful resuscitation,Sudden cardiac death, so described,Cardiac arrest, unspecified
Ventricular arrhythmia	Contributory (secondary) causes of death: ICD10	Reentry ventricular arrhythmia,Ventricular tachycardia,Ventricular fibrillation and flutter,Cardiac arrest with successful resuscitation,Sudden cardiac death, so described,Cardiac arrest, unspecified
Ventricular premature depolarizations	Diagnoses - main ICD10	Ventricular premature depolarisation
Ventricular premature depolarizations	Diagnoses - secondary ICD10	Ventricular premature depolarisation
Ventricular premature depolarizations	Underlying (primary) cause of death: ICD10	Ventricular premature depolarisation
Ventricular premature depolarizations	Contributory (secondary) causes of death: ICD10	Ventricular premature depolarisation
